# Supplementary material for: A mechanical force sensor controls touch-triggered floral organ movement through manipulation of calcium signature in Torenia fournieri
Source: Research Square preprint supplement (doi:10.21203/rs.3.rs-4915676/v1), 2024-09-27
Supplement: Supplementary file 1 [file 68c30ebbadc17e78bf4f2c5b.xlsx]

## Sheet: All
Tab. S1 Differential gene expression analysis between stigma and style
Differential expression analysis of all genes conducted using the EdgeR package, stigma_1/2/3 and style_1/2/3 refer to three biological replicates of Torenia samples.
* Gene name; ** the log fold change from the FPKM value;
reference_id*	stigma_1	stigma_2	stigma_3	style_1	style_2	style_3	logfc**	FDR	symbol	Description
Unigene0035676	993.86	975.43	1128.67	16.24	15.74	13.18	6.10013	0	MLP34	XP_012846588.1 PREDICTED: MLP-like protein 423 [Erythranthe guttata]
Unigene0030637	13.69	15.27	9.88	2853.29	2157.51	2927.11	-7.67507	1.60344e-294	--	-
Unigene0034758	2.26	2.92	1.62	232.14	222.01	242.82	-6.67942	4.82489e-253	SBT1.7	XP_011069783.1 subtilisin-like protease SBT1.7 [Sesamum indicum]
Unigene0025097	75.67	79.45	92.12	1.78	2.25	1.99	5.36	1.45345e-231	TCP13	XP_011099021.1 transcription factor TCP5-like [Sesamum indicum]
Unigene0033481	152.56	172.88	159.1	14.46	16.13	13.51	3.45777	1.09332e-228	--	XP_011074612.1 uncharacterized protein LOC105159292 isoform X2 [Sesamum indicum]
Unigene0034942	34.81	41.7	42.1	545.16	510.68	497.12	-3.71072	1.43888e-221	FLZ8	XP_011079875.1 protein MARD1-like [Sesamum indicum]
Unigene0015062	224.74	233.3	212.93	0.45	1.28	0.55	8.20107	2.9127e-221	EXPA7	XP_011077647.2 expansin-A6-like [Sesamum indicum]
Unigene0011542	3899.23	3211.16	3879.34	45.84	61.23	35.24	6.27098	5.14115e-193	MSL6	PIN02392.1 putative mechanosensitive ion channel [Handroanthus impetiginosus]
Unigene0024083	3.19	4.44	3.28	115.35	115.99	139.11	-5.08556	1.64396e-191	PIN1A	XP_011084207.1 probable auxin efflux carrier component 1c [Sesamum indicum]
Unigene0005510	5.05	4.77	6.03	210.74	240.63	190.19	-5.33903	3.49213e-190	FBA2	XP_011088487.1 fructose-bisphosphate aldolase 1, chloroplastic [Sesamum indicum]
Unigene0028998	47.26	49.73	41.83	1.81	2.18	1.55	4.64719	7.00115e-189	--	XP_012835035.1 PREDICTED: paladin [Erythranthe guttata]
Unigene0027645	123.2	132.06	138.2	23.01	22.46	21.3	2.55895	1.05477e-182	--	PIN01755.1 hypothetical protein CDL12_25736 [Handroanthus impetiginosus]
Unigene0017954	378.7	334.44	399.66	9.1	9.72	6.1	5.48075	2.38723e-180	SKOR	XP_020551503.1 potassium channel SKOR-like [Sesamum indicum]
Unigene0032572	0.23	0.49	0.25	79.22	71.97	86.9	-7.93931	7.62901e-179	LNG1	PIM97877.1 hypothetical protein CDL12_29650 [Handroanthus impetiginosus]
Unigene0031350	239.87	192.87	212.52	7.26	5.94	8.19	4.91487	4.45189e-178	AGL12	XP_011095942.1 agamous-like MADS-box protein AGL12 isoform X1 [Sesamum indicum]
Unigene0036412	191.06	205.04	188.55	40.88	43.33	42.26	2.20878	3.35199e-175	CRPK1	XP_011094993.1 putative serine/threonine-protein kinase [Sesamum indicum]
Unigene0030629	48.08	47.94	44.03	1.07	1.53	1.1	5.24227	1.51785e-174	At4g12980	PSR94965.1 Cytochrome b561 and DOMON domain-containing protein [Actinidia chinensis var. chinensis] [Actinidia chinensis]
Unigene0005837	4.72	4.47	5.45	94.18	99.98	97.79	-4.31773	2.60294e-173	AMY1.1	XP_011083843.1 alpha-amylase [Sesamum indicum]
Unigene0026732	25.16	26.07	27.84	255.42	278.28	249.18	-3.30759	5.25869e-172	MYB73	TEY72385.1 myb proto-oncogene protein, plant [Salvia splendens]
Unigene0031602	1.94	1.04	1.9	303.45	331.73	228.5	-7.46747	1.92755e-171	BNM2A	XP_011088371.1 BURP domain-containing protein BNM2A-like [Sesamum indicum]
Unigene0029940	5.37	7.73	6.55	147.57	136.87	148	-4.4599	4.4038e-170	GSTU19	XP_011082829.1 probable glutathione S-transferase [Sesamum indicum]
Unigene0024161	23.15	24.91	25.13	211.15	190.29	213.17	-3.06995	1.68292e-168	ALDH2B4	PIN01760.1 Aldehyde dehydrogenase [Handroanthus impetiginosus]
Unigene0025224	1.2	1.8	1.62	49.61	46.72	59.31	-5.07418	9.74497e-168	ABCC9	XP_011093464.1 putative ABC transporter C family member 15 isoform X1 [Sesamum indicum]
Unigene0011272	182.59	223.84	130.86	1.15	1.5	1.75	6.93205	3.90205e-165	SWEET16	XP_011092096.1 bidirectional sugar transporter SWEET16 [Sesamum indicum]
Unigene0010533	6.93	6.43	6.31	434.68	315.67	285.13	-5.71816	2.80783e-163	PRP4	XP_011092860.1 proline-rich protein 4-like [Sesamum indicum]
Unigene0028840	4285.71	4732.64	3437.18	268.6	306.63	296.65	3.83651	3.42897e-163	--	XP_010538465.1 PREDICTED: glycine-rich RNA-binding protein GRP2A [Tarenaya hassleriana]
Unigene0034471	173.98	177.25	167.08	27.16	30.49	29.77	2.56778	2.48678e-160	At5g03795	XP_011094445.1 probable glycosyltransferase At5g03795 [Sesamum indicum]
Unigene0004241	40.63	41.94	40.86	6.18	6.38	6.74	2.67702	7.98146e-160	PAD4	XP_011099680.1 lipase-like PAD4 [Sesamum indicum]
Unigene0019024	8.67	9.53	9.25	94.01	93.6	94.85	-3.36317	1.11611e-158	BZR1	XP_011074507.1 protein BRASSINAZOLE-RESISTANT 1 isoform X2 [Sesamum indicum]
Unigene0011321	0.47	0.41	0.6	124.96	104.82	127.15	-7.9139	7.93908e-158	--	XP_011074173.1 uncharacterized protein LOC105158948 [Sesamum indicum]
Unigene0013261	2.75	2	4.4	266.71	283.78	250.83	-6.45246	5.39052e-154	Os02g0460200	XP_011090952.1 flowering-promoting factor 1-like protein 3 [Sesamum indicum]
Unigene0000514	796.09	723.75	890.56	90.64	90.44	98.62	3.10732	5.89112e-154	AAP3	KZV23195.1 hypothetical protein F511_05034 [Dorcoceras hygrometricum]
Unigene0025977	30.91	37.16	31.67	1.94	2.11	2.24	3.98704	2.44717e-153	ARR3	XP_020547775.1 two-component response regulator ARR3-like isoform X2 [Sesamum indicum]
Unigene0029866	109.73	99.67	122.19	3.7	5.33	4.46	4.61944	4.05011e-153	Os04g0179200	KZV28422.1 tropinone reductase-like 1 [Dorcoceras hygrometricum]
Unigene0025198	69.12	81.72	68.62	7.51	8.74	8.26	3.16252	5.39078e-153	GATA8	PIN15057.1 hypothetical protein CDL12_12320 [Handroanthus impetiginosus]
Unigene0036508	3.47	3.08	2.98	52.31	47.46	47.66	-3.95141	2.54775e-152	At2g26730	XP_006475765.1 probable inactive receptor kinase At2g26730 [Citrus sinensis]
Unigene0024117	151.67	124.46	107.08	1.07	1.9	1.04	6.57839	2.65378e-152	DDS	XP_011096562.1 dammarenediol II synthase-like [Sesamum indicum]
Unigene0009718	76.01	82.24	81.52	12.4	11.01	10.68	2.81423	2.15734e-151	GLO5	XP_021293864.1 peroxisomal (S)-2-hydroxy-acid oxidase isoform X2 [Herrania umbratica]
Unigene0034542	0.24	0.52	0.71	112.53	124.29	116.72	-7.90991	1.53824e-150	IDD14	XP_022853297.1 protein SHOOT GRAVITROPISM 5-like [Olea europaea var. sylvestris] [Olea europaea]
Unigene0031805	1115.58	879.82	1236.79	23.26	34.03	23.07	5.32989	1.45325e-148	C/VIF2	XP_011099754.1 cell wall / vacuolar inhibitor of fructosidase 2 [Sesamum indicum]
Unigene0036441	2.8	1.89	3.42	123.77	137.15	122.88	-5.56451	3.20879e-145	--	PIN06637.1 hypothetical protein CDL12_20806 [Handroanthus impetiginosus]
Unigene0015803	1.22	0.86	1.27	58.97	53.26	50.96	-5.60625	4.90085e-145	HHT1	XP_011075071.1 shikimate O-hydroxycinnamoyltransferase-like [Sesamum indicum]
Unigene0026005	1.16	0.9	0.89	43.73	41.75	41.3	-5.42547	1.20961e-143	DTX14	QBM79483.1 MATE53 [Rehmannia glutinosa]
Unigene0032703	67.43	67.02	64.42	2.28	2.15	2.19	4.90885	2.78313e-141	--	XP_011086360.1 uncharacterized protein LOC105168112 [Sesamum indicum]
Unigene0035604	2.64	2.47	2	45.74	45.77	45.85	-4.27197	1.70735e-139	SBT1.5	XP_011072681.1 subtilisin-like protease SBT1.5 [Sesamum indicum]
Unigene0007035	7	8.6	9.04	219.12	176.24	257.37	-4.72741	5.51243e-139	RPL39C	GER49299.1 60S ribosomal protein L39 [Striga asiatica]
Unigene0000691	1277.22	1249.7	1312.09	204.17	174.21	212.65	2.69943	8.16115e-137	APS1	XP_011080101.1 acid phosphatase 1 [Sesamum indicum]
Unigene0028959	78.82	80.47	58.92	1.82	2.41	1.74	5.19184	1.60281e-135	--	EYU33519.1 hypothetical protein MIMGU_mgv1a005341mg [Erythranthe guttata]
Unigene0014158	124.02	142.79	144.74	26.92	29.12	26.49	2.31808	5.2598e-135	--	-
Unigene0002563	0.08	0.07	0.19	71.27	65.97	66.85	-9.22946	7.92682e-135	--	KZV34813.1 extensin-2-like [Dorcoceras hygrometricum]
Unigene0033335	129.35	101.78	95.74	3.99	5.13	3.96	4.64328	4.31362e-133	NPF8.1	XP_028098706.1 protein NRT1/ PTR FAMILY 8.1-like [Camellia sinensis]
Unigene0025690	31.69	34.89	37.92	967.04	1084.41	711.53	-4.72465	5.6648e-133	CYP87A3	XP_011081025.1 cytochrome P450 87A3-like [Sesamum indicum]
Unigene0015285	75.68	101.24	81.06	4.58	5.53	5.1	4.08417	1.52131e-131	--	XP_009143294.1 uncharacterized protein LOC103867019 [Brassica rapa]
Unigene0013457	228.36	220.58	230.57	46.86	51.53	48.02	2.21448	2.50548e-130	BHLH75	XP_011078318.2 transcription factor bHLH75 [Sesamum indicum]
Unigene0024812	5.57	8.14	10.01	355.89	337.95	280.77	-5.36065	1.2118e-129	XTH16	BAH36870.1 xyloglucan endotransglycosylase/hydrolase, partial [Torenia fournieri]
Unigene0019873	3.42	4.36	3.32	68.48	63.7	75.42	-4.22517	2.21629e-128	--	PIN26364.1 hypothetical protein CDL12_00876 [Handroanthus impetiginosus]
Unigene0031561	203.42	267.76	143.52	3.95	4.81	4.16	5.5722	2.0726e-127	ERF5	PIN17894.1 hypothetical protein CDL12_09442 [Handroanthus impetiginosus]
Unigene0003648	225.74	257.78	271.22	44.9	41.37	41.92	2.5577	3.50963e-127	--	PIM98219.1 hypothetical protein CDL12_29304 [Handroanthus impetiginosus]
Unigene0034685	13.87	13.96	12.76	113.54	102.16	105.79	-2.98558	2.03863e-124	ARF3	XP_020554020.1 auxin response factor 3 isoform X1 [Sesamum indicum]
Unigene0022214	0.88	0.81	1.4	59.56	54.65	52.44	-5.75307	1.57749e-123	PKS2	XP_011075498.1 protein PHYTOCHROME KINASE SUBSTRATE 1 [Sesamum indicum]
Unigene0035177	22.41	18.87	14.34	466.75	454.49	480.34	-4.65531	1.72102e-123	--	-
Unigene0025047	124.78	122.45	140.44	5.93	6.89	9.37	4.12685	1.78122e-122	UPTG1	XP_011073091.1 UDP-arabinopyranose mutase 1 [Sesamum indicum]
Unigene0033963	124.1	140.33	118.29	27.05	24.5	26.28	2.29789	5.09223e-120	AHK4	XP_011070524.1 histidine kinase 4 [Sesamum indicum]
Unigene0000193	17738.5	14132.2	15523.8	1869.59	1991.03	1918.53	3.03579	6.28878e-120	LSAT_1X82001	XP_012831856.1 PREDICTED: non-specific lipid-transfer protein 1-like [Erythranthe guttata]
Unigene0026308	28.1	24.59	27.57	1.84	2.2	1.7	3.80556	1.42577e-119	--	XP_020554614.1 uncharacterized protein LOC105178381 [Sesamum indicum]
Unigene0029235	0.11	0.23	0.22	57.51	53.57	58.14	-8.23926	1.58422e-119	OPT5	XP_011069784.1 oligopeptide transporter 5-like [Sesamum indicum]
Unigene0018378	89.87	73.63	70.14	1.76	1.66	1.76	5.49519	4.18004e-119	--	PIM97908.1 hypothetical protein CDL12_29617 [Handroanthus impetiginosus]
Unigene0026314	0.27	0.13	0.29	85.68	96.88	117.33	-8.76362	4.9521e-119	--	TEY93580.1 hypothetical protein Saspl_022449 [Salvia splendens]
Unigene0024925	1.75	2.72	2.04	42.29	40.09	39.71	-4.22914	8.94268e-119	--	PIN05472.1 hypothetical protein CDL12_21980 [Handroanthus impetiginosus]
Unigene0025706	217.26	183.06	206.68	26.63	26.73	25.03	2.95295	1.20007e-118	--	XP_012856838.1 PREDICTED: uncharacterized protein LOC105976094 [Erythranthe guttata]
Unigene0001819	0.2	0.19	0.43	140.32	156.4	144.3	-9.071	1.84265e-118	--	XP_022841615.1 uncharacterized protein LOC111365358 isoform X1 [Olea europaea var. sylvestris] [Olea europaea]
Unigene0035247	99.94	105.56	72.19	3.66	3.23	4.3	4.63319	7.90311e-118	OSM34	XP_011081000.1 protein P21 [Sesamum indicum]
Unigene0013057	188.56	188.64	195.87	20.69	23.9	27.62	2.98844	1.39003e-117	--	PIN17818.1 hypothetical protein CDL12_09522 [Handroanthus impetiginosus]
Unigene0003919	0.7	0.42	0.48	99.69	87.11	104.01	-7.50586	1.50694e-117	EXL3	XP_011101128.1 protein EXORDIUM-like 3 [Sesamum indicum]
Unigene0033861	1.33	1.57	1.3	34.99	33.88	35.27	-4.63199	2.03259e-117	ALDH	Q8VXQ2.1 RecName: Full=Aldehyde dehydrogenase; AltName: Full=Cp-ALDH [Craterostigma plantagineum]
Unigene0030077	9.78	9.77	7.42	113.45	117.27	119.69	-3.69962	2.12374e-117	CBL3	XP_027185299.1 calcineurin B-like protein 2 [Coffea eugenioides]
Unigene0033776	8.26	12.87	12.75	216.29	197.34	205.69	-4.19218	3.53874e-117	AC97	XP_021855495.1 actin-11-like [Spinacia oleracea]
Unigene0012553	579.18	550.15	517.02	93.56	108.04	102.35	2.43737	6.31627e-116	At1g75040	XP_020551116.1 uncharacterized protein LOC105166296 [Sesamum indicum]
Unigene0030534	0.17	0.28	0.74	140.81	108.31	104.67	-8.21579	1.32571e-114	GP1	XP_012844795.1 PREDICTED: polygalacturonase-1 non-catalytic subunit beta-like [Erythranthe guttata]
Unigene0019909	66.21	75.54	49.34	0.59	0.92	0.38	6.65972	1.35644e-114	AMT1-1	TEY27957.1 ammonium transporter, Amt family [Salvia splendens]
Unigene0018581	81.96	97.46	95.59	17.15	14.61	15.06	2.55429	1.92481e-114	CPK13	XP_011077546.1 calcium-dependent protein kinase 13 [Sesamum indicum]
Unigene0000205	80.41	63.41	57.5	1.15	1.3	0.73	5.98432	5.10214e-114	DDS	AWM98359.1 beta-amyrin synthase [Osmanthus fragrans]
Unigene0013627	6.16	7.68	6.3	0.26	0.34	0.25	4.56646	1.54849e-113	pol	XP_012852936.1 PREDICTED: uncharacterized protein LOC105972521 [Erythranthe guttata]
Unigene0009155	78.39	74.97	57.2	2.41	2.77	2.94	4.69661	4.73606e-113	LFG4	GER24865.1 bax inhibitor-1 family protein [Striga asiatica]
Unigene0034658	115.73	96.93	145.11	1.72	2.39	1.04	6.11832	1.05368e-112	CYP76T24	XP_012845111.1 PREDICTED: geraniol 8-hydroxylase-like [Erythranthe guttata]
Unigene0031475	2.28	1.76	1.91	34.67	36.42	36.09	-4.171	1.44287e-112	--	XP_011101444.1 uncharacterized protein LOC105179496 [Sesamum indicum]
Unigene0005904	0.65	0.75	1.08	29.66	27.59	31.54	-5.16199	2.14139e-111	At2g26730	XP_011084098.1 probable inactive receptor kinase At2g26730 [Sesamum indicum]
Unigene0032860	34.3	43.18	48.24	0.39	0.68	0.21	6.61793	1.37901e-110	WRKY6	XP_011096037.1 WRKY transcription factor 6 [Sesamum indicum]
Unigene0031034	134.48	152.87	115.86	17.88	18.49	18.55	2.87613	1.58533e-110	HEC3	XP_027077794.1 transcription factor HEC3-like [Coffea arabica]
Unigene0000364	8318.29	6638.27	9290.57	737.47	811.41	830.8	3.34897	3.18482e-108	SBT4.15	PIN16828.1 Cucumisin [Handroanthus impetiginosus]
Unigene0008076	20481.7	18576.6	17535.9	1730	1979.41	2371.99	3.21818	5.86506e-108	LTP6	XP_011095136.1 non-specific lipid-transfer protein-like [Sesamum indicum]
Unigene0032876	71.2	63.56	88.89	0.38	0.66	0.24	7.44896	7.42274e-108	--	XP_011088564.1 uncharacterized protein LOC105169758 [Sesamum indicum]
Unigene0035544	43.4	42.67	31.47	0.98	1.44	1.12	5.05326	1.02439e-107	CYP86A22	XP_011072860.1 cytochrome P450 86A22 [Sesamum indicum]
Unigene0004004	6.7	7.23	5.96	95.15	98.06	115.3	-3.9552	6.01762e-107	SAUR76	TEY83611.1 hypothetical protein Saspl_016918 [Salvia splendens]
Unigene0024329	3.09	3.67	1.61	182.41	200.4	262	-6.2675	4.25468e-106	MIF2	TEY77058.1 hypothetical protein Saspl_008759 [Salvia splendens]
Unigene0008144	181.75	221.79	114.96	1.37	1.11	0.45	7.4673	2.27595e-104	IPT1	GER44395.1 adenylate isopentenyltransferase [Striga asiatica]
Unigene0024766	0.09	0.28	0.24	91.54	72.71	125.73	-8.89293	2.28547e-104	RFS6	XP_011078382.1 probable galactinol--sucrose galactosyltransferase 6 [Sesamum indicum]
Unigene0025445	0.43	0.8	0.6	31.69	27.27	27.2	-5.5571	7.80885e-104	CNGC15C	XP_011089272.1 protein CNGC15b isoform X2 [Sesamum indicum]
Unigene0020057	54.2	46.13	50.16	7.77	7.67	6.96	2.7481	2.34479e-103	At4g27290	XP_011095279.2 G-type lectin S-receptor-like serine/threonine-protein kinase At4g27290 [Sesamum indicum]
Unigene0032436	87.28	96.61	96.32	21.07	17.2	18.84	2.29469	2.61579e-103	At4g18820	XP_011085319.1 protein STICHEL-like 4 [Sesamum indicum]
Unigene0000288	4.99	5.56	3.06	141.65	129.81	154.96	-4.96954	3.28266e-103	A1	PIN23801.1 Flavonol reductase/cinnamoyl-CoA reductase [Handroanthus impetiginosus]
Unigene0007771	19.13	18.81	13.42	246.71	264.36	264.71	-3.91693	8.87257e-103	MRS2-3	EYU42498.1 hypothetical protein MIMGU_mgv1a007140mg [Erythranthe guttata]
Unigene0031273	73.17	79.06	67.59	4.36	5.02	2.93	4.15842	1.03824e-102	HMG3	GER36654.1 3-hydroxy-3-methylglutaryl-coenzyme A reductase [Striga asiatica]
Unigene0031370	6.5	6.78	4.74	108.36	101.02	94.03	-4.0736	1.49864e-102	--	XP_011085144.1 plasma membrane-associated cation-binding protein 1 [Sesamum indicum]
Unigene0028438	9.7	10.67	8.92	75.93	70.3	80.85	-2.95472	1.89034e-102	At2g40480	XP_011076606.1 uncharacterized protein LOC105160811 [Sesamum indicum]
Unigene0003926	20.17	17.15	26.3	1.01	0.99	1.17	4.32693	2.23399e-102	CYP85A1	AJD25206.1 cytochrome P450 CYP85A1 [Salvia miltiorrhiza]
Unigene0027324	1.38	1.74	1.33	78.78	66.95	56.29	-5.50455	3.22498e-101	SAPK2	XP_011100039.1 serine/threonine-protein kinase SAPK2 [Sesamum indicum]
Unigene0022837	42.1	43.52	41.07	6.71	5.36	6.44	2.77493	3.2555e-101	At1g66480	PIN25996.1 hypothetical protein CDL12_01275 [Handroanthus impetiginosus]
Unigene0034817	0.46	0.32	0.71	107.59	90.48	120.21	-7.73884	4.22548e-101	LHCB5	RVW83576.1 Chlorophyll a-b binding protein CP26, chloroplastic [Vitis vinifera]
Unigene0015067	10.99	12.85	19.66	475.25	482.94	396.3	-4.96059	7.60443e-101	TPS7	XP_011096130.1 alpha-farnesene synthase [Sesamum indicum]
Unigene0029885	786.61	792.23	561.76	28.73	44.58	38.18	4.26303	3.14963e-99	pvadh	XP_011098591.2 uncharacterized protein LOC105177224 [Sesamum indicum]
Unigene0032068	2.6	1.1	3.03	230.81	212.61	213.34	-6.60862	3.66343e-98	TDT	XP_012849176.1 PREDICTED: LOW QUALITY PROTEIN: tonoplast dicarboxylate transporter [Erythranthe guttata]
Unigene0028582	19.73	18.8	17.26	2.03	2.42	2.16	3.07728	4.42806e-98	KIN8B	PIN00348.1 Kinesin-like protein [Handroanthus impetiginosus]
Unigene0032677	19.93	19.33	19.92	0.67	0.88	0.88	4.60608	4.63444e-98	JGB	TEY92740.1 hypothetical protein Saspl_016002 [Salvia splendens]
Unigene0012777	49.44	39.14	57.49	1.33	1.87	1.26	5.03347	9.44466e-98	HPAT3	XP_011080408.1 hydroxyproline O-arabinosyltransferase 3 [Sesamum indicum]
Unigene0034267	1.12	1.2	0.98	28.58	29.04	38.13	-4.85873	2.27552e-97	EO	XP_012844788.1 PREDICTED: 2-methylene-furan-3-one reductase-like [Erythranthe guttata]
Unigene0006066	23.39	24.15	17.42	246.8	251.61	251.55	-3.52919	6.35995e-97	XTH30	XP_019259733.1 PREDICTED: probable xyloglucan endotransglucosylase/hydrolase protein 30 isoform X1 [Nicotiana attenuata]
Unigene0027237	37.74	35.61	36.93	7.38	6.56	6.36	2.44162	9.37113e-97	LECRKS2	XP_011091433.1 receptor like protein kinase S.2 [Sesamum indicum]
Unigene0025228	41.3	31.46	28.86	634.03	579.58	545.54	-4.11362	1.1814e-96	FTSHI2	XP_011080620.2 probable inactive ATP-dependent zinc metalloprotease FTSHI 2, chloroplastic [Sesamum indicum]
Unigene0026559	18.38	24.22	22.99	2.42	2.76	2.97	3.0086	1.42224e-96	TRM32	XP_020553381.1 uncharacterized protein LOC105174401 isoform X1 [Sesamum indicum]
Unigene0009680	633.45	769.01	439.36	29.79	36.32	31.76	4.23412	1.60662e-96	PDF1.4	XP_012843159.1 PREDICTED: defensin-like protein 19 [Erythranthe guttata]
Unigene0023673	2.4	1.55	2.2	92.53	78.26	73.88	-5.31411	3.08012e-96	LHCA4	PHT47726.1 Chlorophyll a-b binding protein P4, chloroplastic [Capsicum baccatum]
Unigene0027428	291.65	288.46	299.88	90.92	84.98	92.49	1.71316	5.49414e-96	DCAF11	PIN03740.1 WD40 repeat-containing protein [Handroanthus impetiginosus]
Unigene0034360	1.38	1.67	3.58	319.78	256.87	215.52	-6.90066	6.6027e-96	--	XP_011073282.1 uncharacterized protein LOC105158282 [Sesamum indicum]
Unigene0005803	2.17	1.96	2.32	27.36	30.06	32.55	-3.80207	1.09131e-95	--	PIM97703.1 Ubiquitin--protein ligase [Handroanthus impetiginosus]
Unigene0031582	9.04	10.55	8.31	77.4	83.87	92.64	-3.18598	3.91307e-95	KUA1	XP_011086441.1 transcription factor MYB1R1 [Sesamum indicum]
Unigene0024029	9.3	10.25	6.62	145.47	130.5	147.06	-4.01477	4.7114e-95	LAX2	PIN25035.1 Amino acid transporter [Handroanthus impetiginosus]
Unigene0025702	9.77	10.92	11.35	155.51	119.45	167.64	-3.78806	4.7114e-95	PIP2-7	AOA52194.1 aquaporin PIP2;2 [Olea europaea]
Unigene0018360	63.86	71.99	57.41	11.6	10.45	11.26	2.53652	5.90488e-95	--	TEY91664.1 hypothetical protein Saspl_013605 [Salvia splendens]
Unigene0025564	64.04	47.26	61.17	0.48	1.14	0.42	6.40163	9.04525e-95	CYP90C1	XP_011083167.1 3-epi-6-deoxocathasterone 23-monooxygenase [Sesamum indicum]
Unigene0028668	16.16	11.9	14.69	240.7	266.67	204.71	-4.05804	1.61995e-94	CCD4	PIN01066.1 Beta, beta-carotene 15,15'-dioxygenase [Handroanthus impetiginosus]
Unigene0019189	0.6	0.16	0.72	92.87	77.3	82.67	-7.41648	4.0656e-94	--	-
Unigene0031532	4.94	7.42	5.75	101.26	82.56	87.51	-3.90519	5.09885e-94	PCAP1	XP_011085144.1 plasma membrane-associated cation-binding protein 1 [Sesamum indicum]
Unigene0031088	1.43	0.62	1.61	147.92	130.9	108.79	-6.72662	6.71887e-94	MLP31	XP_011075467.2 kirola-like [Sesamum indicum]
Unigene0035439	121.12	152.08	129.19	32.13	33.74	33.51	2.01757	1.63643e-93	--	XP_011079570.1 uncharacterized protein LOC105163060 [Sesamum indicum]
Unigene0021369	90	93.66	98.57	27.45	25.73	28.38	1.79094	1.67511e-93	NAT6	XP_011087158.1 nucleobase-ascorbate transporter 6 [Sesamum indicum]
Unigene0030235	124.95	138.36	112.99	11	9.65	14.55	3.41824	1.76901e-93	--	XP_027071192.1 protein NUCLEAR FUSION DEFECTIVE 4-like [Coffea arabica]
Unigene0009069	156.39	135.98	126.52	14.05	17.17	18.07	3.0872	1.88374e-93	AVP1	GER44108.1 K(+)-insensitive pyrophosphate-energized protonpump [Striga asiatica]
Unigene0027773	1.21	1.33	1.74	154.08	83.15	132.64	-6.43326	6.72147e-93	RBCS	XP_012836597.1 PREDICTED: ribulose bisphosphate carboxylase small chain 2, chloroplastic-like [Erythranthe guttata]
Unigene0026669	34.64	35.81	32.66	4.19	5.22	4.77	2.86225	7.38205e-93	--	PKI40779.1 hypothetical protein CRG98_038790 [Punica granatum]
Unigene0011912	28.61	34.68	31.36	4.19	3.82	4.94	2.86965	2.81929e-92	NPF2.13	XP_011086410.1 protein NRT1/ PTR FAMILY 2.13-like isoform X1 [Sesamum indicum]
Unigene0003943	0.42	0.83	1.14	63.16	50.82	66.33	-6.23732	1.05974e-91	PMR5	XP_011089477.1 protein PMR5 [Sesamum indicum]
Unigene0024236	0.47	0.46	0.39	41.64	39.39	51.23	-6.6467	2.21612e-91	GT5	XP_011097210.1 anthocyanidin 3-O-glucosyltransferase 5-like [Sesamum indicum]
Unigene0026311	1.96	2.17	1.9	31.3	34.73	34.99	-4.06634	2.23527e-91	IAA27	XP_011072390.1 auxin-responsive protein IAA27 [Sesamum indicum]
Unigene0033049	2.69	3.22	2.15	57.21	47.15	61.67	-4.36452	5.53573e-91	EMB3004	PIN14374.1 Pentafunctional AROM protein [Handroanthus impetiginosus]
Unigene0028167	153.15	165.06	201.36	31.18	27.88	28.74	2.56503	5.61287e-91	At5g03795	XP_011094446.1 probable glycosyltransferase At5g03795 [Sesamum indicum]
Unigene0010773	6.01	8.73	7.72	71.55	68.25	67.1	-3.2035	1.04647e-90	GAI1	XP_011070609.1 DELLA protein GAI1 [Sesamum indicum]
Unigene0032542	13.1	16.99	18.09	1.12	1.09	1.39	3.74237	1.28627e-90	JMJ706	XP_011069691.1 lysine-specific demethylase JMJ706 [Sesamum indicum]
Unigene0029797	30.08	25.06	30.18	0.5	0.61	0.44	5.78254	2.55074e-90	OMT3	PIN24698.1 Hydroxyindole-O-methyltransferase [Handroanthus impetiginosus]
Unigene0026280	1.18	1.07	2.77	125.29	159.08	156.91	-6.45786	2.97125e-89	WAT1	XP_012842775.1 PREDICTED: protein WALLS ARE THIN 1-like [Erythranthe guttata]
Unigene0017144	2.49	4.09	3.82	60.43	60.71	57.71	-4.10409	4.87322e-89	--	XP_009619650.1 PREDICTED: uncharacterized protein LOC104111618 isoform X2 [Nicotiana tomentosiformis]
Unigene0026684	67.6	68.7	58.82	11.81	11.76	10.82	2.5043	6.04447e-89	ACT2	VAI01729.1 unnamed protein product [Triticum turgidum subsp. durum] [Triticum turgidum]
Unigene0017588	46.88	31.07	35.1	0.69	0.86	0.38	5.87222	2.04328e-88	SLAH2	XP_011076467.1 S-type anion channel SLAH2 [Sesamum indicum]
Unigene0007528	89.89	99.42	83.32	13.2	13.07	16.09	2.68617	2.10576e-88	ERF008	XP_011074400.1 ethylene-responsive transcription factor ERF008-like [Sesamum indicum]
Unigene0034830	28.36	25.96	29.8	2.19	2.63	2.67	3.48941	4.61929e-88	ACLA-1	XP_011086595.1 ATP-citrate synthase alpha chain protein 1 [Sesamum indicum]
Unigene0028439	0.25	0.54	0.7	49.16	52.85	66.85	-6.82437	9.30934e-87	At2g40480	PIN20483.1 hypothetical protein CDL12_06830 [Handroanthus impetiginosus]
Unigene0023777	1115.95	1426.42	1451.03	242.79	208.43	257.34	2.49466	1.22729e-86	TUBB1	XP_011075465.1 tubulin beta-5 chain [Sesamum indicum]
Unigene0028804	10.38	9.71	6.23	385.14	343.3	249.97	-5.21621	1.35912e-86	MLP149	GER37345.1 polyketide cyclase/dehydrase and lipid transportsuperfamily protein [Striga asiatica]
Unigene0030594	4.36	3.94	5.53	59.95	52.2	52.93	-3.57729	1.85803e-86	CESA2	XP_011090445.1 cellulose synthase A catalytic subunit 2 [UDP-forming] [Sesamum indicum]
Unigene0012248	4.8	3.21	4.81	183.89	156.94	114.19	-5.14946	2.25135e-86	PMEU1	XP_011072691.1 pectinesterase-like [Sesamum indicum]
Unigene0024736	332.4	352.64	347.08	70.71	66.99	85.8	2.20726	4.62475e-86	PRCP	XP_011089978.1 lysosomal Pro-X carboxypeptidase [Sesamum indicum]
Unigene0000726	5.68	5.94	7.25	107.78	84.94	84.52	-3.87697	1.09675e-85	CRD1	XP_011079232.1 magnesium-protoporphyrin IX monomethyl ester [oxidative] cyclase, chloroplastic [Sesamum indicum]
Unigene0036067	79.8	57.86	61.23	0.83	0.64	1.64	5.99891	1.37506e-85	YUC3	XP_011080140.1 probable indole-3-pyruvate monooxygenase YUCCA5 [Sesamum indicum]
Unigene0035485	22.33	26.08	26.31	0.89	0.95	1.4	4.52743	1.59069e-85	PUMP5	XP_015074766.1 mitochondrial uncoupling protein 5-like [Solanum pennellii]
Unigene0016983	60.67	63.59	68.39	12.14	10.31	11.38	2.50961	1.7057e-85	VQ4	PIN08149.1 hypothetical protein CDL12_19277 [Handroanthus impetiginosus]
Unigene0007087	28.5	23.26	30.7	2.41	2.44	2.87	3.41702	1.82869e-85	--	XP_011082070.1 protein NUCLEAR FUSION DEFECTIVE 4 [Sesamum indicum]
Unigene0033304	2.87	3.29	2.4	79.85	58.75	61.59	-4.54762	1.02163e-84	PSBP1	XP_011085433.1 oxygen-evolving enhancer protein 2-1, chloroplastic-like [Sesamum indicum]
Unigene0027258	124.75	140.65	96.26	4.06	4.07	6.96	4.58297	1.67911e-84	PUP10	XP_011096513.1 probable purine permease 9 isoform X1 [Sesamum indicum]
Unigene0005305	6.37	8.32	5.32	77.8	79.53	83.01	-3.58628	2.05226e-84	TCP8	PIN15356.1 hypothetical protein CDL12_11997 [Handroanthus impetiginosus]
Unigene0026306	4.67	5.36	3.83	76.19	78.59	59.06	-3.94753	4.54855e-84	AVT6C	PIN20480.1 Amino acid transporter protein [Handroanthus impetiginosus]
Unigene0008010	25.56	27.78	18.47	0.97	1.13	1.3	4.40058	5.22222e-84	PILS1	XP_011100000.1 protein PIN-LIKES 3 isoform X2 [Sesamum indicum]
Unigene0030557	98.57	104.36	92.91	391.98	401.17	406.85	-2.02015	7.82023e-84	YDA	XP_011080940.2 LOW QUALITY PROTEIN: mitogen-activated protein kinase kinase kinase YODA [Sesamum indicum]
Unigene0018998	8.49	5.76	5.28	129.33	153.61	141.92	-4.44322	1.03667e-83	GRXC6	PIN06834.1 Glutaredoxin [Handroanthus impetiginosus]
Unigene0015522	2238.29	1935.09	2037.94	472.25	457.27	425.43	2.19666	2.07648e-83	Cyp96T1	KZV36259.1 hypothetical protein F511_14277 [Dorcoceras hygrometricum]
Unigene0032629	54.18	62.27	57.67	1.77	3.15	1.35	4.79547	3.57906e-83	At2g25520	XP_011081573.1 probable sugar phosphate/phosphate translocator At2g25520 [Sesamum indicum]
Unigene0023108	2.09	2.25	1.94	80.6	72.4	57.86	-5.06938	1.55551e-82	LHCA1	PIN09699.1 hypothetical protein CDL12_17710 [Handroanthus impetiginosus]
Unigene0023607	51.35	53.93	31.48	2.41	2.61	2.21	4.24151	1.55551e-82	ABCG39	XP_011076913.1 pleiotropic drug resistance protein 2 [Sesamum indicum]
Unigene0027414	15.46	14.16	9.42	238.36	266.18	306.65	-4.37701	3.89956e-82	CBSX5	PIN22623.1 5'-AMP-activated protein kinase, gamma subunit [Handroanthus impetiginosus]
Unigene0004639	379.03	400.09	347.63	105.95	95.8	104.46	1.87957	4.3728e-82	--	XP_011096558.1 uncharacterized protein LOC105175709 [Sesamum indicum]
Unigene0007836	3.85	4.35	3.55	49.07	46.5	52.23	-3.65291	2.38251e-81	At1g54780	PIN21519.1 Acid phosphatase [Handroanthus impetiginosus]
Unigene0007113	38.22	39.78	41.62	9	10.38	10.03	2.02408	2.5895e-81	--	PIN18939.1 hypothetical protein CDL12_08393 [Handroanthus impetiginosus]
Unigene0033821	13.85	15.85	16.43	83.87	93.3	84.42	-2.50353	4.13838e-81	NHL6	XP_011080120.1 uncharacterized protein LOC105163464 [Sesamum indicum]
Unigene0001554	57.17	74.86	56.68	8.2	8.73	9.8	2.81964	8.22837e-81	--	XP_027061107.1 uncharacterized protein LOC113687777 [Coffea arabica]
Unigene0030661	39.3	45.25	36.39	5.5	5.46	6.83	2.76515	8.24329e-81	ZAT9	XP_011070953.1 zinc finger protein 91-like [Sesamum indicum]
Unigene0020252	11.26	12.69	9.59	111.46	112.22	134.89	-3.4183	1.20111e-80	--	NP_001287928.1 bZIP transcription factor [Cicer arietinum]
Unigene0016838	4.45	3.56	5.46	113.83	100.53	79.03	-4.445	1.21764e-80	LSI2	XP_011076136.1 putative transporter arsB [Sesamum indicum]
Unigene0036393	6.27	5.79	5.2	40.41	40.33	41.13	-2.81984	1.68618e-80	A4GALT	XP_011086099.1 lactosylceramide 4-alpha-galactosyltransferase [Sesamum indicum]
Unigene0027479	433.85	471.48	471.05	190.09	191.16	184.72	1.28208	4.25551e-80	At1g54290	KAA8523675.1 hypothetical protein F0562_010098 [Nyssa sinensis]
Unigene0029067	0.46	1.23	0.85	50.26	40.78	40.45	-5.69398	4.41903e-80	CAB8	XP_010547181.1 PREDICTED: chlorophyll a-b binding protein 8, chloroplastic [Tarenaya hassleriana]
Unigene0007936	525.4	434.47	447.94	90.49	85.44	80.06	2.45929	1.00516e-79	ABCG11	XP_011072099.1 ABC transporter G family member 11 [Sesamum indicum]
Unigene0033251	1.2	0.89	1.2	27.85	20.77	25.19	-4.48766	1.74043e-79	SELMODRAFT_444075	XP_011077956.1 inactive protein kinase SELMODRAFT_444075 [Sesamum indicum]
Unigene0032593	43.64	46.53	23.38	1417.18	1313.04	1138.63	-5.09051	1.93781e-79	--	-
Unigene0034904	4.16	4.28	5.19	51.38	47.37	46.52	-3.41388	2.01654e-79	FLZ14	XP_011093870.1 uncharacterized protein LOC105173708 [Sesamum indicum]
Unigene0032608	20.13	21.82	17.87	140.56	127.41	132.76	-2.74393	8.2249e-79	MIF2	EPS57373.1 hypothetical protein M569_17445, partial [Genlisea aurea]
Unigene0008911	0.08	0.13	0.02	100.55	84.3	97.81	-10.2632	9.47379e-79	Xyl2	XP_011092407.1 beta-xylosidase/alpha-L-arabinofuranosidase 2 [Sesamum indicum]
Unigene0030121	6.29	8.62	6.68	58.01	64.9	69.74	-3.15755	1.34703e-78	ATHB-5	PIN24611.1 Transcription factor HEX [Handroanthus impetiginosus]
Unigene0024614	1.02	1.28	1.45	71.69	55.19	39.16	-5.4685	1.90757e-78	URED	PIN13718.1 hypothetical protein CDL12_13669 [Handroanthus impetiginosus]
Unigene0003245	45.73	40.74	37.6	1.49	0.86	2.1	4.80121	3.11623e-78	At4g13710	PIN08700.1 Pectate lyase [Handroanthus impetiginosus]
Unigene0026388	24.47	20.96	21.79	0.28	0.73	0.59	5.39275	3.63955e-78	GIP2	XP_011099700.2 basic 7S globulin-like [Sesamum indicum]
Unigene0005725	400.59	376.89	200.1	12.08	14	11.47	4.70233	4.798e-78	AG118	XP_011082096.1 acetylornithine aminotransferase, chloroplastic/mitochondrial [Sesamum indicum]
Unigene0000112	0.55	0.29	0.66	189.6	164.2	102.3	-8.24824	7.3275e-78	CAB21	XP_015877003.1 chlorophyll a-b binding protein of LHCII type 1 [Ziziphus jujuba]
Unigene0023759	4.07	3.43	2.2	68.99	73.19	70.09	-4.45177	7.90521e-78	NAC079	PIN10842.1 hypothetical protein CDL12_16569 [Handroanthus impetiginosus]
Unigene0004102	232.24	261.41	265.05	88.4	92.64	86.12	1.50583	9.018e-78	HSPRO2	XP_011076720.1 nematode resistance protein-like HSPRO2 [Sesamum indicum]
Unigene0015308	1.3	0.98	0.73	35.79	56.86	45.94	-5.52492	9.018e-78	GGT3	XP_018846370.1 PREDICTED: gamma-glutamyltranspeptidase 3-like [Juglans regia]
Unigene0027866	62.59	75.88	69.11	17.7	17.11	19.46	1.93544	1.87373e-77	GDH2	PIM99892.1 Glutamate/leucine/phenylalanine/valine dehydrogenase [Handroanthus impetiginosus]
Unigene0028400	4.9	8.51	4	163.49	206.39	176.12	-4.97091	8.01113e-77	PNC1	PIN15750.1 Peroxidase [Handroanthus impetiginosus]
Unigene0006639	160.34	152.79	150.88	19.91	20.81	14	3.08402	1.47099e-76	ARF6	XP_011096636.1 auxin response factor 6 isoform X2 [Sesamum indicum]
Unigene0012830	6.83	5.79	9.23	121.7	116.38	100.77	-3.95494	1.94454e-76	GDPDL4	XP_011097815.1 glycerophosphodiester phosphodiesterase GDPDL3 [Sesamum indicum]
Unigene0019178	0.54	0.9	0.34	28.15	26.52	34.15	-5.64094	2.99826e-76	MYOB3	XP_011097517.1 myosin-binding protein 3 [Sesamum indicum]
Unigene0000022	0.77	0.22	0.4	34.99	31.69	30.4	-6.12602	4.67045e-76	CESA2	PIN04483.1 Cellulose synthase (GDP-forming) [Handroanthus impetiginosus]
Unigene0026465	419.35	515.82	509.38	149.48	155.7	158.41	1.6397	9.44353e-76	HMGR2	KZV41542.1 3-hydroxy-3-methylglutaryl-coenzyme A reductase 1-like [Dorcoceras hygrometricum]
Unigene0000023	109.2	90.6	65.89	6.17	6.69	5.36	3.86615	1.67722e-75	At5g35370	TEY39820.1 hypothetical protein Saspl_044430 [Salvia splendens]
Unigene0033876	784.06	523.07	624.92	50.13	58.92	42.6	3.67132	2.14413e-75	CXE15	PIN20932.1 Arylacetamide deacetylase [Handroanthus impetiginosus]
Unigene0027186	15.85	18.45	16.45	91.61	81.3	85.44	-2.34785	7.33863e-75	SMT1	XP_022896605.1 cycloartenol-C-24-methyltransferase-like [Olea europaea var. sylvestris] [Olea europaea]
Unigene0028841	802.05	786.94	1188.15	83.14	59.56	79.45	3.64399	1.89901e-74	--	XP_031128386.1 glycine-rich cell wall structural protein-like [Ipomoea triloba]
Unigene0034330	1.16	1.89	2.57	50.69	55.07	45.85	-4.75365	2.04613e-74	NPY2	XP_011088062.1 BTB/POZ domain-containing protein NPY2 [Sesamum indicum]
Unigene0018985	121.96	141.45	114.2	19.65	20.5	25.51	2.52381	2.19493e-74	ZOX1	XP_011075344.1 zeatin O-glucosyltransferase-like [Sesamum indicum]
Unigene0019897	0.29	0.45	0.12	148.04	116.29	121.93	-8.81102	2.32795e-74	PR-1	XP_012841051.1 PREDICTED: pathogenesis-related protein PR-1-like isoform X1 [Erythranthe guttata]
Unigene0011619	178.89	204.6	149.47	28.14	32.9	32.51	2.51022	5.01694e-74	PLT5	XP_011092774.1 polyol transporter 5 [Sesamum indicum]
Unigene0029563	7.29	9.24	7.7	44.1	44.98	43.94	-2.45678	6.80215e-74	At1g16860	TEY66169.1 hypothetical protein Saspl_014974 [Salvia splendens]
Unigene0018624	0.73	0.36	0.93	29.66	25.9	28.98	-5.38721	1.35865e-73	SQD2	TYJ50956.1 hypothetical protein E1A91_A01G245700v1 [Gossypium mustelinum]
Unigene0008924	14.57	16.41	18.36	0.86	0.8	1.41	4.00645	2.44291e-73	--	-
Unigene0005021	18.46	11.33	12.3	280.82	266.69	251.86	-4.24731	2.59368e-73	UGT9	XP_012839050.1 PREDICTED: UDP-glycosyltransferase 74E2-like [Erythranthe guttata]
Unigene0015469	19	21.85	15.8	0.91	0.89	1.25	4.21519	3.60131e-73	URIII	PIN18530.1 Uricase (urate oxidase) [Handroanthus impetiginosus]
Unigene0029140	221.72	172.56	171.42	23.25	23.66	18.64	3.10937	9.46864e-73	JGB	XP_004238721.1 protein JINGUBANG [Solanum lycopersicum]
Unigene0005977	22.66	27.1	34.9	1.49	1.9	1.41	4.14057	1.2169e-72	At3g16560	PIN00327.1 Protein phosphatase 2C/pyruvate dehydrogenase (lipoamide) phosphatase [Handroanthus impetiginosus]
Unigene0019420	27.76	30.77	22.31	3.29	3.56	3.74	2.93237	1.24501e-72	LHW	XP_020552356.1 transcription factor LHW-like [Sesamum indicum]
Unigene0028884	370.44	353.73	389.84	122.18	118.43	112.05	1.65941	1.2637e-72	CPK19	XP_012841982.1 PREDICTED: calcium-dependent protein kinase-like [Erythranthe guttata]
Unigene0035803	29.04	29.69	29.54	8.73	8.37	9.05	1.75511	4.11478e-72	45512	PIN08237.1 hypothetical protein CDL12_19194 [Handroanthus impetiginosus]
Unigene0029132	49.35	63.52	40.52	646.18	610.2	819.4	-3.75838	5.58995e-72	NPF4.6	XP_012839832.1 PREDICTED: protein NRT1/ PTR FAMILY 4.5-like [Erythranthe guttata]
Unigene0030353	13.06	12.71	9.64	103.72	104.57	117.96	-3.20375	8.14966e-72	CIPK14	EYU27207.1 hypothetical protein MIMGU_mgv1a018841mg, partial [Erythranthe guttata]
Unigene0028613	8.43	7.16	4.11	253.51	223.8	184.69	-5.07056	8.61369e-72	MLP34	XP_011070720.1 kirola-like [Sesamum indicum]
Unigene0032347	68.18	63.95	64.48	9.5	9.48	6.71	2.93606	9.91112e-72	ACR8	XP_011081096.1 ACT domain-containing protein ACR8 [Sesamum indicum]
Unigene0026721	69.9	59.35	81.7	10.19	9.7	9.25	2.85583	1.03822e-71	PXN	XP_011084940.1 peroxisomal nicotinamide adenine dinucleotide carrier [Sesamum indicum]
Unigene0035558	65.31	91.07	71.84	7.57	10.31	7.98	3.14163	1.16448e-71	GGP5	XP_011087966.1 gamma-glutamyl peptidase 5 [Sesamum indicum]
Unigene0011898	0.38	0.89	1.22	38.58	34.52	36.66	-5.46206	1.71278e-71	LOX1.5	XP_011092040.1 probable linoleate 9S-lipoxygenase 5 isoform X4 [Sesamum indicum]
Unigene0035897	1.93	1.61	1	51.38	45.42	38.22	-4.89434	1.72344e-71	NPC3	XP_011086397.1 non-specific phospholipase C3 [Sesamum indicum]
Unigene0027636	1.06	0.48	0.66	125.7	129.58	106.25	-7.36047	1.89926e-71	--	-
Unigene0019001	5.44	3.84	1.97	286.02	276.52	196.84	-6.07683	2.86216e-71	--	-
Unigene0000876	36.06	32.59	33.87	4.12	5.71	4.67	2.82178	4.86902e-71	--	XP_011073937.1 uncharacterized protein LOC105158774 [Sesamum indicum]
Unigene0028034	171	151.32	103.49	10.35	11.48	12.33	3.63983	5.22422e-71	At5g53970	BAV57576.1 probable aminotransferase [Olea europaea]
Unigene0029381	636.73	832.79	471.72	44.23	48.44	58.93	3.67864	6.9413e-71	PP2B10	KAF3622319.1 putative pleiotropic drug resistance protein 1-like [Capsicum annuum]
Unigene0015907	36.71	33.87	24.9	2.15	1.88	2.06	3.97068	7.44623e-71	AIRP2	XP_012850245.1 PREDICTED: E3 ubiquitin-protein ligase RNF8 [Erythranthe guttata]
Unigene0008781	17.08	17.21	18.5	82.05	80.33	89.21	-2.25274	7.50892e-71	At3g47420	XP_011076352.1 putative glycerol-3-phosphate transporter 1 [Sesamum indicum]
Unigene0032570	1.6	0.81	2.17	87.71	63.7	68.72	-5.58686	9.18413e-71	COR413PM2	PIN12363.1 hypothetical protein CDL12_15016 [Handroanthus impetiginosus]
Unigene0025515	134.56	100.75	97.05	12.56	13.05	11.11	3.17811	1.12012e-70	BGLU40	KZV28363.1 beta-glucosidase 40-like [Dorcoceras hygrometricum]
Unigene0014023	0.11	0.21	0.62	112.69	96.44	67.33	-8.20019	1.14029e-70	FLS1	XP_009626189.1 PREDICTED: flavonol synthase/flavanone 3-hydroxylase-like [Nicotiana tomentosiformis]
Unigene0011207	3.45	4.13	3.71	38.69	36.32	29.95	-3.21672	1.52123e-70	WAK3	XP_022858489.1 putative wall-associated receptor kinase-like 16 isoform X2 [Olea europaea var. sylvestris] [Olea europaea]
Unigene0008296	0.22	0.24	0.09	14.7	18.55	19.6	-6.58633	1.67521e-70	TCP23	PIN23362.1 hypothetical protein CDL12_03948 [Handroanthus impetiginosus]
Unigene0014115	0.94	0.79	0.8	13.45	14.6	17.52	-4.17088	1.72038e-70	BAM1	XP_011092305.1 leucine-rich repeat receptor-like serine/threonine-protein kinase BAM3 [Sesamum indicum]
Unigene0031732	0.43	0.44	0.42	190.59	147.2	86.75	-8.36239	2.38995e-70	CAB7	XP_016515233.1 PREDICTED: chlorophyll a-b binding protein, chloroplastic [Nicotiana tabacum]
Unigene0031091	49.35	40.54	45.61	0.74	1.15	0.3	5.95122	2.46058e-70	DIR11	KZV23793.1 dirigent protein 21-like [Dorcoceras hygrometricum]
Unigene0024914	44.39	51.3	38.72	4.57	3.19	2.82	3.66723	3.73151e-70	MLO6	XP_011077127.1 MLO-like protein 12 [Sesamum indicum]
Unigene0001138	0.64	0.47	1.01	21.39	23.41	25.78	-5.05712	3.88379e-70	NPF6.3	TEY83469.1 solute carrier family 15 (peptide/histidine transporter), member 3/4 [Salvia splendens]
Unigene0007932	101.67	95.59	105.74	28.3	26.13	24.53	1.94012	1.14402e-69	--	GER49402.1 phosphatidylinositol-4-phosphate 5-kinase family protein [Striga asiatica]
Unigene0017840	1.45	3.41	2.16	109.1	120.74	74.35	-5.43736	1.14997e-69	XTH5	TEY87842.1 hypothetical protein Saspl_012213 [Salvia splendens]
Unigene0012506	5.06	4.68	5.67	49.8	47.24	61.81	-3.36573	1.17577e-69	NIP1	XP_012827587.1 PREDICTED: NEP1-interacting protein 2-like [Erythranthe guttata]
Unigene0021375	238.54	222.83	195.81	43.32	46.96	50.14	2.22654	1.4107e-69	At3g59070	PIN00874.1 hypothetical protein CDL12_26623 [Handroanthus impetiginosus]
Unigene0007013	21.26	17.33	18.64	0.61	0.99	0.51	4.76146	1.51424e-69	At1g80640	XP_011073359.1 probable receptor-like protein kinase At1g80640 [Sesamum indicum]
Unigene0030459	21.57	26.1	22.25	144.12	129.75	163.37	-2.64465	2.53025e-69	PHT2-1	PIN17388.1 Na+/Pi symporter [Handroanthus impetiginosus]
Unigene0035722	62.39	74.43	56.92	13.66	12.05	14.23	2.27822	4.79257e-69	EMB1444	PIN23111.1 hypothetical protein CDL12_04176 [Handroanthus impetiginosus]
Unigene0001532	49.15	50	51.11	16.61	17.74	16.99	1.54931	5.22923e-69	SIS3	TXG50293.1 hypothetical protein EZV62_022817 [Acer yangbiense]
Unigene0017453	63.42	61.86	48.54	6.89	7.91	5.88	3.07129	6.7877e-69	NAC056	XP_019154082.1 PREDICTED: NAC transcription factor 56-like [Ipomoea nil]
Unigene0000398	0.76	0.92	3.03	254.64	212.18	178.39	-7.0979	8.05542e-69	CAB21	XP_011096520.1 chlorophyll a-b binding protein 21, chloroplastic [Sesamum indicum]
Unigene0030551	19.83	18.55	22.79	1.35	1.95	2.06	3.51252	1.07198e-68	trpB2	XP_022853045.1 uncharacterized protein LOC111374581 [Olea europaea var. sylvestris] [Olea europaea]
Unigene0029261	4.21	4.98	4.56	108.99	84.51	77.17	-4.29903	2.37876e-68	PSAG	XP_011095644.1 photosystem I reaction center subunit V, chloroplastic [Sesamum indicum]
Unigene0028184	0.24	0.57	0.92	27.14	29.38	30.74	-5.65648	2.43417e-68	CYP80B1	PIM98070.1 Cytochrome P450 CYP2 subfamily [Handroanthus impetiginosus]
Unigene0001541	7.77	9.65	9.36	120.36	119.29	150.64	-3.86532	2.69973e-68	SUC1	TEY39827.1 solute carrier family 45, member 1/2/4 [Salvia splendens]
Unigene0025227	1.45	0.86	1.78	58.95	65.59	40.54	-5.33492	4.40045e-68	CHX18	XP_012834287.1 PREDICTED: cation/H(+) antiporter 18-like [Erythranthe guttata]
Unigene0020255	89.28	63.46	66.68	1.96	0.96	0.63	5.94973	5.50688e-68	--	-
Unigene0028935	1.61	2.48	2.14	25.87	24.02	22.25	-3.5335	6.47151e-68	PME44	XP_011078158.1 pectinesterase/pectinesterase inhibitor PPE8B [Sesamum indicum]
Unigene0014278	65.14	75.47	63.37	313.16	285.81	294.69	-2.1313	1.70728e-67	HIPP32	KZV30972.1 keratin, type I cytoskeletal 9 [Dorcoceras hygrometricum]
Unigene0023410	6.79	6.76	7.19	41.94	38.82	36.73	-2.50205	2.07211e-67	PHOX1	XP_011081512.1 HSP-interacting protein [Sesamum indicum]
Unigene0032077	79.13	91.04	64.36	9.92	10.78	12.38	2.82574	3.5249e-67	At5g19025	XP_020554751.1 uncharacterized protein At5g19025-like [Sesamum indicum]
Unigene0014421	45.62	55	27.59	1.02	0.49	0.68	5.87143	4.93942e-67	MPC4	PIN20229.1 hypothetical protein CDL12_07087 [Handroanthus impetiginosus]
Unigene0025546	35.01	36.06	43.85	7.26	6.78	5.98	2.52112	5.59843e-67	KRP3	XP_022896389.1 cyclin-dependent kinase inhibitor 7-like isoform X1 [Olea europaea var. sylvestris] [Olea europaea]
Unigene0030250	191.02	155.76	192.47	20.42	27.76	20.31	2.97699	1.0552e-66	--	XP_012846004.1 PREDICTED: uncharacterized protein LOC105966007 [Erythranthe guttata]
Unigene0001911	117.06	100.19	151.53	15.11	15.82	12.88	3.07343	1.37092e-66	At4g00750	XP_011091674.1 probable methyltransferase PMT15 [Sesamum indicum]
Unigene0031384	3.88	2.55	3.84	47.02	50.23	54.86	-3.88861	1.5494e-66	--	XP_011080492.1 uncharacterized protein LOC105163738 [Sesamum indicum]
Unigene0025700	72.7	53.74	52.99	659.93	590.2	722.83	-3.45887	2.21175e-66	PIP2-7	AOA52194.1 aquaporin PIP2;2 [Olea europaea]
Unigene0035257	37.25	29.07	27.25	1.74	1.51	1.46	4.31225	3.84191e-66	At3g15720	PIN07882.1 Polygalacturonase [Handroanthus impetiginosus]
Unigene0017507	73.36	87.7	68.22	18.83	17.43	19.28	2.04551	3.94792e-66	PUB19	PIM97552.1 Ubiquitin--protein ligase [Handroanthus impetiginosus]
Unigene0026077	43.17	41.9	36.25	8.2	7.26	8.51	2.33952	6.10293e-66	WRKY4	PIN00550.1 hypothetical protein CDL12_26946 [Handroanthus impetiginosus]
Unigene0033416	31.21	20.34	15.99	569.39	588.88	757.27	-4.82587	7.38582e-66	--	XP_011081926.1 uncharacterized protein LOC105164832 [Sesamum indicum]
Unigene0026635	1.72	1.19	2.55	45.85	43.96	39.63	-4.56724	1.07762e-65	CTL1	XP_011073914.1 chitinase-like protein 1 [Sesamum indicum]
Unigene0005768	48.4	39.53	36.35	5.28	4.51	3.84	3.18874	1.11152e-65	ROC3	XP_011070329.1 homeobox-leucine zipper protein HDG5 isoform X2 [Sesamum indicum]
Unigene0006940	51.85	47.86	45.99	14.18	14.68	14.84	1.7373	1.80306e-65	ATCSA-1	XP_011074354.1 DNA excision repair protein ERCC-8 [Sesamum indicum]
Unigene0004068	0.44	0.36	0.55	16.56	17.15	17.72	-5.25158	2.99386e-65	ERF010	KAB1220180.1 hypothetical protein CJ030_MR3G017004 [Morella rubra]
Unigene0021357	91.56	86.45	47.84	0.52	0.84	1.58	6.2634	3.26148e-65	HSD1	EYU23067.1 hypothetical protein MIMGU_mgv1a009247mg [Erythranthe guttata]
Unigene0026113	61.52	67.59	47.68	1.99	1.3	1	5.36492	3.85601e-65	--	-
Unigene0030432	2.26	2.2	4.86	105.04	102.29	127.93	-5.16881	6.16438e-65	--	-
Unigene0020143	13.53	18.3	16.99	94.06	104.18	99.46	-2.60832	6.24677e-65	At2g25060	XP_012840341.1 PREDICTED: cucumber peeling cupredoxin-like [Erythranthe guttata]
Unigene0019651	2.77	3.83	2.77	32.99	36.64	38.2	-3.52457	2.13359e-64	At2g44130	XP_012834433.1 PREDICTED: F-box/kelch-repeat protein At2g44130-like [Erythranthe guttata]
Unigene0017780	32.18	36.76	31.96	181.65	172.22	159.65	-2.34749	4.08067e-64	--	XP_011073022.1 protein SHOOT GRAVITROPISM 5 [Sesamum indicum]
Unigene0018086	40.86	45.98	63.28	6.01	5.13	4.56	3.25728	6.60439e-64	PMA4	PIN00818.1 Plasma membrane H+-transporting ATPase [Handroanthus impetiginosus]
Unigene0021782	6.34	2.99	4.68	143.62	146.68	112.43	-4.84528	8.09085e-64	RBL6	RWR87614.1 RHOMBOID-like protein 3 [Cinnamomum micranthum f. kanehirae]
Unigene0028887	0.57	0.65	0.56	14.41	17.72	16.54	-4.77308	9.55082e-64	TPS10	PIN03686.1 (R)-limonene synthase [Handroanthus impetiginosus]
Unigene0029887	5.71	5.93	4.72	42.72	42.73	43.18	-2.97498	1.00536e-63	KUA1	XP_011071772.1 transcription factor MYB1R1 [Sesamum indicum]
Unigene0018681	22.68	20.78	20.5	2.48	3.23	2.44	2.9723	1.02846e-63	XBAT33	PIM98728.1 26S proteasome regulatory complex, subunit PSMD10 [Handroanthus impetiginosus]
Unigene0012535	11.9	7.73	10.61	126.55	118.58	112.7	-3.56474	1.02858e-63	PILS7	TEY22686.1 uncharacterized protein Saspl_046782 [Salvia splendens]
Unigene0007738	10.48	10.62	8.77	54.7	58.89	63	-2.56363	2.10425e-63	COL11	PIN20509.1 hypothetical protein CDL12_06795 [Handroanthus impetiginosus]
Unigene0000651	25.09	20.1	16.36	1.42	1.38	1.65	3.78988	3.1498e-63	ALE2	XP_022879686.1 receptor-like serine/threonine-protein kinase ALE2 [Olea europaea var. sylvestris] [Olea europaea]
Unigene0033317	0.47	0.98	0.97	18.98	15.81	19.7	-4.49291	3.30984e-63	R1A-10	XP_012855653.1 PREDICTED: putative late blight resistance protein homolog R1A-10 [Erythranthe guttata]
Unigene0000759	22.24	19.31	29.74	1.07	0.53	0.65	4.9857	4.32519e-63	RAM2	XP_011073520.1 glycerol-3-phosphate 2-O-acyltransferase 6-like [Sesamum indicum]
Unigene0020256	43.78	34.55	33.72	1.17	0.81	0.32	5.60636	6.84407e-63	--	-
Unigene0028259	15.56	19.09	15.53	70.65	74.47	73.09	-2.12053	1.81702e-62	G6PD	XP_011100573.1 glucose-6-phosphate 1-dehydrogenase, chloroplastic [Sesamum indicum]
Unigene0024234	1.77	1.85	1.63	19.48	17.67	15.77	-3.33342	2.01986e-62	R1A-10	XP_012856172.1 PREDICTED: putative late blight resistance protein homolog R1B-16 [Erythranthe guttata]
Unigene0001276	25.87	29.54	24.17	5.85	5.33	6.23	2.19249	2.7324e-62	UXS5	GER57668.1 UDP-glucuronate decarboxylase [Striga asiatica]
Unigene0029728	0.59	0.57	0.69	36.67	27.66	32.01	-5.70254	2.86877e-62	HVA22I	XP_012828691.1 PREDICTED: putative HVA22-like protein g [Erythranthe guttata]
Unigene0031583	9.99	10.05	12.97	116.19	101.68	87.39	-3.20906	7.07314e-62	OFUT31	XP_011097478.1 uncharacterized protein At1g04910-like [Sesamum indicum]
Unigene0028828	0.31	0.63	0.28	13.52	11.52	11.26	-4.89502	8.53018e-62	ARF19	XP_020553508.1 auxin response factor 19 [Sesamum indicum]
Unigene0000901	3.92	3.6	4.11	31.96	34.59	38.35	-3.17309	8.59596e-62	Os04g0590900	PIM98112.1 Anaphase-promoting complex (APC), subunit 11 [Handroanthus impetiginosus]
Unigene0010991	61.95	75.31	79.6	325.69	346.97	324.38	-2.20089	9.66434e-62	At3g28850	PIN24498.1 Glutaredoxin-related protein [Handroanthus impetiginosus]
Unigene0018359	734.12	403.68	639.84	27.91	40.21	26.54	4.23106	1.06085e-61	CYP96A15	XP_011095704.1 alkane hydroxylase MAH1 [Sesamum indicum]
Unigene0014313	32.03	35.25	37.35	171.56	168.13	149.25	-2.22436	1.52531e-61	GAE6	XP_011084213.1 UDP-glucuronate 4-epimerase 6 [Sesamum indicum]
Unigene0027092	0.84	1.02	0.28	32.54	40.24	35.77	-5.66461	1.73304e-61	IAA1	XP_011081682.1 auxin-responsive protein IAA14 [Sesamum indicum]
Unigene0025833	17.2	16.9	22.08	0.18	0.27	0.1	6.67448	2.24401e-61	SHM1	XP_011073635.1 serine hydroxymethyltransferase, mitochondrial [Sesamum indicum]
Unigene0031667	12.14	15.15	14.21	1.65	1.76	2.25	2.87424	2.29958e-61	PVA22	PIN16045.1 VAMP-associated protein involved in inositol metabolism [Handroanthus impetiginosus]
Unigene0030726	0.11	0.09	0.09	51.76	60.6	51.86	-9.14536	2.52235e-61	CDS	XP_011080337.2 uncharacterized protein LOC105163620 [Sesamum indicum]
Unigene0009002	0.77	4.22	3.71	214.33	157.08	223.76	-6.09614	2.65834e-61	IAA14	XP_011073485.1 auxin-responsive protein IAA14 [Sesamum indicum]
Unigene0029506	1	1.16	1.45	21.46	27.21	27.03	-4.39022	2.83333e-61	RAV2	PIN09498.1 hypothetical protein CDL12_17918 [Handroanthus impetiginosus]
Unigene0028847	38.12	46.32	20.76	0.5	0.74	0.45	5.95997	3.35678e-61	At1g21400	XP_011101974.1 2-oxoisovalerate dehydrogenase subunit alpha 1, mitochondrial isoform X1 [Sesamum indicum]
Unigene0024376	11.28	11.59	15.01	91.06	82.09	83.98	-2.76299	3.69475e-61	HXK1	XP_022854714.1 hexokinase-1-like isoform X1 [Olea europaea var. sylvestris] [Olea europaea]
Unigene0030552	0.29	0.16	0.33	18.51	16.38	21.86	-6.185	3.85181e-61	--	XP_011087194.1 protein NUCLEAR FUSION DEFECTIVE 4 [Sesamum indicum]
Unigene0036595	1.48	1.5	1.76	86.36	40.76	78.05	-5.43579	4.74384e-61	PME61	XP_011084508.1 probable pectinesterase/pectinesterase inhibitor 61 [Sesamum indicum]
Unigene0013312	9.71	9.81	7.81	67.36	64.18	67.54	-2.86479	4.99656e-61	--	-
Unigene0012145	60.98	119.46	53.1	0.04	0.27	0.23	8.75649	5.35607e-61	COMT2	QAX90949.1 caffeic acid O-methyltransferase [Catalpa bungei]
Unigene0034411	166.12	122.82	104.87	5.27	7.29	9.61	4.15082	6.59995e-61	TPPJ	XP_011097592.1 probable trehalose-phosphate phosphatase J [Sesamum indicum]
Unigene0033966	25.52	29.6	22.68	5.89	6.04	5.45	2.16234	4.97155e-60	AHK4	XP_011070524.1 histidine kinase 4 [Sesamum indicum]
Unigene0000151	6.62	9.61	5.59	77.24	89.28	85.96	-3.53245	1.09002e-59	LON1	XP_011070270.1 lon protease homolog 2, peroxisomal [Sesamum indicum]
Unigene0026772	179.65	145.6	197.99	35.57	33.91	35.6	2.31598	1.14522e-59	DDB_G0286969	XP_011072601.1 LOW QUALITY PROTEIN: uncharacterized protein LOC105157816 [Sesamum indicum]
Unigene0004873	38.37	37.7	33.46	7.73	8.44	7.53	2.20837	1.65771e-59	--	XP_011070773.1 uncharacterized protein LOC105156360 [Sesamum indicum]
Unigene0026476	18.9	26.52	30.05	0.79	0.96	1.04	4.75757	2.08232e-59	ERF106	XP_012858579.1 PREDICTED: ethylene-responsive transcription factor ERF106 [Erythranthe guttata]
Unigene0031943	14.53	12.89	18.55	2.32	1.99	2.14	2.83332	2.60571e-59	FAB1B	XP_011093896.1 1-phosphatidylinositol-3-phosphate 5-kinase FAB1A [Sesamum indicum]
Unigene0005580	59.75	72.5	51.43	12.09	10.23	9.74	2.51835	4.34819e-59	PHYA1	XP_011092216.1 phytochrome A [Sesamum indicum]
Unigene0025369	19.1	15.91	18.32	1.32	1.12	1.28	3.84157	7.19445e-59	At5g58770	QIQ56025.1 cis-prenyl transferase 2 [Eremophila lucida]
Unigene0027073	66.56	88.93	40.39	3.84	4.06	3.87	4.05678	7.73469e-59	LKR/SDH	XP_011093904.1 alpha-aminoadipic semialdehyde synthase [Sesamum indicum]
Unigene0029003	19.91	17.03	21.09	3.41	3.01	2.55	2.69362	1.08815e-58	CYP71A1	XP_011094079.1 cytochrome P450 71A1-like [Sesamum indicum]
Unigene0031356	58.49	45.03	51.22	8.66	8.86	7.02	2.65664	1.78298e-58	PIP5K8	XP_011087754.1 phosphatidylinositol 4-phosphate 5-kinase 8 [Sesamum indicum]
Unigene0035961	44.09	59.6	43.17	6.76	8.17	8.39	2.6548	1.82308e-58	CPRF2	ANF04589.1 putative light inducible protein CPRF2 [Avicennia marina]
Unigene0025456	0.05	0.29	0.69	31.54	28.97	31.58	-6.48233	4.12976e-58	--	XP_011072599.1 uncharacterized protein LOC105157814 [Sesamum indicum]
Unigene0010811	23.48	24.69	28.35	4.86	4.59	5.45	2.36052	4.57391e-58	--	XP_012856527.1 PREDICTED: uncharacterized protein LOC105975837 [Erythranthe guttata]
Unigene0027338	30.57	34.8	28.21	5.37	6.81	6.26	2.34336	6.28847e-58	--	PIN24442.1 hypothetical protein CDL12_02793 [Handroanthus impetiginosus]
Unigene0027693	51.27	48.49	17.32	0.16	0.21	0.23	7.60832	1.13273e-57	BHLH63	XP_020551514.1 transcription factor bHLH63 isoform X1 [Sesamum indicum]
Unigene0019977	36.34	29.9	30.84	0.35	0.3	0.32	6.64505	1.36969e-57	--	XP_012857822.1 PREDICTED: mitogen-activated protein kinase kinase kinase 1 [Erythranthe guttata]
Unigene0011291	16.71	15.68	18.77	2.68	2.43	3.22	2.61863	1.3805e-57	--	XP_011086653.1 uncharacterized protein LOC105168320 [Sesamum indicum]
Unigene0023898	5.59	4.78	3.7	52.18	46.14	58.25	-3.47611	1.53169e-57	psmg2	XP_011092753.1 proteasome assembly chaperone 2 [Sesamum indicum]
Unigene0024672	123.4	100.41	132.37	20.9	17.94	15.24	2.71944	1.64367e-57	UDP-GALT1	GER40329.1 golgi nucleotide sugar transporter 5 [Striga asiatica]
Unigene0009880	101.25	95.52	95.89	23.82	27.98	29.25	1.85234	1.78012e-57	MEE23	XP_011096883.1 berberine bridge enzyme-like 15 [Sesamum indicum]
Unigene0012797	22.64	26.35	24.21	119.91	124.33	104.94	-2.25406	1.79312e-57	2ODD19	PIM99994.1 Iron/ascorbate family oxidoreductase [Handroanthus impetiginosus]
Unigene0029858	41.69	41.13	46.68	14.6	13.58	14.25	1.6098	1.79312e-57	GBA2	XP_011073769.1 non-lysosomal glucosylceramidase [Sesamum indicum]
Unigene0009286	37.47	34.92	40.57	178.15	161.77	164.26	-2.15813	2.50179e-57	SPS2	O04933.1 RecName: Full=Probable sucrose-phosphate synthase 2; AltName: Full=UDP-glucose-fructose-phosphate glucosyltransferase 2 [Craterostigma plantagineum]
Unigene0012101	16.94	16.18	26.49	408.48	267.97	366.02	-4.12831	2.90341e-57	At3g50520	XP_011099196.1 phosphoglycerate mutase-like protein 4 [Sesamum indicum]
Unigene0010019	4.3	4.48	4.65	50.89	42.89	41.13	-3.32847	3.02463e-57	GF14D	OVA13284.1 14-3-3 protein [Macleaya cordata]
Unigene0001647	1.43	2.03	2.86	55.66	41.35	66.31	-4.69163	3.1733e-57	PAE10	XP_011092213.1 pectin acetylesterase 12-like [Sesamum indicum]
Unigene0028589	0.03	0.06	0.04	29.22	28.63	18.96	-9.20664	3.71197e-57	--	GAY48204.1 hypothetical protein CUMW_110000, partial [Citrus unshiu]
Unigene0001363	29.32	24.83	19.68	2.79	3	2.37	3.17757	4.36721e-57	At5g50170	XP_011071944.1 C2 and GRAM domain-containing protein At5g50170 [Sesamum indicum]
Unigene0005869	0.56	0.62	1.49	49.63	39.27	61.67	-5.81745	4.5045e-57	srd5a3	XP_012836705.1 PREDICTED: steroid 5-alpha-reductase DET2-like [Erythranthe guttata]
Unigene0027138	668.72	659.36	577.97	170.68	176.65	144.55	1.95421	5.05552e-57	MSL8	PIN18013.1 putative mechanosensitive ion channel [Handroanthus impetiginosus]
Unigene0032849	0.93	2.25	2.56	151.51	75.1	112.22	-5.88337	5.74952e-57	PPO	XP_011082857.1 polyphenol oxidase I, chloroplastic-like [Sesamum indicum]
Unigene0014277	81.66	58.29	58.02	5.83	6.11	3.83	3.65003	5.80153e-57	--	TEY27613.1 hypothetical protein Saspl_031124 [Salvia splendens]
Unigene0026514	695.19	704.52	633.79	272.56	273.82	279.45	1.30005	6.1729e-57	Os04g0650000	XP_011069730.1 low-temperature-induced cysteine proteinase-like [Sesamum indicum]
Unigene0025959	21.47	18.5	18.82	1.77	1.81	2.77	3.21074	9.91575e-57	PCS1	XP_011094889.1 aspartic proteinase PCS1 [Sesamum indicum]
Unigene0010844	120.04	126.12	89.05	20.87	20.37	19.7	2.4596	1.11186e-56	At3g23880	XP_012833501.1 PREDICTED: putative F-box protein At3g17480 [Erythranthe guttata]
Unigene0002761	43.27	44.57	41.34	10.17	7.92	10.08	2.19715	1.68033e-56	LOV1	XP_011091064.1 putative late blight resistance protein homolog R1B-16 [Sesamum indicum]
Unigene0027403	287.84	290.63	230.22	73.22	67.2	69.16	1.94809	1.86351e-56	ABCC4	XP_011079676.1 ABC transporter C family member 4 [Sesamum indicum]
Unigene0016825	77.67	99.23	88.78	20.6	25.25	21.53	1.9793	1.95216e-56	NQR	XP_030966785.1 NADPH:quinone oxidoreductase-like [Quercus lobata]
Unigene0004772	6.2	6.77	6.35	34.19	32.81	34.69	-2.39601	2.2558e-56	FBX6	XP_011086814.1 F-box only protein 6 [Sesamum indicum]
Unigene0015772	4	6.21	4.56	40.91	41.93	38.89	-3.04294	2.30967e-56	UGT74F2	EYU17631.1 hypothetical protein MIMGU_mgv1a006064mg [Erythranthe guttata]
Unigene0034773	0.54	0.44	0.68	16.69	17.98	18.55	-5.00271	2.73392e-56	ZIP1	XP_011095751.1 zinc transporter 1-like [Sesamum indicum]
Unigene0002659	27.03	35.3	41.59	0.12	0.61	0.52	6.3774	3.27436e-56	--	-
Unigene0005506	11.05	5.92	13.72	275.55	247.95	253.47	-4.66202	3.42693e-56	ALDP	XP_011088487.1 fructose-bisphosphate aldolase 1, chloroplastic [Sesamum indicum]
Unigene0027676	3.4	2.33	3.08	43.42	38.6	49.14	-3.89604	3.52999e-56	--	XP_011071946.1 uncharacterized protein LOC105157276 [Sesamum indicum]
Unigene0033336	3.14	4.3	3.21	28.04	25.37	25.68	-2.89264	3.67106e-56	NPF8.1	XP_020550172.1 protein NRT1/ PTR FAMILY 8.1-like [Sesamum indicum]
Unigene0028869	91.62	88.47	85.85	19.25	20.47	25.22	2.03392	4.01613e-56	XLT2	XP_012855555.1 PREDICTED: xyloglucan galactosyltransferase KATAMARI1 homolog [Erythranthe guttata]
Unigene0024583	45.55	41.29	47.39	10.99	11.7	13.08	1.90789	1.02522e-55	SRF3	XP_011096273.1 protein STRUBBELIG-RECEPTOR FAMILY 1 [Sesamum indicum]
Unigene0027626	50.39	58.17	43.24	9.6	11.48	11.21	2.23301	1.53847e-55	DTX27	QBM79461.1 MATE31 [Rehmannia glutinosa]
Unigene0025703	285.25	295.09	328.44	103.81	107.78	117.54	1.46527	1.79887e-55	PIP2-1	PIN23375.1 Aquaporin (major intrinsic protein family) [Handroanthus impetiginosus]
Unigene0003153	0	0.28	0.1	38.94	35.63	35.97	-8.18435	2.97826e-55	IDD14	KZV46793.1 protein SHOOT GRAVITROPISM 5-like [Dorcoceras hygrometricum]
Unigene0000168	0.27	0.61	0.28	10.45	8.9	9.26	-4.62432	3.15165e-55	CNGC2	XP_011085713.1 cyclic nucleotide-gated ion channel 2-like [Sesamum indicum]
Unigene0012118	3.54	4.27	5.32	33.06	32.24	36.67	-2.95721	6.42495e-55	BHLH76	XP_011077884.1 transcription factor bHLH49 [Sesamum indicum]
Unigene0025800	121.96	178.09	107.78	15.79	18.47	15.87	3.02422	7.89275e-55	LTPG1	XP_011086802.1 non-specific lipid transfer protein GPI-anchored 1 [Sesamum indicum]
Unigene0011701	455.71	439.23	449.25	172.93	190.17	176.74	1.31613	8.22516e-55	--	PIN11616.1 Leucine-rich repeat (LRR) protein associated with apoptosis in muscle tissue [Handroanthus impetiginosus]
Unigene0001145	1.35	0.77	0.38	42.71	40.53	43.87	-5.66801	8.72193e-55	--	-
Unigene0034800	7.02	9.11	5.21	75.15	70.71	79.62	-3.40137	9.54766e-55	NIK3	TEY18656.1 somatic embryogenesis receptor kinase 4 [Salvia splendens]
Unigene0005456	58.01	60.76	75.63	12.89	13.15	14.58	2.25877	1.47669e-54	--	-
Unigene0022488	42.23	34.51	39.38	6.34	5.28	4.48	2.85048	1.77624e-54	--	XP_021999597.1 protein SPEAR4 [Helianthus annuus]
Unigene0004316	221.25	274.75	436.66	26.95	30.07	28.22	3.45175	2.43864e-54	UGD2	GER49340.1 UDP-glucose 6-dehydrogenase family protein [Striga asiatica]
Unigene0024485	140.66	130.58	76.43	7.55	8.45	10.48	3.71474	2.48046e-54	RLK7	XP_011074301.1 receptor-like protein kinase HAIKU2 [Sesamum indicum]
Unigene0017384	54.71	84.27	46.03	3.34	3.29	4.68	4.03193	3.39727e-54	ALS3	XP_011077408.1 protein ALUMINUM SENSITIVE 3 [Sesamum indicum]
Unigene0000513	2.18	3.77	4.08	43.15	39.07	46.01	-3.67634	3.94297e-54	AAP3	KZV23195.1 hypothetical protein F511_05034 [Dorcoceras hygrometricum]
Unigene0021011	7.27	9.67	6.68	1.43	1.24	1.28	2.58008	4.76551e-54	--	RWR91636.1 hypothetical protein CKAN_02080200 [Cinnamomum micranthum f. kanehirae]
Unigene0013425	6.27	7.79	7.29	32.81	30.89	33.49	-2.18657	4.85709e-54	At4g22990	XP_011081042.1 SPX domain-containing membrane protein At4g22990 isoform X1 [Sesamum indicum]
Unigene0002618	12.56	13.95	16.44	90.28	84.33	109.68	-2.72663	5.15199e-54	MBD2	XP_011094058.1 methyl-CpG-binding domain-containing protein 2 [Sesamum indicum]
Unigene0023151	0.54	0.66	0.3	12.88	12.06	13.37	-4.67469	6.77677e-54	CKX7	BAM74649.1 cytokinin oxidase/dehydrogenase [Torenia fournieri]
Unigene0003478	26.72	30.07	37.72	4.42	3.51	2.94	3.12012	7.94209e-54	SKU5	XP_011101121.1 monocopper oxidase-like protein SKS1 [Sesamum indicum]
Unigene0036332	20.81	23.33	20.3	92.02	85.78	95.12	-2.08245	8.08034e-54	IAA12	GER29660.1 auxin-responsive protein [Striga asiatica]
Unigene0018283	1.04	2.08	1.9	24.15	24	21.36	-3.79146	8.08034e-54	FER	PIN27183.1 Serine/threonine protein kinase [Handroanthus impetiginosus]
Unigene0022364	0.72	1.5	0.73	22.64	28.5	27.21	-4.73115	1.12354e-53	OFP3	XP_011080730.1 transcription repressor OFP1 [Sesamum indicum]
Unigene0000126	0.96	1.11	1.48	14.95	13.01	18.07	-3.69668	1.78067e-53	IAA7	BAQ19356.1 putative gag-pol polyprotein [Torenia fournieri]
Unigene0019940	199.47	312.26	152.88	17.42	17.59	15.13	3.72847	2.31151e-53	SAG21	PIM98400.1 hypothetical protein CDL12_29125 [Handroanthus impetiginosus]
Unigene0028358	127.47	84.11	115.97	16.63	15.17	14.34	2.82763	3.53789e-53	FAR3	RDX92870.1 hypothetical protein CR513_24942, partial [Mucuna pruriens]
Unigene0013091	38.82	27.37	48.16	3.25	3	3.04	3.62163	4.07253e-53	--	PIN26762.1 hypothetical protein CDL12_00481 [Handroanthus impetiginosus]
Unigene0003517	0.3	0.37	0.29	8.5	7.87	7.45	-4.633	4.35186e-53	At2g25790	PIN24709.1 Serine/threonine protein kinase [Handroanthus impetiginosus]
Unigene0000682	0.1	0.08	0.42	27.8	19.17	25.1	-6.90829	5.57169e-53	RECQL1	XP_011087454.1 ATP-dependent DNA helicase Q-like 1 isoform X1 [Sesamum indicum]
Unigene0008683	1.22	0.74	0.94	21.65	16.32	18.77	-4.29024	7.99285e-53	--	PIN17781.1 hypothetical protein CDL12_09556 [Handroanthus impetiginosus]
Unigene0014325	115.5	146.42	107.97	28.29	32.48	30.33	2.02157	8.15333e-53	--	XP_020551042.1 uncharacterized protein LOC105160920 [Sesamum indicum]
Unigene0028243	104.68	124.75	100.19	6.62	9.14	13.26	3.50568	9.3951e-53	--	-
Unigene0022748	0.86	1.21	1.12	16.57	13.73	17.29	-3.89903	1.21188e-52	RCA1	TEY39486.1 hypothetical protein Saspl_031917 [Salvia splendens]
Unigene0013905	0.69	0.24	0.45	22.5	19.4	24.9	-5.59711	1.21653e-52	BLT	KZV22444.1 protein BRANCHLESS TRICHOME [Dorcoceras hygrometricum]
Unigene0017858	6.25	8.54	7.29	38.29	40.74	37.69	-2.40224	1.40151e-52	BSK2	XP_011093461.1 probable serine/threonine-protein kinase At4g35230 [Sesamum indicum]
Unigene0023387	135.96	153.19	101.42	6.88	5.12	11.1	4.07962	1.53674e-52	FL	ALP48589.1 flavonol synthase [Erythranthe cardinalis]
Unigene0015335	17.78	14.81	23.68	1.1	1.33	0.81	4.1183	1.62687e-52	CYP71B10	PSR86236.1 4-hydroxyphenylacetaldehyde oxime monooxygenase [Actinidia chinensis var. chinensis] [Actinidia chinensis]
Unigene0029414	486.84	503.79	480.45	239.6	229.37	236.08	1.06108	1.77817e-52	TRXH	GER35520.1 thioredoxin [Striga asiatica]
Unigene0033637	0.39	0.72	1.07	62.96	45.17	48.09	-6.16311	2.98266e-52	CAB21	XP_012449956.1 PREDICTED: chlorophyll a-b binding protein of LHCII type 1-like [Gossypium raimondii]
Unigene0033824	71.63	87.97	90.55	21.07	23.65	25.74	1.82792	3.82049e-52	SAM1	GER45449.1 S-adenosylmethionine synthase [Striga asiatica]
Unigene0002016	209.04	227.24	251.56	76.49	84.36	82.84	1.49703	3.9e-52	--	TEY53782.1 hypothetical protein Saspl_019842 [Salvia splendens]
Unigene0032217	0.49	0.6	0.38	22.68	18.92	29.88	-5.60365	3.95932e-52	GLN2	XP_011090823.1 glutamine synthetase leaf isozyme, chloroplastic [Sesamum indicum]
Unigene0001137	0.26	0.41	0.13	29.01	44.29	23.38	-6.91707	6.48928e-52	NPF6.2	XP_011093557.1 protein NRT1/ PTR FAMILY 6.2 [Sesamum indicum]
Unigene0001744	0.14	0.17	0.38	23.18	20.77	21.78	-6.57381	6.7521e-52	--	XP_011070244.1 uncharacterized protein LOC105155953 [Sesamum indicum]
Unigene0004957	1.96	2.2	3.15	23.27	22.62	22.41	-3.22394	8.75921e-52	HMA4	PIN16018.1 Cation transport ATPase [Handroanthus impetiginosus]
Unigene0014444	11.45	14.63	11.52	0.08	0.1	0.2	6.62859	1.26317e-51	PII-2	GER31916.1 leucine-rich repeat receptor-like protein kinase family protein, partial [Striga asiatica]
Unigene0035841	0.85	0.73	1.4	18.8	19.77	16.19	-4.19974	1.53388e-51	CSLE1	XP_011097753.1 cellulose synthase-like protein E1 [Sesamum indicum]
Unigene0036197	60.9	64.29	63.21	192.96	180.17	189.38	-1.57808	1.58338e-51	CIPK23	XP_011096616.1 CBL-interacting protein kinase 23 [Sesamum indicum]
Unigene0036181	46.1	93.02	81.43	0.8	1.33	1.9	5.77418	1.89202e-51	SAUR41	PIN19533.1 hypothetical protein CDL12_07789 [Handroanthus impetiginosus]
Unigene0020013	31.46	30.78	33.39	6.01	5.32	6.43	2.42883	3.48486e-51	RHA2A	XP_020552260.1 E3 ubiquitin-protein ligase RNF13-like [Sesamum indicum]
Unigene0031944	24.49	23.04	20.24	1.92	2.32	1.14	3.65497	4.08607e-51	MHX	EYU42222.1 hypothetical protein MIMGU_mgv1a004654mg [Erythranthe guttata]
Unigene0024124	0.49	0.89	1.74	121.94	67.35	95.96	-6.51454	6.2056e-51	UGT29	XP_011090911.1 beta-D-glucosyl crocetin beta-1,6-glucosyltransferase-like [Sesamum indicum]
Unigene0023014	28.01	48.73	34.67	2.49	3.51	3.42	3.56401	8.65854e-51	CSE	XP_011084365.1 caffeoylshikimate esterase [Sesamum indicum]
Unigene0019442	0.33	0.81	0.25	15.39	15.78	18.57	-5.16125	1.18112e-50	BHLH122	XP_027077343.1 transcription factor bHLH130-like isoform X1 [Coffea arabica]
Unigene0018791	20.31	19.88	17.58	115.6	101.73	92.98	-2.42532	1.51419e-50	LON2	XP_011070270.1 lon protease homolog 2, peroxisomal [Sesamum indicum]
Unigene0027449	18.94	20.66	19.92	1.82	2.68	3.15	2.95984	1.56712e-50	ROPGEF12	XP_012852675.1 PREDICTED: rho guanine nucleotide exchange factor 8-like [Erythranthe guttata]
Unigene0024017	0.59	0.84	1.32	61.16	50.91	40.7	-5.79579	1.93206e-50	PATL5	PIN11419.1 Phosphatidylinositol transfer protein SEC14 [Handroanthus impetiginosus]
Unigene0000907	25.83	26.29	23.28	3.75	3.31	3.5	2.83595	3.04399e-50	--	-
Unigene0011971	19.13	19.87	14.88	3.03	2.59	2.89	2.66252	4.07656e-50	CRK	XP_011085503.1 CDPK-related protein kinase [Sesamum indicum]
Unigene0031507	55.01	45.75	113.26	2524.31	2244.59	1919.82	-4.96591	4.60839e-50	--	-
Unigene0016447	192.2	165.48	190.13	59.61	62.03	59.74	1.59466	5.43685e-50	ARF16	XP_011089288.1 auxin response factor 18 isoform X2 [Sesamum indicum]
Unigene0028004	4.71	5.23	6.65	39.15	36.49	35.47	-2.7436	6.39752e-50	At1g54610	XP_011083518.1 probable serine/threonine-protein kinase At1g54610 [Sesamum indicum]
Unigene0023039	0.46	0.39	0.42	16.57	15.19	15.34	-5.21283	7.99592e-50	--	PIN19520.1 hypothetical protein CDL12_07794 [Handroanthus impetiginosus]
Unigene0026216	18.27	18.88	19.3	3.13	3.81	3.35	2.45573	8.46366e-50	BCCP1	AIU99492.1 Biotin Carboxyl Carrier Protein [Salvia miltiorrhiza]
Unigene0029699	47.97	54.6	47.62	12.45	16	14.18	1.81685	1.64278e-49	HSFB1	PIN10102.1 hypothetical protein CDL12_17319 [Handroanthus impetiginosus]
Unigene0023617	424.87	331.8	333.29	56.27	57.84	76.15	2.51823	2.40881e-49	SCPL34	XP_011075284.1 serine carboxypeptidase-like 34 [Sesamum indicum]
Unigene0000037	1931.45	1751.63	1850.72	710.97	744.86	757.92	1.32178	3.05399e-49	GASA10	XP_011097848.1 fluoride export protein 2 [Sesamum indicum]
Unigene0010803	34.97	27.9	18.1	0.11	0.51	0.28	6.49132	4.07258e-49	GA20OX1	BAJ65441.1 gibberellin 20-oxidase [Torenia fournieri]
Unigene0028936	529.4	573.32	497.35	59.63	72.35	102.79	2.76882	4.13249e-49	ERF061	PIN21009.1 hypothetical protein CDL12_06299 [Handroanthus impetiginosus]
Unigene0026303	0.98	0.47	0.44	17.84	16.74	20.93	-4.87629	4.37066e-49	OFUT20	XP_011087180.1 uncharacterized protein At1g04910 [Sesamum indicum]
Unigene0018458	1.1	2.77	1.34	33.61	38.23	39.4	-4.41625	4.66407e-49	AS	PIN26543.1 UDP-glucuronosyl and UDP-glucosyl transferase [Handroanthus impetiginosus]
Unigene0029701	67.27	74.48	92.81	13.4	9.8	13.76	2.66592	9.27386e-49	--	GER53042.1 hypothetical protein STAS_30534 [Striga asiatica]
Unigene0022400	62.59	58.05	35.54	0.62	0.1	0.43	7.08543	9.80608e-49	--	-
Unigene0014995	8.7	7.59	9.59	47.21	45.92	46.77	-2.43449	1.17553e-48	DOF3.1	PIN11758.1 hypothetical protein CDL12_15624 [Handroanthus impetiginosus]
Unigene0024972	84.91	62.59	83.41	15.26	15.11	13.41	2.39899	1.64211e-48	IRKI	XP_011081115.1 IRK-interacting protein [Sesamum indicum]
Unigene0001782	19.16	21.63	17.14	4.32	4.65	4.79	2.07383	1.6865e-48	--	PIN01734.1 hypothetical protein CDL12_25759 [Handroanthus impetiginosus]
Unigene0005032	7.57	6.82	6.17	36.86	34.07	36.61	-2.38696	2.08188e-48	ARF18	TMW97947.1 hypothetical protein EJD97_004749 [Solanum chilense]
Unigene0031320	20.94	19.91	22.02	86.93	91.89	97.75	-2.1372	2.40504e-48	PRA1F3	XP_031286163.1 PRA1 family protein F3-like [Pistacia vera]
Unigene0004301	10.57	13.08	9.38	55.26	60.03	59.66	-2.40509	2.57372e-48	--	XP_022896757.1 cinnamoyl-CoA reductase-like SNL6 [Olea europaea var. sylvestris] [Olea europaea]
Unigene0025804	5.74	7.82	7.57	40.6	40.46	42.38	-2.54645	2.62055e-48	At4g28100	PIN01319.1 hypothetical protein CDL12_26171 [Handroanthus impetiginosus]
Unigene0033789	24.66	20.45	35.08	2.75	2.44	2.75	3.33621	2.79246e-48	At2g42960	PIN25624.1 Serine/threonine protein kinase [Handroanthus impetiginosus]
Unigene0035883	25.55	30.55	39.02	255.38	209.88	271.73	-2.95382	2.82836e-48	INV*DC4	XP_011076337.1 beta-fructofuranosidase, soluble isoenzyme I-like [Sesamum indicum]
Unigene0008623	6.58	9.4	9.25	57.62	50.26	57.2	-2.70995	3.39733e-48	ATHB-54	XP_011087214.1 homeobox-leucine zipper protein HAT5 [Sesamum indicum]
Unigene0014179	263.67	256.88	310.51	69.19	78.16	59.39	2.00714	3.53471e-48	SBT1.5	XP_012833831.1 PREDICTED: subtilisin-like protease SBT1.7 [Erythranthe guttata]
Unigene0014626	266.92	278.31	260.5	93.82	92.75	111.73	1.43353	4.30519e-48	UTR4	OIV98751.1 hypothetical protein TanjilG_24922 [Lupinus angustifolius]
Unigene0028565	587.78	921.49	803.07	150.9	134.12	171.05	2.34203	4.74346e-48	Os07g0662500	NP_001274914.1 elongation factor 1-beta 2-like [Solanum tuberosum]
Unigene0030479	0.75	0.49	0.61	17.69	23.37	11.8	-4.83658	4.95084e-48	GIP	KYP69041.1 Retrovirus-related Pol polyprotein from transposon TNT 1-94 [Cajanus cajan]
Unigene0029384	64.16	65.01	66.34	29.24	29.4	26.73	1.19544	5.16053e-48	At5g10370	PIN24607.1 DEAH-box RNA helicase [Handroanthus impetiginosus]
Unigene0028610	5.99	8.29	8.6	86.23	61.88	67.23	-3.23446	5.18318e-48	PCR2	OMO99789.1 hypothetical protein COLO4_13084 [Corchorus olitorius]
Unigene0031097	16.66	18.44	16.59	4.46	5.09	5.11	1.818	6.42175e-48	G6PD2	PIN02853.1 Glucose-6-phosphate 1-dehydrogenase [Handroanthus impetiginosus]
Unigene0033465	49.87	52.07	49.77	141.11	136.69	141.52	-1.46674	7.88493e-48	BLH1	PIN14477.1 Transcription factor MEIS1 [Handroanthus impetiginosus]
Unigene0003428	2.54	3.83	3.34	26.75	25.04	29.96	-3.07368	9.2485e-48	ACPD	BAA07681.1 stearoyl-acyl carrier protein desaturase [Sesamum indicum]
Unigene0029840	0.22	0.42	0.22	29.51	18.12	32.1	-6.53464	1.2614e-47	GAPB	KZV40842.1 glyceraldehyde-3-phosphate dehydrogenase B, chloroplastic-like [Dorcoceras hygrometricum]
Unigene0028415	28.58	29.81	20.28	0.47	0.7	0.9	5.24811	1.54498e-47	--	XP_012830294.1 PREDICTED: uncharacterized protein LOC105951414 [Erythranthe guttata]
Unigene0029233	73.9	63.81	104.06	10.25	6.93	9.5	3.1798	1.81798e-47	OPT5	PIN09466.1 Sexual differentiation process protein ISP4 [Handroanthus impetiginosus]
Unigene0005148	18.96	16.63	13.84	2.18	2.34	1.55	3.02562	2.33542e-47	ABCG15	GER40781.1 ABC transporter G family member [Striga asiatica]
Unigene0024045	19.56	22.3	18.78	6.94	6.86	6.7	1.56465	2.99469e-47	FBPban1	XP_011101507.1 fructose-1,6-bisphosphatase, cytosolic [Sesamum indicum]
Unigene0029759	47.15	37.81	52.65	9.96	10.35	9.26	2.21838	3.50334e-47	DGK2	PIN24251.1 Diacylglycerol kinase [Handroanthus impetiginosus]
Unigene0014077	53.72	49.45	45.58	11.33	11.4	14.23	2.00885	3.6955e-47	UGT90A1	XP_011071831.1 UDP-glycosyltransferase 90A1-like [Sesamum indicum]
Unigene0024548	0.92	0.15	0.56	73.78	55.47	36.89	-6.67138	4.03935e-47	NIP2-1	XP_011098628.1 aquaporin NIP2-1-like isoform X2 [Sesamum indicum]
Unigene0000413	6.63	2.25	3.1	2208.94	1991.82	1153.64	-8.80395	4.67035e-47	--	XP_020552130.1 organ-specific protein P4-like [Sesamum indicum]
Unigene0018543	0.19	0.34	0.68	15.5	17.87	14.15	-5.29546	4.6704e-47	At1g62810	PIN02817.1 Copper amine oxidase [Handroanthus impetiginosus]
Unigene0012384	23.17	22	15.24	2.66	2.8	2.13	2.99262	5.29664e-47	KIPK1	PIN25409.1 putative serine/threonine protein kinase [Handroanthus impetiginosus]
Unigene0006689	0.32	0.39	0.43	35.79	25.02	27.02	-6.26761	5.47046e-47	SGR9	PIN08042.1 Anaphase-promoting complex (APC), subunit 11 [Handroanthus impetiginosus]
Unigene0029760	1.03	1.35	1.26	30.41	23.96	28.79	-4.51388	6.17788e-47	--	XP_011087216.1 uncharacterized protein LOC105168768 [Sesamum indicum]
Unigene0028174	0.51	1.23	0.57	16.86	19.87	18.06	-4.56795	6.79774e-47	CYP704B1	PIM98252.1 Cytochrome P450 CYP4/CYP19/CYP26 subfamily [Handroanthus impetiginosus]
Unigene0011720	2.36	3.02	3.26	25.43	22.13	22.9	-3.0277	9.79208e-47	--	-
Unigene0013806	79.83	89.16	79.26	39.88	39.26	40.72	1.05044	1.11429e-46	RZFP34	PIM99878.1 Zn-finger protein [Handroanthus impetiginosus]
Unigene0020719	107.78	111.22	175.31	15.89	19.97	16.03	2.9258	1.19871e-46	CYP82A3	XP_011099742.1 cytochrome P450 CYP82D47-like [Sesamum indicum]
Unigene0002839	4.03	2.57	3.69	34.57	31.54	39.95	-3.36557	1.25359e-46	--	XP_011092401.1 uncharacterized protein LOC105172591 isoform X1 [Sesamum indicum]
Unigene0002183	0.2	0.39	0.2	13.93	14.77	17.12	-5.85798	1.39522e-46	ZOX1	EYU20762.1 hypothetical protein MIMGU_mgv1a027163mg, partial [Erythranthe guttata]
Unigene0028340	8.44	14.19	5.23	225.1	200.34	225.9	-4.54714	1.66973e-46	PSBO	XP_011085527.1 oxygen-evolving enhancer protein 1, chloroplastic-like [Sesamum indicum]
Unigene0023914	239.43	205.35	242.95	71.95	75.12	67.03	1.68356	1.9474e-46	B3GALT7	PIN15854.1 Galactosyltransferase [Handroanthus impetiginosus]
Unigene0027710	24.64	18.79	23.1	3.47	2.79	2.71	2.89083	2.13025e-46	--	GER50629.1 hypothetical protein STAS_27949 [Striga asiatica]
Unigene0035983	14.94	10.97	15.09	1.11	1.04	1.27	3.58356	2.20224e-46	CEL1	PIN21742.1 Cellulase [Handroanthus impetiginosus]
Unigene0024168	32.8	45.5	41.6	10.82	9.95	11.64	1.88732	3.26684e-46	--	XP_011079861.2 LOW QUALITY PROTEIN: protein TIME FOR COFFEE [Sesamum indicum]
Unigene0006656	3.02	3.16	3.35	21.83	19.65	24.59	-2.79345	3.90824e-46	TMN3	XP_011099917.1 transmembrane 9 superfamily member 3 [Sesamum indicum]
Unigene0026692	66.55	61.45	66.38	25.16	25.35	24.47	1.3743	4.73236e-46	TMN7	TEY74018.1 transmembrane 9 superfamily member 2/4 [Salvia splendens]
Unigene0035954	14.17	13.91	12.9	92.81	88.65	70.86	-2.62226	5.30769e-46	PSRP1	XP_011075893.1 ribosome-binding factor PSRP1, chloroplastic [Sesamum indicum]
Unigene0021023	81.47	80.49	78.29	31.94	33.07	35.3	1.26007	6.20145e-46	RTNLB2	XP_019260314.1 PREDICTED: reticulon-like protein B2 [Nicotiana attenuata]
Unigene0022260	0	0.19	0.13	56.23	53.36	65.88	-9.09894	8.0802e-46	At5g39865	XP_011077914.1 uncharacterized protein LOC105161798 [Sesamum indicum]
Unigene0018321	0.75	0.46	1.17	23.06	16.87	21.41	-4.68779	8.83626e-46	GALS1	XP_011083362.2 galactan beta-1,4-galactosyltransferase GALS1 [Sesamum indicum]
Unigene0026001	118.38	113.05	104.97	45.15	42.73	43.4	1.35753	1.13947e-45	LOX6	XP_011086753.1 lipoxygenase 6, chloroplastic [Sesamum indicum]
Unigene0026855	0.97	0.81	1.19	18.19	16.3	11.83	-3.9631	1.22369e-45	SRR1	PIM98676.1 hypothetical protein CDL12_28839 [Handroanthus impetiginosus]
Unigene0014806	3.26	4.01	4.25	17.46	17.14	16.97	-2.16239	1.2751e-45	ALA8	XP_011098470.1 probable phospholipid-transporting ATPase 8 [Sesamum indicum]
Unigene0001300	3.97	5.02	4.47	22.82	22.48	20.28	-2.28458	1.31819e-45	RECQL3	XP_020549636.1 ATP-dependent DNA helicase Q-like 3 isoform X1 [Sesamum indicum]
Unigene0027508	51.83	64.2	58.23	13.28	13.87	17.79	1.95517	1.39461e-45	SRO5	XP_011101326.1 probable inactive poly [ADP-ribose] polymerase SRO5 [Sesamum indicum]
Unigene0021800	13.08	17.91	17.79	0.83	0.86	1.59	3.89452	1.59585e-45	UGT75C1	XP_022874990.1 crocetin glucosyltransferase, chloroplastic-like [Olea europaea var. sylvestris] [Olea europaea]
Unigene0010543	8.52	10.05	9.08	59.19	56.09	48.1	-2.56288	1.90771e-45	LBD39	XP_011099355.1 LOB domain-containing protein 37-like [Sesamum indicum]
Unigene0034998	23.31	25.18	25.1	7.74	7.06	7.55	1.71923	1.90771e-45	tlcd4-a	XP_012829769.1 PREDICTED: transmembrane protein 56-B [Erythranthe guttata]
Unigene0033964	26.76	35.75	48.67	3.59	4.07	3.83	3.27445	2.04065e-45	WRKY28	PWA39031.1 WRKY domain-containing protein [Artemisia annua]
Unigene0024821	19.58	17.05	20.97	1.72	1.71	2.37	3.31194	3.76035e-45	OFP13	XP_011076850.1 transcription repressor OFP13 [Sesamum indicum]
Unigene0031638	2.02	0.92	1.16	26.69	29.94	27.19	-4.3536	4.09515e-45	--	XP_027089730.1 transmembrane protein 136-like [Coffea arabica]
Unigene0028909	37.92	43.61	36.81	13.02	13.54	11.76	1.62677	4.32954e-45	--	XP_011070438.1 uncharacterized protein LOC105156095 isoform X1 [Sesamum indicum]
Unigene0025651	32.08	30.03	31.93	165.74	129.63	162.07	-2.28224	6.81807e-45	ARF4	XP_011089884.1 auxin response factor 4 isoform X2 [Sesamum indicum]
Unigene0025828	109.36	112.36	105.66	47.42	49.51	53.3	1.12379	7.23347e-45	--	PIN10108.1 hypothetical protein CDL12_17308 [Handroanthus impetiginosus]
Unigene0000388	22.9	27.1	9.99	0.56	0.55	0.41	5.30258	7.53169e-45	--	XP_019173282.1 PREDICTED: protein FAR-RED IMPAIRED RESPONSE 1-like [Ipomoea nil]
Unigene0032379	240.16	273.64	304.32	68.88	70.93	89.21	1.83684	7.76922e-45	--	XP_011082302.1 B2 protein [Sesamum indicum]
Unigene0033965	29.61	48.07	51.87	3.28	2.91	4.04	3.66263	7.90108e-45	WRKY48	XP_011100744.2 probable WRKY transcription factor 48, partial [Sesamum indicum]
Unigene0036613	92.69	65.67	103.33	4.39	8.36	4.49	3.92403	1.20508e-44	SWEET1	PIN16575.1 Multitransmembrane protein [Handroanthus impetiginosus]
Unigene0032507	45.24	45.38	61.52	11.64	9.72	9.01	2.32468	1.57186e-44	NPC1	XP_020547514.1 Niemann-Pick C1 protein [Sesamum indicum]
Unigene0032754	0.12	0.45	0.21	33.97	25.26	34.84	-6.91412	1.63013e-44	PSBS	TMW97936.1 hypothetical protein EJD97_004766 [Solanum chilense]
Unigene0032122	32.36	35.84	65.47	0.6	0.68	0.25	6.449	1.78473e-44	PP2C51	PIN20518.1 Serine/threonine protein phosphatase [Handroanthus impetiginosus]
Unigene0011111	5.31	5.85	5.84	25.03	25.11	24.29	-2.13035	1.94894e-44	USP	PIN16492.1 UDP-N-acetylglucosamine pyrophosphorylase [Handroanthus impetiginosus]
Unigene0031046	149.96	166.9	73.97	3.12	7.06	4.22	4.7624	1.96729e-44	--	XP_022873148.1 uncharacterized protein LOC111392110 [Olea europaea var. sylvestris] [Olea europaea]
Unigene0017080	3.96	4.43	4.51	19.93	19.72	21.24	-2.23883	2.3382e-44	TCP7	KZV34788.1 hypothetical protein F511_00690 [Dorcoceras hygrometricum]
Unigene0029993	0.15	0.03	0.31	9.47	9	9.6	-5.8401	2.84086e-44	R1B-16	XP_011072143.1 putative late blight resistance protein homolog R1A-10 [Sesamum indicum]
Unigene0006852	275.89	235.01	128.81	16.01	13.24	14.23	3.87899	3.26295e-44	--	PIM98958.1 hypothetical protein CDL12_28550 [Handroanthus impetiginosus]
Unigene0025887	334.18	189.86	263.65	30.46	30.67	36.19	3.01682	3.55441e-44	LSI3	XP_011076136.1 putative transporter arsB [Sesamum indicum]
Unigene0031300	22.95	25.63	27.53	8.05	7.86	8.17	1.66025	3.70361e-44	RHM1	XP_011082935.1 trifunctional UDP-glucose 4,6-dehydratase/UDP-4-keto-6-deoxy-D-glucose 3,5-epimerase/UDP-4-keto-L-rhamnose-reductase RHM2-like [Sesamum indicum]
Unigene0013252	0.6	0.34	0.8	12.66	12.97	13.42	-4.48816	5.61702e-44	YAB2	XP_011088989.1 putative axial regulator YABBY 2 isoform X1 [Sesamum indicum]
Unigene0018542	1.08	0.87	1.28	18.14	16.78	13.19	-3.89673	5.95991e-44	AO1	XP_011091042.2 primary amine oxidase [Sesamum indicum]
Unigene0026504	19.06	15.22	14.57	2.71	2.88	2.31	2.62843	8.42793e-44	PAH1	PIN03878.1 Protein involved in plasmid maintenance/nuclear protein involved in lipid metabolism [Handroanthus impetiginosus]
Unigene0016246	0.24	0.36	0.36	8.39	7.35	8.93	-4.68358	9.23397e-44	COL5	PIN20509.1 hypothetical protein CDL12_06795 [Handroanthus impetiginosus]
Unigene0031448	7.35	6.19	6.97	0.26	0.52	0.56	3.93602	9.63864e-44	PIP5K4	PIN01142.1 Phosphatidylinositol-4-phosphate 5-kinase [Handroanthus impetiginosus]
Unigene0023830	84.5	98.42	110.84	26.83	28.44	27.16	1.8334	9.98076e-44	--	XP_012852645.1 PREDICTED: translocon-associated protein subunit beta-like [Erythranthe guttata]
Unigene0000627	6.06	8.71	6.86	41.73	36.95	37.68	-2.42749	1.07594e-43	SAC51	XP_020552776.1 transcription factor bHLH143 isoform X1 [Sesamum indicum]
Unigene0010081	0.87	0.67	0.77	16.6	11.55	11.76	-4.11079	1.32143e-43	At4g37250	XP_011097240.1 probable LRR receptor-like serine/threonine-protein kinase At4g37250 [Sesamum indicum]
Unigene0004932	0.67	0.61	1.24	18.24	20.54	13.54	-4.37587	1.50958e-43	MET1B	XP_011092241.1 DNA (cytosine-5)-methyltransferase 1B [Sesamum indicum]
Unigene0026931	0.46	0.88	1.6	26.18	30.46	27.86	-4.84506	2.19441e-43	ATHB-6	TKY47679.1 Homeobox-leucine zipper protein ATHB-6 [Spatholobus suberectus]
Unigene0004401	13.75	19.32	18.92	88.6	97.88	94.64	-2.43488	2.49606e-43	RPL15	PIN09319.1 60s ribosomal protein L15 [Handroanthus impetiginosus]
Unigene0032561	23.73	21.56	36.27	2.88	2.25	2.92	3.3408	3.55141e-43	NRT2.5	PIN14912.1 Permease of the major facilitator superfamily [Handroanthus impetiginosus]
Unigene0002278	9.85	8.69	8.39	40.71	42.02	40.91	-2.19886	3.86338e-43	RABA5A	PIN01160.1 GTPase Rab11/YPT3, small G protein superfamily [Handroanthus impetiginosus]
Unigene0034245	22.52	24.36	37.24	3.17	2.82	2.24	3.35348	4.03216e-43	NFD4	XP_011092895.1 protein NUCLEAR FUSION DEFECTIVE 4-like [Sesamum indicum]
Unigene0025477	29.66	33.12	43.24	6.86	7.65	7.77	2.25052	4.06336e-43	PBL3	XP_027097311.1 probable serine/threonine-protein kinase PBL3 [Coffea arabica]
Unigene0017374	126.61	114.23	100.5	28.1	32.21	25.66	1.9893	4.47577e-43	PP2C53	XP_011078036.1 probable protein phosphatase 2C 50 [Sesamum indicum]
Unigene0012913	2.29	3.76	4.29	42.4	44.55	60.44	-3.83333	5.47601e-43	--	XP_011082910.1 uncharacterized protein LOC105165554 [Sesamum indicum]
Unigene0027329	0.89	1.19	1.83	22.39	20.54	27.38	-4.16849	5.80139e-43	IQD1	XP_011096411.1 protein IQ-DOMAIN 1 isoform X1 [Sesamum indicum]
Unigene0026039	355.54	168.9	366.69	15.26	15.03	7.98	4.54135	6.45869e-43	SSL2	XP_011075619.1 protein STRICTOSIDINE SYNTHASE-LIKE 2 [Sesamum indicum]
Unigene0036260	8.18	6.59	13.96	155.98	130.93	153.56	-3.93841	7.19369e-43	sbt3	KZV41637.1 subtilisin-like protease [Dorcoceras hygrometricum]
Unigene0002281	22.33	33.15	26.78	3.08	3.04	4.2	2.99475	8.07131e-43	NUDT25	PSR90969.1 Nudix hydrolase [Actinidia chinensis var. chinensis] [Actinidia chinensis]
Unigene0029113	8.63	9.8	10.43	42.48	53.26	57.19	-2.40573	8.59743e-43	ABCB15	PIN03048.1 Multidrug/pheromone exporter, ABC superfamily [Handroanthus impetiginosus]
Unigene0028337	4.12	1.69	3.25	77.84	67.95	57.19	-4.48568	9.10407e-43	PSBO	XP_011099253.1 pentatricopeptide repeat-containing protein At1g20230 [Sesamum indicum]
Unigene0025334	456.38	300.11	464.07	59.35	44.49	62.83	2.87248	1.05634e-42	At1g64390	XP_011101037.1 endoglucanase 6 [Sesamum indicum]
Unigene0025643	120.83	80	100.54	17.76	18.3	15.48	2.54777	1.33852e-42	ALDH2C4	PIN25956.1 Aldehyde dehydrogenase [Handroanthus impetiginosus]
Unigene0004312	18.01	16.45	12.93	0.78	1.39	1.4	3.73059	1.47177e-42	AOS3	XP_011088323.1 allene oxide synthase 3-like [Sesamum indicum]
Unigene0032617	0.82	0.27	0.37	38.82	25.94	42.81	-6.20316	1.96641e-42	PSAN	XP_027330736.1 photosystem I reaction center subunit N, chloroplastic isoform X1 [Abrus precatorius]
Unigene0005485	49.25	37.04	20.36	704.36	645.64	735.04	-4.28912	2.96779e-42	PECS-1.1	XP_011078159.1 pectinesterase-like [Sesamum indicum]
Unigene0032671	1.08	0.82	0.45	38.53	26.23	26.48	-5.27893	3.22158e-42	EXLA1	PIN25731.1 hypothetical protein CDL12_01525 [Handroanthus impetiginosus]
Unigene0030233	211.24	190.19	194.63	38.5	41.79	26.18	2.48501	3.41568e-42	--	PIN24452.1 hypothetical protein CDL12_02803 [Handroanthus impetiginosus]
Unigene0027552	0.09	0.03	0.1	15.1	21.44	22.14	-8.05922	3.69751e-42	At5g47800	XP_011086288.1 BTB/POZ domain-containing protein At5g47800 isoform X2 [Sesamum indicum]
Unigene0032905	37.34	47.69	31.73	6.44	7.81	7.4	2.43111	3.76075e-42	HIPP06	XP_022889286.1 heavy metal-associated isoprenylated plant protein 3-like, partial [Olea europaea var. sylvestris] [Olea europaea]
Unigene0014089	0.18	0.33	0.04	28.22	25.4	18.91	-7.043	4.33098e-42	UGT29	XP_011090910.1 beta-D-glucosyl crocetin beta-1,6-glucosyltransferase-like [Sesamum indicum]
Unigene0035829	146.26	77.67	117.53	1.4	3.8	0.84	5.82102	4.43898e-42	CPC	XP_023739678.1 transcription factor CPC-like [Lactuca sativa]
Unigene0004515	20.25	20.02	18.48	117.77	112.45	88.04	-2.43755	4.64446e-42	JAC1	XP_011083721.1 J domain-containing protein required for chloroplast accumulation response 1 [Sesamum indicum]
Unigene0035436	5.57	4.77	3.28	101.87	85.63	64.5	-4.20963	6.06309e-42	PSAH	GER48344.1 photosystem I reaction center subunit VI [Striga asiatica]
Unigene0009773	11.23	10.8	13.56	60.16	58.14	67.17	-2.38164	6.07443e-42	CATHB2	XP_012835019.1 PREDICTED: cathepsin B-like [Erythranthe guttata]
Unigene0028532	32.4	27.68	49.1	0.51	1.24	0.33	5.71398	7.01744e-42	--	GER46892.1 hypothetical protein STAS_23952 [Striga asiatica]
Unigene0001644	0.07	0.44	0.36	88.62	56.68	37.86	-7.71787	7.11658e-42	PSBQ2	PIN14260.1 hypothetical protein CDL12_13119 [Handroanthus impetiginosus]
Unigene0032446	66.44	62.99	51.62	9.68	13.21	9.09	2.50115	7.14217e-42	GAT1_2.1	PIN01875.1 Gamma-glutamyl-gamma-aminobutyrate hydrolase [Handroanthus impetiginosus]
Unigene0033505	152.74	157.81	158.79	58.36	63.64	71.92	1.27517	8.60955e-42	ADH1	PIN14138.1 Alcohol dehydrogenase, class III [Handroanthus impetiginosus]
Unigene0011117	37.53	24.39	19.74	1.97	1.86	1.91	3.83051	9.15414e-42	CKX3	BAM74651.1 cytokinin oxidase/dehydrogenase [Torenia fournieri]
Unigene0025481	0.84	0.32	0.35	13.51	15.49	16	-4.8973	9.86557e-42	CTPA3	XP_011075200.1 carboxyl-terminal-processing peptidase 3, chloroplastic [Sesamum indicum]
Unigene0034521	6.08	6.78	15.39	335.21	348.14	214.31	-4.98985	1.36854e-41	PCS1	XP_011099902.1 aspartic proteinase PCS1 [Sesamum indicum]
Unigene0031726	5.08	5.28	2.96	61.48	71.98	47.89	-3.76711	1.371e-41	CYP81D1	XP_012831740.1 PREDICTED: cytochrome P450 81E8-like [Erythranthe guttata]
Unigene0005802	0.61	0.25	0.28	26.08	21.27	22.63	-5.93984	1.38657e-41	ANN4	PIN09390.1 Annexin [Handroanthus impetiginosus]
Unigene0033118	0.59	0.52	1.29	17.68	16.56	17.82	-4.43907	1.46313e-41	IQD31	XP_011098588.1 protein IQ-DOMAIN 31-like [Sesamum indicum]
Unigene0010962	86.27	57.01	116.64	2.18	5.38	3.8	4.51603	1.47311e-41	PLP3	XP_011099197.1 patatin-like protein 2 [Sesamum indicum]
Unigene0032924	315.87	348.6	322.57	106.13	99.56	77.37	1.802	1.57656e-41	BOR1	XP_022845088.1 boron transporter 1-like [Olea europaea var. sylvestris] [Olea europaea]
Unigene0007007	60.24	36.22	82.78	4.4	2.88	3.77	4.01977	1.72167e-41	WSD1	XP_011075993.1 O-acyltransferase WSD1 [Sesamum indicum]
Unigene0024303	48.06	61.29	27.34	1.8	2.43	3.14	4.2131	2.51391e-41	PPCK2	TEY91809.1 c-Jun N-terminal kinase [Salvia splendens]
Unigene0001134	42.99	49.35	62.4	322.96	280.53	308.19	-2.55868	2.75503e-41	GRP-2	XP_012837166.1 PREDICTED: glycine-rich protein 2 [Erythranthe guttata]
Unigene0027322	33.9	36.78	38.9	4.09	3.97	6.79	2.88345	3.23789e-41	LOGL6	XP_011074666.1 cytokinin riboside 5'-monophosphate phosphoribohydrolase LOG1-like [Sesamum indicum]
Unigene0023314	171.27	251.39	228.36	56.66	57.52	62.94	1.87797	3.26843e-41	UBC10	TYH98712.1 hypothetical protein ES332_A11G016500v1, partial [Gossypium tomentosum]
Unigene0024446	19.86	20.98	24.84	131.62	102.53	109.53	-2.38754	3.59188e-41	ACT11	THG00073.1 hypothetical protein TEA_006755 [Camellia sinensis var. sinensis] [Camellia sinensis]
Unigene0030351	1314.54	1000.41	1283.38	334.95	309.44	294.35	1.93853	3.72258e-41	CER1	XP_011085147.1 protein ECERIFERUM 1-like [Sesamum indicum]
Unigene0026653	1.64	2.1	1.47	14.33	12.53	12.38	-2.91297	4.11702e-41	Gba2	XP_011087641.1 non-lysosomal glucosylceramidase isoform X1 [Sesamum indicum]
Unigene0001776	3.52	1.55	6.07	183.46	169.95	121.56	-5.41402	4.34794e-41	PLAT1	XP_011090524.1 PLAT domain-containing protein 3-like [Sesamum indicum]
Unigene0019300	44.41	58.29	37.47	6.05	4.65	6.58	3.02	4.83873e-41	--	XP_011074521.1 uncharacterized protein LOC105159227 [Sesamum indicum]
Unigene0017337	375.83	579.17	503.41	119.19	120.2	137.62	1.95172	5.17341e-41	RBP47	XP_011092727.1 polyadenylate-binding protein RBP47-like isoform X2 [Sesamum indicum]
Unigene0007051	0.68	0.31	0.83	11.63	12.09	11.47	-4.27316	5.70937e-41	TCP7	KZV34788.1 hypothetical protein F511_00690 [Dorcoceras hygrometricum]
Unigene0029721	32.43	42.92	34.88	12.25	12.04	12.91	1.56714	6.72703e-41	At2g27500	XP_011090341.1 glucan endo-1,3-beta-glucosidase 14 [Sesamum indicum]
Unigene0024096	205.11	221.25	186.73	90.27	88.65	84.88	1.21665	8.3968e-41	HAB1	XP_022853205.1 protein phosphatase 2C 7-like [Olea europaea var. sylvestris] [Olea europaea]
Unigene0019557	17	17.72	18.98	4.55	5.3	5.71	1.78708	9.22308e-41	At4g12130	XP_011081120.1 putative transferase At4g12130, mitochondrial [Sesamum indicum]
Unigene0032298	20.28	19.44	19.47	3.01	4.15	3.15	2.52131	9.85296e-41	--	XP_012848558.1 PREDICTED: uncharacterized protein LOC105968470 isoform X1 [Erythranthe guttata]
Unigene0017700	4.24	7.56	5.09	49.23	49.38	61.03	-3.24058	1.05268e-40	--	KAE9445567.1 hypothetical protein C3L33_22534, partial [Rhododendron williamsianum]
Unigene0006803	12.15	10.49	11.88	2.07	1.9	1.72	2.60093	1.09875e-40	PLP6	PIN11102.1 Ca2+-independent phospholipase A2 [Handroanthus impetiginosus]
Unigene0004001	20.12	18.75	12.7	0.54	0.41	0.15	5.55096	1.61052e-40	--	-
Unigene0029874	25	40.16	21.75	268.64	292.78	367.07	-3.41729	1.64135e-40	SAPK1	XP_011100039.1 serine/threonine-protein kinase SAPK2 [Sesamum indicum]
Unigene0032978	0.35	0.13	0.39	15.88	13.09	10.78	-5.5138	1.73806e-40	At2g45590	PIN06540.1 MEKK [Handroanthus impetiginosus]
Unigene0034933	0.29	0.14	0.05	33.9	27.85	33.34	-7.63012	1.79556e-40	BKI1	XP_011074445.1 BRI1 kinase inhibitor 1 [Sesamum indicum]
Unigene0029054	3.09	3.8	6.71	65.81	61.92	62.06	-3.80273	1.98098e-40	COB	PIN06356.1 hypothetical protein CDL12_21078 [Handroanthus impetiginosus]
Unigene0029318	5.92	5.37	1.92	138.84	120.25	160.25	-4.98842	2.03892e-40	--	XP_009609063.1 PREDICTED: serine/threonine-protein kinase STY8-like [Nicotiana tomentosiformis]
Unigene0000763	1.61	2.81	2.3	19.33	17.12	22.22	-3.12609	2.04941e-40	PMI15	PIM99912.1 hypothetical protein CDL12_27582 [Handroanthus impetiginosus]
Unigene0026617	1.38	2.42	2.69	28.08	29.04	34.69	-3.82236	2.13786e-40	--	PIN15042.1 hypothetical protein CDL12_12305 [Handroanthus impetiginosus]
Unigene0032688	78.35	82.27	80.91	31.48	34.61	37.64	1.21937	2.32392e-40	CATHB3	XP_012835019.1 PREDICTED: cathepsin B-like [Erythranthe guttata]
Unigene0025530	0.74	0.73	0.66	7.09	6.91	9.47	-3.46189	2.45031e-40	CCAMK	XP_011091886.1 calcium and calcium/calmodulin-dependent serine/threonine-protein kinase [Sesamum indicum]
Unigene0009090	0.23	0.05	0.13	18.64	17.63	14.09	-6.94051	2.50747e-40	MIPS	PIN26746.1 Myo-inositol-1-phosphate synthase [Handroanthus impetiginosus]
Unigene0000625	44.79	51.8	53.39	153.72	164.88	152.54	-1.65139	2.64001e-40	ZDS	PIN23414.1 Amine oxidase [Handroanthus impetiginosus]
Unigene0013044	11.12	9.31	12.54	1.02	0.87	0.75	3.64254	2.64001e-40	At3g26430	XP_012855315.1 PREDICTED: GDSL esterase/lipase At3g26430 isoform X2 [Erythranthe guttata]
Unigene0019041	4.31	4.88	5.52	0.13	0.09	0.1	5.52258	2.86022e-40	FPP7	XP_011083567.1 filament-like plant protein 7 isoform X2 [Sesamum indicum]
Unigene0028247	20.01	22.22	21.92	7.47	6.88	7.63	1.54526	3.34463e-40	--	XP_020551743.1 uncharacterized protein LOC105169152 isoform X2 [Sesamum indicum]
Unigene0034099	36.77	37.91	23.64	2.82	3.77	4.09	3.20257	3.65052e-40	MTP10	XP_011095744.1 metal tolerance protein 9-like [Sesamum indicum]
Unigene0036648	7.54	6.42	10.82	81.79	69.17	68.97	-3.1498	4.05772e-40	GLA	XP_011086670.1 uncharacterized protein LOC105168326 isoform X2 [Sesamum indicum]
Unigene0005561	7.33	9.97	9.38	49.96	42.67	43.95	-2.35592	6.03615e-40	CIPK6	PIN20576.1 Serine/threonine protein kinase [Handroanthus impetiginosus]
Unigene0018070	94.07	90.1	89.15	30.81	22.4	25.58	1.79451	6.69333e-40	LNG1	XP_011099024.1 protein LONGIFOLIA 2 [Sesamum indicum]
Unigene0035508	1.19	1.63	2.64	24.04	23.15	26.52	-3.75489	6.93705e-40	R1A-10	XP_012855653.1 PREDICTED: putative late blight resistance protein homolog R1A-10 [Erythranthe guttata]
Unigene0029332	1.96	1.14	1.81	38.28	28.68	23.15	-4.19789	9.65197e-40	PORC	XP_011069382.1 protochlorophyllide reductase-like [Sesamum indicum]
Unigene0024594	211.21	152.4	285.62	2487.25	2355.02	2024.66	-3.40286	1.1579e-39	CXE8	XP_011091180.1 probable carboxylesterase 8 [Sesamum indicum]
Unigene0023801	1.03	1.04	0.84	10.67	8.64	9.13	-3.28883	1.25494e-39	MEE23	XP_011085179.1 berberine bridge enzyme-like 13 [Sesamum indicum]
Unigene0032472	5.56	5.8	7.12	0.72	0.58	0.88	3.08356	1.38453e-39	HDG11	XP_011086973.1 homeobox-leucine zipper protein HDG11 [Sesamum indicum]
Unigene0025189	6.48	5.33	6.18	0.37	0.61	0.6	3.5092	1.38911e-39	RLP47	XP_012844644.1 PREDICTED: LRR receptor-like serine/threonine-protein kinase FLS2 [Erythranthe guttata]
Unigene0026287	42.89	44.6	43.81	19.47	19.21	20.52	1.1492	1.41883e-39	At2g32040	XP_011090705.1 folate-biopterin transporter 1, chloroplastic [Sesamum indicum]
Unigene0017605	5.9	6.47	4.81	36.34	43.2	39.46	-2.79216	1.45118e-39	BRH1	XP_011070406.1 RING-H2 finger protein ATL16 [Sesamum indicum]
Unigene0030095	1891.03	1524.85	1742.06	592.81	568.1	590.5	1.55828	1.65183e-39	APG	PIN17096.1 Triacylglycerol lipase [Handroanthus impetiginosus]
Unigene0025712	16.33	15.39	6.14	277.15	285.81	359.25	-4.60635	1.6998e-39	ATHB-20	PIM98915.1 hypothetical protein CDL12_28598 [Handroanthus impetiginosus]
Unigene0005979	1.09	2.05	1.23	34.62	25.12	47.97	-4.62338	1.96231e-39	GLO2	XP_012836481.1 PREDICTED: peroxisomal (S)-2-hydroxy-acid oxidase GLO1-like [Erythranthe guttata]
Unigene0029832	0.03	0	0.13	21.52	21.22	23.23	-8.68759	2.01923e-39	AAP7	XP_011097705.1 probable amino acid permease 7 [Sesamum indicum]
Unigene0010257	7.17	6.57	10.03	57.14	52.95	64.43	-2.87618	2.06018e-39	--	XP_011076213.1 protein IQ-DOMAIN 31 [Sesamum indicum]
Unigene0029991	0.71	0.54	0.39	9.47	7.96	8.97	-4.00877	2.15661e-39	R1B-16	XP_011071935.1 putative late blight resistance protein homolog R1A-3 [Sesamum indicum]
Unigene0008045	37	36.17	35.67	112.41	107.78	106.85	-1.58726	2.31198e-39	DGD1	XP_011094235.1 digalactosyldiacylglycerol synthase 1, chloroplastic [Sesamum indicum]
Unigene0025401	0.15	0.18	0.12	56.07	53.16	23.39	-8.20316	2.56397e-39	--	PIN04759.1 Haloacid dehalogenase-like hydrolase [Handroanthus impetiginosus]
Unigene0010804	0.28	0.34	0.47	35.92	47.42	32.51	-6.73179	3.654e-39	--	GER28854.1 polyketide cyclase/dehydrase and lipid transportsuperfamily protein [Striga asiatica]
Unigene0016404	300.29	292.68	223.16	79.44	77.28	73.63	1.82497	3.66243e-39	XYLA	XP_022842364.1 xylose isomerase [Olea europaea var. sylvestris] [Olea europaea]
Unigene0032564	154.69	148.4	85.18	17.79	17.62	16.19	2.91162	4.18882e-39	PMI2	XP_012840994.1 PREDICTED: mannose-6-phosphate isomerase 1-like [Erythranthe guttata]
Unigene0032097	5.21	4.51	7.05	0.06	0.02	0.04	7.1267	5.25189e-39	PDR1	XP_020547917.1 LOW QUALITY PROTEIN: pleiotropic drug resistance protein 1 [Sesamum indicum]
Unigene0030232	1.51	1.87	2.75	19.13	21.31	22.93	-3.36984	5.41739e-39	ALMT4	PIN03455.1 putative membrane protein [Handroanthus impetiginosus]
Unigene0024840	10.69	12.33	6.24	115.01	96.68	117.2	-3.4906	6.60698e-39	--	PIN11392.1 Junctional membrane complex protein Junctophilin [Handroanthus impetiginosus]
Unigene0013583	40.59	42.5	42.73	161.3	132.01	151.81	-1.82283	7.4344e-39	RFS6	XP_011078382.1 probable galactinol--sucrose galactosyltransferase 6 [Sesamum indicum]
Unigene0034405	1.42	1.23	1.65	13.11	13.31	13.4	-3.21108	8.37356e-39	--	PIN17495.1 Protein involved in mRNA turnover and stability [Handroanthus impetiginosus]
Unigene0035538	2.49	2.47	3.84	23.78	20.84	25.39	-2.99199	8.47551e-39	ABCC10	PIN19056.1 Multidrug resistance-associated protein/mitoxantrone resistance protein, ABC superfamily [Handroanthus impetiginosus]
Unigene0017527	0.75	0.7	0.85	12.95	12.43	8.21	-3.86833	9.47846e-39	GA2OX1	BAJ65444.1 gibberellin 2-oxidase [Torenia fournieri]
Unigene0031559	16.21	16.25	22.61	2.22	2.15	1.79	3.16026	9.48269e-39	ERF2	XP_012858578.1 PREDICTED: ethylene-responsive transcription factor 2-like [Erythranthe guttata]
Unigene0017812	167.51	171.02	135.8	26.19	36.07	38.55	2.23425	9.61123e-39	--	-
Unigene0011521	1.81	2.5	1.98	13.48	13.23	15.55	-2.74816	1.26422e-38	At5g55860	PIM97658.1 hypothetical protein CDL12_29870 [Handroanthus impetiginosus]
Unigene0000849	0.05	0.06	0.1	11.2	10.49	5.87	-7.03604	1.47258e-38	ABCB4	XP_011079478.1 ABC transporter B family member 4 [Sesamum indicum]
Unigene0033328	3.65	4.43	3.23	26.48	24.42	25.17	-2.74973	1.48442e-38	--	-
Unigene0030024	0.75	0.26	0.94	23.31	21.45	16.98	-4.98466	1.57846e-38	At1g12500	PIN18288.1 Glucose-6-phosphate/phosphate and phosphoenolpyruvate/phosphate antiporter [Handroanthus impetiginosus]
Unigene0031047	24.87	49.28	57.17	3.97	3.53	4.26	3.48113	1.65457e-38	TPR4	XP_031105090.1 topless-related protein 1-like isoform X2 [Ipomoea triloba]
Unigene0025101	0.38	1.46	1	57.31	40.71	29.17	-5.48495	2.1763e-38	PATL3	KZV50911.1 patellin-2-like [Dorcoceras hygrometricum]
Unigene0024292	0.65	0.87	1.26	12.62	13.46	16.46	-3.93566	2.60694e-38	BHLH110	XP_011083625.1 transcription factor bHLH110 isoform X1 [Sesamum indicum]
Unigene0008619	43.52	47.33	46.92	137.36	126.1	130.45	-1.5156	2.70241e-38	ATHB-13	XP_011087214.1 homeobox-leucine zipper protein HAT5 [Sesamum indicum]
Unigene0012327	83.48	83.92	84.88	39.33	41.91	37.07	1.09245	2.94625e-38	STY46	PIN16258.1 Tyrosine kinase [Handroanthus impetiginosus]
Unigene0032923	3.05	3.57	8.48	126.22	117.57	145.2	-4.68711	3.06095e-38	BOR1	XP_012080056.1 probable boron transporter 2 [Jatropha curcas]
Unigene0008520	0.22	0.36	0.56	22.26	20.22	20.8	-5.79464	3.25065e-38	PSAF	GER40981.1 photosystem I reaction center subunit III [Striga asiatica]
Unigene0024091	0.17	0.04	0.19	16.79	16.37	9.44	-6.73471	3.72168e-38	At1g67900	XP_011086649.1 BTB/POZ domain-containing protein At1g67900 [Sesamum indicum]
Unigene0001697	75.17	73.87	84.67	33	30.84	29.64	1.32199	3.72168e-38	DTX24	PIN05103.1 putative membrane protein, predicted efflux pump [Handroanthus impetiginosus]
Unigene0036509	8.9	9.43	7.01	47.55	41.25	42.55	-2.37393	3.95805e-38	TKT2	XP_011090872.1 probable 1-deoxy-D-xylulose-5-phosphate synthase, chloroplastic [Sesamum indicum]
Unigene0036166	64.05	69.88	78.6	23.11	20.32	23.43	1.66845	5.14362e-38	PP16-2	XP_011093160.1 elicitor-responsive protein 3 [Sesamum indicum]
Unigene0008747	3.58	1.74	4.15	68.75	62.27	48	-4.24061	5.85869e-38	3MAT	XP_011076802.1 anthocyanidin 3-O-glucoside 6''-O-acyltransferase [Sesamum indicum]
Unigene0001924	3.99	4.84	2.99	76.16	65.48	140.89	-4.5791	6.21169e-38	PMEI7	PIN21743.1 Pectinesterase [Handroanthus impetiginosus]
Unigene0030716	115.71	57.05	65.06	0.4	0.39	0	8.2338	7.79215e-38	--	-
Unigene0010646	3.01	1.72	4.04	56.37	42.24	45.69	-4.04035	8.34067e-38	PER12	XP_011101199.1 peroxidase 12 [Sesamum indicum]
Unigene0021506	11.74	15.54	14.29	3.2	3.36	3.07	2.10994	8.84336e-38	--	XP_011086622.1 uncharacterized protein LOC105168293 [Sesamum indicum]
Unigene0023976	3.94	3.98	4.2	19.63	17.42	20.49	-2.24718	1.00063e-37	--	PIM98129.1 hypothetical protein CDL12_29395 [Handroanthus impetiginosus]
Unigene0028954	14.58	16.45	10.83	0.3	0.39	0.6	5.02013	1.11325e-37	ZPR4	XP_012839681.1 PREDICTED: uncharacterized protein LOC105960057 [Erythranthe guttata]
Unigene0029546	17.22	13.37	10.44	0.92	0.96	0.91	3.87834	1.21107e-37	--	TEY21878.1 hypothetical protein Saspl_044686 [Salvia splendens]
Unigene0000644	9.37	11.89	10.52	0.36	0.94	0.76	3.9474	1.3388e-37	CER2	XP_011091952.1 protein ECERIFERUM 2-like [Sesamum indicum]
Unigene0014409	0.55	0.67	0.31	13.55	10.26	15.26	-4.67446	1.35892e-37	RCS3	EPS66048.1 cysteine synthase [Genlisea aurea]
Unigene0023140	0.23	0.33	0.31	15.87	15.09	11.31	-5.60247	1.40184e-37	SHT	XP_011083883.1 spermidine hydroxycinnamoyl transferase [Sesamum indicum]
Unigene0025065	12.17	14.69	10.57	0.03	0.14	0.06	7.34642	1.55991e-37	MYB124	XP_011071018.1 transcription factor MYB124-like isoform X1 [Sesamum indicum]
Unigene0001748	65.46	73.46	76.87	32.47	28.05	31.45	1.23039	1.65743e-37	BIM1	TEY84374.1 hypothetical protein Saspl_006032 [Salvia splendens]
Unigene0032395	1.12	1.68	1.19	16.96	12.59	16.45	-3.52717	1.7028e-37	GSVIVT00026920001	XP_011101030.1 probable polygalacturonase [Sesamum indicum]
Unigene0007939	70.59	62.76	71.17	22.98	19.31	17.65	1.77065	1.71129e-37	PAO2	XP_027064374.1 polyamine oxidase 2-like isoform X1 [Coffea arabica]
Unigene0018932	30.43	32.8	22.25	5.68	5.09	4.67	2.46891	2.41086e-37	GPAT8	XP_011092551.1 glycerol-3-phosphate 2-O-acyltransferase 4 [Sesamum indicum]
Unigene0024781	1.18	0.71	0.22	36.47	27.01	28.88	-5.45195	2.41086e-37	MENG	XP_011086605.1 2-phytyl-1,4-beta-naphthoquinone methyltransferase, chloroplastic [Sesamum indicum]
Unigene0026474	24.52	27.2	26.36	8.04	7.05	8.63	1.71885	2.43963e-37	ERF008	XP_022844732.1 ethylene-responsive transcription factor ERF011-like [Olea europaea var. sylvestris] [Olea europaea]
Unigene0033722	14.36	16.44	16.45	48.57	46.5	51.57	-1.63389	2.4471e-37	KIPK1	XP_011077889.1 serine/threonine-protein kinase D6PKL1 [Sesamum indicum]
Unigene0031680	0	0.73	0.25	46.17	36.65	45.32	-7.03072	2.69735e-37	--	XP_020553577.1 uncharacterized protein LOC110012835 [Sesamum indicum]
Unigene0030402	22.12	26.9	41.38	2.69	2.96	3.8	3.25794	2.88639e-37	A6	XP_011089044.1 probable glucan endo-1,3-beta-glucosidase A6 [Sesamum indicum]
Unigene0032225	5.21	4.92	4.06	0.26	0.24	0.25	4.24184	2.89988e-37	RHD3	XP_011072514.1 protein ROOT HAIR DEFECTIVE 3 homolog 1 [Sesamum indicum]
Unigene0004057	0.6	0.55	0.38	14.16	12.61	18.1	-4.87415	3.25119e-37	HAT4	XP_011089804.1 homeobox-leucine zipper protein HAT4 [Sesamum indicum]
Unigene0028066	17.74	21.23	22.17	6.88	5.81	7.14	1.62443	3.67958e-37	ACA8	XP_011094124.1 calcium-transporting ATPase 10, plasma membrane-type isoform X1 [Sesamum indicum]
Unigene0025172	70.92	78.8	77.59	19.22	26.69	24.74	1.6859	3.78655e-37	At5g01750	XP_022874121.1 protein LURP-one-related 10-like [Olea europaea var. sylvestris] [Olea europaea]
Unigene0012558	5.71	7.1	5.85	40.05	40.86	54.1	-2.85505	4.22403e-37	APS1	PIN18726.1 Acid phosphatase [Handroanthus impetiginosus]
Unigene0005397	4.82	8.06	6.67	0.21	0.15	0.42	4.64755	4.57659e-37	At4g27290	XP_012827565.1 PREDICTED: G-type lectin S-receptor-like serine/threonine-protein kinase At4g27290 [Erythranthe guttata]
Unigene0035394	1.79	2.08	1.18	22.3	20.82	23.18	-3.71465	6.05541e-37	--	XP_011086042.1 LOW QUALITY PROTEIN: protein E6-like [Sesamum indicum]
Unigene0029155	0.2	0.87	0.51	42.14	30.94	30.66	-6.0369	6.10889e-37	--	TEY29653.1 hypothetical protein Saspl_036242 [Salvia splendens]
Unigene0017377	19.86	30.79	21.76	3.9	4.97	4.17	2.47325	6.30887e-37	At1g30090	GER40846.1 SKP1-like protein [Striga asiatica]
Unigene0020754	0.08	0.08	0.15	9.01	4.36	6	-5.96541	6.56748e-37	NRPB1	XP_011099129.1 DNA-directed RNA polymerase II subunit 1 [Sesamum indicum]
Unigene0032380	115.29	145.05	141.8	45.22	47.26	55.05	1.44669	6.71812e-37	--	RVX04110.1 B2 protein [Vitis vinifera]
Unigene0035798	7.02	5.99	6.93	31.38	36.21	32.08	-2.32149	7.15105e-37	AHL5	XP_020550658.1 AT-hook motif nuclear-localized protein 9 [Sesamum indicum]
Unigene0001017	31.89	40.3	29.15	5	4.96	7.52	2.53543	7.22158e-37	WOX1	QFQ60703.1 WUSCHEL-related homeobox transcription factor 1 [Jasminum sambac]
Unigene0036099	64.46	72.02	62.94	24.93	26.65	29.5	1.29839	7.25696e-37	UGT89B2	XP_011084011.1 LOW QUALITY PROTEIN: UDP-glycosyltransferase 89B2-like [Sesamum indicum]
Unigene0018302	10.1	10.99	9.95	0.94	0.99	1.2	3.30989	8.05171e-37	--	-
Unigene0034535	38.98	35.91	41.22	13.55	12.14	12.19	1.61598	8.08264e-37	SDR1	XP_020550645.1 uncharacterized protein LOC105174340 [Sesamum indicum]
Unigene0034426	51.97	36.74	49.61	682.15	612.84	376.38	-3.59495	9.11909e-37	CP12-2	XP_011079555.1 calvin cycle protein CP12-1, chloroplastic-like [Sesamum indicum]
Unigene0013385	34.77	36.77	30.26	133.57	127.51	116.52	-1.89112	9.51028e-37	CLASP	XP_011083102.1 CLIP-associated protein isoform X2 [Sesamum indicum]
Unigene0026667	8.37	7.59	9.1	0.25	0.18	0.2	5.31389	1.0918e-36	UGT85A24	AYC63483.1 UDP-glycosyltransferase [Scoparia dulcis]
Unigene0031149	3.32	3.59	4.88	25.71	24.44	23.67	-2.64645	1.13318e-36	NPY2	PIN12545.1 hypothetical protein CDL12_14843 [Handroanthus impetiginosus]
Unigene0001046	0	0.08	0.15	19.66	19.89	15.41	-7.9006	1.62833e-36	TBL38	TEY69919.1 hypothetical protein Saspl_017324 [Salvia splendens]
Unigene0017943	32.06	33.53	28.85	155.3	145.02	194.52	-2.38949	1.69761e-36	Cenpv	XP_011099939.1 centromere protein V [Sesamum indicum]
Unigene0021009	19.82	10.43	14.87	0.4	0.72	0.65	4.67195	1.74818e-36	--	-
Unigene0006634	9.2	6.52	12.17	91.88	79.33	101.01	-3.28695	2.204e-36	At4g20820	XP_012827408.1 PREDICTED: cannabidiolic acid synthase-like [Erythranthe guttata]
Unigene0032041	88.25	94.54	75.19	324.79	299.48	316.08	-1.86594	2.39042e-36	CGS1	EYU44131.1 hypothetical protein MIMGU_mgv1a002982mg [Erythranthe guttata]
Unigene0002302	580.21	534.22	422.79	137.83	147.8	157.49	1.79455	2.80588e-36	HPD	XP_011100558.1 4-hydroxyphenylpyruvate dioxygenase [Sesamum indicum]
Unigene0034321	4.59	8.28	3.93	69.69	57.91	71.03	-3.56355	3.12483e-36	FLZ8	PIN09011.1 hypothetical protein CDL12_18404 [Handroanthus impetiginosus]
Unigene0035135	24.42	25.13	23.43	8.83	9.37	8.98	1.42496	3.12483e-36	OXI1	XP_012835169.1 PREDICTED: serine/threonine-protein kinase OXI1-like [Erythranthe guttata]
Unigene0028560	29	22.51	33.95	2.41	3.8	3.81	3.09237	3.12483e-36	MYB15	XP_011091315.1 myb-related protein Myb4 [Sesamum indicum]
Unigene0026722	12.6	17.33	21.56	1.61	1.2	2.14	3.37879	3.96352e-36	PME51	XP_011097189.1 probable pectinesterase/pectinesterase inhibitor 51 [Sesamum indicum]
Unigene0020063	0.16	0.3	0.07	59.82	58.67	42.06	-8.24281	4.02728e-36	At2g38640	XP_011074224.1 protein LURP-one-related 8 [Sesamum indicum]
Unigene0001519	94.22	71.7	93.67	22.86	22.72	18.93	2.00864	4.90528e-36	--	PIN17154.1 hypothetical protein CDL12_10176 [Handroanthus impetiginosus]
Unigene0014281	0.36	0.59	0.1	16.89	18.12	15.97	-5.60147	7.65912e-36	WRKY65	PIN21433.1 hypothetical protein CDL12_05857 [Handroanthus impetiginosus]
Unigene0001082	6.78	6.73	11.24	78.25	64.99	82.39	-3.18846	8.35473e-36	AGAL1	TEY56692.1 hypothetical protein Saspl_022816 [Salvia splendens]
Unigene0019335	0.3	0.36	0.41	61.83	31.59	72.59	-7.27752	8.59952e-36	At3g24670	TEY17436.1 pectate lyase [Salvia splendens]
Unigene0018232	4.69	4.5	3.16	40.7	32.47	41.52	-3.21516	9.12679e-36	ATPD	XP_011074150.1 ATP synthase delta chain, chloroplastic-like [Sesamum indicum]
Unigene0021616	3.65	3.71	4.26	21.39	24.09	24.29	-2.586	1.285e-35	--	XP_022887392.1 uncharacterized protein At4g22758-like [Olea europaea var. sylvestris] [Olea europaea]
Unigene0032221	886.8	819.64	804.15	377.87	388.9	406.02	1.09808	1.67867e-35	BAM1	XP_011091372.1 beta-amylase 1, chloroplastic [Sesamum indicum]
Unigene0025653	1.01	0.41	0.63	14.05	10.68	12.38	-4.17811	1.8042e-35	ARF4	XP_011089883.1 auxin response factor 4 isoform X1 [Sesamum indicum]
Unigene0011110	146.21	162.8	115.61	38.77	44.79	43.58	1.73975	2.04527e-35	RPP1A	KZV29930.1 hypothetical protein F511_28441 [Dorcoceras hygrometricum]
Unigene0032799	1.63	1.43	1.89	17.65	18.77	14.32	-3.35762	2.46205e-35	HIPP37	GER24743.1 heavy metal transport/detoxification superfamily protein [Striga asiatica]
Unigene0016620	1.85	2.13	3.26	29.7	25.8	21.48	-3.41042	2.47785e-35	AHL2	XP_020553746.1 AT-hook motif nuclear-localized protein 7-like isoform X1 [Sesamum indicum]
Unigene0002303	48.12	50.7	57.65	0	0.47	0.1	8.10071	2.48637e-35	LTP-2	XP_011097163.1 non-specific lipid-transfer protein 2 [Sesamum indicum]
Unigene0006214	0.36	0.55	0.47	11.65	7.95	17.19	-4.73657	2.48637e-35	TMK1	KZV15917.1 hypothetical protein F511_29089 [Dorcoceras hygrometricum]
Unigene0033509	62.73	67.06	63.44	32.27	30.88	29.01	1.06811	3.32704e-35	HXK2	XP_011093636.1 hexokinase-1 [Sesamum indicum]
Unigene0027706	20.08	23.96	19.18	8.51	8.38	7.9	1.35062	3.39188e-35	At5g08430	XP_011087407.1 uncharacterized protein At5g08430 [Sesamum indicum]
Unigene0016692	0	0.48	0.2	53.61	36.45	33.38	-7.50406	4.34243e-35	psaD	XP_031272111.1 photosystem I reaction center subunit II, chloroplastic-like [Pistacia vera]
Unigene0033719	0.76	1.95	1.08	16.6	16.38	17.15	-3.7254	5.46374e-35	D6PKL1	KAB5519031.1 hypothetical protein DKX38_023350 [Salix brachista]
Unigene0006476	26.85	29.29	27.7	80.28	79.21	89.7	-1.57154	6.0594e-35	--	PIN16008.1 hypothetical protein CDL12_11338 [Handroanthus impetiginosus]
Unigene0004373	0.16	0	0.14	27.12	28.07	27.47	-8.10608	6.26725e-35	CCR1	ACD13265.1 cinnamoyl-CoA reductase [Paulownia sp. ZKC-2008]
Unigene0001406	3.83	4.06	4.03	16.59	15.76	16.2	-2.02609	6.49223e-35	WAV3	PIN08526.1 Anaphase-promoting complex (APC), subunit 11 [Handroanthus impetiginosus]
Unigene0004291	4.23	3.61	7.52	0.11	0.07	0.09	5.83007	6.7017e-35	RE2	RHN67289.1 putative RNA-directed DNA polymerase [Medicago truncatula]
Unigene0031819	34.03	28.37	36.19	137.81	129.3	136.7	-2.03416	6.76816e-35	FIM2	XP_011080537.1 fimbrin-2 [Sesamum indicum]
Unigene0003918	0.38	0.31	0.19	9.49	7.25	8.36	-4.83404	7.1881e-35	LECRKS7	XP_011075871.1 L-type lectin-domain containing receptor kinase VIII.2 [Sesamum indicum]
Unigene0024206	0.1	0.18	0.08	27.79	19.64	32.11	-7.78754	7.22281e-35	GAPA1	XP_011070460.1 glyceraldehyde-3-phosphate dehydrogenase A, chloroplastic [Sesamum indicum]
Unigene0032426	3.62	3.16	4.51	0.25	0.2	0.21	4.09644	7.25903e-35	At4g18820	XP_011085319.1 protein STICHEL-like 4 [Sesamum indicum]
Unigene0031661	443.46	421.18	271.32	64.35	73.02	78.45	2.39601	8.08377e-35	At1g54200	XP_022860858.1 protein BIG GRAIN 1-like B [Olea europaea var. sylvestris] [Olea europaea]
Unigene0027720	16.29	14.53	13.6	0.03	0.07	0.06	8.11699	9.14547e-35	--	PIN24152.1 Ubiquitinyl hydrolase 1 [Handroanthus impetiginosus]
Unigene0021849	2.86	3.9	5.42	41.08	42.69	32.76	-3.25812	9.36217e-35	PAD4	XP_011099680.1 lipase-like PAD4 [Sesamum indicum]
Unigene0000821	0.6	0.5	1.06	15.3	14.49	11.31	-4.25004	9.5136e-35	UGT79B6	XP_011082711.1 anthocyanidin 3-O-glucoside 2'''-O-xylosyltransferase-like isoform X1 [Sesamum indicum]
Unigene0026934	3.26	5.01	4.4	23.6	24.12	25.07	-2.52232	1.12912e-34	--	RVW44293.1 hypothetical protein CK203_071106 [Vitis vinifera]
Unigene0001477	27.35	32.37	13.65	0.93	1.32	1.13	4.4401	1.1459e-34	TCX2	KZV23929.1 hypothetical protein F511_23290 [Dorcoceras hygrometricum]
Unigene0025523	5.63	6.35	7.23	27.6	25.86	28.72	-2.09693	1.43635e-34	BHLH93	PIN21659.1 hypothetical protein CDL12_05642 [Handroanthus impetiginosus]
Unigene0025674	6.13	6.95	5.57	36.95	36.49	29.76	-2.4682	1.56943e-34	TCP4	ALE27662.1 TCP transcription factor CIN2A [Petrocosmea glabristoma]
Unigene0014420	12.94	13.07	12.05	0.64	0.92	0.79	4.01754	1.76717e-34	SPH2	PIN26862.1 hypothetical protein CDL12_00355 [Handroanthus impetiginosus]
Unigene0034629	97.87	73.23	110.73	612.8	636.63	521.17	-2.65134	1.96257e-34	RFS2	XP_011075230.1 probable galactinol--sucrose galactosyltransferase 2 [Sesamum indicum]
Unigene0021146	48.07	41.66	41.7	0.31	0.4	0	7.53226	2.94586e-34	LTP-2	XP_011097163.1 non-specific lipid-transfer protein 2 [Sesamum indicum]
Unigene0034212	10.34	14.11	16.72	0.09	0.23	0.2	6.30694	3.20939e-34	VIT_17s0000g00560	XP_012842760.1 PREDICTED: CASP-like protein 1F2 isoform X1 [Erythranthe guttata]
Unigene0011699	18.11	12.82	14.31	2.23	2.96	2.53	2.55093	3.72608e-34	dennd5b	XP_011083072.1 uncharacterized protein LOC105165685 [Sesamum indicum]
Unigene0000504	0.51	0.57	0.39	11.75	9.63	8.85	-4.36209	4.65405e-34	--	PIN14815.1 Alcohol O-acetyltransferase [Handroanthus impetiginosus]
Unigene0028276	33.16	63.91	83.74	5.05	4.31	6.37	3.52288	4.72852e-34	ER1	PIN23993.1 Serine/threonine protein kinase [Handroanthus impetiginosus]
Unigene0001045	1.99	3.12	3.42	24.71	28.25	23.27	-3.15974	4.92326e-34	ZIP3	KZV16608.1 zinc transporter 5-like [Dorcoceras hygrometricum]
Unigene0019243	149.32	179.23	143.04	63	56.74	65.43	1.34868	4.97543e-34	PAS2	GER50350.1 very-long-chain (3R)-3-hydroxyacyl-[acyl-carrierprotein] dehydratase PASTICCINO 2 [Striga asiatica]
Unigene0028239	28.29	32.71	33.43	9.08	10.75	9.89	1.66781	5.10208e-34	AHP1	GER32976.1 histidine-containing phosphotransfer protein [Striga asiatica]
Unigene0035926	0.81	0.89	0.55	9.24	10.15	9.87	-3.70093	5.77523e-34	At1g54200	TEY35736.1 hypothetical protein Saspl_030572 [Salvia splendens]
Unigene0028050	0.95	0.58	1.47	41.54	51.51	21.94	-5.2604	6.28526e-34	XTH33	XP_011071081.1 probable xyloglucan endotransglucosylase/hydrolase protein 33 [Sesamum indicum]
Unigene0028558	9.8	11.02	10.26	32.49	32.59	30.26	-1.6171	7.52315e-34	At5g14050	XP_012829019.1 PREDICTED: U3 small nucleolar RNA-associated protein 18 homolog [Erythranthe guttata]
Unigene0033714	2.07	1.1	2.38	21.51	24.5	20.75	-3.58842	7.91566e-34	PCMP-H58	XP_011083787.1 pentatricopeptide repeat-containing protein At5g50390, chloroplastic [Sesamum indicum]
Unigene0004810	0.16	0.2	0.29	6.12	4.96	8.25	-4.89426	7.91566e-34	IRK	XP_011095143.1 probable LRR receptor-like serine/threonine-protein kinase IRK isoform X1 [Sesamum indicum]
Unigene0031739	0.59	0.8	1.29	14.13	15.61	11.95	-3.9594	8.46714e-34	MCA1	XP_011099886.1 protein MID1-COMPLEMENTING ACTIVITY 1 [Sesamum indicum]
Unigene0001939	13.63	15.5	17.69	2.27	1.89	3.2	2.66935	8.47542e-34	SRS5	GER35510.1 lateral root primordium family protein [Striga asiatica]
Unigene0008496	29.46	34.34	30.86	10.7	13.48	11.81	1.39516	1.00487e-33	VIL1	XP_011093310.1 VIN3-like protein 1 [Sesamum indicum]
Unigene0032691	48.19	39.92	53.96	6.66	10.76	7.74	2.4974	1.02942e-33	STP13	XP_011090738.1 sugar transport protein 13 [Sesamum indicum]
Unigene0009853	0.38	0.31	0.28	10.08	9.6	14.07	-5.12076	1.06295e-33	TAR4	XP_012853023.1 PREDICTED: tryptophan aminotransferase-related protein 4-like isoform X1 [Erythranthe guttata]
Unigene0034053	1.13	0.29	0.27	35	24.11	29.02	-5.70454	1.14387e-33	LTPG1	XP_011086802.1 non-specific lipid transfer protein GPI-anchored 1 [Sesamum indicum]
Unigene0014269	41.02	49.26	45.76	135.14	129.57	140.51	-1.57467	1.20108e-33	PRO2	XP_011078238.1 profilin-3-like [Sesamum indicum]
Unigene0002885	15.42	16.47	17.54	5.11	3.94	5.62	1.75252	1.28066e-33	NET1B	PIN17785.1 E3 ubiquitin ligase involved in syntaxin degradation [Handroanthus impetiginosus]
Unigene0001824	0.11	0.26	0.29	9.59	6.15	9.09	-5.23347	1.34271e-33	GDPDL3	XP_011097815.1 glycerophosphodiester phosphodiesterase GDPDL3 [Sesamum indicum]
Unigene0025719	19.73	16.13	18.08	83.18	79.13	73.47	-2.12801	1.56286e-33	NHL6	PIN04792.1 hypothetical protein CDL12_22674 [Handroanthus impetiginosus]
Unigene0031203	0.74	1.12	1.21	10.58	10.33	12.64	-3.45	1.86168e-33	GATA1	XP_012829205.1 PREDICTED: GATA transcription factor 1-like [Erythranthe guttata]
Unigene0030273	379.54	388.84	370.43	127.17	151.13	167.43	1.35329	1.97899e-33	--	PIN12959.1 hypothetical protein CDL12_14419 [Handroanthus impetiginosus]
Unigene0016625	39.77	27.65	40.23	6.72	5.09	6.65	2.54387	2.45927e-33	--	GAU26268.1 hypothetical protein TSUD_224590 [Trifolium subterraneum]
Unigene0029999	3.43	2.85	3.32	16.55	14.7	18.08	-2.36136	2.51096e-33	LRP1	TEY27118.1 hypothetical protein Saspl_046057 [Salvia splendens]
Unigene0026178	25.02	23.24	38.11	2.22	1.1	2.85	3.80719	2.6964e-33	LECRK81	XP_011094691.1 L-type lectin-domain containing receptor kinase VIII.1 [Sesamum indicum]
Unigene0004348	44.61	47.65	42.71	17.06	19.37	18.08	1.30805	3.8736e-33	--	PIM98866.1 hypothetical protein CDL12_28650 [Handroanthus impetiginosus]
Unigene0031221	20.86	21.15	13.41	2.33	1.76	2.52	3.06768	4.36883e-33	CYP81Q32	XP_022843744.1 cytochrome P450 81E8-like [Olea europaea var. sylvestris] [Olea europaea]
Unigene0031883	1248.5	1107.67	1264.89	483.62	535.08	461.65	1.29047	5.3618e-33	BACOVA_02659	XP_011089012.2 uncharacterized protein LOC105170099 [Sesamum indicum]
Unigene0034839	6.02	5.65	6.92	29.37	29.45	32.05	-2.28928	5.68898e-33	JMT	PIN16622.1 Salicylate carboxymethyltransferase [Handroanthus impetiginosus]
Unigene0000585	42.32	42.77	49.51	174.87	162.62	145.34	-1.84284	6.44443e-33	At1g17230	XP_011082828.1 leucine-rich repeat receptor-like serine/threonine-protein kinase At1g17230 [Sesamum indicum]
Unigene0001666	0.9	0.84	0.98	15	13.21	9.17	-3.78059	6.52988e-33	ICR2	XP_011089861.2 interactor of constitutive active ROPs 3 [Sesamum indicum]
Unigene0010559	1.71	2.27	2.32	21.59	16.29	22.27	-3.25514	6.70149e-33	--	PIN13828.1 hypothetical protein CDL12_13556 [Handroanthus impetiginosus]
Unigene0021012	6.13	3.28	3.35	0.11	0.1	0.07	5.51006	7.08102e-33	TY3B-G	XP_028962178.1 LOW QUALITY PROTEIN: uncharacterized protein LOC114826270 [Malus domestica]
Unigene0017689	38.56	44.68	29.68	4.42	5.11	7.5	2.72915	7.33337e-33	VQ22	PIN26762.1 hypothetical protein CDL12_00481 [Handroanthus impetiginosus]
Unigene0017926	1.04	2.07	1.03	22.87	24.95	30.9	-4.24903	7.64109e-33	--	XP_012846049.1 PREDICTED: MLP-like protein 423 [Erythranthe guttata]
Unigene0009699	20.74	27.4	32.47	0.94	1.52	1.57	4.32211	8.00812e-33	--	-
Unigene0029780	3.75	2.09	1.91	30.93	31.32	30.16	-3.57578	9.66594e-33	At5g62930	PIN23534.1 Isoamyl acetate-hydrolyzing esterase [Handroanthus impetiginosus]
Unigene0000962	16.84	13.11	12.98	2.52	2.31	2.09	2.63314	1.22677e-32	EIF4A1	OVA08406.1 Helicase [Macleaya cordata]
Unigene0020022	15.14	14.32	19.6	2.66	1.87	2.52	2.79885	1.24652e-32	AAP1	XP_012857765.1 PREDICTED: amino acid permease 8-like isoform X2 [Erythranthe guttata]
Unigene0013703	2.15	2.46	1.39	21.4	21	28.13	-3.5552	1.25079e-32	--	XP_022862190.1 zinc finger protein CONSTANS-LIKE 2-like [Olea europaea var. sylvestris] [Olea europaea]
Unigene0036435	7.29	10.11	7.66	33.43	33.68	37.17	-2.057	1.35397e-32	HIPL1	XP_011086425.1 HIPL1 protein [Sesamum indicum]
Unigene0000662	14.33	15.92	13.01	1.8	2.47	1.22	2.97816	1.54881e-32	WRKY28	XP_009760855.1 PREDICTED: probable WRKY transcription factor 71 [Nicotiana sylvestris]
Unigene0017556	22.73	7.87	23.58	0.31	0.53	0.19	5.71704	1.54881e-32	NPF2.10	XP_011087209.1 protein NRT1/ PTR FAMILY 2.10-like [Sesamum indicum]
Unigene0010734	142.38	123.6	102.42	37.6	36.67	36.1	1.73892	1.78965e-32	AAE2	XP_011072225.1 probable acyl-activating enzyme 1, peroxisomal [Sesamum indicum]
Unigene0033742	35.54	35.08	34.54	13.92	14.27	14.21	1.31045	1.80945e-32	TIM23-1	GER53538.1 mitochondrial import inner membrane translocase [Striga asiatica]
Unigene0001359	4.28	3.07	2.16	31.79	36.13	30.26	-3.36791	1.92796e-32	APUM7	XP_011087879.1 putative pumilio homolog 7, chloroplastic [Sesamum indicum]
Unigene0011352	63.82	65.14	73.68	33.12	29.97	32.01	1.0914	1.9816e-32	ndhM	XP_011102142.1 probable receptor-like serine/threonine-protein kinase At5g57670 [Sesamum indicum]
Unigene0029441	23.03	11.77	21.06	0.26	0.48	0.12	6.02134	2.39554e-32	--	XP_011089496.1 suppressor of disruption of TFIIS [Sesamum indicum]
Unigene0028703	0.49	0.49	0.54	6.86	5.02	5.73	-3.53425	2.58219e-32	IRK	XP_011084816.1 probable LRR receptor-like serine/threonine-protein kinase IRK [Sesamum indicum]
Unigene0029644	39.75	34.35	36.49	9.69	8.86	6.88	2.12062	2.72385e-32	HIPP39	PSR93443.1 Heavy metal-associated isoprenylated plant protein [Actinidia chinensis var. chinensis] [Actinidia chinensis]
Unigene0011819	30.11	22.84	35.87	0.8	2.23	0.67	4.58529	3.33905e-32	--	XP_011072365.1 uncharacterized protein LOC105157642 [Sesamum indicum]
Unigene0024567	0.21	0.21	0.04	10.82	12.25	13.73	-6.32193	3.54729e-32	--	XP_022893672.1 probable serine/threonine-protein kinase nek3 isoform X1 [Olea europaea var. sylvestris] [Olea europaea]
Unigene0032599	27.68	24.95	34.36	128.55	133.19	155.95	-2.26351	3.71063e-32	TFT9	XP_011100204.1 14-3-3 protein 9 [Sesamum indicum]
Unigene0032047	32.18	36.64	32.25	15.5	15.4	16.76	1.0845	3.71623e-32	PDRP1	XP_022878015.1 pyruvate, phosphate dikinase regulatory protein 1, chloroplastic isoform X1 [Olea europaea var. sylvestris] [Olea europaea]
Unigene0031382	0.23	0.09	0.46	20.67	21.29	18.96	-6.2873	3.73227e-32	--	XP_011072631.1 uncharacterized protein LOC105157832 [Sesamum indicum]
Unigene0000095	29.13	31.46	28.62	9.72	11.22	12.62	1.41046	4.02084e-32	--	KAF3443873.1 hypothetical protein FNV43_RR13563 [Rhamnella rubrinervis]
Unigene0035583	5.5	4.15	5.02	32.64	28.71	36.41	-2.73638	4.11823e-32	SWEET12	GER48554.1 bidirectional sugar transporter SWEET12 [Striga asiatica]
Unigene0019128	2.44	1.68	2.08	16.1	16.88	17.67	-3.03022	4.22404e-32	asd	XP_011070557.1 uncharacterized protein LOC105156186 [Sesamum indicum]
Unigene0029697	3.35	3.44	4.87	28.02	29.95	40.61	-3.07973	4.44825e-32	WAG1	XP_011082827.1 serine/threonine-protein kinase WAG1 [Sesamum indicum]
Unigene0015422	0.31	0.19	0.39	18.29	18.07	20.24	-5.99085	4.8322e-32	--	PIN21062.1 hypothetical protein CDL12_06250 [Handroanthus impetiginosus]
Unigene0015727	0.36	0.49	0.47	12.75	11.78	19.81	-5.07	5.17786e-32	ATJ10	XP_011074793.1 chaperone protein dnaJ 10 [Sesamum indicum]
Unigene0015325	8.91	9.13	8	0.74	0.43	1.13	3.50102	5.19082e-32	GT6	PIN04620.1 UDP-glucuronosyl and UDP-glucosyl transferase [Handroanthus impetiginosus]
Unigene0027949	0.84	1.42	0.98	12.24	11.44	14.32	-3.55193	5.66342e-32	DOF3.6	XP_027069259.1 dof zinc finger protein DOF2.4 [Coffea arabica]
Unigene0034614	0.43	0.98	0.52	14.19	20.46	24.94	-4.9484	5.80179e-32	FAF3	XP_011090759.1 protein FANTASTIC FOUR 3 [Sesamum indicum]
Unigene0016828	16.23	11.46	9.88	0.35	0.45	0.33	5.05519	6.21771e-32	ACBP3	XP_011097232.1 acyl-CoA-binding domain-containing protein 3 [Sesamum indicum]
Unigene0030293	20.27	22.33	22.97	7.16	8.4	8.28	1.45965	7.24577e-32	MIEL1	XP_011079733.1 E3 ubiquitin-protein ligase MIEL1 [Sesamum indicum]
Unigene0023126	59.33	58.34	92.53	12.94	12.69	15.69	2.34685	7.40634e-32	CYP80B2	XP_012837735.1 PREDICTED: probable (S)-N-methylcoclaurine 3'-hydroxylase isozyme 2 [Erythranthe guttata]
Unigene0033192	1.72	2.36	2.35	11.82	11.86	11.67	-2.45882	7.67561e-32	--	PIN09320.1 hypothetical protein CDL12_18105 [Handroanthus impetiginosus]
Unigene0036594	1.12	0.66	0.9	9.37	9.83	10.96	-3.49233	8.17588e-32	PME32	PIN13646.1 Pectinesterase [Handroanthus impetiginosus]
Unigene0031789	36.83	26.53	27.76	232.54	212.11	170.59	-2.75531	8.18872e-32	PETE	XP_011083419.1 plastocyanin [Sesamum indicum]
Unigene0014105	63.39	76.41	73.21	32.85	32.67	37.04	1.05445	8.71127e-32	At2g40140	XP_011084902.1 zinc finger CCCH domain-containing protein 29 [Sesamum indicum]
Unigene0001230	7.85	6.91	5.04	0.22	0.47	0.4	4.1831	9.96535e-32	SFH13	PIN25120.1 Phosphatidylinositol transfer protein SEC14 [Handroanthus impetiginosus]
Unigene0029405	15.17	27.77	11.31	0.97	0.5	0.85	4.54743	1.05028e-31	MYB306	AKV71948.1 R2R3-MYB protein [Rehmannia glutinosa]
Unigene0018120	11.5	12.5	14.97	137.15	84.78	89.34	-2.99773	1.1169e-31	--	XP_011096310.1 uncharacterized protein LOC105175543 [Sesamum indicum]
Unigene0018713	0.04	0.09	0.09	23.38	13.64	28.05	-8.20835	1.12009e-31	DIT1	XP_022898300.1 dicarboxylate transporter 1, chloroplastic-like [Olea europaea var. sylvestris] [Olea europaea]
Unigene0026330	44.05	42.54	46.66	21.89	22.12	22.45	1.00358	1.27772e-31	FPS1	XP_022879277.1 farnesyl pyrophosphate synthase 1 [Olea europaea var. sylvestris] [Olea europaea]
Unigene0023694	85.97	94.16	93.8	213.97	227.05	224.72	-1.28115	1.3902e-31	BETV6	XP_022865307.1 isoflavone reductase-like protein [Olea europaea var. sylvestris] [Olea europaea]
Unigene0030048	15.21	14.95	16.19	63.22	72.41	60.31	-2.07977	1.41683e-31	--	-
Unigene0007644	23.34	21.83	26.68	5.77	5.7	3.74	2.23997	1.43994e-31	MORC6	XP_011071897.1 protein MICRORCHIDIA 6 [Sesamum indicum]
Unigene0013982	3.89	6.21	4.78	35.04	32.26	48.22	-2.9567	1.43994e-31	CIPK32	PIN17466.1 Serine/threonine protein kinase [Handroanthus impetiginosus]
Unigene0024423	100.31	103.57	79.11	27.72	28.86	21.71	1.85385	1.45757e-31	ARF18	XP_011089288.1 auxin response factor 18 isoform X2 [Sesamum indicum]
Unigene0023359	12.77	13.94	12.67	0.18	0.16	0.69	5.25675	1.49227e-31	--	PIN21106.1 hypothetical protein CDL12_06207 [Handroanthus impetiginosus]
Unigene0036481	2.02	5.95	7.73	112.16	133.74	109.92	-4.50231	1.50344e-31	NIP2-1	PSS30464.1 Aquaporin NIP2-1 like [Actinidia chinensis var. chinensis] [Actinidia chinensis]
Unigene0019117	6.71	6.81	7.83	0.61	0.61	0.9	3.3321	1.63691e-31	TBL10	XP_011090776.1 protein trichome birefringence-like 10 [Sesamum indicum]
Unigene0027265	101.26	115.49	99.12	38.76	44.22	47.55	1.27495	2.06714e-31	TPR1	XP_011092107.1 topless-related protein 3 [Sesamum indicum]
Unigene0024759	2.71	3.33	5.37	46.31	33.32	45.14	-3.4509	2.08979e-31	RAD	ARW29629.1 RADIALIS-like transcription factor [Torenia fournieri]
Unigene0028633	0.82	0.54	0.61	7.02	6.03	6.59	-3.31753	2.14038e-31	ABCG14	TEY61979.1 hypothetical protein Saspl_009246 [Salvia splendens]
Unigene0023645	23.98	18.77	18.17	5.15	5.56	4.52	2	2.15536e-31	BBE1	XP_011071422.1 reticuline oxidase-like [Sesamum indicum]
Unigene0026759	2.17	1.99	2.78	16.47	21.05	22.55	-3.11364	2.54735e-31	TET6	XP_011076998.1 tetraspanin-6 [Sesamum indicum]
Unigene0029410	26.16	36.64	23.05	3.4	4.36	5.09	2.74005	2.61353e-31	Os04g0179200	XP_011094269.1 secoisolariciresinol dehydrogenase-like [Sesamum indicum]
Unigene0034121	1.31	2.35	1.62	17.71	14.59	21.01	-3.3358	2.79698e-31	--	XP_011071926.1 uncharacterized protein LOC105157258 [Sesamum indicum]
Unigene0000533	2.46	3.79	3.4	22.63	20.24	27.19	-2.85999	3.19123e-31	BASS1	XP_012836511.1 PREDICTED: probable sodium/metabolite cotransporter BASS1, chloroplastic [Erythranthe guttata]
Unigene0006474	2.13	2.11	1.26	19.64	19.76	30.86	-3.6752	3.8197e-31	--	GAY36254.1 hypothetical protein CUMW_020940 [Citrus unshiu]
Unigene0030616	187.28	190.95	182.29	448.61	470.36	462.04	-1.30089	4.34966e-31	DIR7	PIN19183.1 hypothetical protein CDL12_08182 [Handroanthus impetiginosus]
Unigene0026886	43.73	45.91	39.71	15.98	16.8	18.83	1.32556	4.37477e-31	CYP94A1	PIN04067.1 Cytochrome P450 CYP4/CYP19/CYP26 subfamily [Handroanthus impetiginosus]
Unigene0035391	1624.75	2002.43	938.2	131.4	144.8	221.12	3.19849	4.4089e-31	At2g43860	XP_011085052.1 polygalacturonase-like [Sesamum indicum]
Unigene0026382	1.11	2.05	1.06	16.24	13.61	18.02	-3.50381	6.34633e-31	AUX28	TEY33441.1 auxin-responsive protein IAA [Salvia splendens]
Unigene0012063	20.14	22.23	12.92	1.17	2.18	1.9	3.39663	8.04942e-31	ZOG1	XP_011075345.1 zeatin O-glucosyltransferase-like [Sesamum indicum]
Unigene0023815	7.49	6.64	3.88	59.62	52.6	56.23	-3.22545	8.58953e-31	IAA4/5	XP_011079948.1 auxin-induced protein 22D-like [Sesamum indicum]
Unigene0008365	4259.83	4438.27	3783.19	1699.54	1891.26	2013.79	1.15509	9.93073e-31	--	TEY60938.1 hypothetical protein Saspl_033217 [Salvia splendens]
Unigene0032377	0.1	0.53	0.36	13.3	10.1	15.31	-5.28913	1.01391e-30	ICR4	XP_011082868.1 interactor of constitutive active ROPs 1-like [Sesamum indicum]
Unigene0004411	6.69	7.03	7.6	2.12	1.69	1.88	1.90571	1.05147e-30	CLF	XP_011099117.1 histone-lysine N-methyltransferase CLF isoform X2 [Sesamum indicum]
Unigene0026126	11.58	11.97	12.7	40.08	44.52	38.81	-1.76741	1.08298e-30	SRM1	XP_011070471.1 transcription factor SRM1 [Sesamum indicum]
Unigene0001297	1.79	1.09	0.47	30.48	28.03	36.74	-4.82949	1.12262e-30	ARG7	XP_020551504.1 auxin-induced protein 15A-like [Sesamum indicum]
Unigene0007441	5.93	7.43	6.72	23.05	22.81	25.33	-1.82592	1.28518e-30	TBL5	XP_011069938.1 protein trichome birefringence-like 5 [Sesamum indicum]
Unigene0025556	7.27	8.78	7.86	0.91	1.44	0.82	2.91506	1.39929e-30	--	PIM97845.1 Glutaredoxin [Handroanthus impetiginosus]
Unigene0024478	0.69	1.08	0.95	7.14	7.36	7.75	-3.03213	1.40026e-30	HAT4	XP_011089804.1 homeobox-leucine zipper protein HAT4 [Sesamum indicum]
Unigene0029274	9.29	11.68	7.01	1.02	1.67	1.3	2.80994	1.45248e-30	ABCB9	PIN04048.1 Multidrug/pheromone exporter, ABC superfamily [Handroanthus impetiginosus]
Unigene0025099	74.9	54.02	69.51	432.25	404.2	321.18	-2.54447	1.58905e-30	PATL3	XP_022850270.1 patellin-3-like [Olea europaea var. sylvestris] [Olea europaea]
Unigene0018062	0.17	0.21	0.43	16.34	9.12	17	-5.71204	1.59894e-30	GLK2	XP_022848511.1 transcription activator GLK1-like [Olea europaea var. sylvestris] [Olea europaea]
Unigene0030797	35.03	30.6	27.37	137.8	123.97	125.32	-2.05737	1.79099e-30	VATE	XP_011090319.1 V-type proton ATPase subunit E [Sesamum indicum]
Unigene0024541	402.99	348.38	305.88	1455.4	1370.83	1405.84	-2.00105	1.85425e-30	SUC2	ACX33146.1 sucrose transporter 1 [Verbascum phoeniceum]
Unigene0014349	61.48	63.94	72.03	18.19	15.5	23.44	1.78917	2.17699e-30	PLC4	ABU53666.1 phospholipase C [Torenia fournieri]
Unigene0000324	0.2	0.16	0.6	27.68	16.95	17.79	-6.02283	2.32142e-30	UGT29	XP_011090910.1 beta-D-glucosyl crocetin beta-1,6-glucosyltransferase-like [Sesamum indicum]
Unigene0017275	12.95	12.36	17.86	1.44	1.55	0.83	3.49838	2.43402e-30	ERF5	XP_011101098.1 ethylene-responsive transcription factor 5 [Sesamum indicum]
Unigene0006052	0.5	0.16	0.6	12.16	10	14.98	-4.88148	2.53876e-30	BAG1	XP_027081065.1 BAG family molecular chaperone regulator 1-like [Coffea arabica]
Unigene0029651	2.35	3.74	2.25	18.52	17.51	20.84	-2.76955	3.11942e-30	MUCI21	XP_011075340.1 uncharacterized protein LOC105159835 [Sesamum indicum]
Unigene0034905	0.72	0.97	1.13	22.04	15.91	17.58	-4.2995	3.18144e-30	FLZ14	PIN01530.1 hypothetical protein CDL12_25961 [Handroanthus impetiginosus]
Unigene0011044	6.23	5.21	3.5	0.1	0.16	0.11	5.33551	3.24302e-30	MYB63	XP_011086359.1 transcription factor MYB63 [Sesamum indicum]
Unigene0024027	3.52	3.78	3.8	14.94	14.02	16.12	-2.02193	3.50749e-30	--	XP_012849137.1 PREDICTED: uncharacterized protein LOC105968968 [Erythranthe guttata]
Unigene0010583	53.27	50.09	54.79	149.11	143.37	144.86	-1.46746	3.76496e-30	SCAB2	XP_011079083.1 stomatal closure-related actin-binding protein 3 [Sesamum indicum]
Unigene0024064	41.78	52.54	31.48	8.35	10.39	9.22	2.1697	4.11854e-30	--	PIN05667.1 hypothetical protein CDL12_21789 [Handroanthus impetiginosus]
Unigene0031535	31.94	42.46	39.42	6.95	7.44	10.41	2.19834	4.1508e-30	--	XP_011073513.1 uncharacterized protein LOC105158445 [Sesamum indicum]
Unigene0012829	0.62	0.36	0.51	6.17	6.72	5.91	-3.65735	4.23049e-30	At2g23200	XP_012853739.1 PREDICTED: probable receptor-like protein kinase At5g24010 [Erythranthe guttata]
Unigene0029713	136.65	112.72	115.86	49.02	45.49	45.4	1.38431	4.34907e-30	At1g06620	XP_017974608.1 PREDICTED: uncharacterized protein LOC18603192 [Theobroma cacao]
Unigene0005978	1.57	2.21	1.78	31.63	18.13	37.8	-3.97712	5.40646e-30	GLO1	PIN15887.1 Glycolate oxidase [Handroanthus impetiginosus]
Unigene0009997	3.49	3.29	2.55	22.68	19.04	20.13	-2.72882	5.80924e-30	CHLI	XP_011096413.1 magnesium-chelatase subunit ChlI, chloroplastic-like [Sesamum indicum]
Unigene0034353	0.62	1.06	1.04	28.6	28.89	22.06	-4.87018	6.56777e-30	pKIWI504	XP_011077472.1 metallothionein-like protein type 2 [Sesamum indicum]
Unigene0023805	15.88	15.07	19.39	4.13	3.73	3.78	2.11261	7.38814e-30	IP5P8	PIN11195.1 Inositol polyphosphate 5-phosphatase [Handroanthus impetiginosus]
Unigene0033207	23.06	20.83	23.28	74.48	71.66	70.84	-1.69167	8.18249e-30	PETH	TEY44591.1 ferredoxin--NADP+ reductase [Salvia splendens]
Unigene0009767	0.24	0.4	0.2	10.73	8.84	9.29	-5.10254	9.25656e-30	--	XP_011091510.1 uncharacterized protein LOC105171936 [Sesamum indicum]
Unigene0001579	3.97	4.51	2.89	43.55	45.05	71.3	-3.81387	9.33482e-30	PGR5	XP_011091252.1 protein PROTON GRADIENT REGULATION 5, chloroplastic [Sesamum indicum]
Unigene0033244	106.33	156.3	91.21	23.79	27.6	28.83	2.14106	1.08951e-29	URGT6	PIN26882.1 Glucose-6-phosphate/phosphate and phosphoenolpyruvate/phosphate antiporter [Handroanthus impetiginosus]
Unigene0026167	40.68	38.27	40.2	15.64	15.86	18.5	1.25278	1.09031e-29	--	XP_011088515.1 uncharacterized protein LOC105169721 [Sesamum indicum]
Unigene0013077	34.35	26.56	41.74	3.88	5.29	3.82	2.98226	1.12429e-29	--	EYU36368.1 hypothetical protein MIMGU_mgv1a017259mg [Erythranthe guttata]
Unigene0021351	2.08	2.02	2.32	11.48	13.15	14.92	-2.62303	1.14343e-29	--	XP_011094252.1 vegetative cell wall protein gp1-like [Sesamum indicum]
Unigene0000836	0.53	0.86	2.57	266.24	262.8	435.67	-7.92845	1.23886e-29	--	TEY24291.1 hypothetical protein Saspl_043439 [Salvia splendens]
Unigene0023951	0.34	0.51	0.28	18.45	17.53	25.68	-5.76994	1.39992e-29	--	-
Unigene0025037	4.71	4.15	3.36	26.7	28.52	22.41	-2.66737	1.39992e-29	CER2	PIN19717.1 Shikimate O-hydroxycinnamoyltransferase [Handroanthus impetiginosus]
Unigene0022328	119.93	103.83	101.62	39.59	41.79	34.33	1.49161	1.49607e-29	APA1	XP_011096039.2 aspartic proteinase-like [Sesamum indicum]
Unigene0014014	4.21	4.71	5.99	0.64	0.52	0.4	3.25666	1.56319e-29	PUB52	EYU20190.1 hypothetical protein MIMGU_mgv1a001539mg [Erythranthe guttata]
Unigene0030435	50.12	53.6	49.65	135.58	136.76	156.19	-1.48238	1.9219e-29	PILS2	XP_022843958.1 protein PIN-LIKES 2-like [Olea europaea var. sylvestris] [Olea europaea]
Unigene0029041	7.7	8.36	10.6	0.83	1.08	0.92	3.2358	1.9864e-29	ARR9	PIN18316.1 hypothetical protein CDL12_09021 [Handroanthus impetiginosus]
Unigene0033908	17.34	12.55	10.52	100.63	89.78	87.61	-2.7824	2.07245e-29	MENB	TEY87090.1 naphthoate synthase [Salvia splendens]
Unigene0001329	13.54	18.35	9.45	0.69	0.94	1.45	3.74654	2.13427e-29	ABF2	XP_011083869.1 bZIP transcription factor 23 [Sesamum indicum]
Unigene0031040	9.45	16.09	20.95	1.43	1.64	1.93	3.21692	2.966e-29	At3g47420	PIN22398.1 Permease of the major facilitator superfamily [Handroanthus impetiginosus]
Unigene0002594	282.75	261.63	220.01	95.16	102.92	96.4	1.37614	3.14619e-29	P4H10	PIN07833.1 Prolyl 4-hydroxylase alpha subunit [Handroanthus impetiginosus]
Unigene0028032	23.27	22.52	17.21	4.61	4.55	5.85	2.06943	3.20535e-29	ARR2	PSR97990.1 Two-component response regulator like [Actinidia chinensis var. chinensis] [Actinidia chinensis]
Unigene0033699	33.89	32.7	41.43	14.07	13.83	12.87	1.40572	3.2501e-29	HSL2	KZV21326.1 hypothetical protein F511_24507 [Dorcoceras hygrometricum]
Unigene0000247	48.38	63.66	37.48	7.22	10.37	9.58	2.46025	3.31792e-29	--	XP_012831835.1 PREDICTED: uncharacterized protein LOC105952801 isoform X2 [Erythranthe guttata]
Unigene0024618	0.94	1.01	1.29	12.29	12.41	16.21	-3.65839	3.34538e-29	AUX1	PIN17186.1 Amino acid transporter [Handroanthus impetiginosus]
Unigene0027281	41.55	35.13	41.29	176.01	140.52	153.41	-1.99406	3.41759e-29	HMA4	PIN10351.1 Cation transport ATPase [Handroanthus impetiginosus]
Unigene0004848	0.66	0.69	0.39	5.75	7.11	7.37	-3.53934	3.62831e-29	MRS2-I	PIN15915.1 Magnesium transporters: CorA family [Handroanthus impetiginosus]
Unigene0030900	2.11	3.03	2.32	26.8	31.73	19.22	-3.3816	3.67799e-29	PGIP1	XP_022861759.1 polygalacturonase inhibitor-like [Olea europaea var. sylvestris] [Olea europaea]
Unigene0029477	14.79	12.6	13.78	50.49	46.24	52.34	-1.85632	3.71948e-29	At1g75220	XP_011074551.1 sugar transporter ERD6-like 6 [Sesamum indicum]
Unigene0006055	2.19	2.38	4.53	44	38.6	29.59	-3.62393	3.75783e-29	At4g27290	XP_011097953.1 G-type lectin S-receptor-like serine/threonine-protein kinase At4g27290 [Sesamum indicum]
Unigene0004535	91.81	91.63	95.85	45.43	36.66	43.51	1.15293	3.77498e-29	SPS1	O04932.1 RecName: Full=Probable sucrose-phosphate synthase 1; AltName: Full=UDP-glucose-fructose-phosphate glucosyltransferase 1 [Craterostigma plantagineum]
Unigene0018593	3.12	4.52	3.02	23.89	25.85	33.89	-2.97181	4.28468e-29	PDX1	PIN25442.1 Stationary phase-induced protein, SOR/SNZ family [Handroanthus impetiginosus]
Unigene0008656	6.11	5.47	11.3	0.19	0.28	0.24	5.01012	5.02758e-29	RAM1	PIN04940.1 hypothetical protein CDL12_22526 [Handroanthus impetiginosus]
Unigene0027238	0.28	0.23	0.39	6.41	5.18	5.35	-4.23437	6.91413e-29	IP5P4	XP_011079882.1 type I inositol polyphosphate 5-phosphatase 4 [Sesamum indicum]
Unigene0030578	3.54	3.82	3.55	22.6	29.81	31.57	-2.94439	7.01572e-29	--	XP_011092920.1 uncharacterized protein LOC105172990 [Sesamum indicum]
Unigene0027270	0.16	0.13	0.41	13.73	10.49	11.86	-5.6877	7.03926e-29	--	-
Unigene0034638	0.43	0.26	0.27	10.72	12.31	9.39	-5.07771	7.22859e-29	At3g28050	PIN23556.1 hypothetical protein CDL12_03719 [Handroanthus impetiginosus]
Unigene0019984	0.91	1.11	1.79	16.42	13.88	21.9	-3.77619	7.653e-29	KO	XP_012845463.1 PREDICTED: ent-kaurene oxidase, chloroplastic [Erythranthe guttata]
Unigene0010265	10.36	12.58	10.79	2.79	2.18	2.86	2.10695	8.03236e-29	--	PIN07498.1 hypothetical protein CDL12_19935 [Handroanthus impetiginosus]
Unigene0000207	31.54	36.24	30.39	10.98	12.42	13.35	1.41754	8.24425e-29	--	GER38456.1 galactose oxidase/kelch repeat superfamily protein [Striga asiatica]
Unigene0028599	14.35	18.45	16.15	5.27	5.94	5.18	1.57849	8.63698e-29	--	-
Unigene0030529	3.7	3.35	3.73	0.24	0.17	0.17	4.21616	8.71904e-29	BEL1	XP_018829277.1 PREDICTED: homeobox protein BEL1 homolog isoform X1 [Juglans regia]
Unigene0030184	0.53	0.52	0.39	6.23	6.38	6.66	-3.74222	8.76137e-29	NIK2	XP_011070875.1 protein NSP-INTERACTING KINASE 2-like [Sesamum indicum]
Unigene0010822	2.72	2.73	3.54	14.48	15.21	17.96	-2.40608	9.20862e-29	At5g39865	XP_020548998.1 uncharacterized protein At5g39865 [Sesamum indicum]
Unigene0035930	53.39	44.98	29.25	5.56	7.51	5.86	2.75311	9.4738e-29	ATL42	KAA8523148.1 hypothetical protein F0562_009571 [Nyssa sinensis]
Unigene0032294	0.25	0.3	0.63	17.89	12.42	13.36	-5.20978	9.59383e-29	CURT1A	XP_012835660.1 PREDICTED: protein CURVATURE THYLAKOID 1A, chloroplastic [Erythranthe guttata]
Unigene0025319	15.03	13.79	14.47	6.04	6.19	6.51	1.20791	1.09032e-28	FRK2	XP_012837491.1 PREDICTED: uncharacterized protein LOC105958036 [Erythranthe guttata]
Unigene0000499	1.73	1.65	2.15	10.7	8.71	10.33	-2.42705	1.47304e-28	PHYB	XP_016441820.1 PREDICTED: phytochrome B [Nicotiana tabacum]
Unigene0001906	0.15	0.23	0.22	8.93	6.94	6.96	-5.24982	1.55779e-28	BACOVA_02659	XP_011080690.1 uncharacterized protein LOC105163879 isoform X1 [Sesamum indicum]
Unigene0031962	94.37	134.31	83.39	20.5	23.61	14.91	2.40259	1.72555e-28	JA2L	PIN22627.1 hypothetical protein CDL12_04665 [Handroanthus impetiginosus]
Unigene0024937	0.38	0.11	0	12.54	10.98	13.9	-6.25488	1.91679e-28	BZIP61	PIN20885.1 hypothetical protein CDL12_06441 [Handroanthus impetiginosus]
Unigene0019498	0.19	0.15	0.15	21.2	14.88	29.96	-7.07441	2.03715e-28	DOGL3	XP_011101404.1 protein DELAY OF GERMINATION 1 [Sesamum indicum]
Unigene0004761	8.26	8.45	8.71	84.17	61.84	50.54	-2.95086	2.33185e-28	REM1.4	XP_020549033.1 remorin-like isoform X2 [Sesamum indicum]
Unigene0035572	46.52	52.04	41.28	15.51	18.54	14.78	1.51794	2.57588e-28	RVE1	XP_020548215.1 protein REVEILLE 7-like isoform X2 [Sesamum indicum]
Unigene0000562	19.37	11.76	18.83	118.65	107.25	107.77	-2.73958	2.60438e-28	CML41	XP_011083746.1 probable calcium-binding protein CML41 [Sesamum indicum]
Unigene0013321	0.1	0.06	0.39	15.83	10.77	13.74	-6.19664	2.62977e-28	COMT	QAX90949.1 caffeic acid O-methyltransferase [Catalpa bungei]
Unigene0030566	6.59	7.15	5.97	25.46	22.89	25.03	-1.89646	2.77924e-28	SIGC	XP_011081724.1 RNA polymerase sigma factor sigC isoform X2 [Sesamum indicum]
Unigene0026666	0.13	0.05	0.11	29.67	20.18	11.78	-7.73144	2.89263e-28	UGT85A8	PIN10984.1 UDP-glucuronosyl and UDP-glucosyl transferase [Handroanthus impetiginosus]
Unigene0021633	12.27	14.48	13.38	2.91	3.76	4.19	1.88566	2.92603e-28	SUC4	XP_012841262.1 PREDICTED: sucrose transport protein SUC4 [Erythranthe guttata]
Unigene0026781	483.67	202.22	325.73	2.32	4.55	1.27	6.95742	3.08746e-28	AS	PIN25447.1 Asparagine synthase (glutamine-hydrolyzing) [Handroanthus impetiginosus]
Unigene0023834	0.22	0.1	0.59	12.68	11.87	8.81	-5.19611	3.40286e-28	At1g14390	PIN25330.1 Serine/threonine protein kinase [Handroanthus impetiginosus]
Unigene0020496	7.64	7.32	8.15	25.23	23.21	22.5	-1.61808	3.7646e-28	FAB1B	XP_011072684.1 1-phosphatidylinositol-3-phosphate 5-kinase FAB1B isoform X1 [Sesamum indicum]
Unigene0025127	11.43	11.93	11.25	29.51	31.03	30.81	-1.40022	3.7857e-28	UGE2	XP_011074434.1 UDP-glucose 4-epimerase GEPI48 [Sesamum indicum]
Unigene0025402	14.12	15.58	16.52	42.61	41.85	45.73	-1.49403	4.10305e-28	RPL10A	XP_011090346.1 60S ribosomal protein L10a-1 [Sesamum indicum]
Unigene0007628	17.82	21	17.65	6.24	7.89	7.49	1.38512	4.386e-28	At5g35170	XP_011078588.1 adenylate kinase 5, chloroplastic isoform X3 [Sesamum indicum]
Unigene0018296	70.53	67.68	36.73	7.01	9.79	7.54	2.84546	4.57409e-28	--	XP_011070317.1 uncharacterized protein LOC105156004 [Sesamum indicum]
Unigene0026112	10.2	10.09	13.05	3.85	4.08	3.45	1.55075	4.9497e-28	CCB4	PIN18034.1 hypothetical protein CDL12_09290 [Handroanthus impetiginosus]
Unigene0008339	3.53	3.97	6.58	77.31	81.59	41.91	-3.83411	5.18257e-28	CYP92C6	PIN02944.1 Cytochrome P450 CYP2 subfamily [Handroanthus impetiginosus]
Unigene0003072	6.95	5.35	6.53	31.38	30.58	27.52	-2.24853	5.20413e-28	FLA2	PIN17451.1 hypothetical protein CDL12_09892 [Handroanthus impetiginosus]
Unigene0033067	0.15	0	0.04	31.59	26.18	25.42	-8.77427	5.29164e-28	PDLP8	XP_011090433.1 LOW QUALITY PROTEIN: cysteine-rich repeat secretory protein 15 [Sesamum indicum]
Unigene0026359	0.04	0.09	0.22	8.91	7.48	8.88	-6.17393	5.31956e-28	At3g47200	XP_011099100.1 UPF0481 protein At3g47200 [Sesamum indicum]
Unigene0014127	21.43	23.48	22.73	10.12	9.22	9.04	1.253	5.38356e-28	At1g16220	TEY69981.1 hypothetical protein Saspl_017389 [Salvia splendens]
Unigene0028566	1.45	1.79	1.34	8.7	8.22	8.4	-2.46686	5.39639e-28	--	CDP06169.1 unnamed protein product [Coffea canephora]
Unigene0010960	0.76	0.62	0.99	14.41	15.04	15.4	-4.24215	5.7965e-28	--	XP_011094512.1 uncharacterized protein LOC105174187 [Sesamum indicum]
Unigene0032539	26.51	24.33	26.05	101.79	105.69	83.1	-1.91807	5.83164e-28	--	PIN10548.1 hypothetical protein CDL12_16860 [Handroanthus impetiginosus]
Unigene0034676	3.52	4.82	6.92	51.37	35.26	50.27	-3.1653	6.70079e-28	BGLU11	EYU26894.1 hypothetical protein MIMGU_mgv1a007433mg [Erythranthe guttata]
Unigene0030704	7.02	8.58	5.96	31.96	30	37.19	-2.20126	7.01798e-28	HAK11	XP_012829724.1 PREDICTED: potassium transporter 10 [Erythranthe guttata]
Unigene0003063	1.08	0.96	2.69	30.7	27.91	44.01	-4.43933	7.80771e-28	GALM	XP_011098592.1 aldose 1-epimerase [Sesamum indicum]
Unigene0032137	8.21	9.48	9.34	1.54	0.8	1.51	2.81163	8.52721e-28	ATL46	XP_020554963.1 RING-H2 finger protein ATL46-like [Sesamum indicum]
Unigene0004903	0.16	0.04	0.16	13.43	6.38	11.05	-6.4216	9.07093e-28	BGAL3	PIN16631.1 Beta-galactosidase [Handroanthus impetiginosus]
Unigene0000020	5.85	6.4	6.63	16.28	16.03	16.55	-1.3718	9.1226e-28	XI-F	PSS24532.1 Myosin-12 like isoform 2 [Actinidia chinensis var. chinensis] [Actinidia chinensis]
Unigene0009809	4.11	4.08	4.34	0.6	0.69	0.55	2.76761	9.52046e-28	CRY2	PIN22456.1 Deoxyribodipyrimidine photolyase/cryptochrome [Handroanthus impetiginosus]
Unigene0001475	11.44	13.19	11.18	2.55	3.76	3.24	1.90679	9.55716e-28	TCX2	XP_011090684.1 LOW QUALITY PROTEIN: protein tesmin/TSO1-like CXC 2 [Sesamum indicum]
Unigene0001409	0.48	0.45	0.59	12.64	8.15	8.15	-4.25092	1.0127e-27	Bp10	XP_011085509.1 L-ascorbate oxidase homolog [Sesamum indicum]
Unigene0024066	111.51	147.28	280.22	22.95	17.8	19.45	3.16248	1.1229e-27	NCED1	XP_011082846.1 9-cis-epoxycarotenoid dioxygenase NCED1, chloroplastic [Sesamum indicum]
Unigene0035440	4.68	4.57	6.02	43.16	38.84	27.1	-2.83688	1.26287e-27	--	XP_011079570.1 uncharacterized protein LOC105163060 [Sesamum indicum]
Unigene0010878	12.18	16.89	13.02	2.88	3.02	3.25	2.20163	1.41542e-27	GATA5	XP_012853575.1 PREDICTED: GATA transcription factor 5 isoform X1 [Erythranthe guttata]
Unigene0008125	1.81	4.77	3.33	33.94	31.66	34.88	-3.34188	1.47223e-27	--	KZV17734.1 hypothetical protein F511_01543 [Dorcoceras hygrometricum]
Unigene0017912	10.88	7.21	13.84	1.02	0.76	0.58	3.75805	1.51903e-27	CYCD1-1	XP_011086502.1 cyclin-D1-1 [Sesamum indicum]
Unigene0033159	6.55	8.94	4.64	46.53	47.16	61.16	-2.94345	1.5266e-27	PHO1;H3	XP_011098656.1 phosphate transporter PHO1 homolog 9 [Sesamum indicum]
Unigene0006866	4.72	4.52	4.7	19.83	18.74	20.43	-2.08148	1.59629e-27	At1g32860	XP_011078399.1 glucan endo-1,3-beta-glucosidase 11 isoform X1 [Sesamum indicum]
Unigene0021025	46.87	50.16	55.01	20.52	20.04	20.05	1.32682	1.6242e-27	--	-
Unigene0028830	0.05	0.17	0	25.8	23.29	22.57	-8.34752	1.64945e-27	UGT84A13	PIN07991.1 UDP-glucuronosyl and UDP-glucosyl transferase [Handroanthus impetiginosus]
Unigene0026115	1.46	1.45	1.89	7.23	6.69	7.8	-2.17792	1.85627e-27	CSI1	XP_011097604.1 LOW QUALITY PROTEIN: protein CELLULOSE SYNTHASE INTERACTIVE 1-like [Sesamum indicum]
Unigene0009029	2.91	4.08	3.11	14.92	14.64	18.45	-2.24898	1.93186e-27	At5g66150	XP_011099865.1 alpha-mannosidase [Sesamum indicum]
Unigene0024658	6.48	5.8	3.51	38.49	37.35	39.67	-2.87093	1.96816e-27	BEE2	XP_012847836.1 PREDICTED: transcription factor HBI1-like [Erythranthe guttata]
Unigene0030571	3.14	3.07	4.52	25.02	23.82	20.95	-2.70137	1.96878e-27	BAN	EYU40026.1 hypothetical protein MIMGU_mgv1a009197mg [Erythranthe guttata]
Unigene0011624	5.87	4.03	4.35	36.07	29.57	42.99	-2.93039	2.02358e-27	EXPA10	AVT44073.1 EXPA6 [Osmanthus fragrans]
Unigene0029283	12.5	13.41	11.67	3.83	4.47	3.83	1.63139	2.05856e-27	THA8	XP_011088727.1 pentatricopeptide repeat-containing protein At1g62350 isoform X1 [Sesamum indicum]
Unigene0020023	1.03	1.36	1.3	17.01	20.94	15.56	-3.85812	2.15538e-27	FLZ15	GER52170.1 hypothetical protein STAS_29591 [Striga asiatica]
Unigene0032643	18.37	17.92	30.47	2.87	2.18	3.14	3.02705	2.21542e-27	YAB1	XP_011090395.1 axial regulator YABBY 1 [Sesamum indicum]
Unigene0036450	1.03	0.99	0.84	10.08	6.72	10.99	-3.28048	2.24971e-27	--	XP_011072157.1 uncharacterized protein LOC105157447 [Sesamum indicum]
Unigene0025280	10.81	9.74	9.13	1.07	0.74	0.32	3.80057	2.25596e-27	--	-
Unigene0027260	10.7	9.38	8.23	2.1	1.61	2.34	2.2263	2.4398e-27	NEAP2	QCE07229.1 hypothetical protein DEO72_LG9g2246 [Vigna unguiculata]
Unigene0001411	10.28	10.12	12.3	3.23	2.29	2.95	1.94886	2.44406e-27	ORP2A	XP_011070101.1 oxysterol-binding protein-related protein 2A isoform X1 [Sesamum indicum]
Unigene0005954	0.89	1.09	0.91	7.36	7.25	7.11	-2.90988	2.52749e-27	ZFP4	XP_011092517.1 histone deacetylase 6 [Sesamum indicum]
Unigene0016712	2.13	2.66	1.22	24.51	20.95	31.99	-3.68783	2.5935e-27	CYCU4-1	XP_022866013.1 cyclin-U4-1-like [Olea europaea var. sylvestris] [Olea europaea]
Unigene0002588	2.99	2.26	3.11	14.76	15.77	14.17	-2.4187	2.62679e-27	ATJ20	XP_011084204.1 chaperone protein dnaJ 20, chloroplastic-like [Sesamum indicum]
Unigene0030959	316.18	280.51	321.37	121.04	126.74	98.6	1.40623	2.70955e-27	OPT4	XP_011087976.1 oligopeptide transporter 4 [Sesamum indicum]
Unigene0001831	10.14	9.83	12.46	0.16	0.35	0.06	5.83022	2.74952e-27	ATL20	XP_020552781.1 RING-H2 finger protein ATL20-like isoform X1 [Sesamum indicum]
Unigene0021622	17.86	27.74	23.92	0.09	0	0.6	6.65469	2.75208e-27	LTP1	ABP01769.1 lipid transfer protein 2 [Salvia miltiorrhiza]
Unigene0003324	1.56	1.52	0.86	12.74	17.15	12.32	-3.42132	2.83493e-27	--	-
Unigene0025521	0.27	0.22	0.15	23.26	21.5	24.97	-6.76756	2.89138e-27	--	PSR93443.1 Heavy metal-associated isoprenylated plant protein [Actinidia chinensis var. chinensis] [Actinidia chinensis]
Unigene0002113	1.04	1.53	2	17.87	12.12	15.64	-3.31972	3.11808e-27	RLK902	XP_011099906.1 probable inactive receptor kinase At1g48480 [Sesamum indicum]
Unigene0025073	2.92	3.36	3.35	0.06	0.08	0.13	5.1565	3.33189e-27	--	-
Unigene0023063	8.63	12	5.74	72.86	67.1	90.12	-3.12517	3.50651e-27	ATPG	XP_020550222.1 ATP synthase subunit b', chloroplastic [Sesamum indicum]
Unigene0031169	0.67	0.53	0.31	7.18	7.11	8.92	-3.94213	3.71783e-27	--	XP_022845632.1 uncharacterized protein LOC111368555 [Olea europaea var. sylvestris] [Olea europaea]
Unigene0008246	31.34	21.41	40.85	6.1	5.11	4.61	2.56476	3.79454e-27	ABCG36	XP_011080481.1 ABC transporter G family member 35-like [Sesamum indicum]
Unigene0007387	14.89	18.42	17.54	6.62	6.66	6.74	1.34481	3.96322e-27	AGD8	PIN25570.1 putative GTPase-activating protein [Handroanthus impetiginosus]
Unigene0001371	11.23	14.38	10.43	0.94	1.26	2.01	3.09771	3.9702e-27	BT3	XP_012839051.1 PREDICTED: BTB/POZ and TAZ domain-containing protein 3 [Erythranthe guttata]
Unigene0017128	4.34	3.65	4.79	25.74	20.83	20.82	-2.39865	3.9811e-27	PAM68	PIN24758.1 hypothetical protein CDL12_02503 [Handroanthus impetiginosus]
Unigene0024016	27.12	44.16	65.46	5.21	5.31	3.72	3.26341	4.1271e-27	--	-
Unigene0028164	43.3	30.1	23.37	226.83	267.22	239.68	-2.92262	4.39516e-27	CYP79D3	XP_022874059.1 isoleucine N-monooxygenase 2-like [Olea europaea var. sylvestris] [Olea europaea]
Unigene0030986	10.02	16.51	8.64	0.51	0.33	0.68	4.5322	4.89299e-27	--	XP_012845895.1 PREDICTED: uncharacterized protein LOC105965893 [Erythranthe guttata]
Unigene0033309	0.67	1.12	0.64	14.42	10.72	18.91	-4.18011	4.89693e-27	At3g55800	XP_011084948.1 sedoheptulose-1,7-bisphosphatase, chloroplastic [Sesamum indicum]
Unigene0022349	0.86	0.23	0.32	23.91	26.07	17.24	-5.57512	4.95695e-27	GRXC13	XP_011082492.1 monothiol glutaredoxin-S9-like [Sesamum indicum]
Unigene0032940	2.31	1.94	2.4	12.41	14.68	13.01	-2.59218	4.98335e-27	ATL13	XP_011069846.1 RING-H2 finger protein ATL13 [Sesamum indicum]
Unigene0003903	6.81	7.45	6.54	0.63	0.41	0.84	3.46778	4.98507e-27	--	XP_012855571.1 PREDICTED: F-box protein At5g07610-like [Erythranthe guttata]
Unigene0026511	20.77	18.63	20.85	9.13	8.32	7.82	1.25354	5.35858e-27	--	EYU20394.1 hypothetical protein MIMGU_mgv1a000210mg [Erythranthe guttata]
Unigene0014486	64.96	59.98	47.13	6.89	5.4	11.45	2.8576	5.38008e-27	--	-
Unigene0010881	8.75	5.87	7.03	0.26	0.07	0	6.03576	5.50647e-27	NCED2	XP_020553830.1 probable 9-cis-epoxycarotenoid dioxygenase NCED5, chloroplastic [Sesamum indicum]
Unigene0002310	6.26	6.8	5.58	0.11	0.42	0.24	4.5974	5.53831e-27	--	XP_011094405.1 uncharacterized protein LOC105174110 [Sesamum indicum]
Unigene0026121	612.29	467.82	649.12	184.7	174.43	142.33	1.78592	5.56244e-27	ABCG15	XP_011080364.1 ABC transporter G family member 12 [Sesamum indicum]
Unigene0000633	0.55	0.73	0.41	6.01	5.44	6.78	-3.43122	5.56244e-27	WAK2	PIN17399.1 Serine/threonine protein kinase [Handroanthus impetiginosus]
Unigene0024417	0.03	0.08	0.03	20.64	18.16	13.51	-8.54552	5.67844e-27	CSLA2	XP_011089999.1 glucomannan 4-beta-mannosyltransferase 2 [Sesamum indicum]
Unigene0031122	0.21	0.55	0.29	7.66	6.15	8.95	-4.43804	5.93926e-27	--	XP_011091529.1 uncharacterized protein LOC105171946 [Sesamum indicum]
Unigene0032626	68.12	134.64	87.84	18.41	17.09	21.41	2.35228	6.4399e-27	--	XP_022881055.1 LIM domain-containing protein A-like [Olea europaea var. sylvestris] [Olea europaea]
Unigene0031268	61.12	66.67	53.74	25.74	28.17	24.89	1.20394	6.82318e-27	COI1	ARB15806.1 COI1 [Salvia miltiorrhiza]
Unigene0016487	9.76	12.08	9.64	37.67	40.78	36.54	-1.869	7.6557e-27	ENDO4	XP_012848524.1 PREDICTED: endonuclease 4-like isoform X2 [Erythranthe guttata]
Unigene0031315	31.08	35.99	34.55	13.18	13.01	16.02	1.26753	7.66152e-27	mfsd5	XP_012858517.1 PREDICTED: molybdate-anion transporter-like [Erythranthe guttata]
Unigene0035173	2.82	2.63	2.37	15.12	14.99	11.89	-2.42515	8.0972e-27	PUB35	XP_011076423.1 U-box domain-containing protein 35 [Sesamum indicum]
Unigene0029271	12.75	10.91	15.81	62.46	60.12	55.66	-2.17499	8.40208e-27	AGAL3	XP_011084838.1 alpha-galactosidase 3-like [Sesamum indicum]
Unigene0024731	46.13	30.02	26.2	4.19	2.2	3.7	3.34251	8.51393e-27	EP3	XP_031124070.1 endochitinase EP3-like [Ipomoea triloba]
Unigene0033158	0.16	0.1	0.61	21.04	17.62	15.56	-5.96167	1.02242e-26	--	XP_018843825.1 PREDICTED: lamin-like protein isoform X1 [Juglans regia]
Unigene0030003	0.23	0.28	0.39	6.11	6.49	7.1	-4.45213	1.03665e-26	PBF	TEY24277.1 hypothetical protein Saspl_043425 [Salvia splendens]
Unigene0003120	0.13	0.51	0.04	75.3	76.08	93.01	-8.48943	1.07318e-26	CAX3	PIN17179.1 Ca2+/H+ antiporter VCX1 [Handroanthus impetiginosus]
Unigene0016181	2.53	2.01	1.79	21.17	20.74	19.67	-3.28218	1.10517e-26	ARG7	PIN07137.1 hypothetical protein CDL12_20306 [Handroanthus impetiginosus]
Unigene0025389	1.55	0.68	2.4	35.5	27.41	25.29	-4.25169	1.14774e-26	GGPPS1	ALT07955.1 putative geranyl diphosphate synthase small subunit type I [Leucosceptrum canum]
Unigene0027046	146.85	153.8	102.98	629.09	579.69	633.39	-2.1903	1.25801e-26	CIPK6	PIN02565.1 Serine/threonine protein kinase [Handroanthus impetiginosus]
Unigene0027816	16.8	15.87	19.56	6.92	6.83	6.22	1.38704	1.33905e-26	SWI3D	XP_011088374.1 SWI/SNF complex subunit SWI3D [Sesamum indicum]
Unigene0024772	57	59.4	44.35	210.79	239.69	197.79	-2.01178	1.59621e-26	DRMH1	TEY22995.1 hypothetical protein Saspl_047988 [Salvia splendens]
Unigene0003279	2.67	3.83	4.24	19.11	17.94	17.94	-2.35618	1.76834e-26	HSP70	XP_023761020.1 heat shock cognate 70 kDa protein 2-like [Lactuca sativa]
Unigene0029407	21.53	23.71	38.72	190.25	181.87	171.09	-2.69374	1.78737e-26	At1g78530	KZV29721.1 hypothetical protein F511_05815, partial [Dorcoceras hygrometricum]
Unigene0028985	23.06	21.68	18.99	8.1	7.07	7.17	1.51234	1.79921e-26	AHL5	TEY11183.1 hypothetical protein Saspl_044744 [Salvia splendens]
Unigene0002998	33.93	54.6	23.04	5.03	3.75	3.74	3.15564	1.82579e-26	UGT86A1	XP_012836028.1 PREDICTED: UDP-glycosyltransferase 86A1-like [Erythranthe guttata]
Unigene0001594	31.63	29.06	32.18	6.7	9.82	9.18	1.85344	2.00243e-26	IPI2	THG02744.1 hypothetical protein TEA_000389 [Camellia sinensis var. sinensis] [Camellia sinensis]
Unigene0002957	26.69	30.64	18.52	176.04	182.03	133.59	-2.69644	2.22364e-26	At2g39020	XP_022879246.1 probable acetyltransferase NATA1-like [Olea europaea var. sylvestris] [Olea europaea]
Unigene0018178	9.54	7.45	11.24	0.79	0.91	1.12	3.32346	2.46288e-26	FH5	XP_020553859.1 formin-like protein 5 isoform X2 [Sesamum indicum]
Unigene0034337	0.38	0.97	0.7	8	8.73	8.22	-3.60534	2.57223e-26	--	PIN06960.1 hypothetical protein CDL12_20484 [Handroanthus impetiginosus]
Unigene0006411	2.91	2.76	1.93	14.37	12.96	14.59	-2.46357	2.6783e-26	CLC-B	XP_011098867.1 chloride channel protein CLC-a [Sesamum indicum]
Unigene0032213	0.63	0.65	0.61	7.84	9.44	11.02	-3.90434	2.78218e-26	MYR2	XP_011077862.1 myb-related protein 2 isoform X1 [Sesamum indicum]
Unigene0010267	0.7	0.57	2.47	37.11	34.21	37.61	-4.86422	2.81117e-26	--	KAA8518515.1 hypothetical protein F0562_015989 [Nyssa sinensis]
Unigene0006615	1.36	1.23	1.67	9.67	8.72	11.74	-2.82228	3.00001e-26	GT4	XP_011084238.1 putative UDP-rhamnose:rhamnosyltransferase 1 [Sesamum indicum]
Unigene0032752	16.17	17.65	19.35	6.61	7.3	7.69	1.29958	3.00204e-26	fmdA	EOX91646.1 Acetamidase/Formamidase family protein isoform 1 [Theobroma cacao]
Unigene0027434	20.71	23.03	24.71	6.41	7.05	4.78	1.90794	3.03915e-26	NRP1	XP_011071637.1 NAP1-related protein 2-like [Sesamum indicum]
Unigene0034821	73.86	90.91	99.78	32.67	37.67	35.07	1.32753	3.23709e-26	PPC	PIN16568.1 Phosphoenolpyruvate carboxylase [Handroanthus impetiginosus]
Unigene0024813	46.3	41.56	53.68	18.96	16.54	18.4	1.39285	3.49481e-26	CDA1	PIN08384.1 Cytidine deaminase [Handroanthus impetiginosus]
Unigene0008573	14.3	15.76	13.41	4.08	4.77	5.32	1.61718	3.74182e-26	--	-
Unigene0005880	1179.81	1100.84	1036.19	502.16	509.39	579.99	1.05939	4.04429e-26	RD21B	XP_011069730.1 low-temperature-induced cysteine proteinase-like [Sesamum indicum]
Unigene0022050	38.29	41.17	37.56	105.64	94.59	101.51	-1.36655	4.09772e-26	HSP70	XP_011092298.1 stromal 70 kDa heat shock-related protein, chloroplastic [Sesamum indicum]
Unigene0025634	1.16	1.37	1.89	8.31	8.1	7.94	-2.4618	4.73262e-26	At3g26840	XP_011098939.1 acyltransferase-like protein At3g26840, chloroplastic isoform X1 [Sesamum indicum]
Unigene0001572	15.68	19.18	16.41	5.58	5.89	4.52	1.68094	4.75527e-26	UGT94E5	BBK26430.1 UDP-glycosyltransferase [Sesamum indicum]
Unigene0024384	8.55	14.71	15.74	1.17	1.29	1.6	3.26392	4.81133e-26	ARR5	XP_011071752.1 two-component response regulator ARR5 [Sesamum indicum]
Unigene0020507	3.33	5.14	4.51	1.19	1.02	1.17	1.9412	4.90717e-26	fadD28	XP_020549988.1 uncharacterized protein LOC105163603 [Sesamum indicum]
Unigene0028517	44.6	39.82	37.16	7.58	12.23	10.39	2.00929	4.91683e-26	--	XP_012834665.1 PREDICTED: uncharacterized protein LOC105955483 [Erythranthe guttata]
Unigene0025385	15.74	17.74	14.71	49.27	52.96	58.02	-1.73352	5.17245e-26	--	XP_011069378.1 uncharacterized protein LOC105155205 [Sesamum indicum]
Unigene0015336	65.31	55.97	100.62	15.07	10.33	11.64	2.58275	5.42922e-26	PGIP1	PIN12702.1 hypothetical protein CDL12_14687 [Handroanthus impetiginosus]
Unigene0013079	2.84	5.67	3.16	29.23	29.15	33.94	-2.98384	5.43896e-26	--	CDP12860.1 unnamed protein product [Coffea canephora]
Unigene0029074	27.64	24.71	29.62	9.54	10.52	7.89	1.55225	6.17778e-26	LHW	PIN10642.1 hypothetical protein CDL12_16763 [Handroanthus impetiginosus]
Unigene0031106	0.46	0.15	0.17	16.35	19.18	8.19	-5.80868	6.68513e-26	At4g16563	PIN07581.1 Aspartyl protease [Handroanthus impetiginosus]
Unigene0033937	14.03	14.38	12.1	46.69	48.42	59.37	-1.93107	7.29187e-26	MYB308	XP_031478278.1 myb-related protein 308-like [Nymphaea colorata]
Unigene0016003	9.45	16.25	8.79	0.99	1.19	1.06	3.41211	7.43234e-26	--	-
Unigene0024179	0.66	0.8	0.77	6.33	5.3	6.5	-3.02326	7.48308e-26	BB	XP_011080278.1 E3 ubiquitin ligase BIG BROTHER [Sesamum indicum]
Unigene0034270	22.27	26	26.61	6.07	7.73	7.64	1.80428	7.50277e-26	BCA2	GER32240.1 carbonic anhydrase [Striga asiatica]
Unigene0010443	83.6	74.98	84.55	34.78	33.1	27.32	1.35269	7.68222e-26	PUP5	PIN00953.1 hypothetical protein CDL12_26546 [Handroanthus impetiginosus]
Unigene0024747	3.06	2.86	3.99	15.45	15.97	16.02	-2.25915	7.80912e-26	BHLH094	XP_011071748.1 transcription factor bHLH79-like isoform X1 [Sesamum indicum]
Unigene0010644	0.37	0.15	0.26	11.18	10.66	10.13	-5.3571	8.04248e-26	--	PIN21616.1 hypothetical protein CDL12_05695 [Handroanthus impetiginosus]
Unigene0028371	5.28	6.05	12.54	105.24	105.41	80.28	-3.6074	8.04687e-26	WLIM1	XP_011074349.1 LIM domain-containing protein WLIM1 [Sesamum indicum]
Unigene0028096	31.85	35.21	27.79	14.32	12.88	14.35	1.1908	8.46798e-26	MAF1	XP_011075765.1 uncharacterized protein LOC105160192 isoform X1 [Sesamum indicum]
Unigene0030185	1.42	2.28	2.63	13.27	13.67	13.95	-2.69147	8.82064e-26	NIK1	PIN02443.1 Serine/threonine protein kinase [Handroanthus impetiginosus]
Unigene0025174	0	0.22	0.36	16.08	13.93	11.3	-6.15429	9.29918e-26	PDLP6	XP_011070584.1 cysteine-rich repeat secretory protein 12 [Sesamum indicum]
Unigene0019397	111.24	103.26	91.82	24.58	24.56	35.91	1.84866	9.33611e-26	CXE18	XP_011083238.1 probable carboxylesterase 18 [Sesamum indicum]
Unigene0003526	0.29	0	0.42	12.87	14.52	17.74	-5.99012	9.68403e-26	MYB73	PIN11232.1 hypothetical protein CDL12_16169 [Handroanthus impetiginosus]
Unigene0035137	95.06	115.57	87.87	24.28	21.11	34.03	1.91016	1.05392e-25	EXPB3	XP_011085969.1 expansin-B3-like [Sesamum indicum]
Unigene0034601	2780.12	1849.28	2035.91	580.07	647.27	651.29	1.82699	1.05791e-25	CRSP	XP_011083454.2 CO(2)-response secreted protease [Sesamum indicum]
Unigene0032944	11.89	9.03	9.4	52.82	42.4	47.33	-2.23313	1.13065e-25	WDL4	XP_015577807.1 protein WVD2-like 4 isoform X1 [Ricinus communis]
Unigene0018631	0	0.21	0.08	6.55	4.66	5.4	-5.83986	1.14543e-25	At4g27290	XP_011097953.1 G-type lectin S-receptor-like serine/threonine-protein kinase At4g27290 [Sesamum indicum]
Unigene0002914	8.51	10.11	12.2	54.39	45.71	64.64	-2.41825	1.30164e-25	SGPP	XP_011085279.1 haloacid dehalogenase-like hydrolase domain-containing protein Sgpp [Sesamum indicum]
Unigene0010512	14.45	14.06	8.62	0.05	0.21	0.24	6.21451	1.31951e-25	--	XP_011094663.1 uncharacterized protein LOC105174308 [Sesamum indicum]
Unigene0026336	21.24	18.22	23.64	4.67	3	4.21	2.40911	1.36309e-25	--	TEY19228.1 hypothetical protein Saspl_048600 [Salvia splendens]
Unigene0018166	15.31	26.24	9	0.56	0.79	0.62	4.68144	1.38742e-25	ABR1	PIN11453.1 hypothetical protein CDL12_15943 [Handroanthus impetiginosus]
Unigene0000575	0.2	0.21	0.31	7.05	7.06	5.05	-4.73396	1.41201e-25	--	XP_011084989.1 uncharacterized protein LOC105167112 [Sesamum indicum]
Unigene0000263	54.51	65.62	48.75	23.57	25.51	23.43	1.21975	1.48813e-25	AUR3	XP_011091018.1 serine/threonine-protein kinase Aurora-3 isoform X1 [Sesamum indicum]
Unigene0025894	7.21	7.94	7.46	2.76	2.97	2.69	1.42507	1.49991e-25	BRXL1	XP_011092615.1 protein Brevis radix-like 1 [Sesamum indicum]
Unigene0036242	22.44	25.87	19.39	6.13	5.41	7.38	1.83924	1.55828e-25	PDCB2	TEY86890.1 hypothetical protein Saspl_010918 [Salvia splendens]
Unigene0007434	12.5	12.85	7.69	1.28	1.85	1.26	2.91192	1.58204e-25	BHLH130	PIM98254.1 hypothetical protein CDL12_29268 [Handroanthus impetiginosus]
Unigene0031960	6.66	7.34	6.99	1.51	1.59	1.29	2.25741	1.58272e-25	TBL35	XP_011095070.1 protein trichome birefringence-like 35 [Sesamum indicum]
Unigene0004324	115.61	184.48	151.45	27.35	23.06	40.37	2.31441	1.59823e-25	DI19-1	XP_011087471.1 protein DEHYDRATION-INDUCED 19 homolog 3-like isoform X2 [Sesamum indicum]
Unigene0016593	57.67	55.45	75.97	23.58	23.33	20.74	1.48291	1.69349e-25	LHT1	XP_011098833.1 lysine histidine transporter 1 [Sesamum indicum]
Unigene0001497	0.15	0.14	0.19	6.79	5.68	6.82	-5.32867	1.75702e-25	PTAC16	PIN05289.1 putative dehydrogenase [Handroanthus impetiginosus]
Unigene0011738	5.36	6.99	6.3	1.44	1.62	1.56	2.01321	1.81598e-25	At2g02240	XP_022847439.1 F-box protein PP2-B10-like [Olea europaea var. sylvestris] [Olea europaea]
Unigene0025205	5.84	5.93	4.29	48.89	36.1	78.11	-3.34421	2.02312e-25	At1g54570	XP_011081015.1 acyltransferase-like protein At1g54570, chloroplastic [Sesamum indicum]
Unigene0024868	38.24	42.35	12.85	0.05	0.12	0.05	8.73039	2.11413e-25	TSJT1	XP_011069390.1 stem-specific protein TSJT1-like [Sesamum indicum]
Unigene0024690	13.04	13.19	9.19	1.86	1.58	2.52	2.57118	2.13971e-25	CBSDUF3	XP_011088024.1 DUF21 domain-containing protein At2g14520 [Sesamum indicum]
Unigene0005864	1.32	0.64	1.25	21.18	19.4	35.84	-4.57331	2.13971e-25	DSP-22	XP_011090667.1 early light-induced protein 1, chloroplastic isoform X1 [Sesamum indicum]
Unigene0027845	29.79	19.27	43.41	3.98	2.69	2.5	3.33399	2.1413e-25	At2g28490	XP_011089873.1 vicilin-like seed storage protein At2g28490 [Sesamum indicum]
Unigene0005835	0.29	0.24	0.22	5.34	3.88	4.26	-4.16779	2.45098e-25	PHOT2	AML79642.1 putative LOV domain-containing protein [Uncarina grandidieri]
Unigene0034294	37.61	36.24	38.49	0.95	1.41	3.91	4.16326	2.75863e-25	At5g41620	XP_011088935.1 uncharacterized protein At5g41620 [Sesamum indicum]
Unigene0011179	9.52	5.67	13.57	112.58	105.7	85.67	-3.4017	2.81421e-25	LHCB4.1	XP_021888643.1 chlorophyll a-b binding protein CP29.1, chloroplastic [Carica papaya]
Unigene0030533	0.6	0.32	0.8	8.83	7.09	7.65	-3.77647	3.40984e-25	GP1	XP_012844795.1 PREDICTED: polygalacturonase-1 non-catalytic subunit beta-like [Erythranthe guttata]
Unigene0034026	0.62	0.67	1.09	15.9	11.93	12.49	-4.08246	3.42171e-25	--	XP_022846582.1 uncharacterized protein LOC111369337 [Olea europaea var. sylvestris] [Olea europaea]
Unigene0014262	239.59	232.69	184.82	83.15	74.39	62.61	1.57763	4.00328e-25	TPS11	PIN14737.1 Trehalose-6-phosphate synthase component TPS1 [Handroanthus impetiginosus]
Unigene0023029	0.35	1.12	0.59	12.31	11.98	13.23	-4.18694	5.00413e-25	JA2	XP_011095243.1 NAC domain-containing protein 72 [Sesamum indicum]
Unigene0026884	0.32	0.48	0.52	4.53	4.05	6	-3.46538	5.16514e-25	--	XP_011080988.1 paramyosin [Sesamum indicum]
Unigene0018577	28.05	33.45	24.4	10	11.13	11.52	1.39558	6.12718e-25	DDS	XP_011096562.1 dammarenediol II synthase-like [Sesamum indicum]
Unigene0023648	1.03	1.31	4.18	234.57	198.9	216.99	-6.64044	6.2947e-25	--	-
Unigene0035413	9.76	9.05	12.12	2.04	2.1	2.14	2.30017	6.4174e-25	GDH2	XP_012829735.1 PREDICTED: glycine cleavage system H protein 2, mitochondrial [Erythranthe guttata]
Unigene0034574	5.22	5.81	2.34	0.23	0.39	0.32	3.83019	6.48746e-25	GIP	BAD34493.1 Gag-Pol [Ipomoea batatas]
Unigene0035651	3.57	3.78	1.94	22.56	25.09	28.86	-3.0419	7.14386e-25	5MAT1	XP_012850815.1 PREDICTED: malonyl-coenzyme:anthocyanin 5-O-glucoside-6'''-O-malonyltransferase-like [Erythranthe guttata]
Unigene0004372	8.04	8.95	9.28	33.16	27.23	31.68	-1.80931	7.1889e-25	CCR1	KAB1218794.1 Cinnamoyl-CoA reductase 1 [Morella rubra]
Unigene0031763	0.36	0.71	0.07	15.2	12.09	12.86	-5.13829	7.29088e-25	RPT3	XP_011087936.1 root phototropism protein 3 [Sesamum indicum]
Unigene0013419	0.22	0.37	0.63	7.7	5.96	9.41	-4.24106	7.353e-25	sbt3	XP_011074393.1 subtilisin-like protease SBT1.9 [Sesamum indicum]
Unigene0033302	696.93	572.28	651.07	0.95	5.5	1.14	7.983	7.94634e-25	DIR11	XP_011088570.1 dirigent protein 21 [Sesamum indicum]
Unigene0000781	27.39	28.12	24.12	13.23	11.72	12.65	1.08258	8.70498e-25	ABCG32	XP_011078340.1 ABC transporter G family member 32 [Sesamum indicum]
Unigene0024319	10.88	9.9	9.9	37.41	38.29	45.74	-1.98487	8.73221e-25	--	PIN08013.1 hypothetical protein CDL12_19411 [Handroanthus impetiginosus]
Unigene0021914	0.09	0.04	0.05	14.4	7.31	9.21	-7.4244	8.76704e-25	At2g45750	PIN11930.1 hypothetical protein CDL12_15473 [Handroanthus impetiginosus]
Unigene0031593	16.44	12.49	11.45	0.27	0.44	0	5.82968	8.95494e-25	DIR21	XP_012847347.1 PREDICTED: dirigent protein 1-like [Erythranthe guttata]
Unigene0030352	489.32	458.03	500.02	163.75	148.27	214.12	1.45992	9.46168e-25	CER1	XP_011085147.1 protein ECERIFERUM 1-like [Sesamum indicum]
Unigene0028021	47.71	55.84	26.62	7.44	7.89	7.52	2.51013	9.52648e-25	APSR1	XP_020554196.1 uncharacterized protein LOC105175929 [Sesamum indicum]
Unigene0031899	11.12	8.7	11.34	2.85	2.52	2.4	2.00371	1.19954e-24	GFPT2	PIN23642.1 Glucosamine 6-phosphate synthetase [Handroanthus impetiginosus]
Unigene0021341	10.12	16.48	7.97	0.69	0.9	0.71	3.90981	1.29302e-24	--	-
Unigene0015259	236.91	265.28	169.43	68.65	73.05	74.11	1.63788	1.40792e-24	PAP24	PIN03055.1 Purple acid phosphatase [Handroanthus impetiginosus]
Unigene0000815	0	0.08	0.11	36.73	41.68	44.22	-9.3341	1.40792e-24	ENODL1	XP_011082692.1 early nodulin-like protein 2 [Sesamum indicum]
Unigene0029992	0.34	0.53	0.95	8.35	8.23	7.44	-3.72223	1.49455e-24	R1A-10	XP_011072146.1 putative late blight resistance protein homolog R1B-16 isoform X1 [Sesamum indicum]
Unigene0035273	3.33	5.47	5.02	0.23	0.26	0.29	4.14714	1.61824e-24	AAE14	KZV46273.1 2-succinylbenzoate--CoA ligase, chloroplastic/peroxisomal-like [Dorcoceras hygrometricum]
Unigene0000445	400.63	313.43	312.06	132.22	129.67	117.75	1.4345	1.63378e-24	ABCG11	XP_011072099.1 ABC transporter G family member 11 [Sesamum indicum]
Unigene0026281	26.34	55.33	38.09	312.2	304.84	522.01	-3.24961	1.71056e-24	WAT1	PIN21687.1 hypothetical protein CDL12_05603 [Handroanthus impetiginosus]
Unigene0003238	14.38	15.93	14.92	0.96	0.28	0.72	4.52835	1.93509e-24	--	XP_012853445.1 PREDICTED: subtilisin-like protease SBT3.3 [Erythranthe guttata]
Unigene0000713	0.1	0.29	0.15	3.95	3.57	3.09	-4.29632	1.9878e-24	REV	XP_011089294.1 homeobox-leucine zipper protein REVOLUTA [Sesamum indicum]
Unigene0011698	0.75	0.69	1.05	6.46	6.86	9.49	-3.19545	2.12564e-24	TPS1	KZV29718.1 trehalose-phosphate synthase 1 [Dorcoceras hygrometricum]
Unigene0002218	10.52	8.38	12.7	53.19	45.62	53.25	-2.26664	2.15436e-24	BHLH147	TEY49164.1 hypothetical protein Saspl_021081 [Salvia splendens]
Unigene0018226	0.52	0.58	0.92	11.63	10.49	7.33	-3.86584	2.20622e-24	At5g22090	XP_022869342.1 protein FAF-like, chloroplastic [Olea europaea var. sylvestris] [Olea europaea]
Unigene0017600	29.25	31.84	40.65	12.07	12.37	10.68	1.53452	2.28504e-24	CIPK23	XP_022847949.1 CBL-interacting serine/threonine-protein kinase 23-like isoform X1 [Olea europaea var. sylvestris] [Olea europaea]
Unigene0021789	18.04	11.07	6.68	166.11	175.47	133.05	-3.72917	2.53527e-24	--	TEY26190.1 hypothetical protein Saspl_032190 [Salvia splendens]
Unigene0010875	16.66	21.74	16.84	5.75	4.39	5.87	1.78674	2.75926e-24	GATA5	XP_011100952.1 GATA transcription factor 5-like [Sesamum indicum]
Unigene0016467	2.3	2.38	2.17	12.66	10.71	13.55	-2.43023	2.8201e-24	UAH	PIN06021.1 ureidoglycolate amidohydrolase [Handroanthus impetiginosus]
Unigene0035618	135.83	141.05	95.44	30.33	40.69	35.76	1.8019	2.94623e-24	--	CBI28161.3 unnamed protein product, partial [Vitis vinifera]
Unigene0027850	13.89	10.29	17.95	84.02	75.75	77.01	-2.49063	3.05703e-24	MPE3	GER45067.1 plant invertase/pectin methylesterase inhibitor [Striga asiatica]
Unigene0024942	0.43	0.43	0.24	13.39	10.48	10.97	-4.98517	3.20294e-24	FAF3	XP_011090759.1 protein FANTASTIC FOUR 3 [Sesamum indicum]
Unigene0023118	7.9	5.86	7.45	31.08	37.49	30.88	-2.22923	3.23522e-24	At1g65240	PIN01837.1 Aspartyl protease [Handroanthus impetiginosus]
Unigene0002495	83.78	92.8	64.36	294.82	311.7	350.77	-1.99028	3.30581e-24	DAD2	XP_011074357.1 probable strigolactone esterase DAD2 [Sesamum indicum]
Unigene0030778	24.03	22.24	26.54	85.5	76.26	72.11	-1.6835	3.30581e-24	Ipo5	XP_011089727.1 importin-5 [Sesamum indicum]
Unigene0015491	2.96	3.62	2.69	0.32	0.27	0.46	3.14218	3.41288e-24	KIN12D	XP_011088306.1 kinesin-like protein KIN-12D [Sesamum indicum]
Unigene0017899	1887.11	3252.52	2576.35	774.19	781.86	880.61	1.66294	3.58932e-24	HSC-2	XP_011094842.1 heat shock cognate 70 kDa protein 2 [Sesamum indicum]
Unigene0023773	5.4	5.53	14.78	187.64	122.9	135.01	-4.11519	3.8214e-24	TUBB1	XP_012839178.1 PREDICTED: tubulin beta chain-like [Erythranthe guttata]
Unigene0034024	0.43	0.59	0.81	11.58	10.82	9.05	-4.10314	3.86135e-24	CP29B	XP_011094656.1 29 kDa ribonucleoprotein A, chloroplastic [Sesamum indicum]
Unigene0031828	37.6	35.24	45.45	15.27	15.43	16.4	1.32853	4.00067e-24	--	XP_011080353.1 uncharacterized protein LOC105163626 [Sesamum indicum]
Unigene0026624	4.82	5.77	5.6	18.12	21.08	24.81	-1.98319	4.01525e-24	At2g41170	XP_011080446.1 F-box protein At2g32560 [Sesamum indicum]
Unigene0027863	12.97	12.48	22.06	2.06	1.99	1.92	2.99243	4.34124e-24	SYT3	KZV26062.1 synaptotagmin-3 [Dorcoceras hygrometricum]
Unigene0029774	0	0.07	0.19	5.69	5.39	5.08	-5.95777	4.40524e-24	BXL7	PIN24743.1 Non-reducing end alpha-L-arabinofuranosidase [Handroanthus impetiginosus]
Unigene0024922	2.62	2.79	5.18	36.3	41.01	28.23	-3.31702	4.59797e-24	ERF061	PIN21009.1 hypothetical protein CDL12_06299 [Handroanthus impetiginosus]
Unigene0030561	3.22	3.5	3.5	29.94	22.85	45.79	-3.2699	4.86531e-24	TATB	XP_011076133.1 sec-independent protein translocase protein TATB, chloroplastic [Sesamum indicum]
Unigene0030186	0.48	0.25	0.55	5.71	6.64	6.03	-3.84392	5.09901e-24	NIK2	XP_011070875.1 protein NSP-INTERACTING KINASE 2-like [Sesamum indicum]
Unigene0000329	1.79	2.45	2.35	11.55	10.16	10.29	-2.27972	5.09901e-24	MRL7L	XP_011085068.1 uncharacterized protein LOC105167168 [Sesamum indicum]
Unigene0010824	0.29	0.12	0.76	12.91	12.25	9.95	-4.9073	5.55755e-24	--	-
Unigene0003395	2.38	2.45	2.53	15.46	13.54	11.93	-2.47538	5.63117e-24	ATG18D	XP_011084784.1 autophagy-related protein 18c [Sesamum indicum]
Unigene0034025	5.14	5.18	4.63	28.64	25.91	21.73	-2.35116	5.68912e-24	CP29B	XP_011094656.1 29 kDa ribonucleoprotein A, chloroplastic [Sesamum indicum]
Unigene0006397	0.16	0.11	0.32	3.92	3.75	4.51	-4.36766	5.86655e-24	NPF5.1	XP_011076614.1 protein NRT1/ PTR FAMILY 5.1 [Sesamum indicum]
Unigene0000494	1.14	1.25	1.81	12.14	11.31	14.27	-3.16687	6.40148e-24	--	GER57033.1 C2H2-like zinc finger protein [Striga asiatica]
Unigene0034674	15.96	11.07	15.42	0.44	0.23	0.39	5.32363	6.48181e-24	--	XP_023770162.1 uncharacterized protein LOC111918772 [Lactuca sativa]
Unigene0006286	17.02	18.22	16.78	0.21	0.4	0.23	5.95253	6.60667e-24	--	-
Unigene0023740	7.59	9.03	6.05	1.77	1.21	1.54	2.32639	7.21679e-24	PUB33	PIN22832.1 Serine/threonine protein kinase [Handroanthus impetiginosus]
Unigene0029659	40.28	71.8	17.42	0	0.18	0.16	8.5732	7.34147e-24	--	-
Unigene0016141	19.42	31.38	21.97	3.53	4.25	4.33	2.58714	7.6249e-24	--	XP_011080774.1 dynein light chain 1, cytoplasmic-like [Sesamum indicum]
Unigene0036507	2304.38	1698.15	2232.76	649.04	466.48	410.62	2.03057	7.64782e-24	LTP1	PIM98593.1 hypothetical protein CDL12_28926 [Handroanthus impetiginosus]
Unigene0018339	22.21	25.03	25.07	9.86	11.54	11.13	1.15242	8.55349e-24	--	XP_020551042.1 uncharacterized protein LOC105160920 [Sesamum indicum]
Unigene0007182	436.49	386.75	293.28	101.24	80.69	117.04	1.90094	8.56552e-24	EXPA11	XP_011083443.1 expansin-A11 [Sesamum indicum]
Unigene0033323	0.2	0.03	0.4	8.9	8.28	5.82	-5.19014	8.79461e-24	Os07g0682400	XP_011080369.1 zinc finger CCCH domain-containing protein 46 [Sesamum indicum]
Unigene0017490	34.69	33.25	35.31	97.13	91.57	89.09	-1.42785	9.69729e-24	--	KZV47158.1 Alpha/beta-Hydrolases superfamily protein isoform 1 [Dorcoceras hygrometricum]
Unigene0005815	13.42	16.36	9.88	2.33	1.75	1.45	2.84233	9.81949e-24	NAC056	PIN09583.1 hypothetical protein CDL12_17832 [Handroanthus impetiginosus]
Unigene0033411	18.56	26.21	19.68	7.39	7.59	8.48	1.45798	9.88022e-24	CNGC2	PIM99958.1 K+-channel ERG [Handroanthus impetiginosus]
Unigene0017976	30.11	42.68	17.02	1.16	1.02	2.92	4.13831	1.02058e-23	ORTH2	XP_011086888.1 E3 ubiquitin-protein ligase ORTHRUS 2 [Sesamum indicum]
Unigene0010174	1.6	1.6	1.22	9.32	8.75	10.75	-2.70495	1.07087e-23	At4g18260	PIN11580.1 hypothetical protein CDL12_15822 [Handroanthus impetiginosus]
Unigene0029178	0.03	0	0.11	9.2	8.13	10.34	-7.62675	1.08876e-23	IRX12	QCZ35179.1 laccase 12 [Salvia miltiorrhiza]
Unigene0024036	30.86	24.93	23.37	0.02	0	0.03	10.6286	1.10783e-23	At1g03010	XP_020549940.1 BTB/POZ domain-containing protein At1g03010 isoform X3 [Sesamum indicum]
Unigene0019922	32.47	45.52	36.58	15.03	13.26	12.59	1.48676	1.12768e-23	--	PIN22538.1 hypothetical protein CDL12_04731 [Handroanthus impetiginosus]
Unigene0006494	7.53	9.89	4.75	0	0.21	0.03	6.52943	1.21491e-23	--	-
Unigene0010197	156.34	117.74	193.31	45.42	43.02	37.01	1.89751	1.22396e-23	KCR1	EYU44832.1 hypothetical protein MIMGU_mgv1a010167mg [Erythranthe guttata]
Unigene0007380	20.2	23.18	19.57	9.23	8.48	9.04	1.23467	1.42104e-23	At1g12200	XP_011090332.1 flavin-containing monooxygenase FMO GS-OX-like 2 [Sesamum indicum]
Unigene0027791	14.01	15.1	16.85	6.71	5.89	5.72	1.32696	1.48265e-23	Os03g0120900	XP_020550733.1 B3 domain-containing transcription factor NGA1 isoform X2 [Sesamum indicum]
Unigene0028891	36.93	44.37	27.75	10.09	10.65	11.49	1.75851	1.60713e-23	--	XP_011082428.1 uncharacterized protein LOC105165200 [Sesamum indicum]
Unigene0031629	10.71	11.32	10.71	1.42	1.45	2.38	2.64066	1.6397e-23	--	XP_028086973.1 HMG-Y-related protein B-like [Camellia sinensis]
Unigene0016209	256.37	191.92	139.67	46.21	44.15	44.89	2.12009	1.75507e-23	PAP20	XP_011094367.1 probable purple acid phosphatase 20 [Sesamum indicum]
Unigene0036365	46.08	46.98	42.45	21.76	23.32	19.57	1.06768	1.75677e-23	RGLG2	XP_011097362.1 E3 ubiquitin-protein ligase RGLG2-like [Sesamum indicum]
Unigene0021460	15.36	11.84	9.46	113.18	81.41	78.95	-2.89947	2.06406e-23	PSAK	TEY69790.1 photosystem I subunit X [Salvia splendens]
Unigene0031128	5.51	5.03	6.08	23.19	23.5	27.4	-2.15636	2.09583e-23	GATA17	GER46878.1 GATA transcription factor [Striga asiatica]
Unigene0015690	8.55	9.03	11.64	2.64	1.78	2.06	2.17289	2.14001e-23	--	XP_011072154.1 uncharacterized protein LOC105157443 [Sesamum indicum]
Unigene0025027	363.2	306.51	323.85	149.89	164.14	147.82	1.10518	2.19764e-23	CYP76T24	XP_012845086.1 PREDICTED: geraniol 8-hydroxylase-like [Erythranthe guttata]
Unigene0027798	1.81	1.37	1.19	9.48	10	8.81	-2.69459	2.20784e-23	STN8	XP_011095153.1 serine/threonine-protein kinase STN8, chloroplastic [Sesamum indicum]
Unigene0017265	89.58	84.86	64.91	30.36	28.83	26.46	1.4826	2.21018e-23	MAX2A	XP_012832933.1 PREDICTED: F-box/LRR-repeat MAX2 homolog A [Erythranthe guttata]
Unigene0005072	6.62	9.57	4.96	0.98	0.86	0.88	2.95898	2.22771e-23	WAV3	XP_011074291.1 uncharacterized protein LOC105159055 [Sesamum indicum]
Unigene0025589	59.39	58.37	42	18.17	17.12	18.38	1.57372	2.25151e-23	PID	PIN03081.1 putative serine/threonine protein kinase [Handroanthus impetiginosus]
Unigene0026560	0.28	0.39	0.53	3.89	3.6	3.3	-3.16859	2.47331e-23	tm-2	XP_011087137.1 putative late blight resistance protein homolog R1A-4 [Sesamum indicum]
Unigene0029847	5.5	7.39	5.28	21.98	21.36	21.48	-1.83488	2.5475e-23	XRN3	XP_011083514.1 5'-3' exoribonuclease 3 isoform X2 [Sesamum indicum]
Unigene0018158	1.84	1.91	0.66	22.2	27.46	29.91	-4.17337	2.59744e-23	ARG7	XP_020551501.1 auxin-induced protein 15A-like [Sesamum indicum]
Unigene0032610	45.56	27.86	41.39	256.41	239.25	192.7	-2.58391	2.97351e-23	mettl16	PIN19180.1 23S rRNA (adenine(1618)-N(6))-methyltransferase [Handroanthus impetiginosus]
Unigene0034863	0.52	0.18	0.4	7.04	7.02	5.69	-4.16628	2.98003e-23	ALKBH10B	XP_011079798.1 uncharacterized protein LOC105163227 [Sesamum indicum]
Unigene0001171	63.31	57.29	79.69	26.64	26.35	25.8	1.34601	2.9855e-23	CSLD2	XP_011070339.1 cellulose synthase-like protein D3 [Sesamum indicum]
Unigene0017316	3.95	3.97	3.97	16.59	16.47	15.07	-2.01719	3.03749e-23	At1g66430	XP_011099474.1 probable fructokinase-6, chloroplastic [Sesamum indicum]
Unigene0014494	16.29	9.28	11.04	0.51	0	0.17	5.75056	3.07497e-23	CTL2	XP_011073914.1 chitinase-like protein 1 [Sesamum indicum]
Unigene0006459	1.59	2.42	0.78	22.02	19.91	31.95	-3.94709	3.51146e-23	IAA10	PIN23971.1 hypothetical protein CDL12_03274 [Handroanthus impetiginosus]
Unigene0032247	15.09	10.23	9.91	66.03	62.06	59.26	-2.41086	3.64517e-23	4CLL7	XP_011087155.1 4-coumarate--CoA ligase-like 7 isoform X1 [Sesamum indicum]
Unigene0029919	7.25	7.63	10.68	1.77	1.39	1.73	2.38598	3.73454e-23	--	XP_011082523.1 probably inactive leucine-rich repeat receptor-like protein kinase At2g25790 [Sesamum indicum]
Unigene0024305	30.4	33.16	32.63	15.73	14.61	17.67	1.00255	3.80371e-23	SNAP33	XP_011072852.1 SNAP25 homologous protein SNAP33 [Sesamum indicum]
Unigene0033218	24.04	21.54	15.82	96.43	86.71	91.88	-2.16323	3.80522e-23	--	PIN18835.1 hypothetical protein CDL12_08502 [Handroanthus impetiginosus]
Unigene0034656	4.98	7.93	5.71	85.73	48.5	50.02	-3.30674	4.04613e-23	PSAE	XP_012829010.1 PREDICTED: photosystem I reaction center subunit IV, chloroplastic [Erythranthe guttata]
Unigene0020387	33.81	38	40.38	12.26	8.69	12.92	1.72786	4.57884e-23	RALFL32	PHT39320.1 hypothetical protein CQW23_22893 [Capsicum baccatum]
Unigene0030222	104.63	82.11	125.3	33.73	34.18	35.7	1.59057	4.61138e-23	SQE1	XP_012835368.1 PREDICTED: squalene monooxygenase-like [Erythranthe guttata]
Unigene0030565	55.13	61.68	66.05	28.3	24.57	31.27	1.11988	4.86255e-23	PLC2	XP_011076692.1 phosphoinositide phospholipase C 2-like [Sesamum indicum]
Unigene0029130	0	0.07	0.05	11.18	8.08	14.42	-8.13271	5.12143e-23	SR1IP1	PIN17425.1 hypothetical protein CDL12_09911 [Handroanthus impetiginosus]
Unigene0006531	0.06	0.15	0.05	17.55	19.03	22.24	-7.82165	5.46045e-23	SWEET7	XP_012842100.1 PREDICTED: bidirectional sugar transporter SWEET7-like [Erythranthe guttata]
Unigene0009712	178.5	193.51	204.77	420.3	417.75	434.53	-1.14166	5.91339e-23	REFA1	OMO73484.1 hypothetical protein COLO4_27068 [Corchorus olitorius]
Unigene0006679	64.44	76.98	57.98	31.46	29.64	32.08	1.09757	6.28707e-23	PHYB	XP_011071377.1 phytochrome B [Sesamum indicum]
Unigene0002236	7.32	7.64	7.69	20.1	20.57	21.13	-1.4481	6.67123e-23	TFT4	XP_016558802.1 PREDICTED: 14-3-3 protein 4 [Capsicum annuum]
Unigene0017383	45.69	44.13	39.47	18.41	19.86	15.59	1.26332	6.70689e-23	At2g30600/At2g30610	PIM99645.1 putative hormone receptor interactor [Handroanthus impetiginosus]
Unigene0003897	2.73	3.76	2.47	20.69	20	28.36	-2.94607	8.92487e-23	CML25	PIN23784.1 Calmodulin and related proteins (EF-Hand superfamily) [Handroanthus impetiginosus]
Unigene0027040	4.69	4.12	5.2	16.59	17.61	20.03	-1.95263	8.92983e-23	--	XP_020549350.1 uncharacterized protein LOC105162824 isoform X4 [Sesamum indicum]
Unigene0030574	3.83	5.48	4.44	0.52	0.8	0.43	2.974	9.15657e-23	EIL1	XP_022885070.1 protein ETHYLENE INSENSITIVE 3-like [Olea europaea var. sylvestris] [Olea europaea]
Unigene0000117	3.56	4.94	6.15	0.83	0.64	0.75	2.72227	1.00148e-22	WRKY22	PIN07897.1 hypothetical protein CDL12_19530 [Handroanthus impetiginosus]
Unigene0024890	6.42	8.93	10.26	36.71	33.62	34.57	-2.03424	1.00712e-22	At1g07650	XP_011098063.1 probable LRR receptor-like serine/threonine-protein kinase At1g07650 [Sesamum indicum]
Unigene0019367	16.69	22.35	16.62	0.09	0.23	0.2	6.74199	1.03563e-22	--	GER32220.1 serine protease inhibitor [Striga asiatica]
Unigene0024645	29.56	30.24	27.59	11.63	13.65	13.22	1.18261	1.04241e-22	KNAT7	XP_011072032.1 homeobox protein HD1 [Sesamum indicum]
Unigene0033615	3.8	4.67	4.67	0.13	0.22	0.11	4.83619	1.0495e-22	XXT1	XP_011090963.1 xyloglucan 6-xylosyltransferase 2 [Sesamum indicum]
Unigene0023839	42.27	46.5	32.99	13.49	15.26	16.05	1.44247	1.11465e-22	At1g01500	XP_011074539.1 uncharacterized protein At1g01500-like isoform X1 [Sesamum indicum]
Unigene0028838	32.08	33.19	25.03	104.86	96.39	105.33	-1.76347	1.13365e-22	--	XP_011097475.1 uncharacterized protein LOC105176389 [Sesamum indicum]
Unigene0018322	0.32	0.61	0.6	6.54	5.71	8.15	-3.73697	1.13395e-22	GALS1	XP_011083362.2 galactan beta-1,4-galactosyltransferase GALS1 [Sesamum indicum]
Unigene0000464	8.77	8.96	7.83	29.99	29.22	37.22	-1.91559	1.1783e-22	SPS2	XP_011082816.1 probable solanesyl-diphosphate synthase 3, chloroplastic [Sesamum indicum]
Unigene0035451	25.02	24.32	27.64	73.82	74.88	80.92	-1.57669	1.23875e-22	RPP2B	XP_018848651.1 PREDICTED: 60S acidic ribosomal protein P2B [Juglans regia]
Unigene0001231	9.52	12.94	5.96	71.55	60.76	72.89	-2.85205	1.25294e-22	PSY1	XP_016560212.1 PREDICTED: phytoene synthase 2, chloroplastic [Capsicum annuum]
Unigene0028921	1.29	1.86	3.31	23.11	20.53	20.78	-3.3179	1.39419e-22	UBGAT-I	BAH14962.1 UDP-sugar flavonoid 7-O-glycosyltransferase [Torenia hybrid cultivar]
Unigene0018547	40.72	38.21	22.51	7.16	8.17	6.75	2.19981	1.39419e-22	--	PNX96445.1 copia LTR rider [Trifolium pratense]
Unigene0033629	8.7	7.84	7.89	26.34	23.63	25.39	-1.62515	1.39419e-22	CNGC14	XP_011082041.1 probable cyclic nucleotide-gated ion channel 14 [Sesamum indicum]
Unigene0016006	9.35	10.94	12.54	1.52	2.44	2.18	2.4187	1.62575e-22	CXE2	XP_011074454.1 probable carboxylesterase 2 [Sesamum indicum]
Unigene0034695	0.28	0.16	0.15	4.85	3.66	3.88	-4.39232	1.70906e-22	R1A-10	XP_012856921.1 PREDICTED: putative late blight resistance protein homolog R1B-16 [Erythranthe guttata]
Unigene0006149	13.19	20.34	11.86	3.5	4.04	3.41	2.05144	1.73859e-22	--	XP_011077816.1 lipid droplet-associated hydrolase [Sesamum indicum]
Unigene0033293	1.47	1.26	0.33	22.67	28.73	18.54	-4.51451	1.76608e-22	At1g54200	XP_011072570.1 protein BIG GRAIN 1-like B isoform X1 [Sesamum indicum]
Unigene0019387	2.02	1.82	1.06	14.54	13.39	16.69	-3.18684	1.86622e-22	MAPKKK20	XP_022884307.1 mitogen-activated protein kinase kinase kinase 18-like [Olea europaea var. sylvestris] [Olea europaea]
Unigene0032880	0.19	0.23	0.2	7.55	6.83	6.25	-5.05633	1.88699e-22	HOX11	PIN25179.1 Transcription factor HEX [Handroanthus impetiginosus]
Unigene0030155	2.47	3	1.94	13.3	13.41	17.09	-2.56339	1.97149e-22	SPBC2A9.03	PIN13033.1 WD40-like repeat containing protein [Handroanthus impetiginosus]
Unigene0028692	61.56	56.74	63.82	220.32	174.37	185.09	-1.67062	2.0184e-22	MAP3K12	XP_011096900.1 uncharacterized protein LOC105175953 isoform X1 [Sesamum indicum]
Unigene0025797	4.13	5.11	2.39	0.31	0.24	0.33	3.7242	2.08195e-22	AP180	XP_011100365.1 clathrin coat assembly protein AP180-like [Sesamum indicum]
Unigene0029637	32.44	34.79	35.13	17.31	14.05	16.88	1.08535	2.25954e-22	ECI2	XP_024995684.1 enoyl-CoA delta isomerase 2, peroxisomal-like [Cynara cardunculus var. scolymus] [Cynara cardunculus]
Unigene0035702	5.98	3.13	3.53	59.46	58.51	32.87	-3.57695	2.2963e-22	UGT86A1	XP_011091585.1 UDP-glycosyltransferase 86A1-like [Sesamum indicum]
Unigene0016072	96.64	119.43	75.78	28.39	26.53	34	1.71465	2.39464e-22	--	PIN00968.1 hypothetical protein CDL12_26528 [Handroanthus impetiginosus]
Unigene0023662	18.98	23.82	20.31	9.02	9.93	10.71	1.08935	2.51393e-22	--	XP_020553381.1 uncharacterized protein LOC105174401 isoform X1 [Sesamum indicum]
Unigene0028023	1.71	2.23	2.05	11.15	11.45	17.55	-2.74477	2.58594e-22	IRX15	TEY43538.1 hypothetical protein Saspl_040485 [Salvia splendens]
Unigene0031009	6.07	7.76	7.33	34.24	28.06	27.26	-2.08151	2.63619e-22	PSBR	XP_021911129.1 photosystem II 10 kDa polypeptide, chloroplastic [Carica papaya]
Unigene0025855	0.69	0.97	0.72	11.22	8.36	9.41	-3.60652	2.74718e-22	GSTL2	PIN16717.1 Glutathione S-transferase [Handroanthus impetiginosus]
Unigene0022195	6.37	7.03	6.99	1.48	1.39	2.03	2.05701	3.02719e-22	BET12	XP_012842839.1 PREDICTED: bet1-like SNARE 1-2 [Erythranthe guttata]
Unigene0032744	0	0.19	0.22	11.22	8.23	9.55	-6.14429	3.17978e-22	--	PIN15002.1 hypothetical protein CDL12_12363 [Handroanthus impetiginosus]
Unigene0004789	6.07	4.54	8.03	45.52	37.56	33.2	-2.64113	3.26707e-22	PHOT1	AML78829.1 putative LOV domain-containing protein [Ajuga reptans]
Unigene0002859	0.92	1.69	1.4	11.01	10.17	16.89	-3.24698	3.31244e-22	BACOVA_02659	XP_011080849.1 uncharacterized protein LOC105164008 isoform X1 [Sesamum indicum]
Unigene0024549	88.52	62.72	72.68	25.06	23.52	27.59	1.55569	3.39789e-22	MLO1	GER28154.1 MLO-like protein, partial [Striga asiatica]
Unigene0014943	0.41	0.73	0.87	6.76	6.6	9.36	-3.4987	4.06163e-22	NAT7	PIM97956.1 Xanthine/uracil transporter [Handroanthus impetiginosus]
Unigene0026867	1.57	2.18	1.91	8.18	7.93	8.23	-2.10446	4.18894e-22	BHLH110	XP_020550875.1 transcription factor bHLH110 isoform X2 [Sesamum indicum]
Unigene0015011	1.42	1.42	1.36	12.97	10.83	18.89	-3.34544	4.46308e-22	FBP	XP_011077604.1 fructose-1,6-bisphosphatase, chloroplastic [Sesamum indicum]
Unigene0036678	255.76	367.21	316.02	123.13	134.75	145.63	1.21851	4.71372e-22	SP1L1	XP_012080403.1 protein SPIRAL1-like 3 [Jatropha curcas]
Unigene0016222	38.99	40.87	35.67	13.65	17.94	17.15	1.24509	4.94175e-22	XTH30	XP_011086421.1 probable xyloglucan endotransglucosylase/hydrolase protein 30 [Sesamum indicum]
Unigene0029176	38.5	40.41	41.31	16.43	16.12	19.93	1.19584	4.96401e-22	MSBP2	PIN20908.1 putative steroid membrane receptor Hpr6.6/25-Dx [Handroanthus impetiginosus]
Unigene0024913	16.33	28.55	11.39	0.16	0.64	0.18	5.84344	5.19259e-22	SAUR32	PHU14463.1 Auxin-responsive protein SAUR32 [Capsicum chinense]
Unigene0029260	0.33	0.4	0.73	19.39	13.61	20.57	-5.19739	5.4362e-22	PSAG	XP_011095644.1 photosystem I reaction center subunit V, chloroplastic [Sesamum indicum]
Unigene0031820	1.86	2.35	2.18	10.99	8.89	9.2	-2.18614	5.55821e-22	PLR_Lp1	XP_011092719.2 uncharacterized protein LOC105172840 [Sesamum indicum]
Unigene0002520	0.41	0.5	0.91	5.67	6.13	6.22	-3.30759	6.17183e-22	--	XP_011091487.1 uveal autoantigen with coiled-coil domains and ankyrin repeats [Sesamum indicum]
Unigene0036359	150.12	158.29	84	818.14	766.12	1028.57	-2.73518	6.2062e-22	EXPA4	XP_011084824.1 expansin-A2 [Sesamum indicum]
Unigene0018610	29.81	43.01	47.96	11.92	9.38	12.7	1.82877	6.41356e-22	NIP1-1	XP_012849365.1 PREDICTED: aquaporin NIP1-1-like [Erythranthe guttata]
Unigene0005295	3.56	2.36	2.73	20.75	14.25	17.6	-2.60429	6.71977e-22	ER1	XP_011081595.1 LRR receptor-like serine/threonine-protein kinase ERECTA [Sesamum indicum]
Unigene0031900	28.33	29.27	20.43	4.02	3.77	6.73	2.42599	6.9131e-22	RER4	KZV24884.1 hypothetical protein F511_27974 [Dorcoceras hygrometricum]
Unigene0033144	0.33	0.23	0.27	3.77	3.9	3.73	-3.77978	6.96131e-22	XA21	XP_012849179.1 PREDICTED: probable LRR receptor-like serine/threonine-protein kinase At3g47570 [Erythranthe guttata]
Unigene0020963	3.62	3.14	2.82	11.58	13.08	13.41	-1.99056	7.17015e-22	R1B-12	XP_012856172.1 PREDICTED: putative late blight resistance protein homolog R1B-16 [Erythranthe guttata]
Unigene0015163	9.98	11.59	11.43	3.55	4.4	3.34	1.54742	7.45566e-22	--	PIN25331.1 hypothetical protein CDL12_01928 [Handroanthus impetiginosus]
Unigene0031554	0.45	0.46	0.44	5.93	4.66	4.03	-3.43691	8.52079e-22	RBOHC	KZV57929.1 whitefly-induced gp91-phox [Dorcoceras hygrometricum]
Unigene0028597	0.1	0.17	0.06	5.6	8.65	5.4	-5.89592	8.53014e-22	MTPA2	PHT42423.1 Metal tolerance protein 1 [Capsicum baccatum]
Unigene0026697	9.91	10.48	11.27	4.06	4.25	3.9	1.3746	8.58239e-22	COL15	TEY87875.1 hypothetical protein Saspl_012246 [Salvia splendens]
Unigene0000568	0.55	0.33	0.38	11.8	11.82	13.46	-4.87915	8.94854e-22	--	-
Unigene0005829	1.62	1.5	1.41	7.88	10.15	9.38	-2.59712	9.01185e-22	DAR2	XP_011076768.1 protein DA1-related 2 isoform X3 [Sesamum indicum]
Unigene0013981	28.48	27.36	32.75	84.38	81.98	79.03	-1.46986	9.03929e-22	CIPK32	PIN17466.1 Serine/threonine protein kinase [Handroanthus impetiginosus]
Unigene0028450	50.72	45.76	44.29	124.84	130.12	139.68	-1.4872	1.04506e-21	At4g32940	XP_027081436.1 vacuolar-processing enzyme-like [Coffea arabica]
Unigene0024605	14.67	25.98	23.94	105.3	100.69	96.99	-2.22984	1.28283e-21	PDF2.2	XP_010250779.1 PREDICTED: defensin Ec-AMP-D2-like [Nelumbo nucifera]
Unigene0012003	10.03	10.07	9.28	32.77	43.96	38.73	-1.97449	1.29564e-21	PAP17	TEY45110.1 hypothetical protein Saspl_023129 [Salvia splendens]
Unigene0019321	8.27	6.53	9.24	2.25	1.96	1.87	1.98329	1.30464e-21	R1A-10	XP_011072557.1 putative late blight resistance protein homolog R1B-16 isoform X1 [Sesamum indicum]
Unigene0025590	21.63	28.41	29.33	81.75	83.55	92.02	-1.6969	1.31694e-21	RPL12	KZV35166.1 hypothetical protein F511_06872 [Dorcoceras hygrometricum]
Unigene0025053	1.57	2.87	2.05	12.77	15.1	13.59	-2.67543	1.37797e-21	--	-
Unigene0007522	0.18	0.06	0.15	12.47	6.14	10.32	-6.21295	1.42605e-21	PEX1	XP_011078434.1 leucine-rich repeat extensin-like protein 4 [Sesamum indicum]
Unigene0026243	29.3	18.1	29.61	5.28	6.32	5.31	2.18717	1.42854e-21	At5g63670	XP_011074374.1 transcription elongation factor SPT4 homolog 2 [Sesamum indicum]
Unigene0002261	42.34	40.08	45.73	22.74	18.94	20.42	1.04517	1.45549e-21	PHS1	XP_012851351.1 PREDICTED: alpha-1,4 glucan phosphorylase L-1 isozyme, chloroplastic/amyloplastic [Erythranthe guttata]
Unigene0028569	6.45	8.04	7.03	2.12	1.9	2.31	1.7654	1.4975e-21	OFUT23	XP_022845883.1 O-fucosyltransferase 23-like [Olea europaea var. sylvestris] [Olea europaea]
Unigene0029015	72.81	66.79	84.64	280.44	245.54	229.4	-1.75216	1.52872e-21	RTNLB1	XP_012858683.1 PREDICTED: reticulon-like protein B1 [Erythranthe guttata]
Unigene0021054	7.32	7.22	5.17	0.98	1.43	1.25	2.42901	1.70674e-21	--	XP_011092191.1 uncharacterized protein LOC105172455 isoform X1 [Sesamum indicum]
Unigene0033647	19.09	24.91	22.5	8.14	6.92	6.09	1.6527	1.74176e-21	--	OIS98892.1 hypothetical protein A4A49_02415 [Nicotiana attenuata]
Unigene0034116	0.27	0.62	0.59	5.55	5.46	5.75	-3.50135	1.8601e-21	--	GER31997.1 hypothetical protein STAS_08043 [Striga asiatica]
Unigene0013985	0.31	0.6	0.62	8.41	7.99	10.16	-4.11765	2.16108e-21	ANN2	KAE7998090.1 hypothetical protein FH972_002668 [Carpinus fangiana]
Unigene0027644	18.04	22.8	16.97	72.22	71.94	97.41	-2.06305	2.2846e-21	PGRL1A	XP_011081060.1 PGR5-like protein 1A, chloroplastic [Sesamum indicum]
Unigene0032116	52.75	30.83	91.94	802.83	779.18	576.87	-3.62058	2.63577e-21	--	GER54566.1 maternal effect embryo arrest 59 [Striga asiatica]
Unigene0009423	14.7	16.91	5.08	156.95	160.02	217.75	-3.86532	2.68672e-21	45566	GER38443.1 organic cation/carnitine transporter 1 [Striga asiatica]
Unigene0023028	6.36	4.43	2.94	32.89	40.95	47.02	-3.13793	2.74225e-21	JA2L	KAA3467626.1 NAC domain-containing protein 72-like [Gossypium australe]
Unigene0033208	2.54	3.4	1.33	34.13	20.67	38.28	-3.67844	2.76053e-21	PETH	XP_019177456.1 PREDICTED: ferredoxin--NADP reductase, leaf-type isozyme, chloroplastic [Ipomoea nil]
Unigene0029349	3.08	3.55	2.55	0.45	0.56	0.42	2.68248	2.83203e-21	--	GER43329.1 protein phosphatase 2C family protein [Striga asiatica]
Unigene0025658	5.56	4.28	9.08	61.17	53.49	41.51	-3.04513	3.18323e-21	--	XP_011075190.1 uncharacterized protein LOC105159716 [Sesamum indicum]
Unigene0031280	7.79	7.84	6.38	23.39	21.85	22.8	-1.62822	3.18773e-21	MIF2	VVA29907.1 PREDICTED: mini zinc finger [Prunus dulcis]
Unigene0014236	5.59	4.27	9.33	0.24	0.04	0.15	5.47987	3.37156e-21	CUT1	XP_011076851.1 3-ketoacyl-CoA synthase 6-like [Sesamum indicum]
Unigene0035318	0.74	0.62	1.04	11.8	10.07	15.04	-3.94291	3.49951e-21	NHL26	XP_011075890.1 NDR1/HIN1-like protein 1 [Sesamum indicum]
Unigene0006463	45.17	41.15	32.86	164.54	150.53	138.19	-1.9272	3.60907e-21	CXE12	PIN15299.1 Arylacetamide deacetylase [Handroanthus impetiginosus]
Unigene0013531	22.11	16.95	17.44	2.66	4.12	3.61	2.44306	3.62456e-21	--	-
Unigene0030893	6.08	7.53	6.42	2.11	2.04	1.8	1.7512	3.68892e-21	RAP2-7	XP_012834706.1 PREDICTED: ethylene-responsive transcription factor RAP2-7 isoform X2 [Erythranthe guttata]
Unigene0005162	19.19	29.29	35.24	5.03	5.44	3.04	2.63154	4.00873e-21	NAC081	XP_011099683.1 NAC domain-containing protein 2-like [Sesamum indicum]
Unigene0002082	6.82	6.73	7.87	0.15	0.13	0.11	5.77934	4.263e-21	--	XP_006355482.1 PREDICTED: uncharacterized protein LOC102579011 [Solanum tuberosum]
Unigene0031622	0.33	0.05	0.2	6.37	12	7.03	-5.45263	4.38179e-21	ATL43	XP_011069943.1 RING-H2 finger protein ATL43-like [Sesamum indicum]
Unigene0021364	1.63	1.2	1.89	10.95	12.21	11.9	-2.89297	4.69668e-21	--	PIN22744.1 hypothetical protein CDL12_04561 [Handroanthus impetiginosus]
Unigene0025711	0	0	0.15	18.59	11.68	12.25	-8.14704	4.70869e-21	ATHB-20	XP_023737346.1 homeobox-leucine zipper protein ATHB-13-like [Lactuca sativa]
Unigene0000428	54.7	74.23	64.56	29.81	29.15	30.85	1.10731	4.86304e-21	NQR	XP_030966785.1 NADPH:quinone oxidoreductase-like [Quercus lobata]
Unigene0022947	0.3	0.84	1.15	17.91	13.78	22.32	-4.55981	4.92404e-21	--	-
Unigene0015056	0.21	0.45	0.45	9.75	6.88	5.85	-4.34001	5.1362e-21	At3g02645	XP_011073606.1 putative UPF0481 protein At3g02645 [Sesamum indicum]
Unigene0036091	2.92	2.85	1.48	19.04	23.26	18.93	-3.07819	5.17562e-21	BZIP53	XP_011083621.1 bZIP transcription factor 44 [Sesamum indicum]
Unigene0025453	3.83	5.05	4.41	14.53	16.05	14.63	-1.7663	5.38007e-21	COP1	XP_011085492.1 E3 ubiquitin-protein ligase COP1-like isoform X1 [Sesamum indicum]
Unigene0025536	1.22	0.97	1.3	8.89	9.94	7.68	-2.92524	5.59343e-21	--	XP_011087650.1 uncharacterized protein LOC105169073 [Sesamum indicum]
Unigene0027309	28.85	18.16	32.45	4.91	5.33	3.32	2.55087	6.04469e-21	--	PIN14122.1 hypothetical protein CDL12_13241 [Handroanthus impetiginosus]
Unigene0003946	107	182.33	313.12	25.6	27.84	27.52	2.89556	6.09712e-21	LEA14-A	KZV42993.1 late embryogenesis (Lea)-like protein [Dorcoceras hygrometricum]
Unigene0002732	8.24	10.08	11.88	33.8	33.03	34.82	-1.75099	6.19246e-21	At5g58300	PIN05975.1 Serine/threonine protein kinase [Handroanthus impetiginosus]
Unigene0028892	10.4	10.74	12.36	29.68	31.06	29.31	-1.42657	7.43131e-21	--	XP_011097887.1 uncharacterized protein LOC105176694 [Sesamum indicum]
Unigene0012988	41.43	34.06	30.73	10.89	8.65	9.72	1.86005	8.03426e-21	--	XP_012837449.1 PREDICTED: uncharacterized protein LOC105957994 [Erythranthe guttata]
Unigene0035791	9.27	12.42	10.11	3.53	3.57	3.78	1.54735	8.23499e-21	PIX7	PIN17019.1 Serine/threonine protein kinase [Handroanthus impetiginosus]
Unigene0013442	5.93	8.02	10.8	51.64	45.67	57.42	-2.64425	9.34443e-21	--	-
Unigene0030995	3.39	4.99	3.69	1.1	1.02	1.3	1.81936	9.71892e-21	KAO1	RXH76049.1 hypothetical protein DVH24_001628 [Malus domestica]
Unigene0002337	6.26	7.99	5.87	45.91	38.34	29.66	-2.50119	9.7564e-21	HIPP09	PIN20986.1 Copper chaperone [Handroanthus impetiginosus]
Unigene0034388	34.37	17.95	33.1	0	0.28	0	8.253	9.7564e-21	--	TEY57334.1 type II keratin, basic [Salvia splendens]
Unigene0014338	123.81	68.52	135.94	20.75	19.93	25.56	2.30911	9.7564e-21	FRO2	XP_011092779.2 ferric reduction oxidase 2 [Sesamum indicum]
Unigene0015972	0.14	0.62	1.15	13.02	17.24	16.8	-4.62286	1.00676e-20	--	XP_011088316.1 B3 domain-containing protein Os11g0197600-like [Sesamum indicum]
Unigene0027764	17.73	16.87	23.37	5.18	5.82	5.27	1.83309	1.01078e-20	Os04g0679100	PIN25031.1 Vesicle coat protein clathrin, light chain [Handroanthus impetiginosus]
Unigene0020337	13.2	11.72	6.68	1.48	1.35	0.95	3.06347	1.02828e-20	--	-
Unigene0000496	122.9	179.03	168.74	497.64	523.47	623.57	-1.80502	1.1028e-20	FDH1	XP_011098485.1 formate dehydrogenase, mitochondrial-like [Sesamum indicum]
Unigene0019072	0.09	0.44	0.61	9.35	7.04	8.78	-4.4646	1.11531e-20	At1g32060	XP_016727285.1 PREDICTED: phosphoribulokinase, chloroplastic-like [Gossypium hirsutum]
Unigene0028033	34.46	44.52	37.43	101.72	95.19	101.56	-1.35837	1.11531e-20	EMB1444	PIN12973.1 hypothetical protein CDL12_14412 [Handroanthus impetiginosus]
Unigene0006575	3.44	3.82	3.66	0.57	0.68	0.58	2.57706	1.12788e-20	ABCG11	KAA8546785.1 hypothetical protein F0562_003214 [Nyssa sinensis]
Unigene0013458	0.09	0.11	0.08	7.49	7.67	8.98	-6.42986	1.32542e-20	BHLH75	XP_011080441.1 transcription factor BEE 1-like [Sesamum indicum]
Unigene0004972	70.9	68.88	62.38	22.65	25.44	15.63	1.66568	1.33535e-20	RE1	BBG93649.1 wall-associated kinase 2 [Prunus dulcis]
Unigene0034498	10.02	11.68	10.92	30.74	30.49	34.82	-1.55803	1.36278e-20	NRP2	XP_011071637.1 NAP1-related protein 2-like [Sesamum indicum]
Unigene0031504	268.51	227.23	156.91	62.63	61.98	63.76	1.79274	1.36794e-20	--	XP_011086107.1 stem-specific protein TSJT1-like [Sesamum indicum]
Unigene0023790	98.11	87.29	102.53	47.49	48.62	40.93	1.07112	1.39603e-20	GPDH	PIN17803.1 Glycerol-3-phosphate dehydrogenase/dihydroxyacetone 3-phosphate reductase [Handroanthus impetiginosus]
Unigene0002191	3.32	3.63	3.63	13.34	14.53	12.63	-1.93658	1.40963e-20	CAD1	PIN07992.1 Alcohol dehydrogenase, class V [Handroanthus impetiginosus]
Unigene0027298	52.19	51.1	79.68	16.45	16.65	20.07	1.78292	1.4213e-20	HIPP26	GER42340.1 heavy metal transport/detoxification superfamily protein [Striga asiatica]
Unigene0001063	31.07	25.18	19.8	2.24	2.59	5.08	2.93999	1.42958e-20	At5g63180	PIN25521.1 Pectate lyase [Handroanthus impetiginosus]
Unigene0033977	7.37	6.48	4.2	0.23	0.56	0.45	3.86359	1.4394e-20	NPC2	GER55033.1 non-specific phospholipase C2 [Striga asiatica]
Unigene0011568	36.95	34.04	25.52	123.69	135.39	116.58	-1.96068	1.44475e-20	NOP2C	PIN11510.1 tRNA and rRNA cytosine-C5-methylase (nucleolar protein NOL1/NOP2) [Handroanthus impetiginosus]
Unigene0027432	23.65	11.74	25.73	184.48	196.16	141.24	-3.094	1.4598e-20	HSR201	XP_012832498.1 PREDICTED: benzyl alcohol O-benzoyltransferase-like [Erythranthe guttata]
Unigene0016473	10.39	20.04	18.49	3.62	3.72	3.86	2.12693	1.55301e-20	WNK5	XP_011095119.1 probable serine/threonine-protein kinase WNK5 [Sesamum indicum]
Unigene0029817	0	0.07	0.05	45.01	38.74	53.37	-10.1582	1.5958e-20	--	XP_011086919.1 uncharacterized protein LOC105168511 [Sesamum indicum]
Unigene0010067	34.5	25.39	28.07	10.37	9.01	8.08	1.67952	1.60907e-20	At4g12980	XP_022875218.1 cytochrome b561 and DOMON domain-containing protein At3g25290-like [Olea europaea var. sylvestris] [Olea europaea]
Unigene0033911	0.27	0.62	0.67	5.5	5.3	5.43	-3.37905	1.82254e-20	--	XP_011093777.1 pollen-specific leucine-rich repeat extensin-like protein 1 [Sesamum indicum]
Unigene0010082	1.35	1.12	1.25	7.68	8.73	7.37	-2.67637	1.89971e-20	At1g01540	XP_011069664.1 probable serine/threonine-protein kinase At1g01540 [Sesamum indicum]
Unigene0007210	5.3	6.56	4.63	23.73	20.75	24.52	-2.065	1.92001e-20	CBSX6	XP_022890031.1 CBS domain-containing protein CBSX6-like [Olea europaea var. sylvestris] [Olea europaea]
Unigene0033945	32.05	38.71	29.78	7.35	5.21	10.31	2.13624	2.02768e-20	GATA9	XP_011072418.1 GATA transcription factor 12-like [Sesamum indicum]
Unigene0028853	0.16	0	0.21	5.55	3.98	4.06	-5.19888	2.06563e-20	At4g34220	XP_011088209.1 probable LRR receptor-like serine/threonine-protein kinase At4g37250 [Sesamum indicum]
Unigene0027070	15.18	14.87	15.96	6.28	7.07	7.37	1.15092	2.14173e-20	QSOX1	XP_011070653.1 sulfhydryl oxidase 2 isoform X1 [Sesamum indicum]
Unigene0029455	0.04	0.09	0.13	6.19	5.17	6.97	-6.13955	2.23507e-20	GSVIVT00026920001	XP_011079616.1 probable polygalacturonase isoform X2 [Sesamum indicum]
Unigene0035833	31.63	32.63	30.3	4.2	4.03	8.56	2.49363	2.31165e-20	SCPL45	XP_011086871.1 serine carboxypeptidase-like 45 [Sesamum indicum]
Unigene0029048	3.14	1.36	9.93	1264.41	987.48	924.89	-7.78235	2.43008e-20	At4g12490	TEY61718.1 vesicle-associated membrane protein 7 [Salvia splendens]
Unigene0031117	65.04	61.72	65.32	29.59	29.57	36.15	1.01101	2.54965e-20	--	XP_012830405.1 PREDICTED: vacuolar protein 8 [Erythranthe guttata]
Unigene0028831	124.19	93.13	69.9	16.46	15.54	25.16	2.32908	2.56693e-20	UGT84A13	PIN07991.1 UDP-glucuronosyl and UDP-glucosyl transferase [Handroanthus impetiginosus]
Unigene0015468	12.92	17.49	17.89	4.8	5.3	4.74	1.70253	2.74291e-20	--	-
Unigene0033333	10.53	9.26	10.67	55.28	45.48	37.96	-2.18719	3.07937e-20	HDT1	PIN18400.1 Histone deacetylase [Handroanthus impetiginosus]
Unigene0004196	14.03	18.01	14.71	48.01	42.75	51.38	-1.60427	3.27237e-20	SAMDC1	XP_022878379.1 S-adenosylmethionine decarboxylase proenzyme-like [Olea europaea var. sylvestris] [Olea europaea]
Unigene0015611	63.89	60.31	68.58	22.92	26.91	31.93	1.23749	3.41222e-20	At2g25737	XP_011081835.1 sulfite exporter TauE/SafE family protein 3 [Sesamum indicum]
Unigene0034361	30.45	29.29	34.73	14.75	10.7	12.82	1.30364	3.42316e-20	TRM32	XP_011092426.1 uncharacterized protein LOC105172605 [Sesamum indicum]
Unigene0019997	6.86	10.07	3.69	0.09	0	0.1	6.7619	3.47241e-20	At5g57480	XP_022867605.1 AAA-ATPase At5g57480-like [Olea europaea var. sylvestris] [Olea europaea]
Unigene0031250	0.06	0.07	0.14	10.82	9.43	11.2	-6.86396	3.73554e-20	ATG8CL	OMP14070.1 Autophagy protein Atg8 ubiquitin-like protein [Corchorus olitorius]
Unigene0000231	1.21	1.87	2.1	11.68	8.69	11.48	-2.62027	3.77188e-20	R1A-10	XP_011072557.1 putative late blight resistance protein homolog R1B-16 isoform X1 [Sesamum indicum]
Unigene0034014	4.34	3.5	4.44	18.27	18.26	15.8	-2.09133	4.07286e-20	At2g46620	XP_011084544.1 AAA-ATPase At2g46620 [Sesamum indicum]
Unigene0028055	221.93	223.23	174.55	99.23	94.41	100.54	1.07489	4.08682e-20	LACS6	XP_011092034.1 long chain acyl-CoA synthetase 6, peroxisomal-like [Sesamum indicum]
Unigene0028572	0.37	0.15	0.26	11.93	7.33	8.98	-5.17812	4.10895e-20	CSLC12	PIM99428.1 Xyloglucan 6-xylosyltransferase [Handroanthus impetiginosus]
Unigene0009567	5.02	4.44	10.21	68.08	52.26	73.25	-3.29894	4.35611e-20	FLZ3	XP_019259283.1 PREDICTED: uncharacterized protein LOC109237431 [Nicotiana attenuata]
Unigene0009884	10.49	13.09	10.58	4.09	4.07	3.66	1.53108	4.43157e-20	Hgsnat	PIN01022.1 heparan-alpha-glucosaminide N-acetyltransferase [Handroanthus impetiginosus]
Unigene0023866	13.77	12.29	21.53	3.54	2.42	3.54	2.32466	4.52601e-20	XTH28	XP_011070536.1 probable xyloglucan endotransglucosylase/hydrolase protein 28 [Sesamum indicum]
Unigene0004364	1.06	1.29	3.33	22.9	27.65	31.61	-3.85447	4.65446e-20	JGB	XP_012857125.1 PREDICTED: guanine nucleotide-binding protein subunit beta-like protein [Erythranthe guttata]
Unigene0026831	27.5	38.96	37.68	10.6	12.52	13.95	1.4902	5.53406e-20	UNE12	GAV73442.1 HLH domain-containing protein [Cephalotus follicularis]
Unigene0027846	15.28	18.94	15.17	44.9	46.03	50.27	-1.51545	5.53406e-20	RABA6A	PIM98529.1 GTPase Rab11/YPT3, small G protein superfamily [Handroanthus impetiginosus]
Unigene0023017	1.63	1.52	0.93	10.45	9.43	10.45	-2.8941	5.99424e-20	--	XP_022893000.1 uncharacterized protein LOC111407616 [Olea europaea var. sylvestris] [Olea europaea]
Unigene0010402	2.04	3.07	3.09	12.61	12.04	13.31	-2.21078	6.40726e-20	SCL7	XP_011099604.1 scarecrow-like protein 4 [Sesamum indicum]
Unigene0030516	0	0	0.16	20.75	9.53	17.22	-8.21371	6.50278e-20	At5g41890	XP_011083333.1 GDSL esterase/lipase At5g08460 [Sesamum indicum]
Unigene0031059	13.15	11.83	9.65	0.09	0.45	0.29	5.38277	6.51082e-20	--	-
Unigene0020878	4.2	3.68	6.26	34.46	32.62	24.17	-2.69004	7.07778e-20	HIPP32	XP_012857111.1 PREDICTED: uncharacterized protein DDB_G0290685-like isoform X2 [Erythranthe guttata]
Unigene0022138	3.3	5	4.6	24	21.11	19.37	-2.32148	7.0927e-20	BZIP11	PIN15170.1 hypothetical protein CDL12_12182 [Handroanthus impetiginosus]
Unigene0024032	108.94	100.31	68	24.12	26.22	31.61	1.75837	7.20322e-20	NPF3.1	XP_011070816.1 protein NRT1/ PTR FAMILY 3.1 [Sesamum indicum]
Unigene0008842	0.4	0.19	0.33	5.63	5.49	4.7	-4.10397	7.56221e-20	UGT80B1	PIN23160.1 UDP-glucuronosyl and UDP-glucosyl transferase [Handroanthus impetiginosus]
Unigene0029401	21.73	19.42	35.2	5.74	4.34	5.32	2.3097	7.85997e-20	MYB94	AKV71947.1 R2R3-MYB protein [Rehmannia glutinosa]
Unigene0032384	23.02	28.1	19.3	6.17	7.49	8.66	1.65765	8.96849e-20	PICBP	XP_011091813.1 uncharacterized protein LOC105172158 [Sesamum indicum]
Unigene0034077	1.47	1.4	1.58	6.58	6.26	7.33	-2.18033	9.19991e-20	At5g59700	XP_011089398.1 receptor-like protein kinase HERK 1 [Sesamum indicum]
Unigene0029711	38.61	40.91	54.59	156.46	145.85	181.2	-1.85013	9.26737e-20	MODA	XP_011093633.1 NADP-dependent malic enzyme [Sesamum indicum]
Unigene0035712	5.74	5.66	6.97	20.63	22.9	22.15	-1.8381	9.8898e-20	CPRD49	XP_011095009.1 GDSL esterase/lipase CPRD49 [Sesamum indicum]
Unigene0020839	17.34	25.58	28.39	100.78	85.79	106.68	-2.03995	9.90553e-20	KCS1	PIN22536.1 Very-long-chain 3-oxoacyl-CoA synthase [Handroanthus impetiginosus]
Unigene0001608	3.77	2.59	3.97	26.07	32.95	29.04	-3.09165	1.0337e-19	tma7	TEY35648.1 hypothetical protein Saspl_030484 [Salvia splendens]
Unigene0030411	2.34	1.93	3.35	22.3	18.34	13.97	-2.8413	1.03395e-19	--	XP_022846163.1 uncharacterized protein LOC111368890 isoform X4 [Olea europaea var. sylvestris] [Olea europaea]
Unigene0035198	16.77	44.98	15.76	0.11	0.42	0.36	6.44443	1.03988e-19	--	-
Unigene0025865	6.6	5.77	4.46	0.45	0.53	0.17	3.87133	1.06398e-19	--	-
Unigene0032848	70.16	143.8	131.14	616.18	669.13	915.37	-2.67286	1.23015e-19	co-2	KZV54442.1 polyphenol oxidase, chloroplastic-like [Dorcoceras hygrometricum]
Unigene0023524	0.83	2.02	2.04	13.26	13.53	13.39	-3.03857	1.32197e-19	--	XP_027091804.1 uncharacterized protein LOC113712524 isoform X1 [Coffea arabica]
Unigene0010292	0.5	0.3	0.31	32.24	14.07	25.68	-6.01916	1.37975e-19	--	KHN45088.1 Photosystem II 5 kDa protein, chloroplastic [Glycine soja]
Unigene0036200	13.95	10.54	10.27	0.08	0.52	0.09	5.65469	1.38474e-19	ATL21B	XP_012843960.1 PREDICTED: putative RING-H2 finger protein ATL21A [Erythranthe guttata]
Unigene0028713	39.47	38	42.5	108.91	105.5	94.79	-1.36587	1.42216e-19	D6PKL1	KZV32885.1 hypothetical protein F511_01396 [Dorcoceras hygrometricum]
Unigene0005947	2.98	2.82	4.06	23.16	24.07	20.22	-2.77416	1.52622e-19	--	-
Unigene0032730	2.45	2.76	3.66	15.84	13.4	14.69	-2.3082	1.61442e-19	--	XP_011085842.1 uncharacterized protein LOC105167721 isoform X1 [Sesamum indicum]
Unigene0031808	28.68	25.33	20.98	79.67	90.18	95.44	-1.8228	1.63623e-19	CLC-C	PIN10391.1 Cl- channel CLC-7 and related proteins (CLC superfamily) [Handroanthus impetiginosus]
Unigene0021784	0.48	0.77	0.97	5.59	5.63	7.5	-3.07595	1.6949e-19	R1A-10	XP_011072557.1 putative late blight resistance protein homolog R1B-16 isoform X1 [Sesamum indicum]
Unigene0025057	15.18	13.05	15.68	51.74	43.96	45.01	-1.6801	1.77001e-19	CGL160	XP_011100203.1 uncharacterized protein LOC105178437 [Sesamum indicum]
Unigene0025898	130.6	144.19	144.94	286.43	295.02	302.93	-1.0752	1.82275e-19	RPS15	PIN08837.1 40S ribosomal protein S15 [Handroanthus impetiginosus]
Unigene0004505	5.41	4.94	10.23	52.34	49.3	44.44	-2.82744	1.82768e-19	PAE8	XP_011073252.1 pectin acetylesterase 8-like [Sesamum indicum]
Unigene0025436	1.32	1.81	3.26	16.57	16.73	18.46	-3.01795	1.91315e-19	TPS6	PIN15921.1 Trehalose-6-phosphate synthase component TPS1 [Handroanthus impetiginosus]
Unigene0001959	0.75	0.98	1.29	5.75	5.03	5.96	-2.47068	2.01197e-19	LNG1	XP_011087361.1 protein LONGIFOLIA 2 [Sesamum indicum]
Unigene0024077	0.53	0.55	0.06	21.34	9.87	22.68	-5.56291	2.08552e-19	GAST1	KDO50409.1 hypothetical protein CISIN_1g033715mg [Citrus sinensis]
Unigene0007788	50.61	52.31	54.54	180.12	139.74	194.29	-1.7072	2.09351e-19	ACBP3	XP_011092638.1 acyl-CoA-binding protein [Sesamum indicum]
Unigene0022321	17.73	14.87	22.04	4.61	3.93	2.77	2.27236	2.23307e-19	ASAT1	PIN07314.1 Long-chain-alcohol O-fatty-acyltransferase [Handroanthus impetiginosus]
Unigene0032434	73.02	57.03	75.24	26.61	28.22	21.59	1.42564	2.26101e-19	tif34	XP_011091371.1 uncharacterized protein LOC105171827 [Sesamum indicum]
Unigene0015726	4.31	6.67	6.1	27.02	21.42	26.83	-2.13977	2.32169e-19	At5g42250	XP_011099657.1 alcohol dehydrogenase-like 7 [Sesamum indicum]
Unigene0030165	14.08	13.37	19.11	4.62	5.31	3.99	1.74193	2.34804e-19	Y-2	XP_011098862.1 uncharacterized protein At3g27210-like [Sesamum indicum]
Unigene0015410	6.65	8.59	7.34	2.46	2.49	2.25	1.64898	2.35106e-19	GT-3B	XP_011082272.1 trihelix transcription factor GT-3b-like [Sesamum indicum]
Unigene0034287	0.94	1.94	1.73	12.58	10.21	14.66	-3.02213	2.37639e-19	HCF136	XP_011075300.1 photosystem II stability/assembly factor HCF136, chloroplastic isoform X1 [Sesamum indicum]
Unigene0031316	0	0	0	14.18	9.58	12.33	-13.5543	2.40566e-19	MIK1	XP_020548767.1 leucine-rich repeat receptor-like protein kinase PXL1, partial [Sesamum indicum]
Unigene0001853	3.34	5.12	3.59	0.1	0.13	0.07	5.32793	2.56229e-19	--	XP_022894698.1 uncharacterized protein LOC111409031 [Olea europaea var. sylvestris] [Olea europaea]
Unigene0002768	4.73	1.6	0.65	463.5	573.11	447.94	-7.73258	2.78333e-19	--	XP_020549560.1 MLP-like protein 34 [Sesamum indicum]
Unigene0035254	7.72	10.4	9.62	30.94	30.44	28.63	-1.69812	2.78708e-19	BHLH094	QHR96992.1 basic helix-loop-helix transcription factor bHLH79-like protein [Isodon rubescens]
Unigene0011027	1.14	1.44	1.22	8.33	7.43	9.32	-2.72247	2.90144e-19	PILS7	XP_011096969.1 protein PIN-LIKES 7 isoform X1 [Sesamum indicum]
Unigene0030433	2.41	4.24	3.82	21.95	32.51	46.62	-3.27116	2.93612e-19	--	-
Unigene0025498	20.98	23.97	8.48	155.59	177.45	194.28	-3.30296	3.15679e-19	--	OMP01472.1 hypothetical protein COLO4_11838 [Corchorus olitorius]
Unigene0025806	9.76	10.59	9.66	4.27	4.49	4.29	1.20139	3.18917e-19	RBP47C	XP_022894354.1 polyadenylate-binding protein RBP47-like [Olea europaea var. sylvestris] [Olea europaea]
Unigene0029270	60.03	54.95	63.77	31.99	28.88	25.7	1.046	3.24522e-19	CTR1	PIN10259.1 Tyrosine kinase [Handroanthus impetiginosus]
Unigene0029068	37.98	34.32	29.62	97.47	108.92	109.01	-1.62975	3.39675e-19	CYP73A16	XP_002523952.1 trans-cinnamate 4-monooxygenase [Ricinus communis]
Unigene0000754	19.8	20.87	20.68	10.84	8.26	8.73	1.14042	3.45747e-19	--	XP_011087351.1 uncharacterized protein LOC105168867 [Sesamum indicum]
Unigene0008626	8.07	5.9	4.27	37.46	34.05	34.35	-2.53698	3.644e-19	D6PKL3	XP_011098415.1 protein kinase PVPK-1 [Sesamum indicum]
Unigene0023860	0.29	0.49	0.47	4.95	5.06	3.56	-3.44042	3.83493e-19	LRK10L-1.1	XP_011097161.1 LEAF RUST 10 DISEASE-RESISTANCE LOCUS RECEPTOR-LIKE PROTEIN KINASE-like 1.4 [Sesamum indicum]
Unigene0012121	31.52	28.72	27.79	8.99	11.95	10.77	1.47306	4.13917e-19	TSPO	EYU46687.1 hypothetical protein MIMGU_mgv1a021287mg [Erythranthe guttata]
Unigene0035906	162.85	129.42	177.22	68.71	65.25	70.45	1.19963	4.17263e-19	PMA3	XP_011087207.1 plasma membrane ATPase 3 [Sesamum indicum]
Unigene0019181	0.05	0.03	0.09	7.9	5.7	3.25	-6.63107	4.23445e-19	--	XP_011080258.1 uncharacterized protein LOC105163554 [Sesamum indicum]
Unigene0027123	2.58	2.41	4.41	42.46	43.95	20.04	-3.50137	4.24637e-19	HST	ADG46003.1 hydroxycinnamoyl transferase [Salvia miltiorrhiza]
Unigene0006580	2.55	2.19	3.62	15.54	13.94	12.22	-2.31847	4.3574e-19	SCAR2	XP_011077501.1 protein SCAR2 [Sesamum indicum]
Unigene0004877	26.48	33.62	41.18	11.71	13.53	12.81	1.41238	4.4203e-19	LRK10L-1.3	PIN03329.1 Serine/threonine protein kinase [Handroanthus impetiginosus]
Unigene0032183	1.66	2.1	2.13	0.11	0.1	0.16	3.99267	4.48584e-19	--	XP_011096807.1 uncharacterized protein LOC105175876 isoform X1 [Sesamum indicum]
Unigene0027872	0.41	0.44	0.42	5.22	5.47	5.65	-3.68551	4.54935e-19	CDC2A	XP_022854579.1 cell division control protein 2 homolog A-like isoform X1 [Olea europaea var. sylvestris] [Olea europaea]
Unigene0006291	2.46	1.67	3.7	38	28.18	22.68	-3.50445	4.62632e-19	Mgst3	KAF3958538.1 hypothetical protein CMV_016567, partial [Castanea mollissima]
Unigene0030458	16.77	17.08	17.41	36.35	39.12	37.91	-1.14526	4.75469e-19	At1g47790	XP_011083092.1 uncharacterized protein LOC105165697 isoform X1 [Sesamum indicum]
Unigene0028975	0.5	0.37	0.64	5.01	5.64	6.82	-3.53226	4.7784e-19	PAP16	XP_011075371.1 probable inactive purple acid phosphatase 16 [Sesamum indicum]
Unigene0023702	6.14	12.32	11.16	1.35	1.14	2.11	2.68687	4.92964e-19	--	XP_012846969.1 PREDICTED: uncharacterized protein LOC105966941 [Erythranthe guttata]
Unigene0019886	0.23	0.24	0.16	3.42	4.06	3.98	-4.18511	5.34392e-19	At4g30520	XP_011069822.1 probable LRR receptor-like serine/threonine-protein kinase At4g30520 [Sesamum indicum]
Unigene0035073	18.09	16.67	38.94	251.18	227.91	179.71	-3.1601	5.49452e-19	10HGO	XP_019240186.1 PREDICTED: 8-hydroxygeraniol dehydrogenase-like [Nicotiana attenuata]
Unigene0020590	1.17	0.75	0.31	11.16	11.12	14.17	-4.0308	5.53023e-19	SAUR36	PIN05321.1 hypothetical protein CDL12_22131 [Handroanthus impetiginosus]
Unigene0021595	13.81	16.11	18.16	6.14	5.22	5.72	1.49313	5.56901e-19	--	XP_011083423.1 uncharacterized protein LOC105165961 [Sesamum indicum]
Unigene0031725	25.24	35.34	30.02	14.05	14.39	12.36	1.15094	5.58272e-19	CAMRLK	XP_012849094.1 PREDICTED: probable LRR receptor-like serine/threonine-protein kinase At2g24230 [Erythranthe guttata]
Unigene0036158	8.08	9.31	8.7	1.79	2.16	2.98	1.91257	5.69932e-19	PDCB1	XP_011087299.1 PLASMODESMATA CALLOSE-BINDING PROTEIN 3 [Sesamum indicum]
Unigene0024741	0.64	0.87	0.93	5.81	4.46	5.63	-2.70407	5.75079e-19	BGAL8	XP_011089316.1 beta-galactosidase 8 [Sesamum indicum]
Unigene0030613	69.16	75.56	32.12	415.2	426.94	519.63	-2.94497	5.76029e-19	DRT100	XP_011087364.1 DNA damage-repair/toleration protein DRT100 [Sesamum indicum]
Unigene0024103	13.97	15.29	11.4	5.8	5.48	5.51	1.27601	5.76029e-19	HDG1	XP_011093166.1 homeobox-leucine zipper protein ANTHOCYANINLESS 2 isoform X1 [Sesamum indicum]
Unigene0035539	182.97	128.27	276.64	1370.99	1260.01	1148.22	-2.68449	5.77772e-19	TIP1-1	GER39699.1 aquaporin 1 [Striga asiatica]
Unigene0031646	20.28	20.03	24.59	8.95	10.46	8.95	1.19436	6.24085e-19	--	XP_011072040.1 uncharacterized protein LOC105157340 [Sesamum indicum]
Unigene0033770	8.84	8.9	9.07	29.94	25.88	24.05	-1.57488	6.54558e-19	PIP5K1	PIN07198.1 Phosphatidylinositol-4-phosphate 5-kinase [Handroanthus impetiginosus]
Unigene0033847	2.55	3.73	3.85	16.59	15.24	13.75	-2.16977	6.57923e-19	At2g18193	XP_011083188.1 AAA-ATPase At2g18193-like [Sesamum indicum]
Unigene0034633	8.76	4.07	7.1	111.56	67.14	56.91	-3.56339	6.63493e-19	PSAO	XP_016441914.1 PREDICTED: photosystem I subunit O-like [Nicotiana tabacum]
Unigene0016366	17.48	23.01	21.16	9.7	9.53	8.38	1.15891	6.71611e-19	IBI1	XP_011075752.1 aspartate--tRNA ligase 2, cytoplasmic [Sesamum indicum]
Unigene0031651	257.83	185.17	173.1	0.61	2.33	0.34	7.55332	7.39345e-19	PDR1	XP_011081908.1 pleiotropic drug resistance protein 1-like isoform X2 [Sesamum indicum]
Unigene0028046	108.55	94.37	126.02	53.25	51.02	52.35	1.07056	7.63714e-19	--	XP_011100391.1 myosin-9 [Sesamum indicum]
Unigene0002536	13.19	14.86	14.81	5.82	4.83	3.69	1.57959	7.68838e-19	PLDBETA1	XP_011072042.1 phospholipase D beta 1 [Sesamum indicum]
Unigene0018264	2.08	1.54	1.62	8.02	8.36	9.46	-2.30197	7.7427e-19	GGAT1	XP_012848114.1 PREDICTED: glutamate--glyoxylate aminotransferase 2 [Erythranthe guttata]
Unigene0026818	1.85	1.17	1.55	19.68	12.16	14.22	-3.33325	7.79465e-19	BGAL1	GER53514.1 beta-galactosidase [Striga asiatica]
Unigene0023978	7.35	8.4	8.15	2.01	2.91	2.61	1.66629	8.49975e-19	RLPH2	XP_011094397.1 uncharacterized protein LOC105174104 [Sesamum indicum]
Unigene0023088	8.03	7.16	6.5	0.6	0.87	0.88	3.2063	9.51853e-19	--	PIN01484.1 hypothetical protein CDL12_26008 [Handroanthus impetiginosus]
Unigene0026487	21.17	19.43	20.44	10.86	9.45	9.28	1.04465	9.67239e-19	MSI4	PIN25126.1 Nucleosome remodeling factor, subunit CAF1/NURF55/MSI1 [Handroanthus impetiginosus]
Unigene0031691	1.01	1.15	0.32	11.05	13.57	18.31	-4.11357	9.67547e-19	DOGL2	PIN04162.1 hypothetical protein CDL12_23295 [Handroanthus impetiginosus]
Unigene0027299	113.72	122.68	104.94	254.57	266.22	281.6	-1.23309	9.92446e-19	HIPP26	XP_011088612.1 heavy metal-associated isoprenylated plant protein 26-like [Sesamum indicum]
Unigene0013754	28.97	35.97	37.66	16.25	13.36	12.64	1.28001	9.95031e-19	ERF060	XP_011090520.1 ethylene-responsive transcription factor ERF060 [Sesamum indicum]
Unigene0026838	0.27	0.08	0.17	3.83	3.97	4.06	-4.51145	1.00927e-18	--	PIN26716.1 Ubiquitin--protein ligase [Handroanthus impetiginosus]
Unigene0006048	1.28	0.94	1.1	8.89	7.3	12.06	-3.089	1.13482e-18	HCF101	XP_011078358.1 fe-S cluster assembly factor HCF101, chloroplastic [Sesamum indicum]
Unigene0019208	26.1	32.52	31.65	70.8	69.65	72.03	-1.23501	1.22728e-18	ADC1	PIN12738.1 Arginine decarboxylase [Handroanthus impetiginosus]
Unigene0025128	43.29	42.1	45.17	21.39	22.7	17.07	1.09405	1.25437e-18	PAA2	XP_011081596.1 copper-transporting ATPase PAA2, chloroplastic [Sesamum indicum]
Unigene0015248	22.71	22.56	22.16	65.5	55.16	57.38	-1.40074	1.27004e-18	--	XP_011069633.1 uncharacterized protein LOC105155456 [Sesamum indicum]
Unigene0006273	6.53	8.45	5.76	0.76	1.12	0.96	2.86845	1.28666e-18	EDR2	PIN26427.1 hypothetical protein CDL12_00808 [Handroanthus impetiginosus]
Unigene0035804	5.08	4.75	4.72	32.64	49.3	31.02	-2.95672	1.2933e-18	--	-
Unigene0002342	24.96	24.09	25.92	68.53	59.75	65.45	-1.36966	1.3347e-18	ISPF	NP_001289517.1 2-C-methyl-D-erythritol 2,4-cyclodiphosphate synthase, chloroplastic [Nicotiana sylvestris]
Unigene0003765	0	0	0.11	11.27	12.37	14.76	-8.44746	1.36874e-18	TIC32	XP_011070359.1 short-chain dehydrogenase TIC 32, chloroplastic [Sesamum indicum]
Unigene0003263	40.42	42.91	43.03	130.65	112.75	161.07	-1.67849	1.40369e-18	At1g56190	XP_011095719.1 phosphoglycerate kinase, chloroplastic [Sesamum indicum]
Unigene0030354	2.14	1.06	2.69	22.08	19.36	16.23	-3.29148	1.43814e-18	--	PIN22724.1 hypothetical protein CDL12_04541 [Handroanthus impetiginosus]
Unigene0030378	60.92	95.35	164.73	11.71	14.97	6.01	3.29565	1.54616e-18	--	PIM98316.1 hypothetical protein CDL12_29208 [Handroanthus impetiginosus]
Unigene0029533	37.14	38.81	43.24	94.46	99.33	107.83	-1.33947	1.55664e-18	RPS4	XP_011084586.1 40S ribosomal protein S4 [Sesamum indicum]
Unigene0013362	0.23	0.11	0.31	4.72	5.69	6.51	-4.70215	1.56811e-18	HIPP41	EYU42182.1 hypothetical protein MIMGU_mgv1a025985mg [Erythranthe guttata]
Unigene0026549	17.74	20.2	17.35	46.62	49.6	50.06	-1.40364	1.59264e-18	RPS27B	OMO84785.1 Ribosomal protein S27e [Corchorus olitorius]
Unigene0029473	0.29	1.21	0.44	8.75	9.35	10.11	-3.86208	1.62036e-18	--	XP_012831179.1 PREDICTED: uncharacterized protein LOC105952199 [Erythranthe guttata]
Unigene0033860	1.95	2.18	0.88	13.49	13.9	16.74	-3.13888	1.62036e-18	ALDH	Q8VXQ2.1 RecName: Full=Aldehyde dehydrogenase; AltName: Full=Cp-ALDH [Craterostigma plantagineum]
Unigene0029049	2.22	2.97	2.37	10.7	11.33	10.12	-2.08836	1.63036e-18	PUB26	XP_011088242.1 U-box domain-containing protein 26 [Sesamum indicum]
Unigene0026110	4.55	6.63	5.39	18.67	18.99	19.03	-1.77452	1.63827e-18	--	PIN03520.1 hypothetical protein CDL12_23959 [Handroanthus impetiginosus]
Unigene0015031	91.5	67.53	69.83	296.78	312.68	256.52	-1.91987	1.70689e-18	SLD2	XP_011081681.1 acyl-lipid (9-3)-desaturase [Sesamum indicum]
Unigene0036568	5.7	5.84	7.14	22.62	24.89	22.82	-1.91265	1.7113e-18	At5g06290	XP_011094222.1 2-Cys peroxiredoxin BAS1, chloroplastic [Sesamum indicum]
Unigene0007008	0.46	0.66	1.29	10.44	8.09	9.31	-3.53005	1.73192e-18	WSD1	XP_011075993.1 O-acyltransferase WSD1 [Sesamum indicum]
Unigene0011641	1.34	1.63	1.27	6.93	4.97	6.09	-2.08506	1.93421e-18	NPF8.1	PIN24886.1 H+/oligopeptide symporter [Handroanthus impetiginosus]
Unigene0026689	19.53	26.28	21.08	10.79	9.84	10.34	1.11092	1.97617e-18	--	TEY71949.1 hypothetical protein Saspl_001394 [Salvia splendens]
Unigene0035945	2.17	0.93	0.69	18.86	14.89	18.89	-3.79589	2.05221e-18	--	XP_011096272.1 uncharacterized protein LOC105175517 [Sesamum indicum]
Unigene0028409	46.24	67.44	25.75	1.39	1.75	5.09	4.0825	2.08466e-18	HIPP39	XP_012840164.1 PREDICTED: FK506-binding protein 4-like [Erythranthe guttata]
Unigene0030374	3.4	3.33	3.02	17.77	23.46	22.33	-2.70465	2.08468e-18	SAUR50	XP_030510528.1 auxin-responsive protein SAUR50-like [Cannabis sativa]
Unigene0018800	21.01	16.88	26.92	6.62	5.29	7.06	1.7725	2.1117e-18	At1g33170	XP_009596891.1 PREDICTED: probable methyltransferase PMT18 [Nicotiana tomentosiformis]
Unigene0029475	35.69	45.45	32.18	14.6	16.8	16.23	1.25046	2.20088e-18	--	TEY49708.1 hypothetical protein Saspl_028795 [Salvia splendens]
Unigene0023763	2.34	2.23	1.46	13.81	16.04	26.04	-3.21236	2.25784e-18	CLT1	EYU46190.1 hypothetical protein MIMGU_mgv1a006625mg [Erythranthe guttata]
Unigene0024679	21.89	29.18	9.72	1.37	0.89	1.97	3.8451	2.32175e-18	AUX22D	XP_011073484.1 auxin-induced protein 22B [Sesamum indicum]
Unigene0017495	8.93	11.32	9.28	25.61	27.26	30.88	-1.50391	2.39857e-18	Cwc22	XP_030526691.1 pre-mRNA-splicing factor CWC22 homolog [Rhodamnia argentea]
Unigene0012667	0.65	0.54	0.44	4.81	3.38	4.08	-2.91219	2.52614e-18	R1C-3	EYU31247.1 hypothetical protein MIMGU_mgv1a017756mg [Erythranthe guttata]
Unigene0010368	12.36	10.8	9.16	3.4	3.89	3.51	1.5814	2.57386e-18	CHUP1	XP_022885085.1 protein CHUP1, chloroplastic isoform X2 [Olea europaea var. sylvestris] [Olea europaea]
Unigene0000862	0.5	0.28	0.46	4.51	3.07	4.83	-3.32309	2.69707e-18	RGI3	XP_011101301.1 probable LRR receptor-like serine/threonine-protein kinase At4g26540 [Sesamum indicum]
Unigene0032979	0.64	0.69	1.59	15.67	10.8	13.11	-3.76073	2.8422e-18	--	PIN06313.1 hypothetical protein CDL12_21140 [Handroanthus impetiginosus]
Unigene0025292	2.06	2.46	2.72	10.08	10.49	10.95	-2.12221	2.84469e-18	MFSD14A	XP_011088646.1 hippocampus abundant transcript 1 protein-like isoform X1 [Sesamum indicum]
Unigene0036049	52.17	53.58	85.01	19.24	15.46	19.98	1.80267	3.01409e-18	--	PIN04001.1 hypothetical protein CDL12_23468 [Handroanthus impetiginosus]
Unigene0004765	21.62	9.94	13.84	0.94	2.14	1.18	3.41377	3.05662e-18	--	PIN04097.1 putative hydrolase/acyltransferase (alpha/beta hydrolase superfamily) [Handroanthus impetiginosus]
Unigene0000064	12.89	17.57	14.72	3.84	4.74	6.08	1.6238	3.11023e-18	--	XP_011098836.1 uncharacterized protein LOC105177396 [Sesamum indicum]
Unigene0029301	17.19	24.9	28.89	6.22	7.05	7.28	1.78827	3.13804e-18	PPCK2	XP_012858799.1 PREDICTED: phosphoenolpyruvate carboxylase kinase 1-like [Erythranthe guttata]
Unigene0031858	4.92	5.04	7.57	26.57	23.79	26.36	-2.12978	3.19725e-18	--	XP_011075327.1 uncharacterized protein LOC105159824 [Sesamum indicum]
Unigene0014965	436.01	572.26	417.63	220.92	209.28	245.12	1.07823	3.27506e-18	--	PIN01354.1 hypothetical protein CDL12_26136 [Handroanthus impetiginosus]
Unigene0025203	18.85	12.08	9.52	2.51	2.72	1.97	2.49007	3.33096e-18	RFS2	XP_020549611.1 probable galactinol--sucrose galactosyltransferase 2 isoform X1 [Sesamum indicum]
Unigene0025704	170.17	242.22	162.23	69.9	68.31	83.17	1.37608	3.55732e-18	PIP2-4	XP_019184775.1 PREDICTED: aquaporin PIP2-4-like [Ipomoea nil]
Unigene0023816	1.21	0.57	0.28	13.13	12.65	21.25	-4.51287	3.72104e-18	AUX22D	XP_011082600.1 auxin-induced protein 22D-like [Sesamum indicum]
Unigene0031782	2.98	3.15	3.63	11.04	10.49	11.31	-1.7505	3.73671e-18	GYRB	XP_011075434.1 DNA gyrase subunit B, chloroplastic/mitochondrial isoform X1 [Sesamum indicum]
Unigene0036381	22.33	26.92	28.2	11.88	9.85	11.91	1.20309	3.76007e-18	WRKY11	XP_011082056.1 probable WRKY transcription factor 17 [Sesamum indicum]
Unigene0026899	0.09	0.17	0.49	7.87	4.39	6.68	-4.6584	4.00663e-18	MEBL	XP_020549148.1 membrane protein of ER body-like protein [Sesamum indicum]
Unigene0034948	1.04	1.41	1.53	7.73	7.53	9.22	-2.62076	4.06758e-18	DTX16	XP_012834054.1 PREDICTED: MATE efflux family protein 6-like [Erythranthe guttata]
Unigene0034079	8.91	7.36	12.66	0.07	0.57	0.32	4.91339	4.14294e-18	--	XP_002313920.1 uncharacterized protein LOC7478753 [Populus trichocarpa]
Unigene0031555	0.18	0	0	21.38	12.61	19.49	-8.21486	4.57241e-18	XTH8	GER52973.1 xyloglucan endotransglucosylase/hydrolase 8 [Striga asiatica]
Unigene0020430	19.36	11.84	14.31	0.11	0.98	0.72	4.65212	4.57871e-18	--	XP_023728647.1 uncharacterized protein LOC111876340 [Lactuca sativa]
Unigene0033200	17.69	18.65	20.64	78.69	56.74	85.54	-1.95532	4.61359e-18	HIPP07	GER44028.1 heavy metal transport/detoxification superfamily protein [Striga asiatica]
Unigene0033527	2.1	2.01	3.34	18.14	17.11	12.95	-2.69372	4.66158e-18	CP29B	XP_011077346.1 29 kDa ribonucleoprotein A, chloroplastic-like [Sesamum indicum]
Unigene0031210	2.54	2.22	2.74	0.54	0.43	0.34	2.51732	4.96773e-18	TERT	XP_011087624.1 telomerase reverse transcriptase isoform X3 [Sesamum indicum]
Unigene0027028	13.9	9.61	9.61	1.98	1.48	0.99	2.89583	5.13729e-18	--	XP_022874303.1 S-norcoclaurine synthase 2-like [Olea europaea var. sylvestris] [Olea europaea]
Unigene0035890	1.22	0.95	1.3	6.95	6.34	6.58	-2.51758	5.14988e-18	PMR6	XP_020553774.1 probable pectate lyase 12 isoform X2 [Sesamum indicum]
Unigene0007142	55.77	51.01	69.08	25.64	24.03	28.38	1.17196	5.23517e-18	SRF6	GER53645.1 protein STRUBBELIG-RECEPTOR FAMILY [Striga asiatica]
Unigene0028602	14.09	15.01	17.36	6.73	6	7.21	1.22032	5.58042e-18	AIRP2	KAF3644652.1 putative tetraspanin-19-like [Capsicum annuum]
Unigene0035406	29.11	26.17	13.01	146.7	167.56	199.93	-2.91256	5.79923e-18	--	XP_022880449.1 uncharacterized protein LOC111397683 [Olea europaea var. sylvestris] [Olea europaea]
Unigene0029610	18.22	21.06	18.42	6.19	6.89	9.01	1.38518	5.80712e-18	--	XP_020551042.1 uncharacterized protein LOC105160920 [Sesamum indicum]
Unigene0022098	3.47	5.85	5.15	1.03	0.9	0.82	2.39556	5.87974e-18	LECRKS5	PIN12566.1 Serine/threonine protein kinase [Handroanthus impetiginosus]
Unigene0005083	16.77	20.63	17.64	6.01	7.76	7.42	1.3771	6.0811e-18	FBA6	XP_011094409.1 fructose-bisphosphate aldolase 6, cytosolic [Sesamum indicum]
Unigene0026024	39.65	41.13	34.35	17.18	16.86	18.5	1.13178	6.14177e-18	GSDA	XP_022876570.1 uncharacterized protein LOC111394803 [Olea europaea var. sylvestris] [Olea europaea]
Unigene0003549	1.89	3.48	2.83	18.12	15.56	25.15	-2.84286	6.27165e-18	IAA13	PIN15648.1 hypothetical protein CDL12_11702 [Handroanthus impetiginosus]
Unigene0001973	3.51	3.98	3.55	13.93	12.34	10.97	-1.75411	6.76647e-18	PICBP	PIN20082.1 Calcium/calmodulin-dependent protein kinase [Handroanthus impetiginosus]
Unigene0028882	143.1	175.98	129.38	59.43	62.33	76.88	1.17482	6.9315e-18	HIPP01	GER54294.1 heavy metal transport/detoxification superfamily protein [Striga asiatica]
Unigene0015613	14.35	19.16	19.32	7.47	5.95	7.3	1.35033	6.98935e-18	ROPGEF14	XP_011082167.1 rop guanine nucleotide exchange factor 14 [Sesamum indicum]
Unigene0025254	55.24	47.04	62.96	198.85	174.89	164.79	-1.70446	7.17205e-18	CTL1	XP_007022927.2 PREDICTED: chitinase-like protein 1 [Theobroma cacao]
Unigene0028979	9.99	9.64	11.41	3.82	2.93	3	1.67065	7.30394e-18	AAP7	XP_011097704.1 probable amino acid permease 7 isoform X1 [Sesamum indicum]
Unigene0014445	31.77	35.53	54.25	11.74	11.8	13.81	1.70237	7.33092e-18	PII-2	XP_020547146.1 piriformospora indica-insensitive protein 2-like [Sesamum indicum]
Unigene0005767	0.5	0.82	0.7	8.23	6.28	9.5	-3.57121	7.33146e-18	--	XP_011097719.1 uncharacterized protein LOC105176567 [Sesamum indicum]
Unigene0029893	21.51	32.27	15.13	123.32	118.33	142.45	-2.4787	7.4326e-18	--	XP_011089452.1 uncharacterized protein LOC105170399 [Sesamum indicum]
Unigene0023269	13.4	11.88	10.69	4.79	5.18	4.65	1.29885	7.83401e-18	At4g27290	PIN16323.1 Serine/threonine protein kinase [Handroanthus impetiginosus]
Unigene0026431	0	0	0	15.73	12.15	13.9	-13.7656	7.84025e-18	MYB61	XP_011071911.1 transcription factor MYB86 [Sesamum indicum]
Unigene0031722	1.21	1.71	1.61	7.9	7.63	6.87	-2.30592	8.23174e-18	GATL7	TEY88014.1 hypothetical protein Saspl_012390 [Salvia splendens]
Unigene0002841	3.47	4.81	3.67	14.39	14.37	18.35	-1.97902	8.42945e-18	SPPA	TEY46648.1 protease IV [Salvia splendens]
Unigene0022071	4.6	5.02	5.31	12.25	12.56	12.09	-1.30541	8.5001e-18	DTX53	XP_020550994.1 protein DETOXIFICATION 53-like isoform X1 [Sesamum indicum]
Unigene0030625	44.8	45.45	46.87	21.64	19.06	25.54	1.04966	8.5001e-18	NFYB1	AGG09672.1 transcription factor NFYB [Salvia miltiorrhiza]
Unigene0026010	37.99	42.51	47.72	20.1	23.15	19.69	1.02657	8.61853e-18	LWD1	XP_007161787.1 hypothetical protein PHAVU_001G098000g [Phaseolus vulgaris]
Unigene0000616	39.1	37.81	31.65	18.19	17.99	17.01	1.02927	8.69989e-18	AAE17	XP_022885617.1 probable acyl-activating enzyme 17, peroxisomal [Olea europaea var. sylvestris] [Olea europaea]
Unigene0007536	2.3	1.39	1.68	28.68	19.53	19.54	-3.65723	8.69989e-18	LON1	PWZ41506.1 Lon protease 2, peroxisomal [Zea mays]
Unigene0001975	21.65	17.35	44.49	3.05	4.46	2.76	3.02317	8.88143e-18	CYP81Q32	XP_022843744.1 cytochrome P450 81E8-like [Olea europaea var. sylvestris] [Olea europaea]
Unigene0035010	0.96	1.17	0.88	17.35	10.09	17.52	-3.90081	9.2006e-18	At4g29360	XP_011095937.1 glucan endo-1,3-beta-glucosidase 4 isoform X1 [Sesamum indicum]
Unigene0024576	46.7	54.79	36.04	150.25	157.54	157.87	-1.75953	9.32981e-18	PYL2	XP_011081692.1 abscisic acid receptor PYL2 [Sesamum indicum]
Unigene0030441	2.56	2.89	1.97	13.65	11.1	10.01	-2.22794	9.49227e-18	--	XP_011073687.1 protein ENHANCED DISEASE RESISTANCE 4 [Sesamum indicum]
Unigene0006461	28.24	20.38	26.99	9.67	10.31	8.54	1.4066	1.00221e-17	FAR2	XP_011078802.1 fatty acyl-CoA reductase 2 [Sesamum indicum]
Unigene0022874	20.25	41.32	37.17	6.84	8.56	5.75	2.22298	1.04425e-17	CYP71B34	PIN13702.1 Cytochrome P450 CYP2 subfamily [Handroanthus impetiginosus]
Unigene0006335	8.52	12.18	14.77	1.99	3.11	2.15	2.29055	1.06906e-17	GGCT2;2	XP_011082091.1 gamma-glutamylcyclotransferase 2-1-like [Sesamum indicum]
Unigene0001643	0	0.26	0	14.28	21.21	22.39	-7.79841	1.09167e-17	--	XP_019073888.1 PREDICTED: uncharacterized protein LOC100242640 isoform X1 [Vitis vinifera]
Unigene0030948	3.3	3.59	3.56	13.57	14.3	20.56	-2.2124	1.09167e-17	SCPL40	XP_011091773.1 serine carboxypeptidase-like 40 [Sesamum indicum]
Unigene0004803	0.72	1.08	0.82	3.72	3.77	4.31	-2.17115	1.09308e-17	TSS	XP_011093807.1 protein TSS [Sesamum indicum]
Unigene0030037	15.32	18.26	14.48	6.57	7.3	7.67	1.15782	1.10647e-17	HSK	XP_022852570.1 homoserine kinase [Olea europaea var. sylvestris] [Olea europaea]
Unigene0019396	9.98	11.91	20.75	2.13	2.51	1.43	2.81244	1.17961e-17	5MAT1	XP_012852493.1 PREDICTED: malonyl-coenzyme:anthocyanin 5-O-glucoside-6'''-O-malonyltransferase-like [Erythranthe guttata]
Unigene0010712	39.72	46.28	43.03	21.36	18.3	16.35	1.20395	1.28577e-17	--	RAL44006.1 hypothetical protein DM860_014143 [Cuscuta australis]
Unigene0036104	8.16	10.59	11.83	3.97	3.47	3.79	1.44523	1.328e-17	--	XP_011090943.1 uncharacterized protein LOC105171501 [Sesamum indicum]
Unigene0036558	2.89	2.95	2.25	16.62	16	12.96	-2.49419	1.33655e-17	FKBP17-2	XP_011084353.1 peptidyl-prolyl cis-trans isomerase FKBP17-2, chloroplastic [Sesamum indicum]
Unigene0030084	2.06	3.19	3.94	0.07	0.03	0.05	5.93703	1.41197e-17	POT6	XP_011086541.1 potassium transporter 6 isoform X1 [Sesamum indicum]
Unigene0015873	2.49	3.87	3.91	15.22	13.76	18.09	-2.19637	1.49304e-17	BHLH62	XP_022878848.1 transcription factor bHLH78-like [Olea europaea var. sylvestris] [Olea europaea]
Unigene0002466	14.77	16.34	17.37	6.5	6.03	4.51	1.50846	1.52448e-17	--	XP_011084973.1 uncharacterized protein LOC105167097 [Sesamum indicum]
Unigene0035673	5.46	7.66	5.08	22.71	20.47	24.07	-1.8856	1.56249e-17	At3g50780	XP_011085536.1 BTB/POZ domain-containing protein At3g50780-like [Sesamum indicum]
Unigene0004548	2.98	3.56	2.57	0.45	0.64	0.36	2.6514	1.56675e-17	--	-
Unigene0001500	18.09	18.98	25.84	65.68	67.31	67.11	-1.66936	1.56934e-17	EDR2	XP_011092599.1 protein ENHANCED DISEASE RESISTANCE 2 isoform X1 [Sesamum indicum]
Unigene0029587	0.2	0.06	0.04	6.94	6.25	6.65	-6.04731	1.6653e-17	--	XP_011095368.1 uncharacterized protein LOC105174845 isoform X2 [Sesamum indicum]
Unigene0015156	12.41	10.51	10.75	4.17	4.22	4.86	1.34547	1.69656e-17	--	XP_011076684.1 mucin-5AC isoform X2 [Sesamum indicum]
Unigene0030817	0.67	0.55	0.26	9.09	5.3	6.7	-3.83289	1.75145e-17	JKD	XP_011094681.1 protein indeterminate-domain 9 [Sesamum indicum]
Unigene0033125	603.1	500.86	530.83	260.4	242.58	296.49	1.03199	1.83706e-17	--	GER55056.1 hypothetical protein STAS_32691 [Striga asiatica]
Unigene0014189	9.84	11.25	11.43	28.03	24.95	28.85	-1.3313	1.91954e-17	lacZ	XP_011088633.1 uncharacterized protein LOC105169806 [Sesamum indicum]
Unigene0034996	11.64	13.31	21.02	4.05	2.77	3.1	2.21228	2.06582e-17	UGT73C3	XP_012847288.1 PREDICTED: scopoletin glucosyltransferase-like [Erythranthe guttata]
Unigene0021347	1.12	3.04	0.36	33.5	34.46	36.95	-4.53669	2.06941e-17	AUX22	TEY27223.1 auxin-responsive protein IAA [Salvia splendens]
Unigene0026702	5.22	5.34	12.69	71.41	64.18	62.46	-3.09056	2.14718e-17	At3g48460	XP_012833865.1 PREDICTED: GDSL esterase/lipase At3g48460-like [Erythranthe guttata]
Unigene0034399	6.64	10.24	7.47	37.78	33.47	37.28	-2.1561	2.19878e-17	--	KZV14917.1 hypothetical protein F511_40309 [Dorcoceras hygrometricum]
Unigene0028902	1.3	1.79	1.38	7.73	8.77	10.38	-2.58819	2.20467e-17	BHLH68	KZV58189.1 Basic helix-loop-helix DNA-binding superfamily protein isoform 1 [Dorcoceras hygrometricum]
Unigene0034132	38.31	45.17	39.66	11.37	11.3	17.29	1.62367	2.31314e-17	--	PIN12057.1 hypothetical protein CDL12_15346 [Handroanthus impetiginosus]
Unigene0028269	0.21	0.19	0.09	5.05	6.63	6.71	-5.23	2.33347e-17	CXE17	XP_022882014.1 probable carboxylesterase 17 [Olea europaea var. sylvestris] [Olea europaea]
Unigene0034082	2.85	2.59	2.71	0.22	0.22	0.09	3.94274	2.3663e-17	EMB8	XP_011097230.1 embryogenesis-associated protein EMB8 [Sesamum indicum]
Unigene0001730	12.05	12.7	13.5	34.86	38.03	36.92	-1.52148	2.37096e-17	RPS9C	XP_022871821.1 40S ribosomal protein S9-2-like [Olea europaea var. sylvestris] [Olea europaea]
Unigene0034207	15.36	16.01	11.01	0.94	2.44	2.36	2.88426	2.5537e-17	--	PIN07836.1 hypothetical protein CDL12_19593 [Handroanthus impetiginosus]
Unigene0023760	2.12	2.36	0.94	14.9	15.27	19.22	-3.18785	2.5537e-17	NAC92	XP_011085744.1 NAC domain-containing protein 100 [Sesamum indicum]
Unigene0026184	44.53	65.86	86.39	15.51	17.37	20.52	1.88167	2.63848e-17	SRP	PIM98204.1 hypothetical protein CDL12_29318 [Handroanthus impetiginosus]
Unigene0034308	2.78	2.04	8.02	311.71	322.19	206.65	-6.03262	2.65942e-17	MTARC1	XP_011085146.1 mitochondrial amidoxime reducing component 2 [Sesamum indicum]
Unigene0030827	4.61	6.64	4.41	0.38	0.12	0.42	4.08931	2.84781e-17	DDS	PWA71024.1 OSC2 [Artemisia annua]
Unigene0007304	4.23	4.16	5.45	0.9	0.93	0.79	2.40121	2.93101e-17	HMGCL	XP_011080451.1 hydroxymethylglutaryl-CoA lyase, mitochondrial [Sesamum indicum]
Unigene0020610	7.54	12.33	21.94	0.08	0.31	0.18	6.19674	3.3013e-17	--	-
Unigene0032948	21.07	14.96	17.59	4.95	6.47	4.37	1.76376	3.35774e-17	PAB7	PIN11134.1 Polyadenylate-binding protein (RRM superfamily) [Handroanthus impetiginosus]
Unigene0008868	8.45	9.47	5.66	0.29	0.46	0.56	4.16993	3.63562e-17	--	-
Unigene0010893	27.43	49.43	24.34	7.43	8.82	8.61	2.02531	3.87566e-17	At1g54610	XP_011100191.1 probable serine/threonine-protein kinase At1g54610 [Sesamum indicum]
Unigene0027455	21.41	40.69	17.63	3.42	1.55	3.23	3.28143	3.96064e-17	CEP14	XP_024993252.1 precursor of CEP14-like [Cynara cardunculus var. scolymus] [Cynara cardunculus]
Unigene0027997	4.38	5.4	3.95	1.3	1.34	1.49	1.73312	3.994e-17	--	PIN18249.1 hypothetical protein CDL12_09077 [Handroanthus impetiginosus]
Unigene0025144	12.89	15.25	14.08	6.01	6.36	7.42	1.09315	4.01553e-17	URH2	XP_011074011.1 probable uridine nucleosidase 2 isoform X1 [Sesamum indicum]
Unigene0020071	3.55	1.4	2.88	29.34	37.25	19.9	-3.46545	4.02597e-17	COL5	XP_011069877.1 zinc finger protein CONSTANS-LIKE 5-like [Sesamum indicum]
Unigene0006693	0.7	1.69	0.66	11.4	18.08	10.36	-3.70734	4.09525e-17	--	PIN19021.1 hypothetical protein CDL12_08306 [Handroanthus impetiginosus]
Unigene0008801	2.18	2.29	2.67	17.52	27.03	23.38	-3.25005	4.09525e-17	--	-
Unigene0019102	9.34	13.05	11.94	5.01	5.38	4.99	1.15841	4.21672e-17	FOLD4	PIN06185.1 Methylenetetrahydrofolate dehydrogenase/methylenetetrahydrofolate cyclohydrolase [Handroanthus impetiginosus]
Unigene0001012	0.93	1.13	1.7	8.57	6.93	7.82	-2.63276	4.27691e-17	--	XP_011076151.1 uncharacterized protein LOC105160466 [Sesamum indicum]
Unigene0008384	2.36	2.37	3.99	13.94	14.69	15.81	-2.34946	4.50408e-17	MT0715	EXC34955.1 3-oxoacyl-[acyl-carrier-protein] reductase FabG [Morus notabilis]
Unigene0009951	5.88	5.43	4.77	0.12	0.43	0	4.86969	4.51269e-17	--	-
Unigene0005730	42.54	42.79	51.53	18.55	18.58	24.35	1.15451	4.65629e-17	NIA	XP_011097626.1 nitrate reductase [NADH] 2 [Sesamum indicum]
Unigene0031600	0.47	0.38	1.77	20.16	19.03	15.48	-4.38311	4.8012e-17	PMEI10	XP_011081197.1 pectinesterase inhibitor 10-like [Sesamum indicum]
Unigene0024379	0.68	0.72	0.77	4.36	5.47	4.51	-2.72428	4.81918e-17	PCMP-H59	PIN07104.1 hypothetical protein CDL12_20332 [Handroanthus impetiginosus]
Unigene0007124	0.52	0.66	1.21	6.55	6.16	7.95	-3.11176	5.0512e-17	LIP	XP_011091375.1 uncharacterized protein LOC105171832 isoform X2 [Sesamum indicum]
Unigene0035414	1.77	1.41	1.79	9.02	10.53	8.53	-2.49823	5.07541e-17	--	XP_011074382.1 uncharacterized protein LOC105159125 isoform X2 [Sesamum indicum]
Unigene0034820	45.39	43.55	54.34	23.93	21.11	18.51	1.17287	5.26698e-17	PPC1	GER29163.1 phosphoenolpyruvate carboxylase [Striga asiatica]
Unigene0035639	0.29	0.52	0.42	7.75	7.23	12.07	-4.4589	6.13756e-17	SGRL	XP_011074802.1 protein STAY-GREEN LIKE, chloroplastic [Sesamum indicum]
Unigene0033427	0.2	0.37	0.26	6.29	3.31	5.31	-4.16703	6.30662e-17	NPF3.1	XP_011070210.2 protein NRT1/ PTR FAMILY 3.1-like isoform X1 [Sesamum indicum]
Unigene0024638	0	0	0	19.46	17.82	24.85	-14.338	6.3344e-17	DOF3.1	XP_011087020.2 dof zinc finger protein DOF5.8-like [Sesamum indicum]
Unigene0000973	3.69	3.56	3.32	18.61	17.32	23.41	-2.48903	6.47045e-17	CURT1B	KAA8520800.1 hypothetical protein F0562_014928 [Nyssa sinensis]
Unigene0007665	21.64	13.82	17.58	92.33	93.7	67.49	-2.25695	6.91124e-17	CYP71A6	PIN13549.1 Cytochrome P450 CYP2 subfamily [Handroanthus impetiginosus]
Unigene0022142	11.32	7.65	10.37	1.65	1.41	2.25	2.46609	6.91124e-17	--	PIN22538.1 hypothetical protein CDL12_04731 [Handroanthus impetiginosus]
Unigene0025264	10.21	9.37	15.14	3.46	3.51	3.52	1.72675	7.04089e-17	--	XP_011073715.1 uncharacterized protein LOC105158603 isoform X2 [Sesamum indicum]
Unigene0010710	3.51	10.52	23.49	0.29	0.16	0.28	5.68362	7.07837e-17	OPR1	PIN11430.1 NADH:flavin oxidoreductase/12-oxophytodienoate reductase [Handroanthus impetiginosus]
Unigene0028090	35.44	38.23	39.63	90.97	86.29	105.5	-1.31943	7.11201e-17	At5g16450	XP_012858753.1 PREDICTED: putative 4-hydroxy-4-methyl-2-oxoglutarate aldolase 2 [Erythranthe guttata]
Unigene0036277	7.99	11.56	14.44	48.43	52.76	54.33	-2.19392	7.27028e-17	THS1	GER28854.1 polyketide cyclase/dehydrase and lipid transportsuperfamily protein [Striga asiatica]
Unigene0030901	5.27	6.35	3.29	23.77	25.13	27.05	-2.34877	7.58938e-17	CCX1	XP_011069968.1 cation/calcium exchanger 1 [Sesamum indicum]
Unigene0026331	1.31	1.23	1.54	8.38	8.82	9.74	-2.72311	8.00952e-17	--	XP_006345411.1 PREDICTED: uncharacterized protein LOC102606402 [Solanum tuberosum]
Unigene0000553	49.69	39.36	54.14	15.74	9.68	11.53	1.95428	8.51264e-17	--	-
Unigene0021324	0	0	0	22.13	17.63	9.23	-13.9952	8.59999e-17	5MAT1	XP_011076802.1 anthocyanidin 3-O-glucoside 6''-O-acyltransferase [Sesamum indicum]
Unigene0035564	0.44	0.63	0.12	10.33	12.04	7.46	-4.64773	8.95043e-17	ATHB-40	PIM99402.1 Transcription factor HEX [Handroanthus impetiginosus]
Unigene0018148	0.49	0.84	0.99	10.66	13.19	10.11	-3.87164	9.57266e-17	JAL19	XP_012835090.1 PREDICTED: jacalin-related lectin 19 [Erythranthe guttata]
Unigene0031492	47.56	48.84	49.54	20.57	27.86	21.39	1.06366	9.64873e-17	RNP1	KZV36205.1 heterogeneous nuclear ribonucleoprotein 1-like [Dorcoceras hygrometricum]
Unigene0012051	2.82	4.01	2.66	12.96	10.89	10.94	-1.87419	9.97199e-17	ZOX1	XP_012828041.1 PREDICTED: zeatin O-glucosyltransferase-like [Erythranthe guttata]
Unigene0035350	64.38	70.02	38.5	14.99	16	17.76	1.82646	1.02972e-16	CXE20	PIN04531.1 Arylacetamide deacetylase [Handroanthus impetiginosus]
Unigene0034415	30	30.44	30.28	81.24	70.18	70.1	-1.28794	1.05685e-16	--	XP_011098542.1 uncharacterized protein LOC105177187 [Sesamum indicum]
Unigene0016405	465.6	643.59	777.72	222.28	189.39	258.15	1.49418	1.06539e-16	CYS5	XP_031104481.1 cysteine proteinase inhibitor 1-like [Ipomoea triloba]
Unigene0016914	113.84	130.71	107.3	50.51	53.43	67.5	1.03726	1.06619e-16	CYCL	XP_012852767.1 PREDICTED: cytochrome c1-2, heme protein, mitochondrial-like isoform X2 [Erythranthe guttata]
Unigene0002309	23.17	28.53	21.43	8.09	10.81	8.96	1.39227	1.16892e-16	--	XP_011084503.1 rust resistance kinase Lr10-like [Sesamum indicum]
Unigene0018633	0.32	0.53	0.18	15.04	14.28	9.72	-5.24424	1.18814e-16	--	XP_022897380.1 uncharacterized protein LOC111411038 [Olea europaea var. sylvestris] [Olea europaea]
Unigene0008730	2.89	3.4	5.94	0.29	0.25	0.25	3.95243	1.26352e-16	GRF8	XP_011070391.1 growth-regulating factor 8 isoform X1 [Sesamum indicum]
Unigene0016414	7.04	17.01	11.55	62.41	73.15	83.56	-2.62177	1.28247e-16	--	KZV54814.1 hypothetical protein F511_40496 [Dorcoceras hygrometricum]
Unigene0035064	243.4	248.46	274.8	528.15	571.16	584.34	-1.13493	1.29901e-16	RPS7	XP_011099551.1 40S ribosomal protein S7 [Sesamum indicum]
Unigene0027913	26.61	27.24	30.2	79.12	72.01	65.02	-1.36271	1.39302e-16	VLN2	CDP14114.1 unnamed protein product [Coffea canephora]
Unigene0004867	17.58	19.35	19.6	39.88	42.16	43.38	-1.14968	1.39755e-16	CRCK3	PIN02695.1 Serine/threonine protein kinase [Handroanthus impetiginosus]
Unigene0024102	32.55	33.73	53.72	11.62	11.06	14.08	1.70683	1.4298e-16	TMN3	XP_011099917.1 transmembrane 9 superfamily member 3 [Sesamum indicum]
Unigene0030810	0.55	0.22	0.31	9.63	8.57	12.46	-4.82725	1.42989e-16	petM	XP_011088318.1 uncharacterized protein LOC105169591 [Sesamum indicum]
Unigene0022984	30.61	35.65	22.61	11.61	11.48	11.66	1.35468	1.43186e-16	--	XP_020548279.1 uncharacterized protein LOC105158927 isoform X2 [Sesamum indicum]
Unigene0027820	16.05	16.29	16.87	46.06	43.26	37.53	-1.3661	1.45529e-16	--	XP_011087737.1 importin-4 isoform X1 [Sesamum indicum]
Unigene0035162	4.86	6.04	4.64	16.66	15.08	16.28	-1.62765	1.54394e-16	PUB30	PIN22703.1 Ubiquitin--protein ligase [Handroanthus impetiginosus]
Unigene0034344	7.15	7.08	8.71	26.26	23.85	30.68	-1.81631	1.54727e-16	PSP	PIN11720.1 Phosphoserine phosphatase [Handroanthus impetiginosus]
Unigene0024204	1.49	1.54	1.75	9.79	6.82	10.83	-2.5212	1.56553e-16	GAPA1	TEY56721.1 glyceraldehyde-3-phosphate dehydrogenase (NADP+) (phosphorylating) [Salvia splendens]
Unigene0026363	11.93	26.72	14.19	2.81	1.4	2.7	2.93487	1.59886e-16	MES11	KZV22429.1 methylesterase 11, chloroplastic [Dorcoceras hygrometricum]
Unigene0003987	45.96	48.16	42.91	106.78	129.56	114.35	-1.3557	1.63615e-16	--	XP_011086417.1 uncharacterized protein LOC105168160 [Sesamum indicum]
Unigene0008226	2.9	0.85	2.01	18.54	22.63	24.59	-3.51307	1.66503e-16	--	-
Unigene0016572	27.74	35.19	29.03	94.21	100.9	78.73	-1.57425	1.70429e-16	PURA1	XP_020552415.1 transcription factor Pur-alpha 1 isoform X1 [Sesamum indicum]
Unigene0031682	1.15	2.31	1.54	11.14	9.78	11.91	-2.71501	1.82079e-16	NDR1	XP_011095334.1 protein NDR1-like [Sesamum indicum]
Unigene0001339	2.97	2.51	4.51	0.31	0.37	0.34	3.29192	1.8231e-16	--	PIN15105.1 hypothetical protein CDL12_12255 [Handroanthus impetiginosus]
Unigene0003244	16.96	12.72	17.98	3.91	3.64	5.63	1.85443	1.84211e-16	At4g13710	XP_011091390.2 probable pectate lyase 8 [Sesamum indicum]
Unigene0022255	8.02	12.98	6.47	0.67	0.94	1.32	3.22888	1.92463e-16	At1g08170	XP_012838320.1 PREDICTED: probable histone H2B.3 [Erythranthe guttata]
Unigene0029150	9.63	10.17	6.89	30.19	31.92	30.85	-1.80031	2.01846e-16	ASD1	XP_011079239.1 alpha-L-arabinofuranosidase 1 isoform X1 [Sesamum indicum]
Unigene0018179	4.26	2.93	4.35	0.63	0.41	0.32	3.08496	2.0458e-16	FH5	XP_011095788.1 formin-like protein 5 isoform X1 [Sesamum indicum]
Unigene0019979	0.22	0.13	0.37	4.37	3.95	3.79	-4.07206	2.05309e-16	--	PIN04738.1 hypothetical protein CDL12_22725 [Handroanthus impetiginosus]
Unigene0004696	74.55	130.33	327.25	4.59	5.65	3.35	5.29116	2.12678e-16	--	-
Unigene0033857	24.17	20.76	24.66	65.63	64.86	58.93	-1.44464	2.15629e-16	IMPA1	TEY91751.1 hypothetical protein Saspl_013693 [Salvia splendens]
Unigene0005486	1.23	0.75	0.39	8.83	9.22	8.58	-3.49009	2.29422e-16	--	-
Unigene0026030	37.48	28.92	32.47	12.33	14.08	9.82	1.44835	2.31661e-16	CRTL-E-1	XP_011078026.1 lycopene epsilon cyclase, chloroplastic [Sesamum indicum]
Unigene0000632	14.65	26.61	16.49	3.67	3.36	4.09	2.37666	2.39105e-16	RLK7	XP_011074301.1 receptor-like protein kinase HAIKU2 [Sesamum indicum]
Unigene0002108	6.94	6.35	7.28	19.83	21.4	20.17	-1.5777	2.39113e-16	CYP98A2	XP_011091866.1 cytochrome P450 98A2 [Sesamum indicum]
Unigene0013958	29.04	33.83	25.14	79.34	82.94	100.33	-1.57718	2.58761e-16	FAB1C	XP_011075701.1 putative 1-phosphatidylinositol-3-phosphate 5-kinase FAB1C isoform X1 [Sesamum indicum]
Unigene0033720	36.86	47.93	31.28	122	125.49	150.96	-1.7794	2.6045e-16	OsI_021818	PIN09741.1 putative serine/threonine protein kinase [Handroanthus impetiginosus]
Unigene0018990	24	35.47	24.08	87.06	92	107.59	-1.77858	2.68241e-16	SCL15	PIM97354.1 hypothetical protein CDL12_30176 [Handroanthus impetiginosus]
Unigene0031814	319.59	473.64	150.29	0.93	5.66	3.69	6.52014	2.70075e-16	D14	XP_011084099.1 strigolactone esterase D14 [Sesamum indicum]
Unigene0033748	22.92	18.77	28.37	7.84	8.71	7.54	1.54016	2.83421e-16	SMO2-2	XP_011089797.1 methylsterol monooxygenase 2-2 [Sesamum indicum]
Unigene0024508	8.61	7.12	9.37	3.15	3.51	3.01	1.3761	2.87161e-16	SEU	XP_011081029.1 probable transcriptional regulator SLK3 isoform X1 [Sesamum indicum]
Unigene0003243	0.41	0.75	0.43	4.12	6.53	5.61	-3.35423	2.88833e-16	--	PIN01460.1 hypothetical protein CDL12_26029 [Handroanthus impetiginosus]
Unigene0028416	10.98	10.47	9.26	0	0.31	0.09	6.26256	2.91545e-16	--	XP_012830294.1 PREDICTED: uncharacterized protein LOC105951414 [Erythranthe guttata]
Unigene0031301	36.77	27.05	41.37	9.9	10.68	6.13	1.97755	2.94063e-16	NPF5.2	XP_012842880.1 PREDICTED: protein NRT1/ PTR FAMILY 5.2-like [Erythranthe guttata]
Unigene0034213	15.19	18.52	17.33	39.8	42.26	47.57	-1.3447	3.06827e-16	At3g27390	XP_011099151.1 uncharacterized membrane protein At3g27390 [Sesamum indicum]
Unigene0028404	10.72	10.55	7.23	0.12	0.84	0.85	3.9769	3.10734e-16	--	XP_023759942.1 uncharacterized protein LOC111908349 [Lactuca sativa]
Unigene0027491	0.23	0.31	0.41	3.07	3.12	2.91	-3.25987	3.27499e-16	NRG2	XP_011077703.1 uncharacterized protein LOC105161647 [Sesamum indicum]
Unigene0024476	14.79	13.53	17.83	47.67	47.75	42.52	-1.57964	3.33825e-16	--	XP_011100554.1 uncharacterized protein LOC105178721 [Sesamum indicum]
Unigene0036523	217.09	210.89	158.03	81.42	93.99	90.57	1.13961	3.41283e-16	At4g31140	PIN15329.1 Glucan endo-1,3-beta-D-glucosidase [Handroanthus impetiginosus]
Unigene0016746	7.44	7.65	6.68	2.55	1.96	2.99	1.53738	3.45134e-16	R1A-10	XP_011072173.1 putative late blight resistance protein homolog R1A-10 [Sesamum indicum]
Unigene0005428	68.25	127.76	81.78	31.1	31.2	30.91	1.57544	3.53216e-16	RAP2-13	XP_011074161.1 ethylene-responsive transcription factor RAP2-13 [Sesamum indicum]
Unigene0014770	6.1	6.18	2.87	31.1	32.28	44.23	-2.82842	3.56462e-16	CYP71D10	AGN04220.1 cytochrome P450 [Salvia miltiorrhiza]
Unigene0003504	53.2	57.68	47.81	9.9	8.83	18.69	2.08433	3.62274e-16	At2g24580	XP_012856011.1 PREDICTED: probable sarcosine oxidase [Erythranthe guttata]
Unigene0001447	1.34	1.1	2.09	10.15	10.54	7.85	-2.6554	3.68785e-16	KIPK2	XP_011090017.1 serine/threonine-protein kinase D6PKL1 [Sesamum indicum]
Unigene0005562	54.55	50.57	25.66	238	273.63	252.47	-2.54662	3.69382e-16	CIPK6	XP_011079428.1 CBL-interacting serine/threonine-protein kinase 6 [Sesamum indicum]
Unigene0020093	2.86	3.77	0.85	79.22	91.94	112.14	-5.24315	3.69689e-16	AVT1C	XP_012834952.1 PREDICTED: vacuolar amino acid transporter 1-like [Erythranthe guttata]
Unigene0032575	3.19	4.47	1.76	24.33	23.58	19.37	-2.83638	3.76143e-16	CYP71A9	PIN27046.1 Cytochrome P450 CYP2 subfamily [Handroanthus impetiginosus]
Unigene0005081	0.73	1.93	1.19	8.92	11.31	14.21	-3.16115	3.79696e-16	FBA6	GER54253.1 fructose-bisphosphate aldolase [Striga asiatica]
Unigene0003091	16.24	16.16	15.06	38.69	38.59	45.64	-1.37294	4.01372e-16	WAVH1	XP_011095861.1 uncharacterized protein LOC105175201 [Sesamum indicum]
Unigene0022097	0	0.16	0	16	7.78	9.24	-7.68912	4.10025e-16	At5g10770	PIN17998.1 Aspartyl protease [Handroanthus impetiginosus]
Unigene0026019	0.09	0.05	0.15	4.09	5.67	4.97	-5.66656	4.21122e-16	ASK1	TEY62216.1 hypothetical protein Saspl_009485 [Salvia splendens]
Unigene0006379	19.48	16.89	19.01	9	8.42	8.15	1.11491	4.47207e-16	AGD7	XP_011094839.1 probable ADP-ribosylation factor GTPase-activating protein AGD6 [Sesamum indicum]
Unigene0030365	51.99	45.76	44.08	19.33	18.5	22.44	1.23465	4.91708e-16	--	KZV20387.1 hypothetical protein F511_41551 [Dorcoceras hygrometricum]
Unigene0025584	54.54	51.58	96.1	20.46	17.62	17.39	1.86615	5.12097e-16	SULTR3;1	XP_011079899.1 sulfate transporter 3.1 [Sesamum indicum]
Unigene0004409	2.33	3.54	3.53	0.06	0.17	0.22	4.38466	5.94569e-16	SCL3	PIN13895.1 hypothetical protein CDL12_13477 [Handroanthus impetiginosus]
Unigene0026825	0.33	0.51	0.08	5.19	4.73	5.11	-4.03007	5.99559e-16	--	XP_011085406.1 uncharacterized protein LOC105167402 [Sesamum indicum]
Unigene0002608	2.67	3.57	3.34	0.28	0.23	0.12	3.9266	6.15072e-16	--	-
Unigene0029673	2.31	2.09	1.12	15.93	22.19	12.6	-3.19981	6.24268e-16	NAP2	XP_028086269.1 NAC domain-containing protein 2-like [Camellia sinensis]
Unigene0032198	0	0.11	0.12	8.89	10.31	4.63	-6.695	6.26452e-16	MTP4	XP_012834425.1 PREDICTED: metal tolerance protein 4 isoform X1 [Erythranthe guttata]
Unigene0023065	7.23	13.36	14.86	0.41	1.19	1.02	3.75815	6.46156e-16	--	-
Unigene0016574	8.75	8.43	8.19	23.68	24.21	28.44	-1.58913	6.55101e-16	PURA1	XP_020552417.1 transcription factor Pur-alpha 1 isoform X3 [Sesamum indicum]
Unigene0016693	33.07	32.66	27.18	102.19	82.93	101.46	-1.62503	6.78062e-16	psaD	PIN17111.1 hypothetical protein CDL12_10218 [Handroanthus impetiginosus]
Unigene0004711	4.93	7.73	6.85	0.7	0.46	0.1	3.95272	6.81647e-16	MAPKKK18	XP_011095801.1 mitogen-activated protein kinase kinase kinase 2 [Sesamum indicum]
Unigene0004052	6.94	9.44	10.04	27.31	26.25	26.03	-1.59096	6.90078e-16	LACS1	AJQ20635.1 Long-Chain Acyl-CoA Synthetase [Salvia miltiorrhiza]
Unigene0014771	0.37	0.74	0.65	4.21	5.82	6.85	-3.26167	7.10775e-16	--	-
Unigene0002185	11.57	11.97	10.01	4.08	3.78	3.89	1.51365	7.1636e-16	--	XP_011086573.1 uncharacterized protein LOC105168262 [Sesamum indicum]
Unigene0019008	0	0	0	17.75	14.61	9.17	-13.7569	7.22438e-16	YKL091C	PIN07103.1 Phosphatidylinositol transfer protein PDR16 [Handroanthus impetiginosus]
Unigene0027883	1.25	1.57	1.55	6.8	8.25	10.31	-2.53685	7.45488e-16	GLK1	XP_022877228.1 probable transcription factor GLK1 isoform X1 [Olea europaea var. sylvestris] [Olea europaea]
Unigene0030875	0.11	0.19	0.13	9.36	4.19	8.89	-5.70559	7.46478e-16	HPR	XP_011092968.1 glycerate dehydrogenase HPR, peroxisomal [Sesamum indicum]
Unigene0023961	3.31	6.61	6.55	0.65	0.97	0.98	2.66326	8.0835e-16	ATH1	XP_020550152.1 homeobox protein ATH1-like [Sesamum indicum]
Unigene0029528	2.59	5.89	4.88	23.62	30.96	23.73	-2.55128	8.42904e-16	WRKY40	XP_011082382.1 probable WRKY transcription factor 40 [Sesamum indicum]
Unigene0026159	0.22	0.05	0.28	4.56	3.45	4.13	-4.46419	8.43026e-16	CYP734A1	XP_011072254.1 cytochrome P450 734A1 [Sesamum indicum]
Unigene0016428	68.65	70.42	49.31	27.93	26.52	27.5	1.20083	8.69888e-16	POX1	XP_011099089.1 proline dehydrogenase 2, mitochondrial isoform X1 [Sesamum indicum]
Unigene0023386	0.78	3.01	1.96	18.77	20.39	22.82	-3.43017	9.15476e-16	--	PIN23684.1 hypothetical protein CDL12_03593 [Handroanthus impetiginosus]
Unigene0036677	4.29	4.22	5.56	23.09	18.95	19.64	-2.13218	9.35535e-16	Os12g0502000	TKS00561.1 hypothetical protein D5086_0000181920 [Populus alba]
Unigene0013720	16.47	16.78	18.18	8.58	7.79	9.23	1.00647	9.83377e-16	At5g57100	PIM98327.1 Glucose-6-phosphate/phosphate and phosphoenolpyruvate/phosphate antiporter [Handroanthus impetiginosus]
Unigene0024908	1.21	1.17	1.08	6.53	7.78	6.03	-2.55548	1.00453e-15	CKL1	XP_011079987.1 casein kinase 1-like protein 2 [Sesamum indicum]
Unigene0033033	104.11	170	111.31	49.48	46.98	54.31	1.35408	1.0685e-15	LWD1	XP_011096638.1 WD repeat-containing protein LWD1 [Sesamum indicum]
Unigene0000925	0.14	0.11	0.08	8.03	3.62	7.82	-5.88264	1.09026e-15	At3g55800	XP_011084948.1 sedoheptulose-1,7-bisphosphatase, chloroplastic [Sesamum indicum]
Unigene0022189	0.67	0.58	1.04	8.94	10.49	11.2	-3.74153	1.13204e-15	--	-
Unigene0015509	15.74	12.81	11.08	3.1	3.98	2.53	2.04398	1.17357e-15	RABA4D	PIN13202.1 GTPase Rab11/YPT3, small G protein superfamily [Handroanthus impetiginosus]
Unigene0007402	8.11	8.23	8.11	25.66	23.24	20.13	-1.49739	1.18253e-15	CAMTA5	XP_011100790.1 calmodulin-binding transcription activator 5 isoform X2 [Sesamum indicum]
Unigene0009332	13.97	16.56	14.35	4.53	5.57	6.7	1.41761	1.21507e-15	STY13	CAN60343.1 hypothetical protein VITISV_017020 [Vitis vinifera]
Unigene0003531	1.22	1.2	2.27	9.57	9.12	9.28	-2.57622	1.27869e-15	At1g63430	XP_011072429.1 probable LRR receptor-like serine/threonine-protein kinase At1g63430 isoform X1 [Sesamum indicum]
Unigene0014432	32.96	45.32	31.32	14.56	12.86	17.09	1.30005	1.29448e-15	AEL1	XP_011099609.1 maf-like protein DDB_G0281937 [Sesamum indicum]
Unigene0033162	15.57	16.18	14.44	6.35	6.38	7.32	1.20398	1.31556e-15	RABH1E	GER47626.1 RAB GTPase homolog H1E [Striga asiatica]
Unigene0028808	48.56	29.89	49.26	13.63	14.64	13.28	1.61995	1.3662e-15	ERD4	GER36769.1 early-responsive to dehydration stress family protein [Striga asiatica]
Unigene0035858	25.86	20.67	30.92	9.11	7.12	5.55	1.83026	1.37795e-15	CYP93A3	XP_011075268.1 cytochrome P450 93A3-like [Sesamum indicum]
Unigene0027487	9.12	8.77	9.93	25.01	21.7	26.89	-1.40358	1.41328e-15	PPD	PIN07985.1 Pyruvate, phosphate dikinase [Handroanthus impetiginosus]
Unigene0031804	26.42	24.42	25.17	57.73	57.25	57.99	-1.18626	1.41924e-15	PRT1	XP_011080193.1 E3 ubiquitin-protein ligase PRT1 isoform X1 [Sesamum indicum]
Unigene0024550	165.08	142.2	180.79	81.28	76.73	61.16	1.15504	1.43581e-15	MLO1	XP_022875162.1 MLO-like protein 1 isoform X1 [Olea europaea var. sylvestris] [Olea europaea]
Unigene0002731	7.55	8.02	5.91	23.15	26.73	24.35	-1.78901	1.44081e-15	At4g28100	XP_012852478.1 PREDICTED: uncharacterized GPI-anchored protein At4g28100 [Erythranthe guttata]
Unigene0034381	17.29	29.23	33.5	6.93	8.5	6.97	1.83686	1.55672e-15	WRKY24	XP_011080757.1 probable WRKY transcription factor 25 [Sesamum indicum]
Unigene0027194	10.63	12.31	11.93	4.6	4.64	5.17	1.27492	1.6037e-15	At2g16790	XP_011095288.1 probable gluconokinase isoform X1 [Sesamum indicum]
Unigene0002326	0	0	0	15.59	12.98	13.26	-13.7673	1.60433e-15	PER51	NP_001306621.1 peroxidase 73 precursor [Sesamum indicum]
Unigene0036413	6.38	9.86	5.12	0.35	0.56	1.05	3.44599	1.68843e-15	CRPK1	XP_011094993.1 putative serine/threonine-protein kinase [Sesamum indicum]
Unigene0009878	1.23	0.75	1.9	13.45	12.41	9.99	-3.20784	1.69223e-15	At3g19800	PIN26220.1 hypothetical protein CDL12_01035 [Handroanthus impetiginosus]
Unigene0023593	0.11	1.39	0.19	15.51	15.49	18.36	-4.86825	1.74976e-15	--	-
Unigene0000386	26.99	21.88	26.63	7.03	3.47	3.46	2.43518	1.77421e-15	ICS2	XP_011087218.1 isochorismate synthase, chloroplastic [Sesamum indicum]
Unigene0025098	0.16	0.1	0.16	4.23	3.14	4.07	-4.76755	1.78275e-15	PATL3	XP_011096149.1 patellin-3 [Sesamum indicum]
Unigene0031067	0.52	1.45	0.48	7.84	11.92	12.37	-3.71307	1.83149e-15	DIVARICATA	PIN25047.1 Zuotin [Handroanthus impetiginosus]
Unigene0026158	0	0	0.03	13.63	13.26	14.6	-10.4336	1.88359e-15	CYP734A1	PIN12065.1 Cytochrome P450 CYP4/CYP19/CYP26 subfamily [Handroanthus impetiginosus]
Unigene0010696	41.2	28.89	60.18	251.99	236.62	203.47	-2.40943	1.88359e-15	--	XP_011086143.1 uncharacterized protein LOC105167945 [Sesamum indicum]
Unigene0035213	20.05	23.81	16.87	6.63	8.31	8	1.40454	1.88629e-15	QPT	XP_011075690.1 nicotinate-nucleotide pyrophosphorylase [carboxylating], chloroplastic [Sesamum indicum]
Unigene0007784	195.59	117.46	158	44.26	43.43	24.72	2.06711	1.90611e-15	At5g56590	XP_011097840.1 glucan endo-1,3-beta-glucosidase 13 [Sesamum indicum]
Unigene0005447	36.49	37.84	13.76	3.51	5.04	3.59	2.85921	1.9128e-15	--	XP_022872311.1 uncharacterized protein LOC111391343 isoform X1 [Olea europaea var. sylvestris] [Olea europaea]
Unigene0029119	3.84	4.7	3.42	15.95	19.41	13.89	-2.04191	1.9444e-15	ATL13	XP_011069846.1 RING-H2 finger protein ATL13 [Sesamum indicum]
Unigene0028085	0.03	0.04	0.03	7.01	5.38	5.26	-7.46352	1.99414e-15	CIA2	XP_020553248.1 protein CHLOROPLAST IMPORT APPARATUS 2-like [Sesamum indicum]
Unigene0003391	19.3	17.79	21.54	3.17	4.75	6.01	2.07344	2.04838e-15	DIR23	XP_011088569.1 dirigent protein 23-like [Sesamum indicum]
Unigene0014157	64.46	56.41	65.2	190.98	174.25	151.74	-1.47424	2.22368e-15	MPK9	XP_011075601.1 mitogen-activated protein kinase 9-like [Sesamum indicum]
Unigene0005769	8.49	6.31	6.48	0.56	0.39	1.18	3.32057	2.25412e-15	IBH1	XP_011080538.1 transcription factor IBH1-like [Sesamum indicum]
Unigene0036311	10.58	8.89	20.76	89.65	85.07	82.48	-2.67655	2.26104e-15	OPT7	XP_011070370.1 oligopeptide transporter 7 [Sesamum indicum]
Unigene0010862	7.55	4.77	3.53	0.5	0.35	0.39	3.67607	2.32385e-15	At2g19810	PIN14151.1 CCCH-type Zn-finger protein [Handroanthus impetiginosus]
Unigene0004252	3.47	8.47	4.95	0.04	0	0.12	6.72195	2.40498e-15	At5g13600	XP_011081061.1 root phototropism protein 3 [Sesamum indicum]
Unigene0031033	42.08	37.11	39.86	103.78	91.84	101.01	-1.3171	2.61701e-15	SDH	GER34980.1 sorbitol dehydrogenase [Striga asiatica]
Unigene0034318	2.57	3.33	3.81	14.02	12.71	17.78	-2.19659	2.61701e-15	SEC14L5	XP_011086275.1 phosphatidylinositol/phosphatidylcholine transfer protein SFH2 [Sesamum indicum]
Unigene0030872	6.31	4.48	5.86	33.35	32.35	24.53	-2.43809	2.6776e-15	--	XP_011079757.1 uncharacterized protein LOC105163197 [Sesamum indicum]
Unigene0024418	0.14	0	0.42	6.12	4.62	6.85	-4.97318	2.6776e-15	CSLA2	XP_011089999.1 glucomannan 4-beta-mannosyltransferase 2 [Sesamum indicum]
Unigene0033920	1.98	1.39	1.35	11.92	12.5	8.51	-2.80254	2.68831e-15	--	KZV51509.1 dentin sialophosphoprotein-like [Dorcoceras hygrometricum]
Unigene0001020	6.45	8.11	8.12	23.11	20.17	23.72	-1.56274	2.9097e-15	--	XP_011089872.1 uncharacterized protein LOC105170693 [Sesamum indicum]
Unigene0008662	5.59	3.32	4.73	25.61	26.1	18.32	-2.36013	2.99103e-15	THE1	XP_020554434.1 receptor-like protein kinase THESEUS 1 [Sesamum indicum]
Unigene0004403	57.52	53.36	60.09	133.9	141.14	130.2	-1.24503	2.99132e-15	RPL15	PIN09319.1 60s ribosomal protein L15 [Handroanthus impetiginosus]
Unigene0031860	1.88	2.15	4.43	21.72	27.94	23.91	-3.12039	3.04746e-15	HSP17.5-M	TEY15067.1 HSP20 family protein [Salvia splendens]
Unigene0036243	19.46	25.26	11.11	3.64	3.83	3.69	2.3227	3.04823e-15	GLTP3	XP_011101681.1 glycolipid transfer protein 3 isoform X1 [Sesamum indicum]
Unigene0003154	9.69	15.67	13.69	45.32	43.08	40.14	-1.71882	3.07281e-15	IDD14	XP_011073161.1 protein SHOOT GRAVITROPISM 5-like [Sesamum indicum]
Unigene0026328	0.22	0.55	0.19	5.44	5.17	6.87	-4.18653	3.10305e-15	--	XP_011086654.1 uncharacterized protein LOC105168317 [Sesamum indicum]
Unigene0017021	2.05	3.26	4.74	23.94	17.4	26.27	-2.75004	3.1205e-15	GAD	XP_011085900.1 glutamate decarboxylase [Sesamum indicum]
Unigene0011231	8.48	8.18	11.35	0.27	0	0.2	5.89714	3.16838e-15	CYP75B2	BAB87838.1 flavonoid 3'-hydroxylase [Torenia hybrid cultivar]
Unigene0023625	0.17	0.1	0.14	3.99	3.95	7.21	-5.20755	3.27996e-15	GC1	PIN06249.1 putative nucleoside-diphosphate sugar epimerase [Handroanthus impetiginosus]
Unigene0032408	11.02	11.21	5.82	0.73	1.55	0.76	3.20586	3.28627e-15	RING1	XP_011098046.1 uncharacterized protein LOC105176825 [Sesamum indicum]
Unigene0035849	1.01	1.42	2.11	11.96	9.89	8.79	-2.75465	3.31215e-15	At5g59250	XP_011089518.1 D-xylose-proton symporter-like 3, chloroplastic [Sesamum indicum]
Unigene0011830	1.34	1.47	2.79	11.35	10.5	10.51	-2.53071	3.33484e-15	DCL4	XP_012844160.1 PREDICTED: dicer-like protein 4 isoform X1 [Erythranthe guttata]
Unigene0002300	4.63	5.16	6.94	0.29	0.25	0.76	3.68585	3.33484e-15	TBL42	PIN15941.1 hypothetical protein CDL12_11394 [Handroanthus impetiginosus]
Unigene0008765	47.4	60.61	36.51	13.41	16.8	18.78	1.56071	3.36388e-15	OsI_025867	XP_030956869.1 probable 6-phosphogluconolactonase 1 [Quercus lobata]
Unigene0027630	38.33	41.13	37.43	18.39	19.15	13.06	1.20794	3.36678e-15	NAT12	XP_012837973.1 PREDICTED: nucleobase-ascorbate transporter 12-like [Erythranthe guttata]
Unigene0012509	61.2	42.6	48.8	20.97	17.4	21.05	1.36073	3.46512e-15	BC10	XP_020552567.1 uncharacterized protein LOC105170072 [Sesamum indicum]
Unigene0033203	26.01	32.65	43.14	9.9	12.45	13.39	1.51013	3.49353e-15	DESI1	TEY18811.1 hypothetical protein Saspl_049952 [Salvia splendens]
Unigene0000605	6.9	8.68	5.2	0.13	0.17	0.07	5.81153	3.52784e-15	OFP11	XP_012837203.1 PREDICTED: transcription repressor OFP16-like [Erythranthe guttata]
Unigene0000074	13.86	13.72	13.22	33.87	34.72	30.46	-1.27959	3.52784e-15	PTI13	GER41652.1 protein kinase superfamily protein [Striga asiatica]
Unigene0030297	10.18	11.43	11.63	5.48	4.48	4.94	1.15761	3.56485e-15	CP2	XP_011076106.1 uncharacterized PKHD-type hydroxylase At1g22950 [Sesamum indicum]
Unigene0026538	0.41	0.38	0.52	6.43	10.08	5	-4.03737	3.7435e-15	At2g23060	PIN08443.1 hypothetical protein CDL12_18985 [Handroanthus impetiginosus]
Unigene0023498	49.92	57.03	44.51	22.38	23.01	28.8	1.02964	3.83524e-15	CUL1	XP_016542284.1 PREDICTED: cullin-1-like [Capsicum annuum]
Unigene0031030	76.12	81.36	57.14	30.19	35.29	28.55	1.19059	3.91395e-15	NGA1	PIM99646.1 hypothetical protein CDL12_27857 [Handroanthus impetiginosus]
Unigene0014912	0.59	0.59	0.87	5.61	5.28	4.34	-2.89322	3.98529e-15	SKU5	XP_011081204.1 monocopper oxidase-like protein SKU5 [Sesamum indicum]
Unigene0034060	10.95	9.26	15.15	3.16	2.98	4.03	1.7978	4.08616e-15	GUX3	XP_011073953.1 putative UDP-glucuronate:xylan alpha-glucuronosyltransferase 3 [Sesamum indicum]
Unigene0029222	1.1	0.33	1.15	7.81	10.21	10.23	-3.45281	4.12594e-15	ABA4	XP_019261710.1 PREDICTED: protein ABA DEFICIENT 4, chloroplastic-like isoform X1 [Nicotiana attenuata]
Unigene0031322	42.01	44.12	38.02	14.34	16.72	21.67	1.23539	4.41809e-15	--	XP_011087965.1 coiled-coil-helix-coiled-coil-helix domain-containing protein 10, mitochondrial [Sesamum indicum]
Unigene0033267	6.63	10.08	13.92	1.13	1.19	0.36	3.51464	4.43932e-15	--	XP_011069621.2 uncharacterized protein LOC105155444, partial [Sesamum indicum]
Unigene0034801	0.22	0	0.18	3.62	4.16	2.87	-4.73471	4.54701e-15	SERK1	XP_011074139.1 somatic embryogenesis receptor kinase 2 [Sesamum indicum]
Unigene0025803	10.56	21.9	24.04	3.62	2.2	3.44	2.60917	4.62128e-15	TIFY10B	PIM99899.1 hypothetical protein CDL12_27600 [Handroanthus impetiginosus]
Unigene0025553	64.04	76.14	69.92	149.49	152.23	169.7	-1.16594	4.64824e-15	RPL27AC	TEY36332.1 large subunit ribosomal protein L27Ae [Salvia splendens]
Unigene0000559	7.47	5.74	8.54	1.25	1.34	1.33	2.47209	4.64824e-15	--	XP_011094850.1 cyclin-dependent protein kinase inhibitor SMR3 [Sesamum indicum]
Unigene0018579	0.25	0.1	1.05	23.59	10.91	15.87	-5.16907	4.93558e-15	CCOAOMT1	XP_012836932.1 PREDICTED: caffeoyl-CoA O-methyltransferase [Erythranthe guttata]
Unigene0028389	10.7	8.03	8.87	29.88	31.32	27.32	-1.68134	5.01408e-15	--	XP_011095583.1 uncharacterized protein LOC105174992 [Sesamum indicum]
Unigene0033903	15.13	19.56	12.36	2.78	3.84	3.66	2.19435	5.03426e-15	--	TEY72370.1 hypothetical protein Saspl_001818 [Salvia splendens]
Unigene0012253	0.08	0.46	0.19	6.45	7.56	8.83	-4.96752	5.04338e-15	TOM20	XP_023002768.1 mitochondrial import receptor subunit TOM20-like [Cucurbita maxima]
Unigene0024805	5.17	7.77	5.01	22.94	23.17	20.2	-1.88524	5.15383e-15	ZFP4	PIA33081.1 hypothetical protein AQUCO_04200084v1 [Aquilegia coerulea]
Unigene0012753	4.08	4.44	4.78	14.37	12.32	12.79	-1.5697	5.20983e-15	NCER1	XP_011080865.1 neutral ceramidase isoform X1 [Sesamum indicum]
Unigene0024249	7.03	9.29	7.04	31.83	22.86	37.44	-1.97963	5.48172e-15	CHLH	XP_011075248.1 magnesium-chelatase subunit ChlH, chloroplastic [Sesamum indicum]
Unigene0021467	0.03	0.08	0	6.68	4.28	9.59	-7.54549	5.6299e-15	CNGC4	XP_012827536.1 PREDICTED: cyclic nucleotide-gated ion channel 4 isoform X1 [Erythranthe guttata]
Unigene0017093	3.65	5.58	4.29	13.39	13.38	14.19	-1.59912	5.79717e-15	SPAC3H5.08c	XP_011099777.1 uncharacterized protein LOC105178110 [Sesamum indicum]
Unigene0012508	34.27	29.84	40.59	16.79	15.71	14.64	1.15124	6.08002e-15	BC10	XP_011090293.1 uncharacterized protein LOC105171003 [Sesamum indicum]
Unigene0019316	22.01	18.35	22.09	5.81	5.67	7.05	1.75284	6.17705e-15	--	XP_020552731.1 putative late blight resistance protein homolog R1B-16 isoform X1 [Sesamum indicum]
Unigene0032861	11.09	12.71	15.39	37.44	50.3	47.95	-1.79176	6.26885e-15	ACL5	XP_012858007.1 PREDICTED: thermospermine synthase ACAULIS5 [Erythranthe guttata]
Unigene0020058	47.05	37.84	55.41	20.35	19.92	16.25	1.31168	6.26885e-15	FIM5	XP_011095479.1 fimbrin-1 [Sesamum indicum]
Unigene0025551	74.4	87.04	81.83	159.09	178.56	177.62	-1.08277	6.3634e-15	RPL27AC	TEY36332.1 large subunit ribosomal protein L27Ae [Salvia splendens]
Unigene0013143	30.83	40.83	39.78	89.86	93.56	103.71	-1.36544	6.36418e-15	SMT2	PIN09489.1 SAM-dependent methyltransferase [Handroanthus impetiginosus]
Unigene0033581	0	0.06	0	15.68	15.49	21.56	-9.77945	6.56926e-15	RSS3	XP_011086528.1 uncharacterized protein LOC105168232 isoform X1 [Sesamum indicum]
Unigene0003986	113.68	154.34	118.97	58.22	56.65	72.45	1.04679	6.62321e-15	At5g01610	TEY61027.1 hypothetical protein Saspl_033306 [Salvia splendens]
Unigene0003368	21.5	24.31	18.04	10.12	7.4	7.14	1.37251	6.64851e-15	At5g09300	XP_011099727.1 2-oxoisovalerate dehydrogenase subunit alpha 2, mitochondrial-like [Sesamum indicum]
Unigene0002052	4.77	5.37	6.55	16.98	16.27	16.73	-1.58237	6.64869e-15	SAC51	GER30418.1 transcription factor, partial [Striga asiatica]
Unigene0007666	53.99	27.54	35.27	4.64	7.06	2.12	3.07921	6.70349e-15	CYP71A6	PIM99256.1 Cytochrome P450 CYP2 subfamily [Handroanthus impetiginosus]
Unigene0030712	0.53	1.09	0.68	5.24	6.66	8.42	-3.14319	6.7138e-15	At1g80170	XP_011081272.1 probable polygalacturonase At1g80170 [Sesamum indicum]
Unigene0012745	31.83	26.44	26.12	74.47	82.29	76.45	-1.46649	6.73771e-15	RHG1A	PIN17883.1 hypothetical protein CDL12_09456 [Handroanthus impetiginosus]
Unigene0034946	4.05	10.11	6.64	0.45	0.07	0.25	4.75558	6.76118e-15	GSTU18	GER32283.1 glutathione S-transferase family protein [Striga asiatica]
Unigene0035713	0.07	0.24	0.11	6.35	6.32	6.69	-5.52655	6.88673e-15	NAC021	KZV17664.1 NAC domain-containing protein 21/22 isoform 1 [Dorcoceras hygrometricum]
Unigene0029517	0.28	0.33	0.37	2.25	1.88	2.52	-2.7625	7.00643e-15	MYR2	XP_022882951.1 myb-related protein 1-like isoform X4 [Olea europaea var. sylvestris] [Olea europaea]
Unigene0005246	5.66	6.41	4.85	21.72	16.06	24.89	-1.88905	7.06933e-15	TSS	AWY63024.1 tetratricopeptide repeat-like superfamily protein [Erythranthe lewisii]
Unigene0027256	4.72	3.52	3.94	17.64	25.49	17.68	-2.31979	7.07089e-15	BBX21	PIN04965.1 hypothetical protein CDL12_22496 [Handroanthus impetiginosus]
Unigene0033514	132.7	142.29	112.11	337.19	369.7	311.25	-1.39516	7.12064e-15	CURT1A	TEY11664.1 translation initiation factor 1A [Salvia splendens]
Unigene0015479	79.2	113.04	45.06	11.88	14.76	19.22	2.3714	7.4588e-15	--	XP_019241325.1 PREDICTED: uncharacterized protein LOC109221310 isoform X1 [Nicotiana attenuata]
Unigene0011331	0.79	1.13	0.62	5.66	7.03	7.15	-2.96551	7.8141e-15	OsI_19565	AYE54698.1 ALOG2 [Torenia fournieri]
Unigene0025437	14.51	17.11	18.23	7.36	5.88	6.38	1.34527	7.85063e-15	--	XP_011070558.1 SEC14 cytosolic factor [Sesamum indicum]
Unigene0034234	0	0	0	22.93	12.76	17.15	-14.1044	8.26882e-15	FLP2	XP_011095550.1 flowering-promoting factor 1-like [Sesamum indicum]
Unigene0003354	0.37	0.51	0.22	6.36	4.67	5.12	-3.87596	8.31346e-15	SRG1	PIN14355.1 Iron/ascorbate family oxidoreductase [Handroanthus impetiginosus]
Unigene0007625	3.12	4.22	3.94	15.87	16.39	17.61	-2.14441	8.35376e-15	--	XP_012853482.1 PREDICTED: uncharacterized protein LOC105973035 [Erythranthe guttata]
Unigene0015025	14.24	12.42	16.68	61.68	49.91	90.4	-2.22051	8.74086e-15	--	PIN13337.1 hypothetical protein CDL12_14042 [Handroanthus impetiginosus]
Unigene0029626	6.1	5.72	6.7	1.07	1.78	0.78	2.35104	8.79921e-15	--	XP_011089273.1 uncharacterized protein LOC105170283 [Sesamum indicum]
Unigene0000515	0.06	0.44	0.46	5.91	7.36	4.35	-4.19804	8.87362e-15	AAP3	KZV23195.1 hypothetical protein F511_05034 [Dorcoceras hygrometricum]
Unigene0000039	1.27	1.47	1.25	5.77	5.28	6.86	-2.1663	9.05537e-15	--	XP_012832107.1 PREDICTED: uncharacterized protein LOC105953035 [Erythranthe guttata]
Unigene0003489	8.49	8.31	7.41	3.38	3.46	3.26	1.26125	9.13432e-15	HSP70-8	XP_011090717.1 heat shock 70 kDa protein 8 [Sesamum indicum]
Unigene0032442	16.95	16.3	13.46	6.59	6.6	7.12	1.20154	9.22204e-15	rexo4	XP_011082722.1 RNA exonuclease 4 isoform X1 [Sesamum indicum]
Unigene0004712	7.97	9.83	10.07	3.7	3.24	2.37	1.58186	9.29113e-15	CBP60B	PIN10830.1 hypothetical protein CDL12_16577 [Handroanthus impetiginosus]
Unigene0006842	2.6	2.68	2.86	1.1	1	1.15	1.32459	9.45081e-15	At4g27290	XP_012827565.1 PREDICTED: G-type lectin S-receptor-like serine/threonine-protein kinase At4g27290 [Erythranthe guttata]
Unigene0006025	1.3	2.93	1.32	15.43	13.76	18.94	-3.11638	9.51574e-15	PNSB4	XP_011071692.1 photosynthetic NDH subunit of subcomplex B 4, chloroplastic [Sesamum indicum]
Unigene0018274	28.73	26.57	22.76	75.6	72.63	66.78	-1.46175	9.58929e-15	ICME	XP_012852452.1 PREDICTED: isoprenylcysteine alpha-carbonyl methylesterase ICME isoform X2 [Erythranthe guttata]
Unigene0003296	0.93	1.43	1.7	7.82	7.05	11.01	-2.67229	9.70991e-15	--	TEY31060.1 hypothetical protein Saspl_043608 [Salvia splendens]
Unigene0036497	0	0.05	0.03	12.97	10.68	10.49	-8.73725	9.80196e-15	SCP26	PIN18106.1 Serine carboxypeptidases (lysosomal cathepsin A) [Handroanthus impetiginosus]
Unigene0019514	15.4	17.72	15.94	0.25	0.16	0	6.90278	1.00976e-14	--	-
Unigene0024296	13.97	8.17	7.66	0.85	1.17	0.24	3.72092	1.02117e-14	syf1	XP_011093520.1 pre-mRNA-splicing factor SYF1 [Sesamum indicum]
Unigene0002550	8.21	5.75	9.38	52.4	54.77	30.5	-2.56034	1.11382e-14	TYDC2	PIN03085.1 Aromatic-L-amino-acid/L-histidine decarboxylase [Handroanthus impetiginosus]
Unigene0032040	0.11	0.2	0	6.22	5.45	9.47	-6.09156	1.15858e-14	FBX13	XP_011081957.1 F-box only protein 13 [Sesamum indicum]
Unigene0009720	3.2	5.25	4.13	17.04	23.71	17.93	-2.22174	1.17568e-14	--	-
Unigene0032186	2.23	7.54	11.94	118.34	84.07	92.71	-3.76487	1.22503e-14	TUBB2	AKG50113.1 beta-tublin [Betula luminifera]
Unigene0023993	1.7	1.56	3.72	18.36	17.61	16.44	-2.90854	1.22564e-14	BAG1	XP_011076229.1 LOW QUALITY PROTEIN: BAG family molecular chaperone regulator 2 [Sesamum indicum]
Unigene0027415	14.39	14.47	18.09	41.5	40.29	39.26	-1.36641	1.24724e-14	At1g31850	PIN02393.1 Sterol 24-C-methyltransferase [Handroanthus impetiginosus]
Unigene0036238	13.48	18.09	14.92	7.8	6.89	7.93	1.03932	1.24957e-14	--	TEY15154.1 hypothetical protein Saspl_005717 [Salvia splendens]
Unigene0015802	0.88	1.12	0.5	6.77	10.34	16.94	-3.76765	1.25792e-14	HHT1	XP_011075071.1 shikimate O-hydroxycinnamoyltransferase-like [Sesamum indicum]
Unigene0006550	1.7	7.14	7.12	0.23	0.23	0.16	4.68605	1.26246e-14	4CLL1	XP_011098730.1 4-coumarate--CoA ligase-like 1 isoform X1 [Sesamum indicum]
Unigene0031906	9.04	8.5	7.83	24.5	25.9	21.24	-1.49764	1.31235e-14	At4g17486	TEY79013.1 hypothetical protein Saspl_009641 [Salvia splendens]
Unigene0001955	7.7	8.61	7.91	18.78	18.68	17.86	-1.1916	1.36277e-14	PPF-1	XP_019232214.1 PREDICTED: inner membrane protein PPF-1, chloroplastic [Nicotiana attenuata]
Unigene0014501	6.06	4.19	7.03	25	22.22	23.45	-2.03199	1.38454e-14	TBL6	XP_011079550.1 protein trichome birefringence-like 6 [Sesamum indicum]
Unigene0013554	4.07	4.84	7.43	25.4	28.23	34.68	-2.43417	1.38454e-14	--	XP_011070772.1 uncharacterized protein LOC105156358 [Sesamum indicum]
Unigene0016954	2.63	8.5	9.8	0.49	0.44	0.17	4.25	1.41529e-14	WAKL1	XP_012831228.1 PREDICTED: wall-associated receptor kinase-like 8 [Erythranthe guttata]
Unigene0026660	19.05	23.47	22.23	8.97	11.89	10.81	1.03176	1.43324e-14	BPC2	XP_011070518.1 protein BASIC PENTACYSTEINE1-like [Sesamum indicum]
Unigene0008423	0.25	0.1	0.76	9.94	9.07	7.9	-4.59951	1.50715e-14	--	PIN09224.1 hypothetical protein CDL12_18195 [Handroanthus impetiginosus]
Unigene0027641	26.28	27.54	26.72	56.49	62.54	61.06	-1.16094	1.53331e-14	At3g49470	VVA11403.1 PREDICTED: nascent [Prunus dulcis]
Unigene0001408	84.97	87.7	142.51	39.41	36.76	31.39	1.55103	1.59578e-14	Bp10	TEY89281.1 hypothetical protein Saspl_007884 [Salvia splendens]
Unigene0010393	9.31	5.83	15.45	0.91	1.48	1.58	2.94585	1.75935e-14	PGSIP8	XP_011081254.1 putative glucuronosyltransferase PGSIP8 [Sesamum indicum]
Unigene0033195	3.87	3.1	4.73	15.37	14.85	14.82	-1.9447	1.76374e-14	SFH6	XP_011083650.1 phosphatidylinositol/phosphatidylcholine transfer protein SFH6 isoform X2 [Sesamum indicum]
Unigene0015980	9.34	8.71	15.59	2.06	1.56	1.78	2.63915	1.79311e-14	UBC19	XP_011080377.1 ubiquitin-conjugating enzyme E2 19 [Sesamum indicum]
Unigene0002656	6.93	7.97	7.7	3.03	2.78	3.24	1.32033	1.83181e-14	PRS3	XP_012855306.1 PREDICTED: ribose-phosphate pyrophosphokinase 4 [Erythranthe guttata]
Unigene0024232	0	0.06	0.04	2.69	2.91	3.61	-6.52513	1.83363e-14	R1B-16	XP_012841521.1 PREDICTED: putative late blight resistance protein homolog R1B-16 [Erythranthe guttata]
Unigene0022995	35.3	34.79	38.36	75.6	74.47	79.27	-1.08046	1.90277e-14	At1g60420	XP_011071086.1 probable nucleoredoxin 1 [Sesamum indicum]
Unigene0014038	11.52	9.63	19.47	0.05	0	0.06	8.52854	1.96607e-14	XTH32	XP_011089954.1 probable xyloglucan endotransglucosylase/hydrolase protein 32 [Sesamum indicum]
Unigene0024193	9.04	11.07	10.43	3.78	3.42	4.74	1.3549	1.99855e-14	YPQ1	XP_011069980.1 uncharacterized protein LOC105155744 [Sesamum indicum]
Unigene0026249	0.65	1.22	1.02	5.45	5.91	7.7	-2.72141	2.00791e-14	At1g11820	KAA8545304.1 hypothetical protein F0562_020088 [Nyssa sinensis]
Unigene0032145	20	22.53	16.26	8.9	9.15	9.06	1.11675	2.06931e-14	PBL19	PIN16115.1 Serine/threonine protein kinase [Handroanthus impetiginosus]
Unigene0032233	4.9	5.24	4.41	0.55	1.15	0.57	2.68025	2.07834e-14	--	XP_011084989.1 uncharacterized protein LOC105167112 [Sesamum indicum]
Unigene0004273	15.26	27.6	25.28	7.09	7.68	8.37	1.55811	2.16144e-14	WRKY11	XP_011082056.1 probable WRKY transcription factor 17 [Sesamum indicum]
Unigene0035053	5.07	1.11	4.72	151.34	151.78	135.52	-5.33064	2.16239e-14	At5g45950	PIN10423.1 hypothetical protein CDL12_16986 [Handroanthus impetiginosus]
Unigene0024739	3.46	4.8	5.1	14.68	12.9	14.89	-1.66852	2.21881e-14	NRG2	PIN00764.1 hypothetical protein CDL12_26734 [Handroanthus impetiginosus]
Unigene0002883	33.94	43.11	16.47	5.44	5.5	6.28	2.44119	2.23901e-14	--	PIN15165.1 hypothetical protein CDL12_12193 [Handroanthus impetiginosus]
Unigene0001210	0.65	0.57	0.78	6.04	5.2	3.77	-2.90785	2.24917e-14	naf1	XP_011085362.1 uncharacterized protein LOC105167372 [Sesamum indicum]
Unigene0008054	4.81	4.46	5.41	1.15	1	1.36	2.06431	2.32132e-14	At1g12700	XP_020552900.1 pentatricopeptide repeat-containing protein At5g65560-like [Sesamum indicum]
Unigene0026196	14.34	13.42	18.09	0	0.45	0	6.67085	2.38958e-14	--	-
Unigene0033511	24.3	20.34	24.73	65.28	58.4	59.36	-1.39978	2.39726e-14	EDR2	XP_011078691.1 protein ENHANCED DISEASE RESISTANCE 2-like [Sesamum indicum]
Unigene0033037	10.31	8.94	7.05	27.49	31.62	33.12	-1.81017	2.51778e-14	CDF3	XP_011087240.1 cyclic dof factor 1 [Sesamum indicum]
Unigene0028951	0	0	0	7.69	7.41	5.56	-12.7496	2.55803e-14	XLT2	PIN24508.1 Acetylglucosaminyltransferase EXT1/exostosin 1 [Handroanthus impetiginosus]
Unigene0021418	0.08	0	0	13.41	8	18.18	-8.95092	2.61094e-14	ADG2	XP_011090768.1 glucose-1-phosphate adenylyltransferase large subunit 3, chloroplastic/amyloplastic [Sesamum indicum]
Unigene0034306	10.8	13.29	10.24	3.49	3.86	3.7	1.63542	2.64026e-14	ERF016	TEY55241.1 EREBP-like factor [Salvia splendens]
Unigene0014128	5.19	6.26	8.18	21.84	22.04	21.38	-1.73314	2.65682e-14	Os08g0500300	PIN04356.1 Serine/threonine protein phosphatase [Handroanthus impetiginosus]
Unigene0025827	15.76	21.91	11.73	3.44	5.1	4.56	1.91494	2.66162e-14	RR4	TEY92109.1 two-component response regulator ARR-A family [Salvia splendens]
Unigene0033754	54.23	53.61	37.88	21.65	21.96	20.3	1.18909	2.7061e-14	rutD	XP_012852156.1 PREDICTED: uncharacterized protein LOC105971805 [Erythranthe guttata]
Unigene0012861	4.21	4.52	5.1	1.95	2.08	1.62	1.29148	2.76794e-14	TEB	XP_012857830.1 PREDICTED: helicase and polymerase-containing protein TEBICHI isoform X1 [Erythranthe guttata]
Unigene0011060	0.3	0.54	0.46	4.48	6.03	4.69	-3.54749	2.76794e-14	WIP2	XP_011080270.1 zinc finger protein WIP2-like [Sesamum indicum]
Unigene0004189	1.11	1.64	1.13	6.64	8.29	11.67	-2.7773	2.92425e-14	CYP704C1	XP_011076303.1 cytochrome P450 704C1 [Sesamum indicum]
Unigene0000129	32.63	28.09	26.28	14.36	15.55	13.01	1.01937	2.93715e-14	CAC3	AIU99501.1 Carboxyltransferase alpha subunit of Heteromeric ACCase [Salvia miltiorrhiza]
Unigene0022996	0.08	0.09	0.32	9.12	10.8	5.9	-5.71956	2.97281e-14	PRA1F3	KZV29644.1 hypothetical protein F511_00922 [Dorcoceras hygrometricum]
Unigene0024758	1.43	0.4	1.47	12.94	13.21	12.63	-3.55477	3.08211e-14	--	XP_020551966.1 uncharacterized protein LOC110012466 [Sesamum indicum]
Unigene0028270	3.69	5.06	2.51	0.03	0.12	0	6.2301	3.20915e-14	WRKY48	KZV42754.1 putative WRKY transcription factor 48 [Dorcoceras hygrometricum]
Unigene0025720	0.39	1.12	1.55	14.16	10.41	11.42	-3.55599	3.22505e-14	--	TEY71844.1 hypothetical protein Saspl_001288 [Salvia splendens]
Unigene0007183	466.56	366.56	369.56	179.2	163.03	213.06	1.11494	3.31365e-14	EXPA1	XP_012839202.1 PREDICTED: expansin-A11-like [Erythranthe guttata]
Unigene0021521	8.76	9.32	5.67	0.98	0.39	0.51	3.65912	3.36001e-14	--	PIN23631.1 MADS box transcription factor [Handroanthus impetiginosus]
Unigene0007740	5.56	7.73	19.12	0	0	0	13.3992	3.63572e-14	--	XP_021687395.1 uncharacterized protein LOC110669864 [Hevea brasiliensis]
Unigene0030680	65.73	90.84	53.86	21.77	26.55	29.13	1.442	3.71031e-14	--	XP_022875124.1 protein jagged-1-like isoform X1 [Olea europaea var. sylvestris] [Olea europaea]
Unigene0030796	0.05	0.2	0.09	8.87	3.78	9.28	-6.01123	3.76355e-14	CSP41B	XP_011092178.1 chloroplast stem-loop binding protein of 41 kDa b, chloroplastic [Sesamum indicum]
Unigene0034838	3.81	4.17	5.79	17.02	20.98	22.17	-2.12752	3.95458e-14	--	XP_022138921.1 uncharacterized protein LOC111009981 [Momordica charantia]
Unigene0008882	3.28	4.93	5.54	17.07	16.04	15.51	-1.82212	3.9717e-14	PSAT	XP_016502298.1 PREDICTED: phospholipid--sterol O-acyltransferase-like [Nicotiana tabacum]
Unigene0025003	0.08	0	0.07	18.97	17.65	22.29	-8.61741	4.01265e-14	MLP28	XP_011075467.2 kirola-like [Sesamum indicum]
Unigene0025604	0.28	0.55	0.57	6.88	4.87	5.67	-3.63725	4.07736e-14	TLP1	TEY89365.1 hypothetical protein Saspl_007968 [Salvia splendens]
Unigene0003563	125.36	126.71	221.81	56.67	44.29	40.29	1.74627	4.15391e-14	--	-
Unigene0029468	15.53	30.46	20.58	5.14	4.95	7.42	1.92669	4.194e-14	--	PIN13112.1 hypothetical protein CDL12_14266 [Handroanthus impetiginosus]
Unigene0032904	44.82	57.47	70.15	23.67	26.76	26.57	1.16316	4.23452e-14	HIPP06	XP_022889286.1 heavy metal-associated isoprenylated plant protein 3-like, partial [Olea europaea var. sylvestris] [Olea europaea]
Unigene0007045	21.46	31.87	19.69	83.45	92.13	127.63	-2.05395	4.2689e-14	ERD15	XP_011078934.2 protein EARLY RESPONSIVE TO DEHYDRATION 15 isoform X1 [Sesamum indicum]
Unigene0000360	0	0.07	0.19	8.19	5.04	6.79	-6.26679	4.36787e-14	UGT29	XP_011090910.1 beta-D-glucosyl crocetin beta-1,6-glucosyltransferase-like [Sesamum indicum]
Unigene0014416	0.97	1.77	1.62	8.79	6.73	8.13	-2.43944	4.65161e-14	At5g17760	XP_011083190.1 AAA-ATPase At3g50940-like [Sesamum indicum]
Unigene0007143	15.99	14.77	16.8	38.55	35.58	37.39	-1.22948	4.7005e-14	SRF6	PIN13734.1 Serine/threonine protein kinase [Handroanthus impetiginosus]
Unigene0027589	18.75	24.26	11.71	74.65	97.38	98.84	-2.30746	4.88081e-14	BRH1	XP_004245579.1 E3 ubiquitin-protein ligase RHA1B [Solanum lycopersicum]
Unigene0018630	0.42	0.23	0.2	4.1	4.27	4.17	-3.88293	4.97747e-14	WEE1	PIN05369.1 Cyclin-dependent kinase WEE1 [Handroanthus impetiginosus]
Unigene0030691	13.84	13.3	16.07	40.58	37.7	43.49	-1.49472	4.99973e-14	--	XP_011088218.1 adhesive plaque matrix protein [Sesamum indicum]
Unigene0026778	6.91	5.96	7.06	19.22	17.5	19.09	-1.48558	5.20198e-14	PHT4;4	XP_011093131.1 ascorbate transporter, chloroplastic [Sesamum indicum]
Unigene0005839	12.01	10.75	20.26	87.84	84.4	57.95	-2.41975	5.2995e-14	HXK1	XP_011093636.1 hexokinase-1 [Sesamum indicum]
Unigene0009703	4.46	6.05	5.17	2.12	1.65	1.89	1.47005	5.49858e-14	R1A-10	XP_011091064.1 putative late blight resistance protein homolog R1B-16 [Sesamum indicum]
Unigene0024696	0.17	0.21	0.24	2.7	2.24	2.9	-3.66051	5.52177e-14	FTIP1	XP_011078852.1 FT-interacting protein 1 [Sesamum indicum]
Unigene0026391	3.64	4.64	3.35	13.05	12.94	10.48	-1.64886	5.60963e-14	CALS11	XP_011096305.1 callose synthase 11 [Sesamum indicum]
Unigene0030699	13.96	17.83	13.04	39.06	45.67	44.01	-1.52192	5.74554e-14	DHRS12	XP_011100640.1 dehydrogenase/reductase SDR family member 12 [Sesamum indicum]
Unigene0031220	0.11	0	0.35	11.66	12.54	9.29	-6.18595	5.78734e-14	SAUR50	PIM97452.1 hypothetical protein CDL12_30078 [Handroanthus impetiginosus]
Unigene0019068	0.87	0.98	0.64	4.89	4.39	5.47	-2.5665	5.88618e-14	GK-2	KZV14499.1 guanylate kinase 2 [Dorcoceras hygrometricum]
Unigene0026713	1.55	2.51	1.68	8.48	10.17	10.69	-2.35375	5.90224e-14	DOF3.7	XP_011075948.1 dof zinc finger protein DOF4.6-like [Sesamum indicum]
Unigene0010537	7.46	17.16	7.59	0.66	0.16	0	5.29574	6.1146e-14	DIR2	XP_022852115.1 dirigent protein 21-like [Olea europaea var. sylvestris] [Olea europaea]
Unigene0025518	7.51	8.41	12.13	37.7	35.61	36.98	-1.97523	6.13962e-14	RPS11	XP_011089695.1 40S ribosomal protein S11 [Sesamum indicum]
Unigene0014287	2.05	1.99	2.31	13.8	11.6	14.14	-2.63848	6.16471e-14	--	PIN06732.1 Macrophage migration inhibitory factor [Handroanthus impetiginosus]
Unigene0003761	3.75	6.56	10.98	0.93	0.44	0.69	3.36946	6.16565e-14	--	KJB52249.1 hypothetical protein B456_008G252000 [Gossypium raimondii]
Unigene0036134	2.14	2.06	2.7	0.49	0.61	0.29	2.31151	6.22235e-14	GIP	KZV56298.1 hypothetical protein F511_00295 [Dorcoceras hygrometricum]
Unigene0033484	46.26	43.55	47.45	99.09	93.38	103.39	-1.108	6.27342e-14	PCKA	XP_012832610.1 PREDICTED: phosphoenolpyruvate carboxykinase [ATP]-like [Erythranthe guttata]
Unigene0020804	0.25	0.51	0.42	4.2	4.42	3.71	-3.38531	6.30095e-14	EFM	PIN11162.1 hypothetical protein CDL12_16241 [Handroanthus impetiginosus]
Unigene0032371	52.26	54.28	49.31	119.57	108.09	131.41	-1.20411	6.31534e-14	PAT07	XP_012844033.1 PREDICTED: probable protein S-acyltransferase 7 [Erythranthe guttata]
Unigene0005374	8.63	11.4	11.76	28.73	31.62	29.25	-1.49493	6.35569e-14	GGPS1	XP_011097207.1 geranylgeranyl pyrophosphate synthase, chloroplastic [Sesamum indicum]
Unigene0000643	9.4	16.1	8.68	0.15	0.33	1.25	4.30431	6.96137e-14	LBD25	KZV19366.1 protein LATERAL ORGAN BOUNDARIES-like [Dorcoceras hygrometricum]
Unigene0001494	2.48	2.68	2.51	0.69	0.4	0.32	2.44353	6.96387e-14	wdr48	KAB5529397.1 hypothetical protein DKX38_019478 [Salix brachista]
Unigene0026618	8.76	10.92	8.66	1.18	0.63	2.25	2.80329	7.09311e-14	SAPK1	XP_025691110.1 serine/threonine-protein kinase SAPK1 isoform X1 [Arachis hypogaea]
Unigene0029024	2.77	2.92	2.34	9.8	8.55	9.89	-1.81427	7.13184e-14	--	PIN18708.1 Lycopene beta-cyclase [Handroanthus impetiginosus]
Unigene0014268	11.71	13.34	12.98	32.24	30.06	38.7	-1.40915	7.14281e-14	PRO4	XP_010915372.1 profilin isoform X1 [Elaeis guineensis]
Unigene0013910	10.22	10.46	12.87	4.1	2.6	2.34	1.89192	7.33875e-14	AIP1	PIN05286.1 Serine/threonine protein phosphatase [Handroanthus impetiginosus]
Unigene0009877	16.68	19.01	16.4	44.89	38.67	44.52	-1.29797	7.37072e-14	GSA	PIN26217.1 Acetylornithine aminotransferase [Handroanthus impetiginosus]
Unigene0002873	0	0	0	6.18	4.33	4.92	-12.3285	7.39159e-14	JKD	XP_011089318.1 protein indeterminate-domain 9 [Sesamum indicum]
Unigene0028402	0.08	0	0	32.41	23.79	19.33	-9.88283	7.68185e-14	EARLI1	TEY17046.1 hypothetical protein Saspl_053668 [Salvia splendens]
Unigene0006188	1.38	0.8	3.17	24.1	22.79	16.14	-3.55843	8.19336e-14	LPR1	XP_011075722.2 multicopper oxidase LPR1 [Sesamum indicum]
Unigene0002284	0.14	0.22	0.49	11.35	5.23	5.09	-4.67209	8.19442e-14	--	XP_011094954.1 L-type lectin-domain containing receptor kinase VIII.2-like [Sesamum indicum]
Unigene0036069	0.27	0.62	1.05	6.77	6.07	7.4	-3.38308	8.26329e-14	--	XP_012849287.1 PREDICTED: uncharacterized protein LOC105969097 [Erythranthe guttata]
Unigene0031842	2.25	2.73	3.55	0.38	0.56	0.48	2.58665	8.35411e-14	ManS	XP_011094610.1 mannan synthase 1-like [Sesamum indicum]
Unigene0031265	115.55	90.98	123.46	48.72	37.12	52.81	1.25097	8.59806e-14	--	KZV37227.1 hypothetical protein F511_25025, partial [Dorcoceras hygrometricum]
Unigene0027021	66	99.45	50.54	20.23	22.66	25.59	1.65721	8.64904e-14	DDB_G0268948	XP_011078956.2 putative methyltransferase DDB_G0268948 isoform X1 [Sesamum indicum]
Unigene0032525	1.37	2.26	1.59	9.29	7.73	9.51	-2.3455	8.67169e-14	ATAB2	PIN14086.1 hypothetical protein CDL12_13290 [Handroanthus impetiginosus]
Unigene0000790	6.14	6.83	7.97	2.15	2.72	1.8	1.6505	8.67169e-14	GGT3	XP_011093665.1 gamma-glutamyltranspeptidase 3 isoform X1 [Sesamum indicum]
Unigene0015668	95.71	209.39	131.65	25.96	31.6	46.4	2.07078	8.82672e-14	--	XP_011096991.1 uncharacterized protein LOC105176019 isoform X1 [Sesamum indicum]
Unigene0035404	0.31	0.19	0.26	15.64	12.86	25.02	-6.13793	8.84722e-14	--	XP_011099256.1 uncharacterized protein LOC105177716 [Sesamum indicum]
Unigene0006714	2.36	2.57	2.11	14.56	10.66	14.2	-2.48528	8.99797e-14	PSAH	GER48344.1 photosystem I reaction center subunit VI [Striga asiatica]
Unigene0032081	9.66	11.64	12.61	35.19	28.29	35.82	-1.55008	9.20482e-14	FLCY	XP_012857575.1 PREDICTED: farnesylcysteine lyase [Erythranthe guttata]
Unigene0003652	6.87	9.45	9.02	1.06	1.74	1.8	2.46171	9.57252e-14	--	-
Unigene0019267	10.67	12.72	11.31	30.34	27.23	29.12	-1.32093	9.6277e-14	--	XP_011078830.1 uncharacterized protein LOC105162498 [Sesamum indicum]
Unigene0017046	3.78	4.5	4.62	0.62	0.54	0.46	2.99331	1.03474e-13	--	XP_011071106.1 uncharacterized protein LOC105156620 [Sesamum indicum]
Unigene0033442	2.38	2.83	3.68	13.22	11.93	11.74	-2.05297	1.06194e-13	RCCR	AHZ35335.1 red chlorophyll catabolite reductase [Picrorhiza kurrooa]
Unigene0032129	2.86	2.06	3.29	18.63	18.97	13.48	-2.6373	1.08628e-13	--	PIN07292.1 hypothetical protein CDL12_20147 [Handroanthus impetiginosus]
Unigene0003940	1.49	1.16	1.51	8.01	8.52	6.97	-2.49801	1.08721e-13	UBA1C	PIM98552.1 Cell growth-regulating nucleolar protein [Handroanthus impetiginosus]
Unigene0000186	7.83	9.33	10.64	0.74	1.94	1.84	2.62069	1.09147e-13	HCF152	XP_019255235.1 PREDICTED: putative pentatricopeptide repeat-containing protein At1g12700, mitochondrial [Nicotiana attenuata]
Unigene0025429	4.09	3.71	2.46	0.12	0.21	0.04	4.79336	1.09538e-13	--	PIN04097.1 putative hydrolase/acyltransferase (alpha/beta hydrolase superfamily) [Handroanthus impetiginosus]
Unigene0011643	0.59	1.05	0.65	5.1	5.27	5.8	-2.8199	1.09777e-13	PRFB3	PIN20076.1 Mitochondrial polypeptide chain release factor [Handroanthus impetiginosus]
Unigene0029002	16.81	17.36	13.75	8.23	7.01	8.39	1.02001	1.14915e-13	APUM5	XP_020553414.1 pumilio homolog 5-like isoform X2 [Sesamum indicum]
Unigene0033773	0.15	1.03	0.64	7.43	11.13	14.13	-4.16684	1.15191e-13	--	XP_011096355.1 uncharacterized protein LOC105175570 [Sesamum indicum]
Unigene0004554	6.83	11.2	7.03	1.78	1.86	1.87	2.18526	1.15838e-13	NUDT25	XP_022876980.1 nudix hydrolase 25-like [Olea europaea var. sylvestris] [Olea europaea]
Unigene0032603	4.3	4.48	11.81	0.36	0.57	0.65	3.70395	1.17365e-13	--	XP_011080407.1 uncharacterized protein LOC105163665 [Sesamum indicum]
Unigene0031365	12.14	11.22	15.7	4.63	5.52	5.26	1.34183	1.17515e-13	At1g65240	XP_011089980.1 aspartic proteinase-like protein 2 isoform X1 [Sesamum indicum]
Unigene0012187	12.01	22.66	8.28	0.99	1.72	2.21	3.12593	1.2088e-13	AZF3	PSR99903.1 Zinc finger protein [Actinidia chinensis var. chinensis] [Actinidia chinensis]
Unigene0004721	4.77	4.53	7.34	33.99	28.94	20.71	-2.32954	1.21183e-13	ICR3	XP_011089861.2 interactor of constitutive active ROPs 3 [Sesamum indicum]
Unigene0008526	59.16	89.97	63.7	15.86	19.82	29.56	1.70587	1.26824e-13	SKIP25	XP_011074258.1 F-box/kelch-repeat protein SKIP25 [Sesamum indicum]
Unigene0032014	0	0	0	12.76	11.45	14.29	-13.6476	1.29279e-13	--	PIN19581.1 hypothetical protein CDL12_07748 [Handroanthus impetiginosus]
Unigene0025652	0.09	0.16	0	5.73	5.85	3.51	-5.91552	1.29556e-13	RCA1	PIN17082.1 hypothetical protein CDL12_10274 [Handroanthus impetiginosus]
Unigene0013657	4.35	4.05	5.15	15.05	12.62	15.41	-1.66873	1.30585e-13	TBR	XP_011075105.1 protein trichome birefringence [Sesamum indicum]
Unigene0026623	0.72	1.42	0.67	6.11	5.29	7.07	-2.71654	1.30835e-13	At2g32560	PIM99281.1 hypothetical protein CDL12_28233 [Handroanthus impetiginosus]
Unigene0016174	12.66	17.83	8.1	62.66	57.08	78.95	-2.36422	1.31816e-13	--	XP_011094441.1 uncharacterized protein LOC105174138 [Sesamum indicum]
Unigene0024372	11.6	13.23	12.81	30.29	30.14	28.01	-1.23243	1.32264e-13	At2g38610	PON45602.1 Polyribonucleotide nucleotidyltransferase [Trema orientale]
Unigene0018562	24.13	20.27	28.57	11.65	9.22	8.71	1.30268	1.45655e-13	fray2	TEY39165.1 serine/threonine-protein kinase OSR1/STK39 [Salvia splendens]
Unigene0007931	8.21	8.53	8.21	2.39	2	2.72	1.81112	1.47727e-13	--	GER43228.1 phosphatidylinositol-4-phosphate 5-kinase family protein [Striga asiatica]
Unigene0034680	79.88	38.77	72.94	428.46	482.54	280.42	-2.63659	1.53113e-13	At3g16190	XP_011080698.1 probable inactive nicotinamidase At3g16190 [Sesamum indicum]
Unigene0036399	1.24	1.99	1.95	7.67	14.83	17.92	-2.96405	1.54559e-13	SCPL18	XP_012836843.1 PREDICTED: serine carboxypeptidase-like 18 [Erythranthe guttata]
Unigene0029650	8.01	6.72	11.71	35.65	31.1	36.16	-1.96059	1.59629e-13	LNG2	XP_011072881.1 protein LONGIFOLIA 1 [Sesamum indicum]
Unigene0034611	0.39	0.35	0.22	6.16	2.7	6.17	-3.96867	1.65073e-13	ADPG2	XP_011086585.1 polygalacturonase At1g48100 [Sesamum indicum]
Unigene0017634	1.03	1.11	1.14	5.85	4.06	6.11	-2.28811	1.65807e-13	--	XP_011075966.1 myosin heavy chain, striated muscle [Sesamum indicum]
Unigene0007662	1.62	2.11	2.02	5.85	6.06	6.85	-1.70603	1.65995e-13	--	XP_011097491.1 uncharacterized protein LOC105176404 [Sesamum indicum]
Unigene0003086	20.71	17.91	20.72	7.14	7.66	9.47	1.28983	1.70398e-13	--	-
Unigene0030626	47.88	58.28	41.39	21.84	20.77	26.84	1.08716	1.70631e-13	NFYB3	CDY46752.1 BnaA03g16960D [Brassica napus]
Unigene0031542	7.82	8.27	5.78	1.86	1.86	1.25	2.13764	1.72889e-13	HPR3	XP_011081063.1 glyoxylate/hydroxypyruvate reductase HPR3 [Sesamum indicum]
Unigene0003759	163.43	117.13	141.35	65.82	72.32	64.84	1.0556	1.73344e-13	sec14	PIN01439.1 hypothetical protein CDL12_26049 [Handroanthus impetiginosus]
Unigene0003070	1967.68	1634.14	1342.07	677.09	795.98	786.95	1.12931	1.73979e-13	CHS	BAC87863.1 chalcone synthase [Torenia hybrid cultivar]
Unigene0031956	5.2	5.56	6.75	1.48	1.89	2.04	1.69448	1.76817e-13	HEXO2	XP_011086777.1 beta-hexosaminidase 2 isoform X1 [Sesamum indicum]
Unigene0027009	4.71	8.43	2.18	0.07	0	0.16	6.05764	1.77757e-13	DCR	XP_011076731.1 uncharacterized acetyltransferase At3g50280-like [Sesamum indicum]
Unigene0005232	4.06	4.06	3.43	13.6	14.99	12.13	-1.81784	1.96569e-13	PAT08	XP_011101211.1 protein S-acyltransferase 8 [Sesamum indicum]
Unigene0026727	9.62	16.93	14.62	4.75	3.86	4.44	1.65754	1.9923e-13	AFP2	XP_011089656.1 AFP homolog 2-like [Sesamum indicum]
Unigene0016847	6.85	6.3	10.08	27.06	29.46	27.4	-1.85303	1.99868e-13	At3g58610	TEY37532.1 ketol-acid reductoisomerase [Salvia splendens]
Unigene0012878	1.55	0.68	0.35	16.42	12.94	23.46	-4.35564	2.04084e-13	UPB1	XP_018842308.1 PREDICTED: transcription factor UPBEAT1 [Juglans regia]
Unigene0033422	0.09	0.28	0.35	3.49	4.55	5.8	-4.2647	2.0663e-13	--	XP_011071129.1 uncharacterized protein LOC105156631 [Sesamum indicum]
Unigene0026499	12.7	9.25	13.43	2.67	2.35	3.22	2.10222	2.08241e-13	ERF008	XP_022846100.1 ethylene-responsive transcription factor ERF011-like [Olea europaea var. sylvestris] [Olea europaea]
Unigene0012537	4.58	6.17	4.93	14.36	15.59	18.61	-1.63084	2.25425e-13	BAK1	XP_012828417.1 PREDICTED: BRASSINOSTEROID INSENSITIVE 1-associated receptor kinase 1 [Erythranthe guttata]
Unigene0010694	9.49	9.71	4.63	0.49	0.53	0.55	3.92394	2.2737e-13	--	-
Unigene0001222	11.88	14.57	18.35	45.62	43.69	41.94	-1.55075	2.29223e-13	TPR1	XP_011081522.1 protein TPR3-like isoform X4 [Sesamum indicum]
Unigene0028474	145.82	170.71	166.67	67.45	61.19	94.57	1.11422	2.32755e-13	ADC1	PIN12738.1 Arginine decarboxylase [Handroanthus impetiginosus]
Unigene0021482	0	0	0	6.54	7.2	4.15	-12.5419	2.36275e-13	At1g48100	XP_011086585.1 polygalacturonase At1g48100 [Sesamum indicum]
Unigene0009623	16.78	21.94	12.22	60.46	58.56	69.48	-1.88769	2.37244e-13	ATPC	XP_007026083.1 PREDICTED: ATP synthase gamma chain, chloroplastic [Theobroma cacao]
Unigene0008804	12.87	11.4	6.45	0.3	1.03	0.55	4.03037	2.40262e-13	DTM1	PIN08132.1 hypothetical protein CDL12_19299 [Handroanthus impetiginosus]
Unigene0000812	0.33	0.08	0.05	5	6.12	6.7	-5.27572	2.40356e-13	--	GER53446.1 hypothetical protein STAS_30956 [Striga asiatica]
Unigene0011685	100.67	119.34	71.7	342.93	313.19	441.78	-1.91214	2.47912e-13	RAP2-2	XP_011072679.1 ethylene-responsive transcription factor RAP2-12-like isoform X1 [Sesamum indicum]
Unigene0026421	4.2	3.71	9.87	35.51	56.37	48.41	-2.98008	2.48285e-13	KIN14G	XP_011092110.1 kinesin-like protein KIN-14I [Sesamum indicum]
Unigene0019116	20.31	18.68	14.94	8.1	7.84	7.94	1.17529	2.52113e-13	TOM1	XP_011086184.1 tobamovirus multiplication protein 1 [Sesamum indicum]
Unigene0006242	0.22	0	0.63	38.37	35.59	32.91	-6.97418	2.5393e-13	--	TEY19457.1 hypothetical protein Saspl_049087 [Salvia splendens]
Unigene0024885	1.15	1.1	0.89	5.13	6.24	5.58	-2.43245	2.5701e-13	RER1	GER54390.1 hypothetical protein STAS_31967 [Striga asiatica]
[truncated: 3,983 more rows]

## Sheet: Up
Significantly up-regulated DEGs identified as those with LogFC > 1
reference_id	stigma_1	stigma_2	stigma_3	style_1	style_2	style_3	logfc	FDR	symbol	Description
Unigene0035676	993.86	975.43	1128.67	16.24	15.74	13.18	6.10013	0	MLP34	XP_012846588.1 PREDICTED: MLP-like protein 423 [Erythranthe guttata]
Unigene0025097	75.67	79.45	92.12	1.78	2.25	1.99	5.36	1.45345e-231	TCP13	XP_011099021.1 transcription factor TCP5-like [Sesamum indicum]
Unigene0033481	152.56	172.88	159.1	14.46	16.13	13.51	3.45777	1.09332e-228	--	XP_011074612.1 uncharacterized protein LOC105159292 isoform X2 [Sesamum indicum]
Unigene0015062	224.74	233.3	212.93	0.45	1.28	0.55	8.20107	2.9127e-221	EXPA7	XP_011077647.2 expansin-A6-like [Sesamum indicum]
Unigene0011542	3899.23	3211.16	3879.34	45.84	61.23	35.24	6.27098	5.14115e-193	MSL6	PIN02392.1 putative mechanosensitive ion channel [Handroanthus impetiginosus]
Unigene0028998	47.26	49.73	41.83	1.81	2.18	1.55	4.64719	7.00115e-189	--	XP_012835035.1 PREDICTED: paladin [Erythranthe guttata]
Unigene0027645	123.2	132.06	138.2	23.01	22.46	21.3	2.55895	1.05477e-182	--	PIN01755.1 hypothetical protein CDL12_25736 [Handroanthus impetiginosus]
Unigene0017954	378.7	334.44	399.66	9.1	9.72	6.1	5.48075	2.38723e-180	SKOR	XP_020551503.1 potassium channel SKOR-like [Sesamum indicum]
Unigene0031350	239.87	192.87	212.52	7.26	5.94	8.19	4.91487	4.45189e-178	AGL12	XP_011095942.1 agamous-like MADS-box protein AGL12 isoform X1 [Sesamum indicum]
Unigene0036412	191.06	205.04	188.55	40.88	43.33	42.26	2.20878	3.35199e-175	CRPK1	XP_011094993.1 putative serine/threonine-protein kinase [Sesamum indicum]
Unigene0030629	48.08	47.94	44.03	1.07	1.53	1.1	5.24227	1.51785e-174	At4g12980	PSR94965.1 Cytochrome b561 and DOMON domain-containing protein [Actinidia chinensis var. chinensis] [Actinidia chinensis]
Unigene0011272	182.59	223.84	130.86	1.15	1.5	1.75	6.93205	3.90205e-165	SWEET16	XP_011092096.1 bidirectional sugar transporter SWEET16 [Sesamum indicum]
Unigene0028840	4285.71	4732.64	3437.18	268.6	306.63	296.65	3.83651	3.42897e-163	--	XP_010538465.1 PREDICTED: glycine-rich RNA-binding protein GRP2A [Tarenaya hassleriana]
Unigene0034471	173.98	177.25	167.08	27.16	30.49	29.77	2.56778	2.48678e-160	At5g03795	XP_011094445.1 probable glycosyltransferase At5g03795 [Sesamum indicum]
Unigene0004241	40.63	41.94	40.86	6.18	6.38	6.74	2.67702	7.98146e-160	PAD4	XP_011099680.1 lipase-like PAD4 [Sesamum indicum]
Unigene0000514	796.09	723.75	890.56	90.64	90.44	98.62	3.10732	5.89112e-154	AAP3	KZV23195.1 hypothetical protein F511_05034 [Dorcoceras hygrometricum]
Unigene0025977	30.91	37.16	31.67	1.94	2.11	2.24	3.98704	2.44717e-153	ARR3	XP_020547775.1 two-component response regulator ARR3-like isoform X2 [Sesamum indicum]
Unigene0029866	109.73	99.67	122.19	3.7	5.33	4.46	4.61944	4.05011e-153	Os04g0179200	KZV28422.1 tropinone reductase-like 1 [Dorcoceras hygrometricum]
Unigene0025198	69.12	81.72	68.62	7.51	8.74	8.26	3.16252	5.39078e-153	GATA8	PIN15057.1 hypothetical protein CDL12_12320 [Handroanthus impetiginosus]
Unigene0024117	151.67	124.46	107.08	1.07	1.9	1.04	6.57839	2.65378e-152	DDS	XP_011096562.1 dammarenediol II synthase-like [Sesamum indicum]
Unigene0009718	76.01	82.24	81.52	12.4	11.01	10.68	2.81423	2.15734e-151	GLO5	XP_021293864.1 peroxisomal (S)-2-hydroxy-acid oxidase isoform X2 [Herrania umbratica]
Unigene0031805	1115.58	879.82	1236.79	23.26	34.03	23.07	5.32989	1.45325e-148	C/VIF2	XP_011099754.1 cell wall / vacuolar inhibitor of fructosidase 2 [Sesamum indicum]
Unigene0032703	67.43	67.02	64.42	2.28	2.15	2.19	4.90885	2.78313e-141	--	XP_011086360.1 uncharacterized protein LOC105168112 [Sesamum indicum]
Unigene0000691	1277.22	1249.7	1312.09	204.17	174.21	212.65	2.69943	8.16115e-137	APS1	XP_011080101.1 acid phosphatase 1 [Sesamum indicum]
Unigene0028959	78.82	80.47	58.92	1.82	2.41	1.74	5.19184	1.60281e-135	--	EYU33519.1 hypothetical protein MIMGU_mgv1a005341mg [Erythranthe guttata]
Unigene0014158	124.02	142.79	144.74	26.92	29.12	26.49	2.31808	5.2598e-135	--	-
Unigene0033335	129.35	101.78	95.74	3.99	5.13	3.96	4.64328	4.31362e-133	NPF8.1	XP_028098706.1 protein NRT1/ PTR FAMILY 8.1-like [Camellia sinensis]
Unigene0015285	75.68	101.24	81.06	4.58	5.53	5.1	4.08417	1.52131e-131	--	XP_009143294.1 uncharacterized protein LOC103867019 [Brassica rapa]
Unigene0013457	228.36	220.58	230.57	46.86	51.53	48.02	2.21448	2.50548e-130	BHLH75	XP_011078318.2 transcription factor bHLH75 [Sesamum indicum]
Unigene0031561	203.42	267.76	143.52	3.95	4.81	4.16	5.5722	2.0726e-127	ERF5	PIN17894.1 hypothetical protein CDL12_09442 [Handroanthus impetiginosus]
Unigene0003648	225.74	257.78	271.22	44.9	41.37	41.92	2.5577	3.50963e-127	--	PIM98219.1 hypothetical protein CDL12_29304 [Handroanthus impetiginosus]
Unigene0025047	124.78	122.45	140.44	5.93	6.89	9.37	4.12685	1.78122e-122	UPTG1	XP_011073091.1 UDP-arabinopyranose mutase 1 [Sesamum indicum]
Unigene0033963	124.1	140.33	118.29	27.05	24.5	26.28	2.29789	5.09223e-120	AHK4	XP_011070524.1 histidine kinase 4 [Sesamum indicum]
Unigene0000193	17738.5	14132.2	15523.8	1869.59	1991.03	1918.53	3.03579	6.28878e-120	LSAT_1X82001	XP_012831856.1 PREDICTED: non-specific lipid-transfer protein 1-like [Erythranthe guttata]
Unigene0026308	28.1	24.59	27.57	1.84	2.2	1.7	3.80556	1.42577e-119	--	XP_020554614.1 uncharacterized protein LOC105178381 [Sesamum indicum]
Unigene0018378	89.87	73.63	70.14	1.76	1.66	1.76	5.49519	4.18004e-119	--	PIM97908.1 hypothetical protein CDL12_29617 [Handroanthus impetiginosus]
Unigene0025706	217.26	183.06	206.68	26.63	26.73	25.03	2.95295	1.20007e-118	--	XP_012856838.1 PREDICTED: uncharacterized protein LOC105976094 [Erythranthe guttata]
Unigene0035247	99.94	105.56	72.19	3.66	3.23	4.3	4.63319	7.90311e-118	OSM34	XP_011081000.1 protein P21 [Sesamum indicum]
Unigene0013057	188.56	188.64	195.87	20.69	23.9	27.62	2.98844	1.39003e-117	--	PIN17818.1 hypothetical protein CDL12_09522 [Handroanthus impetiginosus]
Unigene0012553	579.18	550.15	517.02	93.56	108.04	102.35	2.43737	6.31627e-116	At1g75040	XP_020551116.1 uncharacterized protein LOC105166296 [Sesamum indicum]
Unigene0019909	66.21	75.54	49.34	0.59	0.92	0.38	6.65972	1.35644e-114	AMT1-1	TEY27957.1 ammonium transporter, Amt family [Salvia splendens]
Unigene0018581	81.96	97.46	95.59	17.15	14.61	15.06	2.55429	1.92481e-114	CPK13	XP_011077546.1 calcium-dependent protein kinase 13 [Sesamum indicum]
Unigene0000205	80.41	63.41	57.5	1.15	1.3	0.73	5.98432	5.10214e-114	DDS	AWM98359.1 beta-amyrin synthase [Osmanthus fragrans]
Unigene0013627	6.16	7.68	6.3	0.26	0.34	0.25	4.56646	1.54849e-113	pol	XP_012852936.1 PREDICTED: uncharacterized protein LOC105972521 [Erythranthe guttata]
Unigene0009155	78.39	74.97	57.2	2.41	2.77	2.94	4.69661	4.73606e-113	LFG4	GER24865.1 bax inhibitor-1 family protein [Striga asiatica]
Unigene0034658	115.73	96.93	145.11	1.72	2.39	1.04	6.11832	1.05368e-112	CYP76T24	XP_012845111.1 PREDICTED: geraniol 8-hydroxylase-like [Erythranthe guttata]
Unigene0032860	34.3	43.18	48.24	0.39	0.68	0.21	6.61793	1.37901e-110	WRKY6	XP_011096037.1 WRKY transcription factor 6 [Sesamum indicum]
Unigene0031034	134.48	152.87	115.86	17.88	18.49	18.55	2.87613	1.58533e-110	HEC3	XP_027077794.1 transcription factor HEC3-like [Coffea arabica]
Unigene0000364	8318.29	6638.27	9290.57	737.47	811.41	830.8	3.34897	3.18482e-108	SBT4.15	PIN16828.1 Cucumisin [Handroanthus impetiginosus]
Unigene0008076	20481.7	18576.6	17535.9	1730	1979.41	2371.99	3.21818	5.86506e-108	LTP6	XP_011095136.1 non-specific lipid-transfer protein-like [Sesamum indicum]
Unigene0032876	71.2	63.56	88.89	0.38	0.66	0.24	7.44896	7.42274e-108	--	XP_011088564.1 uncharacterized protein LOC105169758 [Sesamum indicum]
Unigene0035544	43.4	42.67	31.47	0.98	1.44	1.12	5.05326	1.02439e-107	CYP86A22	XP_011072860.1 cytochrome P450 86A22 [Sesamum indicum]
Unigene0008144	181.75	221.79	114.96	1.37	1.11	0.45	7.4673	2.27595e-104	IPT1	GER44395.1 adenylate isopentenyltransferase [Striga asiatica]
Unigene0020057	54.2	46.13	50.16	7.77	7.67	6.96	2.7481	2.34479e-103	At4g27290	XP_011095279.2 G-type lectin S-receptor-like serine/threonine-protein kinase At4g27290 [Sesamum indicum]
Unigene0032436	87.28	96.61	96.32	21.07	17.2	18.84	2.29469	2.61579e-103	At4g18820	XP_011085319.1 protein STICHEL-like 4 [Sesamum indicum]
Unigene0031273	73.17	79.06	67.59	4.36	5.02	2.93	4.15842	1.03824e-102	HMG3	GER36654.1 3-hydroxy-3-methylglutaryl-coenzyme A reductase [Striga asiatica]
Unigene0003926	20.17	17.15	26.3	1.01	0.99	1.17	4.32693	2.23399e-102	CYP85A1	AJD25206.1 cytochrome P450 CYP85A1 [Salvia miltiorrhiza]
Unigene0022837	42.1	43.52	41.07	6.71	5.36	6.44	2.77493	3.2555e-101	At1g66480	PIN25996.1 hypothetical protein CDL12_01275 [Handroanthus impetiginosus]
Unigene0029885	786.61	792.23	561.76	28.73	44.58	38.18	4.26303	3.14963e-99	pvadh	XP_011098591.2 uncharacterized protein LOC105177224 [Sesamum indicum]
Unigene0028582	19.73	18.8	17.26	2.03	2.42	2.16	3.07728	4.42806e-98	KIN8B	PIN00348.1 Kinesin-like protein [Handroanthus impetiginosus]
Unigene0032677	19.93	19.33	19.92	0.67	0.88	0.88	4.60608	4.63444e-98	JGB	TEY92740.1 hypothetical protein Saspl_016002 [Salvia splendens]
Unigene0012777	49.44	39.14	57.49	1.33	1.87	1.26	5.03347	9.44466e-98	HPAT3	XP_011080408.1 hydroxyproline O-arabinosyltransferase 3 [Sesamum indicum]
Unigene0027237	37.74	35.61	36.93	7.38	6.56	6.36	2.44162	9.37113e-97	LECRKS2	XP_011091433.1 receptor like protein kinase S.2 [Sesamum indicum]
Unigene0026559	18.38	24.22	22.99	2.42	2.76	2.97	3.0086	1.42224e-96	TRM32	XP_020553381.1 uncharacterized protein LOC105174401 isoform X1 [Sesamum indicum]
Unigene0009680	633.45	769.01	439.36	29.79	36.32	31.76	4.23412	1.60662e-96	PDF1.4	XP_012843159.1 PREDICTED: defensin-like protein 19 [Erythranthe guttata]
Unigene0027428	291.65	288.46	299.88	90.92	84.98	92.49	1.71316	5.49414e-96	DCAF11	PIN03740.1 WD40 repeat-containing protein [Handroanthus impetiginosus]
Unigene0018360	63.86	71.99	57.41	11.6	10.45	11.26	2.53652	5.90488e-95	--	TEY91664.1 hypothetical protein Saspl_013605 [Salvia splendens]
Unigene0025564	64.04	47.26	61.17	0.48	1.14	0.42	6.40163	9.04525e-95	CYP90C1	XP_011083167.1 3-epi-6-deoxocathasterone 23-monooxygenase [Sesamum indicum]
Unigene0035439	121.12	152.08	129.19	32.13	33.74	33.51	2.01757	1.63643e-93	--	XP_011079570.1 uncharacterized protein LOC105163060 [Sesamum indicum]
Unigene0021369	90	93.66	98.57	27.45	25.73	28.38	1.79094	1.67511e-93	NAT6	XP_011087158.1 nucleobase-ascorbate transporter 6 [Sesamum indicum]
Unigene0030235	124.95	138.36	112.99	11	9.65	14.55	3.41824	1.76901e-93	--	XP_027071192.1 protein NUCLEAR FUSION DEFECTIVE 4-like [Coffea arabica]
Unigene0009069	156.39	135.98	126.52	14.05	17.17	18.07	3.0872	1.88374e-93	AVP1	GER44108.1 K(+)-insensitive pyrophosphate-energized protonpump [Striga asiatica]
Unigene0026669	34.64	35.81	32.66	4.19	5.22	4.77	2.86225	7.38205e-93	--	PKI40779.1 hypothetical protein CRG98_038790 [Punica granatum]
Unigene0011912	28.61	34.68	31.36	4.19	3.82	4.94	2.86965	2.81929e-92	NPF2.13	XP_011086410.1 protein NRT1/ PTR FAMILY 2.13-like isoform X1 [Sesamum indicum]
Unigene0028167	153.15	165.06	201.36	31.18	27.88	28.74	2.56503	5.61287e-91	At5g03795	XP_011094446.1 probable glycosyltransferase At5g03795 [Sesamum indicum]
Unigene0032542	13.1	16.99	18.09	1.12	1.09	1.39	3.74237	1.28627e-90	JMJ706	XP_011069691.1 lysine-specific demethylase JMJ706 [Sesamum indicum]
Unigene0029797	30.08	25.06	30.18	0.5	0.61	0.44	5.78254	2.55074e-90	OMT3	PIN24698.1 Hydroxyindole-O-methyltransferase [Handroanthus impetiginosus]
Unigene0026684	67.6	68.7	58.82	11.81	11.76	10.82	2.5043	6.04447e-89	ACT2	VAI01729.1 unnamed protein product [Triticum turgidum subsp. durum] [Triticum turgidum]
Unigene0017588	46.88	31.07	35.1	0.69	0.86	0.38	5.87222	2.04328e-88	SLAH2	XP_011076467.1 S-type anion channel SLAH2 [Sesamum indicum]
Unigene0007528	89.89	99.42	83.32	13.2	13.07	16.09	2.68617	2.10576e-88	ERF008	XP_011074400.1 ethylene-responsive transcription factor ERF008-like [Sesamum indicum]
Unigene0034830	28.36	25.96	29.8	2.19	2.63	2.67	3.48941	4.61929e-88	ACLA-1	XP_011086595.1 ATP-citrate synthase alpha chain protein 1 [Sesamum indicum]
Unigene0023777	1115.95	1426.42	1451.03	242.79	208.43	257.34	2.49466	1.22729e-86	TUBB1	XP_011075465.1 tubulin beta-5 chain [Sesamum indicum]
Unigene0024736	332.4	352.64	347.08	70.71	66.99	85.8	2.20726	4.62475e-86	PRCP	XP_011089978.1 lysosomal Pro-X carboxypeptidase [Sesamum indicum]
Unigene0036067	79.8	57.86	61.23	0.83	0.64	1.64	5.99891	1.37506e-85	YUC3	XP_011080140.1 probable indole-3-pyruvate monooxygenase YUCCA5 [Sesamum indicum]
Unigene0035485	22.33	26.08	26.31	0.89	0.95	1.4	4.52743	1.59069e-85	PUMP5	XP_015074766.1 mitochondrial uncoupling protein 5-like [Solanum pennellii]
Unigene0016983	60.67	63.59	68.39	12.14	10.31	11.38	2.50961	1.7057e-85	VQ4	PIN08149.1 hypothetical protein CDL12_19277 [Handroanthus impetiginosus]
Unigene0007087	28.5	23.26	30.7	2.41	2.44	2.87	3.41702	1.82869e-85	--	XP_011082070.1 protein NUCLEAR FUSION DEFECTIVE 4 [Sesamum indicum]
Unigene0027258	124.75	140.65	96.26	4.06	4.07	6.96	4.58297	1.67911e-84	PUP10	XP_011096513.1 probable purine permease 9 isoform X1 [Sesamum indicum]
Unigene0008010	25.56	27.78	18.47	0.97	1.13	1.3	4.40058	5.22222e-84	PILS1	XP_011100000.1 protein PIN-LIKES 3 isoform X2 [Sesamum indicum]
Unigene0015522	2238.29	1935.09	2037.94	472.25	457.27	425.43	2.19666	2.07648e-83	Cyp96T1	KZV36259.1 hypothetical protein F511_14277 [Dorcoceras hygrometricum]
Unigene0032629	54.18	62.27	57.67	1.77	3.15	1.35	4.79547	3.57906e-83	At2g25520	XP_011081573.1 probable sugar phosphate/phosphate translocator At2g25520 [Sesamum indicum]
Unigene0023607	51.35	53.93	31.48	2.41	2.61	2.21	4.24151	1.55551e-82	ABCG39	XP_011076913.1 pleiotropic drug resistance protein 2 [Sesamum indicum]
Unigene0004639	379.03	400.09	347.63	105.95	95.8	104.46	1.87957	4.3728e-82	--	XP_011096558.1 uncharacterized protein LOC105175709 [Sesamum indicum]
Unigene0007113	38.22	39.78	41.62	9	10.38	10.03	2.02408	2.5895e-81	--	PIN18939.1 hypothetical protein CDL12_08393 [Handroanthus impetiginosus]
Unigene0001554	57.17	74.86	56.68	8.2	8.73	9.8	2.81964	8.22837e-81	--	XP_027061107.1 uncharacterized protein LOC113687777 [Coffea arabica]
Unigene0030661	39.3	45.25	36.39	5.5	5.46	6.83	2.76515	8.24329e-81	ZAT9	XP_011070953.1 zinc finger protein 91-like [Sesamum indicum]
Unigene0027479	433.85	471.48	471.05	190.09	191.16	184.72	1.28208	4.25551e-80	At1g54290	KAA8523675.1 hypothetical protein F0562_010098 [Nyssa sinensis]
Unigene0007936	525.4	434.47	447.94	90.49	85.44	80.06	2.45929	1.00516e-79	ABCG11	XP_011072099.1 ABC transporter G family member 11 [Sesamum indicum]
Unigene0003245	45.73	40.74	37.6	1.49	0.86	2.1	4.80121	3.11623e-78	At4g13710	PIN08700.1 Pectate lyase [Handroanthus impetiginosus]
Unigene0026388	24.47	20.96	21.79	0.28	0.73	0.59	5.39275	3.63955e-78	GIP2	XP_011099700.2 basic 7S globulin-like [Sesamum indicum]
Unigene0005725	400.59	376.89	200.1	12.08	14	11.47	4.70233	4.798e-78	AG118	XP_011082096.1 acetylornithine aminotransferase, chloroplastic/mitochondrial [Sesamum indicum]
Unigene0004102	232.24	261.41	265.05	88.4	92.64	86.12	1.50583	9.018e-78	HSPRO2	XP_011076720.1 nematode resistance protein-like HSPRO2 [Sesamum indicum]
Unigene0027866	62.59	75.88	69.11	17.7	17.11	19.46	1.93544	1.87373e-77	GDH2	PIM99892.1 Glutamate/leucine/phenylalanine/valine dehydrogenase [Handroanthus impetiginosus]
Unigene0006639	160.34	152.79	150.88	19.91	20.81	14	3.08402	1.47099e-76	ARF6	XP_011096636.1 auxin response factor 6 isoform X2 [Sesamum indicum]
Unigene0026465	419.35	515.82	509.38	149.48	155.7	158.41	1.6397	9.44353e-76	HMGR2	KZV41542.1 3-hydroxy-3-methylglutaryl-coenzyme A reductase 1-like [Dorcoceras hygrometricum]
Unigene0000023	109.2	90.6	65.89	6.17	6.69	5.36	3.86615	1.67722e-75	At5g35370	TEY39820.1 hypothetical protein Saspl_044430 [Salvia splendens]
Unigene0033876	784.06	523.07	624.92	50.13	58.92	42.6	3.67132	2.14413e-75	CXE15	PIN20932.1 Arylacetamide deacetylase [Handroanthus impetiginosus]
Unigene0028841	802.05	786.94	1188.15	83.14	59.56	79.45	3.64399	1.89901e-74	--	XP_031128386.1 glycine-rich cell wall structural protein-like [Ipomoea triloba]
Unigene0018985	121.96	141.45	114.2	19.65	20.5	25.51	2.52381	2.19493e-74	ZOX1	XP_011075344.1 zeatin O-glucosyltransferase-like [Sesamum indicum]
Unigene0011619	178.89	204.6	149.47	28.14	32.9	32.51	2.51022	5.01694e-74	PLT5	XP_011092774.1 polyol transporter 5 [Sesamum indicum]
Unigene0008924	14.57	16.41	18.36	0.86	0.8	1.41	4.00645	2.44291e-73	--	-
Unigene0015469	19	21.85	15.8	0.91	0.89	1.25	4.21519	3.60131e-73	URIII	PIN18530.1 Uricase (urate oxidase) [Handroanthus impetiginosus]
Unigene0029140	221.72	172.56	171.42	23.25	23.66	18.64	3.10937	9.46864e-73	JGB	XP_004238721.1 protein JINGUBANG [Solanum lycopersicum]
Unigene0005977	22.66	27.1	34.9	1.49	1.9	1.41	4.14057	1.2169e-72	At3g16560	PIN00327.1 Protein phosphatase 2C/pyruvate dehydrogenase (lipoamide) phosphatase [Handroanthus impetiginosus]
Unigene0019420	27.76	30.77	22.31	3.29	3.56	3.74	2.93237	1.24501e-72	LHW	XP_020552356.1 transcription factor LHW-like [Sesamum indicum]
Unigene0028884	370.44	353.73	389.84	122.18	118.43	112.05	1.65941	1.2637e-72	CPK19	XP_012841982.1 PREDICTED: calcium-dependent protein kinase-like [Erythranthe guttata]
Unigene0035803	29.04	29.69	29.54	8.73	8.37	9.05	1.75511	4.11478e-72	45512	PIN08237.1 hypothetical protein CDL12_19194 [Handroanthus impetiginosus]
Unigene0032347	68.18	63.95	64.48	9.5	9.48	6.71	2.93606	9.91112e-72	ACR8	XP_011081096.1 ACT domain-containing protein ACR8 [Sesamum indicum]
Unigene0026721	69.9	59.35	81.7	10.19	9.7	9.25	2.85583	1.03822e-71	PXN	XP_011084940.1 peroxisomal nicotinamide adenine dinucleotide carrier [Sesamum indicum]
Unigene0035558	65.31	91.07	71.84	7.57	10.31	7.98	3.14163	1.16448e-71	GGP5	XP_011087966.1 gamma-glutamyl peptidase 5 [Sesamum indicum]
Unigene0000876	36.06	32.59	33.87	4.12	5.71	4.67	2.82178	4.86902e-71	--	XP_011073937.1 uncharacterized protein LOC105158774 [Sesamum indicum]
Unigene0028034	171	151.32	103.49	10.35	11.48	12.33	3.63983	5.22422e-71	At5g53970	BAV57576.1 probable aminotransferase [Olea europaea]
Unigene0029381	636.73	832.79	471.72	44.23	48.44	58.93	3.67864	6.9413e-71	PP2B10	KAF3622319.1 putative pleiotropic drug resistance protein 1-like [Capsicum annuum]
Unigene0015907	36.71	33.87	24.9	2.15	1.88	2.06	3.97068	7.44623e-71	AIRP2	XP_012850245.1 PREDICTED: E3 ubiquitin-protein ligase RNF8 [Erythranthe guttata]
Unigene0025515	134.56	100.75	97.05	12.56	13.05	11.11	3.17811	1.12012e-70	BGLU40	KZV28363.1 beta-glucosidase 40-like [Dorcoceras hygrometricum]
Unigene0031091	49.35	40.54	45.61	0.74	1.15	0.3	5.95122	2.46058e-70	DIR11	KZV23793.1 dirigent protein 21-like [Dorcoceras hygrometricum]
Unigene0024914	44.39	51.3	38.72	4.57	3.19	2.82	3.66723	3.73151e-70	MLO6	XP_011077127.1 MLO-like protein 12 [Sesamum indicum]
Unigene0007932	101.67	95.59	105.74	28.3	26.13	24.53	1.94012	1.14402e-69	--	GER49402.1 phosphatidylinositol-4-phosphate 5-kinase family protein [Striga asiatica]
Unigene0021375	238.54	222.83	195.81	43.32	46.96	50.14	2.22654	1.4107e-69	At3g59070	PIN00874.1 hypothetical protein CDL12_26623 [Handroanthus impetiginosus]
Unigene0007013	21.26	17.33	18.64	0.61	0.99	0.51	4.76146	1.51424e-69	At1g80640	XP_011073359.1 probable receptor-like protein kinase At1g80640 [Sesamum indicum]
Unigene0035722	62.39	74.43	56.92	13.66	12.05	14.23	2.27822	4.79257e-69	EMB1444	PIN23111.1 hypothetical protein CDL12_04176 [Handroanthus impetiginosus]
Unigene0001532	49.15	50	51.11	16.61	17.74	16.99	1.54931	5.22923e-69	SIS3	TXG50293.1 hypothetical protein EZV62_022817 [Acer yangbiense]
Unigene0017453	63.42	61.86	48.54	6.89	7.91	5.88	3.07129	6.7877e-69	NAC056	XP_019154082.1 PREDICTED: NAC transcription factor 56-like [Ipomoea nil]
Unigene0030551	19.83	18.55	22.79	1.35	1.95	2.06	3.51252	1.07198e-68	trpB2	XP_022853045.1 uncharacterized protein LOC111374581 [Olea europaea var. sylvestris] [Olea europaea]
Unigene0020255	89.28	63.46	66.68	1.96	0.96	0.63	5.94973	5.50688e-68	--	-
Unigene0032077	79.13	91.04	64.36	9.92	10.78	12.38	2.82574	3.5249e-67	At5g19025	XP_020554751.1 uncharacterized protein At5g19025-like [Sesamum indicum]
Unigene0014421	45.62	55	27.59	1.02	0.49	0.68	5.87143	4.93942e-67	MPC4	PIN20229.1 hypothetical protein CDL12_07087 [Handroanthus impetiginosus]
Unigene0025546	35.01	36.06	43.85	7.26	6.78	5.98	2.52112	5.59843e-67	KRP3	XP_022896389.1 cyclin-dependent kinase inhibitor 7-like isoform X1 [Olea europaea var. sylvestris] [Olea europaea]
Unigene0030250	191.02	155.76	192.47	20.42	27.76	20.31	2.97699	1.0552e-66	--	XP_012846004.1 PREDICTED: uncharacterized protein LOC105966007 [Erythranthe guttata]
Unigene0001911	117.06	100.19	151.53	15.11	15.82	12.88	3.07343	1.37092e-66	At4g00750	XP_011091674.1 probable methyltransferase PMT15 [Sesamum indicum]
Unigene0035257	37.25	29.07	27.25	1.74	1.51	1.46	4.31225	3.84191e-66	At3g15720	PIN07882.1 Polygalacturonase [Handroanthus impetiginosus]
Unigene0017507	73.36	87.7	68.22	18.83	17.43	19.28	2.04551	3.94792e-66	PUB19	PIM97552.1 Ubiquitin--protein ligase [Handroanthus impetiginosus]
Unigene0026077	43.17	41.9	36.25	8.2	7.26	8.51	2.33952	6.10293e-66	WRKY4	PIN00550.1 hypothetical protein CDL12_26946 [Handroanthus impetiginosus]
Unigene0005768	48.4	39.53	36.35	5.28	4.51	3.84	3.18874	1.11152e-65	ROC3	XP_011070329.1 homeobox-leucine zipper protein HDG5 isoform X2 [Sesamum indicum]
Unigene0006940	51.85	47.86	45.99	14.18	14.68	14.84	1.7373	1.80306e-65	ATCSA-1	XP_011074354.1 DNA excision repair protein ERCC-8 [Sesamum indicum]
Unigene0021357	91.56	86.45	47.84	0.52	0.84	1.58	6.2634	3.26148e-65	HSD1	EYU23067.1 hypothetical protein MIMGU_mgv1a009247mg [Erythranthe guttata]
Unigene0026113	61.52	67.59	47.68	1.99	1.3	1	5.36492	3.85601e-65	--	-
Unigene0018086	40.86	45.98	63.28	6.01	5.13	4.56	3.25728	6.60439e-64	PMA4	PIN00818.1 Plasma membrane H+-transporting ATPase [Handroanthus impetiginosus]
Unigene0018681	22.68	20.78	20.5	2.48	3.23	2.44	2.9723	1.02846e-63	XBAT33	PIM98728.1 26S proteasome regulatory complex, subunit PSMD10 [Handroanthus impetiginosus]
Unigene0000651	25.09	20.1	16.36	1.42	1.38	1.65	3.78988	3.1498e-63	ALE2	XP_022879686.1 receptor-like serine/threonine-protein kinase ALE2 [Olea europaea var. sylvestris] [Olea europaea]
Unigene0000759	22.24	19.31	29.74	1.07	0.53	0.65	4.9857	4.32519e-63	RAM2	XP_011073520.1 glycerol-3-phosphate 2-O-acyltransferase 6-like [Sesamum indicum]
Unigene0020256	43.78	34.55	33.72	1.17	0.81	0.32	5.60636	6.84407e-63	--	-
Unigene0001276	25.87	29.54	24.17	5.85	5.33	6.23	2.19249	2.7324e-62	UXS5	GER57668.1 UDP-glucuronate decarboxylase [Striga asiatica]
Unigene0018359	734.12	403.68	639.84	27.91	40.21	26.54	4.23106	1.06085e-61	CYP96A15	XP_011095704.1 alkane hydroxylase MAH1 [Sesamum indicum]
Unigene0025833	17.2	16.9	22.08	0.18	0.27	0.1	6.67448	2.24401e-61	SHM1	XP_011073635.1 serine hydroxymethyltransferase, mitochondrial [Sesamum indicum]
Unigene0031667	12.14	15.15	14.21	1.65	1.76	2.25	2.87424	2.29958e-61	PVA22	PIN16045.1 VAMP-associated protein involved in inositol metabolism [Handroanthus impetiginosus]
Unigene0028847	38.12	46.32	20.76	0.5	0.74	0.45	5.95997	3.35678e-61	At1g21400	XP_011101974.1 2-oxoisovalerate dehydrogenase subunit alpha 1, mitochondrial isoform X1 [Sesamum indicum]
Unigene0012145	60.98	119.46	53.1	0.04	0.27	0.23	8.75649	5.35607e-61	COMT2	QAX90949.1 caffeic acid O-methyltransferase [Catalpa bungei]
Unigene0034411	166.12	122.82	104.87	5.27	7.29	9.61	4.15082	6.59995e-61	TPPJ	XP_011097592.1 probable trehalose-phosphate phosphatase J [Sesamum indicum]
Unigene0033966	25.52	29.6	22.68	5.89	6.04	5.45	2.16234	4.97155e-60	AHK4	XP_011070524.1 histidine kinase 4 [Sesamum indicum]
Unigene0026772	179.65	145.6	197.99	35.57	33.91	35.6	2.31598	1.14522e-59	DDB_G0286969	XP_011072601.1 LOW QUALITY PROTEIN: uncharacterized protein LOC105157816 [Sesamum indicum]
Unigene0004873	38.37	37.7	33.46	7.73	8.44	7.53	2.20837	1.65771e-59	--	XP_011070773.1 uncharacterized protein LOC105156360 [Sesamum indicum]
Unigene0026476	18.9	26.52	30.05	0.79	0.96	1.04	4.75757	2.08232e-59	ERF106	XP_012858579.1 PREDICTED: ethylene-responsive transcription factor ERF106 [Erythranthe guttata]
Unigene0031943	14.53	12.89	18.55	2.32	1.99	2.14	2.83332	2.60571e-59	FAB1B	XP_011093896.1 1-phosphatidylinositol-3-phosphate 5-kinase FAB1A [Sesamum indicum]
Unigene0005580	59.75	72.5	51.43	12.09	10.23	9.74	2.51835	4.34819e-59	PHYA1	XP_011092216.1 phytochrome A [Sesamum indicum]
Unigene0025369	19.1	15.91	18.32	1.32	1.12	1.28	3.84157	7.19445e-59	At5g58770	QIQ56025.1 cis-prenyl transferase 2 [Eremophila lucida]
Unigene0027073	66.56	88.93	40.39	3.84	4.06	3.87	4.05678	7.73469e-59	LKR/SDH	XP_011093904.1 alpha-aminoadipic semialdehyde synthase [Sesamum indicum]
Unigene0029003	19.91	17.03	21.09	3.41	3.01	2.55	2.69362	1.08815e-58	CYP71A1	XP_011094079.1 cytochrome P450 71A1-like [Sesamum indicum]
Unigene0031356	58.49	45.03	51.22	8.66	8.86	7.02	2.65664	1.78298e-58	PIP5K8	XP_011087754.1 phosphatidylinositol 4-phosphate 5-kinase 8 [Sesamum indicum]
Unigene0035961	44.09	59.6	43.17	6.76	8.17	8.39	2.6548	1.82308e-58	CPRF2	ANF04589.1 putative light inducible protein CPRF2 [Avicennia marina]
Unigene0010811	23.48	24.69	28.35	4.86	4.59	5.45	2.36052	4.57391e-58	--	XP_012856527.1 PREDICTED: uncharacterized protein LOC105975837 [Erythranthe guttata]
Unigene0027338	30.57	34.8	28.21	5.37	6.81	6.26	2.34336	6.28847e-58	--	PIN24442.1 hypothetical protein CDL12_02793 [Handroanthus impetiginosus]
Unigene0027693	51.27	48.49	17.32	0.16	0.21	0.23	7.60832	1.13273e-57	BHLH63	XP_020551514.1 transcription factor bHLH63 isoform X1 [Sesamum indicum]
Unigene0019977	36.34	29.9	30.84	0.35	0.3	0.32	6.64505	1.36969e-57	--	XP_012857822.1 PREDICTED: mitogen-activated protein kinase kinase kinase 1 [Erythranthe guttata]
Unigene0011291	16.71	15.68	18.77	2.68	2.43	3.22	2.61863	1.3805e-57	--	XP_011086653.1 uncharacterized protein LOC105168320 [Sesamum indicum]
Unigene0024672	123.4	100.41	132.37	20.9	17.94	15.24	2.71944	1.64367e-57	UDP-GALT1	GER40329.1 golgi nucleotide sugar transporter 5 [Striga asiatica]
Unigene0009880	101.25	95.52	95.89	23.82	27.98	29.25	1.85234	1.78012e-57	MEE23	XP_011096883.1 berberine bridge enzyme-like 15 [Sesamum indicum]
Unigene0029858	41.69	41.13	46.68	14.6	13.58	14.25	1.6098	1.79312e-57	GBA2	XP_011073769.1 non-lysosomal glucosylceramidase [Sesamum indicum]
Unigene0001363	29.32	24.83	19.68	2.79	3	2.37	3.17757	4.36721e-57	At5g50170	XP_011071944.1 C2 and GRAM domain-containing protein At5g50170 [Sesamum indicum]
Unigene0027138	668.72	659.36	577.97	170.68	176.65	144.55	1.95421	5.05552e-57	MSL8	PIN18013.1 putative mechanosensitive ion channel [Handroanthus impetiginosus]
Unigene0014277	81.66	58.29	58.02	5.83	6.11	3.83	3.65003	5.80153e-57	--	TEY27613.1 hypothetical protein Saspl_031124 [Salvia splendens]
Unigene0026514	695.19	704.52	633.79	272.56	273.82	279.45	1.30005	6.1729e-57	Os04g0650000	XP_011069730.1 low-temperature-induced cysteine proteinase-like [Sesamum indicum]
Unigene0025959	21.47	18.5	18.82	1.77	1.81	2.77	3.21074	9.91575e-57	PCS1	XP_011094889.1 aspartic proteinase PCS1 [Sesamum indicum]
Unigene0010844	120.04	126.12	89.05	20.87	20.37	19.7	2.4596	1.11186e-56	At3g23880	XP_012833501.1 PREDICTED: putative F-box protein At3g17480 [Erythranthe guttata]
Unigene0002761	43.27	44.57	41.34	10.17	7.92	10.08	2.19715	1.68033e-56	LOV1	XP_011091064.1 putative late blight resistance protein homolog R1B-16 [Sesamum indicum]
Unigene0027403	287.84	290.63	230.22	73.22	67.2	69.16	1.94809	1.86351e-56	ABCC4	XP_011079676.1 ABC transporter C family member 4 [Sesamum indicum]
Unigene0016825	77.67	99.23	88.78	20.6	25.25	21.53	1.9793	1.95216e-56	NQR	XP_030966785.1 NADPH:quinone oxidoreductase-like [Quercus lobata]
Unigene0002659	27.03	35.3	41.59	0.12	0.61	0.52	6.3774	3.27436e-56	--	-
Unigene0028869	91.62	88.47	85.85	19.25	20.47	25.22	2.03392	4.01613e-56	XLT2	XP_012855555.1 PREDICTED: xyloglucan galactosyltransferase KATAMARI1 homolog [Erythranthe guttata]
Unigene0024583	45.55	41.29	47.39	10.99	11.7	13.08	1.90789	1.02522e-55	SRF3	XP_011096273.1 protein STRUBBELIG-RECEPTOR FAMILY 1 [Sesamum indicum]
Unigene0027626	50.39	58.17	43.24	9.6	11.48	11.21	2.23301	1.53847e-55	DTX27	QBM79461.1 MATE31 [Rehmannia glutinosa]
Unigene0025703	285.25	295.09	328.44	103.81	107.78	117.54	1.46527	1.79887e-55	PIP2-1	PIN23375.1 Aquaporin (major intrinsic protein family) [Handroanthus impetiginosus]
Unigene0025800	121.96	178.09	107.78	15.79	18.47	15.87	3.02422	7.89275e-55	LTPG1	XP_011086802.1 non-specific lipid transfer protein GPI-anchored 1 [Sesamum indicum]
Unigene0011701	455.71	439.23	449.25	172.93	190.17	176.74	1.31613	8.22516e-55	--	PIN11616.1 Leucine-rich repeat (LRR) protein associated with apoptosis in muscle tissue [Handroanthus impetiginosus]
Unigene0005456	58.01	60.76	75.63	12.89	13.15	14.58	2.25877	1.47669e-54	--	-
Unigene0022488	42.23	34.51	39.38	6.34	5.28	4.48	2.85048	1.77624e-54	--	XP_021999597.1 protein SPEAR4 [Helianthus annuus]
Unigene0004316	221.25	274.75	436.66	26.95	30.07	28.22	3.45175	2.43864e-54	UGD2	GER49340.1 UDP-glucose 6-dehydrogenase family protein [Striga asiatica]
Unigene0024485	140.66	130.58	76.43	7.55	8.45	10.48	3.71474	2.48046e-54	RLK7	XP_011074301.1 receptor-like protein kinase HAIKU2 [Sesamum indicum]
Unigene0017384	54.71	84.27	46.03	3.34	3.29	4.68	4.03193	3.39727e-54	ALS3	XP_011077408.1 protein ALUMINUM SENSITIVE 3 [Sesamum indicum]
Unigene0021011	7.27	9.67	6.68	1.43	1.24	1.28	2.58008	4.76551e-54	--	RWR91636.1 hypothetical protein CKAN_02080200 [Cinnamomum micranthum f. kanehirae]
Unigene0003478	26.72	30.07	37.72	4.42	3.51	2.94	3.12012	7.94209e-54	SKU5	XP_011101121.1 monocopper oxidase-like protein SKS1 [Sesamum indicum]
Unigene0019940	199.47	312.26	152.88	17.42	17.59	15.13	3.72847	2.31151e-53	SAG21	PIM98400.1 hypothetical protein CDL12_29125 [Handroanthus impetiginosus]
Unigene0028358	127.47	84.11	115.97	16.63	15.17	14.34	2.82763	3.53789e-53	FAR3	RDX92870.1 hypothetical protein CR513_24942, partial [Mucuna pruriens]
Unigene0013091	38.82	27.37	48.16	3.25	3	3.04	3.62163	4.07253e-53	--	PIN26762.1 hypothetical protein CDL12_00481 [Handroanthus impetiginosus]
Unigene0014325	115.5	146.42	107.97	28.29	32.48	30.33	2.02157	8.15333e-53	--	XP_020551042.1 uncharacterized protein LOC105160920 [Sesamum indicum]
Unigene0028243	104.68	124.75	100.19	6.62	9.14	13.26	3.50568	9.3951e-53	--	-
Unigene0023387	135.96	153.19	101.42	6.88	5.12	11.1	4.07962	1.53674e-52	FL	ALP48589.1 flavonol synthase [Erythranthe cardinalis]
Unigene0015335	17.78	14.81	23.68	1.1	1.33	0.81	4.1183	1.62687e-52	CYP71B10	PSR86236.1 4-hydroxyphenylacetaldehyde oxime monooxygenase [Actinidia chinensis var. chinensis] [Actinidia chinensis]
Unigene0029414	486.84	503.79	480.45	239.6	229.37	236.08	1.06108	1.77817e-52	TRXH	GER35520.1 thioredoxin [Striga asiatica]
Unigene0033824	71.63	87.97	90.55	21.07	23.65	25.74	1.82792	3.82049e-52	SAM1	GER45449.1 S-adenosylmethionine synthase [Striga asiatica]
Unigene0002016	209.04	227.24	251.56	76.49	84.36	82.84	1.49703	3.9e-52	--	TEY53782.1 hypothetical protein Saspl_019842 [Salvia splendens]
Unigene0014444	11.45	14.63	11.52	0.08	0.1	0.2	6.62859	1.26317e-51	PII-2	GER31916.1 leucine-rich repeat receptor-like protein kinase family protein, partial [Striga asiatica]
Unigene0036181	46.1	93.02	81.43	0.8	1.33	1.9	5.77418	1.89202e-51	SAUR41	PIN19533.1 hypothetical protein CDL12_07789 [Handroanthus impetiginosus]
Unigene0020013	31.46	30.78	33.39	6.01	5.32	6.43	2.42883	3.48486e-51	RHA2A	XP_020552260.1 E3 ubiquitin-protein ligase RNF13-like [Sesamum indicum]
Unigene0031944	24.49	23.04	20.24	1.92	2.32	1.14	3.65497	4.08607e-51	MHX	EYU42222.1 hypothetical protein MIMGU_mgv1a004654mg [Erythranthe guttata]
Unigene0023014	28.01	48.73	34.67	2.49	3.51	3.42	3.56401	8.65854e-51	CSE	XP_011084365.1 caffeoylshikimate esterase [Sesamum indicum]
Unigene0027449	18.94	20.66	19.92	1.82	2.68	3.15	2.95984	1.56712e-50	ROPGEF12	XP_012852675.1 PREDICTED: rho guanine nucleotide exchange factor 8-like [Erythranthe guttata]
Unigene0000907	25.83	26.29	23.28	3.75	3.31	3.5	2.83595	3.04399e-50	--	-
Unigene0011971	19.13	19.87	14.88	3.03	2.59	2.89	2.66252	4.07656e-50	CRK	XP_011085503.1 CDPK-related protein kinase [Sesamum indicum]
Unigene0016447	192.2	165.48	190.13	59.61	62.03	59.74	1.59466	5.43685e-50	ARF16	XP_011089288.1 auxin response factor 18 isoform X2 [Sesamum indicum]
Unigene0026216	18.27	18.88	19.3	3.13	3.81	3.35	2.45573	8.46366e-50	BCCP1	AIU99492.1 Biotin Carboxyl Carrier Protein [Salvia miltiorrhiza]
Unigene0029699	47.97	54.6	47.62	12.45	16	14.18	1.81685	1.64278e-49	HSFB1	PIN10102.1 hypothetical protein CDL12_17319 [Handroanthus impetiginosus]
Unigene0023617	424.87	331.8	333.29	56.27	57.84	76.15	2.51823	2.40881e-49	SCPL34	XP_011075284.1 serine carboxypeptidase-like 34 [Sesamum indicum]
Unigene0000037	1931.45	1751.63	1850.72	710.97	744.86	757.92	1.32178	3.05399e-49	GASA10	XP_011097848.1 fluoride export protein 2 [Sesamum indicum]
Unigene0010803	34.97	27.9	18.1	0.11	0.51	0.28	6.49132	4.07258e-49	GA20OX1	BAJ65441.1 gibberellin 20-oxidase [Torenia fournieri]
Unigene0028936	529.4	573.32	497.35	59.63	72.35	102.79	2.76882	4.13249e-49	ERF061	PIN21009.1 hypothetical protein CDL12_06299 [Handroanthus impetiginosus]
Unigene0029701	67.27	74.48	92.81	13.4	9.8	13.76	2.66592	9.27386e-49	--	GER53042.1 hypothetical protein STAS_30534 [Striga asiatica]
Unigene0022400	62.59	58.05	35.54	0.62	0.1	0.43	7.08543	9.80608e-49	--	-
Unigene0024972	84.91	62.59	83.41	15.26	15.11	13.41	2.39899	1.64211e-48	IRKI	XP_011081115.1 IRK-interacting protein [Sesamum indicum]
Unigene0001782	19.16	21.63	17.14	4.32	4.65	4.79	2.07383	1.6865e-48	--	PIN01734.1 hypothetical protein CDL12_25759 [Handroanthus impetiginosus]
Unigene0033789	24.66	20.45	35.08	2.75	2.44	2.75	3.33621	2.79246e-48	At2g42960	PIN25624.1 Serine/threonine protein kinase [Handroanthus impetiginosus]
Unigene0014179	263.67	256.88	310.51	69.19	78.16	59.39	2.00714	3.53471e-48	SBT1.5	XP_012833831.1 PREDICTED: subtilisin-like protease SBT1.7 [Erythranthe guttata]
Unigene0014626	266.92	278.31	260.5	93.82	92.75	111.73	1.43353	4.30519e-48	UTR4	OIV98751.1 hypothetical protein TanjilG_24922 [Lupinus angustifolius]
Unigene0028565	587.78	921.49	803.07	150.9	134.12	171.05	2.34203	4.74346e-48	Os07g0662500	NP_001274914.1 elongation factor 1-beta 2-like [Solanum tuberosum]
Unigene0029384	64.16	65.01	66.34	29.24	29.4	26.73	1.19544	5.16053e-48	At5g10370	PIN24607.1 DEAH-box RNA helicase [Handroanthus impetiginosus]
Unigene0031097	16.66	18.44	16.59	4.46	5.09	5.11	1.818	6.42175e-48	G6PD2	PIN02853.1 Glucose-6-phosphate 1-dehydrogenase [Handroanthus impetiginosus]
Unigene0028415	28.58	29.81	20.28	0.47	0.7	0.9	5.24811	1.54498e-47	--	XP_012830294.1 PREDICTED: uncharacterized protein LOC105951414 [Erythranthe guttata]
Unigene0029233	73.9	63.81	104.06	10.25	6.93	9.5	3.1798	1.81798e-47	OPT5	PIN09466.1 Sexual differentiation process protein ISP4 [Handroanthus impetiginosus]
Unigene0005148	18.96	16.63	13.84	2.18	2.34	1.55	3.02562	2.33542e-47	ABCG15	GER40781.1 ABC transporter G family member [Striga asiatica]
Unigene0024045	19.56	22.3	18.78	6.94	6.86	6.7	1.56465	2.99469e-47	FBPban1	XP_011101507.1 fructose-1,6-bisphosphatase, cytosolic [Sesamum indicum]
Unigene0029759	47.15	37.81	52.65	9.96	10.35	9.26	2.21838	3.50334e-47	DGK2	PIN24251.1 Diacylglycerol kinase [Handroanthus impetiginosus]
Unigene0014077	53.72	49.45	45.58	11.33	11.4	14.23	2.00885	3.6955e-47	UGT90A1	XP_011071831.1 UDP-glycosyltransferase 90A1-like [Sesamum indicum]
Unigene0012384	23.17	22	15.24	2.66	2.8	2.13	2.99262	5.29664e-47	KIPK1	PIN25409.1 putative serine/threonine protein kinase [Handroanthus impetiginosus]
Unigene0013806	79.83	89.16	79.26	39.88	39.26	40.72	1.05044	1.11429e-46	RZFP34	PIM99878.1 Zn-finger protein [Handroanthus impetiginosus]
Unigene0020719	107.78	111.22	175.31	15.89	19.97	16.03	2.9258	1.19871e-46	CYP82A3	XP_011099742.1 cytochrome P450 CYP82D47-like [Sesamum indicum]
Unigene0023914	239.43	205.35	242.95	71.95	75.12	67.03	1.68356	1.9474e-46	B3GALT7	PIN15854.1 Galactosyltransferase [Handroanthus impetiginosus]
Unigene0027710	24.64	18.79	23.1	3.47	2.79	2.71	2.89083	2.13025e-46	--	GER50629.1 hypothetical protein STAS_27949 [Striga asiatica]
Unigene0035983	14.94	10.97	15.09	1.11	1.04	1.27	3.58356	2.20224e-46	CEL1	PIN21742.1 Cellulase [Handroanthus impetiginosus]
Unigene0024168	32.8	45.5	41.6	10.82	9.95	11.64	1.88732	3.26684e-46	--	XP_011079861.2 LOW QUALITY PROTEIN: protein TIME FOR COFFEE [Sesamum indicum]
Unigene0026692	66.55	61.45	66.38	25.16	25.35	24.47	1.3743	4.73236e-46	TMN7	TEY74018.1 transmembrane 9 superfamily member 2/4 [Salvia splendens]
Unigene0021023	81.47	80.49	78.29	31.94	33.07	35.3	1.26007	6.20145e-46	RTNLB2	XP_019260314.1 PREDICTED: reticulon-like protein B2 [Nicotiana attenuata]
Unigene0026001	118.38	113.05	104.97	45.15	42.73	43.4	1.35753	1.13947e-45	LOX6	XP_011086753.1 lipoxygenase 6, chloroplastic [Sesamum indicum]
Unigene0027508	51.83	64.2	58.23	13.28	13.87	17.79	1.95517	1.39461e-45	SRO5	XP_011101326.1 probable inactive poly [ADP-ribose] polymerase SRO5 [Sesamum indicum]
Unigene0021800	13.08	17.91	17.79	0.83	0.86	1.59	3.89452	1.59585e-45	UGT75C1	XP_022874990.1 crocetin glucosyltransferase, chloroplastic-like [Olea europaea var. sylvestris] [Olea europaea]
Unigene0034998	23.31	25.18	25.1	7.74	7.06	7.55	1.71923	1.90771e-45	tlcd4-a	XP_012829769.1 PREDICTED: transmembrane protein 56-B [Erythranthe guttata]
Unigene0033964	26.76	35.75	48.67	3.59	4.07	3.83	3.27445	2.04065e-45	WRKY28	PWA39031.1 WRKY domain-containing protein [Artemisia annua]
Unigene0024821	19.58	17.05	20.97	1.72	1.71	2.37	3.31194	3.76035e-45	OFP13	XP_011076850.1 transcription repressor OFP13 [Sesamum indicum]
Unigene0028909	37.92	43.61	36.81	13.02	13.54	11.76	1.62677	4.32954e-45	--	XP_011070438.1 uncharacterized protein LOC105156095 isoform X1 [Sesamum indicum]
Unigene0025828	109.36	112.36	105.66	47.42	49.51	53.3	1.12379	7.23347e-45	--	PIN10108.1 hypothetical protein CDL12_17308 [Handroanthus impetiginosus]
Unigene0000388	22.9	27.1	9.99	0.56	0.55	0.41	5.30258	7.53169e-45	--	XP_019173282.1 PREDICTED: protein FAR-RED IMPAIRED RESPONSE 1-like [Ipomoea nil]
Unigene0032379	240.16	273.64	304.32	68.88	70.93	89.21	1.83684	7.76922e-45	--	XP_011082302.1 B2 protein [Sesamum indicum]
Unigene0033965	29.61	48.07	51.87	3.28	2.91	4.04	3.66263	7.90108e-45	WRKY48	XP_011100744.2 probable WRKY transcription factor 48, partial [Sesamum indicum]
Unigene0036613	92.69	65.67	103.33	4.39	8.36	4.49	3.92403	1.20508e-44	SWEET1	PIN16575.1 Multitransmembrane protein [Handroanthus impetiginosus]
Unigene0032507	45.24	45.38	61.52	11.64	9.72	9.01	2.32468	1.57186e-44	NPC1	XP_020547514.1 Niemann-Pick C1 protein [Sesamum indicum]
Unigene0032122	32.36	35.84	65.47	0.6	0.68	0.25	6.449	1.78473e-44	PP2C51	PIN20518.1 Serine/threonine protein phosphatase [Handroanthus impetiginosus]
Unigene0031046	149.96	166.9	73.97	3.12	7.06	4.22	4.7624	1.96729e-44	--	XP_022873148.1 uncharacterized protein LOC111392110 [Olea europaea var. sylvestris] [Olea europaea]
Unigene0006852	275.89	235.01	128.81	16.01	13.24	14.23	3.87899	3.26295e-44	--	PIM98958.1 hypothetical protein CDL12_28550 [Handroanthus impetiginosus]
Unigene0025887	334.18	189.86	263.65	30.46	30.67	36.19	3.01682	3.55441e-44	LSI3	XP_011076136.1 putative transporter arsB [Sesamum indicum]
Unigene0031300	22.95	25.63	27.53	8.05	7.86	8.17	1.66025	3.70361e-44	RHM1	XP_011082935.1 trifunctional UDP-glucose 4,6-dehydratase/UDP-4-keto-6-deoxy-D-glucose 3,5-epimerase/UDP-4-keto-L-rhamnose-reductase RHM2-like [Sesamum indicum]
Unigene0026504	19.06	15.22	14.57	2.71	2.88	2.31	2.62843	8.42793e-44	PAH1	PIN03878.1 Protein involved in plasmid maintenance/nuclear protein involved in lipid metabolism [Handroanthus impetiginosus]
Unigene0031448	7.35	6.19	6.97	0.26	0.52	0.56	3.93602	9.63864e-44	PIP5K4	PIN01142.1 Phosphatidylinositol-4-phosphate 5-kinase [Handroanthus impetiginosus]
Unigene0023830	84.5	98.42	110.84	26.83	28.44	27.16	1.8334	9.98076e-44	--	XP_012852645.1 PREDICTED: translocon-associated protein subunit beta-like [Erythranthe guttata]
Unigene0032561	23.73	21.56	36.27	2.88	2.25	2.92	3.3408	3.55141e-43	NRT2.5	PIN14912.1 Permease of the major facilitator superfamily [Handroanthus impetiginosus]
Unigene0034245	22.52	24.36	37.24	3.17	2.82	2.24	3.35348	4.03216e-43	NFD4	XP_011092895.1 protein NUCLEAR FUSION DEFECTIVE 4-like [Sesamum indicum]
Unigene0025477	29.66	33.12	43.24	6.86	7.65	7.77	2.25052	4.06336e-43	PBL3	XP_027097311.1 probable serine/threonine-protein kinase PBL3 [Coffea arabica]
Unigene0017374	126.61	114.23	100.5	28.1	32.21	25.66	1.9893	4.47577e-43	PP2C53	XP_011078036.1 probable protein phosphatase 2C 50 [Sesamum indicum]
Unigene0026039	355.54	168.9	366.69	15.26	15.03	7.98	4.54135	6.45869e-43	SSL2	XP_011075619.1 protein STRICTOSIDINE SYNTHASE-LIKE 2 [Sesamum indicum]
Unigene0002281	22.33	33.15	26.78	3.08	3.04	4.2	2.99475	8.07131e-43	NUDT25	PSR90969.1 Nudix hydrolase [Actinidia chinensis var. chinensis] [Actinidia chinensis]
Unigene0025334	456.38	300.11	464.07	59.35	44.49	62.83	2.87248	1.05634e-42	At1g64390	XP_011101037.1 endoglucanase 6 [Sesamum indicum]
Unigene0025643	120.83	80	100.54	17.76	18.3	15.48	2.54777	1.33852e-42	ALDH2C4	PIN25956.1 Aldehyde dehydrogenase [Handroanthus impetiginosus]
Unigene0004312	18.01	16.45	12.93	0.78	1.39	1.4	3.73059	1.47177e-42	AOS3	XP_011088323.1 allene oxide synthase 3-like [Sesamum indicum]
Unigene0030233	211.24	190.19	194.63	38.5	41.79	26.18	2.48501	3.41568e-42	--	PIN24452.1 hypothetical protein CDL12_02803 [Handroanthus impetiginosus]
Unigene0032905	37.34	47.69	31.73	6.44	7.81	7.4	2.43111	3.76075e-42	HIPP06	XP_022889286.1 heavy metal-associated isoprenylated plant protein 3-like, partial [Olea europaea var. sylvestris] [Olea europaea]
Unigene0035829	146.26	77.67	117.53	1.4	3.8	0.84	5.82102	4.43898e-42	CPC	XP_023739678.1 transcription factor CPC-like [Lactuca sativa]
Unigene0028532	32.4	27.68	49.1	0.51	1.24	0.33	5.71398	7.01744e-42	--	GER46892.1 hypothetical protein STAS_23952 [Striga asiatica]
Unigene0032446	66.44	62.99	51.62	9.68	13.21	9.09	2.50115	7.14217e-42	GAT1_2.1	PIN01875.1 Gamma-glutamyl-gamma-aminobutyrate hydrolase [Handroanthus impetiginosus]
Unigene0033505	152.74	157.81	158.79	58.36	63.64	71.92	1.27517	8.60955e-42	ADH1	PIN14138.1 Alcohol dehydrogenase, class III [Handroanthus impetiginosus]
Unigene0011117	37.53	24.39	19.74	1.97	1.86	1.91	3.83051	9.15414e-42	CKX3	BAM74651.1 cytokinin oxidase/dehydrogenase [Torenia fournieri]
Unigene0010962	86.27	57.01	116.64	2.18	5.38	3.8	4.51603	1.47311e-41	PLP3	XP_011099197.1 patatin-like protein 2 [Sesamum indicum]
Unigene0032924	315.87	348.6	322.57	106.13	99.56	77.37	1.802	1.57656e-41	BOR1	XP_022845088.1 boron transporter 1-like [Olea europaea var. sylvestris] [Olea europaea]
Unigene0007007	60.24	36.22	82.78	4.4	2.88	3.77	4.01977	1.72167e-41	WSD1	XP_011075993.1 O-acyltransferase WSD1 [Sesamum indicum]
Unigene0024303	48.06	61.29	27.34	1.8	2.43	3.14	4.2131	2.51391e-41	PPCK2	TEY91809.1 c-Jun N-terminal kinase [Salvia splendens]
Unigene0027322	33.9	36.78	38.9	4.09	3.97	6.79	2.88345	3.23789e-41	LOGL6	XP_011074666.1 cytokinin riboside 5'-monophosphate phosphoribohydrolase LOG1-like [Sesamum indicum]
Unigene0023314	171.27	251.39	228.36	56.66	57.52	62.94	1.87797	3.26843e-41	UBC10	TYH98712.1 hypothetical protein ES332_A11G016500v1, partial [Gossypium tomentosum]
Unigene0030351	1314.54	1000.41	1283.38	334.95	309.44	294.35	1.93853	3.72258e-41	CER1	XP_011085147.1 protein ECERIFERUM 1-like [Sesamum indicum]
Unigene0019300	44.41	58.29	37.47	6.05	4.65	6.58	3.02	4.83873e-41	--	XP_011074521.1 uncharacterized protein LOC105159227 [Sesamum indicum]
Unigene0017337	375.83	579.17	503.41	119.19	120.2	137.62	1.95172	5.17341e-41	RBP47	XP_011092727.1 polyadenylate-binding protein RBP47-like isoform X2 [Sesamum indicum]
Unigene0029721	32.43	42.92	34.88	12.25	12.04	12.91	1.56714	6.72703e-41	At2g27500	XP_011090341.1 glucan endo-1,3-beta-glucosidase 14 [Sesamum indicum]
Unigene0024096	205.11	221.25	186.73	90.27	88.65	84.88	1.21665	8.3968e-41	HAB1	XP_022853205.1 protein phosphatase 2C 7-like [Olea europaea var. sylvestris] [Olea europaea]
Unigene0019557	17	17.72	18.98	4.55	5.3	5.71	1.78708	9.22308e-41	At4g12130	XP_011081120.1 putative transferase At4g12130, mitochondrial [Sesamum indicum]
Unigene0032298	20.28	19.44	19.47	3.01	4.15	3.15	2.52131	9.85296e-41	--	XP_012848558.1 PREDICTED: uncharacterized protein LOC105968470 isoform X1 [Erythranthe guttata]
Unigene0006803	12.15	10.49	11.88	2.07	1.9	1.72	2.60093	1.09875e-40	PLP6	PIN11102.1 Ca2+-independent phospholipase A2 [Handroanthus impetiginosus]
Unigene0004001	20.12	18.75	12.7	0.54	0.41	0.15	5.55096	1.61052e-40	--	-
Unigene0032688	78.35	82.27	80.91	31.48	34.61	37.64	1.21937	2.32392e-40	CATHB3	XP_012835019.1 PREDICTED: cathepsin B-like [Erythranthe guttata]
Unigene0013044	11.12	9.31	12.54	1.02	0.87	0.75	3.64254	2.64001e-40	At3g26430	XP_012855315.1 PREDICTED: GDSL esterase/lipase At3g26430 isoform X2 [Erythranthe guttata]
Unigene0019041	4.31	4.88	5.52	0.13	0.09	0.1	5.52258	2.86022e-40	FPP7	XP_011083567.1 filament-like plant protein 7 isoform X2 [Sesamum indicum]
Unigene0028247	20.01	22.22	21.92	7.47	6.88	7.63	1.54526	3.34463e-40	--	XP_020551743.1 uncharacterized protein LOC105169152 isoform X2 [Sesamum indicum]
Unigene0034099	36.77	37.91	23.64	2.82	3.77	4.09	3.20257	3.65052e-40	MTP10	XP_011095744.1 metal tolerance protein 9-like [Sesamum indicum]
Unigene0018070	94.07	90.1	89.15	30.81	22.4	25.58	1.79451	6.69333e-40	LNG1	XP_011099024.1 protein LONGIFOLIA 2 [Sesamum indicum]
Unigene0032472	5.56	5.8	7.12	0.72	0.58	0.88	3.08356	1.38453e-39	HDG11	XP_011086973.1 homeobox-leucine zipper protein HDG11 [Sesamum indicum]
Unigene0025189	6.48	5.33	6.18	0.37	0.61	0.6	3.5092	1.38911e-39	RLP47	XP_012844644.1 PREDICTED: LRR receptor-like serine/threonine-protein kinase FLS2 [Erythranthe guttata]
Unigene0026287	42.89	44.6	43.81	19.47	19.21	20.52	1.1492	1.41883e-39	At2g32040	XP_011090705.1 folate-biopterin transporter 1, chloroplastic [Sesamum indicum]
Unigene0030095	1891.03	1524.85	1742.06	592.81	568.1	590.5	1.55828	1.65183e-39	APG	PIN17096.1 Triacylglycerol lipase [Handroanthus impetiginosus]
Unigene0016404	300.29	292.68	223.16	79.44	77.28	73.63	1.82497	3.66243e-39	XYLA	XP_022842364.1 xylose isomerase [Olea europaea var. sylvestris] [Olea europaea]
Unigene0032564	154.69	148.4	85.18	17.79	17.62	16.19	2.91162	4.18882e-39	PMI2	XP_012840994.1 PREDICTED: mannose-6-phosphate isomerase 1-like [Erythranthe guttata]
Unigene0032097	5.21	4.51	7.05	0.06	0.02	0.04	7.1267	5.25189e-39	PDR1	XP_020547917.1 LOW QUALITY PROTEIN: pleiotropic drug resistance protein 1 [Sesamum indicum]
Unigene0031559	16.21	16.25	22.61	2.22	2.15	1.79	3.16026	9.48269e-39	ERF2	XP_012858578.1 PREDICTED: ethylene-responsive transcription factor 2-like [Erythranthe guttata]
Unigene0017812	167.51	171.02	135.8	26.19	36.07	38.55	2.23425	9.61123e-39	--	-
Unigene0031047	24.87	49.28	57.17	3.97	3.53	4.26	3.48113	1.65457e-38	TPR4	XP_031105090.1 topless-related protein 1-like isoform X2 [Ipomoea triloba]
Unigene0012327	83.48	83.92	84.88	39.33	41.91	37.07	1.09245	2.94625e-38	STY46	PIN16258.1 Tyrosine kinase [Handroanthus impetiginosus]
Unigene0001697	75.17	73.87	84.67	33	30.84	29.64	1.32199	3.72168e-38	DTX24	PIN05103.1 putative membrane protein, predicted efflux pump [Handroanthus impetiginosus]
Unigene0036166	64.05	69.88	78.6	23.11	20.32	23.43	1.66845	5.14362e-38	PP16-2	XP_011093160.1 elicitor-responsive protein 3 [Sesamum indicum]
Unigene0030716	115.71	57.05	65.06	0.4	0.39	0	8.2338	7.79215e-38	--	-
Unigene0021506	11.74	15.54	14.29	3.2	3.36	3.07	2.10994	8.84336e-38	--	XP_011086622.1 uncharacterized protein LOC105168293 [Sesamum indicum]
Unigene0028954	14.58	16.45	10.83	0.3	0.39	0.6	5.02013	1.11325e-37	ZPR4	XP_012839681.1 PREDICTED: uncharacterized protein LOC105960057 [Erythranthe guttata]
Unigene0029546	17.22	13.37	10.44	0.92	0.96	0.91	3.87834	1.21107e-37	--	TEY21878.1 hypothetical protein Saspl_044686 [Salvia splendens]
Unigene0000644	9.37	11.89	10.52	0.36	0.94	0.76	3.9474	1.3388e-37	CER2	XP_011091952.1 protein ECERIFERUM 2-like [Sesamum indicum]
Unigene0025065	12.17	14.69	10.57	0.03	0.14	0.06	7.34642	1.55991e-37	MYB124	XP_011071018.1 transcription factor MYB124-like isoform X1 [Sesamum indicum]
Unigene0001748	65.46	73.46	76.87	32.47	28.05	31.45	1.23039	1.65743e-37	BIM1	TEY84374.1 hypothetical protein Saspl_006032 [Salvia splendens]
Unigene0007939	70.59	62.76	71.17	22.98	19.31	17.65	1.77065	1.71129e-37	PAO2	XP_027064374.1 polyamine oxidase 2-like isoform X1 [Coffea arabica]
Unigene0018932	30.43	32.8	22.25	5.68	5.09	4.67	2.46891	2.41086e-37	GPAT8	XP_011092551.1 glycerol-3-phosphate 2-O-acyltransferase 4 [Sesamum indicum]
Unigene0026474	24.52	27.2	26.36	8.04	7.05	8.63	1.71885	2.43963e-37	ERF008	XP_022844732.1 ethylene-responsive transcription factor ERF011-like [Olea europaea var. sylvestris] [Olea europaea]
Unigene0030402	22.12	26.9	41.38	2.69	2.96	3.8	3.25794	2.88639e-37	A6	XP_011089044.1 probable glucan endo-1,3-beta-glucosidase A6 [Sesamum indicum]
Unigene0032225	5.21	4.92	4.06	0.26	0.24	0.25	4.24184	2.89988e-37	RHD3	XP_011072514.1 protein ROOT HAIR DEFECTIVE 3 homolog 1 [Sesamum indicum]
Unigene0028066	17.74	21.23	22.17	6.88	5.81	7.14	1.62443	3.67958e-37	ACA8	XP_011094124.1 calcium-transporting ATPase 10, plasma membrane-type isoform X1 [Sesamum indicum]
Unigene0025172	70.92	78.8	77.59	19.22	26.69	24.74	1.6859	3.78655e-37	At5g01750	XP_022874121.1 protein LURP-one-related 10-like [Olea europaea var. sylvestris] [Olea europaea]
Unigene0005397	4.82	8.06	6.67	0.21	0.15	0.42	4.64755	4.57659e-37	At4g27290	XP_012827565.1 PREDICTED: G-type lectin S-receptor-like serine/threonine-protein kinase At4g27290 [Erythranthe guttata]
Unigene0017377	19.86	30.79	21.76	3.9	4.97	4.17	2.47325	6.30887e-37	At1g30090	GER40846.1 SKP1-like protein [Striga asiatica]
Unigene0032380	115.29	145.05	141.8	45.22	47.26	55.05	1.44669	6.71812e-37	--	RVX04110.1 B2 protein [Vitis vinifera]
Unigene0001017	31.89	40.3	29.15	5	4.96	7.52	2.53543	7.22158e-37	WOX1	QFQ60703.1 WUSCHEL-related homeobox transcription factor 1 [Jasminum sambac]
Unigene0036099	64.46	72.02	62.94	24.93	26.65	29.5	1.29839	7.25696e-37	UGT89B2	XP_011084011.1 LOW QUALITY PROTEIN: UDP-glycosyltransferase 89B2-like [Sesamum indicum]
Unigene0018302	10.1	10.99	9.95	0.94	0.99	1.2	3.30989	8.05171e-37	--	-
Unigene0034535	38.98	35.91	41.22	13.55	12.14	12.19	1.61598	8.08264e-37	SDR1	XP_020550645.1 uncharacterized protein LOC105174340 [Sesamum indicum]
Unigene0026667	8.37	7.59	9.1	0.25	0.18	0.2	5.31389	1.0918e-36	UGT85A24	AYC63483.1 UDP-glycosyltransferase [Scoparia dulcis]
Unigene0021009	19.82	10.43	14.87	0.4	0.72	0.65	4.67195	1.74818e-36	--	-
Unigene0002302	580.21	534.22	422.79	137.83	147.8	157.49	1.79455	2.80588e-36	HPD	XP_011100558.1 4-hydroxyphenylpyruvate dioxygenase [Sesamum indicum]
Unigene0035135	24.42	25.13	23.43	8.83	9.37	8.98	1.42496	3.12483e-36	OXI1	XP_012835169.1 PREDICTED: serine/threonine-protein kinase OXI1-like [Erythranthe guttata]
Unigene0028560	29	22.51	33.95	2.41	3.8	3.81	3.09237	3.12483e-36	MYB15	XP_011091315.1 myb-related protein Myb4 [Sesamum indicum]
Unigene0026722	12.6	17.33	21.56	1.61	1.2	2.14	3.37879	3.96352e-36	PME51	XP_011097189.1 probable pectinesterase/pectinesterase inhibitor 51 [Sesamum indicum]
Unigene0001519	94.22	71.7	93.67	22.86	22.72	18.93	2.00864	4.90528e-36	--	PIN17154.1 hypothetical protein CDL12_10176 [Handroanthus impetiginosus]
Unigene0032221	886.8	819.64	804.15	377.87	388.9	406.02	1.09808	1.67867e-35	BAM1	XP_011091372.1 beta-amylase 1, chloroplastic [Sesamum indicum]
Unigene0011110	146.21	162.8	115.61	38.77	44.79	43.58	1.73975	2.04527e-35	RPP1A	KZV29930.1 hypothetical protein F511_28441 [Dorcoceras hygrometricum]
Unigene0002303	48.12	50.7	57.65	0	0.47	0.1	8.10071	2.48637e-35	LTP-2	XP_011097163.1 non-specific lipid-transfer protein 2 [Sesamum indicum]
Unigene0033509	62.73	67.06	63.44	32.27	30.88	29.01	1.06811	3.32704e-35	HXK2	XP_011093636.1 hexokinase-1 [Sesamum indicum]
Unigene0027706	20.08	23.96	19.18	8.51	8.38	7.9	1.35062	3.39188e-35	At5g08430	XP_011087407.1 uncharacterized protein At5g08430 [Sesamum indicum]
Unigene0004291	4.23	3.61	7.52	0.11	0.07	0.09	5.83007	6.7017e-35	RE2	RHN67289.1 putative RNA-directed DNA polymerase [Medicago truncatula]
Unigene0032426	3.62	3.16	4.51	0.25	0.2	0.21	4.09644	7.25903e-35	At4g18820	XP_011085319.1 protein STICHEL-like 4 [Sesamum indicum]
Unigene0031661	443.46	421.18	271.32	64.35	73.02	78.45	2.39601	8.08377e-35	At1g54200	XP_022860858.1 protein BIG GRAIN 1-like B [Olea europaea var. sylvestris] [Olea europaea]
Unigene0027720	16.29	14.53	13.6	0.03	0.07	0.06	8.11699	9.14547e-35	--	PIN24152.1 Ubiquitinyl hydrolase 1 [Handroanthus impetiginosus]
Unigene0001477	27.35	32.37	13.65	0.93	1.32	1.13	4.4401	1.1459e-34	TCX2	KZV23929.1 hypothetical protein F511_23290 [Dorcoceras hygrometricum]
Unigene0014420	12.94	13.07	12.05	0.64	0.92	0.79	4.01754	1.76717e-34	SPH2	PIN26862.1 hypothetical protein CDL12_00355 [Handroanthus impetiginosus]
Unigene0021146	48.07	41.66	41.7	0.31	0.4	0	7.53226	2.94586e-34	LTP-2	XP_011097163.1 non-specific lipid-transfer protein 2 [Sesamum indicum]
Unigene0034212	10.34	14.11	16.72	0.09	0.23	0.2	6.30694	3.20939e-34	VIT_17s0000g00560	XP_012842760.1 PREDICTED: CASP-like protein 1F2 isoform X1 [Erythranthe guttata]
Unigene0011699	18.11	12.82	14.31	2.23	2.96	2.53	2.55093	3.72608e-34	dennd5b	XP_011083072.1 uncharacterized protein LOC105165685 [Sesamum indicum]
Unigene0028276	33.16	63.91	83.74	5.05	4.31	6.37	3.52288	4.72852e-34	ER1	PIN23993.1 Serine/threonine protein kinase [Handroanthus impetiginosus]
Unigene0019243	149.32	179.23	143.04	63	56.74	65.43	1.34868	4.97543e-34	PAS2	GER50350.1 very-long-chain (3R)-3-hydroxyacyl-[acyl-carrierprotein] dehydratase PASTICCINO 2 [Striga asiatica]
Unigene0028239	28.29	32.71	33.43	9.08	10.75	9.89	1.66781	5.10208e-34	AHP1	GER32976.1 histidine-containing phosphotransfer protein [Striga asiatica]
Unigene0001939	13.63	15.5	17.69	2.27	1.89	3.2	2.66935	8.47542e-34	SRS5	GER35510.1 lateral root primordium family protein [Striga asiatica]
Unigene0008496	29.46	34.34	30.86	10.7	13.48	11.81	1.39516	1.00487e-33	VIL1	XP_011093310.1 VIN3-like protein 1 [Sesamum indicum]
Unigene0032691	48.19	39.92	53.96	6.66	10.76	7.74	2.4974	1.02942e-33	STP13	XP_011090738.1 sugar transport protein 13 [Sesamum indicum]
Unigene0002885	15.42	16.47	17.54	5.11	3.94	5.62	1.75252	1.28066e-33	NET1B	PIN17785.1 E3 ubiquitin ligase involved in syntaxin degradation [Handroanthus impetiginosus]
Unigene0030273	379.54	388.84	370.43	127.17	151.13	167.43	1.35329	1.97899e-33	--	PIN12959.1 hypothetical protein CDL12_14419 [Handroanthus impetiginosus]
Unigene0016625	39.77	27.65	40.23	6.72	5.09	6.65	2.54387	2.45927e-33	--	GAU26268.1 hypothetical protein TSUD_224590 [Trifolium subterraneum]
Unigene0026178	25.02	23.24	38.11	2.22	1.1	2.85	3.80719	2.6964e-33	LECRK81	XP_011094691.1 L-type lectin-domain containing receptor kinase VIII.1 [Sesamum indicum]
Unigene0004348	44.61	47.65	42.71	17.06	19.37	18.08	1.30805	3.8736e-33	--	PIM98866.1 hypothetical protein CDL12_28650 [Handroanthus impetiginosus]
Unigene0031221	20.86	21.15	13.41	2.33	1.76	2.52	3.06768	4.36883e-33	CYP81Q32	XP_022843744.1 cytochrome P450 81E8-like [Olea europaea var. sylvestris] [Olea europaea]
Unigene0031883	1248.5	1107.67	1264.89	483.62	535.08	461.65	1.29047	5.3618e-33	BACOVA_02659	XP_011089012.2 uncharacterized protein LOC105170099 [Sesamum indicum]
Unigene0021012	6.13	3.28	3.35	0.11	0.1	0.07	5.51006	7.08102e-33	TY3B-G	XP_028962178.1 LOW QUALITY PROTEIN: uncharacterized protein LOC114826270 [Malus domestica]
Unigene0017689	38.56	44.68	29.68	4.42	5.11	7.5	2.72915	7.33337e-33	VQ22	PIN26762.1 hypothetical protein CDL12_00481 [Handroanthus impetiginosus]
Unigene0009699	20.74	27.4	32.47	0.94	1.52	1.57	4.32211	8.00812e-33	--	-
Unigene0000962	16.84	13.11	12.98	2.52	2.31	2.09	2.63314	1.22677e-32	EIF4A1	OVA08406.1 Helicase [Macleaya cordata]
Unigene0020022	15.14	14.32	19.6	2.66	1.87	2.52	2.79885	1.24652e-32	AAP1	XP_012857765.1 PREDICTED: amino acid permease 8-like isoform X2 [Erythranthe guttata]
Unigene0000662	14.33	15.92	13.01	1.8	2.47	1.22	2.97816	1.54881e-32	WRKY28	XP_009760855.1 PREDICTED: probable WRKY transcription factor 71 [Nicotiana sylvestris]
Unigene0017556	22.73	7.87	23.58	0.31	0.53	0.19	5.71704	1.54881e-32	NPF2.10	XP_011087209.1 protein NRT1/ PTR FAMILY 2.10-like [Sesamum indicum]
Unigene0010734	142.38	123.6	102.42	37.6	36.67	36.1	1.73892	1.78965e-32	AAE2	XP_011072225.1 probable acyl-activating enzyme 1, peroxisomal [Sesamum indicum]
Unigene0033742	35.54	35.08	34.54	13.92	14.27	14.21	1.31045	1.80945e-32	TIM23-1	GER53538.1 mitochondrial import inner membrane translocase [Striga asiatica]
Unigene0011352	63.82	65.14	73.68	33.12	29.97	32.01	1.0914	1.9816e-32	ndhM	XP_011102142.1 probable receptor-like serine/threonine-protein kinase At5g57670 [Sesamum indicum]
Unigene0029441	23.03	11.77	21.06	0.26	0.48	0.12	6.02134	2.39554e-32	--	XP_011089496.1 suppressor of disruption of TFIIS [Sesamum indicum]
Unigene0029644	39.75	34.35	36.49	9.69	8.86	6.88	2.12062	2.72385e-32	HIPP39	PSR93443.1 Heavy metal-associated isoprenylated plant protein [Actinidia chinensis var. chinensis] [Actinidia chinensis]
Unigene0011819	30.11	22.84	35.87	0.8	2.23	0.67	4.58529	3.33905e-32	--	XP_011072365.1 uncharacterized protein LOC105157642 [Sesamum indicum]
Unigene0032047	32.18	36.64	32.25	15.5	15.4	16.76	1.0845	3.71623e-32	PDRP1	XP_022878015.1 pyruvate, phosphate dikinase regulatory protein 1, chloroplastic isoform X1 [Olea europaea var. sylvestris] [Olea europaea]
Unigene0000095	29.13	31.46	28.62	9.72	11.22	12.62	1.41046	4.02084e-32	--	KAF3443873.1 hypothetical protein FNV43_RR13563 [Rhamnella rubrinervis]
Unigene0015325	8.91	9.13	8	0.74	0.43	1.13	3.50102	5.19082e-32	GT6	PIN04620.1 UDP-glucuronosyl and UDP-glucosyl transferase [Handroanthus impetiginosus]
Unigene0016828	16.23	11.46	9.88	0.35	0.45	0.33	5.05519	6.21771e-32	ACBP3	XP_011097232.1 acyl-CoA-binding domain-containing protein 3 [Sesamum indicum]
Unigene0030293	20.27	22.33	22.97	7.16	8.4	8.28	1.45965	7.24577e-32	MIEL1	XP_011079733.1 E3 ubiquitin-protein ligase MIEL1 [Sesamum indicum]
Unigene0023126	59.33	58.34	92.53	12.94	12.69	15.69	2.34685	7.40634e-32	CYP80B2	XP_012837735.1 PREDICTED: probable (S)-N-methylcoclaurine 3'-hydroxylase isozyme 2 [Erythranthe guttata]
Unigene0014105	63.39	76.41	73.21	32.85	32.67	37.04	1.05445	8.71127e-32	At2g40140	XP_011084902.1 zinc finger CCCH domain-containing protein 29 [Sesamum indicum]
Unigene0001230	7.85	6.91	5.04	0.22	0.47	0.4	4.1831	9.96535e-32	SFH13	PIN25120.1 Phosphatidylinositol transfer protein SEC14 [Handroanthus impetiginosus]
Unigene0029405	15.17	27.77	11.31	0.97	0.5	0.85	4.54743	1.05028e-31	MYB306	AKV71948.1 R2R3-MYB protein [Rehmannia glutinosa]
Unigene0026330	44.05	42.54	46.66	21.89	22.12	22.45	1.00358	1.27772e-31	FPS1	XP_022879277.1 farnesyl pyrophosphate synthase 1 [Olea europaea var. sylvestris] [Olea europaea]
Unigene0007644	23.34	21.83	26.68	5.77	5.7	3.74	2.23997	1.43994e-31	MORC6	XP_011071897.1 protein MICRORCHIDIA 6 [Sesamum indicum]
Unigene0024423	100.31	103.57	79.11	27.72	28.86	21.71	1.85385	1.45757e-31	ARF18	XP_011089288.1 auxin response factor 18 isoform X2 [Sesamum indicum]
Unigene0023359	12.77	13.94	12.67	0.18	0.16	0.69	5.25675	1.49227e-31	--	PIN21106.1 hypothetical protein CDL12_06207 [Handroanthus impetiginosus]
Unigene0019117	6.71	6.81	7.83	0.61	0.61	0.9	3.3321	1.63691e-31	TBL10	XP_011090776.1 protein trichome birefringence-like 10 [Sesamum indicum]
Unigene0027265	101.26	115.49	99.12	38.76	44.22	47.55	1.27495	2.06714e-31	TPR1	XP_011092107.1 topless-related protein 3 [Sesamum indicum]
Unigene0023645	23.98	18.77	18.17	5.15	5.56	4.52	2	2.15536e-31	BBE1	XP_011071422.1 reticuline oxidase-like [Sesamum indicum]
Unigene0029410	26.16	36.64	23.05	3.4	4.36	5.09	2.74005	2.61353e-31	Os04g0179200	XP_011094269.1 secoisolariciresinol dehydrogenase-like [Sesamum indicum]
Unigene0026886	43.73	45.91	39.71	15.98	16.8	18.83	1.32556	4.37477e-31	CYP94A1	PIN04067.1 Cytochrome P450 CYP4/CYP19/CYP26 subfamily [Handroanthus impetiginosus]
Unigene0035391	1624.75	2002.43	938.2	131.4	144.8	221.12	3.19849	4.4089e-31	At2g43860	XP_011085052.1 polygalacturonase-like [Sesamum indicum]
Unigene0012063	20.14	22.23	12.92	1.17	2.18	1.9	3.39663	8.04942e-31	ZOG1	XP_011075345.1 zeatin O-glucosyltransferase-like [Sesamum indicum]
Unigene0008365	4259.83	4438.27	3783.19	1699.54	1891.26	2013.79	1.15509	9.93073e-31	--	TEY60938.1 hypothetical protein Saspl_033217 [Salvia splendens]
Unigene0004411	6.69	7.03	7.6	2.12	1.69	1.88	1.90571	1.05147e-30	CLF	XP_011099117.1 histone-lysine N-methyltransferase CLF isoform X2 [Sesamum indicum]
Unigene0025556	7.27	8.78	7.86	0.91	1.44	0.82	2.91506	1.39929e-30	--	PIM97845.1 Glutaredoxin [Handroanthus impetiginosus]
Unigene0029274	9.29	11.68	7.01	1.02	1.67	1.3	2.80994	1.45248e-30	ABCB9	PIN04048.1 Multidrug/pheromone exporter, ABC superfamily [Handroanthus impetiginosus]
Unigene0014349	61.48	63.94	72.03	18.19	15.5	23.44	1.78917	2.17699e-30	PLC4	ABU53666.1 phospholipase C [Torenia fournieri]
Unigene0017275	12.95	12.36	17.86	1.44	1.55	0.83	3.49838	2.43402e-30	ERF5	XP_011101098.1 ethylene-responsive transcription factor 5 [Sesamum indicum]
Unigene0011044	6.23	5.21	3.5	0.1	0.16	0.11	5.33551	3.24302e-30	MYB63	XP_011086359.1 transcription factor MYB63 [Sesamum indicum]
Unigene0024064	41.78	52.54	31.48	8.35	10.39	9.22	2.1697	4.11854e-30	--	PIN05667.1 hypothetical protein CDL12_21789 [Handroanthus impetiginosus]
Unigene0031535	31.94	42.46	39.42	6.95	7.44	10.41	2.19834	4.1508e-30	--	XP_011073513.1 uncharacterized protein LOC105158445 [Sesamum indicum]
Unigene0029713	136.65	112.72	115.86	49.02	45.49	45.4	1.38431	4.34907e-30	At1g06620	XP_017974608.1 PREDICTED: uncharacterized protein LOC18603192 [Theobroma cacao]
Unigene0023805	15.88	15.07	19.39	4.13	3.73	3.78	2.11261	7.38814e-30	IP5P8	PIN11195.1 Inositol polyphosphate 5-phosphatase [Handroanthus impetiginosus]
Unigene0033244	106.33	156.3	91.21	23.79	27.6	28.83	2.14106	1.08951e-29	URGT6	PIN26882.1 Glucose-6-phosphate/phosphate and phosphoenolpyruvate/phosphate antiporter [Handroanthus impetiginosus]
Unigene0026167	40.68	38.27	40.2	15.64	15.86	18.5	1.25278	1.09031e-29	--	XP_011088515.1 uncharacterized protein LOC105169721 [Sesamum indicum]
Unigene0013077	34.35	26.56	41.74	3.88	5.29	3.82	2.98226	1.12429e-29	--	EYU36368.1 hypothetical protein MIMGU_mgv1a017259mg [Erythranthe guttata]
Unigene0022328	119.93	103.83	101.62	39.59	41.79	34.33	1.49161	1.49607e-29	APA1	XP_011096039.2 aspartic proteinase-like [Sesamum indicum]
Unigene0014014	4.21	4.71	5.99	0.64	0.52	0.4	3.25666	1.56319e-29	PUB52	EYU20190.1 hypothetical protein MIMGU_mgv1a001539mg [Erythranthe guttata]
Unigene0029041	7.7	8.36	10.6	0.83	1.08	0.92	3.2358	1.9864e-29	ARR9	PIN18316.1 hypothetical protein CDL12_09021 [Handroanthus impetiginosus]
Unigene0001329	13.54	18.35	9.45	0.69	0.94	1.45	3.74654	2.13427e-29	ABF2	XP_011083869.1 bZIP transcription factor 23 [Sesamum indicum]
Unigene0031040	9.45	16.09	20.95	1.43	1.64	1.93	3.21692	2.966e-29	At3g47420	PIN22398.1 Permease of the major facilitator superfamily [Handroanthus impetiginosus]
Unigene0002594	282.75	261.63	220.01	95.16	102.92	96.4	1.37614	3.14619e-29	P4H10	PIN07833.1 Prolyl 4-hydroxylase alpha subunit [Handroanthus impetiginosus]
Unigene0028032	23.27	22.52	17.21	4.61	4.55	5.85	2.06943	3.20535e-29	ARR2	PSR97990.1 Two-component response regulator like [Actinidia chinensis var. chinensis] [Actinidia chinensis]
Unigene0033699	33.89	32.7	41.43	14.07	13.83	12.87	1.40572	3.2501e-29	HSL2	KZV21326.1 hypothetical protein F511_24507 [Dorcoceras hygrometricum]
Unigene0000247	48.38	63.66	37.48	7.22	10.37	9.58	2.46025	3.31792e-29	--	XP_012831835.1 PREDICTED: uncharacterized protein LOC105952801 isoform X2 [Erythranthe guttata]
Unigene0004535	91.81	91.63	95.85	45.43	36.66	43.51	1.15293	3.77498e-29	SPS1	O04932.1 RecName: Full=Probable sucrose-phosphate synthase 1; AltName: Full=UDP-glucose-fructose-phosphate glucosyltransferase 1 [Craterostigma plantagineum]
Unigene0008656	6.11	5.47	11.3	0.19	0.28	0.24	5.01012	5.02758e-29	RAM1	PIN04940.1 hypothetical protein CDL12_22526 [Handroanthus impetiginosus]
Unigene0010265	10.36	12.58	10.79	2.79	2.18	2.86	2.10695	8.03236e-29	--	PIN07498.1 hypothetical protein CDL12_19935 [Handroanthus impetiginosus]
Unigene0000207	31.54	36.24	30.39	10.98	12.42	13.35	1.41754	8.24425e-29	--	GER38456.1 galactose oxidase/kelch repeat superfamily protein [Striga asiatica]
Unigene0028599	14.35	18.45	16.15	5.27	5.94	5.18	1.57849	8.63698e-29	--	-
Unigene0030529	3.7	3.35	3.73	0.24	0.17	0.17	4.21616	8.71904e-29	BEL1	XP_018829277.1 PREDICTED: homeobox protein BEL1 homolog isoform X1 [Juglans regia]
Unigene0035930	53.39	44.98	29.25	5.56	7.51	5.86	2.75311	9.4738e-29	ATL42	KAA8523148.1 hypothetical protein F0562_009571 [Nyssa sinensis]
Unigene0025319	15.03	13.79	14.47	6.04	6.19	6.51	1.20791	1.09032e-28	FRK2	XP_012837491.1 PREDICTED: uncharacterized protein LOC105958036 [Erythranthe guttata]
Unigene0031962	94.37	134.31	83.39	20.5	23.61	14.91	2.40259	1.72555e-28	JA2L	PIN22627.1 hypothetical protein CDL12_04665 [Handroanthus impetiginosus]
Unigene0035572	46.52	52.04	41.28	15.51	18.54	14.78	1.51794	2.57588e-28	RVE1	XP_020548215.1 protein REVEILLE 7-like isoform X2 [Sesamum indicum]
Unigene0021633	12.27	14.48	13.38	2.91	3.76	4.19	1.88566	2.92603e-28	SUC4	XP_012841262.1 PREDICTED: sucrose transport protein SUC4 [Erythranthe guttata]
Unigene0026781	483.67	202.22	325.73	2.32	4.55	1.27	6.95742	3.08746e-28	AS	PIN25447.1 Asparagine synthase (glutamine-hydrolyzing) [Handroanthus impetiginosus]
Unigene0007628	17.82	21	17.65	6.24	7.89	7.49	1.38512	4.386e-28	At5g35170	XP_011078588.1 adenylate kinase 5, chloroplastic isoform X3 [Sesamum indicum]
Unigene0018296	70.53	67.68	36.73	7.01	9.79	7.54	2.84546	4.57409e-28	--	XP_011070317.1 uncharacterized protein LOC105156004 [Sesamum indicum]
Unigene0026112	10.2	10.09	13.05	3.85	4.08	3.45	1.55075	4.9497e-28	CCB4	PIN18034.1 hypothetical protein CDL12_09290 [Handroanthus impetiginosus]
Unigene0014127	21.43	23.48	22.73	10.12	9.22	9.04	1.253	5.38356e-28	At1g16220	TEY69981.1 hypothetical protein Saspl_017389 [Salvia splendens]
Unigene0032137	8.21	9.48	9.34	1.54	0.8	1.51	2.81163	8.52721e-28	ATL46	XP_020554963.1 RING-H2 finger protein ATL46-like [Sesamum indicum]
Unigene0009809	4.11	4.08	4.34	0.6	0.69	0.55	2.76761	9.52046e-28	CRY2	PIN22456.1 Deoxyribodipyrimidine photolyase/cryptochrome [Handroanthus impetiginosus]
Unigene0001475	11.44	13.19	11.18	2.55	3.76	3.24	1.90679	9.55716e-28	TCX2	XP_011090684.1 LOW QUALITY PROTEIN: protein tesmin/TSO1-like CXC 2 [Sesamum indicum]
Unigene0024066	111.51	147.28	280.22	22.95	17.8	19.45	3.16248	1.1229e-27	NCED1	XP_011082846.1 9-cis-epoxycarotenoid dioxygenase NCED1, chloroplastic [Sesamum indicum]
Unigene0010878	12.18	16.89	13.02	2.88	3.02	3.25	2.20163	1.41542e-27	GATA5	XP_012853575.1 PREDICTED: GATA transcription factor 5 isoform X1 [Erythranthe guttata]
Unigene0017912	10.88	7.21	13.84	1.02	0.76	0.58	3.75805	1.51903e-27	CYCD1-1	XP_011086502.1 cyclin-D1-1 [Sesamum indicum]
Unigene0021025	46.87	50.16	55.01	20.52	20.04	20.05	1.32682	1.6242e-27	--	-
Unigene0029283	12.5	13.41	11.67	3.83	4.47	3.83	1.63139	2.05856e-27	THA8	XP_011088727.1 pentatricopeptide repeat-containing protein At1g62350 isoform X1 [Sesamum indicum]
Unigene0032643	18.37	17.92	30.47	2.87	2.18	3.14	3.02705	2.21542e-27	YAB1	XP_011090395.1 axial regulator YABBY 1 [Sesamum indicum]
Unigene0025280	10.81	9.74	9.13	1.07	0.74	0.32	3.80057	2.25596e-27	--	-
Unigene0027260	10.7	9.38	8.23	2.1	1.61	2.34	2.2263	2.4398e-27	NEAP2	QCE07229.1 hypothetical protein DEO72_LG9g2246 [Vigna unguiculata]
Unigene0001411	10.28	10.12	12.3	3.23	2.29	2.95	1.94886	2.44406e-27	ORP2A	XP_011070101.1 oxysterol-binding protein-related protein 2A isoform X1 [Sesamum indicum]
Unigene0030959	316.18	280.51	321.37	121.04	126.74	98.6	1.40623	2.70955e-27	OPT4	XP_011087976.1 oligopeptide transporter 4 [Sesamum indicum]
Unigene0001831	10.14	9.83	12.46	0.16	0.35	0.06	5.83022	2.74952e-27	ATL20	XP_020552781.1 RING-H2 finger protein ATL20-like isoform X1 [Sesamum indicum]
Unigene0021622	17.86	27.74	23.92	0.09	0	0.6	6.65469	2.75208e-27	LTP1	ABP01769.1 lipid transfer protein 2 [Salvia miltiorrhiza]
Unigene0025073	2.92	3.36	3.35	0.06	0.08	0.13	5.1565	3.33189e-27	--	-
Unigene0008246	31.34	21.41	40.85	6.1	5.11	4.61	2.56476	3.79454e-27	ABCG36	XP_011080481.1 ABC transporter G family member 35-like [Sesamum indicum]
Unigene0007387	14.89	18.42	17.54	6.62	6.66	6.74	1.34481	3.96322e-27	AGD8	PIN25570.1 putative GTPase-activating protein [Handroanthus impetiginosus]
Unigene0001371	11.23	14.38	10.43	0.94	1.26	2.01	3.09771	3.9702e-27	BT3	XP_012839051.1 PREDICTED: BTB/POZ and TAZ domain-containing protein 3 [Erythranthe guttata]
Unigene0024016	27.12	44.16	65.46	5.21	5.31	3.72	3.26341	4.1271e-27	--	-
Unigene0030986	10.02	16.51	8.64	0.51	0.33	0.68	4.5322	4.89299e-27	--	XP_012845895.1 PREDICTED: uncharacterized protein LOC105965893 [Erythranthe guttata]
Unigene0003903	6.81	7.45	6.54	0.63	0.41	0.84	3.46778	4.98507e-27	--	XP_012855571.1 PREDICTED: F-box protein At5g07610-like [Erythranthe guttata]
Unigene0026511	20.77	18.63	20.85	9.13	8.32	7.82	1.25354	5.35858e-27	--	EYU20394.1 hypothetical protein MIMGU_mgv1a000210mg [Erythranthe guttata]
Unigene0014486	64.96	59.98	47.13	6.89	5.4	11.45	2.8576	5.38008e-27	--	-
Unigene0010881	8.75	5.87	7.03	0.26	0.07	0	6.03576	5.50647e-27	NCED2	XP_020553830.1 probable 9-cis-epoxycarotenoid dioxygenase NCED5, chloroplastic [Sesamum indicum]
Unigene0002310	6.26	6.8	5.58	0.11	0.42	0.24	4.5974	5.53831e-27	--	XP_011094405.1 uncharacterized protein LOC105174110 [Sesamum indicum]
Unigene0026121	612.29	467.82	649.12	184.7	174.43	142.33	1.78592	5.56244e-27	ABCG15	XP_011080364.1 ABC transporter G family member 12 [Sesamum indicum]
Unigene0032626	68.12	134.64	87.84	18.41	17.09	21.41	2.35228	6.4399e-27	--	XP_022881055.1 LIM domain-containing protein A-like [Olea europaea var. sylvestris] [Olea europaea]
Unigene0031268	61.12	66.67	53.74	25.74	28.17	24.89	1.20394	6.82318e-27	COI1	ARB15806.1 COI1 [Salvia miltiorrhiza]
Unigene0031315	31.08	35.99	34.55	13.18	13.01	16.02	1.26753	7.66152e-27	mfsd5	XP_012858517.1 PREDICTED: molybdate-anion transporter-like [Erythranthe guttata]
Unigene0024731	46.13	30.02	26.2	4.19	2.2	3.7	3.34251	8.51393e-27	EP3	XP_031124070.1 endochitinase EP3-like [Ipomoea triloba]
Unigene0027816	16.8	15.87	19.56	6.92	6.83	6.22	1.38704	1.33905e-26	SWI3D	XP_011088374.1 SWI/SNF complex subunit SWI3D [Sesamum indicum]
Unigene0028985	23.06	21.68	18.99	8.1	7.07	7.17	1.51234	1.79921e-26	AHL5	TEY11183.1 hypothetical protein Saspl_044744 [Salvia splendens]
Unigene0002998	33.93	54.6	23.04	5.03	3.75	3.74	3.15564	1.82579e-26	UGT86A1	XP_012836028.1 PREDICTED: UDP-glycosyltransferase 86A1-like [Erythranthe guttata]
Unigene0001594	31.63	29.06	32.18	6.7	9.82	9.18	1.85344	2.00243e-26	IPI2	THG02744.1 hypothetical protein TEA_000389 [Camellia sinensis var. sinensis] [Camellia sinensis]
Unigene0018178	9.54	7.45	11.24	0.79	0.91	1.12	3.32346	2.46288e-26	FH5	XP_020553859.1 formin-like protein 5 isoform X2 [Sesamum indicum]
Unigene0032752	16.17	17.65	19.35	6.61	7.3	7.69	1.29958	3.00204e-26	fmdA	EOX91646.1 Acetamidase/Formamidase family protein isoform 1 [Theobroma cacao]
Unigene0027434	20.71	23.03	24.71	6.41	7.05	4.78	1.90794	3.03915e-26	NRP1	XP_011071637.1 NAP1-related protein 2-like [Sesamum indicum]
Unigene0034821	73.86	90.91	99.78	32.67	37.67	35.07	1.32753	3.23709e-26	PPC	PIN16568.1 Phosphoenolpyruvate carboxylase [Handroanthus impetiginosus]
Unigene0024813	46.3	41.56	53.68	18.96	16.54	18.4	1.39285	3.49481e-26	CDA1	PIN08384.1 Cytidine deaminase [Handroanthus impetiginosus]
Unigene0008573	14.3	15.76	13.41	4.08	4.77	5.32	1.61718	3.74182e-26	--	-
Unigene0005880	1179.81	1100.84	1036.19	502.16	509.39	579.99	1.05939	4.04429e-26	RD21B	XP_011069730.1 low-temperature-induced cysteine proteinase-like [Sesamum indicum]
Unigene0001572	15.68	19.18	16.41	5.58	5.89	4.52	1.68094	4.75527e-26	UGT94E5	BBK26430.1 UDP-glycosyltransferase [Sesamum indicum]
Unigene0024384	8.55	14.71	15.74	1.17	1.29	1.6	3.26392	4.81133e-26	ARR5	XP_011071752.1 two-component response regulator ARR5 [Sesamum indicum]
Unigene0020507	3.33	5.14	4.51	1.19	1.02	1.17	1.9412	4.90717e-26	fadD28	XP_020549988.1 uncharacterized protein LOC105163603 [Sesamum indicum]
Unigene0028517	44.6	39.82	37.16	7.58	12.23	10.39	2.00929	4.91683e-26	--	XP_012834665.1 PREDICTED: uncharacterized protein LOC105955483 [Erythranthe guttata]
Unigene0015336	65.31	55.97	100.62	15.07	10.33	11.64	2.58275	5.42922e-26	PGIP1	PIN12702.1 hypothetical protein CDL12_14687 [Handroanthus impetiginosus]
Unigene0029074	27.64	24.71	29.62	9.54	10.52	7.89	1.55225	6.17778e-26	LHW	PIN10642.1 hypothetical protein CDL12_16763 [Handroanthus impetiginosus]
Unigene0016003	9.45	16.25	8.79	0.99	1.19	1.06	3.41211	7.43234e-26	--	-
Unigene0034270	22.27	26	26.61	6.07	7.73	7.64	1.80428	7.50277e-26	BCA2	GER32240.1 carbonic anhydrase [Striga asiatica]
Unigene0010443	83.6	74.98	84.55	34.78	33.1	27.32	1.35269	7.68222e-26	PUP5	PIN00953.1 hypothetical protein CDL12_26546 [Handroanthus impetiginosus]
Unigene0028096	31.85	35.21	27.79	14.32	12.88	14.35	1.1908	8.46798e-26	MAF1	XP_011075765.1 uncharacterized protein LOC105160192 isoform X1 [Sesamum indicum]
Unigene0019397	111.24	103.26	91.82	24.58	24.56	35.91	1.84866	9.33611e-26	CXE18	XP_011083238.1 probable carboxylesterase 18 [Sesamum indicum]
Unigene0035137	95.06	115.57	87.87	24.28	21.11	34.03	1.91016	1.05392e-25	EXPB3	XP_011085969.1 expansin-B3-like [Sesamum indicum]
Unigene0034601	2780.12	1849.28	2035.91	580.07	647.27	651.29	1.82699	1.05791e-25	CRSP	XP_011083454.2 CO(2)-response secreted protease [Sesamum indicum]
Unigene0010512	14.45	14.06	8.62	0.05	0.21	0.24	6.21451	1.31951e-25	--	XP_011094663.1 uncharacterized protein LOC105174308 [Sesamum indicum]
Unigene0026336	21.24	18.22	23.64	4.67	3	4.21	2.40911	1.36309e-25	--	TEY19228.1 hypothetical protein Saspl_048600 [Salvia splendens]
Unigene0018166	15.31	26.24	9	0.56	0.79	0.62	4.68144	1.38742e-25	ABR1	PIN11453.1 hypothetical protein CDL12_15943 [Handroanthus impetiginosus]
Unigene0000263	54.51	65.62	48.75	23.57	25.51	23.43	1.21975	1.48813e-25	AUR3	XP_011091018.1 serine/threonine-protein kinase Aurora-3 isoform X1 [Sesamum indicum]
Unigene0025894	7.21	7.94	7.46	2.76	2.97	2.69	1.42507	1.49991e-25	BRXL1	XP_011092615.1 protein Brevis radix-like 1 [Sesamum indicum]
Unigene0036242	22.44	25.87	19.39	6.13	5.41	7.38	1.83924	1.55828e-25	PDCB2	TEY86890.1 hypothetical protein Saspl_010918 [Salvia splendens]
Unigene0007434	12.5	12.85	7.69	1.28	1.85	1.26	2.91192	1.58204e-25	BHLH130	PIM98254.1 hypothetical protein CDL12_29268 [Handroanthus impetiginosus]
Unigene0031960	6.66	7.34	6.99	1.51	1.59	1.29	2.25741	1.58272e-25	TBL35	XP_011095070.1 protein trichome birefringence-like 35 [Sesamum indicum]
Unigene0004324	115.61	184.48	151.45	27.35	23.06	40.37	2.31441	1.59823e-25	DI19-1	XP_011087471.1 protein DEHYDRATION-INDUCED 19 homolog 3-like isoform X2 [Sesamum indicum]
Unigene0016593	57.67	55.45	75.97	23.58	23.33	20.74	1.48291	1.69349e-25	LHT1	XP_011098833.1 lysine histidine transporter 1 [Sesamum indicum]
Unigene0011738	5.36	6.99	6.3	1.44	1.62	1.56	2.01321	1.81598e-25	At2g02240	XP_022847439.1 F-box protein PP2-B10-like [Olea europaea var. sylvestris] [Olea europaea]
Unigene0024868	38.24	42.35	12.85	0.05	0.12	0.05	8.73039	2.11413e-25	TSJT1	XP_011069390.1 stem-specific protein TSJT1-like [Sesamum indicum]
Unigene0024690	13.04	13.19	9.19	1.86	1.58	2.52	2.57118	2.13971e-25	CBSDUF3	XP_011088024.1 DUF21 domain-containing protein At2g14520 [Sesamum indicum]
Unigene0027845	29.79	19.27	43.41	3.98	2.69	2.5	3.33399	2.1413e-25	At2g28490	XP_011089873.1 vicilin-like seed storage protein At2g28490 [Sesamum indicum]
Unigene0034294	37.61	36.24	38.49	0.95	1.41	3.91	4.16326	2.75863e-25	At5g41620	XP_011088935.1 uncharacterized protein At5g41620 [Sesamum indicum]
Unigene0014262	239.59	232.69	184.82	83.15	74.39	62.61	1.57763	4.00328e-25	TPS11	PIN14737.1 Trehalose-6-phosphate synthase component TPS1 [Handroanthus impetiginosus]
Unigene0018577	28.05	33.45	24.4	10	11.13	11.52	1.39558	6.12718e-25	DDS	XP_011096562.1 dammarenediol II synthase-like [Sesamum indicum]
Unigene0035413	9.76	9.05	12.12	2.04	2.1	2.14	2.30017	6.4174e-25	GDH2	XP_012829735.1 PREDICTED: glycine cleavage system H protein 2, mitochondrial [Erythranthe guttata]
Unigene0034574	5.22	5.81	2.34	0.23	0.39	0.32	3.83019	6.48746e-25	GIP	BAD34493.1 Gag-Pol [Ipomoea batatas]
Unigene0033302	696.93	572.28	651.07	0.95	5.5	1.14	7.983	7.94634e-25	DIR11	XP_011088570.1 dirigent protein 21 [Sesamum indicum]
Unigene0000781	27.39	28.12	24.12	13.23	11.72	12.65	1.08258	8.70498e-25	ABCG32	XP_011078340.1 ABC transporter G family member 32 [Sesamum indicum]
Unigene0031593	16.44	12.49	11.45	0.27	0.44	0	5.82968	8.95494e-25	DIR21	XP_012847347.1 PREDICTED: dirigent protein 1-like [Erythranthe guttata]
Unigene0030352	489.32	458.03	500.02	163.75	148.27	214.12	1.45992	9.46168e-25	CER1	XP_011085147.1 protein ECERIFERUM 1-like [Sesamum indicum]
Unigene0028021	47.71	55.84	26.62	7.44	7.89	7.52	2.51013	9.52648e-25	APSR1	XP_020554196.1 uncharacterized protein LOC105175929 [Sesamum indicum]
Unigene0031899	11.12	8.7	11.34	2.85	2.52	2.4	2.00371	1.19954e-24	GFPT2	PIN23642.1 Glucosamine 6-phosphate synthetase [Handroanthus impetiginosus]
Unigene0021341	10.12	16.48	7.97	0.69	0.9	0.71	3.90981	1.29302e-24	--	-
Unigene0015259	236.91	265.28	169.43	68.65	73.05	74.11	1.63788	1.40792e-24	PAP24	PIN03055.1 Purple acid phosphatase [Handroanthus impetiginosus]
Unigene0035273	3.33	5.47	5.02	0.23	0.26	0.29	4.14714	1.61824e-24	AAE14	KZV46273.1 2-succinylbenzoate--CoA ligase, chloroplastic/peroxisomal-like [Dorcoceras hygrometricum]
Unigene0000445	400.63	313.43	312.06	132.22	129.67	117.75	1.4345	1.63378e-24	ABCG11	XP_011072099.1 ABC transporter G family member 11 [Sesamum indicum]
Unigene0003238	14.38	15.93	14.92	0.96	0.28	0.72	4.52835	1.93509e-24	--	XP_012853445.1 PREDICTED: subtilisin-like protease SBT3.3 [Erythranthe guttata]
Unigene0017600	29.25	31.84	40.65	12.07	12.37	10.68	1.53452	2.28504e-24	CIPK23	XP_022847949.1 CBL-interacting serine/threonine-protein kinase 23-like isoform X1 [Olea europaea var. sylvestris] [Olea europaea]
Unigene0010875	16.66	21.74	16.84	5.75	4.39	5.87	1.78674	2.75926e-24	GATA5	XP_011100952.1 GATA transcription factor 5-like [Sesamum indicum]
Unigene0035618	135.83	141.05	95.44	30.33	40.69	35.76	1.8019	2.94623e-24	--	CBI28161.3 unnamed protein product, partial [Vitis vinifera]
Unigene0015491	2.96	3.62	2.69	0.32	0.27	0.46	3.14218	3.41288e-24	KIN12D	XP_011088306.1 kinesin-like protein KIN-12D [Sesamum indicum]
Unigene0017899	1887.11	3252.52	2576.35	774.19	781.86	880.61	1.66294	3.58932e-24	HSC-2	XP_011094842.1 heat shock cognate 70 kDa protein 2 [Sesamum indicum]
Unigene0031828	37.6	35.24	45.45	15.27	15.43	16.4	1.32853	4.00067e-24	--	XP_011080353.1 uncharacterized protein LOC105163626 [Sesamum indicum]
Unigene0027863	12.97	12.48	22.06	2.06	1.99	1.92	2.99243	4.34124e-24	SYT3	KZV26062.1 synaptotagmin-3 [Dorcoceras hygrometricum]
Unigene0034674	15.96	11.07	15.42	0.44	0.23	0.39	5.32363	6.48181e-24	--	XP_023770162.1 uncharacterized protein LOC111918772 [Lactuca sativa]
Unigene0006286	17.02	18.22	16.78	0.21	0.4	0.23	5.95253	6.60667e-24	--	-
Unigene0023740	7.59	9.03	6.05	1.77	1.21	1.54	2.32639	7.21679e-24	PUB33	PIN22832.1 Serine/threonine protein kinase [Handroanthus impetiginosus]
Unigene0029659	40.28	71.8	17.42	0	0.18	0.16	8.5732	7.34147e-24	--	-
Unigene0016141	19.42	31.38	21.97	3.53	4.25	4.33	2.58714	7.6249e-24	--	XP_011080774.1 dynein light chain 1, cytoplasmic-like [Sesamum indicum]
Unigene0036507	2304.38	1698.15	2232.76	649.04	466.48	410.62	2.03057	7.64782e-24	LTP1	PIM98593.1 hypothetical protein CDL12_28926 [Handroanthus impetiginosus]
Unigene0018339	22.21	25.03	25.07	9.86	11.54	11.13	1.15242	8.55349e-24	--	XP_020551042.1 uncharacterized protein LOC105160920 [Sesamum indicum]
Unigene0007182	436.49	386.75	293.28	101.24	80.69	117.04	1.90094	8.56552e-24	EXPA11	XP_011083443.1 expansin-A11 [Sesamum indicum]
Unigene0005815	13.42	16.36	9.88	2.33	1.75	1.45	2.84233	9.81949e-24	NAC056	PIN09583.1 hypothetical protein CDL12_17832 [Handroanthus impetiginosus]
Unigene0033411	18.56	26.21	19.68	7.39	7.59	8.48	1.45798	9.88022e-24	CNGC2	PIM99958.1 K+-channel ERG [Handroanthus impetiginosus]
Unigene0017976	30.11	42.68	17.02	1.16	1.02	2.92	4.13831	1.02058e-23	ORTH2	XP_011086888.1 E3 ubiquitin-protein ligase ORTHRUS 2 [Sesamum indicum]
Unigene0024036	30.86	24.93	23.37	0.02	0	0.03	10.6286	1.10783e-23	At1g03010	XP_020549940.1 BTB/POZ domain-containing protein At1g03010 isoform X3 [Sesamum indicum]
Unigene0019922	32.47	45.52	36.58	15.03	13.26	12.59	1.48676	1.12768e-23	--	PIN22538.1 hypothetical protein CDL12_04731 [Handroanthus impetiginosus]
Unigene0006494	7.53	9.89	4.75	0	0.21	0.03	6.52943	1.21491e-23	--	-
Unigene0010197	156.34	117.74	193.31	45.42	43.02	37.01	1.89751	1.22396e-23	KCR1	EYU44832.1 hypothetical protein MIMGU_mgv1a010167mg [Erythranthe guttata]
Unigene0007380	20.2	23.18	19.57	9.23	8.48	9.04	1.23467	1.42104e-23	At1g12200	XP_011090332.1 flavin-containing monooxygenase FMO GS-OX-like 2 [Sesamum indicum]
Unigene0027791	14.01	15.1	16.85	6.71	5.89	5.72	1.32696	1.48265e-23	Os03g0120900	XP_020550733.1 B3 domain-containing transcription factor NGA1 isoform X2 [Sesamum indicum]
Unigene0028891	36.93	44.37	27.75	10.09	10.65	11.49	1.75851	1.60713e-23	--	XP_011082428.1 uncharacterized protein LOC105165200 [Sesamum indicum]
Unigene0031629	10.71	11.32	10.71	1.42	1.45	2.38	2.64066	1.6397e-23	--	XP_028086973.1 HMG-Y-related protein B-like [Camellia sinensis]
Unigene0016209	256.37	191.92	139.67	46.21	44.15	44.89	2.12009	1.75507e-23	PAP20	XP_011094367.1 probable purple acid phosphatase 20 [Sesamum indicum]
Unigene0036365	46.08	46.98	42.45	21.76	23.32	19.57	1.06768	1.75677e-23	RGLG2	XP_011097362.1 E3 ubiquitin-protein ligase RGLG2-like [Sesamum indicum]
Unigene0015690	8.55	9.03	11.64	2.64	1.78	2.06	2.17289	2.14001e-23	--	XP_011072154.1 uncharacterized protein LOC105157443 [Sesamum indicum]
Unigene0025027	363.2	306.51	323.85	149.89	164.14	147.82	1.10518	2.19764e-23	CYP76T24	XP_012845086.1 PREDICTED: geraniol 8-hydroxylase-like [Erythranthe guttata]
Unigene0017265	89.58	84.86	64.91	30.36	28.83	26.46	1.4826	2.21018e-23	MAX2A	XP_012832933.1 PREDICTED: F-box/LRR-repeat MAX2 homolog A [Erythranthe guttata]
Unigene0005072	6.62	9.57	4.96	0.98	0.86	0.88	2.95898	2.22771e-23	WAV3	XP_011074291.1 uncharacterized protein LOC105159055 [Sesamum indicum]
Unigene0025589	59.39	58.37	42	18.17	17.12	18.38	1.57372	2.25151e-23	PID	PIN03081.1 putative serine/threonine protein kinase [Handroanthus impetiginosus]
Unigene0001171	63.31	57.29	79.69	26.64	26.35	25.8	1.34601	2.9855e-23	CSLD2	XP_011070339.1 cellulose synthase-like protein D3 [Sesamum indicum]
Unigene0014494	16.29	9.28	11.04	0.51	0	0.17	5.75056	3.07497e-23	CTL2	XP_011073914.1 chitinase-like protein 1 [Sesamum indicum]
Unigene0029919	7.25	7.63	10.68	1.77	1.39	1.73	2.38598	3.73454e-23	--	XP_011082523.1 probably inactive leucine-rich repeat receptor-like protein kinase At2g25790 [Sesamum indicum]
Unigene0024305	30.4	33.16	32.63	15.73	14.61	17.67	1.00255	3.80371e-23	SNAP33	XP_011072852.1 SNAP25 homologous protein SNAP33 [Sesamum indicum]
Unigene0020387	33.81	38	40.38	12.26	8.69	12.92	1.72786	4.57884e-23	RALFL32	PHT39320.1 hypothetical protein CQW23_22893 [Capsicum baccatum]
Unigene0030222	104.63	82.11	125.3	33.73	34.18	35.7	1.59057	4.61138e-23	SQE1	XP_012835368.1 PREDICTED: squalene monooxygenase-like [Erythranthe guttata]
Unigene0030565	55.13	61.68	66.05	28.3	24.57	31.27	1.11988	4.86255e-23	PLC2	XP_011076692.1 phosphoinositide phospholipase C 2-like [Sesamum indicum]
Unigene0006679	64.44	76.98	57.98	31.46	29.64	32.08	1.09757	6.28707e-23	PHYB	XP_011071377.1 phytochrome B [Sesamum indicum]
Unigene0017383	45.69	44.13	39.47	18.41	19.86	15.59	1.26332	6.70689e-23	At2g30600/At2g30610	PIM99645.1 putative hormone receptor interactor [Handroanthus impetiginosus]
Unigene0030574	3.83	5.48	4.44	0.52	0.8	0.43	2.974	9.15657e-23	EIL1	XP_022885070.1 protein ETHYLENE INSENSITIVE 3-like [Olea europaea var. sylvestris] [Olea europaea]
Unigene0000117	3.56	4.94	6.15	0.83	0.64	0.75	2.72227	1.00148e-22	WRKY22	PIN07897.1 hypothetical protein CDL12_19530 [Handroanthus impetiginosus]
Unigene0019367	16.69	22.35	16.62	0.09	0.23	0.2	6.74199	1.03563e-22	--	GER32220.1 serine protease inhibitor [Striga asiatica]
Unigene0024645	29.56	30.24	27.59	11.63	13.65	13.22	1.18261	1.04241e-22	KNAT7	XP_011072032.1 homeobox protein HD1 [Sesamum indicum]
Unigene0033615	3.8	4.67	4.67	0.13	0.22	0.11	4.83619	1.0495e-22	XXT1	XP_011090963.1 xyloglucan 6-xylosyltransferase 2 [Sesamum indicum]
Unigene0023839	42.27	46.5	32.99	13.49	15.26	16.05	1.44247	1.11465e-22	At1g01500	XP_011074539.1 uncharacterized protein At1g01500-like isoform X1 [Sesamum indicum]
Unigene0018547	40.72	38.21	22.51	7.16	8.17	6.75	2.19981	1.39419e-22	--	PNX96445.1 copia LTR rider [Trifolium pratense]
Unigene0016006	9.35	10.94	12.54	1.52	2.44	2.18	2.4187	1.62575e-22	CXE2	XP_011074454.1 probable carboxylesterase 2 [Sesamum indicum]
Unigene0006149	13.19	20.34	11.86	3.5	4.04	3.41	2.05144	1.73859e-22	--	XP_011077816.1 lipid droplet-associated hydrolase [Sesamum indicum]
Unigene0025797	4.13	5.11	2.39	0.31	0.24	0.33	3.7242	2.08195e-22	AP180	XP_011100365.1 clathrin coat assembly protein AP180-like [Sesamum indicum]
Unigene0029637	32.44	34.79	35.13	17.31	14.05	16.88	1.08535	2.25954e-22	ECI2	XP_024995684.1 enoyl-CoA delta isomerase 2, peroxisomal-like [Cynara cardunculus var. scolymus] [Cynara cardunculus]
Unigene0016072	96.64	119.43	75.78	28.39	26.53	34	1.71465	2.39464e-22	--	PIN00968.1 hypothetical protein CDL12_26528 [Handroanthus impetiginosus]
Unigene0023662	18.98	23.82	20.31	9.02	9.93	10.71	1.08935	2.51393e-22	--	XP_020553381.1 uncharacterized protein LOC105174401 isoform X1 [Sesamum indicum]
Unigene0022195	6.37	7.03	6.99	1.48	1.39	2.03	2.05701	3.02719e-22	BET12	XP_012842839.1 PREDICTED: bet1-like SNARE 1-2 [Erythranthe guttata]
Unigene0024549	88.52	62.72	72.68	25.06	23.52	27.59	1.55569	3.39789e-22	MLO1	GER28154.1 MLO-like protein, partial [Striga asiatica]
Unigene0036678	255.76	367.21	316.02	123.13	134.75	145.63	1.21851	4.71372e-22	SP1L1	XP_012080403.1 protein SPIRAL1-like 3 [Jatropha curcas]
Unigene0016222	38.99	40.87	35.67	13.65	17.94	17.15	1.24509	4.94175e-22	XTH30	XP_011086421.1 probable xyloglucan endotransglucosylase/hydrolase protein 30 [Sesamum indicum]
Unigene0029176	38.5	40.41	41.31	16.43	16.12	19.93	1.19584	4.96401e-22	MSBP2	PIN20908.1 putative steroid membrane receptor Hpr6.6/25-Dx [Handroanthus impetiginosus]
Unigene0024913	16.33	28.55	11.39	0.16	0.64	0.18	5.84344	5.19259e-22	SAUR32	PHU14463.1 Auxin-responsive protein SAUR32 [Capsicum chinense]
Unigene0018610	29.81	43.01	47.96	11.92	9.38	12.7	1.82877	6.41356e-22	NIP1-1	XP_012849365.1 PREDICTED: aquaporin NIP1-1-like [Erythranthe guttata]
Unigene0031900	28.33	29.27	20.43	4.02	3.77	6.73	2.42599	6.9131e-22	RER4	KZV24884.1 hypothetical protein F511_27974 [Dorcoceras hygrometricum]
Unigene0015163	9.98	11.59	11.43	3.55	4.4	3.34	1.54742	7.45566e-22	--	PIN25331.1 hypothetical protein CDL12_01928 [Handroanthus impetiginosus]
Unigene0026697	9.91	10.48	11.27	4.06	4.25	3.9	1.3746	8.58239e-22	COL15	TEY87875.1 hypothetical protein Saspl_012246 [Salvia splendens]
Unigene0019321	8.27	6.53	9.24	2.25	1.96	1.87	1.98329	1.30464e-21	R1A-10	XP_011072557.1 putative late blight resistance protein homolog R1B-16 isoform X1 [Sesamum indicum]
Unigene0026243	29.3	18.1	29.61	5.28	6.32	5.31	2.18717	1.42854e-21	At5g63670	XP_011074374.1 transcription elongation factor SPT4 homolog 2 [Sesamum indicum]
Unigene0002261	42.34	40.08	45.73	22.74	18.94	20.42	1.04517	1.45549e-21	PHS1	XP_012851351.1 PREDICTED: alpha-1,4 glucan phosphorylase L-1 isozyme, chloroplastic/amyloplastic [Erythranthe guttata]
Unigene0028569	6.45	8.04	7.03	2.12	1.9	2.31	1.7654	1.4975e-21	OFUT23	XP_022845883.1 O-fucosyltransferase 23-like [Olea europaea var. sylvestris] [Olea europaea]
Unigene0021054	7.32	7.22	5.17	0.98	1.43	1.25	2.42901	1.70674e-21	--	XP_011092191.1 uncharacterized protein LOC105172455 isoform X1 [Sesamum indicum]
Unigene0033647	19.09	24.91	22.5	8.14	6.92	6.09	1.6527	1.74176e-21	--	OIS98892.1 hypothetical protein A4A49_02415 [Nicotiana attenuata]
Unigene0029349	3.08	3.55	2.55	0.45	0.56	0.42	2.68248	2.83203e-21	--	GER43329.1 protein phosphatase 2C family protein [Striga asiatica]
Unigene0014236	5.59	4.27	9.33	0.24	0.04	0.15	5.47987	3.37156e-21	CUT1	XP_011076851.1 3-ketoacyl-CoA synthase 6-like [Sesamum indicum]
Unigene0013531	22.11	16.95	17.44	2.66	4.12	3.61	2.44306	3.62456e-21	--	-
Unigene0030893	6.08	7.53	6.42	2.11	2.04	1.8	1.7512	3.68892e-21	RAP2-7	XP_012834706.1 PREDICTED: ethylene-responsive transcription factor RAP2-7 isoform X2 [Erythranthe guttata]
Unigene0005162	19.19	29.29	35.24	5.03	5.44	3.04	2.63154	4.00873e-21	NAC081	XP_011099683.1 NAC domain-containing protein 2-like [Sesamum indicum]
Unigene0002082	6.82	6.73	7.87	0.15	0.13	0.11	5.77934	4.263e-21	--	XP_006355482.1 PREDICTED: uncharacterized protein LOC102579011 [Solanum tuberosum]
Unigene0000428	54.7	74.23	64.56	29.81	29.15	30.85	1.10731	4.86304e-21	NQR	XP_030966785.1 NADPH:quinone oxidoreductase-like [Quercus lobata]
Unigene0027309	28.85	18.16	32.45	4.91	5.33	3.32	2.55087	6.04469e-21	--	PIN14122.1 hypothetical protein CDL12_13241 [Handroanthus impetiginosus]
Unigene0003946	107	182.33	313.12	25.6	27.84	27.52	2.89556	6.09712e-21	LEA14-A	KZV42993.1 late embryogenesis (Lea)-like protein [Dorcoceras hygrometricum]
Unigene0012988	41.43	34.06	30.73	10.89	8.65	9.72	1.86005	8.03426e-21	--	XP_012837449.1 PREDICTED: uncharacterized protein LOC105957994 [Erythranthe guttata]
Unigene0035791	9.27	12.42	10.11	3.53	3.57	3.78	1.54735	8.23499e-21	PIX7	PIN17019.1 Serine/threonine protein kinase [Handroanthus impetiginosus]
Unigene0030995	3.39	4.99	3.69	1.1	1.02	1.3	1.81936	9.71892e-21	KAO1	RXH76049.1 hypothetical protein DVH24_001628 [Malus domestica]
Unigene0034388	34.37	17.95	33.1	0	0.28	0	8.253	9.7564e-21	--	TEY57334.1 type II keratin, basic [Salvia splendens]
Unigene0014338	123.81	68.52	135.94	20.75	19.93	25.56	2.30911	9.7564e-21	FRO2	XP_011092779.2 ferric reduction oxidase 2 [Sesamum indicum]
Unigene0027764	17.73	16.87	23.37	5.18	5.82	5.27	1.83309	1.01078e-20	Os04g0679100	PIN25031.1 Vesicle coat protein clathrin, light chain [Handroanthus impetiginosus]
Unigene0020337	13.2	11.72	6.68	1.48	1.35	0.95	3.06347	1.02828e-20	--	-
Unigene0006575	3.44	3.82	3.66	0.57	0.68	0.58	2.57706	1.12788e-20	ABCG11	KAA8546785.1 hypothetical protein F0562_003214 [Nyssa sinensis]
Unigene0004972	70.9	68.88	62.38	22.65	25.44	15.63	1.66568	1.33535e-20	RE1	BBG93649.1 wall-associated kinase 2 [Prunus dulcis]
Unigene0031504	268.51	227.23	156.91	62.63	61.98	63.76	1.79274	1.36794e-20	--	XP_011086107.1 stem-specific protein TSJT1-like [Sesamum indicum]
Unigene0023790	98.11	87.29	102.53	47.49	48.62	40.93	1.07112	1.39603e-20	GPDH	PIN17803.1 Glycerol-3-phosphate dehydrogenase/dihydroxyacetone 3-phosphate reductase [Handroanthus impetiginosus]
Unigene0027298	52.19	51.1	79.68	16.45	16.65	20.07	1.78292	1.4213e-20	HIPP26	GER42340.1 heavy metal transport/detoxification superfamily protein [Striga asiatica]
Unigene0001063	31.07	25.18	19.8	2.24	2.59	5.08	2.93999	1.42958e-20	At5g63180	PIN25521.1 Pectate lyase [Handroanthus impetiginosus]
Unigene0033977	7.37	6.48	4.2	0.23	0.56	0.45	3.86359	1.4394e-20	NPC2	GER55033.1 non-specific phospholipase C2 [Striga asiatica]
Unigene0016473	10.39	20.04	18.49	3.62	3.72	3.86	2.12693	1.55301e-20	WNK5	XP_011095119.1 probable serine/threonine-protein kinase WNK5 [Sesamum indicum]
Unigene0010067	34.5	25.39	28.07	10.37	9.01	8.08	1.67952	1.60907e-20	At4g12980	XP_022875218.1 cytochrome b561 and DOMON domain-containing protein At3g25290-like [Olea europaea var. sylvestris] [Olea europaea]
Unigene0033945	32.05	38.71	29.78	7.35	5.21	10.31	2.13624	2.02768e-20	GATA9	XP_011072418.1 GATA transcription factor 12-like [Sesamum indicum]
Unigene0027070	15.18	14.87	15.96	6.28	7.07	7.37	1.15092	2.14173e-20	QSOX1	XP_011070653.1 sulfhydryl oxidase 2 isoform X1 [Sesamum indicum]
Unigene0035833	31.63	32.63	30.3	4.2	4.03	8.56	2.49363	2.31165e-20	SCPL45	XP_011086871.1 serine carboxypeptidase-like 45 [Sesamum indicum]
Unigene0031117	65.04	61.72	65.32	29.59	29.57	36.15	1.01101	2.54965e-20	--	XP_012830405.1 PREDICTED: vacuolar protein 8 [Erythranthe guttata]
Unigene0028831	124.19	93.13	69.9	16.46	15.54	25.16	2.32908	2.56693e-20	UGT84A13	PIN07991.1 UDP-glucuronosyl and UDP-glucosyl transferase [Handroanthus impetiginosus]
Unigene0015468	12.92	17.49	17.89	4.8	5.3	4.74	1.70253	2.74291e-20	--	-
Unigene0015611	63.89	60.31	68.58	22.92	26.91	31.93	1.23749	3.41222e-20	At2g25737	XP_011081835.1 sulfite exporter TauE/SafE family protein 3 [Sesamum indicum]
Unigene0034361	30.45	29.29	34.73	14.75	10.7	12.82	1.30364	3.42316e-20	TRM32	XP_011092426.1 uncharacterized protein LOC105172605 [Sesamum indicum]
Unigene0019997	6.86	10.07	3.69	0.09	0	0.1	6.7619	3.47241e-20	At5g57480	XP_022867605.1 AAA-ATPase At5g57480-like [Olea europaea var. sylvestris] [Olea europaea]
Unigene0028055	221.93	223.23	174.55	99.23	94.41	100.54	1.07489	4.08682e-20	LACS6	XP_011092034.1 long chain acyl-CoA synthetase 6, peroxisomal-like [Sesamum indicum]
Unigene0009884	10.49	13.09	10.58	4.09	4.07	3.66	1.53108	4.43157e-20	Hgsnat	PIN01022.1 heparan-alpha-glucosaminide N-acetyltransferase [Handroanthus impetiginosus]
Unigene0023866	13.77	12.29	21.53	3.54	2.42	3.54	2.32466	4.52601e-20	XTH28	XP_011070536.1 probable xyloglucan endotransglucosylase/hydrolase protein 28 [Sesamum indicum]
Unigene0026831	27.5	38.96	37.68	10.6	12.52	13.95	1.4902	5.53406e-20	UNE12	GAV73442.1 HLH domain-containing protein [Cephalotus follicularis]
Unigene0031059	13.15	11.83	9.65	0.09	0.45	0.29	5.38277	6.51082e-20	--	-
Unigene0024032	108.94	100.31	68	24.12	26.22	31.61	1.75837	7.20322e-20	NPF3.1	XP_011070816.1 protein NRT1/ PTR FAMILY 3.1 [Sesamum indicum]
Unigene0029401	21.73	19.42	35.2	5.74	4.34	5.32	2.3097	7.85997e-20	MYB94	AKV71947.1 R2R3-MYB protein [Rehmannia glutinosa]
Unigene0032384	23.02	28.1	19.3	6.17	7.49	8.66	1.65765	8.96849e-20	PICBP	XP_011091813.1 uncharacterized protein LOC105172158 [Sesamum indicum]
Unigene0035198	16.77	44.98	15.76	0.11	0.42	0.36	6.44443	1.03988e-19	--	-
Unigene0025865	6.6	5.77	4.46	0.45	0.53	0.17	3.87133	1.06398e-19	--	-
Unigene0036200	13.95	10.54	10.27	0.08	0.52	0.09	5.65469	1.38474e-19	ATL21B	XP_012843960.1 PREDICTED: putative RING-H2 finger protein ATL21A [Erythranthe guttata]
Unigene0022321	17.73	14.87	22.04	4.61	3.93	2.77	2.27236	2.23307e-19	ASAT1	PIN07314.1 Long-chain-alcohol O-fatty-acyltransferase [Handroanthus impetiginosus]
Unigene0032434	73.02	57.03	75.24	26.61	28.22	21.59	1.42564	2.26101e-19	tif34	XP_011091371.1 uncharacterized protein LOC105171827 [Sesamum indicum]
Unigene0030165	14.08	13.37	19.11	4.62	5.31	3.99	1.74193	2.34804e-19	Y-2	XP_011098862.1 uncharacterized protein At3g27210-like [Sesamum indicum]
Unigene0015410	6.65	8.59	7.34	2.46	2.49	2.25	1.64898	2.35106e-19	GT-3B	XP_011082272.1 trihelix transcription factor GT-3b-like [Sesamum indicum]
Unigene0001853	3.34	5.12	3.59	0.1	0.13	0.07	5.32793	2.56229e-19	--	XP_022894698.1 uncharacterized protein LOC111409031 [Olea europaea var. sylvestris] [Olea europaea]
Unigene0025806	9.76	10.59	9.66	4.27	4.49	4.29	1.20139	3.18917e-19	RBP47C	XP_022894354.1 polyadenylate-binding protein RBP47-like [Olea europaea var. sylvestris] [Olea europaea]
Unigene0029270	60.03	54.95	63.77	31.99	28.88	25.7	1.046	3.24522e-19	CTR1	PIN10259.1 Tyrosine kinase [Handroanthus impetiginosus]
Unigene0000754	19.8	20.87	20.68	10.84	8.26	8.73	1.14042	3.45747e-19	--	XP_011087351.1 uncharacterized protein LOC105168867 [Sesamum indicum]
Unigene0012121	31.52	28.72	27.79	8.99	11.95	10.77	1.47306	4.13917e-19	TSPO	EYU46687.1 hypothetical protein MIMGU_mgv1a021287mg [Erythranthe guttata]
Unigene0035906	162.85	129.42	177.22	68.71	65.25	70.45	1.19963	4.17263e-19	PMA3	XP_011087207.1 plasma membrane ATPase 3 [Sesamum indicum]
Unigene0004877	26.48	33.62	41.18	11.71	13.53	12.81	1.41238	4.4203e-19	LRK10L-1.3	PIN03329.1 Serine/threonine protein kinase [Handroanthus impetiginosus]
Unigene0032183	1.66	2.1	2.13	0.11	0.1	0.16	3.99267	4.48584e-19	--	XP_011096807.1 uncharacterized protein LOC105175876 isoform X1 [Sesamum indicum]
Unigene0023702	6.14	12.32	11.16	1.35	1.14	2.11	2.68687	4.92964e-19	--	XP_012846969.1 PREDICTED: uncharacterized protein LOC105966941 [Erythranthe guttata]
Unigene0021595	13.81	16.11	18.16	6.14	5.22	5.72	1.49313	5.56901e-19	--	XP_011083423.1 uncharacterized protein LOC105165961 [Sesamum indicum]
Unigene0031725	25.24	35.34	30.02	14.05	14.39	12.36	1.15094	5.58272e-19	CAMRLK	XP_012849094.1 PREDICTED: probable LRR receptor-like serine/threonine-protein kinase At2g24230 [Erythranthe guttata]
Unigene0036158	8.08	9.31	8.7	1.79	2.16	2.98	1.91257	5.69932e-19	PDCB1	XP_011087299.1 PLASMODESMATA CALLOSE-BINDING PROTEIN 3 [Sesamum indicum]
Unigene0024103	13.97	15.29	11.4	5.8	5.48	5.51	1.27601	5.76029e-19	HDG1	XP_011093166.1 homeobox-leucine zipper protein ANTHOCYANINLESS 2 isoform X1 [Sesamum indicum]
Unigene0031646	20.28	20.03	24.59	8.95	10.46	8.95	1.19436	6.24085e-19	--	XP_011072040.1 uncharacterized protein LOC105157340 [Sesamum indicum]
Unigene0016366	17.48	23.01	21.16	9.7	9.53	8.38	1.15891	6.71611e-19	IBI1	XP_011075752.1 aspartate--tRNA ligase 2, cytoplasmic [Sesamum indicum]
Unigene0031651	257.83	185.17	173.1	0.61	2.33	0.34	7.55332	7.39345e-19	PDR1	XP_011081908.1 pleiotropic drug resistance protein 1-like isoform X2 [Sesamum indicum]
Unigene0028046	108.55	94.37	126.02	53.25	51.02	52.35	1.07056	7.63714e-19	--	XP_011100391.1 myosin-9 [Sesamum indicum]
Unigene0002536	13.19	14.86	14.81	5.82	4.83	3.69	1.57959	7.68838e-19	PLDBETA1	XP_011072042.1 phospholipase D beta 1 [Sesamum indicum]
Unigene0023978	7.35	8.4	8.15	2.01	2.91	2.61	1.66629	8.49975e-19	RLPH2	XP_011094397.1 uncharacterized protein LOC105174104 [Sesamum indicum]
Unigene0023088	8.03	7.16	6.5	0.6	0.87	0.88	3.2063	9.51853e-19	--	PIN01484.1 hypothetical protein CDL12_26008 [Handroanthus impetiginosus]
Unigene0026487	21.17	19.43	20.44	10.86	9.45	9.28	1.04465	9.67239e-19	MSI4	PIN25126.1 Nucleosome remodeling factor, subunit CAF1/NURF55/MSI1 [Handroanthus impetiginosus]
Unigene0013754	28.97	35.97	37.66	16.25	13.36	12.64	1.28001	9.95031e-19	ERF060	XP_011090520.1 ethylene-responsive transcription factor ERF060 [Sesamum indicum]
Unigene0025128	43.29	42.1	45.17	21.39	22.7	17.07	1.09405	1.25437e-18	PAA2	XP_011081596.1 copper-transporting ATPase PAA2, chloroplastic [Sesamum indicum]
Unigene0006273	6.53	8.45	5.76	0.76	1.12	0.96	2.86845	1.28666e-18	EDR2	PIN26427.1 hypothetical protein CDL12_00808 [Handroanthus impetiginosus]
Unigene0030378	60.92	95.35	164.73	11.71	14.97	6.01	3.29565	1.54616e-18	--	PIM98316.1 hypothetical protein CDL12_29208 [Handroanthus impetiginosus]
Unigene0026689	19.53	26.28	21.08	10.79	9.84	10.34	1.11092	1.97617e-18	--	TEY71949.1 hypothetical protein Saspl_001394 [Salvia splendens]
Unigene0028409	46.24	67.44	25.75	1.39	1.75	5.09	4.0825	2.08466e-18	HIPP39	XP_012840164.1 PREDICTED: FK506-binding protein 4-like [Erythranthe guttata]
Unigene0018800	21.01	16.88	26.92	6.62	5.29	7.06	1.7725	2.1117e-18	At1g33170	XP_009596891.1 PREDICTED: probable methyltransferase PMT18 [Nicotiana tomentosiformis]
Unigene0029475	35.69	45.45	32.18	14.6	16.8	16.23	1.25046	2.20088e-18	--	TEY49708.1 hypothetical protein Saspl_028795 [Salvia splendens]
Unigene0024679	21.89	29.18	9.72	1.37	0.89	1.97	3.8451	2.32175e-18	AUX22D	XP_011073484.1 auxin-induced protein 22B [Sesamum indicum]
Unigene0010368	12.36	10.8	9.16	3.4	3.89	3.51	1.5814	2.57386e-18	CHUP1	XP_022885085.1 protein CHUP1, chloroplastic isoform X2 [Olea europaea var. sylvestris] [Olea europaea]
Unigene0036049	52.17	53.58	85.01	19.24	15.46	19.98	1.80267	3.01409e-18	--	PIN04001.1 hypothetical protein CDL12_23468 [Handroanthus impetiginosus]
Unigene0004765	21.62	9.94	13.84	0.94	2.14	1.18	3.41377	3.05662e-18	--	PIN04097.1 putative hydrolase/acyltransferase (alpha/beta hydrolase superfamily) [Handroanthus impetiginosus]
Unigene0000064	12.89	17.57	14.72	3.84	4.74	6.08	1.6238	3.11023e-18	--	XP_011098836.1 uncharacterized protein LOC105177396 [Sesamum indicum]
Unigene0029301	17.19	24.9	28.89	6.22	7.05	7.28	1.78827	3.13804e-18	PPCK2	XP_012858799.1 PREDICTED: phosphoenolpyruvate carboxylase kinase 1-like [Erythranthe guttata]
Unigene0014965	436.01	572.26	417.63	220.92	209.28	245.12	1.07823	3.27506e-18	--	PIN01354.1 hypothetical protein CDL12_26136 [Handroanthus impetiginosus]
Unigene0025203	18.85	12.08	9.52	2.51	2.72	1.97	2.49007	3.33096e-18	RFS2	XP_020549611.1 probable galactinol--sucrose galactosyltransferase 2 isoform X1 [Sesamum indicum]
Unigene0025704	170.17	242.22	162.23	69.9	68.31	83.17	1.37608	3.55732e-18	PIP2-4	XP_019184775.1 PREDICTED: aquaporin PIP2-4-like [Ipomoea nil]
Unigene0036381	22.33	26.92	28.2	11.88	9.85	11.91	1.20309	3.76007e-18	WRKY11	XP_011082056.1 probable WRKY transcription factor 17 [Sesamum indicum]
Unigene0034079	8.91	7.36	12.66	0.07	0.57	0.32	4.91339	4.14294e-18	--	XP_002313920.1 uncharacterized protein LOC7478753 [Populus trichocarpa]
Unigene0020430	19.36	11.84	14.31	0.11	0.98	0.72	4.65212	4.57871e-18	--	XP_023728647.1 uncharacterized protein LOC111876340 [Lactuca sativa]
Unigene0031210	2.54	2.22	2.74	0.54	0.43	0.34	2.51732	4.96773e-18	TERT	XP_011087624.1 telomerase reverse transcriptase isoform X3 [Sesamum indicum]
Unigene0027028	13.9	9.61	9.61	1.98	1.48	0.99	2.89583	5.13729e-18	--	XP_022874303.1 S-norcoclaurine synthase 2-like [Olea europaea var. sylvestris] [Olea europaea]
Unigene0007142	55.77	51.01	69.08	25.64	24.03	28.38	1.17196	5.23517e-18	SRF6	GER53645.1 protein STRUBBELIG-RECEPTOR FAMILY [Striga asiatica]
Unigene0028602	14.09	15.01	17.36	6.73	6	7.21	1.22032	5.58042e-18	AIRP2	KAF3644652.1 putative tetraspanin-19-like [Capsicum annuum]
Unigene0029610	18.22	21.06	18.42	6.19	6.89	9.01	1.38518	5.80712e-18	--	XP_020551042.1 uncharacterized protein LOC105160920 [Sesamum indicum]
Unigene0022098	3.47	5.85	5.15	1.03	0.9	0.82	2.39556	5.87974e-18	LECRKS5	PIN12566.1 Serine/threonine protein kinase [Handroanthus impetiginosus]
Unigene0005083	16.77	20.63	17.64	6.01	7.76	7.42	1.3771	6.0811e-18	FBA6	XP_011094409.1 fructose-bisphosphate aldolase 6, cytosolic [Sesamum indicum]
Unigene0026024	39.65	41.13	34.35	17.18	16.86	18.5	1.13178	6.14177e-18	GSDA	XP_022876570.1 uncharacterized protein LOC111394803 [Olea europaea var. sylvestris] [Olea europaea]
Unigene0028882	143.1	175.98	129.38	59.43	62.33	76.88	1.17482	6.9315e-18	HIPP01	GER54294.1 heavy metal transport/detoxification superfamily protein [Striga asiatica]
Unigene0015613	14.35	19.16	19.32	7.47	5.95	7.3	1.35033	6.98935e-18	ROPGEF14	XP_011082167.1 rop guanine nucleotide exchange factor 14 [Sesamum indicum]
Unigene0028979	9.99	9.64	11.41	3.82	2.93	3	1.67065	7.30394e-18	AAP7	XP_011097704.1 probable amino acid permease 7 isoform X1 [Sesamum indicum]
Unigene0014445	31.77	35.53	54.25	11.74	11.8	13.81	1.70237	7.33092e-18	PII-2	XP_020547146.1 piriformospora indica-insensitive protein 2-like [Sesamum indicum]
Unigene0023269	13.4	11.88	10.69	4.79	5.18	4.65	1.29885	7.83401e-18	At4g27290	PIN16323.1 Serine/threonine protein kinase [Handroanthus impetiginosus]
Unigene0030625	44.8	45.45	46.87	21.64	19.06	25.54	1.04966	8.5001e-18	NFYB1	AGG09672.1 transcription factor NFYB [Salvia miltiorrhiza]
Unigene0026010	37.99	42.51	47.72	20.1	23.15	19.69	1.02657	8.61853e-18	LWD1	XP_007161787.1 hypothetical protein PHAVU_001G098000g [Phaseolus vulgaris]
Unigene0000616	39.1	37.81	31.65	18.19	17.99	17.01	1.02927	8.69989e-18	AAE17	XP_022885617.1 probable acyl-activating enzyme 17, peroxisomal [Olea europaea var. sylvestris] [Olea europaea]
Unigene0001975	21.65	17.35	44.49	3.05	4.46	2.76	3.02317	8.88143e-18	CYP81Q32	XP_022843744.1 cytochrome P450 81E8-like [Olea europaea var. sylvestris] [Olea europaea]
Unigene0006461	28.24	20.38	26.99	9.67	10.31	8.54	1.4066	1.00221e-17	FAR2	XP_011078802.1 fatty acyl-CoA reductase 2 [Sesamum indicum]
Unigene0022874	20.25	41.32	37.17	6.84	8.56	5.75	2.22298	1.04425e-17	CYP71B34	PIN13702.1 Cytochrome P450 CYP2 subfamily [Handroanthus impetiginosus]
Unigene0006335	8.52	12.18	14.77	1.99	3.11	2.15	2.29055	1.06906e-17	GGCT2;2	XP_011082091.1 gamma-glutamylcyclotransferase 2-1-like [Sesamum indicum]
Unigene0030037	15.32	18.26	14.48	6.57	7.3	7.67	1.15782	1.10647e-17	HSK	XP_022852570.1 homoserine kinase [Olea europaea var. sylvestris] [Olea europaea]
Unigene0019396	9.98	11.91	20.75	2.13	2.51	1.43	2.81244	1.17961e-17	5MAT1	XP_012852493.1 PREDICTED: malonyl-coenzyme:anthocyanin 5-O-glucoside-6'''-O-malonyltransferase-like [Erythranthe guttata]
Unigene0010712	39.72	46.28	43.03	21.36	18.3	16.35	1.20395	1.28577e-17	--	RAL44006.1 hypothetical protein DM860_014143 [Cuscuta australis]
Unigene0036104	8.16	10.59	11.83	3.97	3.47	3.79	1.44523	1.328e-17	--	XP_011090943.1 uncharacterized protein LOC105171501 [Sesamum indicum]
Unigene0030084	2.06	3.19	3.94	0.07	0.03	0.05	5.93703	1.41197e-17	POT6	XP_011086541.1 potassium transporter 6 isoform X1 [Sesamum indicum]
[truncated: 1,278 more rows]

## Sheet: Down
Significantly down-regulated DEGs identified as those with LogFC <-1
[truncated: 3,982 more rows]
