# Supplementary material for: A mechanical force sensor controls touch-triggered floral organ movement through manipulation of calcium signature in Torenia fournieri
Source: Research Square preprint supplement (doi:10.21203/rs.3.rs-4915676/v1), 2024-09-27
Supplement: Supplementary file 2 [file 773efcd1bdb3b7617b509f87.xlsx]

## Sheet: Sheet1
Tab. S4 Primers used in this study
Primer names, sequences and purposes were listed below
Primer names	Sequences (5'-3')	Purposes
JUE1-is-F1	AACGAGTTGGAGGCAAGGAG	RNA in-situ hybridization and RT-PCR
JUE1-is-R1	TCACGAACACGAAGACTATGGA	RNA in-situ hybridization and RT-PCR
JUE2-is-F1	GAGATGAACATACTGGCGACTG	RNA in-situ hybridization and RT-PCR
JUE2-is-R1	TTCTTGAGGAAGCAGACGATATTC	RNA in-situ hybridization and RT-PCR
TfACT3-RT-F1	AGTCAGCCACACAGTCCCAAT	RT-PCR
TfACT3-RT-R1	CGAGCCACCACTGAGAACAATG	RT-PCR
JUE1-3d-F1	GTCACGCAACAACAAACTACCAA	CRISPR plasmid construction
JUE1-3d-R1	AAACTTGGTAGTTTGTTGTTGCG	CRISPR plasmid construction
JUE1-3b-F2	GTCATGCGAGTGCTCGACGGATC	CRISPR plasmid construction
JUE1-3b-R2	AAACGATCCGTCGAGCACTCGCA	CRISPR plasmid construction
JUE1-61-F3	ATTGAAGAAGGACTCGACGGAGA	CRISPR plasmid construction
JUE1-61-R3	AAACTCTCCGTCGAGTCCTTCTT	CRISPR plasmid construction
JUE1-629-F4	ATTGAAAAATGCGGGCTCCACTTG	CRISPR plasmid construction
JUE1-629-R4	AAACCAAGTGGAGCCCGCATTTTT	CRISPR plasmid construction
JUE2-3d-F1	GTCATGCCTAGGATGCGACGAGGA	CRISPR plasmid construction
JUE2-3d-R1	AAACTCCTCGTCGCATCCTAGGCA	CRISPR plasmid construction
JUE2-3b-F2	GTCACGCCGTTATGAGAGCCGCC	CRISPR plasmid construction
JUE2-3b-R2	AAACGGCGGCTCTCATAACGGCG	CRISPR plasmid construction
JUE2-61-F3	ATTGCGATGTCCTGACGCCTCGCG	CRISPR plasmid construction
JUE2-61-R3	AAACCGCGAGGCGTCAGGACATCG	CRISPR plasmid construction
JUE2-629-F4	ATTGCGCCTGCGTTTTGTAGCTTT	CRISPR plasmid construction
JUE2-629-R4	AAACAAAGCTACAAAACGCAGGCG	CRISPR plasmid construction
JUE1-cDNA-F1	CGGGGGACTCTTGACATGCACACACGCAACAACAAAC	Full length cloning
JUE1-cDNA-R1	ACTAGTCAGATCTACAACCCTTGAACTGTTATTATGAAACTGCAC	Full length cloning
JUE2-cDNA-F1	TCCCCTTGCTCCGTGATGGCGTCTCCGCCGC	Full length cloning
JUE2-cDNA-R1	GCCCTTGCTCACCATGTTGGATGCACATGTTGTCCAATTAGA	Full length cloning
Cas9-F1	CTGACGCTAACCTCGACAAG	Torenia mutant genotyping
Cas9-R1	CCGATCTAGTAACATAGATGACACC	Torenia mutant genotyping
JUE1-Cas9-PCR-F1	GACACTTATTGGTCTTATCTGC	Torenia mutant genotyping
JUE1-Cas9-PCR-R1	GCTGAAGGTGACGAGGA	Torenia mutant genotyping
JUE1-Cas9-Seq-F1	ACACCAATCATACGATCTCT	Torenia mutant genotyping
JUE1-Cas9-Seq-R1	CATCAGGCACCATCTCC	Torenia mutant genotyping
JUE2-Cas9-PCR-F1	TCATCACCTTACTGTCTCAT	Torenia mutant genotyping
JUE2-Cas9-PCR-R1	TACTAAATGCTGGGCTTCTA	Torenia mutant genotyping
JUE2-Cas9-Seq-F1	GCCTGTTGATTTGATGGTAT	Torenia mutant genotyping
JUE2-Cas9-Seq-R1	GATAACTCGTCCGCTCTT	Torenia mutant genotyping
GCaMP6f-HygR-F1	TACTTCTACACAGCCATCG	Torenia mutant genotyping
GCaMP6f-HygR-R1	CAAGGAATCGGTCAATACAC	Torenia mutant genotyping
