# Supplementary material for: A mechanical force sensor controls touch-triggered floral organ movement through manipulation of calcium signature in Torenia fournieri
Source: Research Square preprint supplement (doi:10.21203/rs.3.rs-4915676/v1), 2024-09-27
Supplement: Supplementary file 3 [file 8d37be3d9a8ce7f16c25f96b.xlsx]

## Sheet: All
Tab. S2 Heatmap of candidate differentially enriched genes
Differential expression analysis of all genes conducted using the EdgeR package, stigma_1/2/3 and style_1/2/3 refer to three biological replicates of Torenia samples.
* Gene name; ** the log fold change from the FPKM value;
reference_id*	stigma_1	stigma_2	stigma_3	style_1	style_2	style_3	annotation	type
Unigene0011542	1.02724	0.938618	1.0249	-1.00095	-0.868818	-1.12099	MSL6	Channels
Unigene0027138	1.07166	1.05101	0.857972	-0.929184	-0.878811	-1.17265	MSL8
Unigene0017954	1.00899	0.944065	1.03712	-0.938557	-0.904129	-1.14749	SKOR
Unigene0025703	0.879768	0.946176	1.15584	-1.0995	-1.02601	-0.85627	PIP2-1
Unigene0035539	-0.9924	-1.35464	-0.57079	1.06159	0.975499	0.880745	TIP1-1
Unigene0025704	0.750872	1.46957	0.653601	-1.06035	-1.10719	-0.706504	PIP2-4
Unigene0028884	0.99502	0.914923	1.0836	-0.929752	-0.983847	-1.07994	CPK19	Calcium signaling
Unigene0035906	-0.796514	-0.742884	-1.38411	0.919449	0.852965	1.15109	PMA3
Unigene0027046	-0.853592	-0.794102	-1.31014	1.01809	0.912883	1.02686	CIPK6
Unigene0007875	0.180523	0.686343	1.77824	-0.891656	-0.846096	-0.907352	CML42
Unigene0030557	-0.997759	-0.916393	-1.08206	0.970032	1.00307	1.02311	YDA
Unigene0018581	0.8738	1.06885	1.04703	-0.887613	-1.06811	-1.03395	CPK13
Unigene0001988	-0.402726	1.18543	1.59548	-0.786319	-0.825048	-0.766817	CML18
Unigene0000364	1.0289	0.834633	1.12409	-1.0575	-0.975226	-0.95489	SBT4.15	Cell wall related
Unigene0000037	1.09918	0.886338	1.00619	-1.07747	-0.976047	-0.93819	GASA10
Unigene0031805	1.02023	0.892445	1.07574	-1.06293	-0.858133	-1.06735	C/VIF2
Unigene0007183	1.35414	0.754129	0.774403	-1.02598	-1.26121	-0.595488	EXPA1
Unigene0007182	1.22707	1.04836	0.639711	-0.931409	-1.26654	-0.717194	EXPA11
Unigene0014179	0.924959	0.887899	1.15723	-0.975433	-0.802273	-1.19239	SBT1.5
Unigene0015062	0.995798	1.00863	0.977274	-1.13643	-0.777699	-1.06757	EXPA7
Unigene0036359	-0.796514	-0.742884	-1.38411	0.919449	0.852965	1.15109	EXPA4
Unigene0009477	-0.779933	-0.475729	-1.57276	0.815115	1.02529	0.988012	WAKL20
Unigene0035137	0.914917	1.19863	0.800703	-1.06711	-1.27028	-0.576864	EXPB3
Unigene0011626	-0.476004	-0.82009	-1.5266	0.932481	0.705969	1.18425	EXPA8
Unigene0018070	1.03993	0.971818	0.955075	-0.723153	-1.22668	-1.01699	LNG1
Unigene0028869	1.03982	0.990756	0.948598	-1.14805	-1.06188	-0.76924	XLT2
Unigene0033408	-0.912457	-0.681225	-1.33103	0.904593	0.819041	1.20108	IAA9	Phytohormone related
Unigene0031814	1.01402	1.1769	0.701665	-1.40362	-0.655925	-0.833037	D14
Unigene0024096	1.00661	1.18531	0.785118	-0.929686	-0.97241	-1.07493	HAB1
Unigene0016447	1.09254	0.822278	1.07299	-1.0212	-0.949345	-1.01726	ARF16
Unigene0024066	0.601794	0.855332	1.4415	-0.838755	-1.07033	-0.989546	NCED1
Unigene0006639	1.02668	0.982166	0.970558	-0.898405	-0.857605	-1.22339	ARF6
Unigene0031034	1.00367	1.13224	0.854185	-1.02021	-0.986564	-0.983315	HEC3
Unigene0033963	0.965958	1.12004	0.905848	-0.943839	-1.06797	-0.980043	AHK4
Unigene0018985	0.962016	1.1301	0.887479	-1.10784	-1.05983	-0.81193	ZOX1
Unigene0017374	1.15078	1.00289	0.818849	-1.01272	-0.81653	-1.14327	PP2C53
Unigene0011685	-0.883478	-0.637773	-1.37359	0.886684	0.755669	1.25249	RAP2-2
Unigene0024423	1.08681	1.13568	0.724048	-0.878242	-0.816663	-1.25163	ARF18
Unigene0005428	0.462186	1.58175	0.785132	-0.941286	-0.935553	-0.952229	RAP2-13
Unigene0007528	0.987022	1.0947	0.90592	-1.06287	-1.07345	-0.851318	ERF008
Unigene0012199	1.21926	1.38138	0.0134668	-1.33819	-0.626026	-0.649887	PP2C6
Unigene0026788	1.00727	1.04064	0.827012	-1.33748	-0.416716	-1.12072	YUC3
Unigene0002495	-0.908902	-0.763782	-1.28316	0.876736	0.955753	1.12335	DAD2
Unigene0029381	0.997729	1.20767	0.763138	-1.08802	-1.01691	-0.863604	PP2B10
Unigene0026121	1.09055	0.663541	1.18323	-0.811029	-0.901801	-1.22449	ABCG15	Transporters
Unigene0007936	1.13319	0.910661	0.946415	-0.926539	-0.993785	-1.06995	ABCG11
Unigene0024541	-0.792955	-1.0006	-1.18612	1.03815	0.952782	0.988743	SUC2
Unigene0000445	1.31243	0.823879	0.81516	-0.894008	-0.932769	-1.1247	ABCG11
Unigene0032924	0.924717	1.07958	0.957685	-0.788388	-0.888762	-1.28483	BOR1
Unigene0030959	1.05344	0.812719	1.08618	-0.877509	-0.784969	-1.28987	OPT4
Unigene0027403	1.09814	1.11238	0.768399	-0.922683	-1.04933	-1.00689	ABCC4
Unigene0031651	1.06439	0.947676	0.923911	-1.06746	-0.594962	-1.27355	PDR1
Unigene0011272	1.01451	1.09917	0.876068	-1.09156	-0.981128	-0.917062	SWEET16
Unigene0011619	1.01022	1.16399	0.804485	-1.10765	-0.928697	-0.942352	PLT5
Unigene0009069	1.10481	0.974772	0.907722	-1.13592	-0.949445	-0.901938	AVP1
Unigene0024672	1.03922	0.822497	1.11299	-0.827391	-0.987929	-1.15939	UDP-GALT1
Unigene0033244	0.870816	1.38437	0.666338	-1.12524	-0.927206	-0.869081	URGT6
Unigene0033335	1.10867	0.960104	0.922188	-1.04735	-0.89159	-1.05202	NPF8.1
Unigene0029361	-0.816268	-1.18836	-0.967254	1.15242	0.873314	0.946144	VHA-a3
Unigene0021369	0.927923	0.992011	1.07416	-0.981209	-1.08525	-0.927641	NAT6
Unigene0024032	1.25952	1.12747	0.505454	-1.1529	-1.01933	-0.72021	NPF3.1
Unigene0036613	1.03997	0.79334	1.11773	-1.14271	-0.68174	-1.12659	SWEET1
Unigene0029233	0.927184	0.795424	1.23437	-0.845822	-1.19713	-0.914022	OPT5
