# Supplementary material for: A mechanical force sensor controls touch-triggered floral organ movement through manipulation of calcium signature in Torenia fournieri
Source: Research Square preprint supplement (doi:10.21203/rs.3.rs-4915676/v1), 2024-09-27
Supplement: Supplementary file 4 [file ebd3ff046c33053d7404f368.xlsx]

## Sheet: Tab. S3 Gene Ontology (GO) term
Tab. S3 Gene Ontology (GO) terms significantly changed in stigma compared with style
GO ID	Description	adj_pvalue	Genes
Cellular Component
GO:0031224	intrinsic component of membrane	1.05689e-11	Unigene0000037(GASA10);Unigene0000090(TOM7-1);Unigene0000168(CNGC2);Unigene0000226(HMA4);Unigene0000231(R1A-10);Unigene0000233(NPF8.3);Unigene0000283(ABCG18);Unigene0000361(LRK10L-1.1);Unigene0000400(PHYLLO);Unigene0000445(ABCG11);Unigene0000509(At4g30420);Unigene0000533(BASS1);Unigene0000565(YMF16);Unigene0000568(--);Unigene0000577(At4g39110);Unigene0000585(At1g17230);Unigene0000633(WAK2);Unigen…
GO:0016020	membrane	1.17389e-11	Unigene0000015(TUBB1);Unigene0000022(CESA2);Unigene0000037(GASA10);Unigene0000074(PTI13);Unigene0000083(RPP13L3);Unigene0000090(TOM7-1);Unigene0000095(--);Unigene0000168(CNGC2);Unigene0000226(HMA4);Unigene0000231(R1A-10);Unigene0000233(NPF8.3);Unigene0000263(AUR3);Unigene0000283(ABCG18);Unigene0000337(DVR);Unigene0000346(NUP98A);Unigene0000361(LRK10L-1.1);Unigene0000365(FAR2);Unigene0000386(ICS2)…
GO:0071944	cell periphery	8.86403e-11	Unigene0000015(TUBB1);Unigene0000074(PTI13);Unigene0000168(CNGC2);Unigene0000219(PME40);Unigene0000233(NPF8.3);Unigene0000283(ABCG18);Unigene0000361(LRK10L-1.1);Unigene0000428(NQR);Unigene0000445(ABCG11);Unigene0000565(YMF16);Unigene0000577(At4g39110);Unigene0000585(At1g17230);Unigene0000651(ALE2);Unigene0000766(ALMT2);Unigene0000781(ABCG32);Unigene0000786(At1g07660);Unigene0000806(IPT1);Unigene0…
GO:0016021	integral component of membrane	8.86403e-11	Unigene0000037(GASA10);Unigene0000090(TOM7-1);Unigene0000168(CNGC2);Unigene0000226(HMA4);Unigene0000231(R1A-10);Unigene0000233(NPF8.3);Unigene0000283(ABCG18);Unigene0000361(LRK10L-1.1);Unigene0000400(PHYLLO);Unigene0000445(ABCG11);Unigene0000509(At4g30420);Unigene0000533(BASS1);Unigene0000565(YMF16);Unigene0000568(--);Unigene0000577(At4g39110);Unigene0000585(At1g17230);Unigene0000633(WAK2);Unigen…
GO:0005886	plasma membrane	3.82078e-09	Unigene0000015(TUBB1);Unigene0000074(PTI13);Unigene0000168(CNGC2);Unigene0000233(NPF8.3);Unigene0000283(ABCG18);Unigene0000361(LRK10L-1.1);Unigene0000428(NQR);Unigene0000445(ABCG11);Unigene0000565(YMF16);Unigene0000577(At4g39110);Unigene0000585(At1g17230);Unigene0000651(ALE2);Unigene0000766(ALMT2);Unigene0000781(ABCG32);Unigene0000786(At1g07660);Unigene0000806(IPT1);Unigene0000815(ENODL1);Unigene…
GO:0048046	apoplast	2.89156e-07	Unigene0000866(BGAL10);Unigene0000925(At3g55800);Unigene0001514(UMK3);Unigene0001644(PSBQ2);Unigene0001987(CSP41A);Unigene0002925(GDCST);Unigene0003391(DIR23);Unigene0003648(--);Unigene0003919(EXL3);Unigene0004331(ASP);Unigene0005509(FBA1);Unigene0005510(FBA2);Unigene0005837(AMY1.1);Unigene0006066(XTH30);Unigene0007397(XTH15);Unigene0007412(CPRD49);Unigene0008244(XTH31);Unigene0008297(RALFL19);Un…
GO:0009579	thylakoid	4.40335e-07	Unigene0000337(DVR);Unigene0000496(FDH1);Unigene0000726(CRD1);Unigene0000786(At1g07660);Unigene0000817(PAP8);Unigene0000925(At3g55800);Unigene0000936(TIC20-V);Unigene0000947(CHLG);Unigene0000973(CURT1B);Unigene0001497(PTAC16);Unigene0001644(PSBQ2);Unigene0001955(PPF-1);Unigene0001987(CSP41A);Unigene0002603(RPL13);Unigene0002879(BASS2);Unigene0002925(GDCST);Unigene0002953(PSB27-1);Unigene0003327(-…
GO:0044434	chloroplast part	1.06262e-06	Unigene0000337(DVR);Unigene0000400(PHYLLO);Unigene0000428(NQR);Unigene0000458(HEME1);Unigene0000533(BASS1);Unigene0000659(PPT2);Unigene0000726(CRD1);Unigene0000817(PAP8);Unigene0000925(At3g55800);Unigene0000936(TIC20-V);Unigene0000947(CHLG);Unigene0000973(CURT1B);Unigene0001406(WAV3);Unigene0001497(PTAC16);Unigene0001524(DHAD);Unigene0001644(PSBQ2);Unigene0001955(PPF-1);Unigene0001987(CSP41A);Uni…
GO:0044425	membrane part	1.95567e-06	Unigene0000037(GASA10);Unigene0000090(TOM7-1);Unigene0000168(CNGC2);Unigene0000226(HMA4);Unigene0000231(R1A-10);Unigene0000233(NPF8.3);Unigene0000263(AUR3);Unigene0000283(ABCG18);Unigene0000361(LRK10L-1.1);Unigene0000400(PHYLLO);Unigene0000445(ABCG11);Unigene0000494(--);Unigene0000509(At4g30420);Unigene0000533(BASS1);Unigene0000565(YMF16);Unigene0000568(--);Unigene0000577(At4g39110);Unigene000058…
GO:0009507	chloroplast	6.42923e-06	Unigene0000337(DVR);Unigene0000366(CHLP);Unigene0000386(ICS2);Unigene0000400(PHYLLO);Unigene0000428(NQR);Unigene0000458(HEME1);Unigene0000496(FDH1);Unigene0000533(BASS1);Unigene0000569(IPT5);Unigene0000659(PPT2);Unigene0000726(CRD1);Unigene0000786(At1g07660);Unigene0000817(PAP8);Unigene0000925(At3g55800);Unigene0000936(TIC20-V);Unigene0000947(CHLG);Unigene0000973(CURT1B);Unigene0001086(--);Unigen…
GO:0044436	thylakoid part	7.76344e-06	Unigene0000726(CRD1);Unigene0000936(TIC20-V);Unigene0000973(CURT1B);Unigene0001497(PTAC16);Unigene0001644(PSBQ2);Unigene0001955(PPF-1);Unigene0002953(PSB27-1);Unigene0003327(--);Unigene0003458(rplR);Unigene0004018(CSA);Unigene0004242(PPD2);Unigene0004387(FKBP19);Unigene0005488(SECE1);Unigene0006713(PSAH);Unigene0006714(PSAH);Unigene0007167(ASA1);Unigene0008362(PSB28);Unigene0008520(PSAF);Unigene0…
GO:0034357	photosynthetic membrane	8.4359e-06	Unigene0000726(CRD1);Unigene0000936(TIC20-V);Unigene0000973(CURT1B);Unigene0001497(PTAC16);Unigene0001644(PSBQ2);Unigene0001955(PPF-1);Unigene0002953(PSB27-1);Unigene0003327(--);Unigene0003458(rplR);Unigene0004018(CSA);Unigene0004242(PPD2);Unigene0004387(FKBP19);Unigene0005488(SECE1);Unigene0006713(PSAH);Unigene0006714(PSAH);Unigene0007167(ASA1);Unigene0008362(PSB28);Unigene0008520(PSAF);Unigene0…
GO:0031226	intrinsic component of plasma membrane	8.56749e-06	Unigene0000168(CNGC2);Unigene0000283(ABCG18);Unigene0000445(ABCG11);Unigene0000565(YMF16);Unigene0000781(ABCG32);Unigene0000806(IPT1);Unigene0000815(ENODL1);Unigene0000849(ABCB4);Unigene0001160(STP14);Unigene0001190(--);Unigene0001435(IREG2);Unigene0001541(SUC1);Unigene0002197(At4g34480);Unigene0002869(CNGC18);Unigene0003258(RPL9);Unigene0003478(SKU5);Unigene0003487(MST7);Unigene0003488(STC);Unig…
GO:0005618	cell wall	1.07949e-05	Unigene0000219(PME40);Unigene0000866(BGAL10);Unigene0001250(IMK2);Unigene0001251(IMK2);Unigene0002197(At4g34480);Unigene0002702(LRX2);Unigene0003087(PAE9);Unigene0003919(EXL3);Unigene0003934(TUFA);Unigene0004138(PER17);Unigene0004331(ASP);Unigene0005615(CHER1);Unigene0005689(SCPL45);Unigene0005691(EXPA9);Unigene0006066(XTH30);Unigene0006182(TPPI);Unigene0006658(TMN2);Unigene0006866(At1g32860);Uni…
GO:0009534	chloroplast thylakoid	1.08681e-05	Unigene0000337(DVR);Unigene0000726(CRD1);Unigene0000817(PAP8);Unigene0000936(TIC20-V);Unigene0000947(CHLG);Unigene0000973(CURT1B);Unigene0001497(PTAC16);Unigene0001644(PSBQ2);Unigene0001955(PPF-1);Unigene0001987(CSP41A);Unigene0002879(BASS2);Unigene0002925(GDCST);Unigene0004018(CSA);Unigene0004242(PPD2);Unigene0004387(FKBP19);Unigene0005488(SECE1);Unigene0008362(PSB28);Unigene0008520(PSAF);Unigen…
GO:0031976	plastid thylakoid	1.08681e-05	Unigene0000337(DVR);Unigene0000726(CRD1);Unigene0000817(PAP8);Unigene0000936(TIC20-V);Unigene0000947(CHLG);Unigene0000973(CURT1B);Unigene0001497(PTAC16);Unigene0001644(PSBQ2);Unigene0001955(PPF-1);Unigene0001987(CSP41A);Unigene0002879(BASS2);Unigene0002925(GDCST);Unigene0004018(CSA);Unigene0004242(PPD2);Unigene0004387(FKBP19);Unigene0005488(SECE1);Unigene0008362(PSB28);Unigene0008520(PSAF);Unigen…
GO:0044435	plastid part	1.08681e-05	Unigene0000337(DVR);Unigene0000400(PHYLLO);Unigene0000428(NQR);Unigene0000458(HEME1);Unigene0000533(BASS1);Unigene0000659(PPT2);Unigene0000726(CRD1);Unigene0000817(PAP8);Unigene0000925(At3g55800);Unigene0000936(TIC20-V);Unigene0000947(CHLG);Unigene0000973(CURT1B);Unigene0001406(WAV3);Unigene0001497(PTAC16);Unigene0001524(DHAD);Unigene0001644(PSBQ2);Unigene0001955(PPF-1);Unigene0001987(CSP41A);Uni…
GO:0009526	plastid envelope	1.08681e-05	Unigene0000337(DVR);Unigene0000400(PHYLLO);Unigene0000533(BASS1);Unigene0000659(PPT2);Unigene0000726(CRD1);Unigene0000817(PAP8);Unigene0000925(At3g55800);Unigene0000936(TIC20-V);Unigene0000947(CHLG);Unigene0000973(CURT1B);Unigene0001497(PTAC16);Unigene0001987(CSP41A);Unigene0002603(RPL13);Unigene0002615(RPL18);Unigene0002879(BASS2);Unigene0002925(GDCST);Unigene0003258(RPL9);Unigene0004018(CSA);Un…
GO:0009536	plastid	2.91376e-05	Unigene0000337(DVR);Unigene0000366(CHLP);Unigene0000386(ICS2);Unigene0000400(PHYLLO);Unigene0000428(NQR);Unigene0000458(HEME1);Unigene0000496(FDH1);Unigene0000533(BASS1);Unigene0000569(IPT5);Unigene0000659(PPT2);Unigene0000726(CRD1);Unigene0000786(At1g07660);Unigene0000817(PAP8);Unigene0000925(At3g55800);Unigene0000936(TIC20-V);Unigene0000947(CHLG);Unigene0000973(CURT1B);Unigene0001086(--);Unigen…
GO:0009941	chloroplast envelope	3.7887e-05	Unigene0000337(DVR);Unigene0000400(PHYLLO);Unigene0000533(BASS1);Unigene0000659(PPT2);Unigene0000726(CRD1);Unigene0000817(PAP8);Unigene0000925(At3g55800);Unigene0000936(TIC20-V);Unigene0000947(CHLG);Unigene0000973(CURT1B);Unigene0001497(PTAC16);Unigene0001987(CSP41A);Unigene0002603(RPL13);Unigene0002615(RPL18);Unigene0002879(BASS2);Unigene0002925(GDCST);Unigene0003258(RPL9);Unigene0004018(CSA);Un…
GO:0009341	beta-galactosidase complex	8.85938e-05	Unigene0000867(BGAL8);Unigene0004377(MAN2);Unigene0004903(BGAL3);Unigene0014189(lacZ);Unigene0019007(HEN1);Unigene0019584(BGAL3);Unigene0022336(BGLU44);Unigene0024470(BGAL1);Unigene0024741(BGAL8);Unigene0025136(exgA);Unigene0025515(BGLU40);Unigene0026818(BGAL1);Unigene0026820(BGAL1);Unigene0027323(BGAL3);Unigene0034180(BGLU16);Unigene0034676(BGLU11);Unigene0036383(RG)
GO:0005887	integral component of plasma membrane	0.000119958	Unigene0000168(CNGC2);Unigene0000283(ABCG18);Unigene0000445(ABCG11);Unigene0000565(YMF16);Unigene0000781(ABCG32);Unigene0000806(IPT1);Unigene0000849(ABCB4);Unigene0001160(STP14);Unigene0001190(--);Unigene0001435(IREG2);Unigene0001541(SUC1);Unigene0002869(CNGC18);Unigene0003258(RPL9);Unigene0003487(MST7);Unigene0003488(STC);Unigene0003523(At4g22990);Unigene0003574(TIP1-1);Unigene0003967(CLPX1);Uni…
GO:0009535	chloroplast thylakoid membrane	0.000155439	Unigene0000726(CRD1);Unigene0000936(TIC20-V);Unigene0000973(CURT1B);Unigene0001497(PTAC16);Unigene0001644(PSBQ2);Unigene0001955(PPF-1);Unigene0004018(CSA);Unigene0004387(FKBP19);Unigene0005488(SECE1);Unigene0008362(PSB28);Unigene0008520(PSAF);Unigene0008669(LPA1);Unigene0009623(ATPC);Unigene0010420(PSBY);Unigene0011131(FKBP16-4);Unigene0011179(LHCB4.1);Unigene0012670(PYG7);Unigene0015770(CLEB3J9)…
GO:0055035	plastid thylakoid membrane	0.000155439	Unigene0000726(CRD1);Unigene0000936(TIC20-V);Unigene0000973(CURT1B);Unigene0001497(PTAC16);Unigene0001644(PSBQ2);Unigene0001955(PPF-1);Unigene0004018(CSA);Unigene0004387(FKBP19);Unigene0005488(SECE1);Unigene0008362(PSB28);Unigene0008520(PSAF);Unigene0008669(LPA1);Unigene0009623(ATPC);Unigene0010420(PSBY);Unigene0011131(FKBP16-4);Unigene0011179(LHCB4.1);Unigene0012670(PYG7);Unigene0015770(CLEB3J9)…
GO:0009521	photosystem	0.000155439	Unigene0000973(CURT1B);Unigene0001644(PSBQ2);Unigene0002953(PSB27-1);Unigene0003327(--);Unigene0003458(rplR);Unigene0004242(PPD2);Unigene0006713(PSAH);Unigene0006714(PSAH);Unigene0007167(ASA1);Unigene0008362(PSB28);Unigene0008520(PSAF);Unigene0010420(PSBY);Unigene0011179(LHCB4.1);Unigene0016692(psaD);Unigene0016693(psaD);Unigene0017128(PAM68);Unigene0019269(PSKR);Unigene0021460(PSAK);Unigene00214…
GO:0005576	extracellular region	0.000216321	Unigene0000219(PME40);Unigene0000317(ARG7);Unigene0000364(SBT4.15);Unigene0000496(FDH1);Unigene0000866(BGAL10);Unigene0000925(At3g55800);Unigene0001093(SCPL50);Unigene0001308(GLIP7);Unigene0001514(UMK3);Unigene0001644(PSBQ2);Unigene0001979(At1g48930);Unigene0001987(CSP41A);Unigene0002000(--);Unigene0002197(At4g34480);Unigene0002702(LRX2);Unigene0002723(At4g00165);Unigene0002925(GDCST);Unigene0003…
GO:0042651	thylakoid membrane	0.000221142	Unigene0000726(CRD1);Unigene0000936(TIC20-V);Unigene0000973(CURT1B);Unigene0001497(PTAC16);Unigene0001644(PSBQ2);Unigene0001955(PPF-1);Unigene0004018(CSA);Unigene0004242(PPD2);Unigene0004387(FKBP19);Unigene0005488(SECE1);Unigene0008362(PSB28);Unigene0008520(PSAF);Unigene0008669(LPA1);Unigene0009623(ATPC);Unigene0010420(PSBY);Unigene0011131(FKBP16-4);Unigene0011179(LHCB4.1);Unigene0012670(PYG7);Un…
GO:0009505	plant-type cell wall	0.00037432	Unigene0000866(BGAL10);Unigene0001250(IMK2);Unigene0001251(IMK2);Unigene0003087(PAE9);Unigene0003919(EXL3);Unigene0004138(PER17);Unigene0005615(CHER1);Unigene0005689(SCPL45);Unigene0006658(TMN2);Unigene0006866(At1g32860);Unigene0009262(EXPA4);Unigene0010646(PER12);Unigene0014502(NAC007);Unigene0017209(PER46);Unigene0017840(XTH5);Unigene0018724(GASA1);Unigene0019584(BGAL3);Unigene0022336(BGLU44);U…
GO:0030312	external encapsulating structure	0.00636874	Unigene0000219(PME40);Unigene0000866(BGAL10);Unigene0000944(--);Unigene0001250(IMK2);Unigene0001251(IMK2);Unigene0002197(At4g34480);Unigene0002218(BHLH147);Unigene0002702(LRX2);Unigene0003087(PAE9);Unigene0003560(EMB1417);Unigene0003919(EXL3);Unigene0003934(TUFA);Unigene0004138(PER17);Unigene0004331(ASP);Unigene0005615(CHER1);Unigene0005689(SCPL45);Unigene0005691(EXPA9);Unigene0006066(XTH30);Unig…
GO:0046658	anchored component of plasma membrane	0.00743472	Unigene0000815(ENODL1);Unigene0002197(At4g34480);Unigene0003478(SKU5);Unigene0003648(--);Unigene0006866(At1g32860);Unigene0010587(LYM1);Unigene0012856(--);Unigene0013207(At5g56590);Unigene0013277(At5g58090);Unigene0014034(PIP2-7);Unigene0015920(At5g10080);Unigene0020143(At2g25060);Unigene0021577(--);Unigene0022972(ARPN);Unigene0023114(At1g11820);Unigene0024614(URED);Unigene0024910(TRE1);Unigene00…
GO:0009522	photosystem I	0.0108769	Unigene0000973(CURT1B);Unigene0002953(PSB27-1);Unigene0003327(--);Unigene0003458(rplR);Unigene0006713(PSAH);Unigene0006714(PSAH);Unigene0008362(PSB28);Unigene0008520(PSAF);Unigene0011179(LHCB4.1);Unigene0016692(psaD);Unigene0016693(psaD);Unigene0021460(PSAK);Unigene0021461(PSAK);Unigene0023022(LHCA5);Unigene0023108(LHCA1);Unigene0023445(PSAN);Unigene0028076(CAB13);Unigene0029259(PSAG);Unigene0029…
GO:0031225	anchored component of membrane	0.0113201	Unigene0000815(ENODL1);Unigene0001870(At4g17280);Unigene0002197(At4g34480);Unigene0003478(SKU5);Unigene0003648(--);Unigene0006866(At1g32860);Unigene0010587(LYM1);Unigene0012856(--);Unigene0013207(At5g56590);Unigene0013277(At5g58090);Unigene0014034(PIP2-7);Unigene0014381(1MMP);Unigene0015920(At5g10080);Unigene0020143(At2g25060);Unigene0021577(--);Unigene0022972(ARPN);Unigene0023114(At1g11820);Unig…
GO:0031977	thylakoid lumen	0.0186405	Unigene0001644(PSBQ2);Unigene0004242(PPD2);Unigene0004387(FKBP19);Unigene0008520(PSAF);Unigene0011018(At1g67280);Unigene0011131(FKBP16-4);Unigene0015770(CLEB3J9);Unigene0017460(PNSL5);Unigene0021535(FKBP13);Unigene0021750(CTPA2);Unigene0024720(PAP6);Unigene0028186(TL17);Unigene0029765(PRXQ);Unigene0030012(CYP37);Unigene0031643(TL20.3);Unigene0033207(PETH);Unigene0033208(PETH);Unigene0034287(HCF13…
GO:0009570	chloroplast stroma	0.0186405	Unigene0000428(NQR);Unigene0000458(HEME1);Unigene0000925(At3g55800);Unigene0001497(PTAC16);Unigene0001524(DHAD);Unigene0001644(PSBQ2);Unigene0001987(CSP41A);Unigene0002261(PHS1);Unigene0002603(RPL13);Unigene0002615(RPL18);Unigene0002925(GDCST);Unigene0002950(FLN1);Unigene0003258(RPL9);Unigene0003332(ATP1);Unigene0003428(ACPD);Unigene0003647(KAS3B);Unigene0003705(CARB);Unigene0003706(CARB);Unigene…
GO:0009523	photosystem II	0.022517	Unigene0001644(PSBQ2);Unigene0002953(PSB27-1);Unigene0004242(PPD2);Unigene0007167(ASA1);Unigene0008362(PSB28);Unigene0010420(PSBY);Unigene0011179(LHCB4.1);Unigene0017128(PAM68);Unigene0019269(PSKR);Unigene0023022(LHCA5);Unigene0023108(LHCA1);Unigene0025973(PPD7);Unigene0026592(PSBP);Unigene0028076(CAB13);Unigene0028337(PSBO);Unigene0028340(PSBO);Unigene0028558(At5g14050);Unigene0029833(THF1);Unig…
GO:0044459	plasma membrane part	0.0272735	Unigene0000168(CNGC2);Unigene0000283(ABCG18);Unigene0000445(ABCG11);Unigene0000565(YMF16);Unigene0000781(ABCG32);Unigene0000806(IPT1);Unigene0000815(ENODL1);Unigene0000849(ABCB4);Unigene0001160(STP14);Unigene0001190(--);Unigene0001435(IREG2);Unigene0001541(SUC1);Unigene0001644(PSBQ2);Unigene0002114(dnaJ);Unigene0002164(At1g76070);Unigene0002197(At4g34480);Unigene0002641(R1A-10);Unigene0002869(CNG…
GO:0042170	plastid membrane	0.050035	Unigene0000400(PHYLLO);Unigene0000659(PPT2);Unigene0000726(CRD1);Unigene0000936(TIC20-V);Unigene0000947(CHLG);Unigene0005402(TIC21);Unigene0005839(HXK1);Unigene0008045(DGD1);Unigene0008046(DGD1);Unigene0009836(CB5-A);Unigene0012121(TSPO);Unigene0012786(MIND1);Unigene0017466(LPP3);Unigene0018713(DIT1);Unigene0019197(FRO7);Unigene0019984(KO);Unigene0021227(AAE14);Unigene0021818(RBL10);Unigene002212…
GO:0042646	plastid nucleoid	0.0505898	Unigene0000973(CURT1B);Unigene0001497(PTAC16);Unigene0002950(FLN1);Unigene0010825(At5g66470);Unigene0014554(RAP);Unigene0017602(FSD3);Unigene0031125(FLN2);Unigene0032295(PTAC16);Unigene0033060(MTERF8);Unigene0033542(PTAC5)
GO:0031969	chloroplast membrane	0.0552572	Unigene0000400(PHYLLO);Unigene0000659(PPT2);Unigene0000726(CRD1);Unigene0000936(TIC20-V);Unigene0000947(CHLG);Unigene0005402(TIC21);Unigene0005839(HXK1);Unigene0008045(DGD1);Unigene0008046(DGD1);Unigene0009836(CB5-A);Unigene0012121(TSPO);Unigene0012786(MIND1);Unigene0017466(LPP3);Unigene0018713(DIT1);Unigene0019197(FRO7);Unigene0019984(KO);Unigene0021227(AAE14);Unigene0021818(RBL10);Unigene002212…
GO:0000229	cytoplasmic chromosome	0.0592305	Unigene0000973(CURT1B);Unigene0001497(PTAC16);Unigene0003324(--);Unigene0032295(PTAC16);Unigene0033060(MTERF8);Unigene0033542(PTAC5)
GO:0005680	anaphase-promoting complex	0.0695921	Unigene0000901(Os04g0590900);Unigene0001406(WAV3);Unigene0001532(SIS3);Unigene0002072(ATL6);Unigene0002690(ATL46);Unigene0003091(WAVH1);Unigene0004134(ATL60);Unigene0004534(NIP2);Unigene0005072(WAV3);Unigene0006689(SGR9);Unigene0008031(ATL65);Unigene0008553(ORTH2);Unigene0008615(RHA4A);Unigene0009020(ATL60);Unigene0009068(BRH1);Unigene0011636(EDA40);Unigene0012506(NIP1);Unigene0012745(RHG1A);Unig…
GO:0010319	stromule	0.104943	Unigene0001987(CSP41A);Unigene0009836(CB5-A);Unigene0011018(At1g67280);Unigene0015011(FBP);Unigene0018232(ATPD);Unigene0019072(At1g32060);Unigene0025833(SHM1);Unigene0025834(SHM1);Unigene0026625(PGM1);Unigene0029833(THF1);Unigene0030796(CSP41B);Unigene0033008(At1g32060);Unigene0034267(EO)
GO:0009532	plastid stroma	0.121064	Unigene0000428(NQR);Unigene0000458(HEME1);Unigene0000925(At3g55800);Unigene0000973(CURT1B);Unigene0001497(PTAC16);Unigene0001524(DHAD);Unigene0001644(PSBQ2);Unigene0001987(CSP41A);Unigene0002261(PHS1);Unigene0002603(RPL13);Unigene0002615(RPL18);Unigene0002925(GDCST);Unigene0002950(FLN1);Unigene0003258(RPL9);Unigene0003332(ATP1);Unigene0003428(ACPD);Unigene0003647(KAS3B);Unigene0003705(CARB);Unige…
GO:0042644	chloroplast nucleoid	0.121064	Unigene0001497(PTAC16);Unigene0002950(FLN1);Unigene0010825(At5g66470);Unigene0014554(RAP);Unigene0017602(FSD3);Unigene0031125(FLN2);Unigene0032295(PTAC16);Unigene0033542(PTAC5)
GO:0009543	chloroplast thylakoid lumen	0.13006	Unigene0004242(PPD2);Unigene0004387(FKBP19);Unigene0008520(PSAF);Unigene0011131(FKBP16-4);Unigene0015770(CLEB3J9);Unigene0021535(FKBP13);Unigene0021750(CTPA2);Unigene0028186(TL17);Unigene0029765(PRXQ);Unigene0030012(CYP37);Unigene0031643(TL20.3);Unigene0034555(At3g63540);Unigene0035540(PPD5)
GO:0031978	plastid thylakoid lumen	0.13006	Unigene0004242(PPD2);Unigene0004387(FKBP19);Unigene0008520(PSAF);Unigene0011131(FKBP16-4);Unigene0015770(CLEB3J9);Unigene0021535(FKBP13);Unigene0021750(CTPA2);Unigene0028186(TL17);Unigene0029765(PRXQ);Unigene0030012(CYP37);Unigene0031643(TL20.3);Unigene0034555(At3g63540);Unigene0035540(PPD5)
GO:1990391	DNA repair complex	0.148284	Unigene0000283(ABCG18);Unigene0000445(ABCG11);Unigene0000682(RECQL1);Unigene0000781(ABCG32);Unigene0000849(ABCB4);Unigene0000901(Os04g0590900);Unigene0000962(EIF4A1);Unigene0001532(SIS3);Unigene0002072(ATL6);Unigene0004134(ATL60);Unigene0005148(ABCG15);Unigene0005487(RAD4);Unigene0006575(ABCG11);Unigene0006689(SGR9);Unigene0007936(ABCG11);Unigene0008031(ATL65);Unigene0008246(ABCG36);Unigene000824…
GO:0009528	plastid inner membrane	0.150941	Unigene0000726(CRD1);Unigene0000936(TIC20-V);Unigene0005402(TIC21);Unigene0012786(MIND1);Unigene0018713(DIT1);Unigene0023625(GC1);Unigene0024249(CHLH);Unigene0026665(TIC55);Unigene0026777(PHT4;4);Unigene0026778(PHT4;4);Unigene0029244(TIC100);Unigene0029833(THF1);Unigene0030459(PHT2-1);Unigene0031734(PAO);Unigene0031746(GC1);Unigene0033190(TIC32);Unigene0033191(TIC32);Unigene0034041(cemA);Unigene0…
GO:0045177	apical part of cell	0.150941	Unigene0001904(OsI_16936);Unigene0002869(CNGC18);Unigene0011450(ROPGEF1);Unigene0012753(NCER1);Unigene0015613(ROPGEF14);Unigene0022353(NEDD1);Unigene0024083(PIN1A);Unigene0030454(REN1);Unigene0030797(VATE)
GO:0098807	chloroplast thylakoid membrane protein complex	0.150941	Unigene0000973(CURT1B);Unigene0009623(ATPC);Unigene0011179(LHCB4.1);Unigene0029259(PSAG);Unigene0029261(PSAG);Unigene0032513(LIR1);Unigene0033207(PETH);Unigene0033208(PETH);Unigene0034817(LHCB5)
GO:0009506	plasmodesma	0.152115	Unigene0000233(NPF8.3);Unigene0000786(At1g07660);Unigene0001250(IMK2);Unigene0001251(IMK2);Unigene0001259(CBF5);Unigene0002088(ERDJ3A);Unigene0003464(PUB28);Unigene0003478(SKU5);Unigene0003642(HMGS);Unigene0003919(EXL3);Unigene0004535(SPS1);Unigene0005615(CHER1);Unigene0005689(SCPL45);Unigene0005802(ANN4);Unigene0006581(At2g32450);Unigene0006647(COPT5.1);Unigene0007644(MORC6);Unigene0008297(RALFL…
GO:0055044	symplast	0.152115	Unigene0000233(NPF8.3);Unigene0000786(At1g07660);Unigene0001250(IMK2);Unigene0001251(IMK2);Unigene0001259(CBF5);Unigene0002088(ERDJ3A);Unigene0003464(PUB28);Unigene0003478(SKU5);Unigene0003642(HMGS);Unigene0003919(EXL3);Unigene0004535(SPS1);Unigene0005615(CHER1);Unigene0005689(SCPL45);Unigene0005802(ANN4);Unigene0006581(At2g32450);Unigene0006647(COPT5.1);Unigene0007644(MORC6);Unigene0008297(RALFL…
GO:0009508	plastid chromosome	0.154197	Unigene0000973(CURT1B);Unigene0001497(PTAC16);Unigene0032295(PTAC16);Unigene0033060(MTERF8);Unigene0033542(PTAC5)
GO:0000152	nuclear ubiquitin ligase complex	0.156679	Unigene0000901(Os04g0590900);Unigene0001406(WAV3);Unigene0001532(SIS3);Unigene0002072(ATL6);Unigene0002690(ATL46);Unigene0003091(WAVH1);Unigene0004134(ATL60);Unigene0004534(NIP2);Unigene0005072(WAV3);Unigene0006689(SGR9);Unigene0008031(ATL65);Unigene0008553(ORTH2);Unigene0008615(RHA4A);Unigene0009020(ATL60);Unigene0009068(BRH1);Unigene0011636(EDA40);Unigene0012506(NIP1);Unigene0012745(RHG1A);Unig…
GO:0055051	ATP-binding cassette (ABC) transporter complex, integrated substrate binding	0.221175	Unigene0000283(ABCG18);Unigene0000445(ABCG11);Unigene0000781(ABCG32);Unigene0000849(ABCB4);Unigene0003967(CLPX1);Unigene0005148(ABCG15);Unigene0006575(ABCG11);Unigene0007936(ABCG11);Unigene0008246(ABCG36);Unigene0008248(PDR1);Unigene0014934(ABCC4);Unigene0015722(SMC4);Unigene0017133(AKN);Unigene0022231(ABCG28);Unigene0023607(ABCG39);Unigene0024041(ABCI6);Unigene0025224(ABCC9);Unigene0026121(ABCG1…
GO:0031984	organelle subcompartment	0.221175	Unigene0000263(AUR3);Unigene0000337(DVR);Unigene0000726(CRD1);Unigene0000817(PAP8);Unigene0000936(TIC20-V);Unigene0000947(CHLG);Unigene0000973(CURT1B);Unigene0001105(TPST);Unigene0001497(PTAC16);Unigene0001551(CSLC5);Unigene0001644(PSBQ2);Unigene0001772(DIM);Unigene0001911(At4g00750);Unigene0001955(PPF-1);Unigene0001987(CSP41A);Unigene0002637(PDCD2);Unigene0002696(CSLA2);Unigene0002879(BASS2);Uni…
GO:0005911	cell-cell junction	0.221175	Unigene0000233(NPF8.3);Unigene0000786(At1g07660);Unigene0001250(IMK2);Unigene0001251(IMK2);Unigene0001259(CBF5);Unigene0002088(ERDJ3A);Unigene0003464(PUB28);Unigene0003478(SKU5);Unigene0003642(HMGS);Unigene0003919(EXL3);Unigene0004535(SPS1);Unigene0005615(CHER1);Unigene0005689(SCPL45);Unigene0005802(ANN4);Unigene0006581(At2g32450);Unigene0006647(COPT5.1);Unigene0007644(MORC6);Unigene0008297(RALFL…
GO:0009706	chloroplast inner membrane	0.221175	Unigene0000726(CRD1);Unigene0000936(TIC20-V);Unigene0005402(TIC21);Unigene0012786(MIND1);Unigene0018713(DIT1);Unigene0023625(GC1);Unigene0024249(CHLH);Unigene0026665(TIC55);Unigene0026777(PHT4;4);Unigene0026778(PHT4;4);Unigene0029244(TIC100);Unigene0030459(PHT2-1);Unigene0031734(PAO);Unigene0031746(GC1);Unigene0033190(TIC32);Unigene0033191(TIC32);Unigene0034041(cemA);Unigene0034827(PLGG1);Unigene…
GO:0043659	symbiosome	0.221175	Unigene0008045(DGD1);Unigene0008046(DGD1);Unigene0020143(At2g25060);Unigene0024997(DGD2)
GO:0043660	bacteroid-containing symbiosome	0.221175	Unigene0008045(DGD1);Unigene0008046(DGD1);Unigene0020143(At2g25060);Unigene0024997(DGD2)
GO:0043661	peribacteroid membrane	0.221175	Unigene0008045(DGD1);Unigene0008046(DGD1);Unigene0020143(At2g25060);Unigene0024997(DGD2)
GO:0016324	apical plasma membrane	0.24424	Unigene0002869(CNGC18);Unigene0011450(ROPGEF1);Unigene0012753(NCER1);Unigene0015613(ROPGEF14);Unigene0030454(REN1);Unigene0030797(VATE)
GO:0000325	plant-type vacuole	0.292767	Unigene0001434(MOT2);Unigene0003574(TIP1-1);Unigene0005615(CHER1);Unigene0006412(CLC-A);Unigene0009423(OCT1);Unigene0019116(TOM1);Unigene0021633(SUC4);Unigene0022847(MSSP2);Unigene0023396(TIP4-1);Unigene0025224(ABCC9);Unigene0026504(PAH1);Unigene0027093(SRC2);Unigene0027332(At5g61350);Unigene0027403(ABCC4);Unigene0029361(VHA-a3);Unigene0031777(NCL);Unigene0031808(CLC-C);Unigene0032198(MTP4);Unige…
GO:0055052	ATP-binding cassette (ABC) transporter complex, substrate-binding subunit-containing	0.319176	Unigene0000283(ABCG18);Unigene0000445(ABCG11);Unigene0000781(ABCG32);Unigene0000849(ABCB4);Unigene0005148(ABCG15);Unigene0006575(ABCG11);Unigene0007936(ABCG11);Unigene0008144(IPT1);Unigene0008246(ABCG36);Unigene0008248(PDR1);Unigene0014934(ABCC4);Unigene0016304(At1g68190);Unigene0017133(AKN);Unigene0019072(At1g32060);Unigene0022231(ABCG28);Unigene0023607(ABCG39);Unigene0024041(ABCI6);Unigene00241…
GO:0000220	vacuolar proton-transporting V-type ATPase, V0 domain	0.322326	Unigene0003716(VHA-c''1);Unigene0026912(VHA-a3);Unigene0029361(VHA-a3)
GO:0005950	anthranilate synthase complex	0.322326	Unigene0007167(ASA1);Unigene0023865(ASB1);Unigene0028373(ASA1)
GO:0030093	chloroplast photosystem I	0.322326	Unigene0000973(CURT1B);Unigene0029259(PSAG);Unigene0029261(PSAG)
GO:0032432	actin filament bundle	0.322326	Unigene0020058(FIM5);Unigene0027911(VLN3);Unigene0031819(FIM2)
GO:0009380	excinuclease repair complex	0.333042	Unigene0000283(ABCG18);Unigene0000445(ABCG11);Unigene0000682(RECQL1);Unigene0000781(ABCG32);Unigene0000849(ABCB4);Unigene0000962(EIF4A1);Unigene0005148(ABCG15);Unigene0006575(ABCG11);Unigene0007936(ABCG11);Unigene0008246(ABCG36);Unigene0008248(PDR1);Unigene0010524(FANCM);Unigene0014934(ABCC4);Unigene0015470(NEN3);Unigene0017133(AKN);Unigene0022231(ABCG28);Unigene0023607(ABCG39);Unigene0024041(ABC…
GO:0010287	plastoglobule	0.386662	Unigene0001987(CSP41A);Unigene0005509(FBA1);Unigene0005510(FBA2);Unigene0008520(PSAF);Unigene0015345(CCD4);Unigene0018232(ATPD);Unigene0023108(LHCA1);Unigene0024720(PAP6);Unigene0025205(At1g54570);Unigene0028076(CAB13);Unigene0028218(PAP4);Unigene0030796(CSP41B);Unigene0033898(At2g34460);Unigene0034817(LHCB5);Unigene0035463(CAP10A)
GO:0005951	carbamoyl-phosphate synthase complex	0.419401	Unigene0000027(ctps);Unigene0003705(CARB);Unigene0003706(CARB);Unigene0020326(HISN4);Unigene0023865(ASB1);Unigene0023866(XTH28);Unigene0028309(POPTRDRAFT_831870);Unigene0029644(HIPP39);Unigene0032446(GAT1_2.1);Unigene0035558(GGP5)
GO:0009705	plant-type vacuole membrane	0.441304	Unigene0001434(MOT2);Unigene0003574(TIP1-1);Unigene0005615(CHER1);Unigene0006412(CLC-A);Unigene0009423(OCT1);Unigene0019116(TOM1);Unigene0021633(SUC4);Unigene0022847(MSSP2);Unigene0023396(TIP4-1);Unigene0026504(PAH1);Unigene0027093(SRC2);Unigene0027332(At5g61350);Unigene0029361(VHA-a3);Unigene0031808(CLC-C);Unigene0032198(MTP4);Unigene0032561(NRT2.5)
GO:0000427	plastid-encoded plastid RNA polymerase complex	0.441304	Unigene0030796(CSP41B);Unigene0031125(FLN2)
GO:0045178	basal part of cell	0.441304	Unigene0017058(KIN10);Unigene0024083(PIN1A)
GO:0030054	cell junction	0.482915	Unigene0000233(NPF8.3);Unigene0000786(At1g07660);Unigene0001250(IMK2);Unigene0001251(IMK2);Unigene0001259(CBF5);Unigene0002088(ERDJ3A);Unigene0002114(dnaJ);Unigene0003464(PUB28);Unigene0003478(SKU5);Unigene0003642(HMGS);Unigene0003919(EXL3);Unigene0004535(SPS1);Unigene0005615(CHER1);Unigene0005689(SCPL45);Unigene0005802(ANN4);Unigene0006581(At2g32450);Unigene0006647(COPT5.1);Unigene0007124(LIP);U…
GO:0042555	MCM complex	0.525752	Unigene0003298(MCM2);Unigene0013891(OsI_36121);Unigene0033898(At2g34460);Unigene0034338(MCM6);Unigene0034339(MCM6)
GO:0010007	magnesium chelatase complex	0.678986	Unigene0001406(WAV3);Unigene0005072(WAV3);Unigene0009996(CHLI);Unigene0009997(CHLI);Unigene0024249(CHLH);Unigene0032777(CHLD);Unigene0035248(--)
GO:0009538	photosystem I reaction center	0.678986	Unigene0002953(PSB27-1);Unigene0003458(rplR);Unigene0006713(PSAH);Unigene0006714(PSAH);Unigene0008362(PSB28);Unigene0008520(PSAF);Unigene0016692(psaD);Unigene0016693(psaD);Unigene0021460(PSAK);Unigene0021461(PSAK);Unigene0032671(EXLA1);Unigene0034656(PSAE);Unigene0034657(PSAE-1);Unigene0035436(PSAH);Unigene0036332(IAA12)
GO:0000109	nucleotide-excision repair complex	0.693986	Unigene0000901(Os04g0590900);Unigene0001532(SIS3);Unigene0002072(ATL6);Unigene0004134(ATL60);Unigene0005487(RAD4);Unigene0006689(SGR9);Unigene0008031(ATL65);Unigene0008492(RMA1H1);Unigene0008553(ORTH2);Unigene0008615(RHA4A);Unigene0010216(BAH1);Unigene0011576(--);Unigene0012506(NIP1);Unigene0012745(RHG1A);Unigene0012931(--);Unigene0014304(ATL16);Unigene0014755(SDIR1);Unigene0015473(--);Unigene001…
GO:0009654	photosystem II oxygen evolving complex	0.693986	Unigene0001644(PSBQ2);Unigene0004242(PPD2);Unigene0008362(PSB28);Unigene0019269(PSKR);Unigene0025973(PPD7);Unigene0026592(PSBP);Unigene0028337(PSBO);Unigene0028340(PSBO);Unigene0031009(PSBR);Unigene0031106(At4g16563);Unigene0033304(PSBP1);Unigene0034555(At3g63540);Unigene0035540(PPD5)
GO:0009898	cytoplasmic side of plasma membrane	0.732245	Unigene0000283(ABCG18);Unigene0000445(ABCG11);Unigene0000781(ABCG32);Unigene0000849(ABCB4);Unigene0002641(R1A-10);Unigene0004789(PHOT1);Unigene0005148(ABCG15);Unigene0005642(SYT3);Unigene0006575(ABCG11);Unigene0007936(ABCG11);Unigene0008144(IPT1);Unigene0008246(ABCG36);Unigene0008248(PDR1);Unigene0012771(--);Unigene0014934(ABCC4);Unigene0015369(XLG1);Unigene0017133(AKN);Unigene0019072(At1g32060);…
GO:0031461	cullin-RING ubiquitin ligase complex	0.778467	Unigene0000901(Os04g0590900);Unigene0001371(BT3);Unigene0001406(WAV3);Unigene0001532(SIS3);Unigene0002072(ATL6);Unigene0002690(ATL46);Unigene0003091(WAVH1);Unigene0004134(ATL60);Unigene0004534(NIP2);Unigene0005072(WAV3);Unigene0005974(At1g55760);Unigene0006689(SGR9);Unigene0007714(SPA2);Unigene0008031(ATL65);Unigene0008553(ORTH2);Unigene0008615(RHA4A);Unigene0009020(ATL60);Unigene0009068(BRH1);Un…
GO:0009342	glutamate synthase complex (NADPH)	0.902424	Unigene0000366(CHLP);Unigene0000625(ZDS);Unigene0007380(At1g12200);Unigene0007939(PAO2);Unigene0011656(NTR1);Unigene0020507(fadD28);Unigene0022926(CHLP);Unigene0025689(ufaA1);Unigene0029400(--);Unigene0031029(YUC4);Unigene0033638(SQE1);Unigene0033639(SQE1);Unigene0036067(YUC3)
GO:0031026	glutamate synthase complex	0.902424	Unigene0000366(CHLP);Unigene0000625(ZDS);Unigene0007380(At1g12200);Unigene0007939(PAO2);Unigene0011656(NTR1);Unigene0020507(fadD28);Unigene0022926(CHLP);Unigene0025689(ufaA1);Unigene0029400(--);Unigene0031029(YUC4);Unigene0033638(SQE1);Unigene0033639(SQE1);Unigene0036067(YUC3)
GO:0000322	storage vacuole	0.905457	Unigene0016904(WAV2);Unigene0017058(KIN10);Unigene0017944(FAB1A);Unigene0024444(HACD2);Unigene0026504(PAH1);Unigene0027093(SRC2);Unigene0027194(At2g16790);Unigene0030797(VATE);Unigene0031116(--);Unigene0031943(FAB1B);Unigene0035882(INV*DC4);Unigene0035883(INV*DC4)
GO:0009533	chloroplast stromal thylakoid	0.905457	Unigene0010420(PSBY);Unigene0017460(PNSL5);Unigene0034287(HCF136)
GO:0070449	elongin complex	0.905457	Unigene0005347(At2g41170);Unigene0026623(At2g32560);Unigene0026977(MED26C)
GO:0098562	cytoplasmic side of membrane	0.905457	Unigene0000283(ABCG18);Unigene0000445(ABCG11);Unigene0000781(ABCG32);Unigene0000849(ABCB4);Unigene0002641(R1A-10);Unigene0004789(PHOT1);Unigene0005148(ABCG15);Unigene0005642(SYT3);Unigene0006575(ABCG11);Unigene0007936(ABCG11);Unigene0008144(IPT1);Unigene0008246(ABCG36);Unigene0008248(PDR1);Unigene0012771(--);Unigene0014934(ABCC4);Unigene0015369(XLG1);Unigene0017133(AKN);Unigene0019072(At1g32060);…
GO:0005903	brush border	0.905457	Unigene0022336(BGLU44);Unigene0024910(TRE1)
GO:0032009	early phagosome	0.905457	Unigene0026912(VHA-a3);Unigene0029361(VHA-a3)
GO:0032586	protein storage vacuole membrane	0.905457	Unigene0026504(PAH1);Unigene0027093(SRC2)
GO:0036449	microtubule minus-end	0.905457	Unigene0026114(CSI1);Unigene0026115(CSI1)
GO:0098572	stromal side of plastid thylakoid membrane	0.905457	Unigene0001497(PTAC16);Unigene0032295(PTAC16)
GO:0098862	cluster of actin-based cell projections	0.905457	Unigene0022336(BGLU44);Unigene0024910(TRE1)
GO:0098533	ATPase dependent transmembrane transport complex	1	Unigene0000226(HMA4);Unigene0000283(ABCG18);Unigene0000445(ABCG11);Unigene0000781(ABCG32);Unigene0000806(IPT1);Unigene0000849(ABCB4);Unigene0001571(HMA5);Unigene0002164(At1g76070);Unigene0003967(CLPX1);Unigene0004478(RAN1);Unigene0004957(HMA4);Unigene0005148(ABCG15);Unigene0006575(ABCG11);Unigene0007316(ALA9);Unigene0007936(ABCG11);Unigene0008144(IPT1);Unigene0008246(ABCG36);Unigene0008248(PDR1);…
GO:0009295	nucleoid	1	Unigene0000973(CURT1B);Unigene0001497(PTAC16);Unigene0002114(dnaJ);Unigene0002950(FLN1);Unigene0003324(--);Unigene0010825(At5g66470);Unigene0014554(RAP);Unigene0017602(FSD3);Unigene0031125(FLN2);Unigene0031782(GYRB);Unigene0032295(PTAC16);Unigene0033060(MTERF8);Unigene0033542(PTAC5)
GO:0031004	potassium ion-transporting ATPase complex	1	Unigene0000226(HMA4);Unigene0001571(HMA5);Unigene0004478(RAN1);Unigene0004957(HMA4);Unigene0007316(ALA9);Unigene0011512(LCA1);Unigene0012869(ACA13);Unigene0014806(ALA8);Unigene0018086(PMA4);Unigene0019113(ALA7);Unigene0025128(PAA2);Unigene0027281(HMA4);Unigene0028066(ACA8);Unigene0034613(ALA4);Unigene0035906(PMA3)
GO:0045250	cytosolic pyruvate dehydrogenase complex	1	Unigene0003368(At5g09300);Unigene0028847(At1g21400);Unigene0030692(Os07g0190000);Unigene0031815(Os07g0190000);Unigene0031878(TKL-2);Unigene0036509(TKT2)
GO:0000326	protein storage vacuole	1	Unigene0026504(PAH1);Unigene0027093(SRC2)
GO:0000805	X chromosome	1	Unigene0017058(KIN10);Unigene0022290(--)
GO:0009503	thylakoid light-harvesting complex	1	Unigene0011179(LHCB4.1);Unigene0034817(LHCB5)
GO:0010330	cellulose synthase complex	1	Unigene0026114(CSI1);Unigene0026115(CSI1)
GO:0046861	glyoxysomal membrane	1	Unigene0026720(PXN);Unigene0026721(PXN)
GO:0000324	fungal-type vacuole	1	Unigene0016904(WAV2);Unigene0017058(KIN10);Unigene0017944(FAB1A);Unigene0024444(HACD2);Unigene0027194(At2g16790);Unigene0030797(VATE);Unigene0031116(--);Unigene0031943(FAB1B);Unigene0035882(INV*DC4);Unigene0035883(INV*DC4)
GO:0030867	rough endoplasmic reticulum membrane	1	Unigene0000494(--);Unigene0019499(--);Unigene0019974(RPS28);Unigene0025515(BGLU40);Unigene0028161(--);Unigene0028570(RISBZ4);Unigene0028994(RBK1)
GO:0043190	ATP-binding cassette (ABC) transporter complex	1	Unigene0000283(ABCG18);Unigene0000445(ABCG11);Unigene0000781(ABCG32);Unigene0000806(IPT1);Unigene0000849(ABCB4);Unigene0002164(At1g76070);Unigene0003967(CLPX1);Unigene0005148(ABCG15);Unigene0006575(ABCG11);Unigene0007936(ABCG11);Unigene0008144(IPT1);Unigene0008246(ABCG36);Unigene0008248(PDR1);Unigene0014934(ABCC4);Unigene0015722(SMC4);Unigene0016304(At1g68190);Unigene0017133(AKN);Unigene0019072(A…
GO:0098552	side of membrane	1	Unigene0000283(ABCG18);Unigene0000445(ABCG11);Unigene0000781(ABCG32);Unigene0000849(ABCB4);Unigene0001497(PTAC16);Unigene0002641(R1A-10);Unigene0004789(PHOT1);Unigene0005148(ABCG15);Unigene0005642(SYT3);Unigene0006575(ABCG11);Unigene0007936(ABCG11);Unigene0008144(IPT1);Unigene0008246(ABCG36);Unigene0008248(PDR1);Unigene0012771(--);Unigene0014934(ABCC4);Unigene0015369(XLG1);Unigene0017133(AKN);Uni…
GO:0000111	nucleotide-excision repair factor 2 complex	1	Unigene0005487(RAD4)
GO:0000262	mitochondrial chromosome	1	Unigene0003324(--)
GO:0000806	Y chromosome	1	Unigene0017058(KIN10)
GO:0001518	voltage-gated sodium channel complex	1	Unigene0029244(TIC100)
GO:0005619	ascospore wall	1	Unigene0025752(WAXY)
GO:0005641	nuclear envelope lumen	1	Unigene0017058(KIN10)
GO:0005756	mitochondrial proton-transporting ATP synthase, central stalk	1	Unigene0016702(--)
GO:0005913	cell-cell adherens junction	1	Unigene0028871(ssx2ip-a)
GO:0005934	cellular bud tip	1	Unigene0031769(TRN1)
GO:0005955	calcineurin complex	1	Unigene0016464(CBL7)
GO:0009375	ferredoxin hydrogenase complex	1	Unigene0025797(AP180)
GO:0009510	plasmodesmatal desmotubule	1	Unigene0024696(FTIP1)
GO:0009511	plasmodesmatal endoplasmic reticulum	1	Unigene0024696(FTIP1)
GO:0009925	basal plasma membrane	1	Unigene0024083(PIN1A)
GO:0016222	procollagen-proline 4-dioxygenase complex	1	Unigene0002594(P4H10)
GO:0017086	3-methyl-2-oxobutanoate dehydrogenase (lipoamide) complex	1	Unigene0003368(At5g09300)
GO:0019038	provirus	1	Unigene0033519(ATHB-13)
GO:0031160	spore wall	1	Unigene0025752(WAXY)
GO:0031510	SUMO activating enzyme complex	1	Unigene0031635(SAE2)
GO:0031588	nucleotide-activated protein kinase complex	1	Unigene0017058(KIN10)
GO:0031592	centrosomal corona	1	Unigene0022206(JGB)
GO:0032301	MutSalpha complex	1	Unigene0029061(MSH2)
GO:0032302	MutSbeta complex	1	Unigene0029061(MSH2)
GO:0032578	aleurone grain membrane	1	Unigene0000815(ENODL1)
GO:0032865	ERMES complex	1	Unigene0006512(TOM40-1)
GO:0033095	aleurone grain	1	Unigene0000815(ENODL1)
GO:0034451	centriolar satellite	1	Unigene0028871(ssx2ip-a)
GO:0034706	sodium channel complex	1	Unigene0029244(TIC100)
GO:0045269	proton-transporting ATP synthase, central stalk	1	Unigene0016702(--)
GO:0071942	XPC complex	1	Unigene0005487(RAD4)
GO:0072669	tRNA-splicing ligase complex	1	Unigene0032222(CHUP1)
GO:0097123	cyclin A1-CDK2 complex	1	Unigene0017058(KIN10)
GO:0097124	cyclin A2-CDK2 complex	1	Unigene0017058(KIN10)
GO:0097134	cyclin E1-CDK2 complex	1	Unigene0017058(KIN10)
GO:0097135	cyclin E2-CDK2 complex	1	Unigene0017058(KIN10)
GO:1990794	basolateral part of cell	1	Unigene0017058(KIN10)
GO:0005744	mitochondrial inner membrane presequence translocase complex	1	Unigene0001456(TIM8);Unigene0017417(TIM21);Unigene0023297(ALS3);Unigene0033742(TIM23-1)
GO:0005779	integral component of peroxisomal membrane	1	Unigene0015286(PEX11C);Unigene0025397(CYP76T24);Unigene0026720(PXN);Unigene0026721(PXN);Unigene0027819(OVA4);Unigene0029961(PEX11D)
GO:0031231	intrinsic component of peroxisomal membrane	1	Unigene0015286(PEX11C);Unigene0025397(CYP76T24);Unigene0026720(PXN);Unigene0026721(PXN);Unigene0027819(OVA4);Unigene0029961(PEX11D)
GO:0000148	1,3-beta-D-glucan synthase complex	1	Unigene0004006(CALS5);Unigene0026391(CALS11);Unigene0031289(CALS7);Unigene0031290(CALS3)
GO:0039679	viral occlusion body	1	Unigene0001078(SYP125);Unigene0020969(SYP125);Unigene0024496(SYP51);Unigene0031813(--)
GO:0044232	organelle membrane contact site	1	Unigene0005642(SYT3);Unigene0006512(TOM40-1);Unigene0027863(SYT3);Unigene0031116(--)
GO:1902495	transmembrane transporter complex	1	Unigene0000226(HMA4);Unigene0000283(ABCG18);Unigene0000445(ABCG11);Unigene0000781(ABCG32);Unigene0000806(IPT1);Unigene0000849(ABCB4);Unigene0001571(HMA5);Unigene0002164(At1g76070);Unigene0003967(CLPX1);Unigene0004478(RAN1);Unigene0004957(HMA4);Unigene0005148(ABCG15);Unigene0006412(CLC-A);Unigene0006575(ABCG11);Unigene0007316(ALA9);Unigene0007936(ABCG11);Unigene0008144(IPT1);Unigene0008246(ABCG36)…
GO:1990351	transporter complex	1	Unigene0000226(HMA4);Unigene0000283(ABCG18);Unigene0000445(ABCG11);Unigene0000781(ABCG32);Unigene0000806(IPT1);Unigene0000849(ABCB4);Unigene0001456(TIM8);Unigene0001571(HMA5);Unigene0002164(At1g76070);Unigene0003967(CLPX1);Unigene0004478(RAN1);Unigene0004957(HMA4);Unigene0005148(ABCG15);Unigene0006412(CLC-A);Unigene0006575(ABCG11);Unigene0007316(ALA9);Unigene0007936(ABCG11);Unigene0008144(IPT1);U…
GO:0090533	cation-transporting ATPase complex	1	Unigene0000226(HMA4);Unigene0001571(HMA5);Unigene0004478(RAN1);Unigene0004957(HMA4);Unigene0007316(ALA9);Unigene0011512(LCA1);Unigene0012869(ACA13);Unigene0014806(ALA8);Unigene0018086(PMA4);Unigene0019113(ALA7);Unigene0025128(PAA2);Unigene0027281(HMA4);Unigene0028066(ACA8);Unigene0034613(ALA4);Unigene0035906(PMA3)
GO:0005778	peroxisomal membrane	1	Unigene0004248(AAE3);Unigene0015286(PEX11C);Unigene0021227(AAE14);Unigene0025397(CYP76T24);Unigene0026465(HMGR2);Unigene0026720(PXN);Unigene0026721(PXN);Unigene0027819(OVA4);Unigene0029961(PEX11D);Unigene0035273(AAE14)
GO:0031903	microbody membrane	1	Unigene0004248(AAE3);Unigene0015286(PEX11C);Unigene0021227(AAE14);Unigene0025397(CYP76T24);Unigene0026465(HMGR2);Unigene0026720(PXN);Unigene0026721(PXN);Unigene0027819(OVA4);Unigene0029961(PEX11D);Unigene0035273(AAE14)
GO:0031164	contractile vacuolar membrane	1	Unigene0026912(VHA-a3);Unigene0029361(VHA-a3);Unigene0030797(VATE)
GO:0005791	rough endoplasmic reticulum	1	Unigene0000494(--);Unigene0019499(--);Unigene0019974(RPS28);Unigene0025515(BGLU40);Unigene0028161(--);Unigene0028570(RISBZ4);Unigene0028994(RBK1);Unigene0030385(SPPL1)
GO:0009527	plastid outer membrane	1	Unigene0005839(HXK1);Unigene0008045(DGD1);Unigene0008046(DGD1);Unigene0009836(CB5-A);Unigene0019984(KO);Unigene0024997(DGD2);Unigene0029833(THF1);Unigene0033509(HXK2)
GO:0009707	chloroplast outer membrane	1	Unigene0005839(HXK1);Unigene0008045(DGD1);Unigene0008046(DGD1);Unigene0009836(CB5-A);Unigene0019984(KO);Unigene0024997(DGD2);Unigene0029833(THF1);Unigene0033509(HXK2)
GO:0000811	GINS complex	1	Unigene0008561(GINS1);Unigene0031881(--)
GO:0012511	monolayer-surrounded lipid storage body	1	Unigene0012733(MATP6-A);Unigene0031129(At4g25140)
GO:0071162	CMG complex	1	Unigene0008561(GINS1);Unigene0031881(--)
GO:1904949	ATPase complex	1	Unigene0000226(HMA4);Unigene0000283(ABCG18);Unigene0000445(ABCG11);Unigene0000781(ABCG32);Unigene0000806(IPT1);Unigene0000849(ABCB4);Unigene0001571(HMA5);Unigene0002164(At1g76070);Unigene0003967(CLPX1);Unigene0004478(RAN1);Unigene0004957(HMA4);Unigene0005148(ABCG15);Unigene0006575(ABCG11);Unigene0007316(ALA9);Unigene0007936(ABCG11);Unigene0008144(IPT1);Unigene0008246(ABCG36);Unigene0008248(PDR1);…
GO:0019005	SCF ubiquitin ligase complex	1	Unigene0001371(BT3);Unigene0005974(At1g55760);Unigene0012286(SKP1A);Unigene0017383(At2g30600/At2g30610);Unigene0018925(At3g56230);Unigene0019651(At2g44130);Unigene0035724(BT1)
GO:0005884	actin filament	1	Unigene0002114(dnaJ);Unigene0020058(FIM5);Unigene0028651(ADF7);Unigene0031819(FIM2)
GO:0005881	cytoplasmic microtubule	1	Unigene0013385(CLASP);Unigene0026114(CSI1);Unigene0026115(CSI1);Unigene0028582(KIN8B);Unigene0031532(PCAP1);Unigene0033923(AIR9)
GO:0030666	endocytic vesicle membrane	1	Unigene0008045(DGD1);Unigene0008046(DGD1);Unigene0020143(At2g25060);Unigene0024997(DGD2);Unigene0026912(VHA-a3);Unigene0029361(VHA-a3)
GO:0044438	microbody part	1	Unigene0004248(AAE3);Unigene0013235(MLS);Unigene0015286(PEX11C);Unigene0015469(URIII);Unigene0021227(AAE14);Unigene0025397(CYP76T24);Unigene0026465(HMGR2);Unigene0026720(PXN);Unigene0026721(PXN);Unigene0027819(OVA4);Unigene0029961(PEX11D);Unigene0035273(AAE14)
GO:0044439	peroxisomal part	1	Unigene0004248(AAE3);Unigene0013235(MLS);Unigene0015286(PEX11C);Unigene0015469(URIII);Unigene0021227(AAE14);Unigene0025397(CYP76T24);Unigene0026465(HMGR2);Unigene0026720(PXN);Unigene0026721(PXN);Unigene0027819(OVA4);Unigene0029961(PEX11D);Unigene0035273(AAE14)
GO:0000307	cyclin-dependent protein kinase holoenzyme complex	1	Unigene0011581(CYCT1-1);Unigene0017058(KIN10);Unigene0021457(CDKB1-2)
GO:0005697	telomerase holoenzyme complex	1	Unigene0001259(CBF5);Unigene0032518(CRK42);Unigene0032784(SMG7L)
GO:0005828	kinetochore microtubule	1	Unigene0013385(CLASP);Unigene0022353(NEDD1);Unigene0028582(KIN8B)
GO:0055028	cortical microtubule	1	Unigene0026114(CSI1);Unigene0026115(CSI1);Unigene0033923(AIR9)
GO:0005773	vacuole	1	Unigene0000786(At1g07660);Unigene0000815(ENODL1);Unigene0000866(BGAL10);Unigene0001093(SCPL50);Unigene0001434(MOT2);Unigene0001453(COR2);Unigene0001771(DIM);Unigene0001772(DIM);Unigene0002088(ERDJ3A);Unigene0002859(BACOVA_02659);Unigene0003574(TIP1-1);Unigene0003594(MTP9);Unigene0003648(--);Unigene0003716(VHA-c''1);Unigene0004138(PER17);Unigene0004246(UBI11);Unigene0004789(PHOT1);Unigene0004841(B…
GO:0045095	keratin filament	1	Unigene0010862(At2g19810);Unigene0023524(--)
GO:0070772	PAS complex	1	Unigene0017944(FAB1A);Unigene0031943(FAB1B)
GO:0097224	sperm connecting piece	1	Unigene0028091(DNAJB13);Unigene0031179(TPT)
GO:0009514	glyoxysome	1	Unigene0013235(MLS);Unigene0013282(PED1);Unigene0026720(PXN);Unigene0026721(PXN)
GO:0098590	plasma membrane region	1	Unigene0001435(IREG2);Unigene0002114(dnaJ);Unigene0002869(CNGC18);Unigene0011450(ROPGEF1);Unigene0012753(NCER1);Unigene0015613(ROPGEF14);Unigene0024083(PIN1A);Unigene0024982(PPC6-7);Unigene0026689(--);Unigene0030454(REN1);Unigene0030797(VATE)
GO:0099513	polymeric cytoskeletal fiber	1	Unigene0000015(TUBB1);Unigene0000344(TUBB1);Unigene0000984(CCT4);Unigene0002114(dnaJ);Unigene0006020(KIN14I);Unigene0009344(KIN5B);Unigene0010862(At2g19810);Unigene0013385(CLASP);Unigene0013572(TUBA3);Unigene0015491(KIN12D);Unigene0015492(KIN12D);Unigene0015493(--);Unigene0020058(FIM5);Unigene0022206(JGB);Unigene0022353(NEDD1);Unigene0023524(--);Unigene0023772(TUBB);Unigene0023776(TUBB1);Unigene0…
GO:0000408	EKC/KEOPS complex	1	Unigene0018721(--)
GO:0005880	nuclear microtubule	1	Unigene0028582(KIN8B)
GO:0009349	riboflavin synthase complex	1	Unigene0025602(At2g44050)
GO:0009517	PSII associated light-harvesting complex II	1	Unigene0034817(LHCB5)
GO:0009783	photosystem II antenna complex	1	Unigene0034817(LHCB5)
GO:0009923	fatty acid elongase complex	1	Unigene0005128(ECR)
GO:0019015	viral genome	1	Unigene0033519(ATHB-13)
GO:0031207	Sec62/Sec63 complex	1	Unigene0025515(BGLU40)
GO:0031428	box C/D snoRNP complex	1	Unigene0029335(EMB2271)
GO:0032545	CURI complex	1	Unigene0014901(Nol6)
GO:0032839	dendrite cytoplasm	1	Unigene0016904(WAV2)
GO:0034456	UTP-C complex	1	Unigene0014901(Nol6)
GO:0035618	root hair	1	Unigene0032198(MTP4)
GO:0042585	germinal vesicle	1	Unigene0028558(At5g14050)
GO:0042601	endospore-forming forespore	1	Unigene0027846(RABA6A)
GO:0042719	mitochondrial intermembrane space protein transporter complex	1	Unigene0001456(TIM8)
GO:0044233	ER-mitochondrion membrane contact site	1	Unigene0006512(TOM40-1)
GO:0071021	U2-type post-spliceosomal complex	1	Unigene0017590(OsI_27673)
GO:0071563	Myo2p-Vac17p-Vac8p transport complex	1	Unigene0031116(--)
GO:0071958	new mitotic spindle pole body	1	Unigene0032452(M3KE1)
GO:0097524	sperm plasma membrane	1	Unigene0024303(PPCK2)
GO:0098556	cytoplasmic side of rough endoplasmic reticulum membrane	1	Unigene0019974(RPS28)
GO:0005930	axoneme	1	Unigene0027296(--);Unigene0028091(DNAJB13);Unigene0028582(KIN8B);Unigene0031179(TPT);Unigene0032434(tif34)
GO:0097014	ciliary plasm	1	Unigene0027296(--);Unigene0028091(DNAJB13);Unigene0028582(KIN8B);Unigene0031179(TPT);Unigene0032434(tif34)
GO:0009331	glycerol-3-phosphate dehydrogenase complex	1	Unigene0003503(At2g24580);Unigene0003504(At2g24580);Unigene0012170(LPD2);Unigene0023790(GPDH);Unigene0031387(MO2);Unigene0035497(Os01g0939600)
GO:0010369	chromocenter	1	Unigene0008553(ORTH2);Unigene0017976(ORTH2);Unigene0017978(ORTH2)
GO:0030075	bacterial thylakoid	1	Unigene0001644(PSBQ2);Unigene0019269(PSKR);Unigene0029833(THF1)
GO:0030096	plasma membrane-derived thylakoid photosystem II	1	Unigene0001644(PSBQ2);Unigene0019269(PSKR);Unigene0029833(THF1)
GO:0030981	cortical microtubule cytoskeleton	1	Unigene0026114(CSI1);Unigene0026115(CSI1);Unigene0033923(AIR9)
GO:0019031	viral envelope	1	Unigene0000707(PCMP-H24);Unigene0003918(LECRKS7);Unigene0010975(--);Unigene0012248(PMEU1);Unigene0017797(KIP1);Unigene0018622(--);Unigene0021489(apoeb);Unigene0022050(HSP70);Unigene0024787(--);Unigene0027160(PHS2);Unigene0027204(At3g55350);Unigene0032408(RING1);Unigene0033667(MRS2-I);Unigene0034871(--)
GO:0036338	viral membrane	1	Unigene0000707(PCMP-H24);Unigene0003918(LECRKS7);Unigene0010975(--);Unigene0012248(PMEU1);Unigene0017797(KIP1);Unigene0018622(--);Unigene0021489(apoeb);Unigene0022050(HSP70);Unigene0024787(--);Unigene0027160(PHS2);Unigene0027204(At3g55350);Unigene0032408(RING1);Unigene0033667(MRS2-I);Unigene0034871(--)
GO:0009501	amyloplast	1	Unigene0002261(PHS1);Unigene0006689(SGR9);Unigene0014085(SBEI);Unigene0017789(SGR9);Unigene0025752(WAXY);Unigene0032534(SBE3)
GO:0009318	exodeoxyribonuclease VII complex	1	Unigene0028259(G6PD);Unigene0032642(YAB1)
GO:0016611	iron-iron nitrogenase complex	1	Unigene0006048(HCF101);Unigene0012786(MIND1)
GO:0016612	molybdenum-iron nitrogenase complex	1	Unigene0006048(HCF101);Unigene0012786(MIND1)
GO:0030428	cell septum	1	Unigene0001366(DDB_G0281937);Unigene0014432(AEL1)
GO:0036064	ciliary basal body	1	Unigene0022353(NEDD1);Unigene0028871(ssx2ip-a)
GO:0042763	intracellular immature spore	1	Unigene0025752(WAXY);Unigene0027846(RABA6A)
GO:0005874	microtubule	1	Unigene0000015(TUBB1);Unigene0000344(TUBB1);Unigene0000984(CCT4);Unigene0006020(KIN14I);Unigene0009344(KIN5B);Unigene0013385(CLASP);Unigene0013572(TUBA3);Unigene0015491(KIN12D);Unigene0015492(KIN12D);Unigene0015493(--);Unigene0022206(JGB);Unigene0022353(NEDD1);Unigene0023772(TUBB);Unigene0023776(TUBB1);Unigene0023777(TUBB1);Unigene0026114(CSI1);Unigene0026115(CSI1);Unigene0026855(SRR1);Unigene002…
GO:0009337	sulfite reductase complex (NADPH)	1	Unigene0010630(pKIWI502);Unigene0023783(Os07g0147900);Unigene0033207(PETH);Unigene0033208(PETH)
GO:0098799	outer mitochondrial membrane protein complex	1	Unigene0000090(TOM7-1);Unigene0000263(AUR3);Unigene0006512(TOM40-1);Unigene0031635(SAE2)
GO:0000151	ubiquitin ligase complex	1	Unigene0000901(Os04g0590900);Unigene0001371(BT3);Unigene0001406(WAV3);Unigene0001532(SIS3);Unigene0002072(ATL6);Unigene0002690(ATL46);Unigene0003091(WAVH1);Unigene0004134(ATL60);Unigene0004534(NIP2);Unigene0005072(WAV3);Unigene0005974(At1g55760);Unigene0006689(SGR9);Unigene0007714(SPA2);Unigene0008031(ATL65);Unigene0008553(ORTH2);Unigene0008615(RHA4A);Unigene0009020(ATL60);Unigene0009068(BRH1);Un…
GO:0000329	fungal-type vacuole membrane	1	Unigene0017944(FAB1A);Unigene0024444(HACD2);Unigene0030797(VATE);Unigene0031116(--);Unigene0031943(FAB1B)
GO:0000347	THO complex	1	Unigene0003298(MCM2);Unigene0013891(OsI_36121);Unigene0033898(At2g34460);Unigene0034338(MCM6);Unigene0034339(MCM6)
GO:0032838	cell projection cytoplasm	1	Unigene0016904(WAV2);Unigene0027296(--);Unigene0028091(DNAJB13);Unigene0028582(KIN8B);Unigene0031179(TPT);Unigene0032434(tif34)
GO:0045254	pyruvate dehydrogenase complex	1	Unigene0003368(At5g09300);Unigene0004784(EMB3003);Unigene0026216(BCCP1);Unigene0028847(At1g21400);Unigene0030692(Os07g0190000);Unigene0031815(Os07g0190000);Unigene0031878(TKL-2);Unigene0036509(TKT2)
GO:0000242	pericentriolar material	1	Unigene0022353(NEDD1)
GO:0000788	nuclear nucleosome	1	Unigene0000786(At1g07660)
GO:0001674	female germ cell nucleus	1	Unigene0028558(At5g14050)
GO:0001772	immunological synapse	1	Unigene0019619(ATL5)
GO:0005853	eukaryotic translation elongation factor 1 complex	1	Unigene0028565(Os07g0662500)
GO:0009531	secondary cell wall	1	Unigene0014502(NAC007)
GO:0009544	chloroplast ATP synthase complex	1	Unigene0009623(ATPC)
GO:0009551	secondary plasmodesma	1	Unigene0005615(CHER1)
GO:0019812	Type I site-specific deoxyribonuclease complex	1	Unigene0008535(GAD)
GO:0031205	endoplasmic reticulum Sec complex	1	Unigene0025515(BGLU40)
GO:0031257	cell trailing edge membrane	1	Unigene0027584(PTEN1)
GO:0031391	Elg1 RFC-like complex	1	Unigene0017575(RFC4)
GO:0031429	box H/ACA snoRNP complex	1	Unigene0001259(CBF5)
GO:0033391	chromatoid body	1	Unigene0025532(GCL1)
GO:0034245	mitochondrial DNA-directed RNA polymerase complex	1	Unigene0014841(RPOT1-TOM)
GO:0036266	Cdc48p-Npl4p-Vms1p AAA ATPase complex	1	Unigene0000263(AUR3)
GO:0043196	varicosity	1	Unigene0024982(PPC6-7)
GO:0043599	nuclear DNA replication factor C complex	1	Unigene0017575(RFC4)
GO:0071020	post-spliceosomal complex	1	Unigene0017590(OsI_27673)
GO:0071141	SMAD protein complex	1	Unigene0035825(SKIPA)
GO:0072588	box H/ACA RNP complex	1	Unigene0001259(CBF5)
GO:0097197	tetraspanin-enriched microdomain	1	Unigene0019619(ATL5)
GO:0097218	sieve plate	1	Unigene0005615(CHER1)
GO:0097504	Gemini of coiled bodies	1	Unigene0023856(Zpr1)
GO:0097574	lateral part of cell	1	Unigene0017058(KIN10)
GO:1990423	RZZ complex	1	Unigene0028997(--)
GO:0009317	acetyl-CoA carboxylase complex	1	Unigene0000129(CAC3);Unigene0003705(CARB);Unigene0003706(CARB);Unigene0021416(accD);Unigene0026216(BCCP1);Unigene0028309(POPTRDRAFT_831870)
GO:0019897	extrinsic component of plasma membrane	1	Unigene0002114(dnaJ);Unigene0005642(SYT3);Unigene0015369(XLG1);Unigene0027863(SYT3)
GO:0043189	H4/H2A histone acetyltransferase complex	1	Unigene0024453(ARP4);Unigene0030320(RHB1A);Unigene0031374(TAF14B)
GO:0005826	actomyosin contractile ring	1	Unigene0019131(JGB);Unigene0032677(JGB)
GO:0009320	phosphoribosylaminoimidazole carboxylase complex	1	Unigene0003706(CARB);Unigene0028309(POPTRDRAFT_831870)
GO:0016610	nitrogenase complex	1	Unigene0006048(HCF101);Unigene0012786(MIND1)
GO:0016613	vanadium-iron nitrogenase complex	1	Unigene0006048(HCF101);Unigene0012786(MIND1)
GO:0030076	light-harvesting complex	1	Unigene0011179(LHCB4.1);Unigene0034817(LHCB5)
GO:0031390	Ctf18 RFC-like complex	1	Unigene0017575(RFC4);Unigene0024510(DSCC1)
GO:0033116	endoplasmic reticulum-Golgi intermediate compartment membrane	1	Unigene0002637(PDCD2);Unigene0030385(SPPL1)
GO:0034707	chloride channel complex	1	Unigene0006412(CLC-A);Unigene0031808(CLC-C)
GO:0036126	sperm flagellum	1	Unigene0028091(DNAJB13);Unigene0031179(TPT)
GO:0042807	central vacuole	1	Unigene0003574(TIP1-1);Unigene0023396(TIP4-1)
GO:0044732	mitotic spindle pole body	1	Unigene0030636(EBP2);Unigene0032452(M3KE1)
GO:0031519	PcG protein complex	1	Unigene0004411(CLF);Unigene0022290(--);Unigene0033753(EZA1)
GO:0090406	pollen tube	1	Unigene0008297(RALFL19);Unigene0011111(USP);Unigene0030454(REN1)
GO:0000803	sex chromosome	1	Unigene0017058(KIN10);Unigene0022290(--)
GO:0005672	transcription factor TFIIA complex	1	Unigene0011370(RAX3);Unigene0013703(--)
GO:0005721	pericentric heterochromatin	1	Unigene0005601(DMT1);Unigene0005602(MET2)
GO:0005960	glycine cleavage complex	1	Unigene0002925(GDCST);Unigene0035413(GDH2)
GO:0032300	mismatch repair complex	1	Unigene0029061(MSH2);Unigene0035998(mutS2)
GO:0035032	phosphatidylinositol 3-kinase complex, class III	1	Unigene0017944(FAB1A);Unigene0031943(FAB1B)
GO:0043073	germ cell nucleus	1	Unigene0020735(KRP7);Unigene0028558(At5g14050)
GO:0043240	Fanconi anaemia nuclear complex	1	Unigene0004324(DI19-1);Unigene0010524(FANCM)
GO:1990023	mitotic spindle midzone	1	Unigene0028582(KIN8B);Unigene0031769(TRN1)
GO:0009360	DNA polymerase III complex	1	Unigene0002329(atad-3);Unigene0002674(At5g45720);Unigene0003967(CLPX1);Unigene0014416(At5g17760);Unigene0015470(NEN3);Unigene0016403(CDC48B);Unigene0017256(At5g17760);Unigene0017575(RFC4);Unigene0019997(At5g57480);Unigene0020043(R1A-10);Unigene0022480(STI);Unigene0032426(At4g18820);Unigene0032436(At4g18820);Unigene0032442(rexo4);Unigene0033846(At2g18193);Unigene0034547(--)
GO:0030286	dynein complex	1	Unigene0007584(dapb1);Unigene0012329(dlcB);Unigene0013806(RZFP34);Unigene0016141(--);Unigene0032946(ACO)
GO:0099512	supramolecular fiber	1	Unigene0000015(TUBB1);Unigene0000344(TUBB1);Unigene0000984(CCT4);Unigene0002114(dnaJ);Unigene0006020(KIN14I);Unigene0009344(KIN5B);Unigene0010862(At2g19810);Unigene0013385(CLASP);Unigene0013572(TUBA3);Unigene0015491(KIN12D);Unigene0015492(KIN12D);Unigene0015493(--);Unigene0020058(FIM5);Unigene0022206(JGB);Unigene0022353(NEDD1);Unigene0023524(--);Unigene0023772(TUBB);Unigene0023776(TUBB1);Unigene0…
GO:1990204	oxidoreductase complex	1	Unigene0000366(CHLP);Unigene0000625(ZDS);Unigene0001644(PSBQ2);Unigene0002594(P4H10);Unigene0002925(GDCST);Unigene0002998(UGT86A1);Unigene0003368(At5g09300);Unigene0003503(At2g24580);Unigene0003504(At2g24580);Unigene0004242(PPD2);Unigene0004784(EMB3003);Unigene0005805(--);Unigene0006048(HCF101);Unigene0007380(At1g12200);Unigene0007939(PAO2);Unigene0008362(PSB28);Unigene0011656(NTR1);Unigene001217…
GO:0001931	uropod	1	Unigene0027584(PTEN1)
GO:0002199	zona pellucida receptor complex	1	Unigene0000984(CCT4)
GO:0005790	smooth endoplasmic reticulum	1	Unigene0026653(Gba2)
GO:0005912	adherens junction	1	Unigene0028871(ssx2ip-a)
GO:0009569	chloroplast starch grain	1	Unigene0025752(WAXY)
GO:0010598	NAD(P)H dehydrogenase complex (plastoquinone)	1	Unigene0015815(ndhN)
GO:0016010	dystrophin-associated glycoprotein complex	1	Unigene0008274(At1g11330)
GO:0030289	protein phosphatase 4 complex	1	Unigene0029938(ESK1)
GO:0030892	mitotic cohesin complex	1	Unigene0015722(SMC4)
GO:0031254	cell trailing edge	1	Unigene0027584(PTEN1)
GO:0031389	Rad17 RFC-like complex	1	Unigene0017575(RFC4)
GO:0031417	NatC complex	1	Unigene0026499(ERF008)
GO:0031464	Cul4A-RING E3 ubiquitin ligase complex	1	Unigene0008553(ORTH2)
GO:0032044	DSIF complex	1	Unigene0026243(At5g63670)
GO:0032299	ribonuclease H2 complex	1	Unigene0029638(--)
GO:0033181	plasma membrane proton-transporting V-type ATPase complex	1	Unigene0030797(VATE)
GO:0033281	TAT protein transport complex	1	Unigene0000565(YMF16)
GO:0034388	Pwp2p-containing subcomplex of 90S preribosome	1	Unigene0028558(At5g14050)
GO:0034448	EGO complex	1	Unigene0001453(COR2)
GO:0034990	nuclear mitotic cohesin complex	1	Unigene0015722(SMC4)
GO:0035060	brahma complex	1	Unigene0024453(ARP4)
GO:0043036	starch grain	1	Unigene0025752(WAXY)
GO:0055038	recycling endosome membrane	1	Unigene0026689(--)
GO:0070161	anchoring junction	1	Unigene0028871(ssx2ip-a)
GO:0071561	nucleus-vacuole junction	1	Unigene0031116(--)
GO:0090665	glycoprotein complex	1	Unigene0008274(At1g11330)
GO:0097196	Shu complex	1	Unigene0024805(ZFP4)
GO:1990753	equatorial cell cortex	1	Unigene0027584(PTEN1)
GO:0000331	contractile vacuole	1	Unigene0026912(VHA-a3);Unigene0029361(VHA-a3);Unigene0030797(VATE)
GO:0005782	peroxisomal matrix	1	Unigene0004248(AAE3);Unigene0013235(MLS);Unigene0015469(URIII)
GO:0031234	extrinsic component of cytoplasmic side of plasma membrane	1	Unigene0005642(SYT3);Unigene0015369(XLG1);Unigene0027863(SYT3)
GO:0031261	DNA replication preinitiation complex	1	Unigene0008561(GINS1);Unigene0016526(DPB2);Unigene0031881(--)
GO:0031907	microbody lumen	1	Unigene0004248(AAE3);Unigene0013235(MLS);Unigene0015469(URIII)
GO:0030173	integral component of Golgi membrane	1	Unigene0008623(ATHB-54);Unigene0014626(UTR4);Unigene0016173(XLT2);Unigene0027070(QSOX1);Unigene0030122(ATHB-16)
GO:0044441	ciliary part	1	Unigene0022353(NEDD1);Unigene0027296(--);Unigene0028091(DNAJB13);Unigene0028582(KIN8B);Unigene0028871(ssx2ip-a);Unigene0031179(TPT);Unigene0032434(tif34)
GO:0005742	mitochondrial outer membrane translocase complex	1	Unigene0000090(TOM7-1);Unigene0031635(SAE2)
GO:0005942	phosphatidylinositol 3-kinase complex	1	Unigene0017944(FAB1A);Unigene0031943(FAB1B)
GO:0031298	replication fork protection complex	1	Unigene0008561(GINS1);Unigene0031881(--)
GO:0035267	NuA4 histone acetyltransferase complex	1	Unigene0024453(ARP4);Unigene0031374(TAF14B)
GO:0070938	contractile ring	1	Unigene0019131(JGB);Unigene0032677(JGB)
GO:1990752	microtubule end	1	Unigene0026114(CSI1);Unigene0026115(CSI1)
GO:0070382	exocytic vesicle	1	Unigene0001435(IREG2);Unigene0007124(LIP);Unigene0030454(REN1);Unigene0031246(FTIP3)
GO:0031967	organelle envelope	1	Unigene0000090(TOM7-1);Unigene0000263(AUR3);Unigene0000337(DVR);Unigene0000346(NUP98A);Unigene0000386(ICS2);Unigene0000400(PHYLLO);Unigene0000533(BASS1);Unigene0000565(YMF16);Unigene0000569(IPT5);Unigene0000659(PPT2);Unigene0000726(CRD1);Unigene0000817(PAP8);Unigene0000925(At3g55800);Unigene0000936(TIC20-V);Unigene0000947(CHLG);Unigene0000973(CURT1B);Unigene0001456(TIM8);Unigene0001497(PTAC16);Un…
GO:0032040	small-subunit processome	1	Unigene0013703(--);Unigene0014901(Nol6);Unigene0020295(HDT1);Unigene0027926(DIEXF);Unigene0028558(At5g14050);Unigene0029335(EMB2271);Unigene0029793(DIEXF);Unigene0029796(utp25);Unigene0035064(RPS7)
GO:0019898	extrinsic component of membrane	1	Unigene0001644(PSBQ2);Unigene0002114(dnaJ);Unigene0004242(PPD2);Unigene0004301(--);Unigene0005642(SYT3);Unigene0012008(--);Unigene0015369(XLG1);Unigene0017944(FAB1A);Unigene0025973(PPD7);Unigene0026592(PSBP);Unigene0027863(SYT3);Unigene0031106(At4g16563);Unigene0031943(FAB1B);Unigene0033304(PSBP1);Unigene0034555(At3g63540);Unigene0035540(PPD5)
GO:0030139	endocytic vesicle	1	Unigene0008045(DGD1);Unigene0008046(DGD1);Unigene0020143(At2g25060);Unigene0024997(DGD2);Unigene0026912(VHA-a3);Unigene0029361(VHA-a3);Unigene0030797(VATE);Unigene0032434(tif34)
GO:0005775	vacuolar lumen	1	Unigene0035645(NAPRT1);Unigene0035882(INV*DC4);Unigene0035883(INV*DC4)
GO:0009512	cytochrome b6f complex	1	Unigene0014956(PP2AB2);Unigene0024258(petM);Unigene0030810(petM)
GO:0016363	nuclear matrix	1	Unigene0009909(SRO5);Unigene0027508(SRO5);Unigene0035825(SKIPA)
GO:0001891	phagocytic cup	1	Unigene0030454(REN1)
GO:0005628	prospore membrane	1	Unigene0025752(WAXY)
GO:0005705	polytene chromosome interband	1	Unigene0026243(At5g63670)
GO:0031302	intrinsic component of endosome membrane	1	Unigene0003160(CML5)
GO:0031303	integral component of endosome membrane	1	Unigene0003160(CML5)
GO:0031414	N-terminal protein acetyltransferase complex	1	Unigene0026499(ERF008)
GO:0031934	mating-type region heterochromatin	1	Unigene0026243(At5g63670)
GO:0032797	SMN complex	1	Unigene0023856(Zpr1)
GO:0035145	exon-exon junction complex	1	Unigene0005870(At5g39865)
GO:0042764	ascospore-type prospore	1	Unigene0025752(WAXY)
GO:0043076	megasporocyte nucleus	1	Unigene0027659(ROS1)
GO:0043078	polar nucleus	1	Unigene0027659(ROS1)
GO:0044426	cell wall part	1	Unigene0005615(CHER1)
GO:0051285	cell cortex of cell tip	1	Unigene0027584(PTEN1)
GO:0017101	aminoacyl-tRNA synthetase multienzyme complex	1	Unigene0028186(TL17);Unigene0030293(MIEL1)
GO:0030670	phagocytic vesicle membrane	1	Unigene0026912(VHA-a3);Unigene0029361(VHA-a3)
GO:0030672	synaptic vesicle membrane	1	Unigene0007124(LIP);Unigene0031246(FTIP3)
GO:0031594	neuromuscular junction	1	Unigene0002114(dnaJ);Unigene0022368(JGB)
GO:0042645	mitochondrial nucleoid	1	Unigene0002114(dnaJ);Unigene0003324(--)
GO:0099501	exocytic vesicle membrane	1	Unigene0007124(LIP);Unigene0031246(FTIP3)
GO:0031228	intrinsic component of Golgi membrane	1	Unigene0008623(ATHB-54);Unigene0014626(UTR4);Unigene0016173(XLT2);Unigene0027070(QSOX1);Unigene0030122(ATHB-16)
GO:0005777	peroxisome	1	Unigene0000616(AAE17);Unigene0004248(AAE3);Unigene0005036(SOX);Unigene0009718(GLO5);Unigene0013235(MLS);Unigene0013282(PED1);Unigene0013983(4CLL9);Unigene0014532(RABC2A);Unigene0015286(PEX11C);Unigene0015469(URIII);Unigene0018264(GGAT1);Unigene0018595(NDKP1);Unigene0021227(AAE14);Unigene0025397(CYP76T24);Unigene0026465(HMGR2);Unigene0026720(PXN);Unigene0026721(PXN);Unigene0027819(OVA4);Unigene002…
GO:0042579	microbody	1	Unigene0000616(AAE17);Unigene0004248(AAE3);Unigene0005036(SOX);Unigene0009718(GLO5);Unigene0013235(MLS);Unigene0013282(PED1);Unigene0013983(4CLL9);Unigene0014532(RABC2A);Unigene0015286(PEX11C);Unigene0015469(URIII);Unigene0018264(GGAT1);Unigene0018595(NDKP1);Unigene0021227(AAE14);Unigene0025397(CYP76T24);Unigene0026465(HMGR2);Unigene0026720(PXN);Unigene0026721(PXN);Unigene0027819(OVA4);Unigene002…
GO:0009345	glycine-tRNA ligase complex	1	Unigene0032529(At1g29880);Unigene0032531(At1g29880);Unigene0035030(--)
GO:0098589	membrane region	1	Unigene0001435(IREG2);Unigene0002114(dnaJ);Unigene0002869(CNGC18);Unigene0008941(At1g25240);Unigene0011450(ROPGEF1);Unigene0012753(NCER1);Unigene0015613(ROPGEF14);Unigene0018888(At2g20760);Unigene0024083(PIN1A);Unigene0024982(PPC6-7);Unigene0026689(--);Unigene0027764(Os04g0679100);Unigene0030454(REN1);Unigene0030797(VATE);Unigene0031116(--);Unigene0036521(At4g40080)
GO:0000221	vacuolar proton-transporting V-type ATPase, V1 domain	1	Unigene0026114(CSI1);Unigene0026115(CSI1);Unigene0030778(Ipo5);Unigene0030797(VATE);Unigene0031116(--);Unigene0031117(--);Unigene0031930(CSI3);Unigene0033857(IMPA1)
GO:0042575	DNA polymerase complex	1	Unigene0002329(atad-3);Unigene0002674(At5g45720);Unigene0003967(CLPX1);Unigene0014416(At5g17760);Unigene0015470(NEN3);Unigene0016403(CDC48B);Unigene0016526(DPB2);Unigene0017256(At5g17760);Unigene0017575(RFC4);Unigene0019997(At5g57480);Unigene0020043(R1A-10);Unigene0022480(STI);Unigene0028929(--);Unigene0032426(At4g18820);Unigene0032436(At4g18820);Unigene0032442(rexo4);Unigene0033846(At2g18193);Un…
GO:0055037	recycling endosome	1	Unigene0001581(SHR);Unigene0007124(LIP);Unigene0019074(SHR);Unigene0026689(--);Unigene0031246(FTIP3)
GO:0005929	cilium	1	Unigene0000984(CCT4);Unigene0003243(--);Unigene0008792(KLCR2);Unigene0013149(MBP2C);Unigene0022353(NEDD1);Unigene0024106(--);Unigene0026884(--);Unigene0027296(--);Unigene0028091(DNAJB13);Unigene0028582(KIN8B);Unigene0028871(ssx2ip-a);Unigene0031179(TPT);Unigene0032434(tif34)
GO:0005882	intermediate filament	1	Unigene0010862(At2g19810);Unigene0023524(--)
GO:0005948	acetolactate synthase complex	1	Unigene0000400(PHYLLO);Unigene0003082(PDC1)
GO:0016323	basolateral plasma membrane	1	Unigene0001435(IREG2);Unigene0024083(PIN1A)
GO:0033644	host cell membrane	1	Unigene0003720(--);Unigene0030351(CER1)
GO:0044218	other organism cell membrane	1	Unigene0003720(--);Unigene0030351(CER1)
GO:0044279	other organism membrane	1	Unigene0003720(--);Unigene0030351(CER1)
GO:0005854	nascent polypeptide-associated complex	1	Unigene0004387(FKBP19);Unigene0006050(TIG);Unigene0027641(At3g49470)
GO:0034702	ion channel complex	1	Unigene0006412(CLC-A);Unigene0029244(TIC100);Unigene0031808(CLC-C)
GO:0051233	spindle midzone	1	Unigene0017943(Cenpv);Unigene0028582(KIN8B);Unigene0031769(TRN1)
GO:0097223	sperm part	1	Unigene0024303(PPCK2);Unigene0028091(DNAJB13);Unigene0031179(TPT)
GO:0009379	Holliday junction helicase complex	1	Unigene0002329(atad-3);Unigene0002674(At5g45720);Unigene0003967(CLPX1);Unigene0004461(FIGL1);Unigene0013492(R1A-10);Unigene0014416(At5g17760);Unigene0016403(CDC48B);Unigene0017256(At5g17760);Unigene0018111(FTSH12);Unigene0018791(LON2);Unigene0019997(At5g57480);Unigene0023607(ABCG39);Unigene0023849(AATP1);Unigene0025228(FTSHI2);Unigene0025257(spast);Unigene0029289(R1B-16);Unigene0032147(ycf45);Uni…
GO:0005666	DNA-directed RNA polymerase III complex	1	Unigene0003007(--);Unigene0016283(--);Unigene0018057(AAPT1);Unigene0028711(polr1c);Unigene0029392(--)
GO:0030863	cortical cytoskeleton	1	Unigene0019131(JGB);Unigene0026114(CSI1);Unigene0026115(CSI1);Unigene0032677(JGB);Unigene0033923(AIR9)
GO:0000439	core TFIIH complex	1	Unigene0035399(TFB4)
GO:0000815	ESCRT III complex	1	Unigene0013510(VPS2.2)
GO:0001673	male germ cell nucleus	1	Unigene0020735(KRP7)
GO:0005652	nuclear lamina	1	Unigene0023670(RRP4)
GO:0005703	polytene chromosome puff	1	Unigene0026243(At5g63670)
GO:0005724	nuclear telomeric heterochromatin	1	Unigene0026243(At5g63670)
GO:0005814	centriole	1	Unigene0022353(NEDD1)
GO:0009322	trimethylamine-N-oxide reductase complex	1	Unigene0028520(At2g14510)
GO:0016328	lateral plasma membrane	1	Unigene0027501(NIP3-1)
GO:0030915	Smc5-Smc6 complex	1	Unigene0034599(SNI1)
GO:0031082	BLOC complex	1	Unigene0032572(LNG1)
GO:0031083	BLOC-1 complex	1	Unigene0032572(LNG1)
GO:0031933	telomeric heterochromatin	1	Unigene0026243(At5g63670)
GO:0033553	rDNA heterochromatin	1	Unigene0026243(At5g63670)
GO:0043625	delta DNA polymerase complex	1	Unigene0028929(--)
GO:0044304	main axon	1	Unigene0024982(PPC6-7)
GO:0044614	nuclear pore cytoplasmic filaments	1	Unigene0000346(NUP98A)
GO:0044615	nuclear pore nuclear basket	1	Unigene0000346(NUP98A)
GO:0071203	WASH complex	1	Unigene0032777(CHLD)
GO:0005732	small nucleolar ribonucleoprotein complex	1	Unigene0001210(naf1);Unigene0001259(CBF5);Unigene0029335(EMB2271)
GO:0005787	signal peptidase complex	1	Unigene0000946(--);Unigene0008804(DTM1);Unigene0024910(TRE1)
GO:0045211	postsynaptic membrane	1	Unigene0002114(dnaJ);Unigene0024982(PPC6-7);Unigene0026689(--)
GO:0045252	oxoglutarate dehydrogenase complex	1	Unigene0003368(At5g09300);Unigene0004784(EMB3003);Unigene0026216(BCCP1)
GO:0097060	synaptic membrane	1	Unigene0002114(dnaJ);Unigene0024982(PPC6-7);Unigene0026689(--)
GO:0098791	Golgi subcompartment	1	Unigene0001105(TPST);Unigene0001551(CSLC5);Unigene0001772(DIM);Unigene0001911(At4g00750);Unigene0002696(CSLA2);Unigene0002985(GATL7);Unigene0004478(RAN1);Unigene0004497(RLP4);Unigene0004692(At5g03700);Unigene0004965(LYPLA1);Unigene0005615(CHER1);Unigene0006069(GATL8);Unigene0006070(GATL8);Unigene0006581(At2g32450);Unigene0006658(TMN2);Unigene0010830(GATL3);Unigene0011982(CSLA9);Unigene0012121(TSP…
GO:0098554	cytoplasmic side of endoplasmic reticulum membrane	1	Unigene0019974(RPS28);Unigene0030385(SPPL1)
GO:0031975	envelope	1	Unigene0000090(TOM7-1);Unigene0000263(AUR3);Unigene0000337(DVR);Unigene0000346(NUP98A);Unigene0000386(ICS2);Unigene0000400(PHYLLO);Unigene0000533(BASS1);Unigene0000565(YMF16);Unigene0000569(IPT5);Unigene0000659(PPT2);Unigene0000726(CRD1);Unigene0000817(PAP8);Unigene0000925(At3g55800);Unigene0000936(TIC20-V);Unigene0000944(--);Unigene0000947(CHLG);Unigene0000973(CURT1B);Unigene0001456(TIM8);Unigen…
GO:0000311	plastid large ribosomal subunit	1	Unigene0003258(RPL9);Unigene0004021(RPL21);Unigene0007891(DCR);Unigene0025023(RPL17B);Unigene0025402(RPL10A);Unigene0028026(RPL28)
GO:0018995	host	1	Unigene0003720(--);Unigene0021655(At3g43660);Unigene0029546(--);Unigene0030351(CER1);Unigene0031532(PCAP1);Unigene0033125(--)
GO:0031514	motile cilium	1	Unigene0003243(--);Unigene0013149(MBP2C);Unigene0024106(--);Unigene0026884(--);Unigene0028091(DNAJB13);Unigene0031179(TPT)
GO:0043657	host cell	1	Unigene0003720(--);Unigene0021655(At3g43660);Unigene0029546(--);Unigene0030351(CER1);Unigene0031532(PCAP1);Unigene0033125(--)
GO:0044215	other organism	1	Unigene0003720(--);Unigene0021655(At3g43660);Unigene0029546(--);Unigene0030351(CER1);Unigene0031532(PCAP1);Unigene0033125(--)
GO:0044216	other organism cell	1	Unigene0003720(--);Unigene0021655(At3g43660);Unigene0029546(--);Unigene0030351(CER1);Unigene0031532(PCAP1);Unigene0033125(--)
GO:0044217	other organism part	1	Unigene0003720(--);Unigene0021655(At3g43660);Unigene0029546(--);Unigene0030351(CER1);Unigene0031532(PCAP1);Unigene0033125(--)
GO:0033180	proton-transporting V-type ATPase, V1 domain	1	Unigene0026114(CSI1);Unigene0026115(CSI1);Unigene0026328(--);Unigene0030778(Ipo5);Unigene0030797(VATE);Unigene0031116(--);Unigene0031117(--);Unigene0031930(CSI3);Unigene0033857(IMPA1)
GO:0034399	nuclear periphery	1	Unigene0000346(NUP98A);Unigene0009909(SRO5);Unigene0023670(RRP4);Unigene0027508(SRO5);Unigene0027820(--);Unigene0030636(EBP2);Unigene0031390(THY-1);Unigene0031769(TRN1);Unigene0035825(SKIPA)
GO:0008287	protein serine/threonine phosphatase complex	1	Unigene0014956(PP2AB2);Unigene0016464(CBL7);Unigene0029938(ESK1);Unigene0033867(B'ETA)
GO:1903293	phosphatase complex	1	Unigene0014956(PP2AB2);Unigene0016464(CBL7);Unigene0029938(ESK1);Unigene0033867(B'ETA)
GO:0008021	synaptic vesicle	1	Unigene0001435(IREG2);Unigene0007124(LIP);Unigene0031246(FTIP3)
GO:0044450	microtubule organizing center part	1	Unigene0022206(JGB);Unigene0022353(NEDD1);Unigene0028871(ssx2ip-a)
GO:0045240	dihydrolipoyl dehydrogenase complex	1	Unigene0003368(At5g09300);Unigene0004784(EMB3003);Unigene0026216(BCCP1)
GO:0045335	phagocytic vesicle	1	Unigene0026912(VHA-a3);Unigene0029361(VHA-a3);Unigene0032434(tif34)
GO:0000419	DNA-directed RNA polymerase V complex	1	Unigene0016283(--)
GO:0000796	condensin complex	1	Unigene0015722(SMC4)
GO:0000799	nuclear condensin complex	1	Unigene0015722(SMC4)
GO:0000812	Swr1 complex	1	Unigene0031374(TAF14B)
GO:0005663	DNA replication factor C complex	1	Unigene0017575(RFC4)
GO:0005832	chaperonin-containing T-complex	1	Unigene0000984(CCT4)
GO:0009340	DNA topoisomerase IV complex	1	Unigene0031782(GYRB)
GO:0009574	preprophase band	1	Unigene0033923(AIR9)
GO:0016442	RISC complex	1	Unigene0011830(DCL4)
GO:0031080	nuclear pore outer ring	1	Unigene0000346(NUP98A)
GO:0031332	RNAi effector complex	1	Unigene0011830(DCL4)
GO:0035578	azurophil granule lumen	1	Unigene0035645(NAPRT1)
GO:0042406	extrinsic component of endoplasmic reticulum membrane	1	Unigene0004301(--)
GO:0030257	type III protein secretion system complex	1	Unigene0003120(CAX3);Unigene0016742(VHA-B2);Unigene0019459(JGB);Unigene0023063(ATPG);Unigene0023474(CVA69.24);Unigene0023607(ABCG39);Unigene0035538(ABCC10)
GO:0048476	Holliday junction resolvase complex	1	Unigene0002329(atad-3);Unigene0002674(At5g45720);Unigene0003967(CLPX1);Unigene0004461(FIGL1);Unigene0013492(R1A-10);Unigene0014416(At5g17760);Unigene0016403(CDC48B);Unigene0017256(At5g17760);Unigene0018111(FTSH12);Unigene0018791(LON2);Unigene0019997(At5g57480);Unigene0023607(ABCG39);Unigene0023849(AATP1);Unigene0025228(FTSHI2);Unigene0025257(spast);Unigene0029289(R1B-16);Unigene0032147(ycf45);Uni…
GO:0019013	viral nucleocapsid	1	Unigene0003382(BRN1);Unigene0022224(PU1)
GO:0005789	endoplasmic reticulum membrane	1	Unigene0000263(AUR3);Unigene0000494(--);Unigene0000946(--);Unigene0001772(DIM);Unigene0002637(PDCD2);Unigene0004028(SEI1);Unigene0004301(--);Unigene0005128(ECR);Unigene0005642(SYT3);Unigene0005978(GLO1);Unigene0005979(GLO2);Unigene0006188(LPR1);Unigene0007124(LIP);Unigene0008339(CYP92C6);Unigene0008804(DTM1);Unigene0009085(KAT2);Unigene0011027(PILS7);Unigene0011453(CYP75B2);Unigene0011512(LCA1);U…
GO:0005720	nuclear heterochromatin	1	Unigene0008553(ORTH2);Unigene0017976(ORTH2);Unigene0017978(ORTH2);Unigene0026243(At5g63670)
GO:0071821	FANCM-MHF complex	1	Unigene0000786(At1g07660);Unigene0002792(NEK6);Unigene0010172(HTR2);Unigene0010524(FANCM)
GO:0005811	lipid particle	1	Unigene0012733(MATP6-A);Unigene0014840(PUX8);Unigene0026184(SRP);Unigene0027186(SMT1);Unigene0030737(PLSC);Unigene0031129(At4g25140)
GO:0031012	extracellular matrix	1	Unigene0001057(3MMP);Unigene0014381(1MMP);Unigene0022972(ARPN)
GO:0031230	intrinsic component of cell outer membrane	1	Unigene0000944(--);Unigene0002218(BHLH147);Unigene0003560(EMB1417);Unigene0006581(At2g32450);Unigene0018219(SG1);Unigene0029837(HCF107);Unigene0030576(sti1);Unigene0031171(MRL1);Unigene0034154(EMB2076)
GO:0045203	integral component of cell outer membrane	1	Unigene0000944(--);Unigene0002218(BHLH147);Unigene0003560(EMB1417);Unigene0006581(At2g32450);Unigene0018219(SG1);Unigene0029837(HCF107);Unigene0030576(sti1);Unigene0031171(MRL1);Unigene0034154(EMB2076)
GO:0033202	DNA helicase complex	1	Unigene0002329(atad-3);Unigene0002674(At5g45720);Unigene0003967(CLPX1);Unigene0004461(FIGL1);Unigene0013492(R1A-10);Unigene0014416(At5g17760);Unigene0016403(CDC48B);Unigene0017256(At5g17760);Unigene0018111(FTSH12);Unigene0018791(LON2);Unigene0019997(At5g57480);Unigene0023607(ABCG39);Unigene0023849(AATP1);Unigene0025228(FTSHI2);Unigene0025257(spast);Unigene0029289(R1B-16);Unigene0032147(ycf45);Uni…
GO:0009539	photosystem II reaction center	1	Unigene0007167(ASA1);Unigene0036332(IAA12)
GO:0042025	host cell nucleus	1	Unigene0021655(At3g43660);Unigene0033125(--)
GO:0005834	heterotrimeric G-protein complex	1	Unigene0015369(XLG1)
GO:0008290	F-actin capping protein complex	1	Unigene0034607(--)
GO:0009277	fungal-type cell wall	1	Unigene0025752(WAXY)
GO:0014069	postsynaptic density	1	Unigene0026689(--)
GO:0015627	type II protein secretion system complex	1	Unigene0028411(CER3)
GO:0016586	RSC complex	1	Unigene0024453(ARP4)
GO:0019774	proteasome core complex, beta-subunit complex	1	Unigene0033952(BBR)
GO:0030426	growth cone	1	Unigene0023856(Zpr1)
GO:0030897	HOPS complex	1	Unigene0025739(VAMP713)
GO:0031515	tRNA (m1A) methyltransferase complex	1	Unigene0017199(PIMT1)
GO:0032279	asymmetric synapse	1	Unigene0026689(--)
GO:0042405	nuclear inclusion body	1	Unigene0000346(NUP98A)
GO:0042788	polysomal ribosome	1	Unigene0019974(RPS28)
GO:0061617	MICOS complex	1	Unigene0030867(rnf170)
GO:0071556	integral component of lumenal side of endoplasmic reticulum membrane	1	Unigene0030385(SPPL1)
GO:0098553	lumenal side of endoplasmic reticulum membrane	1	Unigene0030385(SPPL1)
GO:0099572	postsynaptic specialization	1	Unigene0026689(--)
GO:1990071	TRAPPII protein complex	1	Unigene0004712(CBP60B)
GO:0044423	virion part	1	Unigene0000707(PCMP-H24);Unigene0000816(UGT29);Unigene0003382(BRN1);Unigene0003918(LECRKS7);Unigene0007412(CPRD49);Unigene0010019(GF14D);Unigene0010975(--);Unigene0011108(At1g18000);Unigene0012248(PMEU1);Unigene0017797(KIP1);Unigene0018622(--);Unigene0021489(apoeb);Unigene0022050(HSP70);Unigene0022224(PU1);Unigene0024787(--);Unigene0026338(GBF);Unigene0027160(PHS2);Unigene0027204(At3g55350);Unige…
GO:1902554	serine/threonine protein kinase complex	1	Unigene0008176(At4g30825);Unigene0011581(CYCT1-1);Unigene0017058(KIN10);Unigene0021457(CDKB1-2)
GO:0031304	intrinsic component of mitochondrial inner membrane	1	Unigene0025666(At5g48970);Unigene0030867(rnf170);Unigene0033742(TIM23-1)
GO:0031305	integral component of mitochondrial inner membrane	1	Unigene0025666(At5g48970);Unigene0030867(rnf170);Unigene0033742(TIM23-1)
GO:0032155	cell division site part	1	Unigene0019131(JGB);Unigene0027584(PTEN1);Unigene0032677(JGB)
GO:1902562	H4 histone acetyltransferase complex	1	Unigene0024453(ARP4);Unigene0030320(RHB1A);Unigene0031374(TAF14B)
GO:0000323	lytic vacuole	1	Unigene0002859(BACOVA_02659);Unigene0006494(--);Unigene0009029(At5g66150);Unigene0009773(CATHB2);Unigene0014124(BACOVA_02659);Unigene0015655(PRCP);Unigene0016904(WAV2);Unigene0017058(KIN10);Unigene0017944(FAB1A);Unigene0024444(HACD2);Unigene0026912(VHA-a3);Unigene0027194(At2g16790);Unigene0029361(VHA-a3);Unigene0030385(SPPL1);Unigene0030797(VATE);Unigene0031116(--);Unigene0031943(FAB1B);Unigene00…
GO:0042175	nuclear outer membrane-endoplasmic reticulum membrane network	1	Unigene0000263(AUR3);Unigene0000494(--);Unigene0000946(--);Unigene0001772(DIM);Unigene0002637(PDCD2);Unigene0004028(SEI1);Unigene0004301(--);Unigene0005128(ECR);Unigene0005642(SYT3);Unigene0005978(GLO1);Unigene0005979(GLO2);Unigene0006188(LPR1);Unigene0007124(LIP);Unigene0008339(CYP92C6);Unigene0008804(DTM1);Unigene0009085(KAT2);Unigene0011027(PILS7);Unigene0011453(CYP75B2);Unigene0011512(LCA1);U…
GO:0043025	neuronal cell body	1	Unigene0000813(ncdn);Unigene0001904(OsI_16936);Unigene0005601(DMT1);Unigene0005602(MET2);Unigene0023856(Zpr1)
GO:0044437	vacuolar part	1	Unigene0000786(At1g07660);Unigene0001434(MOT2);Unigene0001453(COR2);Unigene0001771(DIM);Unigene0001772(DIM);Unigene0003574(TIP1-1);Unigene0003594(MTP9);Unigene0003716(VHA-c''1);Unigene0004841(BXL6);Unigene0004920(VATP-P1);Unigene0004922(VATP-P1);Unigene0004957(HMA4);Unigene0005615(CHER1);Unigene0006412(CLC-A);Unigene0006494(--);Unigene0006647(COPT5.1);Unigene0008842(UGT80B1);Unigene0009423(OCT1);…
GO:0032580	Golgi cisterna membrane	1	Unigene0014313(GAE6);Unigene0016008(GAE4);Unigene0016173(XLT2);Unigene0022977(FT1)
GO:0005677	chromatin silencing complex	1	Unigene0004411(CLF);Unigene0033753(EZA1)
GO:0005816	spindle pole body	1	Unigene0030636(EBP2);Unigene0032452(M3KE1)
GO:0033647	host intracellular organelle	1	Unigene0021655(At3g43660);Unigene0033125(--)
GO:0033648	host intracellular membrane-bounded organelle	1	Unigene0021655(At3g43660);Unigene0033125(--)
GO:0031968	organelle outer membrane	1	Unigene0000090(TOM7-1);Unigene0000263(AUR3);Unigene0000386(ICS2);Unigene0005332(BHLH68);Unigene0005839(HXK1);Unigene0006512(TOM40-1);Unigene0008045(DGD1);Unigene0008046(DGD1);Unigene0009226(qtrt1);Unigene0009836(CB5-A);Unigene0018816(--);Unigene0019984(KO);Unigene0021296(MYC2);Unigene0024997(DGD2);Unigene0026393(BHLH112);Unigene0028902(BHLH68);Unigene0029833(THF1);Unigene0031635(SAE2);Unigene0033…
GO:0009279	cell outer membrane	1	Unigene0000944(--);Unigene0002218(BHLH147);Unigene0003560(EMB1417);Unigene0006581(At2g32450);Unigene0013279(JGB);Unigene0018219(SG1);Unigene0024992(MYB73);Unigene0029837(HCF107);Unigene0029885(pvadh);Unigene0030569(TIL);Unigene0030576(sti1);Unigene0031171(MRL1);Unigene0034154(EMB2076)
GO:0005774	vacuolar membrane	1	Unigene0000786(At1g07660);Unigene0001434(MOT2);Unigene0001453(COR2);Unigene0001771(DIM);Unigene0001772(DIM);Unigene0003574(TIP1-1);Unigene0003594(MTP9);Unigene0003716(VHA-c''1);Unigene0004841(BXL6);Unigene0004920(VATP-P1);Unigene0004922(VATP-P1);Unigene0004957(HMA4);Unigene0005615(CHER1);Unigene0006412(CLC-A);Unigene0006494(--);Unigene0006647(COPT5.1);Unigene0008842(UGT80B1);Unigene0009423(OCT1);…
GO:0033179	proton-transporting V-type ATPase, V0 domain	1	Unigene0003716(VHA-c''1);Unigene0026912(VHA-a3);Unigene0029361(VHA-a3)
GO:0000813	ESCRT I complex	1	Unigene0026796(dhmA)
GO:0002178	palmitoyltransferase complex	1	Unigene0015282(LCB2a)
GO:0005845	mRNA cap binding complex	1	Unigene0032983(ERF12)
GO:0005935	cellular bud neck	1	Unigene0031769(TRN1)
GO:0005971	ribonucleoside-diphosphate reductase complex	1	Unigene0013038(RNR1)
GO:0008541	proteasome regulatory particle, lid subcomplex	1	Unigene0014077(UGT90A1)
GO:0017059	serine C-palmitoyltransferase complex	1	Unigene0015282(LCB2a)
GO:0031211	endoplasmic reticulum palmitoyltransferase complex	1	Unigene0015282(LCB2a)
GO:0035339	SPOTS complex	1	Unigene0015282(LCB2a)
GO:0060076	excitatory synapse	1	Unigene0026689(--)
GO:0098576	lumenal side of membrane	1	Unigene0030385(SPPL1)
GO:0044297	cell body	1	Unigene0000813(ncdn);Unigene0000984(CCT4);Unigene0001904(OsI_16936);Unigene0005601(DMT1);Unigene0005602(MET2);Unigene0023856(Zpr1)
GO:0098827	endoplasmic reticulum subcompartment	1	Unigene0000263(AUR3);Unigene0001772(DIM);Unigene0002637(PDCD2);Unigene0004028(SEI1);Unigene0004301(--);Unigene0005128(ECR);Unigene0005642(SYT3);Unigene0006188(LPR1);Unigene0007124(LIP);Unigene0008339(CYP92C6);Unigene0011453(CYP75B2);Unigene0011512(LCA1);Unigene0012121(TSPO);Unigene0012753(NCER1);Unigene0014127(At1g16220);Unigene0014128(Os08g0500300);Unigene0014236(CUT1);Unigene0014479(GATL1);Unig…
GO:0016471	vacuolar proton-transporting V-type ATPase complex	1	Unigene0003716(VHA-c''1);Unigene0004920(VATP-P1);Unigene0004922(VATP-P1);Unigene0016742(VHA-B2);Unigene0023472(CVA69.24);Unigene0023474(CVA69.24);Unigene0026114(CSI1);Unigene0026115(CSI1);Unigene0026912(VHA-a3);Unigene0029361(VHA-a3);Unigene0030778(Ipo5);Unigene0030797(VATE);Unigene0031116(--);Unigene0031117(--);Unigene0031930(CSI3);Unigene0033857(IMPA1)
GO:0098797	plasma membrane protein complex	1	Unigene0000283(ABCG18);Unigene0000445(ABCG11);Unigene0000565(YMF16);Unigene0000781(ABCG32);Unigene0000806(IPT1);Unigene0000849(ABCB4);Unigene0001644(PSBQ2);Unigene0002164(At1g76070);Unigene0003967(CLPX1);Unigene0004006(CALS5);Unigene0005148(ABCG15);Unigene0006575(ABCG11);Unigene0007936(ABCG11);Unigene0008144(IPT1);Unigene0008246(ABCG36);Unigene0008248(PDR1);Unigene0008274(At1g11330);Unigene000962…
GO:0000159	protein phosphatase type 2A complex	1	Unigene0014956(PP2AB2);Unigene0033867(B'ETA)
GO:0005793	endoplasmic reticulum-Golgi intermediate compartment	1	Unigene0002637(PDCD2);Unigene0030385(SPPL1)
GO:0030123	AP-3 adaptor complex	1	Unigene0030219(--);Unigene0031743(UBC10)
GO:0045111	intermediate filament cytoskeleton	1	Unigene0010862(At2g19810);Unigene0023524(--)
GO:0000792	heterochromatin	1	Unigene0005601(DMT1);Unigene0005602(MET2);Unigene0008553(ORTH2);Unigene0017976(ORTH2);Unigene0017978(ORTH2);Unigene0026243(At5g63670)
GO:0033104	type VI protein secretion system complex	1	Unigene0003967(CLPX1);Unigene0007078(SMXL3);Unigene0018791(LON2);Unigene0028268(--);Unigene0032719(CD4B)
GO:0005905	coated pit	1	Unigene0008941(At1g25240);Unigene0018888(At2g20760);Unigene0027764(Os04g0679100);Unigene0036521(At4g40080)
GO:1902911	protein kinase complex	1	Unigene0008176(At4g30825);Unigene0011581(CYCT1-1);Unigene0017058(KIN10);Unigene0021457(CDKB1-2)
GO:0000798	nuclear cohesin complex	1	Unigene0015722(SMC4)
GO:0005933	cellular bud	1	Unigene0031769(TRN1)
GO:0008622	epsilon DNA polymerase complex	1	Unigene0016526(DPB2)
GO:0009325	nitrate reductase complex	1	Unigene0032875(ALE2)
GO:0034703	cation channel complex	1	Unigene0029244(TIC100)
GO:0036513	Derlin-1 retrotranslocation complex	1	Unigene0031552(RMA3)
GO:0043197	dendritic spine	1	Unigene0026689(--)
GO:0043204	perikaryon	1	Unigene0023856(Zpr1)
GO:0044309	neuron spine	1	Unigene0026689(--)
GO:0045121	membrane raft	1	Unigene0031116(--)
GO:0071012	catalytic step 1 spliceosome	1	Unigene0024296(syf1)
GO:0090543	Flemming body	1	Unigene0033617(EXO70B1)
GO:0098857	membrane microdomain	1	Unigene0031116(--)
GO:0099738	cell cortex region	1	Unigene0027584(PTEN1)
GO:0044432	endoplasmic reticulum part	1	Unigene0000263(AUR3);Unigene0000494(--);Unigene0000946(--);Unigene0001772(DIM);Unigene0002088(ERDJ3A);Unigene0002594(P4H10);Unigene0002637(PDCD2);Unigene0004028(SEI1);Unigene0004301(--);Unigene0005128(ECR);Unigene0005642(SYT3);Unigene0005978(GLO1);Unigene0005979(GLO2);Unigene0006188(LPR1);Unigene0006512(TOM40-1);Unigene0007124(LIP);Unigene0008339(CYP92C6);Unigene0008804(DTM1);Unigene0009085(KAT2)…
GO:0000942	condensed nuclear chromosome outer kinetochore	1	Unigene0015026(ZAT9);Unigene0024106(--);Unigene0036045(EFTS)
GO:0042729	DASH complex	1	Unigene0015026(ZAT9);Unigene0024106(--);Unigene0036045(EFTS)
GO:0005940	septin ring	1	Unigene0023142(KIP1);Unigene0024106(--)
GO:0098852	lytic vacuole membrane	1	Unigene0006494(--);Unigene0017944(FAB1A);Unigene0024444(HACD2);Unigene0026912(VHA-a3);Unigene0029361(VHA-a3);Unigene0030385(SPPL1);Unigene0030797(VATE);Unigene0031116(--);Unigene0031943(FAB1B);Unigene0032507(NPC1)
GO:0031201	SNARE complex	1	Unigene0016879(VAMP721);Unigene0020969(SYP125);Unigene0025739(VAMP713);Unigene0033005(VAMP724)
GO:0033643	host cell part	1	Unigene0003720(--);Unigene0021655(At3g43660);Unigene0030351(CER1);Unigene0033125(--)
GO:0019028	viral capsid	1	Unigene0000816(UGT29);Unigene0003382(BRN1);Unigene0007412(CPRD49);Unigene0010019(GF14D);Unigene0011108(At1g18000);Unigene0012248(PMEU1);Unigene0017797(KIP1);Unigene0021489(apoeb);Unigene0022050(HSP70);Unigene0022224(PU1);Unigene0026338(GBF);Unigene0033667(MRS2-I)
GO:0009524	phragmoplast	1	Unigene0005615(CHER1);Unigene0012286(SKP1A);Unigene0013385(CLASP);Unigene0016403(CDC48B);Unigene0022353(NEDD1);Unigene0033124(MAP65-8);Unigene0033923(AIR9)
GO:0032153	cell division site	1	Unigene0019131(JGB);Unigene0027584(PTEN1);Unigene0032677(JGB)
GO:0009504	cell plate	1	Unigene0032141(RABA3)
GO:0016234	inclusion body	1	Unigene0000346(NUP98A)
GO:0034518	RNA cap binding complex	1	Unigene0032983(ERF12)
GO:0042765	GPI-anchor transamidase complex	1	Unigene0031133(GLDP1)
GO:0071458	integral component of cytoplasmic side of endoplasmic reticulum membrane	1	Unigene0030385(SPPL1)
GO:0000974	Prp19 complex	1	Unigene0024296(syf1);Unigene0035825(SKIPA)
GO:0009338	exodeoxyribonuclease V complex	1	Unigene0020963(R1B-12);Unigene0026855(SRR1)
GO:0030864	cortical actin cytoskeleton	1	Unigene0019131(JGB);Unigene0032677(JGB)
GO:0032156	septin cytoskeleton	1	Unigene0023142(KIP1);Unigene0024106(--)
GO:0036452	ESCRT complex	1	Unigene0013510(VPS2.2);Unigene0026796(dhmA)
GO:0005875	microtubule associated complex	1	Unigene0006020(KIN14I);Unigene0007584(dapb1);Unigene0008683(--);Unigene0009344(KIN5B);Unigene0012329(dlcB);Unigene0013806(RZFP34);Unigene0015163(--);Unigene0015164(--);Unigene0016141(--);Unigene0022206(JGB);Unigene0028582(KIN8B);Unigene0032946(ACO);Unigene0033118(IQD31)
GO:0044462	external encapsulating structure part	1	Unigene0000944(--);Unigene0002218(BHLH147);Unigene0003560(EMB1417);Unigene0005615(CHER1);Unigene0006581(At2g32450);Unigene0013279(JGB);Unigene0018219(SG1);Unigene0024992(MYB73);Unigene0029837(HCF107);Unigene0029885(pvadh);Unigene0030569(TIL);Unigene0030576(sti1);Unigene0031171(MRL1);Unigene0034154(EMB2076)
GO:0031965	nuclear membrane	1	Unigene0000346(NUP98A);Unigene0000569(IPT5);Unigene0014347(IPT5);Unigene0014570(SUN2);Unigene0017058(KIN10);Unigene0017575(RFC4);Unigene0025445(CNGC15C);Unigene0028558(At5g14050);Unigene0031769(TRN1)
GO:0019867	outer membrane	1	Unigene0000090(TOM7-1);Unigene0000263(AUR3);Unigene0000386(ICS2);Unigene0000944(--);Unigene0002218(BHLH147);Unigene0003560(EMB1417);Unigene0005332(BHLH68);Unigene0005839(HXK1);Unigene0006512(TOM40-1);Unigene0006581(At2g32450);Unigene0007288(ICR2);Unigene0008045(DGD1);Unigene0008046(DGD1);Unigene0008669(LPA1);Unigene0009226(qtrt1);Unigene0009836(CB5-A);Unigene0013279(JGB);Unigene0018219(SG1);Unige…
GO:0009986	cell surface	1	Unigene0000445(ABCG11);Unigene0004789(PHOT1);Unigene0007936(ABCG11);Unigene0016431(--);Unigene0017358(At5g58300);Unigene0018283(FER);Unigene0019190(PRK3);Unigene0031285(At1g56130)
GO:0030288	outer membrane-bounded periplasmic space	1	Unigene0009820(PHB1);Unigene0010051(ARASP);Unigene0015248(--);Unigene0021750(CTPA2);Unigene0023729(DEGP10);Unigene0025481(CTPA3);Unigene0032602(DEGP2);Unigene0035315(--)
GO:0005658	alpha DNA polymerase:primase complex	1	Unigene0000962(EIF4A1);Unigene0003318(POLA);Unigene0011830(DCL4);Unigene0021610(At1g67320);Unigene0031916(RH3)
GO:0000139	Golgi membrane	1	Unigene0001105(TPST);Unigene0001551(CSLC5);Unigene0001772(DIM);Unigene0001911(At4g00750);Unigene0002637(PDCD2);Unigene0002696(CSLA2);Unigene0002985(GATL7);Unigene0005615(CHER1);Unigene0006069(GATL8);Unigene0006070(GATL8);Unigene0006658(TMN2);Unigene0008623(ATHB-54);Unigene0010830(GATL3);Unigene0011982(CSLA9);Unigene0012121(TSPO);Unigene0012589(GUX2);Unigene0012753(NCER1);Unigene0014313(GAE6);Unig…
GO:0000940	condensed chromosome outer kinetochore	1	Unigene0015026(ZAT9);Unigene0024106(--);Unigene0036045(EFTS)
GO:0005876	spindle microtubule	1	Unigene0013385(CLASP);Unigene0022353(NEDD1);Unigene0028582(KIN8B)
GO:0036477	somatodendritic compartment	1	Unigene0000263(AUR3);Unigene0000813(ncdn);Unigene0001904(OsI_16936);Unigene0005601(DMT1);Unigene0005602(MET2);Unigene0016904(WAV2);Unigene0023856(Zpr1);Unigene0026689(--)
GO:0009897	external side of plasma membrane	1	Unigene0000445(ABCG11);Unigene0007936(ABCG11)
GO:0015030	Cajal body	1	Unigene0017058(KIN10);Unigene0023856(Zpr1)
GO:0030130	clathrin coat of trans-Golgi network vesicle	1	Unigene0018888(At2g20760);Unigene0027764(Os04g0679100)
GO:0033646	host intracellular part	1	Unigene0021655(At3g43660);Unigene0033125(--)
GO:0043656	intracellular region of host	1	Unigene0021655(At3g43660);Unigene0033125(--)
GO:0019012	virion	1	Unigene0000707(PCMP-H24);Unigene0000816(UGT29);Unigene0003382(BRN1);Unigene0003918(LECRKS7);Unigene0007127(RBG2);Unigene0007412(CPRD49);Unigene0010019(GF14D);Unigene0010975(--);Unigene0011108(At1g18000);Unigene0012248(PMEU1);Unigene0017797(KIP1);Unigene0018622(--);Unigene0021489(apoeb);Unigene0022050(HSP70);Unigene0022224(PU1);Unigene0024787(--);Unigene0026338(GBF);Unigene0027160(PHS2);Unigene002…
GO:0005802	trans-Golgi network	1	Unigene0001105(TPST);Unigene0001911(At4g00750);Unigene0004478(RAN1);Unigene0004497(RLP4);Unigene0004692(At5g03700);Unigene0005615(CHER1);Unigene0006581(At2g32450);Unigene0006658(TMN2);Unigene0013049(TBL16);Unigene0013657(TBR);Unigene0014313(GAE6);Unigene0014806(ALA8);Unigene0016008(GAE4);Unigene0016173(XLT2);Unigene0017084(--);Unigene0017093(SPAC3H5.08c);Unigene0018674(PHO1-H1);Unigene0021924(At1…
GO:0044431	Golgi apparatus part	1	Unigene0001105(TPST);Unigene0001551(CSLC5);Unigene0001772(DIM);Unigene0001911(At4g00750);Unigene0002637(PDCD2);Unigene0002696(CSLA2);Unigene0002985(GATL7);Unigene0004478(RAN1);Unigene0004497(RLP4);Unigene0004692(At5g03700);Unigene0004712(CBP60B);Unigene0004965(LYPLA1);Unigene0005615(CHER1);Unigene0006069(GATL8);Unigene0006070(GATL8);Unigene0006581(At2g32450);Unigene0006658(TMN2);Unigene0008623(AT…
GO:0005736	DNA-directed RNA polymerase I complex	1	Unigene0028711(polr1c)
GO:0005766	primary lysosome	1	Unigene0035645(NAPRT1)
GO:0008180	COP9 signalosome	1	Unigene0001399(CSN1)
GO:0009330	DNA topoisomerase complex (ATP-hydrolyzing)	1	Unigene0031782(GYRB)
GO:0042582	azurophil granule	1	Unigene0035645(NAPRT1)
GO:0043527	tRNA methyltransferase complex	1	Unigene0017199(PIMT1)
GO:0005795	Golgi stack	1	Unigene0004965(LYPLA1);Unigene0012121(TSPO);Unigene0014313(GAE6);Unigene0016008(GAE4);Unigene0016173(XLT2);Unigene0022977(FT1);Unigene0027846(RABA6A)
GO:0072686	mitotic spindle	1	Unigene0015026(ZAT9);Unigene0024106(--);Unigene0028582(KIN8B);Unigene0030636(EBP2);Unigene0031769(TRN1);Unigene0032452(M3KE1);Unigene0036045(EFTS)
GO:0098794	postsynapse	1	Unigene0002114(dnaJ);Unigene0024982(PPC6-7);Unigene0026689(--)
GO:0012510	trans-Golgi network transport vesicle membrane	1	Unigene0018888(At2g20760);Unigene0027764(Os04g0679100)
GO:0030127	COPII vesicle coat	1	Unigene0030815(JKD);Unigene0030817(JKD)
GO:0034774	secretory granule lumen	1	Unigene0024675(HEMB1);Unigene0035645(NAPRT1)
GO:0009547	plastid ribosome	1	Unigene0003258(RPL9);Unigene0004021(RPL21);Unigene0007891(DCR);Unigene0015047(PRPS9);Unigene0025023(RPL17B);Unigene0025402(RPL10A);Unigene0028026(RPL28);Unigene0035234(RPS3A);Unigene0035935(rps2)
GO:0030894	replisome	1	Unigene0000962(EIF4A1);Unigene0003318(POLA);Unigene0011830(DCL4);Unigene0016526(DPB2);Unigene0017575(RFC4);Unigene0021610(At1g67320);Unigene0028929(--);Unigene0031916(RH3)
GO:0043601	nuclear replisome	1	Unigene0000962(EIF4A1);Unigene0003318(POLA);Unigene0011830(DCL4);Unigene0016526(DPB2);Unigene0017575(RFC4);Unigene0021610(At1g67320);Unigene0028929(--);Unigene0031916(RH3)
GO:0000776	kinetochore	1	Unigene0013385(CLASP);Unigene0015026(ZAT9);Unigene0017943(Cenpv);Unigene0022206(JGB);Unigene0022353(NEDD1);Unigene0024106(--);Unigene0026243(At5g63670);Unigene0028582(KIN8B);Unigene0028997(--);Unigene0031813(--);Unigene0036045(EFTS);Unigene0036065(LBD11);Unigene0036066(LBD11)
GO:0000315	organellar large ribosomal subunit	1	Unigene0000508(RPL12);Unigene0001487(rpl8);Unigene0002603(RPL13);Unigene0002615(RPL18);Unigene0003258(RPL9);Unigene0003458(rplR);Unigene0004021(RPL21);Unigene0005030(--);Unigene0005840(rpl35);Unigene0007196(RPL5);Unigene0007891(DCR);Unigene0010098(rpmH);Unigene0015509(RABA4D);Unigene0019010(--);Unigene0019371(--);Unigene0022815(RPL23);Unigene0022816(RPL23);Unigene0023387(FL);Unigene0023857(RPL27)…
GO:0005664	nuclear origin of replication recognition complex	1	Unigene0027463(ORC2)
GO:0005675	holo TFIIH complex	1	Unigene0008176(At4g30825)
GO:0009328	phenylalanine-tRNA ligase complex	1	Unigene0016368(IBI1)
GO:0030008	TRAPP complex	1	Unigene0004712(CBP60B)
GO:0090544	BAF-type complex	1	Unigene0024453(ARP4)
GO:0030313	cell envelope	1	Unigene0000944(--);Unigene0002218(BHLH147);Unigene0003560(EMB1417);Unigene0006581(At2g32450);Unigene0009820(PHB1);Unigene0010051(ARASP);Unigene0013279(JGB);Unigene0015248(--);Unigene0018219(SG1);Unigene0021750(CTPA2);Unigene0023729(DEGP10);Unigene0024992(MYB73);Unigene0025481(CTPA3);Unigene0029837(HCF107);Unigene0029885(pvadh);Unigene0030569(TIL);Unigene0030576(sti1);Unigene0031171(MRL1);Unigene0…
GO:0005635	nuclear envelope	1	Unigene0000346(NUP98A);Unigene0000569(IPT5);Unigene0010776(GAI1);Unigene0014347(IPT5);Unigene0014570(SUN2);Unigene0017058(KIN10);Unigene0017575(RFC4);Unigene0017717(xpo4);Unigene0021610(At1g67320);Unigene0022353(NEDD1);Unigene0025445(CNGC15C);Unigene0027820(--);Unigene0028558(At5g14050);Unigene0030158(Os07g0688000);Unigene0031769(TRN1);Unigene0032507(NPC1);Unigene0033376(At1g20050)
GO:0030125	clathrin vesicle coat	1	Unigene0018888(At2g20760);Unigene0027764(Os04g0679100)
GO:0030132	clathrin coat of coated pit	1	Unigene0018888(At2g20760);Unigene0027764(Os04g0679100)
GO:0030427	site of polarized growth	1	Unigene0023856(Zpr1);Unigene0031769(TRN1)
GO:0031983	vesicle lumen	1	Unigene0024675(HEMB1);Unigene0035645(NAPRT1)
GO:0060205	cytoplasmic membrane-bounded vesicle lumen	1	Unigene0024675(HEMB1);Unigene0035645(NAPRT1)
GO:0090568	nuclear transcriptional repressor complex	1	Unigene0004411(CLF);Unigene0033753(EZA1)
GO:0031985	Golgi cisterna	1	Unigene0014313(GAE6);Unigene0016008(GAE4);Unigene0016173(XLT2);Unigene0022977(FT1);Unigene0027846(RABA6A)
GO:0005747	mitochondrial respiratory chain complex I	1	Unigene0002998(UGT86A1);Unigene0024838(MLO4);Unigene0030906(--)
GO:0005871	kinesin complex	1	Unigene0006020(KIN14I);Unigene0009344(KIN5B);Unigene0028582(KIN8B)
GO:0030687	preribosome, large subunit precursor	1	Unigene0015922(nip7);Unigene0020048(nip7);Unigene0030636(EBP2)
GO:0031901	early endosome membrane	1	Unigene0005615(CHER1);Unigene0016879(VAMP721);Unigene0033005(VAMP724)
GO:0045271	respiratory chain complex I	1	Unigene0002998(UGT86A1);Unigene0024838(MLO4);Unigene0030906(--)
GO:0080008	Cul4-RING E3 ubiquitin ligase complex	1	Unigene0007714(SPA2);Unigene0008553(ORTH2);Unigene0025453(COP1);Unigene0026487(MSI4);Unigene0028558(At5g14050);Unigene0034477(MSI2)
GO:0000808	origin recognition complex	1	Unigene0027463(ORC2)
GO:0016507	mitochondrial fatty acid beta-oxidation multienzyme complex	1	Unigene0033908(MENB)
GO:0016605	PML body	1	Unigene0009809(CRY2)
GO:0030956	glutamyl-tRNA(Gln) amidotransferase complex	1	Unigene0031092(DIR11)
GO:0036125	fatty acid beta-oxidation multienzyme complex	1	Unigene0033908(MENB)
GO:0097346	INO80-type complex	1	Unigene0031374(TAF14B)
GO:1904813	ficolin-1-rich granule lumen	1	Unigene0024675(HEMB1)
GO:0099568	cytoplasmic region	1	Unigene0007221(--);Unigene0007222(EXO70B1);Unigene0013385(CLASP);Unigene0013464(At1g09380);Unigene0016904(WAV2);Unigene0019131(JGB);Unigene0022206(JGB);Unigene0023142(KIP1);Unigene0024106(--);Unigene0026114(CSI1);Unigene0026115(CSI1);Unigene0027296(--);Unigene0027584(PTEN1);Unigene0028091(DNAJB13);Unigene0028582(KIN8B);Unigene0030066(SEC3A);Unigene0030451(SEC15A);Unigene0030454(REN1);Unigene00311…
GO:0005577	fibrinogen complex	1	Unigene0024106(--);Unigene0028046(--)
GO:0071014	post-mRNA release spliceosomal complex	1	Unigene0024296(syf1);Unigene0035825(SKIPA)
GO:0012507	ER to Golgi transport vesicle membrane	1	Unigene0002637(PDCD2);Unigene0030815(JKD);Unigene0030817(JKD)
GO:0098793	presynapse	1	Unigene0001435(IREG2);Unigene0007124(LIP);Unigene0031246(FTIP3)
GO:0043596	nuclear replication fork	1	Unigene0000962(EIF4A1);Unigene0003318(POLA);Unigene0008561(GINS1);Unigene0011830(DCL4);Unigene0016526(DPB2);Unigene0017575(RFC4);Unigene0021610(At1g67320);Unigene0022134(CTF7);Unigene0028929(--);Unigene0031881(--);Unigene0031916(RH3)
GO:0000177	cytoplasmic exosome (RNase complex)	1	Unigene0023670(RRP4)
GO:0005685	U1 snRNP	1	Unigene0033186(GL3)
GO:0005700	polytene chromosome	1	Unigene0026243(At5g63670)
GO:0005838	proteasome regulatory particle	1	Unigene0014077(UGT90A1)
GO:0008278	cohesin complex	1	Unigene0015722(SMC4)
GO:0051286	cell tip	1	Unigene0027584(PTEN1)
GO:0101002	ficolin-1-rich granule	1	Unigene0024675(HEMB1)
GO:0016459	myosin complex	1	Unigene0000020(XI-F);Unigene0018035(XI-E);Unigene0025412(At4g15545);Unigene0028075(VIII-2);Unigene0036096(XI-K)
GO:0031970	organelle envelope lumen	1	Unigene0001456(TIM8);Unigene0011656(NTR1);Unigene0017058(KIN10);Unigene0025602(At2g44050)
GO:0033177	proton-transporting two-sector ATPase complex, proton-transporting domain	1	Unigene0003488(STC);Unigene0003716(VHA-c''1);Unigene0004920(VATP-P1);Unigene0004922(VATP-P1);Unigene0009205(UGT9);Unigene0011086(At5g15110);Unigene0012071(A1);Unigene0017059(--);Unigene0017128(PAM68);Unigene0023063(ATPG);Unigene0026092(POLIA);Unigene0026912(VHA-a3);Unigene0029361(VHA-a3)
GO:0005762	mitochondrial large ribosomal subunit	1	Unigene0005030(--);Unigene0007196(RPL5)
GO:0030140	trans-Golgi network transport vesicle	1	Unigene0018888(At2g20760);Unigene0027764(Os04g0679100)
GO:0033267	axon part	1	Unigene0023856(Zpr1);Unigene0024982(PPC6-7)
GO:0071007	U2-type catalytic step 2 spliceosome	1	Unigene0024296(syf1);Unigene0035825(SKIPA)
GO:0000312	plastid small ribosomal subunit	1	Unigene0015047(PRPS9);Unigene0035234(RPS3A);Unigene0035935(rps2)
GO:0005741	mitochondrial outer membrane	1	Unigene0000090(TOM7-1);Unigene0000263(AUR3);Unigene0000386(ICS2);Unigene0005332(BHLH68);Unigene0006512(TOM40-1);Unigene0009226(qtrt1);Unigene0018816(--);Unigene0021296(MYC2);Unigene0026393(BHLH112);Unigene0028902(BHLH68);Unigene0031635(SAE2)
GO:0045263	proton-transporting ATP synthase complex, coupling factor F(o)	1	Unigene0003488(STC);Unigene0009205(UGT9);Unigene0011086(At5g15110);Unigene0012071(A1);Unigene0017059(--);Unigene0017128(PAM68);Unigene0023063(ATPG);Unigene0026092(POLIA)
GO:0030133	transport vesicle	1	Unigene0001435(IREG2);Unigene0002637(PDCD2);Unigene0007124(LIP);Unigene0018888(At2g20760);Unigene0020969(SYP125);Unigene0022881(MYOB1);Unigene0027764(Os04g0679100);Unigene0030454(REN1);Unigene0030815(JKD);Unigene0030817(JKD);Unigene0031246(FTIP3);Unigene0032572(LNG1)
GO:0016592	mediator complex	1	Unigene0001477(TCX2);Unigene0015410(GT-3B);Unigene0024106(--);Unigene0028932(SDN3);Unigene0032298(--);Unigene0033846(At2g18193)
GO:0008023	transcription elongation factor complex	1	Unigene0005347(At2g41170);Unigene0026243(At5g63670);Unigene0026623(At2g32560);Unigene0026977(MED26C)
GO:0030425	dendrite	1	Unigene0000263(AUR3);Unigene0000813(ncdn);Unigene0016904(WAV2);Unigene0026689(--)
GO:0030964	NADH dehydrogenase complex	1	Unigene0002998(UGT86A1);Unigene0005805(--);Unigene0024838(MLO4);Unigene0030906(--)
GO:0097447	dendritic tree	1	Unigene0000263(AUR3);Unigene0000813(ncdn);Unigene0016904(WAV2);Unigene0026689(--)
GO:0000176	nuclear exosome (RNase complex)	1	Unigene0023670(RRP4)
GO:0000795	synaptonemal complex	1	Unigene0030037(HSK)
GO:0042470	melanosome	1	Unigene0000984(CCT4)
GO:0048770	pigment granule	1	Unigene0000984(CCT4)
GO:0042597	periplasmic space	1	Unigene0009820(PHB1);Unigene0010051(ARASP);Unigene0015248(--);Unigene0021750(CTPA2);Unigene0023729(DEGP10);Unigene0024045(FBPban1);Unigene0025481(CTPA3);Unigene0031883(BACOVA_02659);Unigene0032602(DEGP2);Unigene0035315(--)
GO:0000775	chromosome, centromeric region	1	Unigene0001782(--);Unigene0005601(DMT1);Unigene0005602(MET2);Unigene0010694(--);Unigene0013385(CLASP);Unigene0015026(ZAT9);Unigene0015722(SMC4);Unigene0017943(Cenpv);Unigene0022206(JGB);Unigene0022353(NEDD1);Unigene0024106(--);Unigene0024510(DSCC1);Unigene0026243(At5g63670);Unigene0027641(At3g49470);Unigene0028020(PSY1R);Unigene0028582(KIN8B);Unigene0028997(--);Unigene0029283(THA8);Unigene0031813…
GO:0045239	tricarboxylic acid cycle enzyme complex	1	Unigene0003368(At5g09300);Unigene0004784(EMB3003);Unigene0026216(BCCP1)
GO:0005794	Golgi apparatus	1	Unigene0001105(TPST);Unigene0001551(CSLC5);Unigene0001772(DIM);Unigene0001911(At4g00750);Unigene0002637(PDCD2);Unigene0002696(CSLA2);Unigene0002985(GATL7);Unigene0004478(RAN1);Unigene0004497(RLP4);Unigene0004692(At5g03700);Unigene0004712(CBP60B);Unigene0004965(LYPLA1);Unigene0005615(CHER1);Unigene0005835(PHOT2);Unigene0006069(GATL8);Unigene0006070(GATL8);Unigene0006581(At2g32450);Unigene0006647(C…
GO:0005643	nuclear pore	1	Unigene0000346(NUP98A);Unigene0010776(GAI1);Unigene0017717(xpo4);Unigene0030158(Os07g0688000);Unigene0031769(TRN1)
GO:0005768	endosome	1	Unigene0001105(TPST);Unigene0001453(COR2);Unigene0001581(SHR);Unigene0001911(At4g00750);Unigene0003160(CML5);Unigene0003716(VHA-c''1);Unigene0004478(RAN1);Unigene0004497(RLP4);Unigene0004692(At5g03700);Unigene0004712(CBP60B);Unigene0005615(CHER1);Unigene0006581(At2g32450);Unigene0006647(COPT5.1);Unigene0006658(TMN2);Unigene0007124(LIP);Unigene0013049(TBL16);Unigene0013510(VPS2.2);Unigene0013657(T…
GO:0005615	extracellular space	1	Unigene0003320(ACBP3);Unigene0003919(EXL3);Unigene0009773(CATHB2);Unigene0016000(LUS1);Unigene0018577(DDS);Unigene0023151(CKX7);Unigene0024106(--);Unigene0024675(HEMB1);Unigene0024767(RNS1);Unigene0025081(DGAT3);Unigene0027070(QSOX1);Unigene0028046(--);Unigene0031735(SODCP);Unigene0031736(SODCP);Unigene0032688(CATHB3);Unigene0034904(FLZ14);Unigene0035795(CYSEP)
GO:0000345	cytosolic DNA-directed RNA polymerase complex	1	Unigene0020754(NRPB1);Unigene0028711(polr1c)
GO:0000932	cytoplasmic mRNA processing body	1	Unigene0034321(FLZ8);Unigene0034942(FLZ8)
GO:0005783	endoplasmic reticulum	1	Unigene0000263(AUR3);Unigene0000494(--);Unigene0000862(RGI3);Unigene0000946(--);Unigene0001363(At5g50170);Unigene0001771(DIM);Unigene0001772(DIM);Unigene0002088(ERDJ3A);Unigene0002108(CYP98A2);Unigene0002594(P4H10);Unigene0002637(PDCD2);Unigene0003517(At2g25790);Unigene0004028(SEI1);Unigene0004052(LACS1);Unigene0004301(--);Unigene0005016(CAL1);Unigene0005128(ECR);Unigene0005314(CYP710A11);Unigene…
GO:0032806	carboxy-terminal domain protein kinase complex	1	Unigene0008176(At4g30825)
GO:0005657	replication fork	1	Unigene0000962(EIF4A1);Unigene0003318(POLA);Unigene0005601(DMT1);Unigene0005602(MET2);Unigene0008561(GINS1);Unigene0011830(DCL4);Unigene0016526(DPB2);Unigene0017575(RFC4);Unigene0021610(At1g67320);Unigene0022134(CTF7);Unigene0028929(--);Unigene0031881(--);Unigene0031916(RH3)
GO:0098588	bounding membrane of organelle	1	Unigene0000090(TOM7-1);Unigene0000263(AUR3);Unigene0000386(ICS2);Unigene0000494(--);Unigene0000786(At1g07660);Unigene0000815(ENODL1);Unigene0000946(--);Unigene0001105(TPST);Unigene0001434(MOT2);Unigene0001453(COR2);Unigene0001551(CSLC5);Unigene0001771(DIM);Unigene0001772(DIM);Unigene0001911(At4g00750);Unigene0002637(PDCD2);Unigene0002696(CSLA2);Unigene0002985(GATL7);Unigene0003160(CML5);Unigene00…
GO:0033176	proton-transporting V-type ATPase complex	1	Unigene0003716(VHA-c''1);Unigene0004920(VATP-P1);Unigene0004922(VATP-P1);Unigene0016742(VHA-B2);Unigene0023472(CVA69.24);Unigene0023474(CVA69.24);Unigene0026114(CSI1);Unigene0026115(CSI1);Unigene0026328(--);Unigene0026912(VHA-a3);Unigene0029361(VHA-a3);Unigene0030778(Ipo5);Unigene0030797(VATE);Unigene0031116(--);Unigene0031117(--);Unigene0031930(CSI3);Unigene0033857(IMPA1)
GO:0044456	synapse part	1	Unigene0001435(IREG2);Unigene0002114(dnaJ);Unigene0007124(LIP);Unigene0024982(PPC6-7);Unigene0026689(--);Unigene0031246(FTIP3)
GO:0005938	cell cortex	1	Unigene0007221(--);Unigene0007222(EXO70B1);Unigene0013385(CLASP);Unigene0013464(At1g09380);Unigene0019131(JGB);Unigene0022206(JGB);Unigene0023142(KIP1);Unigene0024106(--);Unigene0026114(CSI1);Unigene0026115(CSI1);Unigene0027584(PTEN1);Unigene0030066(SEC3A);Unigene0030451(SEC15A);Unigene0030454(REN1);Unigene0032677(JGB);Unigene0033617(EXO70B1);Unigene0033923(AIR9);Unigene0034638(At3g28050);Unigene…
GO:0022624	proteasome accessory complex	1	Unigene0014077(UGT90A1)
GO:0031252	cell leading edge	1	Unigene0028871(ssx2ip-a)
GO:0031227	intrinsic component of endoplasmic reticulum membrane	1	Unigene0005128(ECR);Unigene0005642(SYT3);Unigene0009085(KAT2);Unigene0011512(LCA1);Unigene0014626(UTR4);Unigene0019243(PAS2);Unigene0019973(DDB_G0272012);Unigene0020969(SYP125);Unigene0022098(LECRKS5);Unigene0024444(HACD2);Unigene0027863(SYT3);Unigene0028020(PSY1R);Unigene0029928(alg2);Unigene0030385(SPPL1);Unigene0031133(GLDP1);Unigene0031828(--)
GO:0000777	condensed chromosome kinetochore	1	Unigene0013385(CLASP);Unigene0015026(ZAT9);Unigene0017943(Cenpv);Unigene0022353(NEDD1);Unigene0024106(--);Unigene0036045(EFTS)
GO:0015630	microtubule cytoskeleton	1	Unigene0000015(TUBB1);Unigene0000344(TUBB1);Unigene0000984(CCT4);Unigene0006020(KIN14I);Unigene0007584(dapb1);Unigene0008683(--);Unigene0009344(KIN5B);Unigene0012286(SKP1A);Unigene0012329(dlcB);Unigene0013385(CLASP);Unigene0013572(TUBA3);Unigene0013806(RZFP34);Unigene0015026(ZAT9);Unigene0015163(--);Unigene0015164(--);Unigene0015491(KIN12D);Unigene0015492(KIN12D);Unigene0015493(--);Unigene0016141…
GO:0000145	exocyst	1	Unigene0007221(--);Unigene0007222(EXO70B1);Unigene0030066(SEC3A);Unigene0030451(SEC15A);Unigene0033617(EXO70B1)
GO:0045202	synapse	1	Unigene0001435(IREG2);Unigene0002114(dnaJ);Unigene0007124(LIP);Unigene0022368(JGB);Unigene0024982(PPC6-7);Unigene0026689(--);Unigene0031246(FTIP3);Unigene0031584(OFUT39)
GO:0005758	mitochondrial intermembrane space	1	Unigene0001456(TIM8);Unigene0011656(NTR1);Unigene0025602(At2g44050)
GO:0010008	endosome membrane	1	Unigene0003160(CML5);Unigene0005615(CHER1);Unigene0006658(TMN2);Unigene0013510(VPS2.2);Unigene0016234(PRA1E);Unigene0016879(VAMP721);Unigene0017093(SPAC3H5.08c);Unigene0017944(FAB1A);Unigene0020835(CRLK1);Unigene0020837(CRLK1);Unigene0025432(RGS1);Unigene0025739(VAMP713);Unigene0026689(--);Unigene0026796(dhmA);Unigene0026912(VHA-a3);Unigene0029361(VHA-a3);Unigene0030385(SPPL1);Unigene0031943(FAB1…
GO:0017053	transcriptional repressor complex	1	Unigene0004411(CLF);Unigene0033753(EZA1)
GO:0044421	extracellular region part	1	Unigene0003320(ACBP3);Unigene0003919(EXL3);Unigene0009773(CATHB2);Unigene0014381(1MMP);Unigene0016000(LUS1);Unigene0018577(DDS);Unigene0022972(ARPN);Unigene0023151(CKX7);Unigene0024106(--);Unigene0024675(HEMB1);Unigene0024767(RNS1);Unigene0025081(DGAT3);Unigene0027070(QSOX1);Unigene0028046(--);Unigene0031735(SODCP);Unigene0031736(SODCP);Unigene0032688(CATHB3);Unigene0034904(FLZ14);Unigene0035795(…
GO:0030684	preribosome	1	Unigene0013703(--);Unigene0014901(Nol6);Unigene0015922(nip7);Unigene0020048(nip7);Unigene0020295(HDT1);Unigene0027926(DIEXF);Unigene0028558(At5g14050);Unigene0029335(EMB2271);Unigene0029793(DIEXF);Unigene0029796(utp25);Unigene0030636(EBP2);Unigene0035064(RPS7)
GO:0044815	DNA packaging complex	1	Unigene0000786(At1g07660);Unigene0015722(SMC4);Unigene0022255(At1g08170);Unigene0029665(DDM1);Unigene0031629(--);Unigene0035608(SN1)
GO:0033588	Elongator holoenzyme complex	1	Unigene0025057(CGL160)
GO:0071010	prespliceosome	1	Unigene0024296(syf1)
GO:0000786	nucleosome	1	Unigene0000786(At1g07660);Unigene0022255(At1g08170);Unigene0029665(DDM1);Unigene0031629(--);Unigene0035608(SN1)
GO:0010494	cytoplasmic stress granule	1	Unigene0025806(RBP47C);Unigene0034321(FLZ8);Unigene0034942(FLZ8)
GO:0030134	ER to Golgi transport vesicle	1	Unigene0002637(PDCD2);Unigene0030815(JKD);Unigene0030817(JKD)
GO:0032592	integral component of mitochondrial membrane	1	Unigene0025666(At5g48970);Unigene0030867(rnf170);Unigene0033742(TIM23-1)
GO:0098573	intrinsic component of mitochondrial membrane	1	Unigene0025666(At5g48970);Unigene0030867(rnf170);Unigene0033742(TIM23-1)
GO:0030665	clathrin-coated vesicle membrane	1	Unigene0018888(At2g20760);Unigene0027764(Os04g0679100)
GO:0030658	transport vesicle membrane	1	Unigene0002637(PDCD2);Unigene0007124(LIP);Unigene0018888(At2g20760);Unigene0027764(Os04g0679100);Unigene0030815(JKD);Unigene0030817(JKD);Unigene0031246(FTIP3)
GO:0099503	secretory vesicle	1	Unigene0001435(IREG2);Unigene0007124(LIP);Unigene0024675(HEMB1);Unigene0030454(REN1);Unigene0031246(FTIP3);Unigene0035645(NAPRT1)
GO:0098796	membrane protein complex	1	Unigene0000090(TOM7-1);Unigene0000226(HMA4);Unigene0000263(AUR3);Unigene0000283(ABCG18);Unigene0000445(ABCG11);Unigene0000565(YMF16);Unigene0000781(ABCG32);Unigene0000806(IPT1);Unigene0000849(ABCB4);Unigene0000946(--);Unigene0000973(CURT1B);Unigene0001453(COR2);Unigene0001456(TIM8);Unigene0001571(HMA5);Unigene0001644(PSBQ2);Unigene0002164(At1g76070);Unigene0002953(PSB27-1);Unigene0002998(UGT86A1)…
GO:0000314	organellar small ribosomal subunit	1	Unigene0000020(XI-F);Unigene0000926(PDE338);Unigene0001730(RPS9C);Unigene0002467(UGT76B1);Unigene0013344(GSVIVT00034021001);Unigene0015047(PRPS9);Unigene0018509(RPS20);Unigene0025898(RPS15);Unigene0026923(RPS5);Unigene0026925(RPS5);Unigene0027661(RPS9C);Unigene0028266(PNP1);Unigene0028731(RPS9);Unigene0029568(rpsa);Unigene0031778(RPS6);Unigene0032170(PETs);Unigene0035150(rps21);Unigene0035234(RPS…
GO:0000778	condensed nuclear chromosome kinetochore	1	Unigene0015026(ZAT9);Unigene0024106(--);Unigene0036045(EFTS)
GO:0005849	mRNA cleavage factor complex	1	Unigene0001952(CFIS1)
GO:0005885	Arp2/3 protein complex	1	Unigene0024478(HAT4)
GO:0017119	Golgi transport complex	1	Unigene0030066(SEC3A)
GO:0031312	extrinsic component of organelle membrane	1	Unigene0004301(--)
GO:0044440	endosomal part	1	Unigene0001453(COR2);Unigene0003160(CML5);Unigene0004712(CBP60B);Unigene0005615(CHER1);Unigene0006658(TMN2);Unigene0013510(VPS2.2);Unigene0016234(PRA1E);Unigene0016879(VAMP721);Unigene0017093(SPAC3H5.08c);Unigene0017944(FAB1A);Unigene0020835(CRLK1);Unigene0020837(CRLK1);Unigene0025432(RGS1);Unigene0025739(VAMP713);Unigene0026689(--);Unigene0026796(dhmA);Unigene0026912(VHA-a3);Unigene0029361(VHA-a…
GO:0000922	spindle pole	1	Unigene0022353(NEDD1);Unigene0030636(EBP2);Unigene0032452(M3KE1);Unigene0033124(MAP65-8)
GO:0045262	plasma membrane proton-transporting ATP synthase complex, catalytic core F(1)	1	Unigene0009623(ATPC);Unigene0016702(--);Unigene0016742(VHA-B2);Unigene0018232(ATPD);Unigene0023155(--);Unigene0023474(CVA69.24)
GO:0015629	actin cytoskeleton	1	Unigene0000020(XI-F);Unigene0002114(dnaJ);Unigene0018035(XI-E);Unigene0019131(JGB);Unigene0020058(FIM5);Unigene0024478(HAT4);Unigene0025412(At4g15545);Unigene0027911(VLN3);Unigene0028075(VIII-2);Unigene0028651(ADF7);Unigene0029928(alg2);Unigene0031819(FIM2);Unigene0032677(JGB);Unigene0034607(--);Unigene0036096(XI-K)
GO:0005764	lysosome	1	Unigene0002859(BACOVA_02659);Unigene0006494(--);Unigene0009029(At5g66150);Unigene0009773(CATHB2);Unigene0014124(BACOVA_02659);Unigene0015655(PRCP);Unigene0026912(VHA-a3);Unigene0029361(VHA-a3);Unigene0030385(SPPL1);Unigene0032081(FLCY);Unigene0032507(NPC1);Unigene0032688(CATHB3);Unigene0035645(NAPRT1);Unigene0035795(CYSEP)
GO:0000779	condensed chromosome, centromeric region	1	Unigene0013385(CLASP);Unigene0015026(ZAT9);Unigene0017943(Cenpv);Unigene0022353(NEDD1);Unigene0024106(--);Unigene0036045(EFTS)
GO:0044448	cell cortex part	1	Unigene0007221(--);Unigene0007222(EXO70B1);Unigene0019131(JGB);Unigene0023142(KIP1);Unigene0024106(--);Unigene0026114(CSI1);Unigene0026115(CSI1);Unigene0027584(PTEN1);Unigene0030066(SEC3A);Unigene0030451(SEC15A);Unigene0032677(JGB);Unigene0033617(EXO70B1);Unigene0033923(AIR9)
GO:0016272	prefoldin complex	1	Unigene0014410(At3g22480)
GO:0031300	intrinsic component of organelle membrane	1	Unigene0003160(CML5);Unigene0005128(ECR);Unigene0005642(SYT3);Unigene0008623(ATHB-54);Unigene0009085(KAT2);Unigene0011512(LCA1);Unigene0014626(UTR4);Unigene0015286(PEX11C);Unigene0016173(XLT2);Unigene0019243(PAS2);Unigene0019973(DDB_G0272012);Unigene0020969(SYP125);Unigene0022098(LECRKS5);Unigene0024444(HACD2);Unigene0025397(CYP76T24);Unigene0025666(At5g48970);Unigene0026720(PXN);Unigene0026721(P…
GO:0005765	lysosomal membrane	1	Unigene0006494(--);Unigene0026912(VHA-a3);Unigene0029361(VHA-a3);Unigene0030385(SPPL1);Unigene0032507(NPC1)
GO:0030118	clathrin coat	1	Unigene0018888(At2g20760);Unigene0027764(Os04g0679100)
GO:0048501	signal recognition particle, plasma membrane targeting	1	Unigene0021784(R1A-10);Unigene0030345(FFC)
GO:0031248	protein acetyltransferase complex	1	Unigene0016544(ATL5);Unigene0018099(eaf6);Unigene0024453(ARP4);Unigene0026499(ERF008);Unigene0030320(RHB1A);Unigene0031374(TAF14B)
GO:1902493	acetyltransferase complex	1	Unigene0016544(ATL5);Unigene0018099(eaf6);Unigene0024453(ARP4);Unigene0026499(ERF008);Unigene0030320(RHB1A);Unigene0031374(TAF14B)
GO:0005801	cis-Golgi network	1	Unigene0001078(SYP125);Unigene0017351(BZIP44);Unigene0021633(SUC4)
GO:0030686	90S preribosome	1	Unigene0014901(Nol6);Unigene0028558(At5g14050);Unigene0035064(RPS7)
GO:0030176	integral component of endoplasmic reticulum membrane	1	Unigene0005128(ECR);Unigene0009085(KAT2);Unigene0011512(LCA1);Unigene0014626(UTR4);Unigene0019243(PAS2);Unigene0019973(DDB_G0272012);Unigene0020969(SYP125);Unigene0022098(LECRKS5);Unigene0024444(HACD2);Unigene0028020(PSY1R);Unigene0029928(alg2);Unigene0030385(SPPL1);Unigene0031133(GLDP1);Unigene0031828(--)
GO:0000178	exosome (RNase complex)	1	Unigene0023670(RRP4)
GO:0097458	neuron part	1	Unigene0000263(AUR3);Unigene0000813(ncdn);Unigene0001435(IREG2);Unigene0001904(OsI_16936);Unigene0005601(DMT1);Unigene0005602(MET2);Unigene0007124(LIP);Unigene0016904(WAV2);Unigene0023856(Zpr1);Unigene0024982(PPC6-7);Unigene0026689(--);Unigene0031246(FTIP3);Unigene0034344(PSP)
GO:0005667	transcription factor complex	1	Unigene0008176(At4g30825);Unigene0008225(--);Unigene0010877(GATA9);Unigene0011370(RAX3);Unigene0013703(--);Unigene0017058(KIN10);Unigene0022368(JGB);Unigene0031128(GATA17);Unigene0031368(GATA17);Unigene0033945(GATA9);Unigene0034642(GATA15)
GO:0005815	microtubule organizing center	1	Unigene0000984(CCT4);Unigene0013385(CLASP);Unigene0017058(KIN10);Unigene0022206(JGB);Unigene0022353(NEDD1);Unigene0024106(--);Unigene0028871(ssx2ip-a);Unigene0029130(SR1IP1);Unigene0029352(HOX22);Unigene0030636(EBP2);Unigene0031859(--);Unigene0032452(M3KE1);Unigene0033439(--);Unigene0035961(CPRF2)
GO:0044430	cytoskeletal part	1	Unigene0000015(TUBB1);Unigene0000020(XI-F);Unigene0000344(TUBB1);Unigene0000984(CCT4);Unigene0002114(dnaJ);Unigene0006020(KIN14I);Unigene0007584(dapb1);Unigene0008683(--);Unigene0009344(KIN5B);Unigene0010862(At2g19810);Unigene0012286(SKP1A);Unigene0012329(dlcB);Unigene0013385(CLASP);Unigene0013572(TUBA3);Unigene0013806(RZFP34);Unigene0015026(ZAT9);Unigene0015163(--);Unigene0015164(--);Unigene0015…
GO:0070603	SWI/SNF superfamily-type complex	1	Unigene0024453(ARP4);Unigene0031374(TAF14B)
GO:0098805	whole membrane	1	Unigene0000090(TOM7-1);Unigene0000263(AUR3);Unigene0000386(ICS2);Unigene0000786(At1g07660);Unigene0000815(ENODL1);Unigene0001434(MOT2);Unigene0001435(IREG2);Unigene0001453(COR2);Unigene0001771(DIM);Unigene0001772(DIM);Unigene0002114(dnaJ);Unigene0002637(PDCD2);Unigene0002869(CNGC18);Unigene0003160(CML5);Unigene0003574(TIP1-1);Unigene0003594(MTP9);Unigene0003716(VHA-c''1);Unigene0004248(AAE3);Unig…
GO:0030136	clathrin-coated vesicle	1	Unigene0008941(At1g25240);Unigene0018888(At2g20760);Unigene0027764(Os04g0679100);Unigene0036521(At4g40080)
GO:0031301	integral component of organelle membrane	1	Unigene0003160(CML5);Unigene0005128(ECR);Unigene0008623(ATHB-54);Unigene0009085(KAT2);Unigene0011512(LCA1);Unigene0014626(UTR4);Unigene0015286(PEX11C);Unigene0016173(XLT2);Unigene0019243(PAS2);Unigene0019973(DDB_G0272012);Unigene0020969(SYP125);Unigene0022098(LECRKS5);Unigene0024444(HACD2);Unigene0025397(CYP76T24);Unigene0025666(At5g48970);Unigene0026720(PXN);Unigene0026721(PXN);Unigene0027070(QS…
GO:0000780	condensed nuclear chromosome, centromeric region	1	Unigene0015026(ZAT9);Unigene0024106(--);Unigene0036045(EFTS)
GO:0005788	endoplasmic reticulum lumen	1	Unigene0002088(ERDJ3A);Unigene0002594(P4H10);Unigene0028751(CRT3)
GO:0000123	histone acetyltransferase complex	1	Unigene0016544(ATL5);Unigene0018099(eaf6);Unigene0024453(ARP4);Unigene0030320(RHB1A);Unigene0031374(TAF14B)
GO:0005813	centrosome	1	Unigene0000984(CCT4);Unigene0017058(KIN10);Unigene0022206(JGB);Unigene0022353(NEDD1);Unigene0028871(ssx2ip-a);Unigene0032452(M3KE1);Unigene0033439(--)
GO:0033178	proton-transporting two-sector ATPase complex, catalytic domain	1	Unigene0009623(ATPC);Unigene0016702(--);Unigene0016742(VHA-B2);Unigene0018232(ATPD);Unigene0023155(--);Unigene0023474(CVA69.24);Unigene0026114(CSI1);Unigene0026115(CSI1);Unigene0026328(--);Unigene0030778(Ipo5);Unigene0030797(VATE);Unigene0031116(--);Unigene0031117(--);Unigene0031930(CSI3);Unigene0033857(IMPA1)
GO:0005769	early endosome	1	Unigene0001581(SHR);Unigene0005615(CHER1);Unigene0016879(VAMP721);Unigene0019074(SHR);Unigene0019619(ATL5);Unigene0033005(VAMP724);Unigene0035492(LOG2)
GO:0012505	endomembrane system	1	Unigene0000263(AUR3);Unigene0000346(NUP98A);Unigene0000494(--);Unigene0000569(IPT5);Unigene0000862(RGI3);Unigene0000946(--);Unigene0001105(TPST);Unigene0001363(At5g50170);Unigene0001435(IREG2);Unigene0001453(COR2);Unigene0001551(CSLC5);Unigene0001581(SHR);Unigene0001771(DIM);Unigene0001772(DIM);Unigene0001911(At4g00750);Unigene0002088(ERDJ3A);Unigene0002108(CYP98A2);Unigene0002594(P4H10);Unigene0…
GO:0012506	vesicle membrane	1	Unigene0000815(ENODL1);Unigene0002194(PAT22);Unigene0002637(PDCD2);Unigene0002869(CNGC18);Unigene0007124(LIP);Unigene0008045(DGD1);Unigene0008046(DGD1);Unigene0018888(At2g20760);Unigene0020143(At2g25060);Unigene0024997(DGD2);Unigene0025690(CYP87A3);Unigene0026912(VHA-a3);Unigene0027764(Os04g0679100);Unigene0029361(VHA-a3);Unigene0030385(SPPL1);Unigene0030815(JKD);Unigene0030817(JKD);Unigene003124…
GO:0030659	cytoplasmic vesicle membrane	1	Unigene0000815(ENODL1);Unigene0002194(PAT22);Unigene0002637(PDCD2);Unigene0002869(CNGC18);Unigene0007124(LIP);Unigene0008045(DGD1);Unigene0008046(DGD1);Unigene0018888(At2g20760);Unigene0020143(At2g25060);Unigene0024997(DGD2);Unigene0025690(CYP87A3);Unigene0026912(VHA-a3);Unigene0027764(Os04g0679100);Unigene0029361(VHA-a3);Unigene0030385(SPPL1);Unigene0030815(JKD);Unigene0030817(JKD);Unigene003124…
GO:0000313	organellar ribosome	1	Unigene0000020(XI-F);Unigene0000508(RPL12);Unigene0000926(PDE338);Unigene0001487(rpl8);Unigene0001730(RPS9C);Unigene0002467(UGT76B1);Unigene0002603(RPL13);Unigene0002615(RPL18);Unigene0003258(RPL9);Unigene0003458(rplR);Unigene0004021(RPL21);Unigene0005030(--);Unigene0005840(rpl35);Unigene0007196(RPL5);Unigene0007891(DCR);Unigene0010098(rpmH);Unigene0013344(GSVIVT00034021001);Unigene0015047(PRPS9)…
GO:0031090	organelle membrane	1	Unigene0000090(TOM7-1);Unigene0000263(AUR3);Unigene0000346(NUP98A);Unigene0000386(ICS2);Unigene0000400(PHYLLO);Unigene0000494(--);Unigene0000565(YMF16);Unigene0000569(IPT5);Unigene0000659(PPT2);Unigene0000726(CRD1);Unigene0000786(At1g07660);Unigene0000815(ENODL1);Unigene0000936(TIC20-V);Unigene0000946(--);Unigene0000947(CHLG);Unigene0001105(TPST);Unigene0001434(MOT2);Unigene0001453(COR2);Unigene0…
GO:0031902	late endosome membrane	1	Unigene0005615(CHER1);Unigene0025739(VAMP713);Unigene0032507(NPC1);Unigene0033790(ALIS3)
GO:0009288	bacterial-type flagellum	1	Unigene0016742(VHA-B2);Unigene0022847(MSSP2);Unigene0023474(CVA69.24);Unigene0029113(ABCB15);Unigene0030066(SEC3A)
GO:0000275	mitochondrial proton-transporting ATP synthase complex, catalytic core F(1)	1	Unigene0009623(ATPC);Unigene0016702(--);Unigene0016742(VHA-B2);Unigene0018232(ATPD);Unigene0023155(--);Unigene0023474(CVA69.24)
GO:0005759	mitochondrial matrix	1	Unigene0001820(ALDH7B4);Unigene0002049(At4g12130);Unigene0002114(dnaJ);Unigene0002925(GDCST);Unigene0003324(--);Unigene0003368(At5g09300);Unigene0004700(mrm1);Unigene0005030(--);Unigene0005725(AG118);Unigene0007196(RPL5);Unigene0007304(HMGCL);Unigene0011656(NTR1);Unigene0015445(At2g39795);Unigene0016702(--);Unigene0016767(FBL17);Unigene0022197(At2g39795);Unigene0023729(DEGP10);Unigene0024161(ALDH…
GO:0005669	transcription factor TFIID complex	1	Unigene0008225(--)
GO:0005786	signal recognition particle, endoplasmic reticulum targeting	1	Unigene0030345(FFC)
GO:0045261	proton-transporting ATP synthase complex, catalytic core F(1)	1	Unigene0009623(ATPC);Unigene0016702(--);Unigene0016742(VHA-B2);Unigene0018232(ATPD);Unigene0023155(--);Unigene0023474(CVA69.24)
GO:0022627	cytosolic small ribosomal subunit	1	Unigene0000020(XI-F);Unigene0000926(PDE338);Unigene0001730(RPS9C);Unigene0002467(UGT76B1);Unigene0004440(RPS31);Unigene0005781(RPS17);Unigene0006803(PLP6);Unigene0013344(GSVIVT00034021001);Unigene0015047(PRPS9);Unigene0016961(RPS18A);Unigene0018509(RPS20);Unigene0019974(RPS28);Unigene0025518(RPS11);Unigene0025898(RPS15);Unigene0026923(RPS5);Unigene0026925(RPS5);Unigene0027661(RPS9C);Unigene002778…
GO:1902494	catalytic complex	1	Unigene0000027(ctps);Unigene0000129(CAC3);Unigene0000226(HMA4);Unigene0000283(ABCG18);Unigene0000366(CHLP);Unigene0000400(PHYLLO);Unigene0000445(ABCG11);Unigene0000625(ZDS);Unigene0000682(RECQL1);Unigene0000781(ABCG32);Unigene0000806(IPT1);Unigene0000849(ABCB4);Unigene0000867(BGAL8);Unigene0000901(Os04g0590900);Unigene0000946(--);Unigene0000962(EIF4A1);Unigene0001259(CBF5);Unigene0001371(BT3);Uni…
GO:0045264	plasma membrane proton-transporting ATP synthase complex, coupling factor F(o)	1	Unigene0023063(ATPG)
GO:0005856	cytoskeleton	1	Unigene0000015(TUBB1);Unigene0000020(XI-F);Unigene0000344(TUBB1);Unigene0000984(CCT4);Unigene0001772(DIM);Unigene0002114(dnaJ);Unigene0005615(CHER1);Unigene0006020(KIN14I);Unigene0007584(dapb1);Unigene0008683(--);Unigene0009344(KIN5B);Unigene0010862(At2g19810);Unigene0012286(SKP1A);Unigene0012329(dlcB);Unigene0013385(CLASP);Unigene0013572(TUBA3);Unigene0013806(RZFP34);Unigene0015026(ZAT9);Unigene…
GO:0030119	AP-type membrane coat adaptor complex	1	Unigene0030219(--);Unigene0031743(UBC10)
GO:0043005	neuron projection	1	Unigene0000263(AUR3);Unigene0000813(ncdn);Unigene0016904(WAV2);Unigene0023856(Zpr1);Unigene0024982(PPC6-7);Unigene0026689(--);Unigene0034344(PSP)
GO:0000276	mitochondrial proton-transporting ATP synthase complex, coupling factor F(o)	1	Unigene0009205(UGT9);Unigene0011086(At5g15110);Unigene0017059(--);Unigene0023063(ATPG)
GO:0044463	cell projection part	1	Unigene0000263(AUR3);Unigene0000813(ncdn);Unigene0016904(WAV2);Unigene0022353(NEDD1);Unigene0023856(Zpr1);Unigene0024982(PPC6-7);Unigene0026689(--);Unigene0027296(--);Unigene0028091(DNAJB13);Unigene0028582(KIN8B);Unigene0028871(ssx2ip-a);Unigene0031179(TPT);Unigene0032434(tif34)
GO:0030496	midbody	1	Unigene0033617(EXO70B1)
GO:0070461	SAGA-type complex	1	Unigene0016544(ATL5)
GO:0098687	chromosomal region	1	Unigene0001782(--);Unigene0005601(DMT1);Unigene0005602(MET2);Unigene0008553(ORTH2);Unigene0010694(--);Unigene0013385(CLASP);Unigene0015026(ZAT9);Unigene0015722(SMC4);Unigene0017058(KIN10);Unigene0017943(Cenpv);Unigene0017976(ORTH2);Unigene0017978(ORTH2);Unigene0022206(JGB);Unigene0022353(NEDD1);Unigene0024106(--);Unigene0024510(DSCC1);Unigene0025823(HAG2);Unigene0026243(At5g63670);Unigene0027641(…
GO:0005819	spindle	1	Unigene0009344(KIN5B);Unigene0012286(SKP1A);Unigene0013385(CLASP);Unigene0015026(ZAT9);Unigene0017943(Cenpv);Unigene0022206(JGB);Unigene0022353(NEDD1);Unigene0024106(--);Unigene0025532(GCL1);Unigene0028582(KIN8B);Unigene0030636(EBP2);Unigene0031769(TRN1);Unigene0032452(M3KE1);Unigene0033124(MAP65-8);Unigene0036045(EFTS)
GO:0015935	small ribosomal subunit	1	Unigene0000020(XI-F);Unigene0000926(PDE338);Unigene0001730(RPS9C);Unigene0002467(UGT76B1);Unigene0004440(RPS31);Unigene0005781(RPS17);Unigene0006803(PLP6);Unigene0013344(GSVIVT00034021001);Unigene0015047(PRPS9);Unigene0016961(RPS18A);Unigene0018509(RPS20);Unigene0019974(RPS28);Unigene0025518(RPS11);Unigene0025898(RPS15);Unigene0026923(RPS5);Unigene0026925(RPS5);Unigene0027661(RPS9C);Unigene002778…
GO:0048471	perinuclear region of cytoplasm	1	Unigene0004461(FIGL1);Unigene0017093(SPAC3H5.08c);Unigene0017575(RFC4);Unigene0019007(HEN1);Unigene0023856(Zpr1);Unigene0029928(alg2);Unigene0032507(NPC1);Unigene0033875(ARF);Unigene0034175(--)
GO:0005844	polysome	1	Unigene0019974(RPS28)
GO:0005852	eukaryotic translation initiation factor 3 complex	1	Unigene0008792(KLCR2)
GO:0043231	intracellular membrane-bounded organelle	1	Unigene0000090(TOM7-1);Unigene0000117(WRKY22);Unigene0000263(AUR3);Unigene0000337(DVR);Unigene0000346(NUP98A);Unigene0000366(CHLP);Unigene0000386(ICS2);Unigene0000400(PHYLLO);Unigene0000428(NQR);Unigene0000458(HEME1);Unigene0000494(--);Unigene0000496(FDH1);Unigene0000533(BASS1);Unigene0000565(YMF16);Unigene0000569(IPT5);Unigene0000589(NAA50);Unigene0000616(AAE17);Unigene0000659(PPT2);Unigene00006…
GO:0032993	protein-DNA complex	1	Unigene0000786(At1g07660);Unigene0000962(EIF4A1);Unigene0003318(POLA);Unigene0008561(GINS1);Unigene0011830(DCL4);Unigene0016526(DPB2);Unigene0017575(RFC4);Unigene0021610(At1g67320);Unigene0022255(At1g08170);Unigene0028929(--);Unigene0029665(DDM1);Unigene0031629(--);Unigene0031881(--);Unigene0031916(RH3);Unigene0035608(SN1)
GO:0030141	secretory granule	1	Unigene0024675(HEMB1);Unigene0035645(NAPRT1)
GO:0030424	axon	1	Unigene0023856(Zpr1);Unigene0024982(PPC6-7)
GO:0000781	chromosome, telomeric region	1	Unigene0017058(KIN10);Unigene0025823(HAG2);Unigene0026243(At5g63670);Unigene0031374(TAF14B);Unigene0032518(CRK42);Unigene0033439(--)
GO:0005746	mitochondrial respiratory chain	1	Unigene0002998(UGT86A1);Unigene0024838(MLO4);Unigene0030906(--)
GO:1990234	transferase complex	1	Unigene0000400(PHYLLO);Unigene0000901(Os04g0590900);Unigene0000946(--);Unigene0000962(EIF4A1);Unigene0001371(BT3);Unigene0001406(WAV3);Unigene0001532(SIS3);Unigene0002072(ATL6);Unigene0002329(atad-3);Unigene0002674(At5g45720);Unigene0002690(ATL46);Unigene0003007(--);Unigene0003082(PDC1);Unigene0003091(WAVH1);Unigene0003318(POLA);Unigene0003368(At5g09300);Unigene0003967(CLPX1);Unigene0004006(CALS5…
GO:0043227	membrane-bounded organelle	1	Unigene0000090(TOM7-1);Unigene0000117(WRKY22);Unigene0000263(AUR3);Unigene0000337(DVR);Unigene0000346(NUP98A);Unigene0000366(CHLP);Unigene0000386(ICS2);Unigene0000400(PHYLLO);Unigene0000428(NQR);Unigene0000458(HEME1);Unigene0000494(--);Unigene0000496(FDH1);Unigene0000533(BASS1);Unigene0000565(YMF16);Unigene0000569(IPT5);Unigene0000589(NAA50);Unigene0000616(AAE17);Unigene0000659(PPT2);Unigene00006…
GO:0090575	RNA polymerase II transcription factor complex	1	Unigene0008176(At4g30825);Unigene0008225(--);Unigene0011370(RAX3);Unigene0013703(--)
GO:0005770	late endosome	1	Unigene0001581(SHR);Unigene0005615(CHER1);Unigene0006647(COPT5.1);Unigene0019074(SHR);Unigene0025739(VAMP713);Unigene0032507(NPC1);Unigene0033790(ALIS3);Unigene0033802(--)
GO:0022625	cytosolic large ribosomal subunit	1	Unigene0000508(RPL12);Unigene0001487(rpl8);Unigene0001799(RPL7);Unigene0002603(RPL13);Unigene0002615(RPL18);Unigene0003258(RPL9);Unigene0003458(rplR);Unigene0004021(RPL21);Unigene0005840(rpl35);Unigene0007196(RPL5);Unigene0007891(DCR);Unigene0010098(rpmH);Unigene0015509(RABA4D);Unigene0019010(--);Unigene0019371(--);Unigene0022815(RPL23);Unigene0022816(RPL23);Unigene0023387(FL);Unigene0023857(RPL2…
GO:0045260	plasma membrane proton-transporting ATP synthase complex	1	Unigene0009623(ATPC);Unigene0016702(--);Unigene0016742(VHA-B2);Unigene0018232(ATPD);Unigene0023063(ATPG);Unigene0023155(--);Unigene0023474(CVA69.24)
GO:0045259	proton-transporting ATP synthase complex	1	Unigene0003488(STC);Unigene0009205(UGT9);Unigene0009623(ATPC);Unigene0011086(At5g15110);Unigene0012071(A1);Unigene0016702(--);Unigene0016742(VHA-B2);Unigene0017059(--);Unigene0017128(PAM68);Unigene0018232(ATPD);Unigene0023063(ATPG);Unigene0023155(--);Unigene0023474(CVA69.24);Unigene0026092(POLIA)
GO:0061695	transferase complex, transferring phosphorus-containing groups	1	Unigene0000962(EIF4A1);Unigene0002329(atad-3);Unigene0002674(At5g45720);Unigene0003007(--);Unigene0003318(POLA);Unigene0003967(CLPX1);Unigene0008176(At4g30825);Unigene0008225(--);Unigene0008411(CAM-1);Unigene0011370(RAX3);Unigene0011581(CYCT1-1);Unigene0011830(DCL4);Unigene0013703(--);Unigene0014416(At5g17760);Unigene0014841(RPOT1-TOM);Unigene0015470(NEN3);Unigene0016283(--);Unigene0016403(CDC48B…
GO:0015934	large ribosomal subunit	1	Unigene0000508(RPL12);Unigene0001487(rpl8);Unigene0001799(RPL7);Unigene0002603(RPL13);Unigene0002615(RPL18);Unigene0003258(RPL9);Unigene0003458(rplR);Unigene0004021(RPL21);Unigene0005030(--);Unigene0005840(rpl35);Unigene0007196(RPL5);Unigene0007891(DCR);Unigene0010098(rpmH);Unigene0015509(RABA4D);Unigene0019010(--);Unigene0019371(--);Unigene0022815(RPL23);Unigene0022816(RPL23);Unigene0023387(FL);…
GO:0030120	vesicle coat	1	Unigene0018888(At2g20760);Unigene0027764(Os04g0679100);Unigene0030815(JKD);Unigene0030817(JKD)
GO:0000794	condensed nuclear chromosome	1	Unigene0014901(Nol6);Unigene0015026(ZAT9);Unigene0015722(SMC4);Unigene0024106(--);Unigene0030037(HSK);Unigene0036045(EFTS)
GO:0000793	condensed chromosome	1	Unigene0013385(CLASP);Unigene0014901(Nol6);Unigene0015026(ZAT9);Unigene0015722(SMC4);Unigene0017058(KIN10);Unigene0017943(Cenpv);Unigene0022353(NEDD1);Unigene0024106(--);Unigene0030037(HSK);Unigene0034599(SNI1);Unigene0036045(EFTS)
GO:0016469	proton-transporting two-sector ATPase complex	1	Unigene0003488(STC);Unigene0003716(VHA-c''1);Unigene0004920(VATP-P1);Unigene0004922(VATP-P1);Unigene0009205(UGT9);Unigene0009623(ATPC);Unigene0011086(At5g15110);Unigene0012071(A1);Unigene0016702(--);Unigene0016742(VHA-B2);Unigene0017059(--);Unigene0017128(PAM68);Unigene0018232(ATPD);Unigene0023063(ATPG);Unigene0023155(--);Unigene0023472(CVA69.24);Unigene0023474(CVA69.24);Unigene0026092(POLIA);Uni…
GO:0044452	nucleolar part	1	Unigene0001259(CBF5);Unigene0014901(Nol6);Unigene0028558(At5g14050);Unigene0028711(polr1c);Unigene0029335(EMB2271)
GO:0030660	Golgi-associated vesicle membrane	1	Unigene0002637(PDCD2);Unigene0018888(At2g20760);Unigene0027764(Os04g0679100);Unigene0030385(SPPL1)
GO:0070069	cytochrome complex	1	Unigene0014956(PP2AB2);Unigene0024258(petM);Unigene0030810(petM)
GO:0005761	mitochondrial ribosome	1	Unigene0005030(--);Unigene0007196(RPL5)
GO:0009376	HslUV protease complex	1	Unigene0003967(CLPX1);Unigene0004461(FIGL1);Unigene0016403(CDC48B);Unigene0018111(FTSH12);Unigene0025228(FTSHI2)
GO:0005776	autophagosome	1	Unigene0032434(tif34)
GO:0032588	trans-Golgi network membrane	1	Unigene0005615(CHER1)
GO:0009368	endopeptidase Clp complex	1	Unigene0002329(atad-3);Unigene0003967(CLPX1);Unigene0004461(FIGL1);Unigene0007078(SMXL3);Unigene0016403(CDC48B);Unigene0018111(FTSH12);Unigene0018791(LON2);Unigene0025228(FTSHI2);Unigene0025257(spast);Unigene0027781(SMXL6);Unigene0032436(At4g18820);Unigene0032719(CD4B)
GO:0000784	nuclear chromosome, telomeric region	1	Unigene0026243(At5g63670);Unigene0033439(--)
GO:0005634	nucleus	1	Unigene0000117(WRKY22);Unigene0000346(NUP98A);Unigene0000569(IPT5);Unigene0000589(NAA50);Unigene0000661(WRKY71);Unigene0000662(WRKY28);Unigene0000682(RECQL1);Unigene0000713(REV);Unigene0000786(At1g07660);Unigene0000901(Os04g0590900);Unigene0000915(ERF017);Unigene0000962(EIF4A1);Unigene0000984(CCT4);Unigene0001005(Solyc04g005320);Unigene0001210(naf1);Unigene0001222(TPR1);Unigene0001234(NAC075);Uni…
GO:0044433	cytoplasmic vesicle part	1	Unigene0000815(ENODL1);Unigene0002194(PAT22);Unigene0002637(PDCD2);Unigene0002869(CNGC18);Unigene0003160(CML5);Unigene0005615(CHER1);Unigene0006658(TMN2);Unigene0007124(LIP);Unigene0008045(DGD1);Unigene0008046(DGD1);Unigene0013510(VPS2.2);Unigene0016234(PRA1E);Unigene0016879(VAMP721);Unigene0017093(SPAC3H5.08c);Unigene0017944(FAB1A);Unigene0018888(At2g20760);Unigene0020143(At2g25060);Unigene00208…
GO:0022626	cytosolic ribosome	1	Unigene0000020(XI-F);Unigene0000508(RPL12);Unigene0000926(PDE338);Unigene0001487(rpl8);Unigene0001730(RPS9C);Unigene0001799(RPL7);Unigene0002467(UGT76B1);Unigene0002603(RPL13);Unigene0002615(RPL18);Unigene0002925(GDCST);Unigene0003258(RPL9);Unigene0003458(rplR);Unigene0004021(RPL21);Unigene0004440(RPS31);Unigene0004784(EMB3003);Unigene0005781(RPS17);Unigene0005840(rpl35);Unigene0006803(PLP6);Unig…
GO:0035770	ribonucleoprotein granule	1	Unigene0025532(GCL1);Unigene0025806(RBP47C);Unigene0034321(FLZ8);Unigene0034942(FLZ8)
GO:0036464	cytoplasmic ribonucleoprotein granule	1	Unigene0025532(GCL1);Unigene0025806(RBP47C);Unigene0034321(FLZ8);Unigene0034942(FLZ8)
GO:0071013	catalytic step 2 spliceosome	1	Unigene0024296(syf1);Unigene0035825(SKIPA)
GO:0019866	organelle inner membrane	1	Unigene0000726(CRD1);Unigene0000936(TIC20-V);Unigene0001456(TIM8);Unigene0002623(AOX1A);Unigene0002925(GDCST);Unigene0002998(UGT86A1);Unigene0003849(HCC2);Unigene0005402(TIC21);Unigene0005956(At5g42610);Unigene0009205(UGT9);Unigene0009623(ATPC);Unigene0011086(At5g15110);Unigene0012786(MIND1);Unigene0014421(MPC4);Unigene0016702(--);Unigene0016742(VHA-B2);Unigene0016904(WAV2);Unigene0016914(CYCL);U…
GO:0070469	respiratory chain	1	Unigene0002623(AOX1A);Unigene0002998(UGT86A1);Unigene0016504(ND4L);Unigene0016914(CYCL);Unigene0024838(MLO4);Unigene0025602(At2g44050);Unigene0030906(--)
GO:0016023	cytoplasmic, membrane-bounded vesicle	1	Unigene0000815(ENODL1);Unigene0000984(CCT4);Unigene0001435(IREG2);Unigene0002194(PAT22);Unigene0002637(PDCD2);Unigene0002869(CNGC18);Unigene0007124(LIP);Unigene0008045(DGD1);Unigene0008046(DGD1);Unigene0008941(At1g25240);Unigene0018888(At2g20760);Unigene0019619(ATL5);Unigene0020143(At2g25060);Unigene0020969(SYP125);Unigene0022881(MYOB1);Unigene0024675(HEMB1);Unigene0024997(DGD2);Unigene0025690(CY…
GO:0031410	cytoplasmic vesicle	1	Unigene0000815(ENODL1);Unigene0000984(CCT4);Unigene0001105(TPST);Unigene0001435(IREG2);Unigene0001581(SHR);Unigene0001911(At4g00750);Unigene0002194(PAT22);Unigene0002637(PDCD2);Unigene0002869(CNGC18);Unigene0003160(CML5);Unigene0003716(VHA-c''1);Unigene0004478(RAN1);Unigene0004497(RLP4);Unigene0004692(At5g03700);Unigene0005615(CHER1);Unigene0006581(At2g32450);Unigene0006647(COPT5.1);Unigene000665…
GO:0005623	cell	1	Unigene0000015(TUBB1);Unigene0000020(XI-F);Unigene0000027(ctps);Unigene0000074(PTI13);Unigene0000090(TOM7-1);Unigene0000117(WRKY22);Unigene0000129(CAC3);Unigene0000168(CNGC2);Unigene0000219(PME40);Unigene0000233(NPF8.3);Unigene0000263(AUR3);Unigene0000283(ABCG18);Unigene0000337(DVR);Unigene0000344(TUBB1);Unigene0000346(NUP98A);Unigene0000361(LRK10L-1.1);Unigene0000366(CHLP);Unigene0000386(ICS2);U…
;Unigene0028625(At4g11060);Unigene0028633(ABCG14);Unigene0028651(ADF7);Unigene0028660(SWEET2A);Unigene0028692(MAP3K12);Unigene0028703(IRK);Unigene0028711(polr1c);Unigene0028713(D6PKL1);Unigene0028727(--);Unigene0028731(RPS9);Unigene0028732(--);Unigene0028751(CRT3);Unigene0028781(NYC1);Unigene0028799(RPS24A);Unigene0028808(ERD4);Unigene0028828(ARF19);Unigene0028847(At1g21400);Unigene0028853(At4g34…
GO:0005798	Golgi-associated vesicle	1	Unigene0002637(PDCD2);Unigene0018888(At2g20760);Unigene0019619(ATL5);Unigene0027764(Os04g0679100);Unigene0030385(SPPL1)
GO:0005839	proteasome core complex	1	Unigene0004906(PAG1);Unigene0033952(BBR)
GO:0048500	signal recognition particle	1	Unigene0021784(R1A-10);Unigene0030345(FFC)
GO:0044798	nuclear transcription factor complex	1	Unigene0008176(At4g30825);Unigene0008225(--);Unigene0011370(RAX3);Unigene0013703(--)
GO:0044464	cell part	1	Unigene0000015(TUBB1);Unigene0000020(XI-F);Unigene0000027(ctps);Unigene0000074(PTI13);Unigene0000090(TOM7-1);Unigene0000117(WRKY22);Unigene0000129(CAC3);Unigene0000168(CNGC2);Unigene0000219(PME40);Unigene0000233(NPF8.3);Unigene0000263(AUR3);Unigene0000283(ABCG18);Unigene0000337(DVR);Unigene0000344(TUBB1);Unigene0000346(NUP98A);Unigene0000361(LRK10L-1.1);Unigene0000366(CHLP);Unigene0000386(ICS2);U…
1(ADF7);Unigene0028660(SWEET2A);Unigene0028692(MAP3K12);Unigene0028703(IRK);Unigene0028711(polr1c);Unigene0028713(D6PKL1);Unigene0028727(--);Unigene0028731(RPS9);Unigene0028732(--);Unigene0028751(CRT3);Unigene0028781(NYC1);Unigene0028799(RPS24A);Unigene0028808(ERD4);Unigene0028828(ARF19);Unigene0028847(At1g21400);Unigene0028853(At4g34220);Unigene0028871(ssx2ip-a);Unigene0028884(CPK19);Unigene0028…
GO:0030662	coated vesicle membrane	1	Unigene0002637(PDCD2);Unigene0018888(At2g20760);Unigene0027764(Os04g0679100);Unigene0030815(JKD);Unigene0030817(JKD)
GO:0042995	cell projection	1	Unigene0000263(AUR3);Unigene0000813(ncdn);Unigene0000984(CCT4);Unigene0003243(--);Unigene0008297(RALFL19);Unigene0008792(KLCR2);Unigene0011111(USP);Unigene0013149(MBP2C);Unigene0016742(VHA-B2);Unigene0016904(WAV2);Unigene0022353(NEDD1);Unigene0022847(MSSP2);Unigene0023474(CVA69.24);Unigene0023856(Zpr1);Unigene0024106(--);Unigene0024982(PPC6-7);Unigene0026689(--);Unigene0026884(--);Unigene0027296(…
GO:0000428	DNA-directed RNA polymerase complex	1	Unigene0000962(EIF4A1);Unigene0003007(--);Unigene0003318(POLA);Unigene0008176(At4g30825);Unigene0008225(--);Unigene0011370(RAX3);Unigene0011830(DCL4);Unigene0013703(--);Unigene0014841(RPOT1-TOM);Unigene0016283(--);Unigene0018057(AAPT1);Unigene0020754(NRPB1);Unigene0021610(At1g67320);Unigene0028711(polr1c);Unigene0029392(--);Unigene0030796(CSP41B);Unigene0031125(FLN2);Unigene0031916(RH3)
GO:0005684	U2-type spliceosomal complex	1	Unigene0017590(OsI_27673);Unigene0024296(syf1);Unigene0035825(SKIPA)
GO:0016607	nuclear speck	1	Unigene0005580(PHYA1);Unigene0005582(PHYA1);Unigene0010216(BAH1);Unigene0015722(SMC4);Unigene0027296(--);Unigene0029392(--);Unigene0030293(MIEL1);Unigene0032442(rexo4);Unigene0035825(SKIPA)
GO:0005753	mitochondrial proton-transporting ATP synthase complex	1	Unigene0009205(UGT9);Unigene0009623(ATPC);Unigene0011086(At5g15110);Unigene0016702(--);Unigene0016742(VHA-B2);Unigene0017059(--);Unigene0018232(ATPD);Unigene0023063(ATPG);Unigene0023155(--);Unigene0023474(CVA69.24)
GO:0031982	vesicle	1	Unigene0000815(ENODL1);Unigene0000984(CCT4);Unigene0001105(TPST);Unigene0001435(IREG2);Unigene0001581(SHR);Unigene0001911(At4g00750);Unigene0002194(PAT22);Unigene0002637(PDCD2);Unigene0002869(CNGC18);Unigene0003160(CML5);Unigene0003716(VHA-c''1);Unigene0004478(RAN1);Unigene0004497(RLP4);Unigene0004692(At5g03700);Unigene0005615(CHER1);Unigene0006581(At2g32450);Unigene0006647(COPT5.1);Unigene000665…
GO:0030880	RNA polymerase complex	1	Unigene0000962(EIF4A1);Unigene0003007(--);Unigene0003318(POLA);Unigene0008176(At4g30825);Unigene0008225(--);Unigene0008411(CAM-1);Unigene0011370(RAX3);Unigene0011830(DCL4);Unigene0013703(--);Unigene0014841(RPOT1-TOM);Unigene0016283(--);Unigene0018057(AAPT1);Unigene0018095(CAM-1);Unigene0020754(NRPB1);Unigene0021610(At1g67320);Unigene0028711(polr1c);Unigene0029392(--);Unigene0030796(CSP41B);Unigen…
GO:0031988	membrane-bounded vesicle	1	Unigene0000815(ENODL1);Unigene0000984(CCT4);Unigene0001435(IREG2);Unigene0002194(PAT22);Unigene0002637(PDCD2);Unigene0002869(CNGC18);Unigene0007124(LIP);Unigene0008045(DGD1);Unigene0008046(DGD1);Unigene0008941(At1g25240);Unigene0018888(At2g20760);Unigene0019619(ATL5);Unigene0020143(At2g25060);Unigene0020969(SYP125);Unigene0022881(MYOB1);Unigene0024675(HEMB1);Unigene0024997(DGD2);Unigene0025690(CY…
GO:0000502	proteasome complex	1	Unigene0002329(atad-3);Unigene0003967(CLPX1);Unigene0004461(FIGL1);Unigene0004906(PAG1);Unigene0014077(UGT90A1);Unigene0014416(At5g17760);Unigene0016403(CDC48B);Unigene0017256(At5g17760);Unigene0018111(FTSH12);Unigene0019997(At5g57480);Unigene0023607(ABCG39);Unigene0023849(AATP1);Unigene0023898(psmg2);Unigene0025098(PATL3);Unigene0025228(FTSHI2);Unigene0025257(spast);Unigene0032719(CD4B);Unigene0…
GO:0034708	methyltransferase complex	1	Unigene0017199(PIMT1)
GO:0055029	nuclear DNA-directed RNA polymerase complex	1	Unigene0000962(EIF4A1);Unigene0003007(--);Unigene0003318(POLA);Unigene0008176(At4g30825);Unigene0008225(--);Unigene0011370(RAX3);Unigene0011830(DCL4);Unigene0013703(--);Unigene0016283(--);Unigene0018057(AAPT1);Unigene0021610(At1g67320);Unigene0028711(polr1c);Unigene0029392(--);Unigene0031916(RH3)
GO:0098803	respiratory chain complex	1	Unigene0002998(UGT86A1);Unigene0024838(MLO4);Unigene0030906(--)
GO:0030135	coated vesicle	1	Unigene0002637(PDCD2);Unigene0008941(At1g25240);Unigene0018888(At2g20760);Unigene0027764(Os04g0679100);Unigene0030815(JKD);Unigene0030817(JKD);Unigene0036521(At4g40080)
GO:0030532	small nuclear ribonucleoprotein complex	1	Unigene0028558(At5g14050);Unigene0033186(GL3)
GO:0030117	membrane coat	1	Unigene0013385(CLASP);Unigene0018888(At2g20760);Unigene0022667(TOR1L3);Unigene0025066(CAS);Unigene0027764(Os04g0679100);Unigene0030219(--);Unigene0030778(Ipo5);Unigene0030815(JKD);Unigene0030817(JKD);Unigene0031743(UBC10);Unigene0031769(TRN1)
GO:0048475	coated membrane	1	Unigene0013385(CLASP);Unigene0018888(At2g20760);Unigene0022667(TOR1L3);Unigene0025066(CAS);Unigene0027764(Os04g0679100);Unigene0030219(--);Unigene0030778(Ipo5);Unigene0030815(JKD);Unigene0030817(JKD);Unigene0031743(UBC10);Unigene0031769(TRN1)
GO:0031597	cytosolic proteasome complex	1	Unigene0003967(CLPX1);Unigene0004461(FIGL1);Unigene0016403(CDC48B);Unigene0018111(FTSH12);Unigene0025228(FTSHI2)
GO:0000790	nuclear chromatin	1	Unigene0000786(At1g07660);Unigene0008553(ORTH2);Unigene0015722(SMC4);Unigene0016526(DPB2);Unigene0017575(RFC4);Unigene0017976(ORTH2);Unigene0017978(ORTH2);Unigene0022134(CTF7);Unigene0023670(RRP4);Unigene0024453(ARP4);Unigene0025823(HAG2);Unigene0026243(At5g63670);Unigene0029392(--);Unigene0031374(TAF14B);Unigene0031881(--)
GO:0044391	ribosomal subunit	1	Unigene0000020(XI-F);Unigene0000508(RPL12);Unigene0000926(PDE338);Unigene0001487(rpl8);Unigene0001730(RPS9C);Unigene0001799(RPL7);Unigene0002467(UGT76B1);Unigene0002603(RPL13);Unigene0002615(RPL18);Unigene0003258(RPL9);Unigene0003458(rplR);Unigene0004021(RPL21);Unigene0004440(RPS31);Unigene0005030(--);Unigene0005781(RPS17);Unigene0005840(rpl35);Unigene0006803(PLP6);Unigene0007196(RPL5);Unigene000…
GO:0016604	nuclear body	1	Unigene0000346(NUP98A);Unigene0005580(PHYA1);Unigene0005582(PHYA1);Unigene0009809(CRY2);Unigene0010216(BAH1);Unigene0015722(SMC4);Unigene0016283(--);Unigene0016526(DPB2);Unigene0017058(KIN10);Unigene0023856(Zpr1);Unigene0025453(COP1);Unigene0027296(--);Unigene0029392(--);Unigene0030293(MIEL1);Unigene0032442(rexo4);Unigene0033439(--);Unigene0035825(SKIPA)
GO:0016591	DNA-directed RNA polymerase II, holoenzyme	1	Unigene0008176(At4g30825);Unigene0008225(--);Unigene0011370(RAX3);Unigene0013703(--)
GO:0098800	inner mitochondrial membrane protein complex	1	Unigene0001456(TIM8);Unigene0002998(UGT86A1);Unigene0009205(UGT9);Unigene0009623(ATPC);Unigene0011086(At5g15110);Unigene0016702(--);Unigene0016742(VHA-B2);Unigene0017059(--);Unigene0017417(TIM21);Unigene0018232(ATPD);Unigene0023063(ATPG);Unigene0023155(--);Unigene0023297(ALS3);Unigene0023474(CVA69.24);Unigene0024838(MLO4);Unigene0030867(rnf170);Unigene0030906(--);Unigene0033742(TIM23-1)
GO:0097525	spliceosomal snRNP complex	1	Unigene0033186(GL3)
GO:0000785	chromatin	1	Unigene0000786(At1g07660);Unigene0003298(MCM2);Unigene0005601(DMT1);Unigene0005602(MET2);Unigene0008553(ORTH2);Unigene0011378(HMGB1);Unigene0013891(OsI_36121);Unigene0015722(SMC4);Unigene0016526(DPB2);Unigene0017575(RFC4);Unigene0017976(ORTH2);Unigene0017978(ORTH2);Unigene0022134(CTF7);Unigene0022255(At1g08170);Unigene0023670(RRP4);Unigene0024453(ARP4);Unigene0024510(DSCC1);Unigene0025823(HAG2);U…
GO:0005840	ribosome	1	Unigene0000020(XI-F);Unigene0000508(RPL12);Unigene0000926(PDE338);Unigene0001487(rpl8);Unigene0001730(RPS9C);Unigene0001799(RPL7);Unigene0001901(FAU);Unigene0001978(--);Unigene0001987(CSP41A);Unigene0002467(UGT76B1);Unigene0002603(RPL13);Unigene0002615(RPL18);Unigene0002925(GDCST);Unigene0003258(RPL9);Unigene0003277(RPL27);Unigene0003458(rplR);Unigene0003934(TUFA);Unigene0004021(RPL21);Unigene000…
GO:0044455	mitochondrial membrane part	1	Unigene0000090(TOM7-1);Unigene0000263(AUR3);Unigene0001456(TIM8);Unigene0002998(UGT86A1);Unigene0006512(TOM40-1);Unigene0009205(UGT9);Unigene0009623(ATPC);Unigene0011086(At5g15110);Unigene0016702(--);Unigene0016742(VHA-B2);Unigene0017059(--);Unigene0017417(TIM21);Unigene0018232(ATPD);Unigene0023063(ATPG);Unigene0023155(--);Unigene0023297(ALS3);Unigene0023474(CVA69.24);Unigene0024838(MLO4);Unigene…
GO:0031966	mitochondrial membrane	1	Unigene0000090(TOM7-1);Unigene0000263(AUR3);Unigene0000386(ICS2);Unigene0000565(YMF16);Unigene0001456(TIM8);Unigene0002623(AOX1A);Unigene0002925(GDCST);Unigene0002998(UGT86A1);Unigene0003849(HCC2);Unigene0005332(BHLH68);Unigene0005956(At5g42610);Unigene0006512(TOM40-1);Unigene0009205(UGT9);Unigene0009226(qtrt1);Unigene0009623(ATPC);Unigene0009836(CB5-A);Unigene0011086(At5g15110);Unigene0014421(MP…
GO:0043229	intracellular organelle	1	Unigene0000015(TUBB1);Unigene0000020(XI-F);Unigene0000090(TOM7-1);Unigene0000117(WRKY22);Unigene0000263(AUR3);Unigene0000337(DVR);Unigene0000344(TUBB1);Unigene0000346(NUP98A);Unigene0000366(CHLP);Unigene0000386(ICS2);Unigene0000400(PHYLLO);Unigene0000428(NQR);Unigene0000458(HEME1);Unigene0000494(--);Unigene0000496(FDH1);Unigene0000508(RPL12);Unigene0000533(BASS1);Unigene0000565(YMF16);Unigene0000…
nigene0036091(BZIP53);Unigene0036095(RBCMT);Unigene0036096(XI-K);Unigene0036097(CDP1);Unigene0036099(UGT89B2);Unigene0036173(NCL);Unigene0036195(RPS16);Unigene0036197(CIPK23);Unigene0036198(ATL72);Unigene0036200(ATL21B);Unigene0036201(RPL32A);Unigene0036243(GLTP3);Unigene0036245(IRX9H);Unigene0036302(At2g30020);Unigene0036306(--);Unigene0036324(TTL1);Unigene0036381(WRKY11);Unigene0036387(WRKY69);…
GO:0005743	mitochondrial inner membrane	1	Unigene0001456(TIM8);Unigene0002623(AOX1A);Unigene0002925(GDCST);Unigene0002998(UGT86A1);Unigene0003849(HCC2);Unigene0005956(At5g42610);Unigene0009205(UGT9);Unigene0009623(ATPC);Unigene0011086(At5g15110);Unigene0014421(MPC4);Unigene0016702(--);Unigene0016742(VHA-B2);Unigene0016914(CYCL);Unigene0017059(--);Unigene0017417(TIM21);Unigene0018106(EMB2750);Unigene0018232(ATPD);Unigene0019487(At5g64970)…
GO:0098798	mitochondrial protein complex	1	Unigene0000090(TOM7-1);Unigene0000263(AUR3);Unigene0001456(TIM8);Unigene0002998(UGT86A1);Unigene0003368(At5g09300);Unigene0006512(TOM40-1);Unigene0007196(RPL5);Unigene0009205(UGT9);Unigene0009623(ATPC);Unigene0011086(At5g15110);Unigene0014841(RPOT1-TOM);Unigene0016702(--);Unigene0016742(VHA-B2);Unigene0017059(--);Unigene0017417(TIM21);Unigene0018232(ATPD);Unigene0023063(ATPG);Unigene0023155(--);U…
GO:0005694	chromosome	1	Unigene0000682(RECQL1);Unigene0000786(At1g07660);Unigene0000962(EIF4A1);Unigene0000973(CURT1B);Unigene0001300(RECQL3);Unigene0001497(PTAC16);Unigene0001782(--);Unigene0003298(MCM2);Unigene0003318(POLA);Unigene0003324(--);Unigene0004461(FIGL1);Unigene0005601(DMT1);Unigene0005602(MET2);Unigene0008553(ORTH2);Unigene0008561(GINS1);Unigene0010694(--);Unigene0011378(HMGB1);Unigene0011830(DCL4);Unigene0…
GO:0043226	organelle	1	Unigene0000015(TUBB1);Unigene0000020(XI-F);Unigene0000090(TOM7-1);Unigene0000117(WRKY22);Unigene0000263(AUR3);Unigene0000337(DVR);Unigene0000344(TUBB1);Unigene0000346(NUP98A);Unigene0000366(CHLP);Unigene0000386(ICS2);Unigene0000400(PHYLLO);Unigene0000428(NQR);Unigene0000458(HEME1);Unigene0000494(--);Unigene0000496(FDH1);Unigene0000508(RPL12);Unigene0000533(BASS1);Unigene0000565(YMF16);Unigene0000…
0036013(PCMP-H17);Unigene0036015(PGD3);Unigene0036045(EFTS);Unigene0036065(LBD11);Unigene0036066(LBD11);Unigene0036091(BZIP53);Unigene0036095(RBCMT);Unigene0036096(XI-K);Unigene0036097(CDP1);Unigene0036099(UGT89B2);Unigene0036173(NCL);Unigene0036195(RPS16);Unigene0036197(CIPK23);Unigene0036198(ATL72);Unigene0036200(ATL21B);Unigene0036201(RPL32A);Unigene0036243(GLTP3);Unigene0036245(IRX9H);Unigene…
GO:0044445	cytosolic part	1	Unigene0000020(XI-F);Unigene0000508(RPL12);Unigene0000926(PDE338);Unigene0000984(CCT4);Unigene0001487(rpl8);Unigene0001730(RPS9C);Unigene0001799(RPL7);Unigene0002467(UGT76B1);Unigene0002603(RPL13);Unigene0002615(RPL18);Unigene0002925(GDCST);Unigene0003258(RPL9);Unigene0003368(At5g09300);Unigene0003458(rplR);Unigene0003967(CLPX1);Unigene0004021(RPL21);Unigene0004440(RPS31);Unigene0004461(FIGL1);Un…
GO:0005740	mitochondrial envelope	1	Unigene0000090(TOM7-1);Unigene0000263(AUR3);Unigene0000386(ICS2);Unigene0000565(YMF16);Unigene0001456(TIM8);Unigene0002623(AOX1A);Unigene0002925(GDCST);Unigene0002998(UGT86A1);Unigene0003849(HCC2);Unigene0005332(BHLH68);Unigene0005956(At5g42610);Unigene0006512(TOM40-1);Unigene0009205(UGT9);Unigene0009226(qtrt1);Unigene0009623(ATPC);Unigene0009836(CB5-A);Unigene0011086(At5g15110);Unigene0011656(NT…
GO:0000228	nuclear chromosome	1	Unigene0000786(At1g07660);Unigene0000962(EIF4A1);Unigene0003318(POLA);Unigene0004461(FIGL1);Unigene0008553(ORTH2);Unigene0008561(GINS1);Unigene0011830(DCL4);Unigene0014901(Nol6);Unigene0015026(ZAT9);Unigene0015722(SMC4);Unigene0016526(DPB2);Unigene0017575(RFC4);Unigene0017976(ORTH2);Unigene0017978(ORTH2);Unigene0021610(At1g67320);Unigene0022134(CTF7);Unigene0022313(TOP6A);Unigene0023670(RRP4);Uni…
GO:0044429	mitochondrial part	1	Unigene0000090(TOM7-1);Unigene0000263(AUR3);Unigene0000386(ICS2);Unigene0000565(YMF16);Unigene0001456(TIM8);Unigene0001820(ALDH7B4);Unigene0002049(At4g12130);Unigene0002114(dnaJ);Unigene0002623(AOX1A);Unigene0002925(GDCST);Unigene0002998(UGT86A1);Unigene0003324(--);Unigene0003368(At5g09300);Unigene0003849(HCC2);Unigene0004700(mrm1);Unigene0005030(--);Unigene0005332(BHLH68);Unigene0005725(AG118);U…
GO:0005681	spliceosomal complex	1	Unigene0017590(OsI_27673);Unigene0021638(HMGB2);Unigene0022942(--);Unigene0024296(syf1);Unigene0035825(SKIPA)
GO:0044454	nuclear chromosome part	1	Unigene0000786(At1g07660);Unigene0000962(EIF4A1);Unigene0003318(POLA);Unigene0008553(ORTH2);Unigene0008561(GINS1);Unigene0011830(DCL4);Unigene0015026(ZAT9);Unigene0015722(SMC4);Unigene0016526(DPB2);Unigene0017575(RFC4);Unigene0017976(ORTH2);Unigene0017978(ORTH2);Unigene0021610(At1g67320);Unigene0022134(CTF7);Unigene0023670(RRP4);Unigene0024106(--);Unigene0024453(ARP4);Unigene0025823(HAG2);Unigene…
GO:0044444	cytoplasmic part	1	Unigene0000020(XI-F);Unigene0000027(ctps);Unigene0000090(TOM7-1);Unigene0000129(CAC3);Unigene0000263(AUR3);Unigene0000337(DVR);Unigene0000346(NUP98A);Unigene0000366(CHLP);Unigene0000386(ICS2);Unigene0000400(PHYLLO);Unigene0000428(NQR);Unigene0000458(HEME1);Unigene0000494(--);Unigene0000496(FDH1);Unigene0000508(RPL12);Unigene0000533(BASS1);Unigene0000565(YMF16);Unigene0000569(IPT5);Unigene0000589(…
GO:0044427	chromosomal part	1	Unigene0000786(At1g07660);Unigene0000962(EIF4A1);Unigene0001782(--);Unigene0003298(MCM2);Unigene0003318(POLA);Unigene0005601(DMT1);Unigene0005602(MET2);Unigene0008553(ORTH2);Unigene0008561(GINS1);Unigene0010694(--);Unigene0011378(HMGB1);Unigene0011830(DCL4);Unigene0013385(CLASP);Unigene0013891(OsI_36121);Unigene0015026(ZAT9);Unigene0015722(SMC4);Unigene0016526(DPB2);Unigene0017058(KIN10);Unigene0…
GO:0005739	mitochondrion	1	Unigene0000090(TOM7-1);Unigene0000263(AUR3);Unigene0000386(ICS2);Unigene0000496(FDH1);Unigene0000565(YMF16);Unigene0000569(IPT5);Unigene0000700(At3g02650);Unigene0000822(At3g15140);Unigene0000865(PCMP-H89);Unigene0001456(TIM8);Unigene0001820(ALDH7B4);Unigene0002049(At4g12130);Unigene0002108(CYP98A2);Unigene0002114(dnaJ);Unigene0002323(VIT_05s0020g02800);Unigene0002594(P4H10);Unigene0002623(AOX1A)…
GO:0005829	cytosol	1	Unigene0000020(XI-F);Unigene0000263(AUR3);Unigene0000346(NUP98A);Unigene0000428(NQR);Unigene0000458(HEME1);Unigene0000496(FDH1);Unigene0000508(RPL12);Unigene0000589(NAA50);Unigene0000763(PMI15);Unigene0000786(At1g07660);Unigene0000813(ncdn);Unigene0000926(PDE338);Unigene0000984(CCT4);Unigene0001222(TPR1);Unigene0001259(CBF5);Unigene0001340(CP1);Unigene0001399(CSN1);Unigene0001435(IREG2);Unigene00…
GO:0005730	nucleolus	1	Unigene0000786(At1g07660);Unigene0001259(CBF5);Unigene0002615(RPL18);Unigene0005487(RAD4);Unigene0007640(MTR4);Unigene0012286(SKP1A);Unigene0013282(PED1);Unigene0014901(Nol6);Unigene0015410(GT-3B);Unigene0015922(nip7);Unigene0016283(--);Unigene0016733(RSL1D1);Unigene0016961(RPS18A);Unigene0017575(RFC4);Unigene0020048(nip7);Unigene0022815(RPL23);Unigene0022909(SWA1);Unigene0023338(RLP27);Unigene00…
GO:0044451	nucleoplasm part	1	Unigene0000346(NUP98A);Unigene0000786(At1g07660);Unigene0001477(TCX2);Unigene0001952(CFIS1);Unigene0002792(NEK6);Unigene0003007(--);Unigene0004324(DI19-1);Unigene0004411(CLF);Unigene0005347(At2g41170);Unigene0005580(PHYA1);Unigene0005582(PHYA1);Unigene0008176(At4g30825);Unigene0008225(--);Unigene0008561(GINS1);Unigene0009809(CRY2);Unigene0010172(HTR2);Unigene0010216(BAH1);Unigene0010524(FANCM);Un…
GO:0044446	intracellular organelle part	1	Unigene0000015(TUBB1);Unigene0000020(XI-F);Unigene0000090(TOM7-1);Unigene0000263(AUR3);Unigene0000337(DVR);Unigene0000344(TUBB1);Unigene0000346(NUP98A);Unigene0000386(ICS2);Unigene0000400(PHYLLO);Unigene0000428(NQR);Unigene0000458(HEME1);Unigene0000494(--);Unigene0000508(RPL12);Unigene0000533(BASS1);Unigene0000565(YMF16);Unigene0000569(IPT5);Unigene0000659(PPT2);Unigene0000726(CRD1);Unigene000078…
GO:0044422	organelle part	1	Unigene0000015(TUBB1);Unigene0000020(XI-F);Unigene0000090(TOM7-1);Unigene0000263(AUR3);Unigene0000337(DVR);Unigene0000344(TUBB1);Unigene0000346(NUP98A);Unigene0000386(ICS2);Unigene0000400(PHYLLO);Unigene0000428(NQR);Unigene0000458(HEME1);Unigene0000494(--);Unigene0000508(RPL12);Unigene0000533(BASS1);Unigene0000565(YMF16);Unigene0000569(IPT5);Unigene0000659(PPT2);Unigene0000726(CRD1);Unigene000078…
GO:0005622	intracellular	1	Unigene0000015(TUBB1);Unigene0000020(XI-F);Unigene0000027(ctps);Unigene0000090(TOM7-1);Unigene0000117(WRKY22);Unigene0000129(CAC3);Unigene0000168(CNGC2);Unigene0000263(AUR3);Unigene0000283(ABCG18);Unigene0000337(DVR);Unigene0000344(TUBB1);Unigene0000346(NUP98A);Unigene0000366(CHLP);Unigene0000386(ICS2);Unigene0000400(PHYLLO);Unigene0000428(NQR);Unigene0000445(ABCG11);Unigene0000458(HEME1);Unigene…
Unigene0031734(PAO);Unigene0031735(SODCP);Unigene0031736(SODCP);Unigene0031737(AP1);Unigene0031743(UBC10);Unigene0031746(GC1);Unigene0031769(TRN1);Unigene0031777(NCL);Unigene0031778(RPS6);Unigene0031782(GYRB);Unigene0031788(POPTRDRAFT_821063);Unigene0031804(PRT1);Unigene0031808(CLC-C);Unigene0031813(--);Unigene0031815(Os07g0190000);Unigene0031819(FIM2);Unigene0031828(--);Unigene0031832(MPK7);Unig…
GO:0005737	cytoplasm	1	Unigene0000015(TUBB1);Unigene0000020(XI-F);Unigene0000027(ctps);Unigene0000090(TOM7-1);Unigene0000129(CAC3);Unigene0000263(AUR3);Unigene0000337(DVR);Unigene0000344(TUBB1);Unigene0000346(NUP98A);Unigene0000366(CHLP);Unigene0000386(ICS2);Unigene0000400(PHYLLO);Unigene0000428(NQR);Unigene0000458(HEME1);Unigene0000494(--);Unigene0000496(FDH1);Unigene0000508(RPL12);Unigene0000533(BASS1);Unigene0000565…
GO:0044424	intracellular part	1	Unigene0000015(TUBB1);Unigene0000020(XI-F);Unigene0000027(ctps);Unigene0000090(TOM7-1);Unigene0000117(WRKY22);Unigene0000129(CAC3);Unigene0000263(AUR3);Unigene0000283(ABCG18);Unigene0000337(DVR);Unigene0000344(TUBB1);Unigene0000346(NUP98A);Unigene0000366(CHLP);Unigene0000386(ICS2);Unigene0000400(PHYLLO);Unigene0000428(NQR);Unigene0000445(ABCG11);Unigene0000458(HEME1);Unigene0000494(--);Unigene000…
31788(POPTRDRAFT_821063);Unigene0031804(PRT1);Unigene0031808(CLC-C);Unigene0031813(--);Unigene0031815(Os07g0190000);Unigene0031819(FIM2);Unigene0031828(--);Unigene0031832(MPK7);Unigene0031834(PPC4);Unigene0031859(--);Unigene0031874(RPL35);Unigene0031878(TKL-2);Unigene0031881(--);Unigene0031916(RH3);Unigene0031930(CSI3);Unigene0031943(FAB1B);Unigene0031960(TBL35);Unigene0031966(BCA1);Unigene003198…
GO:0030529	intracellular ribonucleoprotein complex	1	Unigene0000020(XI-F);Unigene0000508(RPL12);Unigene0000926(PDE338);Unigene0001210(naf1);Unigene0001259(CBF5);Unigene0001487(rpl8);Unigene0001730(RPS9C);Unigene0001799(RPL7);Unigene0001901(FAU);Unigene0001978(--);Unigene0001987(CSP41A);Unigene0002467(UGT76B1);Unigene0002603(RPL13);Unigene0002615(RPL18);Unigene0002925(GDCST);Unigene0003258(RPL9);Unigene0003277(RPL27);Unigene0003458(rplR);Unigene0003…
GO:1990904	ribonucleoprotein complex	1	Unigene0000020(XI-F);Unigene0000346(NUP98A);Unigene0000508(RPL12);Unigene0000926(PDE338);Unigene0001210(naf1);Unigene0001259(CBF5);Unigene0001487(rpl8);Unigene0001730(RPS9C);Unigene0001799(RPL7);Unigene0001901(FAU);Unigene0001978(--);Unigene0001987(CSP41A);Unigene0002467(UGT76B1);Unigene0002603(RPL13);Unigene0002615(RPL18);Unigene0002925(GDCST);Unigene0003258(RPL9);Unigene0003277(RPL27);Unigene00…
GO:0005575	cellular_component	1	Unigene0000015(TUBB1);Unigene0000020(XI-F);Unigene0000022(CESA2);Unigene0000027(ctps);Unigene0000037(GASA10);Unigene0000074(PTI13);Unigene0000083(RPP13L3);Unigene0000090(TOM7-1);Unigene0000095(--);Unigene0000117(WRKY22);Unigene0000129(CAC3);Unigene0000151(LON1);Unigene0000168(CNGC2);Unigene0000219(PME40);Unigene0000226(HMA4);Unigene0000231(R1A-10);Unigene0000233(NPF8.3);Unigene0000263(AUR3);Unige…
gene0024938(At1g13580);Unigene0024982(PPC6-7);Unigene0024992(MYB73);Unigene0024997(DGD2);Unigene0025023(RPL17B);Unigene0025047(UPTG1);Unigene0025048(GLCAT14A);Unigene0025057(CGL160);Unigene0025065(MYB124);Unigene0025066(CAS);Unigene0025081(DGAT3);Unigene0025092(FBN5);Unigene0025094(GAE1);Unigene0025097(TCP13);Unigene0025098(PATL3);Unigene0025100(PATL3);Unigene0025108(MYB330);Unigene0025109(MYB330…
GO:0032991	macromolecular complex	1	Unigene0000020(XI-F);Unigene0000027(ctps);Unigene0000090(TOM7-1);Unigene0000129(CAC3);Unigene0000226(HMA4);Unigene0000263(AUR3);Unigene0000283(ABCG18);Unigene0000346(NUP98A);Unigene0000366(CHLP);Unigene0000400(PHYLLO);Unigene0000445(ABCG11);Unigene0000508(RPL12);Unigene0000565(YMF16);Unigene0000625(ZDS);Unigene0000682(RECQL1);Unigene0000781(ABCG32);Unigene0000786(At1g07660);Unigene0000806(IPT1);U…
GO:0043234	protein complex	1	Unigene0000020(XI-F);Unigene0000027(ctps);Unigene0000090(TOM7-1);Unigene0000129(CAC3);Unigene0000226(HMA4);Unigene0000263(AUR3);Unigene0000283(ABCG18);Unigene0000346(NUP98A);Unigene0000366(CHLP);Unigene0000400(PHYLLO);Unigene0000445(ABCG11);Unigene0000565(YMF16);Unigene0000625(ZDS);Unigene0000682(RECQL1);Unigene0000781(ABCG32);Unigene0000786(At1g07660);Unigene0000806(IPT1);Unigene0000849(ABCB4);U…
GO:0043228	non-membrane-bounded organelle	1	Unigene0000015(TUBB1);Unigene0000020(XI-F);Unigene0000344(TUBB1);Unigene0000508(RPL12);Unigene0000682(RECQL1);Unigene0000786(At1g07660);Unigene0000926(PDE338);Unigene0000962(EIF4A1);Unigene0000973(CURT1B);Unigene0000984(CCT4);Unigene0001259(CBF5);Unigene0001300(RECQL3);Unigene0001487(rpl8);Unigene0001497(PTAC16);Unigene0001644(PSBQ2);Unigene0001730(RPS9C);Unigene0001772(DIM);Unigene0001782(--);Un…
GO:0043232	intracellular non-membrane-bounded organelle	1	Unigene0000015(TUBB1);Unigene0000020(XI-F);Unigene0000344(TUBB1);Unigene0000508(RPL12);Unigene0000682(RECQL1);Unigene0000786(At1g07660);Unigene0000926(PDE338);Unigene0000962(EIF4A1);Unigene0000973(CURT1B);Unigene0000984(CCT4);Unigene0001259(CBF5);Unigene0001300(RECQL3);Unigene0001487(rpl8);Unigene0001497(PTAC16);Unigene0001644(PSBQ2);Unigene0001730(RPS9C);Unigene0001772(DIM);Unigene0001782(--);Un…
GO:0044428	nuclear part	1	Unigene0000346(NUP98A);Unigene0000569(IPT5);Unigene0000786(At1g07660);Unigene0000901(Os04g0590900);Unigene0000962(EIF4A1);Unigene0000984(CCT4);Unigene0001210(naf1);Unigene0001259(CBF5);Unigene0001399(CSN1);Unigene0001406(WAV3);Unigene0001435(IREG2);Unigene0001477(TCX2);Unigene0001532(SIS3);Unigene0001952(CFIS1);Unigene0002072(ATL6);Unigene0002615(RPL18);Unigene0002690(ATL46);Unigene0002792(NEK6);…
GO:0031974	membrane-enclosed lumen	1	Unigene0000346(NUP98A);Unigene0000786(At1g07660);Unigene0000962(EIF4A1);Unigene0000984(CCT4);Unigene0001210(naf1);Unigene0001259(CBF5);Unigene0001435(IREG2);Unigene0001456(TIM8);Unigene0001477(TCX2);Unigene0001820(ALDH7B4);Unigene0001952(CFIS1);Unigene0002049(At4g12130);Unigene0002088(ERDJ3A);Unigene0002114(dnaJ);Unigene0002594(P4H10);Unigene0002615(RPL18);Unigene0002792(NEK6);Unigene0002925(GDCS…
GO:0043233	organelle lumen	1	Unigene0000346(NUP98A);Unigene0000786(At1g07660);Unigene0000962(EIF4A1);Unigene0000984(CCT4);Unigene0001210(naf1);Unigene0001259(CBF5);Unigene0001435(IREG2);Unigene0001456(TIM8);Unigene0001477(TCX2);Unigene0001820(ALDH7B4);Unigene0001952(CFIS1);Unigene0002049(At4g12130);Unigene0002088(ERDJ3A);Unigene0002114(dnaJ);Unigene0002594(P4H10);Unigene0002615(RPL18);Unigene0002792(NEK6);Unigene0002925(GDCS…
GO:0070013	intracellular organelle lumen	1	Unigene0000346(NUP98A);Unigene0000786(At1g07660);Unigene0000962(EIF4A1);Unigene0000984(CCT4);Unigene0001210(naf1);Unigene0001259(CBF5);Unigene0001435(IREG2);Unigene0001456(TIM8);Unigene0001477(TCX2);Unigene0001820(ALDH7B4);Unigene0001952(CFIS1);Unigene0002049(At4g12130);Unigene0002088(ERDJ3A);Unigene0002114(dnaJ);Unigene0002594(P4H10);Unigene0002615(RPL18);Unigene0002792(NEK6);Unigene0002925(GDCS…
GO:0031981	nuclear lumen	1	Unigene0000346(NUP98A);Unigene0000786(At1g07660);Unigene0000962(EIF4A1);Unigene0000984(CCT4);Unigene0001210(naf1);Unigene0001259(CBF5);Unigene0001435(IREG2);Unigene0001477(TCX2);Unigene0001952(CFIS1);Unigene0002615(RPL18);Unigene0002792(NEK6);Unigene0002925(GDCST);Unigene0003007(--);Unigene0003318(POLA);Unigene0004306(MYH);Unigene0004324(DI19-1);Unigene0004411(CLF);Unigene0004461(FIGL1);Unigene00…
GO:0005654	nucleoplasm	1	Unigene0000346(NUP98A);Unigene0000786(At1g07660);Unigene0000984(CCT4);Unigene0001210(naf1);Unigene0001435(IREG2);Unigene0001477(TCX2);Unigene0001952(CFIS1);Unigene0002792(NEK6);Unigene0002925(GDCST);Unigene0003007(--);Unigene0004306(MYH);Unigene0004324(DI19-1);Unigene0004411(CLF);Unigene0005347(At2g41170);Unigene0005487(RAD4);Unigene0005580(PHYA1);Unigene0005582(PHYA1);Unigene0005601(DMT1);Unigen…
Molecular Function
GO:0004672	protein kinase activity	3.26614e-13	Unigene0000008(CRK5);Unigene0000020(XI-F);Unigene0000023(At5g35370);Unigene0000029(At1g56140);Unigene0000030(At1g56140);Unigene0000074(PTI13);Unigene0000168(CNGC2);Unigene0000263(AUR3);Unigene0000361(LRK10L-1.1);Unigene0000474(At4g23740);Unigene0000499(PHYB);Unigene0000577(At4g39110);Unigene0000585(At1g17230);Unigene0000632(RLK7);Unigene0000633(WAK2);Unigene0000635(WAK2);Unigene0000651(ALE2);Unig…
GO:0016740	transferase activity	1.44587e-12	Unigene0000008(CRK5);Unigene0000020(XI-F);Unigene0000022(CESA2);Unigene0000023(At5g35370);Unigene0000027(ctps);Unigene0000029(At1g56140);Unigene0000030(At1g56140);Unigene0000074(PTI13);Unigene0000083(RPP13L3);Unigene0000168(CNGC2);Unigene0000219(PME40);Unigene0000263(AUR3);Unigene0000288(A1);Unigene0000325(UGT94E5);Unigene0000360(UGT29);Unigene0000361(LRK10L-1.1);Unigene0000365(FAR2);Unigene00004…
GO:0016773	phosphotransferase activity, alcohol group as acceptor	3.4994e-09	Unigene0000008(CRK5);Unigene0000020(XI-F);Unigene0000023(At5g35370);Unigene0000029(At1g56140);Unigene0000030(At1g56140);Unigene0000074(PTI13);Unigene0000083(RPP13L3);Unigene0000168(CNGC2);Unigene0000263(AUR3);Unigene0000361(LRK10L-1.1);Unigene0000474(At4g23740);Unigene0000499(PHYB);Unigene0000577(At4g39110);Unigene0000585(At1g17230);Unigene0000632(RLK7);Unigene0000633(WAK2);Unigene0000635(WAK2);U…
GO:0001071	nucleic acid binding transcription factor activity	3.4994e-09	Unigene0000117(WRKY22);Unigene0000218(BZIP53);Unigene0000569(IPT5);Unigene0000661(WRKY71);Unigene0000662(WRKY28);Unigene0000713(REV);Unigene0000915(ERF017);Unigene0001005(Solyc04g005320);Unigene0001143(XPB1);Unigene0001234(NAC075);Unigene0001268(WRKY24);Unigene0001329(ABF2);Unigene0001530(ABF2);Unigene0001581(SHR);Unigene0002099(Os01g0871200);Unigene0002106(BZIP34);Unigene0002136(ZAT5);Unigene000…
GO:0003700	transcription factor activity, sequence-specific DNA binding	3.69365e-09	Unigene0000117(WRKY22);Unigene0000218(BZIP53);Unigene0000569(IPT5);Unigene0000661(WRKY71);Unigene0000662(WRKY28);Unigene0000713(REV);Unigene0000915(ERF017);Unigene0001005(Solyc04g005320);Unigene0001143(XPB1);Unigene0001234(NAC075);Unigene0001268(WRKY24);Unigene0001329(ABF2);Unigene0001530(ABF2);Unigene0001581(SHR);Unigene0002099(Os01g0871200);Unigene0002106(BZIP34);Unigene0002136(ZAT5);Unigene000…
GO:0016301	kinase activity	1.71846e-08	Unigene0000008(CRK5);Unigene0000020(XI-F);Unigene0000023(At5g35370);Unigene0000029(At1g56140);Unigene0000030(At1g56140);Unigene0000074(PTI13);Unigene0000083(RPP13L3);Unigene0000168(CNGC2);Unigene0000263(AUR3);Unigene0000361(LRK10L-1.1);Unigene0000415(--);Unigene0000474(At4g23740);Unigene0000499(PHYB);Unigene0000577(At4g39110);Unigene0000585(At1g17230);Unigene0000632(RLK7);Unigene0000633(WAK2);Uni…
GO:0016798	hydrolase activity, acting on glycosyl bonds	5.35449e-08	Unigene0000225(BACOVA_02659);Unigene0000546(G9);Unigene0000866(BGAL10);Unigene0000867(BGAL8);Unigene0001082(AGAL1);Unigene0001245(At1g28390);Unigene0001340(CP1);Unigene0001586(plaa2);Unigene0001906(BACOVA_02659);Unigene0001979(At1g48930);Unigene0001988(CML18);Unigene0002197(At4g34480);Unigene0002859(BACOVA_02659);Unigene0003001(At1g64390);Unigene0003160(CML5);Unigene0003407(At2g43860);Unigene0003…
GO:0016705	oxidoreductase activity, acting on paired donors, with incorporation or reduction of molecular oxygen	2.35753e-07	Unigene0000347(CYP76B6);Unigene0000366(CHLP);Unigene0000520(ABC1K7);Unigene0000726(CRD1);Unigene0000797(CYP82C3);Unigene0001038(CYP82C2);Unigene0001825(CYP707A2);Unigene0001826(CYP707A2);Unigene0001975(CYP81Q32);Unigene0002108(CYP98A2);Unigene0002594(P4H10);Unigene0002828(At4g11690);Unigene0003354(SRG1);Unigene0003428(ACPD);Unigene0003731(CYP94A2);Unigene0003926(CYP85A1);Unigene0003927(CYP85A1);U…
GO:0004553	hydrolase activity, hydrolyzing O-glycosyl compounds	3.15866e-07	Unigene0000225(BACOVA_02659);Unigene0000546(G9);Unigene0000866(BGAL10);Unigene0000867(BGAL8);Unigene0001082(AGAL1);Unigene0001340(CP1);Unigene0001586(plaa2);Unigene0001906(BACOVA_02659);Unigene0001979(At1g48930);Unigene0001988(CML18);Unigene0002197(At4g34480);Unigene0002859(BACOVA_02659);Unigene0003001(At1g64390);Unigene0003160(CML5);Unigene0003407(At2g43860);Unigene0003897(CML25);Unigene0004077(…
GO:0030246	carbohydrate binding	3.27864e-07	Unigene0000361(LRK10L-1.1);Unigene0000633(WAK2);Unigene0000635(WAK2);Unigene0000866(BGAL10);Unigene0000867(BGAL8);Unigene0001831(ATL20);Unigene0001923(LECRK91);Unigene0001979(At1g48930);Unigene0002197(At4g34480);Unigene0002284(--);Unigene0002309(--);Unigene0002386(LRK10L-2.5);Unigene0002594(P4H10);Unigene0003001(At1g64390);Unigene0003063(GALM);Unigene0003761(--);Unigene0003853(FKFBP);Unigene00039…
GO:0046906	tetrapyrrole binding	4.47546e-07	Unigene0000347(CYP76B6);Unigene0000797(CYP82C3);Unigene0000804(PER27);Unigene0001038(CYP82C2);Unigene0001825(CYP707A2);Unigene0001826(CYP707A2);Unigene0001975(CYP81Q32);Unigene0002108(CYP98A2);Unigene0002326(PER51);Unigene0003731(CYP94A2);Unigene0003926(CYP85A1);Unigene0003927(CYP85A1);Unigene0004100(HSPRO2);Unigene0004102(HSPRO2);Unigene0004138(PER17);Unigene0004189(CYP704C1);Unigene0004312(AOS3…
GO:0020037	heme binding	5.63079e-07	Unigene0000347(CYP76B6);Unigene0000797(CYP82C3);Unigene0000804(PER27);Unigene0001038(CYP82C2);Unigene0001825(CYP707A2);Unigene0001826(CYP707A2);Unigene0001975(CYP81Q32);Unigene0002108(CYP98A2);Unigene0002326(PER51);Unigene0003731(CYP94A2);Unigene0003926(CYP85A1);Unigene0003927(CYP85A1);Unigene0004100(HSPRO2);Unigene0004102(HSPRO2);Unigene0004138(PER17);Unigene0004189(CYP704C1);Unigene0004312(AOS3…
GO:1904680	peptide transmembrane transporter activity	5.44812e-06	Unigene0000233(NPF8.3);Unigene0000283(ABCG18);Unigene0000445(ABCG11);Unigene0000565(YMF16);Unigene0000781(ABCG32);Unigene0000849(ABCB4);Unigene0001137(NPF6.2);Unigene0001138(NPF6.3);Unigene0001139(NPF6.3);Unigene0001456(TIM8);Unigene0002164(At1g76070);Unigene0005148(ABCG15);Unigene0005488(SECE1);Unigene0006397(NPF5.1);Unigene0006575(ABCG11);Unigene0007936(ABCG11);Unigene0008246(ABCG36);Unigene000…
GO:0016757	transferase activity, transferring glycosyl groups	5.91354e-06	Unigene0000022(CESA2);Unigene0000027(ctps);Unigene0000288(A1);Unigene0000325(UGT94E5);Unigene0000360(UGT29);Unigene0000361(LRK10L-1.1);Unigene0000365(FAR2);Unigene0000638(GOLS1);Unigene0000816(UGT29);Unigene0000821(UGT79B6);Unigene0000861(UGT74E2);Unigene0001118(HCF244);Unigene0001171(CSLD2);Unigene0001172(CSLD3);Unigene0001276(UXS5);Unigene0001497(PTAC16);Unigene0001551(CSLC5);Unigene0001572(UGT…
GO:0015333	peptide:proton symporter activity	8.90091e-06	Unigene0000233(NPF8.3);Unigene0001137(NPF6.2);Unigene0001138(NPF6.3);Unigene0001139(NPF6.3);Unigene0006397(NPF5.1);Unigene0011641(NPF8.1);Unigene0011912(NPF2.13);Unigene0012663(NPF5.2);Unigene0015391(NPF5.10);Unigene0017556(NPF2.10);Unigene0019290(NPF1.2);Unigene0024032(NPF3.1);Unigene0024321(NPF7.3);Unigene0026596(NPF2.6);Unigene0029132(NPF4.6);Unigene0029270(CTR1);Unigene0029305(NPF4.3);Unigene…
GO:0022897	proton-dependent peptide secondary active transmembrane transporter activity	8.90091e-06	Unigene0000233(NPF8.3);Unigene0001137(NPF6.2);Unigene0001138(NPF6.3);Unigene0001139(NPF6.3);Unigene0006397(NPF5.1);Unigene0011641(NPF8.1);Unigene0011912(NPF2.13);Unigene0012663(NPF5.2);Unigene0015391(NPF5.10);Unigene0017556(NPF2.10);Unigene0019290(NPF1.2);Unigene0024032(NPF3.1);Unigene0024321(NPF7.3);Unigene0026596(NPF2.6);Unigene0029132(NPF4.6);Unigene0029270(CTR1);Unigene0029305(NPF4.3);Unigene…
GO:0015197	peptide transporter activity	1.72189e-05	Unigene0000233(NPF8.3);Unigene0000283(ABCG18);Unigene0000445(ABCG11);Unigene0000565(YMF16);Unigene0000781(ABCG32);Unigene0000849(ABCB4);Unigene0001137(NPF6.2);Unigene0001138(NPF6.3);Unigene0001139(NPF6.3);Unigene0001270(OPT1);Unigene0001456(TIM8);Unigene0002164(At1g76070);Unigene0005148(ABCG15);Unigene0005488(SECE1);Unigene0006397(NPF5.1);Unigene0006575(ABCG11);Unigene0007936(ABCG11);Unigene00082…
GO:0005506	iron ion binding	2.01088e-05	Unigene0000347(CYP76B6);Unigene0000759(RAM2);Unigene0000797(CYP82C3);Unigene0001038(CYP82C2);Unigene0001538(At3g21360);Unigene0001825(CYP707A2);Unigene0001826(CYP707A2);Unigene0001975(CYP81Q32);Unigene0002108(CYP98A2);Unigene0002594(P4H10);Unigene0003731(CYP94A2);Unigene0003926(CYP85A1);Unigene0003927(CYP85A1);Unigene0004189(CYP704C1);Unigene0004312(AOS3);Unigene0005164(CYP76B6);Unigene0005314(CY…
GO:0008194	UDP-glycosyltransferase activity	2.52068e-05	Unigene0000022(CESA2);Unigene0000325(UGT94E5);Unigene0000360(UGT29);Unigene0000821(UGT79B6);Unigene0000861(UGT74E2);Unigene0001171(CSLD2);Unigene0001172(CSLD3);Unigene0001551(CSLC5);Unigene0001572(UGT94E5);Unigene0002183(ZOX1);Unigene0002467(UGT76B1);Unigene0002696(CSLA2);Unigene0002985(GATL7);Unigene0002998(UGT86A1);Unigene0003953(UGT74E2);Unigene0004006(CALS5);Unigene0004161(UGT73D1);Unigene000…
GO:0042887	amide transmembrane transporter activity	2.92401e-05	Unigene0000233(NPF8.3);Unigene0000283(ABCG18);Unigene0000445(ABCG11);Unigene0000565(YMF16);Unigene0000781(ABCG32);Unigene0000849(ABCB4);Unigene0001137(NPF6.2);Unigene0001138(NPF6.3);Unigene0001139(NPF6.3);Unigene0001456(TIM8);Unigene0002164(At1g76070);Unigene0003574(TIP1-1);Unigene0005148(ABCG15);Unigene0005488(SECE1);Unigene0006397(NPF5.1);Unigene0006575(ABCG11);Unigene0007936(ABCG11);Unigene000…
GO:0015294	solute:cation symporter activity	3.3601e-05	Unigene0000233(NPF8.3);Unigene0000533(BASS1);Unigene0001137(NPF6.2);Unigene0001138(NPF6.3);Unigene0001139(NPF6.3);Unigene0001160(STP14);Unigene0001541(SUC1);Unigene0002307(--);Unigene0002879(BASS2);Unigene0006397(NPF5.1);Unigene0006412(CLC-A);Unigene0008125(--);Unigene0011619(PLT5);Unigene0011641(NPF8.1);Unigene0011642(NPF5.5);Unigene0011854(PLT6);Unigene0011912(NPF2.13);Unigene0012167(At1g31830)…
GO:0016772	transferase activity, transferring phosphorus-containing groups	3.54055e-05	Unigene0000008(CRK5);Unigene0000020(XI-F);Unigene0000023(At5g35370);Unigene0000029(At1g56140);Unigene0000030(At1g56140);Unigene0000074(PTI13);Unigene0000083(RPP13L3);Unigene0000168(CNGC2);Unigene0000263(AUR3);Unigene0000361(LRK10L-1.1);Unigene0000415(--);Unigene0000474(At4g23740);Unigene0000499(PHYB);Unigene0000565(YMF16);Unigene0000577(At4g39110);Unigene0000585(At1g17230);Unigene0000616(AAE17);U…
GO:0015925	galactosidase activity	3.54055e-05	Unigene0000866(BGAL10);Unigene0000867(BGAL8);Unigene0004377(MAN2);Unigene0004903(BGAL3);Unigene0014189(lacZ);Unigene0019007(HEN1);Unigene0019584(BGAL3);Unigene0022336(BGLU44);Unigene0024470(BGAL1);Unigene0024741(BGAL8);Unigene0025136(exgA);Unigene0025515(BGLU40);Unigene0026818(BGAL1);Unigene0026820(BGAL1);Unigene0027323(BGAL3);Unigene0029271(AGAL3);Unigene0029272(AGAL3);Unigene0034180(BGLU16);Uni…
GO:0015295	solute:proton symporter activity	5.98908e-05	Unigene0000233(NPF8.3);Unigene0001137(NPF6.2);Unigene0001138(NPF6.3);Unigene0001139(NPF6.3);Unigene0001160(STP14);Unigene0001541(SUC1);Unigene0006397(NPF5.1);Unigene0006412(CLC-A);Unigene0011619(PLT5);Unigene0011641(NPF8.1);Unigene0011642(NPF5.5);Unigene0011854(PLT6);Unigene0011912(NPF2.13);Unigene0012167(At1g31830);Unigene0012663(NPF5.2);Unigene0014102(OCT7);Unigene0015391(NPF5.10);Unigene001709…
GO:0015293	symporter activity	8.49342e-05	Unigene0000233(NPF8.3);Unigene0000533(BASS1);Unigene0001137(NPF6.2);Unigene0001138(NPF6.3);Unigene0001139(NPF6.3);Unigene0001160(STP14);Unigene0001541(SUC1);Unigene0002307(--);Unigene0002879(BASS2);Unigene0003488(STC);Unigene0003845(--);Unigene0006397(NPF5.1);Unigene0006412(CLC-A);Unigene0008125(--);Unigene0011619(PLT5);Unigene0011641(NPF8.1);Unigene0011642(NPF5.5);Unigene0011854(PLT6);Unigene001…
GO:0016758	transferase activity, transferring hexosyl groups	0.000112029	Unigene0000022(CESA2);Unigene0000325(UGT94E5);Unigene0000821(UGT79B6);Unigene0000861(UGT74E2);Unigene0001171(CSLD2);Unigene0001172(CSLD3);Unigene0001551(CSLC5);Unigene0001572(UGT94E5);Unigene0001924(PMEI7);Unigene0002183(ZOX1);Unigene0002261(PHS1);Unigene0002467(UGT76B1);Unigene0002696(CSLA2);Unigene0002985(GATL7);Unigene0003953(UGT74E2);Unigene0004006(CALS5);Unigene0004161(UGT73D1);Unigene000416…
GO:0004565	beta-galactosidase activity	0.00014333	Unigene0000866(BGAL10);Unigene0000867(BGAL8);Unigene0004377(MAN2);Unigene0004903(BGAL3);Unigene0014189(lacZ);Unigene0019007(HEN1);Unigene0019584(BGAL3);Unigene0022336(BGLU44);Unigene0024470(BGAL1);Unigene0024741(BGAL8);Unigene0025136(exgA);Unigene0025515(BGLU40);Unigene0026818(BGAL1);Unigene0026820(BGAL1);Unigene0027323(BGAL3);Unigene0034180(BGLU16);Unigene0034676(BGLU11);Unigene0036383(RG)
GO:0015267	channel activity	0.000217902	Unigene0000095(--);Unigene0000168(CNGC2);Unigene0000445(ABCG11);Unigene0000781(ABCG32);Unigene0000849(ABCB4);Unigene0001435(IREG2);Unigene0002869(CNGC18);Unigene0003514(GLR3.4);Unigene0003574(TIP1-1);Unigene0003720(--);Unigene0003821(AKT1);Unigene0004535(SPS1);Unigene0005005(TIP2-1);Unigene0005956(At5g42610);Unigene0006411(CLC-B);Unigene0006412(CLC-A);Unigene0006575(ABCG11);Unigene0006919(GLR3.3)…
GO:0022803	passive transmembrane transporter activity	0.000217902	Unigene0000095(--);Unigene0000168(CNGC2);Unigene0000445(ABCG11);Unigene0000781(ABCG32);Unigene0000849(ABCB4);Unigene0001435(IREG2);Unigene0002869(CNGC18);Unigene0003514(GLR3.4);Unigene0003574(TIP1-1);Unigene0003720(--);Unigene0003821(AKT1);Unigene0004535(SPS1);Unigene0005005(TIP2-1);Unigene0005956(At5g42610);Unigene0006411(CLC-B);Unigene0006412(CLC-A);Unigene0006575(ABCG11);Unigene0006919(GLR3.3)…
GO:0045340	mercury ion binding	0.000293217	Unigene0001373(HIPP28);Unigene0001571(HMA5);Unigene0002337(HIPP09);Unigene0004478(RAN1);Unigene0004957(HMA4);Unigene0005268(HIPP44);Unigene0008313(NAKR2);Unigene0009472(HIPP44);Unigene0014280(HIPP32);Unigene0017463(HIPP07);Unigene0020849(NAKR1);Unigene0020878(HIPP32);Unigene0025128(PAA2);Unigene0027298(HIPP26);Unigene0027299(HIPP26);Unigene0032799(HIPP37);Unigene0032904(HIPP06);Unigene0033200(HIP…
GO:0004497	monooxygenase activity	0.00115808	Unigene0000366(CHLP);Unigene0000520(ABC1K7);Unigene0000726(CRD1);Unigene0000797(CYP82C3);Unigene0001038(CYP82C2);Unigene0002108(CYP98A2);Unigene0002623(AOX1A);Unigene0002828(At4g11690);Unigene0003927(CYP85A1);Unigene0004189(CYP704C1);Unigene0004454(SQE1);Unigene0005314(CYP710A11);Unigene0005561(CIPK6);Unigene0005562(CIPK6);Unigene0005978(GLO1);Unigene0005979(GLO2);Unigene0005980(GLO1);Unigene0006…
GO:0016701	oxidoreductase activity, acting on single donors with incorporation of molecular oxygen	0.00136011	Unigene0000366(CHLP);Unigene0000759(RAM2);Unigene0002302(HPD);Unigene0002594(P4H10);Unigene0002838(LOX1.5);Unigene0003503(At2g24580);Unigene0003504(At2g24580);Unigene0004102(HSPRO2);Unigene0005978(GLO1);Unigene0005979(GLO2);Unigene0005980(GLO1);Unigene0006489(At5g41840);Unigene0007008(WSD1);Unigene0007680(ABP19A);Unigene0009718(GLO5);Unigene0010598(MIOX2);Unigene0010804(--);Unigene0010881(NCED2);…
GO:0015103	inorganic anion transmembrane transporter activity	0.00149411	Unigene0000168(CNGC2);Unigene0000283(ABCG18);Unigene0000445(ABCG11);Unigene0000659(PPT2);Unigene0000781(ABCG32);Unigene0000849(ABCB4);Unigene0001160(STP14);Unigene0001434(MOT2);Unigene0001435(IREG2);Unigene0001456(TIM8);Unigene0001541(SUC1);Unigene0002869(CNGC18);Unigene0002879(BASS2);Unigene0003272(SULTR3;4);Unigene0003273(SULTR3;4);Unigene0003574(TIP1-1);Unigene0003716(VHA-c''1);Unigene0004478(…
GO:0008509	anion transmembrane transporter activity	0.00155385	Unigene0000168(CNGC2);Unigene0000283(ABCG18);Unigene0000445(ABCG11);Unigene0000533(BASS1);Unigene0000659(PPT2);Unigene0000781(ABCG32);Unigene0000849(ABCB4);Unigene0001160(STP14);Unigene0001434(MOT2);Unigene0001435(IREG2);Unigene0001456(TIM8);Unigene0001541(SUC1);Unigene0002307(--);Unigene0002869(CNGC18);Unigene0002879(BASS2);Unigene0003272(SULTR3;4);Unigene0003273(SULTR3;4);Unigene0003574(TIP1-1)…
GO:0015291	secondary active transmembrane transporter activity	0.0016932	Unigene0000233(NPF8.3);Unigene0000533(BASS1);Unigene0000565(YMF16);Unigene0000659(PPT2);Unigene0001137(NPF6.2);Unigene0001138(NPF6.3);Unigene0001139(NPF6.3);Unigene0001160(STP14);Unigene0001445(DTX24);Unigene0001541(SUC1);Unigene0001697(DTX24);Unigene0002307(--);Unigene0002718(DTX25);Unigene0002879(BASS2);Unigene0003120(CAX3);Unigene0003488(STC);Unigene0003845(--);Unigene0005956(At5g42610);Unigen…
GO:0004674	protein serine/threonine kinase activity	0.00174694	Unigene0000074(PTI13);Unigene0000361(LRK10L-1.1);Unigene0000577(At4g39110);Unigene0000585(At1g17230);Unigene0000633(WAK2);Unigene0000635(WAK2);Unigene0000651(ALE2);Unigene0001245(At1g28390);Unigene0002111(ERL1);Unigene0002366(At2g24230);Unigene0003001(At1g64390);Unigene0003473(TMK1);Unigene0003515(At2g41970);Unigene0003918(LECRKS7);Unigene0004789(PHOT1);Unigene0004867(CRCK3);Unigene0005295(ER1);U…
GO:0043565	sequence-specific DNA binding	0.00175322	Unigene0000094(R1B-19);Unigene0000117(WRKY22);Unigene0000661(WRKY71);Unigene0000662(WRKY28);Unigene0000713(REV);Unigene0000962(EIF4A1);Unigene0001005(Solyc04g005320);Unigene0001143(XPB1);Unigene0001234(NAC075);Unigene0001268(WRKY24);Unigene0001581(SHR);Unigene0002106(BZIP34);Unigene0002136(ZAT5);Unigene0002272(INP1);Unigene0002722(MYB62);Unigene0002981(SOG1);Unigene0003940(UBA1C);Unigene0004037(B…
GO:0070205	2-succinyl-6-hydroxy-2,4-cyclohexadiene-1-carboxylate synthase activity	0.00206646	Unigene0000400(PHYLLO);Unigene0001020(--);Unigene0001021(--);Unigene0001362(abhd17c);Unigene0001373(HIPP28);Unigene0002495(DAD2);Unigene0002650(ephA);Unigene0002695(--);Unigene0002698(BDG3);Unigene0004765(--);Unigene0004965(LYPLA1);Unigene0005670(CSE);Unigene0005671(CSE);Unigene0006014(LPA2);Unigene0006781(--);Unigene0007961(--);Unigene0008406(KAI2);Unigene0015256(--);Unigene0016904(WAV2);Unigene…
GO:0022838	substrate-specific channel activity	0.00216498	Unigene0000095(--);Unigene0000168(CNGC2);Unigene0000445(ABCG11);Unigene0000781(ABCG32);Unigene0000849(ABCB4);Unigene0001435(IREG2);Unigene0002869(CNGC18);Unigene0003514(GLR3.4);Unigene0003574(TIP1-1);Unigene0003720(--);Unigene0003821(AKT1);Unigene0005956(At5g42610);Unigene0006411(CLC-B);Unigene0006412(CLC-A);Unigene0006575(ABCG11);Unigene0006919(GLR3.3);Unigene0007153(CNGC20);Unigene0007936(ABCG1…
GO:0001871	pattern binding	0.00216498	Unigene0000361(LRK10L-1.1);Unigene0000633(WAK2);Unigene0000635(WAK2);Unigene0001831(ATL20);Unigene0002197(At4g34480);Unigene0002309(--);Unigene0002386(LRK10L-2.5);Unigene0003853(FKFBP);Unigene0004877(LRK10L-1.3);Unigene0004879(--);Unigene0006866(At1g32860);Unigene0009477(WAKL20);Unigene0009478(WAKL14);Unigene0011207(WAK3);Unigene0011210(WAK2);Unigene0013207(At5g56590);Unigene0013277(At5g58090);Un…
GO:0030247	polysaccharide binding	0.00216498	Unigene0000361(LRK10L-1.1);Unigene0000633(WAK2);Unigene0000635(WAK2);Unigene0001831(ATL20);Unigene0002197(At4g34480);Unigene0002309(--);Unigene0002386(LRK10L-2.5);Unigene0003853(FKFBP);Unigene0004877(LRK10L-1.3);Unigene0004879(--);Unigene0006866(At1g32860);Unigene0009477(WAKL20);Unigene0009478(WAKL14);Unigene0011207(WAK3);Unigene0011210(WAK2);Unigene0013207(At5g56590);Unigene0013277(At5g58090);Un…
GO:0005216	ion channel activity	0.00278971	Unigene0000095(--);Unigene0000168(CNGC2);Unigene0000445(ABCG11);Unigene0000781(ABCG32);Unigene0000849(ABCB4);Unigene0001435(IREG2);Unigene0002869(CNGC18);Unigene0003514(GLR3.4);Unigene0003720(--);Unigene0003821(AKT1);Unigene0005956(At5g42610);Unigene0006411(CLC-B);Unigene0006412(CLC-A);Unigene0006575(ABCG11);Unigene0006919(GLR3.3);Unigene0007153(CNGC20);Unigene0007936(ABCG11);Unigene0008246(ABCG3…
GO:0015926	glucosidase activity	0.00371196	Unigene0002197(At4g34480);Unigene0002859(BACOVA_02659);Unigene0006866(At1g32860);Unigene0013207(At5g56590);Unigene0013277(At5g58090);Unigene0014124(BACOVA_02659);Unigene0016448(INVA);Unigene0021577(--);Unigene0022336(BGLU44);Unigene0023114(At1g11820);Unigene0026653(Gba2);Unigene0029858(GBA2);Unigene0030402(A6);Unigene0031883(BACOVA_02659);Unigene0033944(GATA8);Unigene0034180(BGLU16);Unigene003467…
GO:0016762	xyloglucan:xyloglucosyl transferase activity	0.00490228	Unigene0006066(XTH30);Unigene0007397(XTH15);Unigene0008244(XTH31);Unigene0014038(XTH32);Unigene0016222(XTH30);Unigene0017840(XTH5);Unigene0020737(XTH23);Unigene0023866(XTH28);Unigene0024812(XTH16);Unigene0028050(XTH33);Unigene0031555(XTH8);Unigene0031556(XTH8)
GO:0015238	drug transmembrane transporter activity	0.00562345	Unigene0000283(ABCG18);Unigene0000445(ABCG11);Unigene0000781(ABCG32);Unigene0000849(ABCB4);Unigene0001160(STP14);Unigene0001445(DTX24);Unigene0001697(DTX24);Unigene0002718(DTX25);Unigene0005148(ABCG15);Unigene0006337(DTX24);Unigene0006575(ABCG11);Unigene0007936(ABCG11);Unigene0008246(ABCG36);Unigene0008248(PDR1);Unigene0011854(PLT6);Unigene0014102(OCT7);Unigene0014934(ABCC4);Unigene0016384(DTX27)…
GO:0090484	drug transporter activity	0.00562345	Unigene0000283(ABCG18);Unigene0000445(ABCG11);Unigene0000781(ABCG32);Unigene0000849(ABCB4);Unigene0001160(STP14);Unigene0001445(DTX24);Unigene0001697(DTX24);Unigene0002718(DTX25);Unigene0005148(ABCG15);Unigene0006337(DTX24);Unigene0006575(ABCG11);Unigene0007936(ABCG11);Unigene0008246(ABCG36);Unigene0008248(PDR1);Unigene0011854(PLT6);Unigene0014102(OCT7);Unigene0014934(ABCC4);Unigene0016384(DTX27)…
GO:0022857	transmembrane transporter activity	0.00603214	Unigene0000095(--);Unigene0000168(CNGC2);Unigene0000226(HMA4);Unigene0000233(NPF8.3);Unigene0000283(ABCG18);Unigene0000445(ABCG11);Unigene0000533(BASS1);Unigene0000565(YMF16);Unigene0000659(PPT2);Unigene0000766(ALMT2);Unigene0000781(ABCG32);Unigene0000806(IPT1);Unigene0000849(ABCB4);Unigene0001045(ZIP3);Unigene0001116(NAT2);Unigene0001137(NPF6.2);Unigene0001138(NPF6.3);Unigene0001139(NPF6.3);Unig…
GO:0008422	beta-glucosidase activity	0.00603214	Unigene0002197(At4g34480);Unigene0002859(BACOVA_02659);Unigene0006866(At1g32860);Unigene0013207(At5g56590);Unigene0013277(At5g58090);Unigene0014124(BACOVA_02659);Unigene0021577(--);Unigene0022336(BGLU44);Unigene0023114(At1g11820);Unigene0026653(Gba2);Unigene0029858(GBA2);Unigene0030402(A6);Unigene0031883(BACOVA_02659);Unigene0034180(BGLU16);Unigene0034676(BGLU11);Unigene0034837(At1g64760);Unigene…
GO:0008891	glycolate oxidase activity	0.00603214	Unigene0001080(At1g30700);Unigene0001771(DIM);Unigene0001772(DIM);Unigene0006634(At4g20820);Unigene0008215(At4g20820);Unigene0009677(At4g20820);Unigene0009718(GLO5);Unigene0009880(MEE23);Unigene0011117(CKX3);Unigene0019951(At4g20840);Unigene0023151(CKX7);Unigene0023645(BBE1);Unigene0023801(MEE23);Unigene0029766(At4g20840);Unigene0035012(At5g44440)
GO:0015114	phosphate ion transmembrane transporter activity	0.00603214	Unigene0000168(CNGC2);Unigene0000283(ABCG18);Unigene0000445(ABCG11);Unigene0000659(PPT2);Unigene0000781(ABCG32);Unigene0000849(ABCB4);Unigene0001160(STP14);Unigene0001434(MOT2);Unigene0001435(IREG2);Unigene0001456(TIM8);Unigene0001541(SUC1);Unigene0002869(CNGC18);Unigene0002879(BASS2);Unigene0003574(TIP1-1);Unigene0003716(VHA-c''1);Unigene0004478(RAN1);Unigene0004848(MRS2-I);Unigene0004957(HMA4);…
GO:0016747	transferase activity, transferring acyl groups other than amino-acyl groups	0.00668284	Unigene0000400(PHYLLO);Unigene0000504(--);Unigene0000589(NAA50);Unigene0000644(CER2);Unigene0000716(Os04g0179200);Unigene0000759(RAM2);Unigene0001019(5MAT1);Unigene0001198(KCS4);Unigene0001371(BT3);Unigene0001547(PDAT1);Unigene0002194(PAT22);Unigene0002957(At2g39020);Unigene0003070(CHS);Unigene0003642(HMGS);Unigene0003647(KAS3B);Unigene0003765(TIC32);Unigene0004070(GPAT6);Unigene0004373(CCR1);Uni…
GO:0008374	O-acyltransferase activity	0.00777962	Unigene0000400(PHYLLO);Unigene0000759(RAM2);Unigene0001547(PDAT1);Unigene0004070(GPAT6);Unigene0004765(--);Unigene0005762(CRK26);Unigene0007007(WSD1);Unigene0007008(WSD1);Unigene0008882(PSAT);Unigene0008889(RAM2);Unigene0009442(ASAT1);Unigene0013049(TBL16);Unigene0013657(TBR);Unigene0014501(TBL6);Unigene0015256(--);Unigene0015389(ESK1);Unigene0018646(SAT3);Unigene0020015(SAT1);Unigene0020965(LCAT…
GO:0008028	monocarboxylic acid transmembrane transporter activity	0.00777962	Unigene0000283(ABCG18);Unigene0000445(ABCG11);Unigene0000533(BASS1);Unigene0000659(PPT2);Unigene0000781(ABCG32);Unigene0000849(ABCB4);Unigene0001160(STP14);Unigene0002879(BASS2);Unigene0005148(ABCG15);Unigene0006575(ABCG11);Unigene0007936(ABCG11);Unigene0008246(ABCG36);Unigene0008248(PDR1);Unigene0009423(OCT1);Unigene0011619(PLT5);Unigene0011854(PLT6);Unigene0012167(At1g31830);Unigene0014102(OCT7…
GO:0000155	phosphorelay sensor kinase activity	0.00804275	Unigene0000020(XI-F);Unigene0000499(PHYB);Unigene0001720(--);Unigene0004789(PHOT1);Unigene0005580(PHYA1);Unigene0005582(PHYA1);Unigene0005583(PHYA1);Unigene0005835(PHOT2);Unigene0006679(PHYB);Unigene0020529(PHY1);Unigene0030174(CSK);Unigene0031731(AHK3);Unigene0032510(RABC2A);Unigene0033701(CHLM);Unigene0033963(AHK4);Unigene0033966(AHK4);Unigene0035269(AHK2);Unigene0036096(XI-K)
GO:0016775	phosphotransferase activity, nitrogenous group as acceptor	0.00876423	Unigene0000020(XI-F);Unigene0000499(PHYB);Unigene0001720(--);Unigene0002423(APRR5);Unigene0002424(APRR5);Unigene0004789(PHOT1);Unigene0005580(PHYA1);Unigene0005582(PHYA1);Unigene0005583(PHYA1);Unigene0005835(PHOT2);Unigene0006679(PHYB);Unigene0019567(AHP4);Unigene0020529(PHY1);Unigene0024384(ARR5);Unigene0027487(PPD);Unigene0028032(ARR2);Unigene0028239(AHP1);Unigene0030174(CSK);Unigene0031731(AHK…
GO:0030552	cAMP binding	0.00877639	Unigene0000168(CNGC2);Unigene0002869(CNGC18);Unigene0021467(CNGC4);Unigene0025445(CNGC15C);Unigene0025783(CNGC13);Unigene0033401(CNGC7);Unigene0033411(CNGC2);Unigene0033629(CNGC14)
GO:0030553	cGMP binding	0.00877639	Unigene0000168(CNGC2);Unigene0002869(CNGC18);Unigene0021467(CNGC4);Unigene0025445(CNGC15C);Unigene0025783(CNGC13);Unigene0033401(CNGC7);Unigene0033411(CNGC2);Unigene0033629(CNGC14)
GO:0048037	cofactor binding	0.0109099	Unigene0000288(A1);Unigene0000365(FAR2);Unigene0000366(CHLP);Unigene0000400(PHYLLO);Unigene0000428(NQR);Unigene0000496(FDH1);Unigene0000625(ZDS);Unigene0000716(Os04g0179200);Unigene0000797(CYP82C3);Unigene0001038(CYP82C2);Unigene0001080(At1g30700);Unigene0001118(HCF244);Unigene0001276(UXS5);Unigene0001524(DHAD);Unigene0001771(DIM);Unigene0001772(DIM);Unigene0001904(OsI_16936);Unigene0001987(CSP41…
GO:0046873	metal ion transmembrane transporter activity	0.0113423	Unigene0000168(CNGC2);Unigene0000226(HMA4);Unigene0000283(ABCG18);Unigene0000445(ABCG11);Unigene0000533(BASS1);Unigene0000781(ABCG32);Unigene0000849(ABCB4);Unigene0001045(ZIP3);Unigene0001408(Bp10);Unigene0001409(Bp10);Unigene0001435(IREG2);Unigene0001456(TIM8);Unigene0001571(HMA5);Unigene0002869(CNGC18);Unigene0002879(BASS2);Unigene0003120(CAX3);Unigene0003478(SKU5);Unigene0004478(RAN1);Unigene0…
GO:0004871	signal transducer activity	0.0113423	Unigene0000020(XI-F);Unigene0000074(PTI13);Unigene0000231(R1A-10);Unigene0000499(PHYB);Unigene0000577(At4g39110);Unigene0000651(ALE2);Unigene0001245(At1g28390);Unigene0001720(--);Unigene0002423(APRR5);Unigene0002424(APRR5);Unigene0002940(CDT1A);Unigene0003263(At1g56190);Unigene0003473(TMK1);Unigene0003514(GLR3.4);Unigene0003515(At2g41970);Unigene0004128(APRR1);Unigene0004789(PHOT1);Unigene0005295…
GO:0003973	(S)-2-hydroxy-acid oxidase activity	0.0126798	Unigene0001080(At1g30700);Unigene0001771(DIM);Unigene0001772(DIM);Unigene0006634(At4g20820);Unigene0008215(At4g20820);Unigene0009677(At4g20820);Unigene0009718(GLO5);Unigene0009880(MEE23);Unigene0011117(CKX3);Unigene0019951(At4g20840);Unigene0023151(CKX7);Unigene0023645(BBE1);Unigene0023801(MEE23);Unigene0029766(At4g20840);Unigene0035012(At5g44440)
GO:0004673	protein histidine kinase activity	0.0156684	Unigene0000020(XI-F);Unigene0000499(PHYB);Unigene0001720(--);Unigene0002423(APRR5);Unigene0002424(APRR5);Unigene0004789(PHOT1);Unigene0005580(PHYA1);Unigene0005582(PHYA1);Unigene0005583(PHYA1);Unigene0005835(PHOT2);Unigene0006679(PHYB);Unigene0019567(AHP4);Unigene0020529(PHY1);Unigene0024384(ARR5);Unigene0028032(ARR2);Unigene0028239(AHP1);Unigene0030174(CSK);Unigene0031731(AHK3);Unigene0032510(RA…
GO:0008519	ammonium transmembrane transporter activity	0.0157083	Unigene0000283(ABCG18);Unigene0000445(ABCG11);Unigene0000781(ABCG32);Unigene0000849(ABCB4);Unigene0005148(ABCG15);Unigene0005615(CHER1);Unigene0006575(ABCG11);Unigene0007936(ABCG11);Unigene0008246(ABCG36);Unigene0008248(PDR1);Unigene0009423(OCT1);Unigene0014934(ABCC4);Unigene0017133(AKN);Unigene0019908(AMT1-1);Unigene0019909(AMT1-1);Unigene0022231(ABCG28);Unigene0023607(ABCG39);Unigene0024041(ABC…
GO:0015112	nitrate transmembrane transporter activity	0.0165993	Unigene0000283(ABCG18);Unigene0000445(ABCG11);Unigene0000781(ABCG32);Unigene0000849(ABCB4);Unigene0005148(ABCG15);Unigene0006412(CLC-A);Unigene0006575(ABCG11);Unigene0007936(ABCG11);Unigene0008246(ABCG36);Unigene0008248(PDR1);Unigene0011912(NPF2.13);Unigene0014934(ABCC4);Unigene0022231(ABCG28);Unigene0023607(ABCG39);Unigene0024041(ABCI6);Unigene0024321(NPF7.3);Unigene0025224(ABCC9);Unigene0026121…
GO:0016647	oxidoreductase activity, acting on the CH-NH group of donors, oxygen as acceptor	0.0165993	Unigene0000625(ZDS);Unigene0003503(At2g24580);Unigene0003504(At2g24580);Unigene0007380(At1g12200);Unigene0025671(THI1);Unigene0025672(THI1-2);Unigene0025689(ufaA1);Unigene0026030(CRTL-E-1);Unigene0029400(--);Unigene0029974(PAO1);Unigene0031182(--);Unigene0031387(MO2);Unigene0033049(EMB3004);Unigene0033638(SQE1);Unigene0033639(SQE1);Unigene0034852(SQE1)
GO:0016899	oxidoreductase activity, acting on the CH-OH group of donors, oxygen as acceptor	0.0165993	Unigene0001080(At1g30700);Unigene0001771(DIM);Unigene0001772(DIM);Unigene0006634(At4g20820);Unigene0008215(At4g20820);Unigene0009677(At4g20820);Unigene0009718(GLO5);Unigene0009880(MEE23);Unigene0011117(CKX3);Unigene0019951(At4g20840);Unigene0023151(CKX7);Unigene0023645(BBE1);Unigene0023801(MEE23);Unigene0026767(FAO1);Unigene0029766(At4g20840);Unigene0035012(At5g44440)
GO:0016829	lyase activity	0.0165993	Unigene0000283(ABCG18);Unigene0000365(FAR2);Unigene0000400(PHYLLO);Unigene0000445(ABCG11);Unigene0000458(HEME1);Unigene0000464(SPS2);Unigene0000625(ZDS);Unigene0000700(At3g02650);Unigene0000716(Os04g0179200);Unigene0000781(ABCG32);Unigene0000849(ABCB4);Unigene0001020(--);Unigene0001021(--);Unigene0001258(CBF5);Unigene0001259(CBF5);Unigene0001276(UXS5);Unigene0001362(abhd17c);Unigene0001373(HIPP28…
GO:0015220	choline transmembrane transporter activity	0.0174766	Unigene0000283(ABCG18);Unigene0000445(ABCG11);Unigene0000781(ABCG32);Unigene0000849(ABCB4);Unigene0005148(ABCG15);Unigene0005615(CHER1);Unigene0006575(ABCG11);Unigene0007936(ABCG11);Unigene0008246(ABCG36);Unigene0008248(PDR1);Unigene0014934(ABCC4);Unigene0017133(AKN);Unigene0022231(ABCG28);Unigene0023607(ABCG39);Unigene0024041(ABCI6);Unigene0025224(ABCC9);Unigene0026121(ABCG15);Unigene0026898(ABC…
GO:0045550	geranylgeranyl reductase activity	0.0192388	Unigene0000366(CHLP);Unigene0000625(ZDS);Unigene0003503(At2g24580);Unigene0003504(At2g24580);Unigene0007380(At1g12200);Unigene0007939(PAO2);Unigene0011656(NTR1);Unigene0012170(LPD2);Unigene0022926(CHLP);Unigene0024887(yhiN);Unigene0025671(THI1);Unigene0025672(THI1-2);Unigene0025689(ufaA1);Unigene0026030(CRTL-E-1);Unigene0026767(FAO1);Unigene0026788(YUC3);Unigene0027026(HTH);Unigene0029024(--);Uni…
GO:0016491	oxidoreductase activity	0.0200444	Unigene0000288(A1);Unigene0000323(co-1);Unigene0000337(DVR);Unigene0000347(CYP76B6);Unigene0000365(FAR2);Unigene0000366(CHLP);Unigene0000369(At5g51310);Unigene0000400(PHYLLO);Unigene0000428(NQR);Unigene0000496(FDH1);Unigene0000520(ABC1K7);Unigene0000590(--);Unigene0000625(ZDS);Unigene0000716(Os04g0179200);Unigene0000726(CRD1);Unigene0000759(RAM2);Unigene0000797(CYP82C3);Unigene0000804(PER27);Unig…
GO:0005244	voltage-gated ion channel activity	0.0202604	Unigene0000168(CNGC2);Unigene0002869(CNGC18);Unigene0006411(CLC-B);Unigene0006412(CLC-A);Unigene0017954(SKOR);Unigene0021467(CNGC4);Unigene0025445(CNGC15C);Unigene0026077(WRKY4);Unigene0026850(--);Unigene0027598(CLC-E);Unigene0027646(AKT2);Unigene0029244(TIC100);Unigene0031808(CLC-C);Unigene0033401(CNGC7);Unigene0033411(CNGC2);Unigene0033629(CNGC14);Unigene0033912(TPC1A)
GO:0016413	O-acetyltransferase activity	0.0202604	Unigene0000400(PHYLLO);Unigene0004765(--);Unigene0005762(CRK26);Unigene0013049(TBL16);Unigene0013657(TBR);Unigene0014501(TBL6);Unigene0015256(--);Unigene0015389(ESK1);Unigene0018646(SAT3);Unigene0020015(SAT1);Unigene0025429(--);Unigene0025853(SAT3);Unigene0031321(SAT3);Unigene0031960(TBL35);Unigene0033754(rutD);Unigene0033755(--);Unigene0034091(TBL2)
GO:0022832	voltage-gated channel activity	0.0202604	Unigene0000168(CNGC2);Unigene0002869(CNGC18);Unigene0006411(CLC-B);Unigene0006412(CLC-A);Unigene0017954(SKOR);Unigene0021467(CNGC4);Unigene0025445(CNGC15C);Unigene0026077(WRKY4);Unigene0026850(--);Unigene0027598(CLC-E);Unigene0027646(AKT2);Unigene0029244(TIC100);Unigene0031808(CLC-C);Unigene0033401(CNGC7);Unigene0033411(CNGC2);Unigene0033629(CNGC14);Unigene0033912(TPC1A)
GO:0005057	receptor signaling protein activity	0.022366	Unigene0000020(XI-F);Unigene0000499(PHYB);Unigene0001720(--);Unigene0002423(APRR5);Unigene0002424(APRR5);Unigene0002940(CDT1A);Unigene0003263(At1g56190);Unigene0004128(APRR1);Unigene0004789(PHOT1);Unigene0005580(PHYA1);Unigene0005582(PHYA1);Unigene0005583(PHYA1);Unigene0005835(PHOT2);Unigene0006679(PHYB);Unigene0019567(AHP4);Unigene0019977(--);Unigene0020529(PHY1);Unigene0024384(ARR5);Unigene0025…
GO:0052689	carboxylic ester hydrolase activity	0.0248175	Unigene0000219(PME40);Unigene0000263(AUR3);Unigene0000400(PHYLLO);Unigene0001020(--);Unigene0001021(--);Unigene0001342(PPME1);Unigene0001362(abhd17c);Unigene0002495(DAD2);Unigene0002650(ephA);Unigene0002695(--);Unigene0002698(BDG3);Unigene0003087(PAE9);Unigene0004765(--);Unigene0004965(LYPLA1);Unigene0005485(PECS-1.1);Unigene0005670(CSE);Unigene0005671(CSE);Unigene0006463(CXE12);Unigene0006781(--…
GO:0005516	calmodulin binding	0.0248175	Unigene0000168(CNGC2);Unigene0001371(BT3);Unigene0001771(DIM);Unigene0001772(DIM);Unigene0001973(PICBP);Unigene0002869(CNGC18);Unigene0004273(WRKY11);Unigene0004712(CBP60B);Unigene0005308(CRK5);Unigene0005465(--);Unigene0005474(--);Unigene0008535(GAD);Unigene0009421(CPK20);Unigene0014538(SD22);Unigene0018581(CPK13);Unigene0020835(CRLK1);Unigene0020837(CRLK1);Unigene0021467(CNGC4);Unigene0023653(M…
GO:0033232	D-methionine-transporting ATPase activity	0.0248175	Unigene0000283(ABCG18);Unigene0000445(ABCG11);Unigene0000781(ABCG32);Unigene0000849(ABCB4);Unigene0005148(ABCG15);Unigene0006575(ABCG11);Unigene0007936(ABCG11);Unigene0008246(ABCG36);Unigene0008248(PDR1);Unigene0014934(ABCC4);Unigene0022231(ABCG28);Unigene0023607(ABCG39);Unigene0024041(ABCI6);Unigene0025224(ABCC9);Unigene0026121(ABCG15);Unigene0026898(ABCG28);Unigene0027166(ABCG3);Unigene0027403(…
GO:0042943	D-amino acid transmembrane transporter activity	0.0248175	Unigene0000283(ABCG18);Unigene0000445(ABCG11);Unigene0000781(ABCG32);Unigene0000849(ABCB4);Unigene0005148(ABCG15);Unigene0006575(ABCG11);Unigene0007936(ABCG11);Unigene0008246(ABCG36);Unigene0008248(PDR1);Unigene0014934(ABCC4);Unigene0022231(ABCG28);Unigene0023607(ABCG39);Unigene0024041(ABCI6);Unigene0025224(ABCC9);Unigene0026121(ABCG15);Unigene0026898(ABCG28);Unigene0027166(ABCG3);Unigene0027403(…
GO:0043865	methionine transmembrane transporter activity	0.0248175	Unigene0000283(ABCG18);Unigene0000445(ABCG11);Unigene0000781(ABCG32);Unigene0000849(ABCB4);Unigene0005148(ABCG15);Unigene0006575(ABCG11);Unigene0007936(ABCG11);Unigene0008246(ABCG36);Unigene0008248(PDR1);Unigene0014934(ABCC4);Unigene0022231(ABCG28);Unigene0023607(ABCG39);Unigene0024041(ABCI6);Unigene0025224(ABCC9);Unigene0026121(ABCG15);Unigene0026898(ABCG28);Unigene0027166(ABCG3);Unigene0027403(…
GO:0048474	D-methionine transmembrane transporter activity	0.0248175	Unigene0000283(ABCG18);Unigene0000445(ABCG11);Unigene0000781(ABCG32);Unigene0000849(ABCB4);Unigene0005148(ABCG15);Unigene0006575(ABCG11);Unigene0007936(ABCG11);Unigene0008246(ABCG36);Unigene0008248(PDR1);Unigene0014934(ABCC4);Unigene0022231(ABCG28);Unigene0023607(ABCG39);Unigene0024041(ABCI6);Unigene0025224(ABCC9);Unigene0026121(ABCG15);Unigene0026898(ABCG28);Unigene0027166(ABCG3);Unigene0027403(…
GO:1901243	methionine transmembrane-transporting ATPase activity	0.0248175	Unigene0000283(ABCG18);Unigene0000445(ABCG11);Unigene0000781(ABCG32);Unigene0000849(ABCB4);Unigene0005148(ABCG15);Unigene0006575(ABCG11);Unigene0007936(ABCG11);Unigene0008246(ABCG36);Unigene0008248(PDR1);Unigene0014934(ABCC4);Unigene0022231(ABCG28);Unigene0023607(ABCG39);Unigene0024041(ABCI6);Unigene0025224(ABCC9);Unigene0026121(ABCG15);Unigene0026898(ABCG28);Unigene0027166(ABCG3);Unigene0027403(…
GO:0015098	molybdate ion transmembrane transporter activity	0.0248175	Unigene0000283(ABCG18);Unigene0000445(ABCG11);Unigene0000781(ABCG32);Unigene0000849(ABCB4);Unigene0001434(MOT2);Unigene0005148(ABCG15);Unigene0006391(MOT1);Unigene0006392(MOT1);Unigene0006575(ABCG11);Unigene0007936(ABCG11);Unigene0008246(ABCG36);Unigene0008248(PDR1);Unigene0014934(ABCC4);Unigene0022231(ABCG28);Unigene0023607(ABCG39);Unigene0024041(ABCI6);Unigene0025224(ABCC9);Unigene0026121(ABCG1…
GO:0033612	receptor serine/threonine kinase binding	0.0248175	Unigene0002111(ERL1);Unigene0003077(CRN);Unigene0003464(PUB28);Unigene0005295(ER1);Unigene0014115(BAM1);Unigene0022935(PUB29);Unigene0025784(BAK1);Unigene0026114(CSI1);Unigene0026115(CSI1);Unigene0028276(ER1);Unigene0029919(--)
GO:1901618	organic hydroxy compound transmembrane transporter activity	0.0261756	Unigene0000283(ABCG18);Unigene0000445(ABCG11);Unigene0000533(BASS1);Unigene0000781(ABCG32);Unigene0000849(ABCB4);Unigene0002879(BASS2);Unigene0005148(ABCG15);Unigene0005615(CHER1);Unigene0006575(ABCG11);Unigene0007936(ABCG11);Unigene0008246(ABCG36);Unigene0008248(PDR1);Unigene0008781(At3g47420);Unigene0009423(OCT1);Unigene0014934(ABCC4);Unigene0017133(AKN);Unigene0021761(BASS1);Unigene0022231(ABC…
GO:0004872	receptor activity	0.0276665	Unigene0000020(XI-F);Unigene0000074(PTI13);Unigene0000168(CNGC2);Unigene0000231(R1A-10);Unigene0000499(PHYB);Unigene0000577(At4g39110);Unigene0000651(ALE2);Unigene0001245(At1g28390);Unigene0001720(--);Unigene0003473(TMK1);Unigene0003514(GLR3.4);Unigene0003515(At2g41970);Unigene0004789(PHOT1);Unigene0005295(ER1);Unigene0005580(PHYA1);Unigene0005582(PHYA1);Unigene0005583(PHYA1);Unigene0005835(PHOT2…
GO:0015144	carbohydrate transmembrane transporter activity	0.0276665	Unigene0000283(ABCG18);Unigene0000445(ABCG11);Unigene0000659(PPT2);Unigene0000781(ABCG32);Unigene0000849(ABCB4);Unigene0001160(STP14);Unigene0001541(SUC1);Unigene0003487(MST7);Unigene0003488(STC);Unigene0003523(At4g22990);Unigene0005148(ABCG15);Unigene0006575(ABCG11);Unigene0007936(ABCG11);Unigene0008125(--);Unigene0008246(ABCG36);Unigene0008248(PDR1);Unigene0008411(CAM-1);Unigene0008511(SWEET14)…
GO:1901476	carbohydrate transporter activity	0.0276665	Unigene0000283(ABCG18);Unigene0000445(ABCG11);Unigene0000659(PPT2);Unigene0000781(ABCG32);Unigene0000849(ABCB4);Unigene0001160(STP14);Unigene0001541(SUC1);Unigene0003487(MST7);Unigene0003488(STC);Unigene0003523(At4g22990);Unigene0005148(ABCG15);Unigene0006575(ABCG11);Unigene0007936(ABCG11);Unigene0008125(--);Unigene0008246(ABCG36);Unigene0008248(PDR1);Unigene0008411(CAM-1);Unigene0008511(SWEET14)…
GO:0060089	molecular transducer activity	0.0301187	Unigene0000020(XI-F);Unigene0000074(PTI13);Unigene0000168(CNGC2);Unigene0000231(R1A-10);Unigene0000499(PHYB);Unigene0000577(At4g39110);Unigene0000651(ALE2);Unigene0001245(At1g28390);Unigene0001720(--);Unigene0003473(TMK1);Unigene0003514(GLR3.4);Unigene0003515(At2g41970);Unigene0004789(PHOT1);Unigene0005295(ER1);Unigene0005580(PHYA1);Unigene0005582(PHYA1);Unigene0005583(PHYA1);Unigene0005835(PHOT2…
GO:0051119	sugar transmembrane transporter activity	0.03016	Unigene0000283(ABCG18);Unigene0000445(ABCG11);Unigene0000781(ABCG32);Unigene0000849(ABCB4);Unigene0001160(STP14);Unigene0001541(SUC1);Unigene0003487(MST7);Unigene0003488(STC);Unigene0003523(At4g22990);Unigene0005148(ABCG15);Unigene0006575(ABCG11);Unigene0007936(ABCG11);Unigene0008125(--);Unigene0008246(ABCG36);Unigene0008248(PDR1);Unigene0008511(SWEET14);Unigene0009423(OCT1);Unigene0011272(SWEET1…
GO:0038023	signaling receptor activity	0.0326786	Unigene0000020(XI-F);Unigene0000074(PTI13);Unigene0000231(R1A-10);Unigene0000499(PHYB);Unigene0000577(At4g39110);Unigene0000651(ALE2);Unigene0001245(At1g28390);Unigene0001720(--);Unigene0003473(TMK1);Unigene0003514(GLR3.4);Unigene0003515(At2g41970);Unigene0004789(PHOT1);Unigene0005295(ER1);Unigene0005580(PHYA1);Unigene0005582(PHYA1);Unigene0005583(PHYA1);Unigene0005835(PHOT2);Unigene0006014(LPA2)…
GO:0022843	voltage-gated cation channel activity	0.0338697	Unigene0000168(CNGC2);Unigene0002869(CNGC18);Unigene0017954(SKOR);Unigene0021467(CNGC4);Unigene0025445(CNGC15C);Unigene0026077(WRKY4);Unigene0026850(--);Unigene0027646(AKT2);Unigene0029244(TIC100);Unigene0033401(CNGC7);Unigene0033411(CNGC2);Unigene0033629(CNGC14);Unigene0033912(TPC1A)
GO:0015318	inorganic solute uptake transmembrane transporter activity	0.0343313	Unigene0000168(CNGC2);Unigene0000445(ABCG11);Unigene0000659(PPT2);Unigene0001160(STP14);Unigene0001434(MOT2);Unigene0001435(IREG2);Unigene0001456(TIM8);Unigene0001541(SUC1);Unigene0002869(CNGC18);Unigene0002879(BASS2);Unigene0003574(TIP1-1);Unigene0003716(VHA-c''1);Unigene0004478(RAN1);Unigene0004848(MRS2-I);Unigene0004957(HMA4);Unigene0005956(At5g42610);Unigene0006412(CLC-A);Unigene0006647(COPT5…
GO:0015563	uptake transmembrane transporter activity	0.0343313	Unigene0000168(CNGC2);Unigene0000445(ABCG11);Unigene0000659(PPT2);Unigene0001160(STP14);Unigene0001434(MOT2);Unigene0001435(IREG2);Unigene0001456(TIM8);Unigene0001541(SUC1);Unigene0002869(CNGC18);Unigene0002879(BASS2);Unigene0003574(TIP1-1);Unigene0003716(VHA-c''1);Unigene0004478(RAN1);Unigene0004848(MRS2-I);Unigene0004957(HMA4);Unigene0005956(At5g42610);Unigene0006412(CLC-A);Unigene0006647(COPT5…
GO:0009884	cytokinin receptor activity	0.0362577	Unigene0031731(AHK3);Unigene0033963(AHK4);Unigene0033966(AHK4);Unigene0035269(AHK2)
GO:0097602	cullin family protein binding	0.0365468	Unigene0000901(Os04g0590900);Unigene0001406(WAV3);Unigene0001532(SIS3);Unigene0002072(ATL6);Unigene0002690(ATL46);Unigene0003091(WAVH1);Unigene0004134(ATL60);Unigene0004534(NIP2);Unigene0005072(WAV3);Unigene0006689(SGR9);Unigene0008031(ATL65);Unigene0008553(ORTH2);Unigene0008615(RHA4A);Unigene0009020(ATL60);Unigene0009068(BRH1);Unigene0011636(EDA40);Unigene0012506(NIP1);Unigene0012745(RHG1A);Unig…
GO:0015075	ion transmembrane transporter activity	0.0387766	Unigene0000095(--);Unigene0000168(CNGC2);Unigene0000226(HMA4);Unigene0000233(NPF8.3);Unigene0000283(ABCG18);Unigene0000445(ABCG11);Unigene0000533(BASS1);Unigene0000659(PPT2);Unigene0000781(ABCG32);Unigene0000849(ABCB4);Unigene0001045(ZIP3);Unigene0001137(NPF6.2);Unigene0001138(NPF6.3);Unigene0001139(NPF6.3);Unigene0001160(STP14);Unigene0001408(Bp10);Unigene0001409(Bp10);Unigene0001434(MOT2);Unige…
GO:0004650	polygalacturonase activity	0.0412722	Unigene0000546(G9);Unigene0001586(plaa2);Unigene0003407(At2g43860);Unigene0004381(GSVIVT00026920001);Unigene0005262(PG1);Unigene0015110(At2g43860);Unigene0016622(PGA3);Unigene0021482(At1g48100);Unigene0027719(PGA3);Unigene0027884(--);Unigene0029455(GSVIVT00026920001);Unigene0029456(GSVIVT00026920001);Unigene0030712(At1g80170);Unigene0032395(GSVIVT00026920001);Unigene0034611(ADPG2);Unigene0035257(…
GO:0015145	monosaccharide transmembrane transporter activity	0.0424045	Unigene0000283(ABCG18);Unigene0000445(ABCG11);Unigene0000781(ABCG32);Unigene0000849(ABCB4);Unigene0001160(STP14);Unigene0005148(ABCG15);Unigene0006575(ABCG11);Unigene0007936(ABCG11);Unigene0008246(ABCG36);Unigene0008248(PDR1);Unigene0011642(NPF5.5);Unigene0011854(PLT6);Unigene0014934(ABCC4);Unigene0022231(ABCG28);Unigene0022847(MSSP2);Unigene0023607(ABCG39);Unigene0024041(ABCI6);Unigene0025224(AB…
GO:0047570	3-oxoadipate enol-lactonase activity	0.0424045	Unigene0000400(PHYLLO);Unigene0001020(--);Unigene0001021(--);Unigene0001362(abhd17c);Unigene0002495(DAD2);Unigene0002650(ephA);Unigene0002695(--);Unigene0002698(BDG3);Unigene0004765(--);Unigene0005670(CSE);Unigene0005671(CSE);Unigene0006781(--);Unigene0007961(--);Unigene0008406(KAI2);Unigene0015256(--);Unigene0016904(WAV2);Unigene0017490(--);Unigene0018165(MES3);Unigene0021658(D14L);Unigene002301…
GO:0043167	ion binding	0.0424045	Unigene0000007(--);Unigene0000008(CRK5);Unigene0000015(TUBB1);Unigene0000018(R1A-4);Unigene0000020(XI-F);Unigene0000023(At5g35370);Unigene0000027(ctps);Unigene0000029(At1g56140);Unigene0000030(At1g56140);Unigene0000057(R1A-10);Unigene0000074(PTI13);Unigene0000077(ARAC11);Unigene0000083(RPP13L3);Unigene0000085(R1B-16);Unigene0000094(R1B-19);Unigene0000100(R1B-16);Unigene0000126(IAA7);Unigene000015…
0035153(MO2);Unigene0035162(PUB30);Unigene0035173(PUB35);Unigene0035201(--);Unigene0035264(TMK1);Unigene0035269(AHK2);Unigene0035273(AAE14);Unigene0035285(Os07g0679700);Unigene0035286(PIX7);Unigene0035287(PUB4);Unigene0035304(OLE3);Unigene0035355(FAR1);Unigene0035399(TFB4);Unigene0035401(At1g03050);Unigene0035402(At1g03050);Unigene0035404(--);Unigene0035413(GDH2);Unigene0035454(BBX24);Unigene0035…
GO:0046872	metal ion binding	0.0463368	Unigene0000007(--);Unigene0000126(IAA7);Unigene0000226(HMA4);Unigene0000263(AUR3);Unigene0000347(CYP76B6);Unigene0000369(At5g51310);Unigene0000400(PHYLLO);Unigene0000534(PCMP-H63);Unigene0000562(CML41);Unigene0000633(WAK2);Unigene0000635(WAK2);Unigene0000682(RECQL1);Unigene0000707(PCMP-H24);Unigene0000726(CRD1);Unigene0000759(RAM2);Unigene0000794(CDA1);Unigene0000797(CYP82C3);Unigene0000822(At3g1…
GO:0016746	transferase activity, transferring acyl groups	0.0474049	Unigene0000400(PHYLLO);Unigene0000504(--);Unigene0000589(NAA50);Unigene0000644(CER2);Unigene0000716(Os04g0179200);Unigene0000759(RAM2);Unigene0000790(GGT3);Unigene0001019(5MAT1);Unigene0001198(KCS4);Unigene0001359(APUM7);Unigene0001371(BT3);Unigene0001547(PDAT1);Unigene0002194(PAT22);Unigene0002945(GGT3);Unigene0002957(At2g39020);Unigene0003070(CHS);Unigene0003082(PDC1);Unigene0003642(HMGS);Unige…
GO:0015101	organic cation transmembrane transporter activity	0.0474049	Unigene0000283(ABCG18);Unigene0000445(ABCG11);Unigene0000781(ABCG32);Unigene0000849(ABCB4);Unigene0005148(ABCG15);Unigene0005615(CHER1);Unigene0006575(ABCG11);Unigene0007936(ABCG11);Unigene0008246(ABCG36);Unigene0008248(PDR1);Unigene0009423(OCT1);Unigene0014934(ABCC4);Unigene0022231(ABCG28);Unigene0023607(ABCG39);Unigene0024041(ABCI6);Unigene0024576(PYL2);Unigene0025224(ABCC9);Unigene0025666(At5g…
GO:0015116	sulfate transmembrane transporter activity	0.0474049	Unigene0000283(ABCG18);Unigene0000445(ABCG11);Unigene0000781(ABCG32);Unigene0000849(ABCB4);Unigene0001434(MOT2);Unigene0003272(SULTR3;4);Unigene0003273(SULTR3;4);Unigene0005148(ABCG15);Unigene0006391(MOT1);Unigene0006575(ABCG11);Unigene0007936(ABCG11);Unigene0008246(ABCG36);Unigene0008248(PDR1);Unigene0013709(CDKB2-2);Unigene0014934(ABCC4);Unigene0022231(ABCG28);Unigene0023607(ABCG39);Unigene0024…
GO:0030551	cyclic nucleotide binding	0.0485834	Unigene0000168(CNGC2);Unigene0002869(CNGC18);Unigene0021467(CNGC4);Unigene0025445(CNGC15C);Unigene0025783(CNGC13);Unigene0033401(CNGC7);Unigene0033411(CNGC2);Unigene0033629(CNGC14)
GO:0022836	gated channel activity	0.0501553	Unigene0000168(CNGC2);Unigene0002869(CNGC18);Unigene0003514(GLR3.4);Unigene0006411(CLC-B);Unigene0006412(CLC-A);Unigene0006919(GLR3.3);Unigene0012992(GLR3.2);Unigene0014348(GLR2.8);Unigene0017954(SKOR);Unigene0019862(GLR2.8);Unigene0021467(CNGC4);Unigene0023885(GLR3.5);Unigene0025445(CNGC15C);Unigene0026077(WRKY4);Unigene0026850(--);Unigene0027598(CLC-E);Unigene0027646(AKT2);Unigene0028096(MAF1);…
GO:0043169	cation binding	0.0515155	Unigene0000007(--);Unigene0000126(IAA7);Unigene0000226(HMA4);Unigene0000263(AUR3);Unigene0000347(CYP76B6);Unigene0000369(At5g51310);Unigene0000400(PHYLLO);Unigene0000534(PCMP-H63);Unigene0000562(CML41);Unigene0000633(WAK2);Unigene0000635(WAK2);Unigene0000682(RECQL1);Unigene0000707(PCMP-H24);Unigene0000726(CRD1);Unigene0000759(RAM2);Unigene0000794(CDA1);Unigene0000797(CYP82C3);Unigene0000822(At3g1…
GO:0050662	coenzyme binding	0.0515155	Unigene0000288(A1);Unigene0000365(FAR2);Unigene0000366(CHLP);Unigene0000400(PHYLLO);Unigene0000428(NQR);Unigene0000496(FDH1);Unigene0000625(ZDS);Unigene0000716(Os04g0179200);Unigene0001080(At1g30700);Unigene0001118(HCF244);Unigene0001276(UXS5);Unigene0001771(DIM);Unigene0001772(DIM);Unigene0001904(OsI_16936);Unigene0001987(CSP41A);Unigene0002191(CAD1);Unigene0002261(PHS1);Unigene0002594(P4H10);Un…
GO:0016835	carbon-oxygen lyase activity	0.0541463	Unigene0000365(FAR2);Unigene0000400(PHYLLO);Unigene0000625(ZDS);Unigene0000700(At3g02650);Unigene0000716(Os04g0179200);Unigene0001020(--);Unigene0001021(--);Unigene0001258(CBF5);Unigene0001259(CBF5);Unigene0001276(UXS5);Unigene0001362(abhd17c);Unigene0001373(HIPP28);Unigene0001524(DHAD);Unigene0001904(OsI_16936);Unigene0001987(CSP41A);Unigene0002323(VIT_05s0020g02800);Unigene0002495(DAD2);Unigene…
GO:0030599	pectinesterase activity	0.0562946	Unigene0000219(PME40);Unigene0000263(AUR3);Unigene0001342(PPME1);Unigene0005485(PECS-1.1);Unigene0009264(PME34);Unigene0012248(PMEU1);Unigene0012250(PME2);Unigene0017706(PME28);Unigene0022115(PME24);Unigene0026023(PME58);Unigene0026198(PECS-2.1);Unigene0026722(PME51);Unigene0027237(LECRKS2);Unigene0027850(MPE3);Unigene0028935(PME44);Unigene0031551(PME2.1);Unigene0031943(FAB1B);Unigene0036500(PPME…
GO:0015414	nitrate transmembrane-transporting ATPase activity	0.0562946	Unigene0000283(ABCG18);Unigene0000445(ABCG11);Unigene0000781(ABCG32);Unigene0000849(ABCB4);Unigene0005148(ABCG15);Unigene0006575(ABCG11);Unigene0007936(ABCG11);Unigene0008246(ABCG36);Unigene0008248(PDR1);Unigene0014934(ABCC4);Unigene0022231(ABCG28);Unigene0023607(ABCG39);Unigene0024041(ABCI6);Unigene0025224(ABCC9);Unigene0026121(ABCG15);Unigene0026898(ABCG28);Unigene0027166(ABCG3);Unigene0027403(…
GO:0015417	polyamine-transporting ATPase activity	0.0562946	Unigene0000283(ABCG18);Unigene0000445(ABCG11);Unigene0000781(ABCG32);Unigene0000849(ABCB4);Unigene0005148(ABCG15);Unigene0006575(ABCG11);Unigene0007936(ABCG11);Unigene0008246(ABCG36);Unigene0008248(PDR1);Unigene0014934(ABCC4);Unigene0022231(ABCG28);Unigene0023607(ABCG39);Unigene0024041(ABCI6);Unigene0025224(ABCC9);Unigene0026121(ABCG15);Unigene0026898(ABCG28);Unigene0027166(ABCG3);Unigene0027403(…
GO:0052381	tRNA dimethylallyltransferase activity	0.0562946	Unigene0000569(IPT5);Unigene0000806(IPT1);Unigene0003967(CLPX1);Unigene0008144(IPT1);Unigene0014347(IPT5);Unigene0034511(IPT9)
GO:0015412	molybdate transmembrane-transporting ATPase activity	0.0562946	Unigene0000283(ABCG18);Unigene0000445(ABCG11);Unigene0000781(ABCG32);Unigene0000849(ABCB4);Unigene0005148(ABCG15);Unigene0006575(ABCG11);Unigene0007936(ABCG11);Unigene0008246(ABCG36);Unigene0008248(PDR1);Unigene0014934(ABCC4);Unigene0022231(ABCG28);Unigene0023607(ABCG39);Unigene0024041(ABCI6);Unigene0025224(ABCC9);Unigene0026121(ABCG15);Unigene0026898(ABCG28);Unigene0027166(ABCG3);Unigene0027403(…
GO:0019199	transmembrane receptor protein kinase activity	0.0562946	Unigene0000074(PTI13);Unigene0000577(At4g39110);Unigene0000651(ALE2);Unigene0001245(At1g28390);Unigene0003473(TMK1);Unigene0003515(At2g41970);Unigene0005295(ER1);Unigene0006214(TMK1);Unigene0007013(At1g80640);Unigene0007143(SRF6);Unigene0008775(PBL17);Unigene0011352(ndhM);Unigene0011755(PBL27);Unigene0014350(At1g80870);Unigene0015465(ALE2);Unigene0018631(At4g27290);Unigene0018880(CEPR1);Unigene00…
GO:0004312	fatty acid synthase activity	0.0562946	Unigene0000716(Os04g0179200);Unigene0001198(KCS4);Unigene0003070(CHS);Unigene0003642(HMGS);Unigene0003647(KAS3B);Unigene0003765(TIC32);Unigene0004373(CCR1);Unigene0005128(ECR);Unigene0008384(MT0715);Unigene0009152(KCS11);Unigene0010197(KCR1);Unigene0011506(CHS);Unigene0012190(TIC32B);Unigene0013319(KCS12);Unigene0014012(SDR2b);Unigene0014236(CUT1);Unigene0019568(--);Unigene0019973(DDB_G0272012);U…
GO:0042910	xenobiotic transporter activity	0.0562946	Unigene0001160(STP14);Unigene0001434(MOT2);Unigene0001445(DTX24);Unigene0001697(DTX24);Unigene0002718(DTX25);Unigene0006337(DTX24);Unigene0008781(At3g47420);Unigene0009423(OCT1);Unigene0011619(PLT5);Unigene0011854(PLT6);Unigene0014102(OCT7);Unigene0016384(DTX27);Unigene0017091(STC);Unigene0017883(DTX14);Unigene0020594(At1g75220);Unigene0022071(DTX53);Unigene0022847(MSSP2);Unigene0025224(ABCC9);Un…
GO:0099600	transmembrane receptor activity	0.0562946	Unigene0000074(PTI13);Unigene0000168(CNGC2);Unigene0000231(R1A-10);Unigene0000577(At4g39110);Unigene0000651(ALE2);Unigene0001245(At1g28390);Unigene0003473(TMK1);Unigene0003514(GLR3.4);Unigene0003515(At2g41970);Unigene0005295(ER1);Unigene0006214(TMK1);Unigene0006919(GLR3.3);Unigene0007013(At1g80640);Unigene0007143(SRF6);Unigene0008775(PBL17);Unigene0011352(ndhM);Unigene0011755(PBL27);Unigene001299…
GO:0015415	phosphate ion transmembrane-transporting ATPase activity	0.0562946	Unigene0000283(ABCG18);Unigene0000445(ABCG11);Unigene0000781(ABCG32);Unigene0000849(ABCB4);Unigene0005148(ABCG15);Unigene0006575(ABCG11);Unigene0007936(ABCG11);Unigene0008246(ABCG36);Unigene0008248(PDR1);Unigene0014934(ABCC4);Unigene0019072(At1g32060);Unigene0022231(ABCG28);Unigene0023607(ABCG39);Unigene0024041(ABCI6);Unigene0025224(ABCC9);Unigene0026121(ABCG15);Unigene0026898(ABCG28);Unigene0027…
GO:0015665	alcohol transmembrane transporter activity	0.0562946	Unigene0000283(ABCG18);Unigene0000445(ABCG11);Unigene0000781(ABCG32);Unigene0000849(ABCB4);Unigene0005148(ABCG15);Unigene0005615(CHER1);Unigene0006575(ABCG11);Unigene0007936(ABCG11);Unigene0008246(ABCG36);Unigene0008248(PDR1);Unigene0008781(At3g47420);Unigene0014934(ABCC4);Unigene0017133(AKN);Unigene0022231(ABCG28);Unigene0023607(ABCG39);Unigene0024041(ABCI6);Unigene0025224(ABCC9);Unigene0026121(…
GO:0022891	substrate-specific transmembrane transporter activity	0.0563442	Unigene0000095(--);Unigene0000168(CNGC2);Unigene0000226(HMA4);Unigene0000233(NPF8.3);Unigene0000283(ABCG18);Unigene0000445(ABCG11);Unigene0000533(BASS1);Unigene0000565(YMF16);Unigene0000659(PPT2);Unigene0000781(ABCG32);Unigene0000849(ABCB4);Unigene0001045(ZIP3);Unigene0001116(NAT2);Unigene0001137(NPF6.2);Unigene0001138(NPF6.3);Unigene0001139(NPF6.3);Unigene0001160(STP14);Unigene0001190(--);Unigen…
GO:0016166	phytoene dehydrogenase activity	0.0563442	Unigene0000625(ZDS);Unigene0007380(At1g12200);Unigene0007939(PAO2);Unigene0022926(CHLP);Unigene0025671(THI1);Unigene0025672(THI1-2);Unigene0025689(ufaA1);Unigene0026788(YUC3);Unigene0027879(CRTISO);Unigene0029400(--);Unigene0029974(PAO1);Unigene0030463(PYROXD2);Unigene0031029(YUC4);Unigene0031387(MO2);Unigene0032081(FLCY);Unigene0033638(SQE1);Unigene0033639(SQE1);Unigene0034852(SQE1);Unigene00360…
GO:0046943	carboxylic acid transmembrane transporter activity	0.0563442	Unigene0000283(ABCG18);Unigene0000445(ABCG11);Unigene0000533(BASS1);Unigene0000659(PPT2);Unigene0000781(ABCG32);Unigene0000849(ABCB4);Unigene0001160(STP14);Unigene0002307(--);Unigene0002879(BASS2);Unigene0003967(CLPX1);Unigene0004141(AVT6C);Unigene0005148(ABCG15);Unigene0006575(ABCG11);Unigene0007936(ABCG11);Unigene0008246(ABCG36);Unigene0008248(PDR1);Unigene0008292(At1g31830);Unigene0009423(OCT1…
GO:0015146	pentose transmembrane transporter activity	0.0563442	Unigene0000283(ABCG18);Unigene0000445(ABCG11);Unigene0000781(ABCG32);Unigene0000849(ABCB4);Unigene0005148(ABCG15);Unigene0006575(ABCG11);Unigene0007936(ABCG11);Unigene0008246(ABCG36);Unigene0008248(PDR1);Unigene0014934(ABCC4);Unigene0022231(ABCG28);Unigene0023607(ABCG39);Unigene0024041(ABCI6);Unigene0025224(ABCC9);Unigene0026121(ABCG15);Unigene0026898(ABCG28);Unigene0027166(ABCG3);Unigene0027403(…
GO:0015148	D-xylose transmembrane transporter activity	0.0563442	Unigene0000283(ABCG18);Unigene0000445(ABCG11);Unigene0000781(ABCG32);Unigene0000849(ABCB4);Unigene0005148(ABCG15);Unigene0006575(ABCG11);Unigene0007936(ABCG11);Unigene0008246(ABCG36);Unigene0008248(PDR1);Unigene0014934(ABCC4);Unigene0022231(ABCG28);Unigene0023607(ABCG39);Unigene0024041(ABCI6);Unigene0025224(ABCC9);Unigene0026121(ABCG15);Unigene0026898(ABCG28);Unigene0027166(ABCG3);Unigene0027403(…
GO:0015407	monosaccharide-transporting ATPase activity	0.0563442	Unigene0000283(ABCG18);Unigene0000445(ABCG11);Unigene0000781(ABCG32);Unigene0000849(ABCB4);Unigene0005148(ABCG15);Unigene0006575(ABCG11);Unigene0007936(ABCG11);Unigene0008246(ABCG36);Unigene0008248(PDR1);Unigene0014934(ABCC4);Unigene0022231(ABCG28);Unigene0023607(ABCG39);Unigene0024041(ABCI6);Unigene0025224(ABCC9);Unigene0026121(ABCG15);Unigene0026898(ABCG28);Unigene0027166(ABCG3);Unigene0027403(…
GO:0015608	carbohydrate-importing ATPase activity	0.0563442	Unigene0000283(ABCG18);Unigene0000445(ABCG11);Unigene0000781(ABCG32);Unigene0000849(ABCB4);Unigene0005148(ABCG15);Unigene0006575(ABCG11);Unigene0007936(ABCG11);Unigene0008246(ABCG36);Unigene0008248(PDR1);Unigene0014934(ABCC4);Unigene0022231(ABCG28);Unigene0023607(ABCG39);Unigene0024041(ABCI6);Unigene0025224(ABCC9);Unigene0026121(ABCG15);Unigene0026898(ABCG28);Unigene0027166(ABCG3);Unigene0027403(…
GO:0015614	D-xylose-importing ATPase activity	0.0563442	Unigene0000283(ABCG18);Unigene0000445(ABCG11);Unigene0000781(ABCG32);Unigene0000849(ABCB4);Unigene0005148(ABCG15);Unigene0006575(ABCG11);Unigene0007936(ABCG11);Unigene0008246(ABCG36);Unigene0008248(PDR1);Unigene0014934(ABCC4);Unigene0022231(ABCG28);Unigene0023607(ABCG39);Unigene0024041(ABCI6);Unigene0025224(ABCC9);Unigene0026121(ABCG15);Unigene0026898(ABCG28);Unigene0027166(ABCG3);Unigene0027403(…
GO:0022885	bacteriocin transmembrane transporter activity	0.0563442	Unigene0000283(ABCG18);Unigene0000445(ABCG11);Unigene0000781(ABCG32);Unigene0000849(ABCB4);Unigene0002164(At1g76070);Unigene0005148(ABCG15);Unigene0006575(ABCG11);Unigene0007936(ABCG11);Unigene0008246(ABCG36);Unigene0008248(PDR1);Unigene0014934(ABCC4);Unigene0022231(ABCG28);Unigene0023607(ABCG39);Unigene0024041(ABCI6);Unigene0025224(ABCC9);Unigene0026121(ABCG15);Unigene0026898(ABCG28);Unigene0027…
GO:0033283	organic acid-transporting ATPase activity	0.0563442	Unigene0000283(ABCG18);Unigene0000445(ABCG11);Unigene0000781(ABCG32);Unigene0000849(ABCB4);Unigene0005148(ABCG15);Unigene0006575(ABCG11);Unigene0007936(ABCG11);Unigene0008246(ABCG36);Unigene0008248(PDR1);Unigene0014934(ABCC4);Unigene0022231(ABCG28);Unigene0023607(ABCG39);Unigene0024041(ABCI6);Unigene0025224(ABCC9);Unigene0026121(ABCG15);Unigene0026898(ABCG28);Unigene0027166(ABCG3);Unigene0027403(…
GO:0033284	carboxylic acid-transporting ATPase activity	0.0563442	Unigene0000283(ABCG18);Unigene0000445(ABCG11);Unigene0000781(ABCG32);Unigene0000849(ABCB4);Unigene0005148(ABCG15);Unigene0006575(ABCG11);Unigene0007936(ABCG11);Unigene0008246(ABCG36);Unigene0008248(PDR1);Unigene0014934(ABCC4);Unigene0022231(ABCG28);Unigene0023607(ABCG39);Unigene0024041(ABCI6);Unigene0025224(ABCC9);Unigene0026121(ABCG15);Unigene0026898(ABCG28);Unigene0027166(ABCG3);Unigene0027403(…
GO:0033285	monocarboxylic acid-transporting ATPase activity	0.0563442	Unigene0000283(ABCG18);Unigene0000445(ABCG11);Unigene0000781(ABCG32);Unigene0000849(ABCB4);Unigene0005148(ABCG15);Unigene0006575(ABCG11);Unigene0007936(ABCG11);Unigene0008246(ABCG36);Unigene0008248(PDR1);Unigene0014934(ABCC4);Unigene0022231(ABCG28);Unigene0023607(ABCG39);Unigene0024041(ABCI6);Unigene0025224(ABCC9);Unigene0026121(ABCG15);Unigene0026898(ABCG28);Unigene0027166(ABCG3);Unigene0027403(…
GO:0033286	ectoine-transporting ATPase activity	0.0563442	Unigene0000283(ABCG18);Unigene0000445(ABCG11);Unigene0000781(ABCG32);Unigene0000849(ABCB4);Unigene0005148(ABCG15);Unigene0006575(ABCG11);Unigene0007936(ABCG11);Unigene0008246(ABCG36);Unigene0008248(PDR1);Unigene0014934(ABCC4);Unigene0022231(ABCG28);Unigene0023607(ABCG39);Unigene0024041(ABCI6);Unigene0025224(ABCC9);Unigene0026121(ABCG15);Unigene0026898(ABCG28);Unigene0027166(ABCG3);Unigene0027403(…
GO:0033287	hydroxyectoine transmembrane transporter activity	0.0563442	Unigene0000283(ABCG18);Unigene0000445(ABCG11);Unigene0000781(ABCG32);Unigene0000849(ABCB4);Unigene0005148(ABCG15);Unigene0006575(ABCG11);Unigene0007936(ABCG11);Unigene0008246(ABCG36);Unigene0008248(PDR1);Unigene0014934(ABCC4);Unigene0022231(ABCG28);Unigene0023607(ABCG39);Unigene0024041(ABCI6);Unigene0025224(ABCC9);Unigene0026121(ABCG15);Unigene0026898(ABCG28);Unigene0027166(ABCG3);Unigene0027403(…
GO:0033288	hydroxyectoine-transporting ATPase activity	0.0563442	Unigene0000283(ABCG18);Unigene0000445(ABCG11);Unigene0000781(ABCG32);Unigene0000849(ABCB4);Unigene0005148(ABCG15);Unigene0006575(ABCG11);Unigene0007936(ABCG11);Unigene0008246(ABCG36);Unigene0008248(PDR1);Unigene0014934(ABCC4);Unigene0022231(ABCG28);Unigene0023607(ABCG39);Unigene0024041(ABCI6);Unigene0025224(ABCC9);Unigene0026121(ABCG15);Unigene0026898(ABCG28);Unigene0027166(ABCG3);Unigene0027403(…
GO:0043214	bacteriocin-transporting ATPase activity	0.0563442	Unigene0000283(ABCG18);Unigene0000445(ABCG11);Unigene0000781(ABCG32);Unigene0000849(ABCB4);Unigene0002164(At1g76070);Unigene0005148(ABCG15);Unigene0006575(ABCG11);Unigene0007936(ABCG11);Unigene0008246(ABCG36);Unigene0008248(PDR1);Unigene0014934(ABCC4);Unigene0022231(ABCG28);Unigene0023607(ABCG39);Unigene0024041(ABCI6);Unigene0025224(ABCC9);Unigene0026121(ABCG15);Unigene0026898(ABCG28);Unigene0027…
GO:0051471	ectoine transmembrane transporter activity	0.0563442	Unigene0000283(ABCG18);Unigene0000445(ABCG11);Unigene0000781(ABCG32);Unigene0000849(ABCB4);Unigene0005148(ABCG15);Unigene0006575(ABCG11);Unigene0007936(ABCG11);Unigene0008246(ABCG36);Unigene0008248(PDR1);Unigene0014934(ABCC4);Unigene0022231(ABCG28);Unigene0023607(ABCG39);Unigene0024041(ABCI6);Unigene0025224(ABCC9);Unigene0026121(ABCG15);Unigene0026898(ABCG28);Unigene0027166(ABCG3);Unigene0027403(…
GO:0005342	organic acid transmembrane transporter activity	0.0580909	Unigene0000283(ABCG18);Unigene0000445(ABCG11);Unigene0000533(BASS1);Unigene0000659(PPT2);Unigene0000781(ABCG32);Unigene0000849(ABCB4);Unigene0001160(STP14);Unigene0002307(--);Unigene0002879(BASS2);Unigene0003967(CLPX1);Unigene0004141(AVT6C);Unigene0005148(ABCG15);Unigene0006575(ABCG11);Unigene0007936(ABCG11);Unigene0008246(ABCG36);Unigene0008248(PDR1);Unigene0008292(At1g31830);Unigene0009423(OCT1…
GO:0000156	phosphorelay response regulator activity	0.0586051	Unigene0000499(PHYB);Unigene0002423(APRR5);Unigene0002424(APRR5);Unigene0002940(CDT1A);Unigene0003263(At1g56190);Unigene0004128(APRR1);Unigene0005580(PHYA1);Unigene0005583(PHYA1);Unigene0006679(PHYB);Unigene0019567(AHP4);Unigene0024384(ARR5);Unigene0025827(RR4);Unigene0028032(ARR2);Unigene0028239(AHP1);Unigene0029041(ARR9);Unigene0031731(AHK3);Unigene0032417(ARR17);Unigene0033963(AHK4);Unigene003…
GO:0016709	oxidoreductase activity, acting on paired donors, with incorporation or reduction of molecular oxygen, NAD(P)H as one donor, and incorporation of one atom of oxygen	0.059073	Unigene0000366(CHLP);Unigene0000520(ABC1K7);Unigene0000726(CRD1);Unigene0000797(CYP82C3);Unigene0001038(CYP82C2);Unigene0002108(CYP98A2);Unigene0002828(At4g11690);Unigene0004454(SQE1);Unigene0005561(CIPK6);Unigene0005562(CIPK6);Unigene0007380(At1g12200);Unigene0010192(CYP71A9);Unigene0011453(CYP75B2);Unigene0011656(NTR1);Unigene0013512(At5g49770);Unigene0013981(CIPK32);Unigene0013982(CIPK32);Unig…
GO:0008514	organic anion transmembrane transporter activity	0.0595099	Unigene0000283(ABCG18);Unigene0000445(ABCG11);Unigene0000533(BASS1);Unigene0000659(PPT2);Unigene0000781(ABCG32);Unigene0000849(ABCB4);Unigene0001160(STP14);Unigene0002307(--);Unigene0002879(BASS2);Unigene0003967(CLPX1);Unigene0004141(AVT6C);Unigene0005148(ABCG15);Unigene0006575(ABCG11);Unigene0007936(ABCG11);Unigene0008246(ABCG36);Unigene0008248(PDR1);Unigene0008292(At1g31830);Unigene0008781(At3g…
GO:0004629	phospholipase C activity	0.0631025	Unigene0000856(NPC6);Unigene0014349(PLC4);Unigene0030565(PLC2);Unigene0032525(ATAB2);Unigene0033016(PLC6);Unigene0033017(PLC2);Unigene0033977(NPC2);Unigene0035897(NPC3)
GO:0043424	protein histidine kinase binding	0.0631025	Unigene0005163(NAC048);Unigene0016473(WNK5);Unigene0017460(PNSL5);Unigene0019567(AHP4);Unigene0031731(AHK3);Unigene0033963(AHK4);Unigene0033966(AHK4);Unigene0035269(AHK2)
GO:0015203	polyamine transmembrane transporter activity	0.0636552	Unigene0000283(ABCG18);Unigene0000445(ABCG11);Unigene0000781(ABCG32);Unigene0000849(ABCB4);Unigene0005148(ABCG15);Unigene0006575(ABCG11);Unigene0007936(ABCG11);Unigene0008246(ABCG36);Unigene0008248(PDR1);Unigene0014934(ABCC4);Unigene0022231(ABCG28);Unigene0023607(ABCG39);Unigene0024041(ABCI6);Unigene0025224(ABCC9);Unigene0026121(ABCG15);Unigene0026898(ABCG28);Unigene0027166(ABCG3);Unigene0027403(…
GO:0015087	cobalt ion transmembrane transporter activity	0.063873	Unigene0000283(ABCG18);Unigene0000445(ABCG11);Unigene0000781(ABCG32);Unigene0000849(ABCB4);Unigene0005148(ABCG15);Unigene0006575(ABCG11);Unigene0007936(ABCG11);Unigene0008144(IPT1);Unigene0008246(ABCG36);Unigene0008248(PDR1);Unigene0010297(MRS2-4);Unigene0014934(ABCC4);Unigene0022231(ABCG28);Unigene0023607(ABCG39);Unigene0024041(ABCI6);Unigene0025224(ABCC9);Unigene0026121(ABCG15);Unigene0026898(A…
GO:0004043	L-aminoadipate-semialdehyde dehydrogenase activity	0.065184	Unigene0000288(A1);Unigene0000365(FAR2);Unigene0001276(UXS5);Unigene0001820(ALDH7B4);Unigene0004052(LACS1);Unigene0004248(AAE3);Unigene0006461(FAR2);Unigene0006550(4CLL1);Unigene0015499(CCR1);Unigene0020507(fadD28);Unigene0021227(AAE14);Unigene0022994(4CL1);Unigene0028358(FAR3);Unigene0028506(ACS);Unigene0030571(BAN);Unigene0031300(RHM1);Unigene0032247(4CLL7);Unigene0033221(LACS2);Unigene0033898(…
GO:0005261	cation channel activity	0.065184	Unigene0000168(CNGC2);Unigene0001435(IREG2);Unigene0002869(CNGC18);Unigene0003720(--);Unigene0005956(At5g42610);Unigene0017600(CIPK23);Unigene0017954(SKOR);Unigene0021467(CNGC4);Unigene0025445(CNGC15C);Unigene0026077(WRKY4);Unigene0026850(--);Unigene0027646(AKT2);Unigene0029244(TIC100);Unigene0029644(HIPP39);Unigene0030351(CER1);Unigene0033401(CNGC7);Unigene0033411(CNGC2);Unigene0033629(CNGC14);U…
GO:0004888	transmembrane signaling receptor activity	0.0715132	Unigene0000074(PTI13);Unigene0000231(R1A-10);Unigene0000577(At4g39110);Unigene0000651(ALE2);Unigene0001245(At1g28390);Unigene0003473(TMK1);Unigene0003514(GLR3.4);Unigene0003515(At2g41970);Unigene0005295(ER1);Unigene0006214(TMK1);Unigene0006919(GLR3.3);Unigene0007013(At1g80640);Unigene0007143(SRF6);Unigene0008775(PBL17);Unigene0011352(ndhM);Unigene0011755(PBL27);Unigene0012992(GLR3.2);Unigene00143…
GO:0015221	lipopolysaccharide transmembrane transporter activity	0.0715132	Unigene0000283(ABCG18);Unigene0000445(ABCG11);Unigene0000781(ABCG32);Unigene0000849(ABCB4);Unigene0005148(ABCG15);Unigene0006575(ABCG11);Unigene0007936(ABCG11);Unigene0008246(ABCG36);Unigene0008248(PDR1);Unigene0014934(ABCC4);Unigene0022231(ABCG28);Unigene0023607(ABCG39);Unigene0024041(ABCI6);Unigene0025224(ABCC9);Unigene0026121(ABCG15);Unigene0026898(ABCG28);Unigene0027166(ABCG3);Unigene0027403(…
GO:0015462	protein-transmembrane transporting ATPase activity	0.0715132	Unigene0000283(ABCG18);Unigene0000445(ABCG11);Unigene0000781(ABCG32);Unigene0000849(ABCB4);Unigene0002164(At1g76070);Unigene0005148(ABCG15);Unigene0006575(ABCG11);Unigene0007936(ABCG11);Unigene0008246(ABCG36);Unigene0008248(PDR1);Unigene0014934(ABCC4);Unigene0022231(ABCG28);Unigene0023607(ABCG39);Unigene0024041(ABCI6);Unigene0025224(ABCC9);Unigene0026121(ABCG15);Unigene0026898(ABCG28);Unigene0027…
GO:0043212	carbohydrate-exporting ATPase activity	0.0715132	Unigene0000283(ABCG18);Unigene0000445(ABCG11);Unigene0000781(ABCG32);Unigene0000849(ABCB4);Unigene0005148(ABCG15);Unigene0006575(ABCG11);Unigene0007936(ABCG11);Unigene0008246(ABCG36);Unigene0008248(PDR1);Unigene0014934(ABCC4);Unigene0022231(ABCG28);Unigene0023607(ABCG39);Unigene0024041(ABCI6);Unigene0025224(ABCC9);Unigene0026121(ABCG15);Unigene0026898(ABCG28);Unigene0027166(ABCG3);Unigene0027403(…
GO:0003854	3-beta-hydroxy-delta5-steroid dehydrogenase activity	0.0715132	Unigene0000288(A1);Unigene0000365(FAR2);Unigene0000716(Os04g0179200);Unigene0001118(HCF244);Unigene0001276(UXS5);Unigene0002762(3BETAHSD/D2);Unigene0003639(EGS1);Unigene0004301(--);Unigene0004372(CCR1);Unigene0004373(CCR1);Unigene0004610(AXS2);Unigene0006461(FAR2);Unigene0010604(UGE2);Unigene0011991(CCR1);Unigene0014012(SDR2b);Unigene0014313(GAE6);Unigene0015306(GAE3);Unigene0015499(CCR1);Unigene…
GO:0005249	voltage-gated potassium channel activity	0.0762025	Unigene0000168(CNGC2);Unigene0002869(CNGC18);Unigene0017954(SKOR);Unigene0021467(CNGC4);Unigene0025445(CNGC15C);Unigene0026077(WRKY4);Unigene0026850(--);Unigene0027646(AKT2);Unigene0033401(CNGC7);Unigene0033411(CNGC2);Unigene0033629(CNGC14)
GO:0015276	ligand-gated ion channel activity	0.0762025	Unigene0000168(CNGC2);Unigene0003514(GLR3.4);Unigene0006919(GLR3.3);Unigene0012992(GLR3.2);Unigene0014348(GLR2.8);Unigene0017954(SKOR);Unigene0019862(GLR2.8);Unigene0023885(GLR3.5);Unigene0028096(MAF1);Unigene0029644(HIPP39);Unigene0033411(CNGC2)
GO:0022834	ligand-gated channel activity	0.0762025	Unigene0000168(CNGC2);Unigene0003514(GLR3.4);Unigene0006919(GLR3.3);Unigene0012992(GLR3.2);Unigene0014348(GLR2.8);Unigene0017954(SKOR);Unigene0019862(GLR2.8);Unigene0023885(GLR3.5);Unigene0028096(MAF1);Unigene0029644(HIPP39);Unigene0033411(CNGC2)
GO:0005215	transporter activity	0.0769488	Unigene0000095(--);Unigene0000168(CNGC2);Unigene0000226(HMA4);Unigene0000233(NPF8.3);Unigene0000283(ABCG18);Unigene0000346(NUP98A);Unigene0000445(ABCG11);Unigene0000533(BASS1);Unigene0000565(YMF16);Unigene0000659(PPT2);Unigene0000766(ALMT2);Unigene0000781(ABCG32);Unigene0000806(IPT1);Unigene0000849(ABCB4);Unigene0000944(--);Unigene0001045(ZIP3);Unigene0001116(NAT2);Unigene0001137(NPF6.2);Unigene0…
GO:0046914	transition metal ion binding	0.0769488	Unigene0000007(--);Unigene0000126(IAA7);Unigene0000347(CYP76B6);Unigene0000534(PCMP-H63);Unigene0000707(PCMP-H24);Unigene0000759(RAM2);Unigene0000794(CDA1);Unigene0000797(CYP82C3);Unigene0000865(PCMP-H89);Unigene0000901(Os04g0590900);Unigene0000957(MT1);Unigene0001038(CYP82C2);Unigene0001057(3MMP);Unigene0001134(GRP-2);Unigene0001151(AZF3);Unigene0001216(HIPP09);Unigene0001371(BT3);Unigene0001373…
GO:0090482	vitamin transmembrane transporter activity	0.0794291	Unigene0000283(ABCG18);Unigene0000445(ABCG11);Unigene0000781(ABCG32);Unigene0000849(ABCB4);Unigene0005148(ABCG15);Unigene0006575(ABCG11);Unigene0007936(ABCG11);Unigene0008246(ABCG36);Unigene0008248(PDR1);Unigene0014934(ABCC4);Unigene0022231(ABCG28);Unigene0023607(ABCG39);Unigene0024041(ABCI6);Unigene0025224(ABCC9);Unigene0025666(At5g48970);Unigene0026121(ABCG15);Unigene0026287(At2g32040);Unigene0…
GO:0016229	steroid dehydrogenase activity	0.0794945	Unigene0000288(A1);Unigene0000365(FAR2);Unigene0000716(Os04g0179200);Unigene0001118(HCF244);Unigene0001276(UXS5);Unigene0002762(3BETAHSD/D2);Unigene0003639(EGS1);Unigene0004301(--);Unigene0004372(CCR1);Unigene0004373(CCR1);Unigene0004610(AXS2);Unigene0006461(FAR2);Unigene0010604(UGE2);Unigene0011991(CCR1);Unigene0014012(SDR2b);Unigene0014313(GAE6);Unigene0015306(GAE3);Unigene0015499(CCR1);Unigene…
GO:0008320	protein transmembrane transporter activity	0.0817242	Unigene0000283(ABCG18);Unigene0000445(ABCG11);Unigene0000565(YMF16);Unigene0000781(ABCG32);Unigene0000849(ABCB4);Unigene0001190(--);Unigene0001456(TIM8);Unigene0002164(At1g76070);Unigene0005148(ABCG15);Unigene0005488(SECE1);Unigene0006575(ABCG11);Unigene0007936(ABCG11);Unigene0008246(ABCG36);Unigene0008248(PDR1);Unigene0012771(--);Unigene0014934(ABCC4);Unigene0015668(--);Unigene0017417(TIM21);Uni…
GO:0004970	ionotropic glutamate receptor activity	0.0837324	Unigene0003514(GLR3.4);Unigene0006919(GLR3.3);Unigene0012992(GLR3.2);Unigene0014348(GLR2.8);Unigene0019862(GLR2.8);Unigene0023885(GLR3.5)
GO:0008066	glutamate receptor activity	0.0837324	Unigene0003514(GLR3.4);Unigene0006919(GLR3.3);Unigene0012992(GLR3.2);Unigene0014348(GLR2.8);Unigene0019862(GLR2.8);Unigene0023885(GLR3.5)
GO:0017096	acetylserotonin O-methyltransferase activity	0.0849931	Unigene0012145(COMT2);Unigene0012146(COMT1);Unigene0025373(COMT1);Unigene0025374(COMT1)
GO:0030744	luteolin O-methyltransferase activity	0.0849931	Unigene0012145(COMT2);Unigene0012146(COMT1);Unigene0025373(COMT1);Unigene0025374(COMT1)
GO:0030755	quercetin 3-O-methyltransferase activity	0.0849931	Unigene0012145(COMT2);Unigene0012146(COMT1);Unigene0025373(COMT1);Unigene0025374(COMT1)
GO:0033799	myricetin 3'-O-methyltransferase activity	0.0849931	Unigene0012145(COMT2);Unigene0012146(COMT1);Unigene0025373(COMT1);Unigene0025374(COMT1)
GO:0047763	caffeate O-methyltransferase activity	0.0849931	Unigene0012145(COMT2);Unigene0012146(COMT1);Unigene0025373(COMT1);Unigene0025374(COMT1)
GO:0051183	vitamin transporter activity	0.0849931	Unigene0000283(ABCG18);Unigene0000445(ABCG11);Unigene0000781(ABCG32);Unigene0000849(ABCB4);Unigene0005148(ABCG15);Unigene0006184(APSR1);Unigene0006575(ABCG11);Unigene0007936(ABCG11);Unigene0008246(ABCG36);Unigene0008248(PDR1);Unigene0014934(ABCC4);Unigene0022231(ABCG28);Unigene0023607(ABCG39);Unigene0024041(ABCI6);Unigene0025224(ABCC9);Unigene0025666(At5g48970);Unigene0026121(ABCG15);Unigene00262…
GO:0072509	divalent inorganic cation transmembrane transporter activity	0.0849931	Unigene0000168(CNGC2);Unigene0000226(HMA4);Unigene0000283(ABCG18);Unigene0000445(ABCG11);Unigene0000781(ABCG32);Unigene0000849(ABCB4);Unigene0001435(IREG2);Unigene0001571(HMA5);Unigene0002869(CNGC18);Unigene0003120(CAX3);Unigene0004478(RAN1);Unigene0004848(MRS2-I);Unigene0004957(HMA4);Unigene0005148(ABCG15);Unigene0005956(At5g42610);Unigene0005986(--);Unigene0006575(ABCG11);Unigene0007316(ALA9);U…
GO:0033764	steroid dehydrogenase activity, acting on the CH-OH group of donors, NAD or NADP as acceptor	0.0849931	Unigene0000288(A1);Unigene0000365(FAR2);Unigene0000716(Os04g0179200);Unigene0001118(HCF244);Unigene0001276(UXS5);Unigene0002762(3BETAHSD/D2);Unigene0003639(EGS1);Unigene0004301(--);Unigene0004372(CCR1);Unigene0004373(CCR1);Unigene0004610(AXS2);Unigene0006461(FAR2);Unigene0010604(UGE2);Unigene0011991(CCR1);Unigene0014012(SDR2b);Unigene0014313(GAE6);Unigene0015306(GAE3);Unigene0015499(CCR1);Unigene…
GO:0047746	chlorophyllase activity	0.0849931	Unigene0002650(ephA);Unigene0006463(CXE12);Unigene0006781(--);Unigene0019399(CXE18);Unigene0022126(CLH2);Unigene0028269(CXE17);Unigene0034148(HIDM)
GO:0015419	sulfate transmembrane-transporting ATPase activity	0.0849931	Unigene0000283(ABCG18);Unigene0000445(ABCG11);Unigene0000781(ABCG32);Unigene0000849(ABCB4);Unigene0005148(ABCG15);Unigene0006575(ABCG11);Unigene0007936(ABCG11);Unigene0008246(ABCG36);Unigene0008248(PDR1);Unigene0014934(ABCC4);Unigene0022231(ABCG28);Unigene0023607(ABCG39);Unigene0024041(ABCI6);Unigene0025224(ABCC9);Unigene0026121(ABCG15);Unigene0026898(ABCG28);Unigene0027166(ABCG3);Unigene0027403(…
GO:0042954	lipoprotein transporter activity	0.0849931	Unigene0000283(ABCG18);Unigene0000445(ABCG11);Unigene0000781(ABCG32);Unigene0000849(ABCB4);Unigene0005148(ABCG15);Unigene0006575(ABCG11);Unigene0007936(ABCG11);Unigene0008246(ABCG36);Unigene0008248(PDR1);Unigene0014934(ABCC4);Unigene0022231(ABCG28);Unigene0023607(ABCG39);Unigene0024041(ABCI6);Unigene0025224(ABCC9);Unigene0026121(ABCG15);Unigene0026898(ABCG28);Unigene0027166(ABCG3);Unigene0027403(…
GO:0043211	carbohydrate-transporting ATPase activity	0.0849931	Unigene0000283(ABCG18);Unigene0000445(ABCG11);Unigene0000781(ABCG32);Unigene0000849(ABCB4);Unigene0005148(ABCG15);Unigene0006575(ABCG11);Unigene0007936(ABCG11);Unigene0008246(ABCG36);Unigene0008248(PDR1);Unigene0014934(ABCC4);Unigene0022231(ABCG28);Unigene0023607(ABCG39);Unigene0024041(ABCI6);Unigene0025224(ABCC9);Unigene0026121(ABCG15);Unigene0026898(ABCG28);Unigene0027166(ABCG3);Unigene0027403(…
GO:0015085	calcium ion transmembrane transporter activity	0.0849931	Unigene0000168(CNGC2);Unigene0000226(HMA4);Unigene0001571(HMA5);Unigene0002869(CNGC18);Unigene0003120(CAX3);Unigene0004478(RAN1);Unigene0004957(HMA4);Unigene0005956(At5g42610);Unigene0007316(ALA9);Unigene0011512(LCA1);Unigene0011514(LCA1);Unigene0012869(ACA13);Unigene0014806(ALA8);Unigene0018086(PMA4);Unigene0019113(ALA7);Unigene0023106(ECA4);Unigene0025128(PAA2);Unigene0025445(CNGC15C);Unigene00…
GO:0050218	propionate-CoA ligase activity	0.0849931	Unigene0000616(AAE17);Unigene0004052(LACS1);Unigene0004248(AAE3);Unigene0006550(4CLL1);Unigene0010734(AAE2);Unigene0013983(4CLL9);Unigene0020507(fadD28);Unigene0021227(AAE14);Unigene0022994(4CL1);Unigene0028055(LACS6);Unigene0028506(ACS);Unigene0032247(4CLL7);Unigene0033221(LACS2);Unigene0035273(AAE14)
GO:0003824	catalytic activity	0.0862255	Unigene0000008(CRK5);Unigene0000015(TUBB1);Unigene0000020(XI-F);Unigene0000022(CESA2);Unigene0000023(At5g35370);Unigene0000027(ctps);Unigene0000029(At1g56140);Unigene0000030(At1g56140);Unigene0000074(PTI13);Unigene0000077(ARAC11);Unigene0000083(RPP13L3);Unigene0000091(SCPL19);Unigene0000094(R1B-19);Unigene0000129(CAC3);Unigene0000147(SBT1.5);Unigene0000151(LON1);Unigene0000168(CNGC2);Unigene00002…
nigene0025706(--);Unigene0025709(PERK1);Unigene0025710(PERK4);Unigene0025752(WAXY);Unigene0025784(BAK1);Unigene0025793(DGK5);Unigene0025797(AP180);Unigene0025803(TIFY10B);Unigene0025823(HAG2);Unigene0025833(SHM1);Unigene0025834(SHM1);Unigene0025852(yrpB);Unigene0025853(SAT3);Unigene0025855(GSTL2);Unigene0025856(AMSH3);Unigene0025885(DDB_G0275467);Unigene0025901(At3g61360);Unigene0025939(Znf598);U…
GO:1901682	sulfur compound transmembrane transporter activity	0.0865159	Unigene0000283(ABCG18);Unigene0000445(ABCG11);Unigene0000781(ABCG32);Unigene0000849(ABCB4);Unigene0001434(MOT2);Unigene0003272(SULTR3;4);Unigene0003273(SULTR3;4);Unigene0003967(CLPX1);Unigene0005148(ABCG15);Unigene0006391(MOT1);Unigene0006575(ABCG11);Unigene0007936(ABCG11);Unigene0008246(ABCG36);Unigene0008248(PDR1);Unigene0013709(CDKB2-2);Unigene0014626(UTR4);Unigene0014934(ABCC4);Unigene0015722…
GO:0051184	cofactor transporter activity	0.0895394	Unigene0000283(ABCG18);Unigene0000445(ABCG11);Unigene0000781(ABCG32);Unigene0000849(ABCB4);Unigene0005148(ABCG15);Unigene0006575(ABCG11);Unigene0007936(ABCG11);Unigene0008144(IPT1);Unigene0008246(ABCG36);Unigene0008248(PDR1);Unigene0014934(ABCC4);Unigene0018713(DIT1);Unigene0022231(ABCG28);Unigene0023607(ABCG39);Unigene0024041(ABCI6);Unigene0025224(ABCC9);Unigene0026121(ABCG15);Unigene0026287(At2…
GO:0005375	copper ion transmembrane transporter activity	0.0931256	Unigene0000226(HMA4);Unigene0001408(Bp10);Unigene0001409(Bp10);Unigene0001571(HMA5);Unigene0003478(SKU5);Unigene0004478(RAN1);Unigene0004957(HMA4);Unigene0005846(ITN1);Unigene0006188(LPR1);Unigene0006197(Bp10);Unigene0006647(COPT5.1);Unigene0007316(ALA9);Unigene0010014(SKS1);Unigene0011512(LCA1);Unigene0011696(AAO);Unigene0011976(Bp10);Unigene0012869(ACA13);Unigene0014806(ALA8);Unigene0014912(SKU…
GO:0010011	auxin binding	0.0931256	Unigene0009608(T85);Unigene0018109(T85);Unigene0029088(ERABP1)
GO:0050113	inositol oxygenase activity	0.0931256	Unigene0010598(MIOX2);Unigene0017448(MIOX4);Unigene0032759(MIOX1)
GO:0052873	FMN reductase (NADPH) activity	0.0931256	Unigene0000428(NQR);Unigene0005453(NQR);Unigene0016825(NQR)
GO:0046915	transition metal ion transmembrane transporter activity	0.0935404	Unigene0000226(HMA4);Unigene0000283(ABCG18);Unigene0000445(ABCG11);Unigene0000781(ABCG32);Unigene0000849(ABCB4);Unigene0001408(Bp10);Unigene0001409(Bp10);Unigene0001435(IREG2);Unigene0001571(HMA5);Unigene0003478(SKU5);Unigene0004478(RAN1);Unigene0004957(HMA4);Unigene0005148(ABCG15);Unigene0005846(ITN1);Unigene0005986(--);Unigene0006188(LPR1);Unigene0006197(Bp10);Unigene0006575(ABCG11);Unigene0006…
GO:0090422	thiamine pyrophosphate transporter activity	0.0936042	Unigene0000283(ABCG18);Unigene0000445(ABCG11);Unigene0000781(ABCG32);Unigene0000849(ABCB4);Unigene0005148(ABCG15);Unigene0006575(ABCG11);Unigene0007936(ABCG11);Unigene0008246(ABCG36);Unigene0008248(PDR1);Unigene0014934(ABCC4);Unigene0022231(ABCG28);Unigene0023607(ABCG39);Unigene0024041(ABCI6);Unigene0025224(ABCC9);Unigene0025666(At5g48970);Unigene0026121(ABCG15);Unigene0026898(ABCG28);Unigene0027…
GO:0043216	daunorubicin-transporting ATPase activity	0.0937755	Unigene0000283(ABCG18);Unigene0000445(ABCG11);Unigene0000781(ABCG32);Unigene0000849(ABCB4);Unigene0005148(ABCG15);Unigene0006575(ABCG11);Unigene0007936(ABCG11);Unigene0008246(ABCG36);Unigene0008248(PDR1);Unigene0014934(ABCC4);Unigene0022231(ABCG28);Unigene0023607(ABCG39);Unigene0024041(ABCI6);Unigene0025224(ABCC9);Unigene0026121(ABCG15);Unigene0026898(ABCG28);Unigene0027166(ABCG3);Unigene0027403(…
GO:0005254	chloride channel activity	0.0940022	Unigene0000445(ABCG11);Unigene0000781(ABCG32);Unigene0000849(ABCB4);Unigene0006411(CLC-B);Unigene0006412(CLC-A);Unigene0006575(ABCG11);Unigene0007936(ABCG11);Unigene0008246(ABCG36);Unigene0008248(PDR1);Unigene0014934(ABCC4);Unigene0022231(ABCG28);Unigene0023607(ABCG39);Unigene0024041(ABCI6);Unigene0025224(ABCC9);Unigene0026898(ABCG28);Unigene0027403(ABCC4);Unigene0027429(ABCB19);Unigene0027598(CL…
GO:0015234	thiamine transmembrane transporter activity	0.106177	Unigene0000283(ABCG18);Unigene0000445(ABCG11);Unigene0000781(ABCG32);Unigene0000849(ABCB4);Unigene0005148(ABCG15);Unigene0006575(ABCG11);Unigene0007936(ABCG11);Unigene0008246(ABCG36);Unigene0008248(PDR1);Unigene0014934(ABCC4);Unigene0022231(ABCG28);Unigene0023607(ABCG39);Unigene0024041(ABCI6);Unigene0025224(ABCC9);Unigene0025666(At5g48970);Unigene0026121(ABCG15);Unigene0026898(ABCG28);Unigene0027…
GO:0032778	cobalt-transporting ATPase activity	0.106177	Unigene0000283(ABCG18);Unigene0000445(ABCG11);Unigene0000781(ABCG32);Unigene0000849(ABCB4);Unigene0005148(ABCG15);Unigene0006575(ABCG11);Unigene0007936(ABCG11);Unigene0008144(IPT1);Unigene0008246(ABCG36);Unigene0008248(PDR1);Unigene0014934(ABCC4);Unigene0022231(ABCG28);Unigene0023607(ABCG39);Unigene0024041(ABCI6);Unigene0025224(ABCC9);Unigene0026121(ABCG15);Unigene0026898(ABCG28);Unigene0027166(A…
GO:0015440	peptide-transporting ATPase activity	0.106701	Unigene0000283(ABCG18);Unigene0000445(ABCG11);Unigene0000781(ABCG32);Unigene0000849(ABCB4);Unigene0005148(ABCG15);Unigene0006575(ABCG11);Unigene0007936(ABCG11);Unigene0008246(ABCG36);Unigene0008248(PDR1);Unigene0014934(ABCC4);Unigene0022231(ABCG28);Unigene0023607(ABCG39);Unigene0024041(ABCI6);Unigene0025224(ABCC9);Unigene0026121(ABCG15);Unigene0026898(ABCG28);Unigene0027166(ABCG3);Unigene0027403(…
GO:0015035	protein disulfide oxidoreductase activity	0.10759	Unigene0001633(At5g39865);Unigene0005870(At5g39865);Unigene0007441(TBL5);Unigene0010822(At5g39865);Unigene0010949(GRXC6);Unigene0010991(At3g28850);Unigene0012931(--);Unigene0015747(DHAR2);Unigene0016815(GRXC1);Unigene0018626(CDSP32);Unigene0018909(GRXC13);Unigene0018998(GRXC6);Unigene0019275(At5g39865);Unigene0019279(At3g28850);Unigene0020081(GRXC9);Unigene0022112(At1g07700);Unigene0022260(At5g39…
GO:1901677	phosphate transmembrane transporter activity	0.10759	Unigene0000283(ABCG18);Unigene0000445(ABCG11);Unigene0000659(PPT2);Unigene0000781(ABCG32);Unigene0000849(ABCB4);Unigene0005148(ABCG15);Unigene0006575(ABCG11);Unigene0007936(ABCG11);Unigene0008246(ABCG36);Unigene0008248(PDR1);Unigene0008781(At3g47420);Unigene0014626(UTR4);Unigene0014934(ABCC4);Unigene0018001(PUP3);Unigene0019487(At5g64970);Unigene0021655(At3g43660);Unigene0022231(ABCG28);Unigene00…
GO:1901505	carbohydrate derivative transporter activity	0.109049	Unigene0000283(ABCG18);Unigene0000445(ABCG11);Unigene0000659(PPT2);Unigene0000781(ABCG32);Unigene0000849(ABCB4);Unigene0005148(ABCG15);Unigene0006575(ABCG11);Unigene0007936(ABCG11);Unigene0008246(ABCG36);Unigene0008248(PDR1);Unigene0008781(At3g47420);Unigene0014626(UTR4);Unigene0014934(ABCC4);Unigene0018001(PUP3);Unigene0019487(At5g64970);Unigene0022231(ABCG28);Unigene0023607(ABCG39);Unigene00240…
GO:0005267	potassium channel activity	0.11505	Unigene0000168(CNGC2);Unigene0002869(CNGC18);Unigene0017600(CIPK23);Unigene0017954(SKOR);Unigene0021467(CNGC4);Unigene0025445(CNGC15C);Unigene0026077(WRKY4);Unigene0026850(--);Unigene0027646(AKT2);Unigene0033401(CNGC7);Unigene0033411(CNGC2);Unigene0033629(CNGC14);Unigene0036197(CIPK23)
GO:0005402	cation:sugar symporter activity	0.11505	Unigene0001160(STP14);Unigene0001541(SUC1);Unigene0008125(--);Unigene0011642(NPF5.5);Unigene0011854(PLT6);Unigene0014102(OCT7);Unigene0021633(SUC4);Unigene0022847(MSSP2);Unigene0024541(SUC2);Unigene0026778(PHT4;4);Unigene0029477(At1g75220);Unigene0032691(STP13);Unigene0035849(At5g59250)
GO:0030729	acetoacetate-CoA ligase activity	0.11505	Unigene0000616(AAE17);Unigene0004248(AAE3);Unigene0006550(4CLL1);Unigene0010734(AAE2);Unigene0013983(4CLL9);Unigene0020507(fadD28);Unigene0021227(AAE14);Unigene0022994(4CL1);Unigene0028055(LACS6);Unigene0028506(ACS);Unigene0032247(4CLL7);Unigene0033221(LACS2);Unigene0035273(AAE14)
GO:0015439	heme-transporting ATPase activity	0.11505	Unigene0000283(ABCG18);Unigene0000445(ABCG11);Unigene0000781(ABCG32);Unigene0000849(ABCB4);Unigene0005148(ABCG15);Unigene0006575(ABCG11);Unigene0007936(ABCG11);Unigene0008144(IPT1);Unigene0008246(ABCG36);Unigene0008248(PDR1);Unigene0014934(ABCC4);Unigene0022231(ABCG28);Unigene0023607(ABCG39);Unigene0024041(ABCI6);Unigene0025224(ABCC9);Unigene0026121(ABCG15);Unigene0026898(ABCG28);Unigene0027166(A…
GO:0033224	2-aminoethylphosphonate transmembrane transporter activity	0.11505	Unigene0000283(ABCG18);Unigene0000445(ABCG11);Unigene0000781(ABCG32);Unigene0000849(ABCB4);Unigene0005148(ABCG15);Unigene0006575(ABCG11);Unigene0007936(ABCG11);Unigene0008144(IPT1);Unigene0008246(ABCG36);Unigene0008248(PDR1);Unigene0014934(ABCC4);Unigene0022231(ABCG28);Unigene0023607(ABCG39);Unigene0024041(ABCI6);Unigene0025224(ABCC9);Unigene0026121(ABCG15);Unigene0026898(ABCG28);Unigene0027166(A…
GO:0033225	2-aminoethylphosphonate transporting ATPase activity	0.11505	Unigene0000283(ABCG18);Unigene0000445(ABCG11);Unigene0000781(ABCG32);Unigene0000849(ABCB4);Unigene0005148(ABCG15);Unigene0006575(ABCG11);Unigene0007936(ABCG11);Unigene0008144(IPT1);Unigene0008246(ABCG36);Unigene0008248(PDR1);Unigene0014934(ABCC4);Unigene0022231(ABCG28);Unigene0023607(ABCG39);Unigene0024041(ABCI6);Unigene0025224(ABCC9);Unigene0026121(ABCG15);Unigene0026898(ABCG28);Unigene0027166(A…
GO:0045118	azole transporter activity	0.11505	Unigene0000283(ABCG18);Unigene0000445(ABCG11);Unigene0000781(ABCG32);Unigene0000849(ABCB4);Unigene0005148(ABCG15);Unigene0006575(ABCG11);Unigene0007936(ABCG11);Unigene0008246(ABCG36);Unigene0008248(PDR1);Unigene0014934(ABCC4);Unigene0022231(ABCG28);Unigene0023607(ABCG39);Unigene0024041(ABCI6);Unigene0025224(ABCC9);Unigene0025666(At5g48970);Unigene0026121(ABCG15);Unigene0026898(ABCG28);Unigene0027…
GO:1901474	azole transmembrane transporter activity	0.11505	Unigene0000283(ABCG18);Unigene0000445(ABCG11);Unigene0000781(ABCG32);Unigene0000849(ABCB4);Unigene0005148(ABCG15);Unigene0006575(ABCG11);Unigene0007936(ABCG11);Unigene0008246(ABCG36);Unigene0008248(PDR1);Unigene0014934(ABCC4);Unigene0022231(ABCG28);Unigene0023607(ABCG39);Unigene0024041(ABCI6);Unigene0025224(ABCC9);Unigene0025666(At5g48970);Unigene0026121(ABCG15);Unigene0026898(ABCG28);Unigene0027…
GO:0008767	UDP-galactopyranose mutase activity	0.11505	Unigene0000625(ZDS);Unigene0007380(At1g12200);Unigene0007939(PAO2);Unigene0014414(CCT8);Unigene0026767(FAO1);Unigene0027879(CRTISO);Unigene0029400(--);Unigene0032081(FLCY);Unigene0033638(SQE1);Unigene0033639(SQE1);Unigene0034852(SQE1)
GO:0015619	thiamine pyrophosphate-transporting ATPase activity	0.11505	Unigene0000283(ABCG18);Unigene0000445(ABCG11);Unigene0000781(ABCG32);Unigene0000849(ABCB4);Unigene0005148(ABCG15);Unigene0006575(ABCG11);Unigene0007936(ABCG11);Unigene0008246(ABCG36);Unigene0008248(PDR1);Unigene0014934(ABCC4);Unigene0022231(ABCG28);Unigene0023607(ABCG39);Unigene0024041(ABCI6);Unigene0025224(ABCC9);Unigene0026121(ABCG15);Unigene0026898(ABCG28);Unigene0027166(ABCG3);Unigene0027403(…
GO:0048502	thiamine-transporting ATPase activity	0.11505	Unigene0000283(ABCG18);Unigene0000445(ABCG11);Unigene0000781(ABCG32);Unigene0000849(ABCB4);Unigene0005148(ABCG15);Unigene0006575(ABCG11);Unigene0007936(ABCG11);Unigene0008246(ABCG36);Unigene0008248(PDR1);Unigene0014934(ABCC4);Unigene0022231(ABCG28);Unigene0023607(ABCG39);Unigene0024041(ABCI6);Unigene0025224(ABCC9);Unigene0026121(ABCG15);Unigene0026898(ABCG28);Unigene0027166(ABCG3);Unigene0027403(…
GO:0005253	anion channel activity	0.116325	Unigene0000445(ABCG11);Unigene0000781(ABCG32);Unigene0000849(ABCB4);Unigene0006411(CLC-B);Unigene0006412(CLC-A);Unigene0006575(ABCG11);Unigene0007936(ABCG11);Unigene0008246(ABCG36);Unigene0008248(PDR1);Unigene0014934(ABCC4);Unigene0022231(ABCG28);Unigene0023607(ABCG39);Unigene0024041(ABCI6);Unigene0025224(ABCC9);Unigene0026898(ABCG28);Unigene0027403(ABCC4);Unigene0027429(ABCB19);Unigene0027598(CL…
GO:0015108	chloride transmembrane transporter activity	0.116325	Unigene0000445(ABCG11);Unigene0000781(ABCG32);Unigene0000849(ABCB4);Unigene0006411(CLC-B);Unigene0006412(CLC-A);Unigene0006575(ABCG11);Unigene0007936(ABCG11);Unigene0008246(ABCG36);Unigene0008248(PDR1);Unigene0014934(ABCC4);Unigene0022231(ABCG28);Unigene0023607(ABCG39);Unigene0024041(ABCI6);Unigene0025224(ABCC9);Unigene0026898(ABCG28);Unigene0027403(ABCC4);Unigene0027429(ABCB19);Unigene0027598(CL…
GO:0050660	flavin adenine dinucleotide binding	0.117639	Unigene0000366(CHLP);Unigene0000625(ZDS);Unigene0001080(At1g30700);Unigene0001771(DIM);Unigene0001772(DIM);Unigene0004340(Os11g0104900);Unigene0004454(SQE1);Unigene0005848(HTH);Unigene0006634(At4g20820);Unigene0007380(At1g12200);Unigene0008215(At4g20820);Unigene0009677(At4g20820);Unigene0009809(CRY2);Unigene0009880(MEE23);Unigene0011117(CKX3);Unigene0011656(NTR1);Unigene0012170(LPD2);Unigene00185…
GO:0004421	hydroxymethylglutaryl-CoA synthase activity	0.117639	Unigene0001359(APUM7);Unigene0003070(CHS);Unigene0003642(HMGS);Unigene0003647(KAS3B);Unigene0005416(--);Unigene0011506(CHS);Unigene0026923(RPS5)
GO:0005262	calcium channel activity	0.117639	Unigene0000168(CNGC2);Unigene0002869(CNGC18);Unigene0005956(At5g42610);Unigene0025445(CNGC15C);Unigene0029644(HIPP39);Unigene0033411(CNGC2);Unigene0033912(TPC1A)
GO:0017022	myosin binding	0.117639	Unigene0014532(RABC2A);Unigene0019131(JGB);Unigene0019178(MYOB3);Unigene0022881(MYOB1);Unigene0023258(elmoA);Unigene0032510(RABC2A);Unigene0032677(JGB)
GO:0005230	extracellular ligand-gated ion channel activity	0.117639	Unigene0003514(GLR3.4);Unigene0006919(GLR3.3);Unigene0012992(GLR3.2);Unigene0014348(GLR2.8);Unigene0019862(GLR2.8);Unigene0023885(GLR3.5)
GO:0022884	macromolecule transmembrane transporter activity	0.118516	Unigene0000283(ABCG18);Unigene0000445(ABCG11);Unigene0000565(YMF16);Unigene0000781(ABCG32);Unigene0000849(ABCB4);Unigene0001190(--);Unigene0001456(TIM8);Unigene0002164(At1g76070);Unigene0005148(ABCG15);Unigene0005488(SECE1);Unigene0006575(ABCG11);Unigene0007936(ABCG11);Unigene0008246(ABCG36);Unigene0008248(PDR1);Unigene0008411(CAM-1);Unigene0012771(--);Unigene0014934(ABCC4);Unigene0015668(--);Uni…
GO:0043225	anion transmembrane-transporting ATPase activity	0.126039	Unigene0000283(ABCG18);Unigene0000445(ABCG11);Unigene0000781(ABCG32);Unigene0000849(ABCB4);Unigene0005148(ABCG15);Unigene0006575(ABCG11);Unigene0007936(ABCG11);Unigene0008246(ABCG36);Unigene0008248(PDR1);Unigene0014934(ABCC4);Unigene0016838(LSI2);Unigene0019072(At1g32060);Unigene0022231(ABCG28);Unigene0023607(ABCG39);Unigene0024041(ABCI6);Unigene0024125(TUFA);Unigene0025224(ABCC9);Unigene0026121(…
GO:0004675	transmembrane receptor protein serine/threonine kinase activity	0.13308	Unigene0000074(PTI13);Unigene0000577(At4g39110);Unigene0000651(ALE2);Unigene0001245(At1g28390);Unigene0003473(TMK1);Unigene0003515(At2g41970);Unigene0006214(TMK1);Unigene0007013(At1g80640);Unigene0007143(SRF6);Unigene0008775(PBL17);Unigene0011352(ndhM);Unigene0011755(PBL27);Unigene0014350(At1g80870);Unigene0015465(ALE2);Unigene0018631(At4g27290);Unigene0019886(At4g30520);Unigene0022198(ALE2);Unig…
GO:0016702	oxidoreductase activity, acting on single donors with incorporation of molecular oxygen, incorporation of two atoms of oxygen	0.13308	Unigene0000759(RAM2);Unigene0002302(HPD);Unigene0002594(P4H10);Unigene0002838(LOX1.5);Unigene0004102(HSPRO2);Unigene0007008(WSD1);Unigene0007680(ABP19A);Unigene0010804(--);Unigene0010881(NCED2);Unigene0011018(At1g67280);Unigene0011898(LOX1.5);Unigene0015345(CCD4);Unigene0018002(--);Unigene0024066(NCED1);Unigene0024815(LOX2.1);Unigene0025706(--);Unigene0026001(LOX6);Unigene0027958(LOX5);Unigene002…
GO:0005507	copper ion binding	0.136349	Unigene0001216(HIPP09);Unigene0001373(HIPP28);Unigene0001408(Bp10);Unigene0001409(Bp10);Unigene0001524(DHAD);Unigene0001571(HMA5);Unigene0002337(HIPP09);Unigene0002613(UCC1);Unigene0003478(SKU5);Unigene0004478(RAN1);Unigene0004562(--);Unigene0004957(HMA4);Unigene0005268(HIPP44);Unigene0005725(AG118);Unigene0006188(LPR1);Unigene0006197(Bp10);Unigene0009472(HIPP44);Unigene0010014(SKS1);Unigene00116…
GO:0015416	organic phosphonate transmembrane-transporting ATPase activity	0.140089	Unigene0000283(ABCG18);Unigene0000445(ABCG11);Unigene0000781(ABCG32);Unigene0000849(ABCB4);Unigene0005148(ABCG15);Unigene0006575(ABCG11);Unigene0007936(ABCG11);Unigene0008246(ABCG36);Unigene0008248(PDR1);Unigene0014934(ABCC4);Unigene0022231(ABCG28);Unigene0023607(ABCG39);Unigene0024041(ABCI6);Unigene0024125(TUFA);Unigene0025224(ABCC9);Unigene0026121(ABCG15);Unigene0026898(ABCG28);Unigene0027166(A…
GO:0015604	organic phosphonate transmembrane transporter activity	0.140089	Unigene0000283(ABCG18);Unigene0000445(ABCG11);Unigene0000781(ABCG32);Unigene0000849(ABCB4);Unigene0005148(ABCG15);Unigene0006575(ABCG11);Unigene0007936(ABCG11);Unigene0008246(ABCG36);Unigene0008248(PDR1);Unigene0014934(ABCC4);Unigene0022231(ABCG28);Unigene0023607(ABCG39);Unigene0024041(ABCI6);Unigene0024125(TUFA);Unigene0025224(ABCC9);Unigene0026121(ABCG15);Unigene0026898(ABCG28);Unigene0027166(A…
GO:0016854	racemase and epimerase activity	0.143692	Unigene0000288(A1);Unigene0000365(FAR2);Unigene0000716(Os04g0179200);Unigene0001276(UXS5);Unigene0001904(OsI_16936);Unigene0001987(CSP41A);Unigene0002323(VIT_05s0020g02800);Unigene0002762(3BETAHSD/D2);Unigene0003063(GALM);Unigene0003639(EGS1);Unigene0003761(--);Unigene0004373(CCR1);Unigene0004610(AXS2);Unigene0010604(UGE2);Unigene0011991(CCR1);Unigene0014012(SDR2b);Unigene0014313(GAE6);Unigene001…
GO:0003677	DNA binding	0.149282	Unigene0000094(R1B-19);Unigene0000117(WRKY22);Unigene0000219(PME40);Unigene0000661(WRKY71);Unigene0000662(WRKY28);Unigene0000682(RECQL1);Unigene0000712(ATHB-15);Unigene0000713(REV);Unigene0000726(CRD1);Unigene0000786(At1g07660);Unigene0000915(ERF017);Unigene0000962(EIF4A1);Unigene0000973(CURT1B);Unigene0001005(Solyc04g005320);Unigene0001010(AOP1);Unigene0001017(WOX1);Unigene0001143(XPB1);Unigene0…
GO:0015204	urea transmembrane transporter activity	0.151083	Unigene0000283(ABCG18);Unigene0000445(ABCG11);Unigene0000781(ABCG32);Unigene0000849(ABCB4);Unigene0003574(TIP1-1);Unigene0005148(ABCG15);Unigene0006575(ABCG11);Unigene0007936(ABCG11);Unigene0008246(ABCG36);Unigene0008248(PDR1);Unigene0014934(ABCC4);Unigene0016304(At1g68190);Unigene0022231(ABCG28);Unigene0023607(ABCG39);Unigene0024041(ABCI6);Unigene0025224(ABCC9);Unigene0026121(ABCG15);Unigene0026…
GO:0033221	urea-transporting ATPase activity	0.153785	Unigene0000283(ABCG18);Unigene0000445(ABCG11);Unigene0000781(ABCG32);Unigene0000849(ABCB4);Unigene0005148(ABCG15);Unigene0006575(ABCG11);Unigene0007936(ABCG11);Unigene0008246(ABCG36);Unigene0008248(PDR1);Unigene0014934(ABCC4);Unigene0016304(At1g68190);Unigene0022231(ABCG28);Unigene0023607(ABCG39);Unigene0024041(ABCI6);Unigene0025224(ABCC9);Unigene0026121(ABCG15);Unigene0026898(ABCG28);Unigene0027…
GO:0046527	glucosyltransferase activity	0.157089	Unigene0000022(CESA2);Unigene0001171(CSLD2);Unigene0001172(CSLD3);Unigene0002467(UGT76B1);Unigene0004006(CALS5);Unigene0004161(UGT73D1);Unigene0004162(UGT73C5);Unigene0004246(UBI11);Unigene0004535(SPS1);Unigene0005837(AMY1.1);Unigene0007422(CSLG3);Unigene0007650(SUS1);Unigene0008119(UGT76B1);Unigene0008842(UGT80B1);Unigene0009286(SPS2);Unigene0010472(UGT88B1);Unigene0011697(TPS1);Unigene0011698(T…
GO:0004315	3-oxoacyl-[acyl-carrier-protein] synthase activity	0.157089	Unigene0001198(KCS4);Unigene0003070(CHS);Unigene0003642(HMGS);Unigene0003647(KAS3B);Unigene0009152(KCS11);Unigene0011506(CHS);Unigene0013319(KCS12);Unigene0014236(CUT1);Unigene0020836(KCS20);Unigene0020839(KCS1);Unigene0026760(KAS);Unigene0036489(CKS1)
GO:0022839	ion gated channel activity	0.157089	Unigene0000168(CNGC2);Unigene0002869(CNGC18);Unigene0006412(CLC-A);Unigene0017954(SKOR);Unigene0021467(CNGC4);Unigene0025445(CNGC15C);Unigene0027646(AKT2);Unigene0031808(CLC-C);Unigene0033401(CNGC7);Unigene0033411(CNGC2);Unigene0033629(CNGC14);Unigene0033912(TPC1A)
GO:0015413	nickel-transporting ATPase activity	0.157089	Unigene0000283(ABCG18);Unigene0000445(ABCG11);Unigene0000781(ABCG32);Unigene0000849(ABCB4);Unigene0005148(ABCG15);Unigene0006575(ABCG11);Unigene0007936(ABCG11);Unigene0008246(ABCG36);Unigene0008248(PDR1);Unigene0014934(ABCC4);Unigene0022231(ABCG28);Unigene0023607(ABCG39);Unigene0024041(ABCI6);Unigene0025224(ABCC9);Unigene0026121(ABCG15);Unigene0026898(ABCG28);Unigene0027166(ABCG3);Unigene0027403(…
GO:0015424	amino acid-transporting ATPase activity	0.157089	Unigene0000283(ABCG18);Unigene0000445(ABCG11);Unigene0000781(ABCG32);Unigene0000849(ABCB4);Unigene0003967(CLPX1);Unigene0005148(ABCG15);Unigene0006575(ABCG11);Unigene0007936(ABCG11);Unigene0008246(ABCG36);Unigene0008248(PDR1);Unigene0014934(ABCC4);Unigene0015722(SMC4);Unigene0017133(AKN);Unigene0022231(ABCG28);Unigene0023607(ABCG39);Unigene0024041(ABCI6);Unigene0025224(ABCC9);Unigene0026121(ABCG1…
GO:0033229	cysteine transmembrane transporter activity	0.157089	Unigene0000283(ABCG18);Unigene0000445(ABCG11);Unigene0000781(ABCG32);Unigene0000849(ABCB4);Unigene0003967(CLPX1);Unigene0005148(ABCG15);Unigene0006575(ABCG11);Unigene0007936(ABCG11);Unigene0008246(ABCG36);Unigene0008248(PDR1);Unigene0014934(ABCC4);Unigene0015722(SMC4);Unigene0017133(AKN);Unigene0022231(ABCG28);Unigene0023607(ABCG39);Unigene0024041(ABCI6);Unigene0025224(ABCC9);Unigene0026121(ABCG1…
GO:0033230	cysteine-transporting ATPase activity	0.157089	Unigene0000283(ABCG18);Unigene0000445(ABCG11);Unigene0000781(ABCG32);Unigene0000849(ABCB4);Unigene0003967(CLPX1);Unigene0005148(ABCG15);Unigene0006575(ABCG11);Unigene0007936(ABCG11);Unigene0008246(ABCG36);Unigene0008248(PDR1);Unigene0014934(ABCC4);Unigene0015722(SMC4);Unigene0017133(AKN);Unigene0022231(ABCG28);Unigene0023607(ABCG39);Unigene0024041(ABCI6);Unigene0025224(ABCC9);Unigene0026121(ABCG1…
GO:0042879	aldonate transmembrane transporter activity	0.157089	Unigene0000659(PPT2);Unigene0031180(TPT);Unigene0034827(PLGG1);Unigene0035280(TPT)
GO:0004647	phosphoserine phosphatase activity	0.166846	Unigene0000226(HMA4);Unigene0001534(NT5C3B);Unigene0001571(HMA5);Unigene0004478(RAN1);Unigene0004957(HMA4);Unigene0007316(ALA9);Unigene0011512(LCA1);Unigene0012869(ACA13);Unigene0014321(GPP2);Unigene0014806(ALA8);Unigene0018086(PMA4);Unigene0025128(PAA2);Unigene0027281(HMA4);Unigene0028066(ACA8);Unigene0034344(PSP);Unigene0034613(ALA4);Unigene0035906(PMA3);Unigene0036196(At1g17710)
GO:0005260	channel-conductance-controlling ATPase activity	0.168471	Unigene0000445(ABCG11);Unigene0000781(ABCG32);Unigene0000849(ABCB4);Unigene0006575(ABCG11);Unigene0007936(ABCG11);Unigene0008246(ABCG36);Unigene0008248(PDR1);Unigene0014934(ABCC4);Unigene0022231(ABCG28);Unigene0023607(ABCG39);Unigene0024041(ABCI6);Unigene0025224(ABCC9);Unigene0026898(ABCG28);Unigene0027403(ABCC4);Unigene0027429(ABCB19);Unigene0028411(CER3);Unigene0028633(ABCG14);Unigene0029113(AB…
GO:0008460	dTDP-glucose 4,6-dehydratase activity	0.170428	Unigene0000365(FAR2);Unigene0000716(Os04g0179200);Unigene0001276(UXS5);Unigene0001987(CSP41A);Unigene0002762(3BETAHSD/D2);Unigene0003639(EGS1);Unigene0004373(CCR1);Unigene0004610(AXS2);Unigene0006461(FAR2);Unigene0010604(UGE2);Unigene0011991(CCR1);Unigene0014313(GAE6);Unigene0015306(GAE3);Unigene0015499(CCR1);Unigene0016008(GAE4);Unigene0025094(GAE1);Unigene0025127(UGE2);Unigene0028358(FAR3);Unig…
GO:0015605	organophosphate ester transmembrane transporter activity	0.170428	Unigene0000283(ABCG18);Unigene0000445(ABCG11);Unigene0000659(PPT2);Unigene0000781(ABCG32);Unigene0000849(ABCB4);Unigene0005148(ABCG15);Unigene0006575(ABCG11);Unigene0007936(ABCG11);Unigene0008246(ABCG36);Unigene0008248(PDR1);Unigene0008781(At3g47420);Unigene0014626(UTR4);Unigene0014934(ABCC4);Unigene0018001(PUP3);Unigene0019487(At5g64970);Unigene0022231(ABCG28);Unigene0023607(ABCG39);Unigene00240…
GO:0000099	sulfur amino acid transmembrane transporter activity	0.172593	Unigene0000283(ABCG18);Unigene0000445(ABCG11);Unigene0000781(ABCG32);Unigene0000849(ABCB4);Unigene0003967(CLPX1);Unigene0005148(ABCG15);Unigene0006575(ABCG11);Unigene0007936(ABCG11);Unigene0008246(ABCG36);Unigene0008248(PDR1);Unigene0014934(ABCC4);Unigene0015722(SMC4);Unigene0017133(AKN);Unigene0022231(ABCG28);Unigene0023607(ABCG39);Unigene0024041(ABCI6);Unigene0025224(ABCC9);Unigene0026121(ABCG1…
GO:0003987	acetate-CoA ligase activity	0.172947	Unigene0000616(AAE17);Unigene0004052(LACS1);Unigene0004248(AAE3);Unigene0006550(4CLL1);Unigene0010734(AAE2);Unigene0013983(4CLL9);Unigene0020507(fadD28);Unigene0021227(AAE14);Unigene0022994(4CL1);Unigene0028055(LACS6);Unigene0028506(ACS);Unigene0032247(4CLL7);Unigene0033221(LACS2);Unigene0035273(AAE14)
GO:0008668	(2,3-dihydroxybenzoyl)adenylate synthase activity	0.172947	Unigene0000616(AAE17);Unigene0004052(LACS1);Unigene0004248(AAE3);Unigene0006550(4CLL1);Unigene0010734(AAE2);Unigene0013983(4CLL9);Unigene0020507(fadD28);Unigene0021227(AAE14);Unigene0022994(4CL1);Unigene0028055(LACS6);Unigene0028506(ACS);Unigene0032247(4CLL7);Unigene0033221(LACS2);Unigene0035273(AAE14)
GO:0008756	o-succinylbenzoate-CoA ligase activity	0.172947	Unigene0000616(AAE17);Unigene0004052(LACS1);Unigene0004248(AAE3);Unigene0006550(4CLL1);Unigene0010734(AAE2);Unigene0013983(4CLL9);Unigene0020507(fadD28);Unigene0021227(AAE14);Unigene0022994(4CL1);Unigene0028055(LACS6);Unigene0028506(ACS);Unigene0032247(4CLL7);Unigene0033221(LACS2);Unigene0035273(AAE14)
GO:0008792	arginine decarboxylase activity	0.172947	Unigene0003793(ADC1);Unigene0007971(LYSA1);Unigene0019208(ADC1);Unigene0025112(speA);Unigene0028474(ADC1);Unigene0035512(ADC)
GO:0030151	molybdenum ion binding	0.173257	Unigene0005036(SOX);Unigene0005730(NIA);Unigene0028520(At2g14510);Unigene0030942(CNX1);Unigene0034308(MTARC1)
GO:0015450	P-P-bond-hydrolysis-driven protein transmembrane transporter activity	0.173257	Unigene0000283(ABCG18);Unigene0000445(ABCG11);Unigene0000565(YMF16);Unigene0000781(ABCG32);Unigene0000849(ABCB4);Unigene0001190(--);Unigene0001456(TIM8);Unigene0002164(At1g76070);Unigene0005148(ABCG15);Unigene0005488(SECE1);Unigene0006575(ABCG11);Unigene0007936(ABCG11);Unigene0008246(ABCG36);Unigene0008248(PDR1);Unigene0012771(--);Unigene0014934(ABCC4);Unigene0015668(--);Unigene0017417(TIM21);Uni…
GO:0016703	oxidoreductase activity, acting on single donors with incorporation of molecular oxygen, incorporation of one atom of oxygen (internal monooxygenases or internal mixed function oxidases)	0.176468	Unigene0005978(GLO1);Unigene0005979(GLO2);Unigene0005980(GLO1);Unigene0006489(At5g41840);Unigene0009718(GLO5);Unigene0020326(HISN4);Unigene0025852(yrpB);Unigene0026665(TIC55);Unigene0031734(PAO)
GO:0042973	glucan endo-1,3-beta-D-glucosidase activity	0.176468	Unigene0002197(At4g34480);Unigene0006866(At1g32860);Unigene0013207(At5g56590);Unigene0013277(At5g58090);Unigene0021577(--);Unigene0023114(At1g11820);Unigene0030402(A6);Unigene0034837(At1g64760);Unigene0036523(At4g31140)
GO:0033220	amide-transporting ATPase activity	0.179937	Unigene0000283(ABCG18);Unigene0000445(ABCG11);Unigene0000781(ABCG32);Unigene0000849(ABCB4);Unigene0005148(ABCG15);Unigene0006575(ABCG11);Unigene0007936(ABCG11);Unigene0008246(ABCG36);Unigene0008248(PDR1);Unigene0014934(ABCC4);Unigene0016304(At1g68190);Unigene0022231(ABCG28);Unigene0023607(ABCG39);Unigene0024041(ABCI6);Unigene0025224(ABCC9);Unigene0026121(ABCG15);Unigene0026898(ABCG28);Unigene0027…
GO:0008324	cation transmembrane transporter activity	0.183001	Unigene0000168(CNGC2);Unigene0000226(HMA4);Unigene0000233(NPF8.3);Unigene0000283(ABCG18);Unigene0000445(ABCG11);Unigene0000533(BASS1);Unigene0000781(ABCG32);Unigene0000849(ABCB4);Unigene0001045(ZIP3);Unigene0001137(NPF6.2);Unigene0001138(NPF6.3);Unigene0001139(NPF6.3);Unigene0001160(STP14);Unigene0001408(Bp10);Unigene0001409(Bp10);Unigene0001435(IREG2);Unigene0001456(TIM8);Unigene0001541(SUC1);Un…
GO:0015099	nickel cation transmembrane transporter activity	0.187574	Unigene0000283(ABCG18);Unigene0000445(ABCG11);Unigene0000781(ABCG32);Unigene0000849(ABCB4);Unigene0005148(ABCG15);Unigene0006575(ABCG11);Unigene0007936(ABCG11);Unigene0008246(ABCG36);Unigene0008248(PDR1);Unigene0014934(ABCC4);Unigene0022231(ABCG28);Unigene0023607(ABCG39);Unigene0024041(ABCI6);Unigene0025224(ABCC9);Unigene0026121(ABCG15);Unigene0026898(ABCG28);Unigene0027166(ABCG3);Unigene0027403(…
GO:0022892	substrate-specific transporter activity	0.196988	Unigene0000095(--);Unigene0000168(CNGC2);Unigene0000226(HMA4);Unigene0000233(NPF8.3);Unigene0000283(ABCG18);Unigene0000445(ABCG11);Unigene0000533(BASS1);Unigene0000565(YMF16);Unigene0000659(PPT2);Unigene0000781(ABCG32);Unigene0000849(ABCB4);Unigene0001045(ZIP3);Unigene0001116(NAT2);Unigene0001137(NPF6.2);Unigene0001138(NPF6.3);Unigene0001139(NPF6.3);Unigene0001160(STP14);Unigene0001190(--);Unigen…
GO:0004729	oxygen-dependent protoporphyrinogen oxidase activity	0.196988	Unigene0000625(ZDS);Unigene0007380(At1g12200);Unigene0007939(PAO2);Unigene0025671(THI1);Unigene0025672(THI1-2);Unigene0025689(ufaA1);Unigene0027879(CRTISO);Unigene0029400(--);Unigene0029974(PAO1);Unigene0031387(MO2);Unigene0032081(FLCY);Unigene0034852(SQE1);Unigene0036067(YUC3)
GO:0070818	protoporphyrinogen oxidase activity	0.196988	Unigene0000625(ZDS);Unigene0007380(At1g12200);Unigene0007939(PAO2);Unigene0025671(THI1);Unigene0025672(THI1-2);Unigene0025689(ufaA1);Unigene0027879(CRTISO);Unigene0029400(--);Unigene0029974(PAO1);Unigene0031387(MO2);Unigene0032081(FLCY);Unigene0034852(SQE1);Unigene0036067(YUC3)
GO:0015562	efflux transmembrane transporter activity	0.197497	Unigene0003594(MTP9);Unigene0014102(OCT7);Unigene0021376(PIN8);Unigene0022847(MSSP2);Unigene0024083(PIN1A);Unigene0027429(ABCB19);Unigene0029519(MFSD14B);Unigene0032198(MTP4);Unigene0032561(NRT2.5);Unigene0034099(MTP10)
GO:0015173	aromatic amino acid transmembrane transporter activity	0.197497	Unigene0004141(AVT6C);Unigene0016593(LHT1);Unigene0024563(LHT1);Unigene0026306(AVT6C);Unigene0028979(AAP7);Unigene0029831(AAP7);Unigene0032714(At1g25530);Unigene0036168(--)
GO:0005275	amine transmembrane transporter activity	0.200623	Unigene0000283(ABCG18);Unigene0000445(ABCG11);Unigene0000781(ABCG32);Unigene0000849(ABCB4);Unigene0003967(CLPX1);Unigene0005148(ABCG15);Unigene0006575(ABCG11);Unigene0007936(ABCG11);Unigene0008246(ABCG36);Unigene0008248(PDR1);Unigene0008292(At1g31830);Unigene0010708(At3g13620);Unigene0012167(At1g31830);Unigene0014934(ABCC4);Unigene0015722(SMC4);Unigene0016593(LHT1);Unigene0017133(AKN);Unigene0018…
GO:0015232	heme transporter activity	0.20121	Unigene0000283(ABCG18);Unigene0000445(ABCG11);Unigene0000781(ABCG32);Unigene0000849(ABCB4);Unigene0005148(ABCG15);Unigene0006575(ABCG11);Unigene0007936(ABCG11);Unigene0008144(IPT1);Unigene0008246(ABCG36);Unigene0008248(PDR1);Unigene0014934(ABCC4);Unigene0022231(ABCG28);Unigene0023607(ABCG39);Unigene0024041(ABCI6);Unigene0025224(ABCC9);Unigene0026121(ABCG15);Unigene0026898(ABCG28);Unigene0027166(A…
GO:0047473	D-alanine-poly(phosphoribitol) ligase activity	0.202406	Unigene0000616(AAE17);Unigene0004052(LACS1);Unigene0004248(AAE3);Unigene0006550(4CLL1);Unigene0010734(AAE2);Unigene0013983(4CLL9);Unigene0020507(fadD28);Unigene0021227(AAE14);Unigene0022994(4CL1);Unigene0028055(LACS6);Unigene0028506(ACS);Unigene0032247(4CLL7);Unigene0033221(LACS2);Unigene0035273(AAE14)
GO:0016857	racemase and epimerase activity, acting on carbohydrates and derivatives	0.206245	Unigene0000288(A1);Unigene0000365(FAR2);Unigene0000716(Os04g0179200);Unigene0001276(UXS5);Unigene0001987(CSP41A);Unigene0002762(3BETAHSD/D2);Unigene0003063(GALM);Unigene0003639(EGS1);Unigene0003761(--);Unigene0004373(CCR1);Unigene0004610(AXS2);Unigene0010604(UGE2);Unigene0011991(CCR1);Unigene0014012(SDR2b);Unigene0014313(GAE6);Unigene0015306(GAE3);Unigene0015499(CCR1);Unigene0015656(HISN3);Unigen…
GO:0008375	acetylglucosaminyltransferase activity	0.207868	Unigene0000022(CESA2);Unigene0001171(CSLD2);Unigene0001172(CSLD3);Unigene0001551(CSLC5);Unigene0002696(CSLA2);Unigene0010472(UGT88B1);Unigene0010474(RhGT1);Unigene0011982(CSLA9);Unigene0015381(UGT86A1);Unigene0024416(CSLA2);Unigene0024417(CSLA2);Unigene0024418(CSLA2);Unigene0024581(CESA2);Unigene0025048(GLCAT14A);Unigene0025120(--);Unigene0025121(--);Unigene0028572(CSLC12);Unigene0030594(CESA2);U…
GO:0035251	UDP-glucosyltransferase activity	0.208475	Unigene0000022(CESA2);Unigene0001171(CSLD2);Unigene0001172(CSLD3);Unigene0002467(UGT76B1);Unigene0004006(CALS5);Unigene0004161(UGT73D1);Unigene0004162(UGT73C5);Unigene0004246(UBI11);Unigene0004535(SPS1);Unigene0007422(CSLG3);Unigene0007650(SUS1);Unigene0008119(UGT76B1);Unigene0008842(UGT80B1);Unigene0009286(SPS2);Unigene0010472(UGT88B1);Unigene0011697(TPS1);Unigene0011698(TPS1);Unigene0012589(GUX…
GO:0015171	amino acid transmembrane transporter activity	0.209432	Unigene0000283(ABCG18);Unigene0000445(ABCG11);Unigene0000781(ABCG32);Unigene0000849(ABCB4);Unigene0002307(--);Unigene0003967(CLPX1);Unigene0004141(AVT6C);Unigene0005148(ABCG15);Unigene0006575(ABCG11);Unigene0007936(ABCG11);Unigene0008246(ABCG36);Unigene0008248(PDR1);Unigene0008292(At1g31830);Unigene0010708(At3g13620);Unigene0012167(At1g31830);Unigene0014934(ABCC4);Unigene0015722(SMC4);Unigene0016…
GO:0005351	sugar:proton symporter activity	0.210505	Unigene0001160(STP14);Unigene0001541(SUC1);Unigene0011642(NPF5.5);Unigene0011854(PLT6);Unigene0014102(OCT7);Unigene0022847(MSSP2);Unigene0024541(SUC2);Unigene0026778(PHT4;4);Unigene0029477(At1g75220);Unigene0032691(STP13);Unigene0035849(At5g59250)
GO:0018659	4-hydroxybenzoate 3-monooxygenase activity	0.21643	Unigene0000366(CHLP);Unigene0022926(CHLP);Unigene0026788(YUC3);Unigene0031387(MO2);Unigene0033638(SQE1);Unigene0033639(SQE1);Unigene0036067(YUC3)
GO:0005217	intracellular ligand-gated ion channel activity	0.21643	Unigene0000168(CNGC2);Unigene0029644(HIPP39);Unigene0033411(CNGC2)
GO:0008752	FMN reductase activity	0.21643	Unigene0000428(NQR);Unigene0005453(NQR);Unigene0016825(NQR)
GO:0010329	auxin efflux transmembrane transporter activity	0.21643	Unigene0021376(PIN8);Unigene0024083(PIN1A);Unigene0027429(ABCB19)
GO:0015120	phosphoglycerate transmembrane transporter activity	0.21643	Unigene0000659(PPT2);Unigene0031180(TPT);Unigene0035280(TPT)
GO:0018522	benzoyl-CoA reductase activity	0.21643	Unigene0000590(--);Unigene0006184(APSR1);Unigene0018622(--)
GO:0046481	digalactosyldiacylglycerol synthase activity	0.21643	Unigene0008045(DGD1);Unigene0008046(DGD1);Unigene0024997(DGD2)
GO:0071917	triose-phosphate transmembrane transporter activity	0.21643	Unigene0000659(PPT2);Unigene0031180(TPT);Unigene0035280(TPT)
GO:0000107	imidazoleglycerol-phosphate synthase activity	0.21643	Unigene0000027(ctps);Unigene0015656(HISN3);Unigene0018593(PDX1);Unigene0020326(HISN4);Unigene0023865(ASB1);Unigene0023866(XTH28);Unigene0032446(GAT1_2.1);Unigene0034336(PDX1);Unigene0035558(GGP5)
GO:0016307	phosphatidylinositol phosphate kinase activity	0.21643	Unigene0013958(FAB1C);Unigene0017944(FAB1A);Unigene0020496(FAB1B);Unigene0025462(FAB1D);Unigene0031356(PIP5K8);Unigene0031357(PIPK1);Unigene0031448(PIP5K4);Unigene0031943(FAB1B);Unigene0033770(PIP5K1)
GO:0016765	transferase activity, transferring alkyl or aryl (other than methyl) groups	0.231818	Unigene0000464(SPS2);Unigene0000569(IPT5);Unigene0000806(IPT1);Unigene0000947(CHLG);Unigene0001231(PSY1);Unigene0001656(CHLN);Unigene0002594(P4H10);Unigene0003586(At2g17570);Unigene0003793(ADC1);Unigene0003967(CLPX1);Unigene0005366(MGL);Unigene0005374(GGPS1);Unigene0008144(IPT1);Unigene0008804(DTM1);Unigene0014347(IPT5);Unigene0014409(RCS3);Unigene0015285(--);Unigene0015747(DHAR2);Unigene0018357(…
GO:0004144	diacylglycerol O-acyltransferase activity	0.231818	Unigene0007007(WSD1);Unigene0007008(WSD1);Unigene0025205(At1g54570);Unigene0031265(--);Unigene0032781(WSD1);Unigene0034960(WSD1)
GO:0004414	homoserine O-acetyltransferase activity	0.231818	Unigene0000400(PHYLLO);Unigene0004765(--);Unigene0015256(--);Unigene0025429(--);Unigene0033754(rutD);Unigene0033755(--)
GO:0005199	structural constituent of cell wall	0.231818	Unigene0002563(--);Unigene0002702(LRX2);Unigene0004024(--);Unigene0026874(--);Unigene0028356(--);Unigene0030433(--)
GO:0005345	purine nucleobase transmembrane transporter activity	0.231818	Unigene0001116(NAT2);Unigene0010443(PUP5);Unigene0014943(NAT7);Unigene0017479(NAT2);Unigene0021369(NAT6);Unigene0027630(NAT12)
GO:0008812	choline dehydrogenase activity	0.231818	Unigene0005848(HTH);Unigene0025671(THI1);Unigene0025672(THI1-2);Unigene0026767(FAO1);Unigene0027026(HTH);Unigene0034852(SQE1)
GO:0018580	nitronate monooxygenase activity	0.231818	Unigene0005978(GLO1);Unigene0005979(GLO2);Unigene0005980(GLO1);Unigene0009718(GLO5);Unigene0020326(HISN4);Unigene0025852(yrpB)
GO:0016298	lipase activity	0.234501	Unigene0000856(NPC6);Unigene0001308(GLIP7);Unigene0004965(LYPLA1);Unigene0013044(At3g26430);Unigene0014349(PLC4);Unigene0017658(At5g55050);Unigene0024859(At4g16820);Unigene0024982(PPC6-7);Unigene0025961(GRWD1);Unigene0026338(GBF);Unigene0030565(PLC2);Unigene0031103(PLIP2);Unigene0032301(dapb1);Unigene0032525(ATAB2);Unigene0033016(PLC6);Unigene0033017(PLC2);Unigene0033977(NPC2);Unigene0035625(At5g…
GO:0022804	active transmembrane transporter activity	0.234501	Unigene0000226(HMA4);Unigene0000233(NPF8.3);Unigene0000283(ABCG18);Unigene0000445(ABCG11);Unigene0000533(BASS1);Unigene0000565(YMF16);Unigene0000659(PPT2);Unigene0000781(ABCG32);Unigene0000806(IPT1);Unigene0000849(ABCB4);Unigene0001137(NPF6.2);Unigene0001138(NPF6.3);Unigene0001139(NPF6.3);Unigene0001160(STP14);Unigene0001190(--);Unigene0001445(DTX24);Unigene0001456(TIM8);Unigene0001541(SUC1);Unig…
GO:0005319	lipid transporter activity	0.236462	Unigene0000283(ABCG18);Unigene0000445(ABCG11);Unigene0000533(BASS1);Unigene0000781(ABCG32);Unigene0000849(ABCB4);Unigene0002879(BASS2);Unigene0005148(ABCG15);Unigene0006575(ABCG11);Unigene0007936(ABCG11);Unigene0008246(ABCG36);Unigene0008248(PDR1);Unigene0014806(ALA8);Unigene0014934(ABCC4);Unigene0015722(SMC4);Unigene0017133(AKN);Unigene0021761(BASS1);Unigene0022231(ABCG28);Unigene0023607(ABCG39)…
GO:0003978	UDP-glucose 4-epimerase activity	0.239337	Unigene0000288(A1);Unigene0000716(Os04g0179200);Unigene0001276(UXS5);Unigene0001987(CSP41A);Unigene0002762(3BETAHSD/D2);Unigene0003639(EGS1);Unigene0004373(CCR1);Unigene0004610(AXS2);Unigene0010604(UGE2);Unigene0011991(CCR1);Unigene0014012(SDR2b);Unigene0014313(GAE6);Unigene0015306(GAE3);Unigene0015499(CCR1);Unigene0016008(GAE4);Unigene0023694(BETV6);Unigene0025094(GAE1);Unigene0025127(UGE2);Unig…
GO:0004316	3-oxoacyl-[acyl-carrier-protein] reductase (NADPH) activity	0.239337	Unigene0000716(Os04g0179200);Unigene0003765(TIC32);Unigene0004373(CCR1);Unigene0008384(MT0715);Unigene0010197(KCR1);Unigene0012190(TIC32B);Unigene0014012(SDR2b);Unigene0019568(--);Unigene0021357(HSD1);Unigene0025489(cctT);Unigene0025530(CCAMK);Unigene0026168(Os04g0179200);Unigene0028411(CER3);Unigene0028781(NYC1);Unigene0029332(PORC);Unigene0029410(Os04g0179200);Unigene0029589(fabG);Unigene002986…
GO:0015175	neutral amino acid transmembrane transporter activity	0.242337	Unigene0000283(ABCG18);Unigene0000445(ABCG11);Unigene0000781(ABCG32);Unigene0000849(ABCB4);Unigene0003967(CLPX1);Unigene0005148(ABCG15);Unigene0006575(ABCG11);Unigene0007936(ABCG11);Unigene0008246(ABCG36);Unigene0008248(PDR1);Unigene0014934(ABCC4);Unigene0015722(SMC4);Unigene0017133(AKN);Unigene0022231(ABCG28);Unigene0023607(ABCG39);Unigene0024041(ABCI6);Unigene0025224(ABCC9);Unigene0026121(ABCG1…
GO:0003955	NAD(P)H dehydrogenase (quinone) activity	0.246864	Unigene0000428(NQR);Unigene0003612(FQR1);Unigene0005453(NQR);Unigene0013356(At4g36750);Unigene0016825(NQR)
GO:0019842	vitamin binding	0.247512	Unigene0000400(PHYLLO);Unigene0001904(OsI_16936);Unigene0002049(At4g12130);Unigene0002261(PHS1);Unigene0002594(P4H10);Unigene0003082(PDC1);Unigene0004543(--);Unigene0005725(AG118);Unigene0005884(ANT17);Unigene0008535(GAD);Unigene0009219(ACS2);Unigene0009877(GSA);Unigene0011372(TAT);Unigene0011445(TPK2);Unigene0014409(RCS3);Unigene0015282(LCB2a);Unigene0016089(BIO3-BIO1);Unigene0018264(GGAT1);Unig…
GO:0004861	cyclin-dependent protein serine/threonine kinase inhibitor activity	0.247512	Unigene0008520(PSAF);Unigene0020735(KRP7);Unigene0025546(KRP3);Unigene0026407(KRP5)
GO:0015486	glycoside-pentoside-hexuronide:cation symporter activity	0.247512	Unigene0001541(SUC1);Unigene0008125(--);Unigene0021633(SUC4);Unigene0024541(SUC2)
GO:0016855	racemase and epimerase activity, acting on amino acids and derivatives	0.247512	Unigene0001904(OsI_16936);Unigene0026906(POPTR_0012s05040g);Unigene0026907(POPTR_0012s05040g);Unigene0028139(--)
GO:0004520	endodeoxyribonuclease activity	0.253791	Unigene0000283(ABCG18);Unigene0000445(ABCG11);Unigene0000682(RECQL1);Unigene0000781(ABCG32);Unigene0000849(ABCB4);Unigene0000962(EIF4A1);Unigene0002424(APRR5);Unigene0002507(At3g47830);Unigene0004306(MYH);Unigene0005148(ABCG15);Unigene0006575(ABCG11);Unigene0007936(ABCG11);Unigene0008246(ABCG36);Unigene0008248(PDR1);Unigene0008535(GAD);Unigene0010524(FANCM);Unigene0014934(ABCC4);Unigene0017133(AK…
GO:0015930	glutamate synthase activity	0.253791	Unigene0000366(CHLP);Unigene0000625(ZDS);Unigene0005978(GLO1);Unigene0005979(GLO2);Unigene0005980(GLO1);Unigene0007380(At1g12200);Unigene0007939(PAO2);Unigene0009718(GLO5);Unigene0011656(NTR1);Unigene0020507(fadD28);Unigene0022926(CHLP);Unigene0025671(THI1);Unigene0025672(THI1-2);Unigene0025689(ufaA1);Unigene0026030(CRTL-E-1);Unigene0027879(CRTISO);Unigene0029400(--);Unigene0031029(YUC4);Unigene0…
GO:0019203	carbohydrate phosphatase activity	0.265412	Unigene0000925(At3g55800);Unigene0003853(FKFBP);Unigene0004535(SPS1);Unigene0006182(TPPI);Unigene0009286(SPS2);Unigene0011697(TPS1);Unigene0011698(TPS1);Unigene0014262(TPS11);Unigene0014263(TPS11);Unigene0015011(FBP);Unigene0024045(FBPban1);Unigene0025436(TPS6);Unigene0033309(At3g55800);Unigene0034411(TPPJ)
GO:0008667	2,3-dihydro-2,3-dihydroxybenzoate dehydrogenase activity	0.265412	Unigene0000716(Os04g0179200);Unigene0003765(TIC32);Unigene0004373(CCR1);Unigene0008384(MT0715);Unigene0010197(KCR1);Unigene0012190(TIC32B);Unigene0014012(SDR2b);Unigene0016008(GAE4);Unigene0019568(--);Unigene0021357(HSD1);Unigene0025094(GAE1);Unigene0025489(cctT);Unigene0026168(Os04g0179200);Unigene0028781(NYC1);Unigene0029332(PORC);Unigene0029410(Os04g0179200);Unigene0029589(fabG);Unigene0029866…
GO:0004506	squalene monooxygenase activity	0.265412	Unigene0004454(SQE1);Unigene0030222(SQE1);Unigene0031387(MO2);Unigene0033638(SQE1);Unigene0033639(SQE1);Unigene0034852(SQE1);Unigene0035153(MO2)
GO:0016538	cyclin-dependent protein serine/threonine kinase regulator activity	0.265412	Unigene0008520(PSAF);Unigene0011581(CYCT1-1);Unigene0020735(KRP7);Unigene0025546(KRP3);Unigene0026407(KRP5);Unigene0034788(--);Unigene0036489(CKS1)
GO:0043531	ADP binding	0.265412	Unigene0000018(R1A-4);Unigene0000057(R1A-10);Unigene0000083(RPP13L3);Unigene0000085(R1B-16);Unigene0000094(R1B-19);Unigene0000100(R1B-16);Unigene0000152(RPP13L3);Unigene0000231(R1A-10);Unigene0000403(R1A-10);Unigene0000409(R1B-16);Unigene0001883(R1B-14);Unigene0002641(R1A-10);Unigene0002761(LOV1);Unigene0003711(RXW24L);Unigene0003875(R1A-10);Unigene0006230(At3g14460);Unigene0009703(R1A-10);Unigen…
GO:0004088	carbamoyl-phosphate synthase (glutamine-hydrolyzing) activity	0.265412	Unigene0000027(ctps);Unigene0003705(CARB);Unigene0003706(CARB);Unigene0020326(HISN4);Unigene0023865(ASB1);Unigene0023866(XTH28);Unigene0028309(POPTRDRAFT_831870);Unigene0029644(HIPP39);Unigene0032446(GAT1_2.1);Unigene0035558(GGP5)
GO:0003826	alpha-ketoacid dehydrogenase activity	0.265412	Unigene0003368(At5g09300);Unigene0028847(At1g21400)
GO:0004087	carbamoyl-phosphate synthase (ammonia) activity	0.265412	Unigene0003705(CARB);Unigene0003706(CARB)
GO:0005221	intracellular cyclic nucleotide activated cation channel activity	0.265412	Unigene0000168(CNGC2);Unigene0033411(CNGC2)
GO:0005222	intracellular cAMP activated cation channel activity	0.265412	Unigene0000168(CNGC2);Unigene0033411(CNGC2)
GO:0005452	inorganic anion exchanger activity	0.265412	Unigene0032923(BOR1);Unigene0032924(BOR1)
GO:0008429	phosphatidylethanolamine binding	0.265412	Unigene0005642(SYT3);Unigene0027863(SYT3)
GO:0008685	2-C-methyl-D-erythritol 2,4-cyclodiphosphate synthase activity	0.265412	Unigene0002342(ISPF);Unigene0004119(ISPF)
GO:0008974	phosphoribulokinase activity	0.265412	Unigene0019072(At1g32060);Unigene0033008(At1g32060)
GO:0009784	transmembrane receptor histidine kinase activity	0.265412	Unigene0033963(AHK4);Unigene0033966(AHK4)
GO:0009885	transmembrane histidine kinase cytokinin receptor activity	0.265412	Unigene0033963(AHK4);Unigene0033966(AHK4)
GO:0015398	high-affinity secondary active ammonium transmembrane transporter activity	0.265412	Unigene0024641(AMT2);Unigene0024643(AMT2)
GO:0016920	pyroglutamyl-peptidase activity	0.265412	Unigene0027245(--);Unigene0027884(--)
GO:0034069	aminoglycoside N-acetyltransferase activity	0.265412	Unigene0029529(XBAT31);Unigene0031567(p20)
GO:0036381	pyridoxal 5'-phosphate synthase (glutamine hydrolysing) activity	0.265412	Unigene0018593(PDX1);Unigene0034336(PDX1)
GO:0043855	cyclic nucleotide-gated ion channel activity	0.265412	Unigene0000168(CNGC2);Unigene0033411(CNGC2)
GO:0044610	FMN transmembrane transporter activity	0.265412	Unigene0026720(PXN);Unigene0026721(PXN)
GO:0045157	electron transporter, transferring electrons within the noncyclic electron transport pathway of photosynthesis activity	0.265412	Unigene0033207(PETH);Unigene0033208(PETH)
GO:0046423	allene-oxide cyclase activity	0.265412	Unigene0007129(AOC);Unigene0026913(AOC)
GO:0047922	gentisate 1,2-dioxygenase activity	0.265412	Unigene0029088(ERABP1);Unigene0029591(Os09g0568700)
GO:0048531	beta-1,3-galactosyltransferase activity	0.265412	Unigene0018321(GALS1);Unigene0018322(GALS1)
GO:0050023	L-fuconate dehydratase activity	0.265412	Unigene0026906(POPTR_0012s05040g);Unigene0026907(POPTR_0012s05040g)
GO:0050614	delta24-sterol reductase activity	0.265412	Unigene0001771(DIM);Unigene0001772(DIM)
GO:0052622	ATP dimethylallyltransferase activity	0.265412	Unigene0000569(IPT5);Unigene0014347(IPT5)
GO:0052623	ADP dimethylallyltransferase activity	0.265412	Unigene0000569(IPT5);Unigene0014347(IPT5)
GO:0080046	quercetin 4'-O-glucosyltransferase activity	0.265412	Unigene0010472(UGT88B1);Unigene0036099(UGT89B2)
GO:0080122	AMP transmembrane transporter activity	0.265412	Unigene0026720(PXN);Unigene0026721(PXN)
GO:0047262	polygalacturonate 4-alpha-galacturonosyltransferase activity	0.283691	Unigene0002985(GATL7);Unigene0006069(GATL8);Unigene0006070(GATL8);Unigene0010830(GATL3);Unigene0014479(GATL1);Unigene0031722(GATL7);Unigene0031723(GATL7);Unigene0034439(GAUT1)
GO:0016405	CoA-ligase activity	0.283691	Unigene0000616(AAE17);Unigene0003705(CARB);Unigene0003706(CARB);Unigene0004052(LACS1);Unigene0004248(AAE3);Unigene0006550(4CLL1);Unigene0010734(AAE2);Unigene0013983(4CLL9);Unigene0020507(fadD28);Unigene0021227(AAE14);Unigene0022994(4CL1);Unigene0028055(LACS6);Unigene0028506(ACS);Unigene0032247(4CLL7);Unigene0033221(LACS2);Unigene0034830(ACLA-1);Unigene0035273(AAE14)
GO:0009381	excinuclease ABC activity	0.283691	Unigene0000283(ABCG18);Unigene0000445(ABCG11);Unigene0000682(RECQL1);Unigene0000781(ABCG32);Unigene0000849(ABCB4);Unigene0000962(EIF4A1);Unigene0005148(ABCG15);Unigene0006575(ABCG11);Unigene0007936(ABCG11);Unigene0008246(ABCG36);Unigene0008248(PDR1);Unigene0010524(FANCM);Unigene0014934(ABCC4);Unigene0017133(AKN);Unigene0022231(ABCG28);Unigene0023607(ABCG39);Unigene0024041(ABCI6);Unigene0025224(AB…
GO:0031263	amine-transporting ATPase activity	0.283691	Unigene0000283(ABCG18);Unigene0000445(ABCG11);Unigene0000781(ABCG32);Unigene0000849(ABCB4);Unigene0003967(CLPX1);Unigene0005148(ABCG15);Unigene0006575(ABCG11);Unigene0007936(ABCG11);Unigene0008246(ABCG36);Unigene0008248(PDR1);Unigene0014934(ABCC4);Unigene0015722(SMC4);Unigene0017133(AKN);Unigene0022231(ABCG28);Unigene0023607(ABCG39);Unigene0024041(ABCI6);Unigene0025224(ABCC9);Unigene0026121(ABCG1…
GO:0004611	phosphoenolpyruvate carboxykinase activity	0.284834	Unigene0009391(PCK);Unigene0031834(PPC4);Unigene0033484(PCKA);Unigene0034819(PPC1);Unigene0034820(PPC1);Unigene0034821(PPC)
GO:0015205	nucleobase transmembrane transporter activity	0.284834	Unigene0001116(NAT2);Unigene0010443(PUP5);Unigene0014943(NAT7);Unigene0017479(NAT2);Unigene0021369(NAT6);Unigene0027630(NAT12)
GO:0034073	tetrahymanol cyclase activity	0.284834	Unigene0000205(DDS);Unigene0016000(LUS1);Unigene0018577(DDS);Unigene0024117(DDS);Unigene0027130(CASBPX2);Unigene0030343(DDS)
GO:0080043	quercetin 3-O-glucosyltransferase activity	0.301881	Unigene0002467(UGT76B1);Unigene0004161(UGT73D1);Unigene0004162(UGT73C5);Unigene0008119(UGT76B1);Unigene0008842(UGT80B1);Unigene0010472(UGT88B1);Unigene0015497(UGT90A1);Unigene0034996(UGT73C3);Unigene0036099(UGT89B2)
GO:0080044	quercetin 7-O-glucosyltransferase activity	0.301881	Unigene0002467(UGT76B1);Unigene0004161(UGT73D1);Unigene0004162(UGT73C5);Unigene0008119(UGT76B1);Unigene0008842(UGT80B1);Unigene0010472(UGT88B1);Unigene0015497(UGT90A1);Unigene0034996(UGT73C3);Unigene0036099(UGT89B2)
GO:0008378	galactosyltransferase activity	0.31505	Unigene0006322(STS1);Unigene0008045(DGD1);Unigene0008046(DGD1);Unigene0016173(XLT2);Unigene0018321(GALS1);Unigene0018322(GALS1);Unigene0024997(DGD2);Unigene0030533(GP1);Unigene0034090(B3GALT2);Unigene0036296(GOLS2)
GO:0009881	photoreceptor activity	0.31505	Unigene0000499(PHYB);Unigene0004789(PHOT1);Unigene0005580(PHYA1);Unigene0005582(PHYA1);Unigene0005835(PHOT2);Unigene0006014(LPA2);Unigene0006679(PHYB);Unigene0009809(CRY2);Unigene0020529(PHY1);Unigene0035404(--)
GO:0009975	cyclase activity	0.31505	Unigene0000205(DDS);Unigene0007129(AOC);Unigene0016000(LUS1);Unigene0018577(DDS);Unigene0024117(DDS);Unigene0026030(CRTL-E-1);Unigene0026913(AOC);Unigene0027130(CASBPX2);Unigene0030343(DDS);Unigene0030827(DDS)
GO:0004435	phosphatidylinositol phospholipase C activity	0.31774	Unigene0014349(PLC4);Unigene0030565(PLC2);Unigene0032525(ATAB2);Unigene0033016(PLC6);Unigene0033017(PLC2)
GO:0008836	diaminopimelate decarboxylase activity	0.31774	Unigene0003793(ADC1);Unigene0007971(LYSA1);Unigene0019208(ADC1);Unigene0028474(ADC1);Unigene0035512(ADC)
GO:0030291	protein serine/threonine kinase inhibitor activity	0.31774	Unigene0008520(PSAF);Unigene0020735(KRP7);Unigene0025546(KRP3);Unigene0026338(GBF);Unigene0026407(KRP5)
GO:0035250	UDP-galactosyltransferase activity	0.31774	Unigene0008045(DGD1);Unigene0008046(DGD1);Unigene0024997(DGD2);Unigene0030533(GP1);Unigene0036296(GOLS2)
GO:0042907	xanthine transmembrane transporter activity	0.31774	Unigene0001116(NAT2);Unigene0014943(NAT7);Unigene0017479(NAT2);Unigene0021369(NAT6);Unigene0027630(NAT12)
GO:0004499	N,N-dimethylaniline monooxygenase activity	0.318434	Unigene0007380(At1g12200);Unigene0011656(NTR1);Unigene0025689(ufaA1);Unigene0026788(YUC3);Unigene0029400(--);Unigene0031029(YUC4);Unigene0036067(YUC3)
GO:0004568	chitinase activity	0.318434	Unigene0014494(CTL2);Unigene0024730(Cht6);Unigene0024731(EP3);Unigene0025254(CTL1);Unigene0026194(--);Unigene0026196(--);Unigene0026635(CTL1)
GO:0034072	squalene cyclase activity	0.318434	Unigene0000205(DDS);Unigene0016000(LUS1);Unigene0018577(DDS);Unigene0024117(DDS);Unigene0027130(CASBPX2);Unigene0030343(DDS);Unigene0030827(DDS)
GO:0046608	carotenoid isomerase activity	0.318434	Unigene0000625(ZDS);Unigene0003503(At2g24580);Unigene0003504(At2g24580);Unigene0026767(FAO1);Unigene0027879(CRTISO);Unigene0029400(--);Unigene0030463(PYROXD2)
GO:0051007	squalene-hopene cyclase activity	0.318434	Unigene0000205(DDS);Unigene0016000(LUS1);Unigene0018577(DDS);Unigene0024117(DDS);Unigene0027130(CASBPX2);Unigene0030343(DDS);Unigene0030827(DDS)
GO:0004601	peroxidase activity	0.318588	Unigene0000804(PER27);Unigene0002326(PER51);Unigene0004018(CSA);Unigene0004138(PER17);Unigene0010646(PER12);Unigene0015770(CLEB3J9);Unigene0017209(PER46);Unigene0018471(CSA);Unigene0020507(fadD28);Unigene0021077(PER29);Unigene0022255(At1g08170);Unigene0022998(APXT);Unigene0023348(PRXIIE-1);Unigene0027556(PER9);Unigene0028400(PNC1);Unigene0028530(PER31);Unigene0028965(PER29);Unigene0029575(PER21);…
GO:0016634	oxidoreductase activity, acting on the CH-CH group of donors, oxygen as acceptor	0.321235	Unigene0000625(ZDS);Unigene0007380(At1g12200);Unigene0007939(PAO2);Unigene0022229(CPX);Unigene0025671(THI1);Unigene0025672(THI1-2);Unigene0025689(ufaA1);Unigene0027879(CRTISO);Unigene0029400(--);Unigene0029974(PAO1);Unigene0031387(MO2);Unigene0032081(FLCY);Unigene0034852(SQE1);Unigene0036067(YUC3)
GO:0004575	sucrose alpha-glucosidase activity	0.337118	Unigene0016448(INVA);Unigene0033944(GATA8);Unigene0035882(INV*DC4);Unigene0035883(INV*DC4)
GO:0005432	calcium:sodium antiporter activity	0.337118	Unigene0031777(NCL);Unigene0031944(MHX);Unigene0035741(CCX4);Unigene0036173(NCL)
GO:0008964	phosphoenolpyruvate carboxylase activity	0.337118	Unigene0031834(PPC4);Unigene0034819(PPC1);Unigene0034820(PPC1);Unigene0034821(PPC)
GO:0016636	oxidoreductase activity, acting on the CH-CH group of donors, iron-sulfur protein as acceptor	0.337118	Unigene0000590(--);Unigene0006184(APSR1);Unigene0018622(--);Unigene0033442(RCCR)
GO:0017048	Rho GTPase binding	0.337118	Unigene0011450(ROPGEF1);Unigene0015613(ROPGEF14);Unigene0022206(JGB);Unigene0030454(REN1)
GO:0035673	oligopeptide transmembrane transporter activity	0.337118	Unigene0000233(NPF8.3);Unigene0030959(OPT4);Unigene0033335(NPF8.1);Unigene0036311(OPT7)
GO:0045181	glutamate synthase activity, NAD(P)H as acceptor	0.337118	Unigene0000366(CHLP);Unigene0000625(ZDS);Unigene0007380(At1g12200);Unigene0007939(PAO2);Unigene0011656(NTR1);Unigene0020507(fadD28);Unigene0022926(CHLP);Unigene0025671(THI1);Unigene0025672(THI1-2);Unigene0025689(ufaA1);Unigene0026030(CRTL-E-1);Unigene0027879(CRTISO);Unigene0029400(--);Unigene0031029(YUC4);Unigene0033638(SQE1);Unigene0033639(SQE1);Unigene0034852(SQE1);Unigene0036067(YUC3)
GO:0003920	GMP reductase activity	0.337118	Unigene0005978(GLO1);Unigene0005979(GLO2);Unigene0005980(GLO1)
GO:0004425	indole-3-glycerol-phosphate synthase activity	0.337118	Unigene0018593(PDX1);Unigene0034336(PDX1);Unigene0036056(IGPS)
GO:0004467	long-chain fatty acid-CoA ligase activity	0.337118	Unigene0004052(LACS1);Unigene0006550(4CLL1);Unigene0033221(LACS2)
GO:0016713	oxidoreductase activity, acting on paired donors, with incorporation or reduction of molecular oxygen, reduced iron-sulfur protein as one donor, and incorporation of one atom of oxygen	0.337118	Unigene0028174(CYP704B1);Unigene0030684(CYP86A1);Unigene0035544(CYP86A22)
GO:0017084	delta1-pyrroline-5-carboxylate synthetase activity	0.337118	Unigene0025803(TIFY10B);Unigene0032071(pyrH);Unigene0033861(ALDH)
GO:0018577	catechol 2,3-dioxygenase activity	0.337118	Unigene0011018(At1g67280);Unigene0018002(--);Unigene0025706(--)
GO:0018685	alkane 1-monooxygenase activity	0.337118	Unigene0028174(CYP704B1);Unigene0030684(CYP86A1);Unigene0035544(CYP86A22)
GO:0019114	catechol dioxygenase activity	0.337118	Unigene0011018(At1g67280);Unigene0018002(--);Unigene0025706(--)
GO:0031956	medium-chain fatty acid-CoA ligase activity	0.337118	Unigene0004052(LACS1);Unigene0006550(4CLL1);Unigene0033221(LACS2)
GO:0043878	glyceraldehyde-3-phosphate dehydrogenase (NAD+) (non-phosphorylating) activity	0.337118	Unigene0001820(ALDH7B4);Unigene0024161(ALDH2B4);Unigene0025643(ALDH2C4)
GO:0047100	glyceraldehyde-3-phosphate dehydrogenase (NADP+) (phosphorylating) activity	0.337118	Unigene0024204(GAPA1);Unigene0024206(GAPA1);Unigene0029840(GAPB)
GO:0050664	oxidoreductase activity, acting on NAD(P)H, oxygen as acceptor	0.337118	Unigene0030316(RBOHF);Unigene0031554(RBOHC);Unigene0036644(RBOHC)
GO:0080161	auxin transmembrane transporter activity	0.337118	Unigene0021376(PIN8);Unigene0024083(PIN1A);Unigene0027429(ABCB19)
GO:1990136	linoleate 9S-lipoxygenase activity	0.337118	Unigene0002838(LOX1.5);Unigene0027958(LOX5);Unigene0027959(LOX1)
GO:0008678	2-deoxy-D-gluconate 3-dehydrogenase activity	0.349528	Unigene0000716(Os04g0179200);Unigene0003765(TIC32);Unigene0008384(MT0715);Unigene0010197(KCR1);Unigene0012190(TIC32B);Unigene0014012(SDR2b);Unigene0021357(HSD1);Unigene0025489(cctT);Unigene0025530(CCAMK);Unigene0026168(Os04g0179200);Unigene0028781(NYC1);Unigene0029332(PORC);Unigene0029410(Os04g0179200);Unigene0029589(fabG);Unigene0029866(Os04g0179200);Unigene0029867(Os04g0179200);Unigene0030699(D…
GO:0004355	glutamate synthase (NADPH) activity	0.350245	Unigene0000366(CHLP);Unigene0000625(ZDS);Unigene0007380(At1g12200);Unigene0011656(NTR1);Unigene0020507(fadD28);Unigene0022926(CHLP);Unigene0025671(THI1);Unigene0025672(THI1-2);Unigene0026030(CRTL-E-1);Unigene0027879(CRTISO);Unigene0029400(--);Unigene0033638(SQE1);Unigene0033639(SQE1);Unigene0034852(SQE1);Unigene0036067(YUC3)
GO:0004757	sepiapterin reductase activity	0.350245	Unigene0000716(Os04g0179200);Unigene0003765(TIC32);Unigene0008384(MT0715);Unigene0010197(KCR1);Unigene0012190(TIC32B);Unigene0014012(SDR2b);Unigene0021357(HSD1);Unigene0028781(NYC1);Unigene0029332(PORC);Unigene0029589(fabG);Unigene0030699(DHRS12);Unigene0033190(TIC32);Unigene0033191(TIC32);Unigene0034535(SDR1);Unigene0036511(ucpA)
GO:0004452	isopentenyl-diphosphate delta-isomerase activity	0.350591	Unigene0001594(IPI2);Unigene0005350(NUDT3);Unigene0005978(GLO1);Unigene0005979(GLO2);Unigene0005980(GLO1);Unigene0009718(GLO5)
GO:0004736	pyruvate carboxylase activity	0.350591	Unigene0003705(CARB);Unigene0003706(CARB);Unigene0004784(EMB3003);Unigene0007304(HMGCL);Unigene0026216(BCCP1);Unigene0028309(POPTRDRAFT_831870)
GO:0015307	drug:proton antiporter activity	0.355095	Unigene0001160(STP14);Unigene0011854(PLT6);Unigene0022847(MSSP2);Unigene0026777(PHT4;4);Unigene0026778(PHT4;4);Unigene0028289(MFSD14A);Unigene0028348(MFSD14A);Unigene0030456(MSSP2);Unigene0031040(At3g47420);Unigene0032691(STP13);Unigene0035849(At5g59250)
GO:0004185	serine-type carboxypeptidase activity	0.355709	Unigene0000091(SCPL19);Unigene0001093(SCPL50);Unigene0005689(SCPL45);Unigene0023617(SCPL34);Unigene0030258(SCPL42);Unigene0030948(SCPL40);Unigene0030994(SCPL29);Unigene0031437(SCPL18);Unigene0034999(SCPL18);Unigene0035833(SCPL45);Unigene0036399(SCPL18);Unigene0036497(SCP26)
GO:0016627	oxidoreductase activity, acting on the CH-CH group of donors	0.35868	Unigene0000337(DVR);Unigene0000366(CHLP);Unigene0000590(--);Unigene0000625(ZDS);Unigene0000716(Os04g0179200);Unigene0001771(DIM);Unigene0001772(DIM);Unigene0003765(TIC32);Unigene0004373(CCR1);Unigene0005128(ECR);Unigene0005869(srd5a3);Unigene0005978(GLO1);Unigene0005980(GLO1);Unigene0006184(APSR1);Unigene0007380(At1g12200);Unigene0007939(PAO2);Unigene0008384(MT0715);Unigene0009718(GLO5);Unigene00…
GO:0016866	intramolecular transferase activity	0.362413	Unigene0000205(DDS);Unigene0000386(ICS2);Unigene0000625(ZDS);Unigene0001259(CBF5);Unigene0002914(SGPP);Unigene0003840(PGM1);Unigene0005725(AG118);Unigene0005837(AMY1.1);Unigene0007167(ASA1);Unigene0007380(At1g12200);Unigene0007939(PAO2);Unigene0009877(GSA);Unigene0013097(CM3);Unigene0014085(SBEI);Unigene0014321(GPP2);Unigene0014414(CCT8);Unigene0016000(LUS1);Unigene0016089(BIO3-BIO1);Unigene00172…
GO:0071949	FAD binding	0.373333	Unigene0000366(CHLP);Unigene0000625(ZDS);Unigene0007380(At1g12200);Unigene0009809(CRY2);Unigene0011656(NTR1);Unigene0020507(fadD28);Unigene0022926(CHLP);Unigene0025671(THI1);Unigene0025672(THI1-2);Unigene0025689(ufaA1);Unigene0026767(FAO1);Unigene0026788(YUC3);Unigene0029400(--);Unigene0030222(SQE1);Unigene0031029(YUC4);Unigene0031387(MO2);Unigene0033638(SQE1);Unigene0033639(SQE1);Unigene0034852(…
GO:0016878	acid-thiol ligase activity	0.379998	Unigene0000616(AAE17);Unigene0003705(CARB);Unigene0003706(CARB);Unigene0004052(LACS1);Unigene0004248(AAE3);Unigene0006550(4CLL1);Unigene0010734(AAE2);Unigene0013983(4CLL9);Unigene0020507(fadD28);Unigene0021227(AAE14);Unigene0022994(4CL1);Unigene0028055(LACS6);Unigene0028506(ACS);Unigene0032247(4CLL7);Unigene0033221(LACS2);Unigene0034830(ACLA-1);Unigene0035273(AAE14)
GO:0001228	transcriptional activator activity, RNA polymerase II transcription regulatory region sequence-specific binding	0.379998	Unigene0004037(BHLH130);Unigene0010877(GATA9);Unigene0019442(BHLH122);Unigene0031128(GATA17);Unigene0031368(GATA17);Unigene0033945(GATA9);Unigene0034642(GATA15)
GO:0050308	sugar-phosphatase activity	0.379998	Unigene0000925(At3g55800);Unigene0003853(FKFBP);Unigene0004535(SPS1);Unigene0009286(SPS2);Unigene0015011(FBP);Unigene0024045(FBPban1);Unigene0033309(At3g55800)
GO:0022853	active ion transmembrane transporter activity	0.38717	Unigene0003716(VHA-c''1);Unigene0004478(RAN1);Unigene0004957(HMA4);Unigene0009623(ATPC);Unigene0011512(LCA1);Unigene0016702(--);Unigene0016838(LSI2);Unigene0018086(PMA4);Unigene0018232(ATPD);Unigene0023155(--);Unigene0025128(PAA2);Unigene0026912(VHA-a3);Unigene0028066(ACA8);Unigene0029361(VHA-a3);Unigene0030797(VATE);Unigene0035906(PMA3)
GO:0018835	carbon phosphorus lyase activity	0.401832	Unigene0000283(ABCG18);Unigene0000445(ABCG11);Unigene0000781(ABCG32);Unigene0000849(ABCB4);Unigene0005148(ABCG15);Unigene0006575(ABCG11);Unigene0007936(ABCG11);Unigene0008246(ABCG36);Unigene0008248(PDR1);Unigene0014934(ABCC4);Unigene0022231(ABCG28);Unigene0023607(ABCG39);Unigene0024041(ABCI6);Unigene0025224(ABCC9);Unigene0026121(ABCG15);Unigene0026898(ABCG28);Unigene0027166(ABCG3);Unigene0027403(…
GO:0015113	nitrite transmembrane transporter activity	0.403611	Unigene0006412(CLC-A);Unigene0014102(OCT7);Unigene0022847(MSSP2);Unigene0029519(MFSD14B);Unigene0032561(NRT2.5)
GO:0033828	glucosylglycerol-phosphate synthase activity	0.403611	Unigene0011697(TPS1);Unigene0011698(TPS1);Unigene0014262(TPS11);Unigene0014263(TPS11);Unigene0025436(TPS6)
GO:0016638	oxidoreductase activity, acting on the CH-NH2 group of donors	0.404256	Unigene0000366(CHLP);Unigene0000625(ZDS);Unigene0005978(GLO1);Unigene0005979(GLO2);Unigene0005980(GLO1);Unigene0007380(At1g12200);Unigene0007939(PAO2);Unigene0009718(GLO5);Unigene0011656(NTR1);Unigene0018542(AO1);Unigene0018543(At1g62810);Unigene0019102(FOLD4);Unigene0020507(fadD28);Unigene0021650(BHLH62);Unigene0022926(CHLP);Unigene0023243(--);Unigene0024517(ACO1);Unigene0024887(yhiN);Unigene002…
GO:0008689	3-demethylubiquinone-9 3-O-methyltransferase activity	0.449726	Unigene0001656(CHLN);Unigene0007200(arsM);Unigene0012800(--);Unigene0013143(SMT2);Unigene0013144(SMT2);Unigene0019007(HEN1);Unigene0019244(PRMT3);Unigene0024208(EEF1AKNMT);Unigene0024767(RNS1);Unigene0024781(MENG);Unigene0025689(ufaA1);Unigene0026894(RID2);Unigene0027186(SMT1);Unigene0030853(mettl21a);Unigene0033701(CHLM)
GO:0061542	3-demethylubiquinone-n 3-O-methyltransferase activity	0.449726	Unigene0001656(CHLN);Unigene0007200(arsM);Unigene0012800(--);Unigene0013143(SMT2);Unigene0013144(SMT2);Unigene0019007(HEN1);Unigene0019244(PRMT3);Unigene0024208(EEF1AKNMT);Unigene0024767(RNS1);Unigene0024781(MENG);Unigene0025689(ufaA1);Unigene0026894(RID2);Unigene0027186(SMT1);Unigene0030853(mettl21a);Unigene0033701(CHLM)
GO:0004837	tyrosine decarboxylase activity	0.449726	Unigene0002550(TYDC2);Unigene0002551(TYDC1);Unigene0008535(GAD);Unigene0011372(TAT);Unigene0017021(GAD);Unigene0019878(NIFS1)
GO:0004857	enzyme inhibitor activity	0.463593	Unigene0000219(PME40);Unigene0001924(PMEI7);Unigene0003174(PMEI11);Unigene0004024(--);Unigene0004331(ASP);Unigene0005485(PECS-1.1);Unigene0008203(--);Unigene0008520(PSAF);Unigene0008694(--);Unigene0009264(PME34);Unigene0011455(PMEI4);Unigene0012248(PMEU1);Unigene0013244(--);Unigene0014265(PMEI11);Unigene0016405(CYS5);Unigene0016658(PMEI4);Unigene0017706(PME28);Unigene0018622(--);Unigene0018885(CI…
GO:0009882	blue light photoreceptor activity	0.463593	Unigene0004789(PHOT1);Unigene0005835(PHOT2);Unigene0009809(CRY2);Unigene0035404(--)
GO:0030546	receptor activator activity	0.463593	Unigene0008297(RALFL19);Unigene0020387(RALFL32);Unigene0031458(PSK6);Unigene0035510(PSK6)
GO:0045300	acyl-[acyl-carrier-protein] desaturase activity	0.463593	Unigene0000726(CRD1);Unigene0003428(ACPD);Unigene0028213(ACPD);Unigene0035956(ACPD)
GO:0048018	receptor agonist activity	0.463593	Unigene0008297(RALFL19);Unigene0020387(RALFL32);Unigene0031458(PSK6);Unigene0035510(PSK6)
GO:0090599	alpha-glucosidase activity	0.463593	Unigene0016448(INVA);Unigene0033944(GATA8);Unigene0035882(INV*DC4);Unigene0035883(INV*DC4)
GO:0016846	carbon-sulfur lyase activity	0.463593	Unigene0005366(MGL);Unigene0009219(ACS2);Unigene0009853(TAR4);Unigene0009854(TAR4);Unigene0011018(At1g67280);Unigene0017632(ANL2);Unigene0017943(Cenpv);Unigene0018002(--);Unigene0018109(T85);Unigene0018357(PCAS-1);Unigene0021538(HSA32);Unigene0032041(CGS1);Unigene0036399(SCPL18)
GO:0004805	trehalose-phosphatase activity	0.467612	Unigene0006182(TPPI);Unigene0011697(TPS1);Unigene0011698(TPS1);Unigene0014262(TPS11);Unigene0014263(TPS11);Unigene0025436(TPS6);Unigene0034411(TPPJ)
GO:0046912	transferase activity, transferring acyl groups, acyl groups converted into alkyl on transfer	0.470661	Unigene0000400(PHYLLO);Unigene0001359(APUM7);Unigene0003070(CHS);Unigene0003082(PDC1);Unigene0003642(HMGS);Unigene0003647(KAS3B);Unigene0005416(--);Unigene0005853(--);Unigene0007304(HMGCL);Unigene0011506(CHS);Unigene0013235(MLS);Unigene0026923(RPS5)
GO:0042578	phosphoric ester hydrolase activity	0.472256	Unigene0000083(RPP13L3);Unigene0000226(HMA4);Unigene0000691(APS1);Unigene0000759(RAM2);Unigene0000856(NPC6);Unigene0000925(At3g55800);Unigene0001534(NT5C3B);Unigene0001571(HMA5);Unigene0001720(--);Unigene0001824(GDPDL3);Unigene0002281(NUDT25);Unigene0002914(SGPP);Unigene0003368(At5g09300);Unigene0003370(SAL1);Unigene0003853(FKFBP);Unigene0004070(GPAT6);Unigene0004478(RAN1);Unigene0004535(SPS1);Un…
GO:0015297	antiporter activity	0.473356	Unigene0000659(PPT2);Unigene0001160(STP14);Unigene0001445(DTX24);Unigene0001697(DTX24);Unigene0002718(DTX25);Unigene0003120(CAX3);Unigene0006337(DTX24);Unigene0008292(At1g31830);Unigene0011854(PLT6);Unigene0012167(At1g31830);Unigene0014626(UTR4);Unigene0016384(DTX27);Unigene0017883(DTX14);Unigene0019198(MT-ND4);Unigene0019900(CAT9);Unigene0020666(MT-ND2);Unigene0020751(NHX2);Unigene0022071(DTX53)…
GO:0016168	chlorophyll binding	0.474959	Unigene0011179(LHCB4.1);Unigene0023022(LHCA5);Unigene0023108(LHCA1);Unigene0028076(CAB13);Unigene0032113(CAB37);Unigene0032114(CAB37);Unigene0034817(LHCB5);Unigene0035463(CAP10A)
GO:0045152	antisigma factor binding	0.474959	Unigene0003273(SULTR3;4);Unigene0010051(ARASP);Unigene0021750(CTPA2);Unigene0023729(DEGP10);Unigene0025481(CTPA3);Unigene0025584(SULTR3;1);Unigene0031699(ST3);Unigene0032602(DEGP2)
GO:0018467	formaldehyde dehydrogenase activity	0.477071	Unigene0002191(CAD1);Unigene0013663(8HGO);Unigene0015726(At5g42250);Unigene0029719(ADH1);Unigene0029720(ADH1);Unigene0031033(SDH);Unigene0033505(ADH1);Unigene0034267(EO);Unigene0035073(10HGO)
GO:0008171	O-methyltransferase activity	0.477071	Unigene0001656(CHLN);Unigene0004700(mrm1);Unigene0007200(arsM);Unigene0012145(COMT2);Unigene0012146(COMT1);Unigene0012800(--);Unigene0013143(SMT2);Unigene0013144(SMT2);Unigene0013321(COMT);Unigene0016993(EXL3);Unigene0017004(ROMT-15);Unigene0017199(PIMT1);Unigene0017272(ASMT);Unigene0018579(CCOAOMT1);Unigene0019007(HEN1);Unigene0019244(PRMT3);Unigene0021574(--);Unigene0024208(EEF1AKNMT);Unigene00…
GO:0016645	oxidoreductase activity, acting on the CH-NH group of donors	0.477071	Unigene0000428(NQR);Unigene0000625(ZDS);Unigene0001111(GAPN);Unigene0001820(ALDH7B4);Unigene0003503(At2g24580);Unigene0003504(At2g24580);Unigene0005453(NQR);Unigene0007380(At1g12200);Unigene0011117(CKX3);Unigene0016825(NQR);Unigene0019102(FOLD4);Unigene0023151(CKX7);Unigene0024161(ALDH2B4);Unigene0025643(ALDH2C4);Unigene0025671(THI1);Unigene0025672(THI1-2);Unigene0025689(ufaA1);Unigene0026030(CRT…
GO:0051213	dioxygenase activity	0.477167	Unigene0000369(At5g51310);Unigene0000759(RAM2);Unigene0002302(HPD);Unigene0002594(P4H10);Unigene0002838(LOX1.5);Unigene0003354(SRG1);Unigene0004102(HSPRO2);Unigene0005884(ANT17);Unigene0006166(LE);Unigene0007008(WSD1);Unigene0007680(ABP19A);Unigene0010630(pKIWI502);Unigene0010804(--);Unigene0010881(NCED2);Unigene0011018(At1g67280);Unigene0011898(LOX1.5);Unigene0013277(At5g58090);Unigene0015345(CC…
GO:0046983	protein dimerization activity	0.477386	Unigene0000445(ABCG11);Unigene0000499(PHYB);Unigene0000786(At1g07660);Unigene0000890(PRE6);Unigene0001005(Solyc04g005320);Unigene0001222(TPR1);Unigene0001748(BIM1);Unigene0001904(OsI_16936);Unigene0002483(BIM1);Unigene0003243(--);Unigene0003803(--);Unigene0004037(BHLH130);Unigene0004255(BHLH48);Unigene0004256(BHLH60);Unigene0005402(TIC21);Unigene0005580(PHYA1);Unigene0005582(PHYA1);Unigene0005879…
GO:0003905	alkylbase DNA N-glycosylase activity	0.477386	Unigene0003849(HCC2);Unigene0029528(WRKY40);Unigene0031733(tag)
GO:0004375	glycine dehydrogenase (decarboxylating) activity	0.477386	Unigene0023243(--);Unigene0025901(At3g61360);Unigene0031133(GLDP1)
GO:0008515	sucrose transmembrane transporter activity	0.477386	Unigene0001541(SUC1);Unigene0021633(SUC4);Unigene0024541(SUC2)
GO:0008725	DNA-3-methyladenine glycosylase activity	0.477386	Unigene0003849(HCC2);Unigene0029528(WRKY40);Unigene0031733(tag)
GO:0009922	fatty acid elongase activity	0.477386	Unigene0005128(ECR);Unigene0019973(DDB_G0272012);Unigene0020839(KCS1)
GO:0016642	oxidoreductase activity, acting on the CH-NH2 group of donors, disulfide as acceptor	0.477386	Unigene0023243(--);Unigene0025901(At3g61360);Unigene0031133(GLDP1)
GO:0043733	DNA-3-methylbase glycosylase activity	0.477386	Unigene0003849(HCC2);Unigene0029528(WRKY40);Unigene0031733(tag)
GO:0045735	nutrient reservoir activity	0.477386	Unigene0011983(GLP7);Unigene0022151(GIP2);Unigene0029361(VHA-a3)
GO:0047465	N-acylglucosamine-6-phosphate 2-epimerase activity	0.477386	Unigene0018593(PDX1);Unigene0034336(PDX1);Unigene0036056(IGPS)
GO:0090447	glycerol-3-phosphate 2-O-acyltransferase activity	0.477386	Unigene0000759(RAM2);Unigene0004070(GPAT6);Unigene0008889(RAM2)
GO:0003825	alpha,alpha-trehalose-phosphate synthase (UDP-forming) activity	0.477386	Unigene0011697(TPS1);Unigene0011698(TPS1);Unigene0014262(TPS11);Unigene0014263(TPS11);Unigene0025436(TPS6)
GO:0004015	adenosylmethionine-8-amino-7-oxononanoate transaminase activity	0.477386	Unigene0005725(AG118);Unigene0009877(GSA);Unigene0011372(TAT);Unigene0016089(BIO3-BIO1);Unigene0020279(AGT2)
GO:0004719	protein-L-isoaspartate (D-aspartate) O-methyltransferase activity	0.477386	Unigene0013143(SMT2);Unigene0013144(SMT2);Unigene0017004(ROMT-15);Unigene0017199(PIMT1);Unigene0024781(MENG)
GO:0009001	serine O-acetyltransferase activity	0.477386	Unigene0005762(CRK26);Unigene0018646(SAT3);Unigene0020015(SAT1);Unigene0025853(SAT3);Unigene0031321(SAT3)
GO:0010333	terpene synthase activity	0.477386	Unigene0007543(ZIS);Unigene0015067(TPS7);Unigene0028887(TPS10);Unigene0030448(STPS3);Unigene0030726(CDS)
GO:0016412	serine O-acyltransferase activity	0.477386	Unigene0005762(CRK26);Unigene0018646(SAT3);Unigene0020015(SAT1);Unigene0025853(SAT3);Unigene0031321(SAT3)
GO:0042562	hormone binding	0.477386	Unigene0001435(IREG2);Unigene0009608(T85);Unigene0018109(T85);Unigene0018880(CEPR1);Unigene0029088(ERABP1)
GO:0008831	dTDP-4-dehydrorhamnose reductase activity	0.477386	Unigene0000365(FAR2);Unigene0002762(3BETAHSD/D2);Unigene0004610(AXS2);Unigene0006461(FAR2);Unigene0010604(UGE2);Unigene0014012(SDR2b);Unigene0014313(GAE6);Unigene0015306(GAE3);Unigene0016008(GAE4);Unigene0025094(GAE1);Unigene0025127(UGE2);Unigene0030796(CSP41B);Unigene0031300(RHM1)
GO:0015079	potassium ion transmembrane transporter activity	0.477386	Unigene0000168(CNGC2);Unigene0000226(HMA4);Unigene0001571(HMA5);Unigene0002869(CNGC18);Unigene0004478(RAN1);Unigene0004957(HMA4);Unigene0007316(ALA9);Unigene0011512(LCA1);Unigene0012869(ACA13);Unigene0014806(ALA8);Unigene0017600(CIPK23);Unigene0017954(SKOR);Unigene0018086(PMA4);Unigene0019113(ALA7);Unigene0021467(CNGC4);Unigene0024321(NPF7.3);Unigene0025128(PAA2);Unigene0025445(CNGC15C);Unigene00…
GO:0003863	3-methyl-2-oxobutanoate dehydrogenase (2-methylpropanoyl-transferring) activity	0.477386	Unigene0003368(At5g09300);Unigene0028847(At1g21400)
GO:0004126	cytidine deaminase activity	0.477386	Unigene0000794(CDA1);Unigene0024813(CDA1)
GO:0004321	fatty-acyl-CoA synthase activity	0.477386	Unigene0013983(4CLL9);Unigene0032247(4CLL7)
GO:0004348	glucosylceramidase activity	0.477386	Unigene0026653(Gba2);Unigene0029858(GBA2)
GO:0004417	hydroxyethylthiazole kinase activity	0.477386	Unigene0002323(VIT_05s0020g02800);Unigene0025138(THIM)
GO:0004557	alpha-galactosidase activity	0.477386	Unigene0029271(AGAL3);Unigene0029272(AGAL3)
GO:0005089	Rho guanyl-nucleotide exchange factor activity	0.477386	Unigene0011450(ROPGEF1);Unigene0015613(ROPGEF14)
GO:0008466	glycogenin glucosyltransferase activity	0.477386	Unigene0012589(GUX2);Unigene0036296(GOLS2)
GO:0008479	queuine tRNA-ribosyltransferase activity	0.477386	Unigene0009226(qtrt1);Unigene0016008(GAE4)
GO:0008506	sucrose:proton symporter activity	0.477386	Unigene0001541(SUC1);Unigene0024541(SUC2)
GO:0008664	2'-5'-RNA ligase activity	0.477386	Unigene0032278(ZBP14);Unigene0035402(At1g03050)
GO:0009669	sucrose:monovalent cation symporter activity	0.477386	Unigene0001541(SUC1);Unigene0024541(SUC2)
GO:0009824	AMP dimethylallyltransferase activity	0.477386	Unigene0000569(IPT5);Unigene0014347(IPT5)
GO:0009883	red or far-red light photoreceptor activity	0.477386	Unigene0005580(PHYA1);Unigene0005582(PHYA1)
GO:0015228	coenzyme A transmembrane transporter activity	0.477386	Unigene0026720(PXN);Unigene0026721(PXN)
GO:0015229	L-ascorbic acid transporter activity	0.477386	Unigene0026777(PHT4;4);Unigene0026778(PHT4;4)
GO:0015230	FAD transmembrane transporter activity	0.477386	Unigene0026720(PXN);Unigene0026721(PXN)
GO:0015651	quaternary ammonium group transmembrane transporter activity	0.477386	Unigene0009423(OCT1);Unigene0024576(PYL2)
GO:0016503	pheromone receptor activity	0.477386	Unigene0000231(R1A-10);Unigene0028569(OFUT23)
GO:0016905	myosin heavy chain kinase activity	0.477386	Unigene0019131(JGB);Unigene0032677(JGB)
GO:0018812	3-hydroxyacyl-CoA dehydratase activity	0.477386	Unigene0019243(PAS2);Unigene0024444(HACD2)
GO:0030742	GTP-dependent protein binding	0.477386	Unigene0014532(RABC2A);Unigene0032510(RABC2A)
GO:0031516	far-red light photoreceptor activity	0.477386	Unigene0005580(PHYA1);Unigene0005582(PHYA1)
GO:0032029	myosin tail binding	0.477386	Unigene0014532(RABC2A);Unigene0032510(RABC2A)
GO:0032036	myosin heavy chain binding	0.477386	Unigene0014532(RABC2A);Unigene0032510(RABC2A)
GO:0032422	purine-rich negative regulatory element binding	0.477386	Unigene0016572(PURA1);Unigene0016574(PURA1)
GO:0042937	tripeptide transporter activity	0.477386	Unigene0000233(NPF8.3);Unigene0033335(NPF8.1)
GO:0043714	(R)-citramalate synthase activity	0.477386	Unigene0005853(--);Unigene0007304(HMGCL)
GO:0045486	naringenin 3-dioxygenase activity	0.477386	Unigene0023387(FL);Unigene0027521(DMR6)
GO:0045551	cinnamyl-alcohol dehydrogenase activity	0.477386	Unigene0002191(CAD1);Unigene0007956(CAD6)
GO:0050097	methylaspartate mutase activity	0.477386	Unigene0030736(At1g20300);Unigene0034547(--)
GO:0050278	sedoheptulose-bisphosphatase activity	0.477386	Unigene0000925(At3g55800);Unigene0033309(At3g55800)
GO:0050378	UDP-glucuronate 4-epimerase activity	0.477386	Unigene0014313(GAE6);Unigene0016008(GAE4)
GO:0051019	mitogen-activated protein kinase binding	0.477386	Unigene0002106(BZIP34);Unigene0019977(--)
GO:0051724	NAD transporter activity	0.477386	Unigene0026720(PXN);Unigene0026721(PXN)
GO:0052692	raffinose alpha-galactosidase activity	0.477386	Unigene0029271(AGAL3);Unigene0029272(AGAL3)
GO:0052747	sinapyl alcohol dehydrogenase activity	0.477386	Unigene0002191(CAD1);Unigene0007956(CAD6)
GO:0052855	ADP-dependent NAD(P)H-hydrate dehydratase activity	0.477386	Unigene0002323(VIT_05s0020g02800);Unigene0025138(THIM)
GO:0071077	adenosine 3',5'-bisphosphate transmembrane transporter activity	0.477386	Unigene0026720(PXN);Unigene0026721(PXN)
GO:0080115	myosin XI tail binding	0.477386	Unigene0014532(RABC2A);Unigene0032510(RABC2A)
GO:0004620	phospholipase activity	0.478404	Unigene0000856(NPC6);Unigene0014349(PLC4);Unigene0024859(At4g16820);Unigene0026338(GBF);Unigene0030565(PLC2);Unigene0032525(ATAB2);Unigene0033016(PLC6);Unigene0033017(PLC2);Unigene0033977(NPC2);Unigene0035897(NPC3);Unigene0035956(ACPD)
GO:0048029	monosaccharide binding	0.478404	Unigene0002594(P4H10);Unigene0004761(REM1.4);Unigene0005839(HXK1);Unigene0005884(ANT17);Unigene0023387(FL);Unigene0024045(FBPban1);Unigene0024517(ACO1);Unigene0027521(DMR6);Unigene0030443(GALAK);Unigene0033509(HXK2);Unigene0036296(GOLS2)
GO:0004133	glycogen debranching enzyme activity	0.482262	Unigene0005837(AMY1.1);Unigene0014085(SBEI);Unigene0017232(AMY2);Unigene0022224(PU1);Unigene0029858(GBA2);Unigene0032534(SBE3)
GO:0016838	carbon-oxygen lyase activity, acting on phosphates	0.486137	Unigene0000700(At3g02650);Unigene0001904(OsI_16936);Unigene0007543(ZIS);Unigene0014409(RCS3);Unigene0015067(TPS7);Unigene0018357(PCAS-1);Unigene0028887(TPS10);Unigene0030448(STPS3);Unigene0030726(CDS);Unigene0032408(RING1)
GO:0010340	carboxyl-O-methyltransferase activity	0.491934	Unigene0013143(SMT2);Unigene0013144(SMT2);Unigene0016993(EXL3);Unigene0017004(ROMT-15);Unigene0017199(PIMT1);Unigene0021574(--);Unigene0024781(MENG)
GO:0051998	protein carboxyl O-methyltransferase activity	0.491934	Unigene0013143(SMT2);Unigene0013144(SMT2);Unigene0016993(EXL3);Unigene0017004(ROMT-15);Unigene0017199(PIMT1);Unigene0021574(--);Unigene0024781(MENG)
GO:0016614	oxidoreductase activity, acting on CH-OH group of donors	0.492828	Unigene0000288(A1);Unigene0000365(FAR2);Unigene0000496(FDH1);Unigene0000716(Os04g0179200);Unigene0001080(At1g30700);Unigene0001118(HCF244);Unigene0001276(UXS5);Unigene0001453(COR2);Unigene0001771(DIM);Unigene0001772(DIM);Unigene0002191(CAD1);Unigene0002762(3BETAHSD/D2);Unigene0003263(At1g56190);Unigene0003503(At2g24580);Unigene0003504(At2g24580);Unigene0003639(EGS1);Unigene0003765(TIC32);Unigene0…
GO:0016630	protochlorophyllide reductase activity	0.499051	Unigene0000716(Os04g0179200);Unigene0003765(TIC32);Unigene0012190(TIC32B);Unigene0014012(SDR2b);Unigene0021357(HSD1);Unigene0025489(cctT);Unigene0029332(PORC);Unigene0029410(Os04g0179200);Unigene0029866(Os04g0179200);Unigene0030699(DHRS12);Unigene0033190(TIC32);Unigene0033191(TIC32);Unigene0034535(SDR1);Unigene0036511(ucpA)
GO:0051287	NAD binding	0.503491	Unigene0000288(A1);Unigene0000365(FAR2);Unigene0000496(FDH1);Unigene0000716(Os04g0179200);Unigene0001118(HCF244);Unigene0001276(UXS5);Unigene0002191(CAD1);Unigene0002762(3BETAHSD/D2);Unigene0003504(At2g24580);Unigene0003765(TIC32);Unigene0004316(UGD2);Unigene0004373(CCR1);Unigene0004610(AXS2);Unigene0006461(FAR2);Unigene0007956(CAD6);Unigene0008384(MT0715);Unigene0010197(KCR1);Unigene0010604(UGE2…
GO:0032559	adenyl ribonucleotide binding	0.517305	Unigene0000008(CRK5);Unigene0000018(R1A-4);Unigene0000020(XI-F);Unigene0000023(At5g35370);Unigene0000027(ctps);Unigene0000029(At1g56140);Unigene0000030(At1g56140);Unigene0000057(R1A-10);Unigene0000074(PTI13);Unigene0000083(RPP13L3);Unigene0000085(R1B-16);Unigene0000094(R1B-19);Unigene0000100(R1B-16);Unigene0000151(LON1);Unigene0000152(RPP13L3);Unigene0000168(CNGC2);Unigene0000231(R1A-10);Unigene0…
GO:0070279	vitamin B6 binding	0.528792	Unigene0001904(OsI_16936);Unigene0002261(PHS1);Unigene0005725(AG118);Unigene0008535(GAD);Unigene0009219(ACS2);Unigene0009877(GSA);Unigene0011372(TAT);Unigene0014409(RCS3);Unigene0015282(LCB2a);Unigene0016089(BIO3-BIO1);Unigene0018264(GGAT1);Unigene0019878(NIFS1);Unigene0020279(AGT2);Unigene0025833(SHM1);Unigene0025834(SHM1);Unigene0027160(PHS2);Unigene0028034(At5g53970);Unigene0030551(trpB2)
GO:0070569	uridylyltransferase activity	0.528792	Unigene0000020(XI-F);Unigene0005762(CRK26);Unigene0011111(USP);Unigene0012178(OsI_027381);Unigene0012327(STY46);Unigene0014082(ACR1);Unigene0017713(SCRM);Unigene0018646(SAT3);Unigene0020015(SAT1);Unigene0021418(ADG2);Unigene0023961(ATH1);Unigene0025523(BHLH93);Unigene0025853(SAT3);Unigene0026625(PGM1);Unigene0029925(rimM);Unigene0031321(SAT3);Unigene0032188(BHLH30);Unigene0032347(ACR8)
GO:0004097	catechol oxidase activity	0.528792	Unigene0000323(co-1);Unigene0016632(co-1);Unigene0032848(co-2);Unigene0032849(PPO)
GO:0004143	diacylglycerol kinase activity	0.528792	Unigene0025793(DGK5);Unigene0027182(DGK4);Unigene0029759(DGK2);Unigene0034292(BIC1)
GO:0004360	glutamine-fructose-6-phosphate transaminase (isomerizing) activity	0.528792	Unigene0015492(KIN12D);Unigene0026781(AS);Unigene0031899(GFPT2);Unigene0035508(R1A-10)
GO:0004564	beta-fructofuranosidase activity	0.528792	Unigene0016448(INVA);Unigene0033944(GATA8);Unigene0035882(INV*DC4);Unigene0035883(INV*DC4)
GO:0005247	voltage-gated chloride channel activity	0.528792	Unigene0006411(CLC-B);Unigene0006412(CLC-A);Unigene0027598(CLC-E);Unigene0031808(CLC-C)
GO:0008808	cardiolipin synthase activity	0.528792	Unigene0002536(PLDBETA1);Unigene0015222(PLDZETA1);Unigene0026848(At1g75680);Unigene0034635(PLD1)
GO:0018738	S-formylglutathione hydrolase activity	0.528792	Unigene0002698(BDG3);Unigene0005670(CSE);Unigene0005671(CSE);Unigene0033403(CSE)
GO:0030572	phosphatidyltransferase activity	0.528792	Unigene0002536(PLDBETA1);Unigene0015222(PLDZETA1);Unigene0026848(At1g75680);Unigene0034635(PLD1)
GO:0034511	U3 snoRNA binding	0.528792	Unigene0027926(DIEXF);Unigene0029335(EMB2271);Unigene0029793(DIEXF);Unigene0029796(utp25)
GO:0042132	fructose 1,6-bisphosphate 1-phosphatase activity	0.528792	Unigene0000925(At3g55800);Unigene0015011(FBP);Unigene0024045(FBPban1);Unigene0033309(At3g55800)
GO:0051185	coenzyme transporter activity	0.528792	Unigene0026720(PXN);Unigene0026721(PXN);Unigene0026777(PHT4;4);Unigene0026778(PHT4;4)
GO:0030554	adenyl nucleotide binding	0.535952	Unigene0000008(CRK5);Unigene0000018(R1A-4);Unigene0000020(XI-F);Unigene0000023(At5g35370);Unigene0000027(ctps);Unigene0000029(At1g56140);Unigene0000030(At1g56140);Unigene0000057(R1A-10);Unigene0000074(PTI13);Unigene0000083(RPP13L3);Unigene0000085(R1B-16);Unigene0000094(R1B-19);Unigene0000100(R1B-16);Unigene0000151(LON1);Unigene0000152(RPP13L3);Unigene0000168(CNGC2);Unigene0000231(R1A-10);Unigene0…
GO:0004190	aspartic-type endopeptidase activity	0.54149	Unigene0004403(RPL15);Unigene0008770(--);Unigene0011174(--);Unigene0013064(--);Unigene0013729(AED1);Unigene0013730(APF2);Unigene0015920(At5g10080);Unigene0017011(At3g16150);Unigene0020697(CDR1);Unigene0022097(At5g10770);Unigene0022151(GIP2);Unigene0025797(AP180);Unigene0025959(PCS1);Unigene0027177(ASP1);Unigene0027583(GIP);Unigene0029938(ESK1);Unigene0030385(SPPL1);Unigene0031046(--);Unigene00311…
GO:0070001	aspartic-type peptidase activity	0.54149	Unigene0004403(RPL15);Unigene0008770(--);Unigene0011174(--);Unigene0013064(--);Unigene0013729(AED1);Unigene0013730(APF2);Unigene0015920(At5g10080);Unigene0017011(At3g16150);Unigene0020697(CDR1);Unigene0022097(At5g10770);Unigene0022151(GIP2);Unigene0025797(AP180);Unigene0025959(PCS1);Unigene0027177(ASP1);Unigene0027583(GIP);Unigene0029938(ESK1);Unigene0030385(SPPL1);Unigene0031046(--);Unigene00311…
GO:0005388	calcium-transporting ATPase activity	0.543797	Unigene0000226(HMA4);Unigene0001571(HMA5);Unigene0004478(RAN1);Unigene0004957(HMA4);Unigene0007316(ALA9);Unigene0011512(LCA1);Unigene0011514(LCA1);Unigene0012869(ACA13);Unigene0014806(ALA8);Unigene0018086(PMA4);Unigene0019113(ALA7);Unigene0023106(ECA4);Unigene0025128(PAA2);Unigene0027281(HMA4);Unigene0028066(ACA8);Unigene0034613(ALA4);Unigene0035906(PMA3)
GO:0015368	calcium:cation antiporter activity	0.56209	Unigene0003120(CAX3);Unigene0031777(NCL);Unigene0031944(MHX);Unigene0035741(CCX4);Unigene0036173(NCL)
GO:0030170	pyridoxal phosphate binding	0.56209	Unigene0001904(OsI_16936);Unigene0002261(PHS1);Unigene0002550(TYDC2);Unigene0002551(TYDC1);Unigene0005366(MGL);Unigene0005725(AG118);Unigene0008535(GAD);Unigene0009219(ACS2);Unigene0009854(TAR4);Unigene0009877(GSA);Unigene0011372(TAT);Unigene0014409(RCS3);Unigene0015282(LCB2a);Unigene0016089(BIO3-BIO1);Unigene0016767(FBL17);Unigene0017021(GAD);Unigene0018264(GGAT1);Unigene0018357(PCAS-1);Unigene0…
GO:0008712	ADP-glyceromanno-heptose 6-epimerase activity	0.56209	Unigene0000288(A1);Unigene0000365(FAR2);Unigene0001276(UXS5);Unigene0002762(3BETAHSD/D2);Unigene0004373(CCR1);Unigene0004610(AXS2);Unigene0010604(UGE2);Unigene0011991(CCR1);Unigene0014313(GAE6);Unigene0015306(GAE3);Unigene0015499(CCR1);Unigene0016008(GAE4);Unigene0025094(GAE1);Unigene0025127(UGE2);Unigene0030571(BAN);Unigene0031300(RHM1)
GO:0016903	oxidoreductase activity, acting on the aldehyde or oxo group of donors	0.56209	Unigene0000288(A1);Unigene0000365(FAR2);Unigene0000400(PHYLLO);Unigene0000496(FDH1);Unigene0001111(GAPN);Unigene0001276(UXS5);Unigene0001820(ALDH7B4);Unigene0002114(dnaJ);Unigene0002191(CAD1);Unigene0003082(PDC1);Unigene0003368(At5g09300);Unigene0004052(LACS1);Unigene0004248(AAE3);Unigene0004784(EMB3003);Unigene0006461(FAR2);Unigene0006550(4CLL1);Unigene0007956(CAD6);Unigene0013663(8HGO);Unigene0…
GO:0003922	GMP synthase (glutamine-hydrolyzing) activity	0.56209	Unigene0000027(ctps);Unigene0020326(HISN4);Unigene0023865(ASB1);Unigene0023866(XTH28);Unigene0032446(GAT1_2.1);Unigene0035558(GGP5)
GO:0008810	cellulase activity	0.56209	Unigene0001979(At1g48930);Unigene0003001(At1g64390);Unigene0004077(At4g02290);Unigene0011452(CEL1);Unigene0012925(At4g39010);Unigene0035983(CEL1)
GO:0016824	hydrolase activity, acting on acid halide bonds	0.56209	Unigene0002914(SGPP);Unigene0009032(--);Unigene0022372(CBBY);Unigene0025401(--);Unigene0026072(At4g39970);Unigene0029441(--)
GO:0016837	carbon-oxygen lyase activity, acting on polysaccharides	0.56209	Unigene0011085(AT59);Unigene0011086(At5g15110);Unigene0016000(LUS1);Unigene0024117(DDS);Unigene0027130(CASBPX2);Unigene0032862(At4g24780)
GO:0018784	(S)-2-haloacid dehalogenase activity	0.56209	Unigene0002914(SGPP);Unigene0009032(--);Unigene0022372(CBBY);Unigene0025401(--);Unigene0026072(At4g39970);Unigene0029441(--)
GO:0019120	hydrolase activity, acting on acid halide bonds, in C-halide compounds	0.56209	Unigene0002914(SGPP);Unigene0009032(--);Unigene0022372(CBBY);Unigene0025401(--);Unigene0026072(At4g39970);Unigene0029441(--)
GO:0030570	pectate lyase activity	0.56209	Unigene0011085(AT59);Unigene0011086(At5g15110);Unigene0016000(LUS1);Unigene0024117(DDS);Unigene0027130(CASBPX2);Unigene0032862(At4g24780)
GO:0016411	acylglycerol O-acyltransferase activity	0.56209	Unigene0007007(WSD1);Unigene0007008(WSD1);Unigene0025205(At1g54570);Unigene0030737(PLSC);Unigene0031265(--);Unigene0032781(WSD1);Unigene0034960(WSD1)
GO:0016851	magnesium chelatase activity	0.56209	Unigene0001406(WAV3);Unigene0005072(WAV3);Unigene0009996(CHLI);Unigene0009997(CHLI);Unigene0024249(CHLH);Unigene0032777(CHLD);Unigene0035248(--)
GO:0016684	oxidoreductase activity, acting on peroxide as acceptor	0.569141	Unigene0000804(PER27);Unigene0002326(PER51);Unigene0004018(CSA);Unigene0004138(PER17);Unigene0010646(PER12);Unigene0015770(CLEB3J9);Unigene0017209(PER46);Unigene0018471(CSA);Unigene0020507(fadD28);Unigene0021077(PER29);Unigene0022255(At1g08170);Unigene0022998(APXT);Unigene0023348(PRXIIE-1);Unigene0027556(PER9);Unigene0028400(PNC1);Unigene0028530(PER31);Unigene0028965(PER29);Unigene0029575(PER21);…
GO:0000286	alanine dehydrogenase activity	0.569141	Unigene0019102(FOLD4);Unigene0030875(HPR);Unigene0035073(10HGO)
GO:0003830	beta-1,4-mannosylglycoprotein 4-beta-N-acetylglucosaminyltransferase activity	0.569141	Unigene0025120(--);Unigene0025121(--);Unigene0036306(--)
GO:0004505	phenylalanine 4-monooxygenase activity	0.569141	Unigene0006746(ADT1);Unigene0032347(ACR8);Unigene0035888(ADT6)
GO:0004556	alpha-amylase activity	0.569141	Unigene0005837(AMY1.1);Unigene0017232(AMY2);Unigene0025752(WAXY)
GO:0015542	sugar efflux transmembrane transporter activity	0.569141	Unigene0014102(OCT7);Unigene0029477(At1g75220);Unigene0032691(STP13)
GO:0015645	fatty acid ligase activity	0.569141	Unigene0004052(LACS1);Unigene0006550(4CLL1);Unigene0033221(LACS2)
GO:0016767	geranylgeranyl-diphosphate geranylgeranyltransferase activity	0.569141	Unigene0000947(CHLG);Unigene0001231(PSY1);Unigene0018870(ABC4)
GO:0031210	phosphatidylcholine binding	0.569141	Unigene0005642(SYT3);Unigene0012008(--);Unigene0027863(SYT3)
GO:0045159	myosin II binding	0.569141	Unigene0019131(JGB);Unigene0023258(elmoA);Unigene0032677(JGB)
GO:0046556	alpha-L-arabinofuranosidase activity	0.569141	Unigene0019181(--);Unigene0029150(ASD1);Unigene0031867(BXL1)
GO:0050997	quaternary ammonium group binding	0.569141	Unigene0005642(SYT3);Unigene0012008(--);Unigene0027863(SYT3)
GO:0015095	magnesium ion transmembrane transporter activity	0.569141	Unigene0000226(HMA4);Unigene0001571(HMA5);Unigene0004478(RAN1);Unigene0004848(MRS2-I);Unigene0004957(HMA4);Unigene0007316(ALA9);Unigene0010297(MRS2-4);Unigene0011512(LCA1);Unigene0011514(LCA1);Unigene0012869(ACA13);Unigene0014806(ALA8);Unigene0018086(PMA4);Unigene0019113(ALA7);Unigene0021471(At1g25270);Unigene0024266(At2g21120);Unigene0025128(PAA2);Unigene0027281(HMA4);Unigene0028066(ACA8);Unigen…
GO:0000981	RNA polymerase II transcription factor activity, sequence-specific DNA binding	0.569141	Unigene0002722(MYB62);Unigene0004037(BHLH130);Unigene0005601(DMT1);Unigene0005602(MET2);Unigene0009885(RPP1A);Unigene0010530(MYB308);Unigene0010877(GATA9);Unigene0012184(AGL65);Unigene0015410(GT-3B);Unigene0019442(BHLH122);Unigene0025110(MYB61);Unigene0025582(MYB3R5);Unigene0026431(MYB61);Unigene0028560(MYB15);Unigene0029401(MYB94);Unigene0031128(GATA17);Unigene0031368(GATA17);Unigene0032203(At1g…
GO:0005179	hormone activity	0.569141	Unigene0006156(MIF2);Unigene0008297(RALFL19);Unigene0020387(RALFL32);Unigene0021806(LOG5);Unigene0029089(--);Unigene0029648(--);Unigene0030440(F36D4.5);Unigene0033840(TCP14);Unigene0035085(WRKY11)
GO:0008081	phosphoric diester hydrolase activity	0.569141	Unigene0000083(RPP13L3);Unigene0000856(NPC6);Unigene0001824(GDPDL3);Unigene0012830(GDPDL4);Unigene0014349(PLC4);Unigene0017232(AMY2);Unigene0023578(GDPDL6);Unigene0023751(GDPD2);Unigene0023978(RLPH2);Unigene0026039(SSL2);Unigene0030565(PLC2);Unigene0032525(ATAB2);Unigene0033016(PLC6);Unigene0033017(PLC2);Unigene0033977(NPC2);Unigene0035897(NPC3);Unigene0035956(ACPD)
GO:1901681	sulfur compound binding	0.569141	Unigene0000400(PHYLLO);Unigene0002925(GDCST);Unigene0003082(PDC1);Unigene0003320(ACBP3);Unigene0004543(--);Unigene0007788(ACBP3);Unigene0011445(TPK2);Unigene0015747(DHAR2);Unigene0016828(ACBP3);Unigene0020702(ACBP5);Unigene0028847(At1g21400);Unigene0029827(ACBP3);Unigene0030692(Os07g0190000);Unigene0031815(Os07g0190000);Unigene0031878(TKL-2);Unigene0032327(DDB_G0278111);Unigene0036509(TKT2)
GO:0016863	intramolecular oxidoreductase activity, transposing C=C bonds	0.569141	Unigene0001594(IPI2);Unigene0005350(NUDT3);Unigene0005978(GLO1);Unigene0005979(GLO2);Unigene0005980(GLO1);Unigene0009718(GLO5);Unigene0033376(At1g20050);Unigene0033908(MENB)
GO:0004396	hexokinase activity	0.569141	Unigene0005839(HXK1);Unigene0017316(At1g66430);Unigene0027194(At2g16790);Unigene0033509(HXK2)
GO:0008308	voltage-gated anion channel activity	0.569141	Unigene0006411(CLC-B);Unigene0006412(CLC-A);Unigene0027598(CLC-E);Unigene0031808(CLC-C)
GO:0015514	nitrite efflux transmembrane transporter activity	0.569141	Unigene0014102(OCT7);Unigene0022847(MSSP2);Unigene0029519(MFSD14B);Unigene0032561(NRT2.5)
GO:0051060	pullulanase activity	0.569141	Unigene0005837(AMY1.1);Unigene0014085(SBEI);Unigene0022224(PU1);Unigene0032534(SBE3)
GO:0070548	L-glutamine aminotransferase activity	0.569141	Unigene0015492(KIN12D);Unigene0026781(AS);Unigene0031899(GFPT2);Unigene0035508(R1A-10)
GO:0070696	transmembrane receptor protein serine/threonine kinase binding	0.569141	Unigene0003464(PUB28);Unigene0022935(PUB29);Unigene0026114(CSI1);Unigene0026115(CSI1)
GO:0004739	pyruvate dehydrogenase (acetyl-transferring) activity	0.569141	Unigene0003368(At5g09300);Unigene0028847(At1g21400);Unigene0030692(Os07g0190000);Unigene0031815(Os07g0190000);Unigene0031878(TKL-2);Unigene0036509(TKT2)
GO:0009016	succinyldiaminopimelate transaminase activity	0.569141	Unigene0009219(ACS2);Unigene0009853(TAR4);Unigene0009854(TAR4);Unigene0011372(TAT);Unigene0018264(GGAT1);Unigene0028034(At5g53970)
GO:0019104	DNA N-glycosylase activity	0.569141	Unigene0001245(At1g28390);Unigene0003849(HCC2);Unigene0004306(MYH);Unigene0027659(ROS1);Unigene0029528(WRKY40);Unigene0031733(tag)
GO:0000062	fatty-acyl-CoA binding	0.569141	Unigene0003320(ACBP3);Unigene0007788(ACBP3);Unigene0016828(ACBP3);Unigene0020702(ACBP5);Unigene0029827(ACBP3)
GO:0004860	protein kinase inhibitor activity	0.569141	Unigene0008520(PSAF);Unigene0020735(KRP7);Unigene0025546(KRP3);Unigene0026338(GBF);Unigene0026407(KRP5)
GO:0019210	kinase inhibitor activity	0.569141	Unigene0008520(PSAF);Unigene0020735(KRP7);Unigene0025546(KRP3);Unigene0026338(GBF);Unigene0026407(KRP5)
GO:0031418	L-ascorbic acid binding	0.569141	Unigene0002594(P4H10);Unigene0005884(ANT17);Unigene0023387(FL);Unigene0024517(ACO1);Unigene0027521(DMR6)
GO:0016620	oxidoreductase activity, acting on the aldehyde or oxo group of donors, NAD or NADP as acceptor	0.569141	Unigene0000288(A1);Unigene0000365(FAR2);Unigene0000496(FDH1);Unigene0001111(GAPN);Unigene0001276(UXS5);Unigene0001820(ALDH7B4);Unigene0002191(CAD1);Unigene0004052(LACS1);Unigene0004248(AAE3);Unigene0006461(FAR2);Unigene0006550(4CLL1);Unigene0007956(CAD6);Unigene0013663(8HGO);Unigene0015499(CCR1);Unigene0015726(At5g42250);Unigene0019128(asd);Unigene0020507(fadD28);Unigene0021227(AAE14);Unigene0022…
GO:0016830	carbon-carbon lyase activity	0.569141	Unigene0000400(PHYLLO);Unigene0000458(HEME1);Unigene0002550(TYDC2);Unigene0002551(TYDC1);Unigene0003082(PDC1);Unigene0003706(CARB);Unigene0003793(ADC1);Unigene0004196(SAMDC1);Unigene0004784(EMB3003);Unigene0005081(FBA6);Unigene0005083(FBA6);Unigene0005506(ALDP);Unigene0005509(FBA1);Unigene0005510(FBA2);Unigene0006014(LPA2);Unigene0007167(ASA1);Unigene0007304(HMGCL);Unigene0007939(PAO2);Unigene000…
GO:0000975	regulatory region DNA binding	0.569141	Unigene0000713(REV);Unigene0001005(Solyc04g005320);Unigene0002722(MYB62);Unigene0004037(BHLH130);Unigene0005305(TCP8);Unigene0006504(BLH7);Unigene0010530(MYB308);Unigene0010877(GATA9);Unigene0012184(AGL65);Unigene0014028(DEFA);Unigene0015026(ZAT9);Unigene0015873(BHLH62);Unigene0016044(ERF012);Unigene0016572(PURA1);Unigene0016574(PURA1);Unigene0016761(DOF1.5);Unigene0017147(AGL18);Unigene0019442(B…
GO:0001067	regulatory region nucleic acid binding	0.569141	Unigene0000713(REV);Unigene0001005(Solyc04g005320);Unigene0002722(MYB62);Unigene0004037(BHLH130);Unigene0005305(TCP8);Unigene0006504(BLH7);Unigene0010530(MYB308);Unigene0010877(GATA9);Unigene0012184(AGL65);Unigene0014028(DEFA);Unigene0015026(ZAT9);Unigene0015873(BHLH62);Unigene0016044(ERF012);Unigene0016572(PURA1);Unigene0016574(PURA1);Unigene0016761(DOF1.5);Unigene0017147(AGL18);Unigene0019442(B…
GO:0016831	carboxy-lyase activity	0.569141	Unigene0000400(PHYLLO);Unigene0000458(HEME1);Unigene0002550(TYDC2);Unigene0002551(TYDC1);Unigene0003082(PDC1);Unigene0003706(CARB);Unigene0003793(ADC1);Unigene0004196(SAMDC1);Unigene0004784(EMB3003);Unigene0007304(HMGCL);Unigene0007971(LYSA1);Unigene0008535(GAD);Unigene0009219(ACS2);Unigene0009391(PCK);Unigene0009421(CPK20);Unigene0009853(TAR4);Unigene0009854(TAR4);Unigene0011372(TAT);Unigene0017…
GO:0044212	transcription regulatory region DNA binding	0.569141	Unigene0000713(REV);Unigene0001005(Solyc04g005320);Unigene0002722(MYB62);Unigene0004037(BHLH130);Unigene0005305(TCP8);Unigene0006504(BLH7);Unigene0010530(MYB308);Unigene0010877(GATA9);Unigene0012184(AGL65);Unigene0014028(DEFA);Unigene0015026(ZAT9);Unigene0015873(BHLH62);Unigene0016044(ERF012);Unigene0016572(PURA1);Unigene0016574(PURA1);Unigene0016761(DOF1.5);Unigene0017147(AGL18);Unigene0019442(B…
GO:0008483	transaminase activity	0.569141	Unigene0002925(GDCST);Unigene0005725(AG118);Unigene0007167(ASA1);Unigene0009219(ACS2);Unigene0009853(TAR4);Unigene0009854(TAR4);Unigene0009877(GSA);Unigene0011372(TAT);Unigene0015492(KIN12D);Unigene0016089(BIO3-BIO1);Unigene0018264(GGAT1);Unigene0019878(NIFS1);Unigene0020279(AGT2);Unigene0023865(ASB1);Unigene0023866(XTH28);Unigene0025576(AGT1);Unigene0026037(RBK1);Unigene0026781(AS);Unigene002803…
GO:0016667	oxidoreductase activity, acting on a sulfur group of donors	0.569141	Unigene0001633(At5g39865);Unigene0003503(At2g24580);Unigene0003504(At2g24580);Unigene0005036(SOX);Unigene0005730(NIA);Unigene0005870(At5g39865);Unigene0006596(At5g16400);Unigene0007380(At1g12200);Unigene0007441(TBL5);Unigene0008666(MSRA5);Unigene0010630(pKIWI502);Unigene0010822(At5g39865);Unigene0010949(GRXC6);Unigene0010991(At3g28850);Unigene0011656(NTR1);Unigene0012170(LPD2);Unigene0012931(--);…
GO:0000009	alpha-1,6-mannosyltransferase activity	0.569141	Unigene0029796(utp25);Unigene0029928(alg2)
GO:0003937	IMP cyclohydrolase activity	0.569141	Unigene0003705(CARB);Unigene0003706(CARB)
GO:0003942	N-acetyl-gamma-glutamyl-phosphate reductase activity	0.569141	Unigene0019128(asd);Unigene0032391(PLR3)
GO:0004372	glycine hydroxymethyltransferase activity	0.569141	Unigene0025833(SHM1);Unigene0025834(SHM1)
GO:0004512	inositol-3-phosphate synthase activity	0.569141	Unigene0001811(INPS1);Unigene0009090(MIPS)
GO:0004643	phosphoribosylaminoimidazolecarboxamide formyltransferase activity	0.569141	Unigene0003705(CARB);Unigene0003706(CARB)
GO:0005242	inward rectifier potassium channel activity	0.569141	Unigene0000168(CNGC2);Unigene0033411(CNGC2)
GO:0005326	neurotransmitter transporter activity	0.569141	Unigene0005615(CHER1);Unigene0033940(BAT1)
GO:0008687	3,4-dihydroxyphenylacetate 2,3-dioxygenase activity	0.569141	Unigene0011018(At1g67280);Unigene0018002(--)
GO:0009679	hexose:proton symporter activity	0.569141	Unigene0011642(NPF5.5);Unigene0026778(PHT4;4)
GO:0015150	fucose transmembrane transporter activity	0.569141	Unigene0011642(NPF5.5);Unigene0026778(PHT4;4)
GO:0015535	fucose:proton symporter activity	0.569141	Unigene0011642(NPF5.5);Unigene0026778(PHT4;4)
GO:0016428	tRNA (cytosine-5-)-methyltransferase activity	0.569141	Unigene0011568(NOP2C);Unigene0025532(GCL1)
GO:0017046	peptide hormone binding	0.569141	Unigene0001435(IREG2);Unigene0018880(CEPR1)
GO:0017103	UTP:galactose-1-phosphate uridylyltransferase activity	0.569141	Unigene0011111(USP);Unigene0023961(ATH1)
GO:0030332	cyclin binding	0.569141	Unigene0017058(KIN10);Unigene0021457(CDKB1-2)
GO:0030971	receptor tyrosine kinase binding	0.569141	Unigene0002114(dnaJ);Unigene0023856(Zpr1)
GO:0031957	very long-chain fatty acid-CoA ligase activity	0.569141	Unigene0004052(LACS1);Unigene0033221(LACS2)
GO:0032183	SUMO binding	0.569141	Unigene0009355(UBP15);Unigene0031635(SAE2)
GO:0047259	glucomannan 4-beta-mannosyltransferase activity	0.569141	Unigene0002696(CSLA2);Unigene0011982(CSLA9)
GO:0050515	4-(cytidine 5'-diphospho)-2-C-methyl-D-erythritol kinase activity	0.569141	Unigene0030037(HSK);Unigene0032790(ISPE)
GO:0051718	DNA (cytosine-5-)-methyltransferase activity, acting on CpG substrates	0.569141	Unigene0005601(DMT1);Unigene0005602(MET2)
GO:1901567	fatty acid derivative binding	0.569141	Unigene0003320(ACBP3);Unigene0007788(ACBP3)
GO:1990782	protein tyrosine kinase binding	0.569141	Unigene0002114(dnaJ);Unigene0023856(Zpr1)
GO:0015198	oligopeptide transporter activity	0.569141	Unigene0000233(NPF8.3);Unigene0001270(OPT1);Unigene0029232(OPT5);Unigene0029233(OPT5);Unigene0029235(OPT5);Unigene0030959(OPT4);Unigene0033335(NPF8.1);Unigene0036311(OPT7)
GO:0008743	L-threonine 3-dehydrogenase activity	0.569141	Unigene0002191(CAD1);Unigene0007956(CAD6);Unigene0013663(8HGO);Unigene0015726(At5g42250);Unigene0029719(ADH1);Unigene0029720(ADH1);Unigene0031033(SDH);Unigene0033049(EMB3004);Unigene0033505(ADH1);Unigene0034267(EO);Unigene0035073(10HGO)
GO:0031071	cysteine desulfurase activity	0.569141	Unigene0005366(MGL);Unigene0008212(MCSU3);Unigene0018466(ABA3);Unigene0019878(NIFS1);Unigene0023243(--);Unigene0025112(speA);Unigene0025576(AGT1);Unigene0025833(SHM1);Unigene0025834(SHM1);Unigene0026308(--);Unigene0036443(SUFE2)
GO:0070008	serine-type exopeptidase activity	0.569141	Unigene0000091(SCPL19);Unigene0001093(SCPL50);Unigene0005689(SCPL45);Unigene0023617(SCPL34);Unigene0030258(SCPL42);Unigene0030948(SCPL40);Unigene0030994(SCPL29);Unigene0031437(SCPL18);Unigene0032602(DEGP2);Unigene0034999(SCPL18);Unigene0035833(SCPL45);Unigene0036399(SCPL18);Unigene0036497(SCP26)
GO:0016884	carbon-nitrogen ligase activity, with glutamine as amido-N-donor	0.569141	Unigene0000027(ctps);Unigene0002407(TSJT1);Unigene0003705(CARB);Unigene0003706(CARB);Unigene0020326(HISN4);Unigene0022349(GRXC13);Unigene0023865(ASB1);Unigene0023866(XTH28);Unigene0024866(TSJT1);Unigene0024868(TSJT1);Unigene0026781(AS);Unigene0026782(ASN3);Unigene0028309(POPTRDRAFT_831870);Unigene0029644(HIPP39);Unigene0031092(DIR11);Unigene0031899(GFPT2);Unigene0032446(GAT1_2.1);Unigene0033017(P…
GO:0016002	sulfite reductase activity	0.569141	Unigene0005730(NIA);Unigene0010630(pKIWI502);Unigene0014338(FRO2);Unigene0023783(Os07g0147900);Unigene0029443(FRO2);Unigene0033207(PETH);Unigene0033208(PETH)
GO:0016641	oxidoreductase activity, acting on the CH-NH2 group of donors, oxygen as acceptor	0.569141	Unigene0018542(AO1);Unigene0018543(At1g62810);Unigene0021650(BHLH62);Unigene0024517(ACO1);Unigene0024887(yhiN);Unigene0025671(THI1);Unigene0025672(THI1-2);Unigene0033638(SQE1);Unigene0033639(SQE1);Unigene0034852(SQE1)
GO:0005509	calcium ion binding	0.569141	Unigene0000562(CML41);Unigene0000633(WAK2);Unigene0000635(WAK2);Unigene0001190(--);Unigene0001340(CP1);Unigene0001644(PSBQ2);Unigene0001904(OsI_16936);Unigene0001988(CML18);Unigene0003160(CML5);Unigene0003897(CML25);Unigene0004242(PPD2);Unigene0005016(CAL1);Unigene0005642(SYT3);Unigene0005720(NCL2);Unigene0005802(ANN4);Unigene0005837(AMY1.1);Unigene0006581(At2g32450);Unigene0007124(LIP);Unigene00…
GO:0008967	phosphoglycolate phosphatase activity	0.569141	Unigene0001571(HMA5);Unigene0002914(SGPP);Unigene0004478(RAN1);Unigene0004957(HMA4);Unigene0007316(ALA9);Unigene0009032(--);Unigene0011512(LCA1);Unigene0014321(GPP2);Unigene0018086(PMA4);Unigene0022372(CBBY);Unigene0025401(--);Unigene0025436(TPS6);Unigene0026072(At4g39970);Unigene0028066(ACA8);Unigene0028438(At2g40480);Unigene0029441(--);Unigene0030875(HPR);Unigene0035906(PMA3)
GO:0001716	L-amino-acid oxidase activity	0.569141	Unigene0024887(yhiN);Unigene0025671(THI1);Unigene0025672(THI1-2);Unigene0033638(SQE1);Unigene0033639(SQE1);Unigene0034852(SQE1)
GO:0008734	L-aspartate oxidase activity	0.569141	Unigene0024887(yhiN);Unigene0025671(THI1);Unigene0025672(THI1-2);Unigene0033638(SQE1);Unigene0033639(SQE1);Unigene0034852(SQE1)
GO:0015922	aspartate oxidase activity	0.569141	Unigene0024887(yhiN);Unigene0025671(THI1);Unigene0025672(THI1-2);Unigene0033638(SQE1);Unigene0033639(SQE1);Unigene0034852(SQE1)
GO:0016769	transferase activity, transferring nitrogenous groups	0.569141	Unigene0002925(GDCST);Unigene0005725(AG118);Unigene0007167(ASA1);Unigene0009219(ACS2);Unigene0009853(TAR4);Unigene0009854(TAR4);Unigene0009877(GSA);Unigene0011372(TAT);Unigene0015492(KIN12D);Unigene0016089(BIO3-BIO1);Unigene0018264(GGAT1);Unigene0019878(NIFS1);Unigene0020279(AGT2);Unigene0023865(ASB1);Unigene0023866(XTH28);Unigene0025576(AGT1);Unigene0026037(RBK1);Unigene0026781(AS);Unigene002803…
GO:0036094	small molecule binding	0.569141	Unigene0000008(CRK5);Unigene0000015(TUBB1);Unigene0000018(R1A-4);Unigene0000020(XI-F);Unigene0000023(At5g35370);Unigene0000027(ctps);Unigene0000029(At1g56140);Unigene0000030(At1g56140);Unigene0000057(R1A-10);Unigene0000074(PTI13);Unigene0000077(ARAC11);Unigene0000083(RPP13L3);Unigene0000085(R1B-16);Unigene0000094(R1B-19);Unigene0000100(R1B-16);Unigene0000151(LON1);Unigene0000152(RPP13L3);Unigene0…
GO:0000225	N-acetylglucosaminylphosphatidylinositol deacetylase activity	0.569141	Unigene0035660(pigl)
GO:0000246	delta24(24-1) sterol reductase activity	0.569141	Unigene0001772(DIM)
GO:0000247	C-8 sterol isomerase activity	0.569141	Unigene0033376(At1g20050)
GO:0000334	3-hydroxyanthranilate 3,4-dioxygenase activity	0.569141	Unigene0000759(RAM2)
GO:0000406	double-strand/single-strand DNA junction binding	0.569141	Unigene0029061(MSH2)
GO:0000700	mismatch base pair DNA N-glycosylase activity	0.569141	Unigene0004306(MYH)
GO:0000701	purine-specific mismatch base pair DNA N-glycosylase activity	0.569141	Unigene0004306(MYH)
GO:0000906	6,7-dimethyl-8-ribityllumazine synthase activity	0.569141	Unigene0025602(At2g44050)
GO:0001735	prenylcysteine oxidase activity	0.569141	Unigene0032081(FLCY)
GO:0003832	beta-alanyl-dopamine hydrolase activity	0.569141	Unigene0016644(--)
GO:0003939	L-iditol 2-dehydrogenase activity	0.569141	Unigene0031033(SDH)
GO:0004030	aldehyde dehydrogenase [NAD(P)+] activity	0.569141	Unigene0025643(ALDH2C4)
GO:0004037	allantoicase activity	0.569141	Unigene0032700(At5g23350)
GO:0004081	bis(5'-nucleosyl)-tetraphosphatase (asymmetrical) activity	0.569141	Unigene0002281(NUDT25)
GO:0004141	dethiobiotin synthase activity	0.569141	Unigene0016089(BIO3-BIO1)
GO:0004160	dihydroxy-acid dehydratase activity	0.569141	Unigene0001524(DHAD)
GO:0004328	formamidase activity	0.569141	Unigene0032752(fmdA)
GO:0004456	phosphogluconate dehydratase activity	0.569141	Unigene0001524(DHAD)
GO:0004474	malate synthase activity	0.569141	Unigene0013235(MLS)
GO:0004555	alpha,alpha-trehalase activity	0.569141	Unigene0024910(TRE1)
GO:0004607	phosphatidylcholine-sterol O-acyltransferase activity	0.569141	Unigene0008882(PSAT)
GO:0004679	AMP-activated protein kinase activity	0.569141	Unigene0017058(KIN10)
GO:0004703	G-protein coupled receptor kinase activity	0.569141	Unigene0017058(KIN10)
GO:0004706	JUN kinase kinase kinase activity	0.569141	Unigene0019977(--)
GO:0004723	calcium-dependent protein serine/threonine phosphatase activity	0.569141	Unigene0016464(CBL7)
GO:0004753	saccharopine dehydrogenase activity	0.569141	Unigene0027073(LKR/SDH)
GO:0004767	sphingomyelin phosphodiesterase activity	0.569141	Unigene0035956(ACPD)
GO:0004769	steroid delta-isomerase activity	0.569141	Unigene0033376(At1g20050)
GO:0004833	tryptophan 2,3-dioxygenase activity	0.569141	Unigene0004102(HSPRO2)
GO:0004848	ureidoglycolate hydrolase activity	0.569141	Unigene0016467(UAH)
GO:0005212	structural constituent of eye lens	0.569141	Unigene0019998(--)
GO:0005248	voltage-gated sodium channel activity	0.569141	Unigene0029244(TIC100)
GO:0005272	sodium channel activity	0.569141	Unigene0029244(TIC100)
GO:0008107	galactoside 2-alpha-L-fucosyltransferase activity	0.569141	Unigene0022977(FT1)
GO:0008675	2-dehydro-3-deoxy-phosphogluconate aldolase activity	0.569141	Unigene0025153(--)
GO:0008700	4-hydroxy-2-oxoglutarate aldolase activity	0.569141	Unigene0025153(--)
GO:0008747	N-acetylneuraminate lyase activity	0.569141	Unigene0029608(DHPS1)
GO:0008818	cobalamin 5'-phosphate synthase activity	0.569141	Unigene0035272(--)
GO:0008898	S-adenosylmethionine-homocysteine S-methyltransferase activity	0.569141	Unigene0011804(HMT-1)
GO:0008929	methylglyoxal synthase activity	0.569141	Unigene0032408(RING1)
GO:0008965	phosphoenolpyruvate-protein phosphotransferase activity	0.569141	Unigene0027487(PPD)
GO:0008989	rRNA (guanine-N1-)-methyltransferase activity	0.569141	Unigene0004700(mrm1)
GO:0009670	triose-phosphate:phosphate antiporter activity	0.569141	Unigene0000659(PPT2)
GO:0009671	nitrate:proton symporter activity	0.569141	Unigene0006412(CLC-A)
GO:0009673	low-affinity phosphate transmembrane transporter activity	0.569141	Unigene0030459(PHT2-1)
GO:0009703	nitrate reductase (NADH) activity	0.569141	Unigene0005730(NIA)
GO:0009974	zeinoxanthin epsilon hydroxylase activity	0.569141	Unigene0032410(CYP97C1)
GO:0010283	pinoresinol reductase activity	0.569141	Unigene0032391(PLR3)
GO:0010291	carotene beta-ring hydroxylase activity	0.569141	Unigene0031185(CYP97A3)
GO:0010296	prenylcysteine methylesterase activity	0.569141	Unigene0018274(ICME)
GO:0010303	limit dextrinase activity	0.569141	Unigene0022224(PU1)
GO:0010487	thermospermine synthase activity	0.569141	Unigene0032861(ACL5)
GO:0015109	chromate transmembrane transporter activity	0.569141	Unigene0035656(--)
GO:0015121	phosphoenolpyruvate:phosphate antiporter activity	0.569141	Unigene0000659(PPT2)
GO:0015180	L-alanine transmembrane transporter activity	0.569141	Unigene0033940(BAT1)
GO:0015199	amino-acid betaine transmembrane transporter activity	0.569141	Unigene0009423(OCT1)
GO:0015226	carnitine transmembrane transporter activity	0.569141	Unigene0009423(OCT1)
GO:0015231	5-formyltetrahydrofolate transporter activity	0.569141	Unigene0026287(At2g32040)
GO:0015350	methotrexate transporter activity	0.569141	Unigene0026287(At2g32040)
GO:0015355	secondary active monocarboxylate transmembrane transporter activity	0.569141	Unigene0000659(PPT2)
GO:0015513	nitrite uptake transmembrane transporter activity	0.569141	Unigene0006412(CLC-A)
GO:0016174	NAD(P)H oxidase activity	0.569141	Unigene0030316(RBOHF)
GO:0016594	glycine binding	0.569141	Unigene0001904(OsI_16936)
GO:0016711	flavonoid 3'-monooxygenase activity	0.569141	Unigene0011453(CYP75B2)
GO:0016768	spermine synthase activity	0.569141	Unigene0032861(ACL5)
GO:0016867	intramolecular transferase activity, transferring acyl groups	0.569141	Unigene0025602(At2g44050)
GO:0016971	flavin-linked sulfhydryl oxidase activity	0.569141	Unigene0027070(QSOX1)
GO:0016996	endo-alpha-(2,8)-sialidase activity	0.569141	Unigene0029699(HSFB1)
GO:0016997	alpha-sialidase activity	0.569141	Unigene0029699(HSFB1)
GO:0017089	glycolipid transporter activity	0.569141	Unigene0036243(GLTP3)
GO:0018114	threonine racemase activity	0.569141	Unigene0001904(OsI_16936)
GO:0018759	methenyltetrahydromethanopterin cyclohydrolase activity	0.569141	Unigene0024468(AK2)
GO:0019948	SUMO activating enzyme activity	0.569141	Unigene0031635(SAE2)
GO:0030378	serine racemase activity	0.569141	Unigene0001904(OsI_16936)
GO:0030410	nicotianamine synthase activity	0.569141	Unigene0001656(CHLN)
GO:0030629	U6 snRNA 3'-end binding	0.569141	Unigene0032610(mettl16)
GO:0030899	calcium-dependent ATPase activity	0.569141	Unigene0012786(MIND1)
GO:0031127	alpha-(1,2)-fucosyltransferase activity	0.569141	Unigene0022977(FT1)
GO:0031402	sodium ion binding	0.569141	Unigene0021737(--)
GO:0031434	mitogen-activated protein kinase kinase binding	0.569141	Unigene0019977(--)
GO:0031704	apelin receptor binding	0.569141	Unigene0033840(TCP14)
GO:0031964	beta-alanyl-histamine hydrolase activity	0.569141	Unigene0016644(--)
GO:0032441	pheophorbide a oxygenase activity	0.569141	Unigene0031734(PAO)
GO:0033134	ubiquitin activating enzyme binding	0.569141	Unigene0031635(SAE2)
GO:0033729	anthocyanidin reductase activity	0.569141	Unigene0022643(SNL6)
GO:0033836	flavonol 7-O-beta-glucosyltransferase activity	0.569141	Unigene0036099(UGT89B2)
GO:0033840	NDP-glucose-starch glucosyltransferase activity	0.569141	Unigene0025752(WAXY)
GO:0034039	8-oxo-7,8-dihydroguanine DNA N-glycosylase activity	0.569141	Unigene0004306(MYH)
GO:0034256	chlorophyll(ide) b reductase activity	0.569141	Unigene0028781(NYC1)
GO:0035485	adenine/guanine mispair binding	0.569141	Unigene0004306(MYH)
GO:0035597	N6-isopentenyladenosine methylthiotransferase activity	0.569141	Unigene0016899(At4g36390)
GO:0036041	long-chain fatty acid binding	0.569141	Unigene0033654(RIDA)
GO:0042282	hydroxymethylglutaryl-CoA reductase activity	0.569141	Unigene0026465(HMGR2)
GO:0042409	caffeoyl-CoA O-methyltransferase activity	0.569141	Unigene0031223(At4g26220)
GO:0042605	peptide antigen binding	0.569141	Unigene0001772(DIM)
GO:0042903	tubulin deacetylase activity	0.569141	Unigene0024872(HDA14)
GO:0043765	T/G mismatch-specific endonuclease activity	0.569141	Unigene0033673(ENDO1)
GO:0043817	phosphosulfolactate synthase activity	0.569141	Unigene0021538(HSA32)
GO:0043822	ribonuclease M5 activity	0.569141	Unigene0031782(GYRB)
GO:0043879	glycolate transmembrane transporter activity	0.569141	Unigene0034827(PLGG1)
GO:0044388	small protein activating enzyme binding	0.569141	Unigene0031635(SAE2)
GO:0045435	lycopene epsilon cyclase activity	0.569141	Unigene0026030(CRTL-E-1)
GO:0045502	dynein binding	0.569141	Unigene0022206(JGB)
GO:0045504	dynein heavy chain binding	0.569141	Unigene0022206(JGB)
GO:0046316	gluconokinase activity	0.569141	Unigene0027194(At2g16790)
GO:0046353	aminoglycoside 3-N-acetyltransferase activity	0.569141	Unigene0029529(XBAT31)
GO:0046409	p-coumarate 3-hydroxylase activity	0.569141	Unigene0002108(CYP98A2)
GO:0046577	long-chain-alcohol oxidase activity	0.569141	Unigene0026767(FAO1)
GO:0046993	oxidoreductase activity, acting on X-H and Y-H to form an X-Y bond, with oxygen as acceptor	0.569141	Unigene0023645(BBE1)
GO:0047130	saccharopine dehydrogenase (NADP+, L-lysine-forming) activity	0.569141	Unigene0027073(LKR/SDH)
GO:0047131	saccharopine dehydrogenase (NAD+, L-glutamate-forming) activity	0.569141	Unigene0027073(LKR/SDH)
GO:0047196	long-chain-alcohol O-fatty-acyltransferase activity	0.569141	Unigene0022321(ASAT1)
GO:0047213	anthocyanidin 3-O-glucosyltransferase activity	0.569141	Unigene0024236(GT5)
GO:0047216	inositol 3-alpha-galactosyltransferase activity	0.569141	Unigene0036296(GOLS2)
GO:0047268	galactinol-raffinose galactosyltransferase activity	0.569141	Unigene0006322(STS1)
GO:0047274	galactinol-sucrose galactosyltransferase activity	0.569141	Unigene0006322(STS1)
GO:0047453	ATP-dependent NAD(P)H-hydrate dehydratase activity	0.569141	Unigene0002323(VIT_05s0020g02800)
GO:0047657	alpha-1,3-glucan synthase activity	0.569141	Unigene0025752(WAXY)
GO:0047663	aminoglycoside 6'-N-acetyltransferase activity	0.569141	Unigene0031567(p20)
GO:0047668	amygdalin beta-glucosidase activity	0.569141	Unigene0022336(BGLU44)
GO:0047714	galactolipase activity	0.569141	Unigene0024859(At4g16820)
GO:0047750	cholestenol delta-isomerase activity	0.569141	Unigene0033376(At1g20050)
GO:0047869	dimethylpropiothetin dethiomethylase activity	0.569141	Unigene0018109(T85)
GO:0047893	flavonol 3-O-glucosyltransferase activity	0.569141	Unigene0036099(UGT89B2)
GO:0047912	galacturonokinase activity	0.569141	Unigene0030443(GALAK)
GO:0050017	L-3-cyanoalanine synthase activity	0.569141	Unigene0018357(PCAS-1)
GO:0050053	levansucrase activity	0.569141	Unigene0034656(PSAE)
GO:0050242	pyruvate, phosphate dikinase activity	0.569141	Unigene0027487(PPD)
GO:0050269	coniferyl-aldehyde dehydrogenase activity	0.569141	Unigene0025643(ALDH2C4)
GO:0050464	nitrate reductase (NADPH) activity	0.569141	Unigene0005730(NIA)
GO:0050468	reticuline oxidase activity	0.569141	Unigene0023645(BBE1)
GO:0050538	N-carbamoyl-L-amino-acid hydrolase activity	0.569141	Unigene0016467(UAH)
GO:0050589	leucocyanidin oxygenase activity	0.569141	Unigene0005884(ANT17)
GO:0050626	trimethylamine-N-oxide reductase (cytochrome c) activity	0.569141	Unigene0028520(At2g14510)
GO:0050833	pyruvate transmembrane transporter activity	0.569141	Unigene0002879(BASS2)
GO:0052615	ent-kaurene oxidase activity	0.569141	Unigene0019984(KO)
GO:0052616	ent-kaur-16-en-19-ol oxidase activity	0.569141	Unigene0019984(KO)
GO:0052617	ent-kaur-16-en-19-al oxidase activity	0.569141	Unigene0019984(KO)
GO:0052793	pectin acetylesterase activity	0.569141	Unigene0003087(PAE9)
GO:0052856	NADHX epimerase activity	0.569141	Unigene0002323(VIT_05s0020g02800)
GO:0052857	NADPHX epimerase activity	0.569141	Unigene0002323(VIT_05s0020g02800)
GO:0052907	23S rRNA (adenine(1618)-N(6))-methyltransferase activity	0.569141	Unigene0032610(mettl16)
GO:0061598	molybdopterin adenylyltransferase activity	0.569141	Unigene0030942(CNX1)
GO:0061599	molybdopterin molybdotransferase activity	0.569141	Unigene0030942(CNX1)
GO:0061656	SUMO conjugating enzyme activity	0.569141	Unigene0031635(SAE2)
GO:0070273	phosphatidylinositol-4-phosphate binding	0.569141	Unigene0036243(GLTP3)
GO:0070463	tubulin-dependent ATPase activity	0.569141	Unigene0028582(KIN8B)
GO:0071855	neuropeptide receptor binding	0.569141	Unigene0033840(TCP14)
GO:0072374	carotene epsilon hydroxylase activity	0.569141	Unigene0032410(CYP97C1)
GO:0080045	quercetin 3'-O-glucosyltransferase activity	0.569141	Unigene0010472(UGT88B1)
GO:0080081	4-methylumbelliferyl-beta-D-glucopyranoside beta-glucosidase activity	0.569141	Unigene0022336(BGLU44)
GO:0080082	esculin beta-glucosidase activity	0.569141	Unigene0022336(BGLU44)
GO:0080083	beta-gentiobiose beta-glucosidase activity	0.569141	Unigene0022336(BGLU44)
GO:0080095	phosphatidylethanolamine-sterol O-acyltransferase activity	0.569141	Unigene0008882(PSAT)
GO:0080096	phosphatidate-sterol O-acyltransferase activity	0.569141	Unigene0008882(PSAT)
GO:0080116	glucuronoxylan glucuronosyltransferase activity	0.569141	Unigene0012589(GUX2)
GO:0089721	phosphoenolpyruvate transmembrane transporter activity	0.569141	Unigene0000659(PPT2)
GO:0090486	small RNA 2'-O-methyltransferase	0.569141	Unigene0019007(HEN1)
GO:0097689	iron channel activity	0.569141	Unigene0001435(IREG2)
GO:1901974	glycerate transmembrane transporter activity	0.569141	Unigene0034827(PLGG1)
GO:1902444	riboflavin binding	0.569141	Unigene0025602(At2g44050)
GO:1904012	platinum binding	0.569141	Unigene0033654(RIDA)
GO:1904013	xenon atom binding	0.569141	Unigene0033654(RIDA)
GO:1990538	xylan O-acetyltransferase activity	0.569141	Unigene0031960(TBL35)
GO:0016780	phosphotransferase activity, for other substituted phosphate groups	0.569141	Unigene0002536(PLDBETA1);Unigene0006172(Os03g0283600);Unigene0011905(AASDHPPT);Unigene0015222(PLDZETA1);Unigene0018057(AAPT1);Unigene0023593(--);Unigene0026848(At1g75680);Unigene0034635(PLD1);Unigene0035272(--)
GO:0003886	DNA (cytosine-5-)-methyltransferase activity	0.569141	Unigene0004932(MET1B);Unigene0005601(DMT1);Unigene0005602(MET2);Unigene0016167(CMT3);Unigene0029733(CMT2)
GO:0004096	catalase activity	0.569141	Unigene0015770(CLEB3J9);Unigene0020507(fadD28);Unigene0021077(PER29);Unigene0022255(At1g08170);Unigene0022998(APXT)
GO:0008801	beta-phosphoglucomutase activity	0.569141	Unigene0002914(SGPP);Unigene0014321(GPP2);Unigene0022372(CBBY);Unigene0026072(At4g39970);Unigene0028438(At2g40480)
GO:0016827	hydrolase activity, acting on acid carbon-phosphorus bonds	0.569141	Unigene0002914(SGPP);Unigene0014321(GPP2);Unigene0022372(CBBY);Unigene0026072(At4g39970);Unigene0028438(At2g40480)
GO:0004337	geranyltranstransferase activity	0.569141	Unigene0000947(CHLG);Unigene0001231(PSY1);Unigene0018870(ABC4)
GO:0004709	MAP kinase kinase kinase activity	0.569141	Unigene0019977(--);Unigene0028692(MAP3K12);Unigene0030557(YDA)
GO:0005542	folic acid binding	0.569141	Unigene0002049(At4g12130);Unigene0019557(At4g12130);Unigene0031390(THY-1)
GO:0008508	bile acid:sodium symporter activity	0.569141	Unigene0000533(BASS1);Unigene0002879(BASS2);Unigene0021761(BASS1)
GO:0008838	diaminopropionate ammonia-lyase activity	0.569141	Unigene0001904(OsI_16936);Unigene0014409(RCS3);Unigene0018357(PCAS-1)
GO:0015125	bile acid transmembrane transporter activity	0.569141	Unigene0000533(BASS1);Unigene0002879(BASS2);Unigene0021761(BASS1)
GO:0015154	disaccharide transmembrane transporter activity	0.569141	Unigene0001541(SUC1);Unigene0021633(SUC4);Unigene0024541(SUC2)
GO:0015157	oligosaccharide transmembrane transporter activity	0.569141	Unigene0001541(SUC1);Unigene0021633(SUC4);Unigene0024541(SUC2)
GO:0017150	tRNA dihydrouridine synthase activity	0.569141	Unigene0018593(PDX1);Unigene0018906(At4g38890);Unigene0034336(PDX1)
GO:0050511	undecaprenyldiphospho-muramoylpentapeptide beta-N-acetylglucosaminyltransferase activity	0.569141	Unigene0010472(UGT88B1);Unigene0010474(RhGT1);Unigene0015381(UGT86A1)
GO:0005315	inorganic phosphate transmembrane transporter activity	0.569141	Unigene0021655(At3g43660);Unigene0026777(PHT4;4);Unigene0026778(PHT4;4);Unigene0030459(PHT2-1)
GO:0015020	glucuronosyltransferase activity	0.569141	Unigene0008842(UGT80B1);Unigene0012589(GUX2);Unigene0034060(GUX3);Unigene0036245(IRX9H)
GO:0016843	amine-lyase activity	0.569141	Unigene0018593(PDX1);Unigene0026039(SSL2);Unigene0034058(SSL3);Unigene0034336(PDX1)
GO:0019143	3-deoxy-manno-octulosonate-8-phosphatase activity	0.569141	Unigene0004957(HMA4);Unigene0018086(PMA4);Unigene0025128(PAA2);Unigene0035906(PMA3)
GO:0030545	receptor regulator activity	0.569141	Unigene0008297(RALFL19);Unigene0020387(RALFL32);Unigene0031458(PSK6);Unigene0035510(PSK6)
GO:0031409	pigment binding	0.569141	Unigene0023108(LHCA1);Unigene0028076(CAB13);Unigene0034817(LHCB5);Unigene0035463(CAP10A)
GO:0033094	butane-1,4-diamine:2-oxoglutarate aminotransferase activity	0.569141	Unigene0005725(AG118);Unigene0009877(GSA);Unigene0016089(BIO3-BIO1);Unigene0020279(AGT2)
GO:0042286	glutamate-1-semialdehyde 2,1-aminomutase activity	0.569141	Unigene0005725(AG118);Unigene0009877(GSA);Unigene0016089(BIO3-BIO1);Unigene0020279(AGT2)
GO:0045303	diaminobutyrate-2-oxoglutarate transaminase activity	0.569141	Unigene0005725(AG118);Unigene0009877(GSA);Unigene0016089(BIO3-BIO1);Unigene0020279(AGT2)
GO:0004008	copper-exporting ATPase activity	0.570197	Unigene0000226(HMA4);Unigene0001571(HMA5);Unigene0004478(RAN1);Unigene0004957(HMA4);Unigene0007316(ALA9);Unigene0011512(LCA1);Unigene0012869(ACA13);Unigene0014806(ALA8);Unigene0018086(PMA4);Unigene0019113(ALA7);Unigene0025128(PAA2);Unigene0027281(HMA4);Unigene0028066(ACA8);Unigene0034613(ALA4);Unigene0035906(PMA3)
GO:0015434	cadmium-transporting ATPase activity	0.570197	Unigene0000226(HMA4);Unigene0001571(HMA5);Unigene0004478(RAN1);Unigene0004957(HMA4);Unigene0007316(ALA9);Unigene0011512(LCA1);Unigene0012869(ACA13);Unigene0014806(ALA8);Unigene0018086(PMA4);Unigene0019113(ALA7);Unigene0025128(PAA2);Unigene0027281(HMA4);Unigene0028066(ACA8);Unigene0034613(ALA4);Unigene0035906(PMA3)
GO:0043682	copper-transporting ATPase activity	0.570197	Unigene0000226(HMA4);Unigene0001571(HMA5);Unigene0004478(RAN1);Unigene0004957(HMA4);Unigene0007316(ALA9);Unigene0011512(LCA1);Unigene0012869(ACA13);Unigene0014806(ALA8);Unigene0018086(PMA4);Unigene0019113(ALA7);Unigene0025128(PAA2);Unigene0027281(HMA4);Unigene0028066(ACA8);Unigene0034613(ALA4);Unigene0035906(PMA3)
GO:0016799	hydrolase activity, hydrolyzing N-glycosyl compounds	0.578203	Unigene0001245(At1g28390);Unigene0003849(HCC2);Unigene0004306(MYH);Unigene0024471(MTN2);Unigene0027659(ROS1);Unigene0027780(RPS18);Unigene0029528(WRKY40);Unigene0031733(tag)
GO:0004842	ubiquitin-protein transferase activity	0.582008	Unigene0000901(Os04g0590900);Unigene0001406(WAV3);Unigene0001532(SIS3);Unigene0002072(ATL6);Unigene0002690(ATL46);Unigene0003091(WAVH1);Unigene0003464(PUB28);Unigene0003808(PUB8);Unigene0004134(ATL60);Unigene0004534(NIP2);Unigene0004772(FBX6);Unigene0005072(WAV3);Unigene0006281(PUB30);Unigene0006689(SGR9);Unigene0006933(PUB23);Unigene0008031(ATL65);Unigene0008553(ORTH2);Unigene0008615(RHA4A);Unig…
GO:0016639	oxidoreductase activity, acting on the CH-NH2 group of donors, NAD or NADP as acceptor	0.58501	Unigene0000366(CHLP);Unigene0000625(ZDS);Unigene0007380(At1g12200);Unigene0007939(PAO2);Unigene0011656(NTR1);Unigene0020507(fadD28);Unigene0022926(CHLP);Unigene0025671(THI1);Unigene0025672(THI1-2);Unigene0025689(ufaA1);Unigene0026030(CRTL-E-1);Unigene0027879(CRTISO);Unigene0029400(--);Unigene0031029(YUC4);Unigene0033638(SQE1);Unigene0033639(SQE1);Unigene0034852(SQE1);Unigene0036067(YUC3)
GO:0019901	protein kinase binding	0.58501	Unigene0000074(PTI13);Unigene0002106(BZIP34);Unigene0002114(dnaJ);Unigene0005163(NAC048);Unigene0006582(TOL6);Unigene0016473(WNK5);Unigene0016712(CYCU4-1);Unigene0016899(At4g36390);Unigene0017460(PNSL5);Unigene0019567(AHP4);Unigene0019977(--);Unigene0023035(UNC);Unigene0023856(Zpr1);Unigene0031731(AHK3);Unigene0033963(AHK4);Unigene0033966(AHK4);Unigene0035135(OXI1);Unigene0035269(AHK2)
GO:0004536	deoxyribonuclease activity	0.589664	Unigene0000283(ABCG18);Unigene0000445(ABCG11);Unigene0000682(RECQL1);Unigene0000767(--);Unigene0000781(ABCG32);Unigene0000849(ABCB4);Unigene0000962(EIF4A1);Unigene0002424(APRR5);Unigene0002507(At3g47830);Unigene0004306(MYH);Unigene0005148(ABCG15);Unigene0006575(ABCG11);Unigene0007936(ABCG11);Unigene0008246(ABCG36);Unigene0008248(PDR1);Unigene0008535(GAD);Unigene0010524(FANCM);Unigene0014934(ABCC4…
GO:0004148	dihydrolipoyl dehydrogenase activity	0.589664	Unigene0003503(At2g24580);Unigene0003504(At2g24580);Unigene0007380(At1g12200);Unigene0011656(NTR1);Unigene0012170(LPD2);Unigene0022926(CHLP);Unigene0024887(yhiN);Unigene0025671(THI1);Unigene0025672(THI1-2);Unigene0025689(ufaA1);Unigene0026030(CRTL-E-1);Unigene0026767(FAO1);Unigene0027879(CRTISO);Unigene0029400(--);Unigene0033638(SQE1);Unigene0036067(YUC3)
GO:0051903	S-(hydroxymethyl)glutathione dehydrogenase activity	0.589664	Unigene0002191(CAD1);Unigene0007956(CAD6);Unigene0013663(8HGO);Unigene0015726(At5g42250);Unigene0029719(ADH1);Unigene0029720(ADH1);Unigene0031033(SDH);Unigene0033505(ADH1);Unigene0034267(EO);Unigene0035073(10HGO)
GO:0016833	oxo-acid-lyase activity	0.593954	Unigene0007167(ASA1);Unigene0007304(HMGCL);Unigene0013235(MLS);Unigene0015656(HISN3);Unigene0020326(HISN4);Unigene0023865(ASB1);Unigene0023866(XTH28);Unigene0025153(--);Unigene0028373(ASA1);Unigene0029608(DHPS1);Unigene0030553(BCAT2);Unigene0033908(MENB)
GO:0003938	IMP dehydrogenase activity	0.596374	Unigene0005978(GLO1);Unigene0005979(GLO2);Unigene0005980(GLO1);Unigene0007210(CBSX6);Unigene0009718(GLO5);Unigene0025852(yrpB);Unigene0027598(CLC-E)
GO:0003977	UDP-N-acetylglucosamine diphosphorylase activity	0.596374	Unigene0005762(CRK26);Unigene0018646(SAT3);Unigene0020015(SAT1);Unigene0021418(ADG2);Unigene0025853(SAT3);Unigene0029925(rimM);Unigene0031321(SAT3)
GO:0004020	adenylylsulfate kinase activity	0.596374	Unigene0000849(ABCB4);Unigene0001883(R1B-14);Unigene0017133(AKN);Unigene0028411(CER3);Unigene0029113(ABCB15);Unigene0030345(FFC);Unigene0033603(ABCG25)
GO:0008773	[protein-PII] uridylyltransferase activity	0.596374	Unigene0012178(OsI_027381);Unigene0012327(STY46);Unigene0014082(ACR1);Unigene0017713(SCRM);Unigene0025523(BHLH93);Unigene0032188(BHLH30);Unigene0032347(ACR8)
GO:0051002	ligase activity, forming nitrogen-metal bonds	0.596374	Unigene0001406(WAV3);Unigene0005072(WAV3);Unigene0009996(CHLI);Unigene0009997(CHLI);Unigene0024249(CHLH);Unigene0032777(CHLD);Unigene0035248(--)
GO:0051003	ligase activity, forming nitrogen-metal bonds, forming coordination complexes	0.596374	Unigene0001406(WAV3);Unigene0005072(WAV3);Unigene0009996(CHLI);Unigene0009997(CHLI);Unigene0024249(CHLH);Unigene0032777(CHLD);Unigene0035248(--)
GO:0003727	single-stranded RNA binding	0.612238	Unigene0001987(CSP41A);Unigene0004411(CLF);Unigene0010252(EMB2453);Unigene0017014(MTERF5);Unigene0025806(RBP47C);Unigene0025833(SHM1);Unigene0025834(SHM1);Unigene0026243(At5g63670);Unigene0029002(APUM5);Unigene0029837(HCF107);Unigene0030875(HPR);Unigene0033060(MTERF8);Unigene0033207(PETH);Unigene0033208(PETH);Unigene0033753(EZA1)
GO:0015086	cadmium ion transmembrane transporter activity	0.612238	Unigene0000226(HMA4);Unigene0001571(HMA5);Unigene0004478(RAN1);Unigene0004957(HMA4);Unigene0007316(ALA9);Unigene0011512(LCA1);Unigene0012869(ACA13);Unigene0014806(ALA8);Unigene0018086(PMA4);Unigene0019113(ALA7);Unigene0025128(PAA2);Unigene0027281(HMA4);Unigene0028066(ACA8);Unigene0034613(ALA4);Unigene0035906(PMA3)
GO:0016763	transferase activity, transferring pentosyl groups	0.61761	Unigene0000027(ctps);Unigene0002656(PRS3);Unigene0002658(PRS3);Unigene0006020(KIN14I);Unigene0009226(qtrt1);Unigene0009909(SRO5);Unigene0015656(HISN3);Unigene0016008(GAE4);Unigene0017784(APT5);Unigene0018593(PDX1);Unigene0020326(HISN4);Unigene0023865(ASB1);Unigene0023866(XTH28);Unigene0025048(GLCAT14A);Unigene0026781(AS);Unigene0026976(HISN1A);Unigene0027508(SRO5);Unigene0031899(GFPT2);Unigene003…
GO:0008266	poly(U) RNA binding	0.621541	Unigene0001987(CSP41A);Unigene0025833(SHM1);Unigene0025834(SHM1);Unigene0030875(HPR);Unigene0033207(PETH);Unigene0033208(PETH)
GO:0061630	ubiquitin protein ligase activity	0.621541	Unigene0000901(Os04g0590900);Unigene0001406(WAV3);Unigene0001532(SIS3);Unigene0002072(ATL6);Unigene0002690(ATL46);Unigene0003091(WAVH1);Unigene0004134(ATL60);Unigene0004534(NIP2);Unigene0005072(WAV3);Unigene0006689(SGR9);Unigene0008031(ATL65);Unigene0008553(ORTH2);Unigene0008615(RHA4A);Unigene0009020(ATL60);Unigene0009068(BRH1);Unigene0010216(BAH1);Unigene0011636(EDA40);Unigene0012506(NIP1);Unige…
GO:0019900	kinase binding	0.627532	Unigene0000074(PTI13);Unigene0002106(BZIP34);Unigene0002114(dnaJ);Unigene0005163(NAC048);Unigene0006582(TOL6);Unigene0016473(WNK5);Unigene0016712(CYCU4-1);Unigene0016899(At4g36390);Unigene0017460(PNSL5);Unigene0019567(AHP4);Unigene0019977(--);Unigene0023035(UNC);Unigene0023856(Zpr1);Unigene0024204(GAPA1);Unigene0024206(GAPA1);Unigene0031731(AHK3);Unigene0033963(AHK4);Unigene0033966(AHK4);Unigene0…
GO:0015444	magnesium-importing ATPase activity	0.631148	Unigene0000226(HMA4);Unigene0001571(HMA5);Unigene0004478(RAN1);Unigene0004957(HMA4);Unigene0007316(ALA9);Unigene0011512(LCA1);Unigene0011514(LCA1);Unigene0012869(ACA13);Unigene0014806(ALA8);Unigene0018086(PMA4);Unigene0019113(ALA7);Unigene0025128(PAA2);Unigene0027281(HMA4);Unigene0028066(ACA8);Unigene0034613(ALA4);Unigene0035906(PMA3)
GO:0016433	rRNA (adenine) methyltransferase activity	0.64206	Unigene0013143(SMT2);Unigene0013144(SMT2);Unigene0014913(At5g03795);Unigene0017687(rlmN);Unigene0019244(PRMT3);Unigene0025689(ufaA1);Unigene0032610(mettl16);Unigene0034392(PFC1)
GO:0004024	alcohol dehydrogenase activity, zinc-dependent	0.644752	Unigene0002191(CAD1);Unigene0007956(CAD6);Unigene0013663(8HGO);Unigene0015726(At5g42250);Unigene0029719(ADH1);Unigene0029720(ADH1);Unigene0031033(SDH);Unigene0033505(ADH1);Unigene0034267(EO);Unigene0035073(10HGO)
GO:0050607	mycothiol-dependent formaldehyde dehydrogenase activity	0.644752	Unigene0002191(CAD1);Unigene0007956(CAD6);Unigene0013663(8HGO);Unigene0015726(At5g42250);Unigene0029719(ADH1);Unigene0029720(ADH1);Unigene0031033(SDH);Unigene0033505(ADH1);Unigene0034267(EO);Unigene0035073(10HGO)
GO:0015666	restriction endodeoxyribonuclease activity	0.644752	Unigene0008535(GAD);Unigene0019010(--);Unigene0020699(--);Unigene0024296(syf1);Unigene0034641(--)
GO:0019238	cyclohydrolase activity	0.644752	Unigene0003705(CARB);Unigene0003706(CARB);Unigene0024468(AK2);Unigene0025621(RPI4);Unigene0030315(RIBA1)
GO:0045330	aspartyl esterase activity	0.644752	Unigene0000219(PME40);Unigene0012248(PMEU1);Unigene0028935(PME44);Unigene0036594(PME32);Unigene0036596(PME54)
GO:0016877	ligase activity, forming carbon-sulfur bonds	0.650996	Unigene0000616(AAE17);Unigene0003705(CARB);Unigene0003706(CARB);Unigene0004052(LACS1);Unigene0004248(AAE3);Unigene0006550(4CLL1);Unigene0010734(AAE2);Unigene0013983(4CLL9);Unigene0020507(fadD28);Unigene0021227(AAE14);Unigene0022994(4CL1);Unigene0028055(LACS6);Unigene0028506(ACS);Unigene0030658(UBA1);Unigene0031635(SAE2);Unigene0032247(4CLL7);Unigene0033221(LACS2);Unigene0034510(UBA3);Unigene00348…
GO:0003843	1,3-beta-D-glucan synthase activity	0.6606	Unigene0004006(CALS5);Unigene0026391(CALS11);Unigene0031289(CALS7);Unigene0031290(CALS3)
GO:0003867	4-aminobutyrate transaminase activity	0.6606	Unigene0005725(AG118);Unigene0009877(GSA);Unigene0016089(BIO3-BIO1);Unigene0020279(AGT2)
GO:0004049	anthranilate synthase activity	0.6606	Unigene0007167(ASA1);Unigene0023865(ASB1);Unigene0023866(XTH28);Unigene0028373(ASA1)
GO:0004587	ornithine-oxo-acid transaminase activity	0.6606	Unigene0005725(AG118);Unigene0009877(GSA);Unigene0016089(BIO3-BIO1);Unigene0020279(AGT2)
GO:0005496	steroid binding	0.6606	Unigene0009885(RPP1A);Unigene0029176(MSBP2);Unigene0032507(NPC1);Unigene0034477(MSI2)
GO:0001134	transcription factor activity, transcription factor recruiting	0.6606	Unigene0002722(MYB62);Unigene0010530(MYB308);Unigene0025110(MYB61);Unigene0025582(MYB3R5);Unigene0026431(MYB61);Unigene0028560(MYB15);Unigene0029401(MYB94)
GO:0001135	transcription factor activity, RNA polymerase II transcription factor recruiting	0.6606	Unigene0002722(MYB62);Unigene0010530(MYB308);Unigene0025110(MYB61);Unigene0025582(MYB3R5);Unigene0026431(MYB61);Unigene0028560(MYB15);Unigene0029401(MYB94)
GO:0030976	thiamine pyrophosphate binding	0.6606	Unigene0000400(PHYLLO);Unigene0003082(PDC1);Unigene0028847(At1g21400);Unigene0030692(Os07g0190000);Unigene0031815(Os07g0190000);Unigene0031878(TKL-2);Unigene0036509(TKT2)
GO:0016628	oxidoreductase activity, acting on the CH-CH group of donors, NAD or NADP as acceptor	0.6606	Unigene0000337(DVR);Unigene0000366(CHLP);Unigene0000716(Os04g0179200);Unigene0001771(DIM);Unigene0001772(DIM);Unigene0003765(TIC32);Unigene0004373(CCR1);Unigene0005128(ECR);Unigene0008384(MT0715);Unigene0010197(KCR1);Unigene0012190(TIC32B);Unigene0014012(SDR2b);Unigene0016008(GAE4);Unigene0017890(EMB2758);Unigene0019568(--);Unigene0021357(HSD1);Unigene0022643(SNL6);Unigene0022926(CHLP);Unigene002…
GO:0019904	protein domain specific binding	0.6606	Unigene0000973(CURT1B);Unigene0001904(OsI_16936);Unigene0001955(PPF-1);Unigene0002236(TFT4);Unigene0003158(GRF12);Unigene0004784(EMB3003);Unigene0005601(DMT1);Unigene0005602(MET2);Unigene0008411(CAM-1);Unigene0008520(PSAF);Unigene0010019(GF14D);Unigene0017058(KIN10);Unigene0019072(At1g32060);Unigene0023108(LHCA1);Unigene0026319(THIC);Unigene0026338(GBF);Unigene0028106(ZCYB);Unigene0028871(ssx2ip-…
GO:0016759	cellulose synthase activity	0.6606	Unigene0000022(CESA2);Unigene0001171(CSLD2);Unigene0001172(CSLD3);Unigene0007422(CSLG3);Unigene0024581(CESA2);Unigene0030594(CESA2);Unigene0030595(CESA2);Unigene0035841(CSLE1);Unigene0035842(CSLE1)
GO:0016760	cellulose synthase (UDP-forming) activity	0.6606	Unigene0000022(CESA2);Unigene0001171(CSLD2);Unigene0001172(CSLD3);Unigene0007422(CSLG3);Unigene0024581(CESA2);Unigene0030594(CESA2);Unigene0030595(CESA2);Unigene0035841(CSLE1);Unigene0035842(CSLE1)
GO:0004075	biotin carboxylase activity	0.6606	Unigene0003705(CARB);Unigene0003706(CARB);Unigene0028309(POPTRDRAFT_831870)
GO:0004335	galactokinase activity	0.6606	Unigene0010722(ARA1);Unigene0030037(HSK);Unigene0030443(GALAK)
GO:0004420	hydroxymethylglutaryl-CoA reductase (NADPH) activity	0.6606	Unigene0026465(HMGR2);Unigene0026469(HMGR2);Unigene0031273(HMG3)
GO:0004766	spermidine synthase activity	0.6606	Unigene0026801(SPDSYN1);Unigene0026802(SPDSYN1);Unigene0032861(ACL5)
GO:0004844	uracil DNA N-glycosylase activity	0.6606	Unigene0001245(At1g28390);Unigene0004306(MYH);Unigene0027659(ROS1)
GO:0010277	chlorophyllide a oxygenase [overall] activity	0.6606	Unigene0006489(At5g41840);Unigene0026665(TIC55);Unigene0031734(PAO)
GO:0010428	methyl-CpNpG binding	0.6606	Unigene0008553(ORTH2);Unigene0017976(ORTH2);Unigene0017978(ORTH2)
GO:0010429	methyl-CpNpN binding	0.6606	Unigene0008553(ORTH2);Unigene0017976(ORTH2);Unigene0017978(ORTH2)
GO:0016892	endoribonuclease activity, producing 3'-phosphomonoesters	0.6606	Unigene0006990(PTL);Unigene0024767(RNS1);Unigene0033654(RIDA)
GO:0043891	glyceraldehyde-3-phosphate dehydrogenase (NAD(P)+) (phosphorylating) activity	0.6606	Unigene0024204(GAPA1);Unigene0024206(GAPA1);Unigene0029840(GAPB)
GO:0048487	beta-tubulin binding	0.6606	Unigene0023873(DUF8);Unigene0024872(HDA14);Unigene0032327(DDB_G0278111)
GO:0070405	ammonium ion binding	0.6606	Unigene0005642(SYT3);Unigene0012008(--);Unigene0027863(SYT3)
GO:0097506	deaminated base DNA N-glycosylase activity	0.6606	Unigene0001245(At1g28390);Unigene0004306(MYH);Unigene0027659(ROS1)
GO:0000404	heteroduplex DNA loop binding	0.6606	Unigene0005487(RAD4);Unigene0029061(MSH2)
GO:0004309	exopolyphosphatase activity	0.6606	Unigene0022760(ppx);Unigene0025522(Prune2)
GO:0004392	heme oxygenase (decyclizing) activity	0.6606	Unigene0023800(HO1);Unigene0023801(MEE23)
GO:0004476	mannose-6-phosphate isomerase activity	0.6606	Unigene0032564(PMI2);Unigene0033105(PTAC12)
GO:0004514	nicotinate-nucleotide diphosphorylase (carboxylating) activity	0.6606	Unigene0035213(QPT);Unigene0035645(NAPRT1)
GO:0004604	phosphoadenylyl-sulfate reductase (thioredoxin) activity	0.6606	Unigene0017939(APR3);Unigene0035763(SPCC1235.04c)
GO:0004612	phosphoenolpyruvate carboxykinase (ATP) activity	0.6606	Unigene0009391(PCK);Unigene0033484(PCKA)
GO:0008115	sarcosine oxidase activity	0.6606	Unigene0003503(At2g24580);Unigene0003504(At2g24580)
GO:0008452	RNA ligase activity	0.6606	Unigene0032278(ZBP14);Unigene0035402(At1g03050)
GO:0008559	xenobiotic-transporting ATPase activity	0.6606	Unigene0025224(ABCC9);Unigene0027403(ABCC4)
GO:0015245	fatty acid transporter activity	0.6606	Unigene0000445(ABCG11);Unigene0007936(ABCG11)
GO:0016427	tRNA (cytosine) methyltransferase activity	0.6606	Unigene0011568(NOP2C);Unigene0025532(GCL1)
GO:0018822	nitrile hydratase activity	0.6606	Unigene0006476(--);Unigene0031508(--)
GO:0030975	thiamine binding	0.6606	Unigene0004543(--);Unigene0011445(TPK2)
GO:0032050	clathrin heavy chain binding	0.6606	Unigene0018888(At2g20760);Unigene0027764(Os04g0679100)
GO:0036361	racemase activity, acting on amino acids and derivatives	0.6606	Unigene0001904(OsI_16936);Unigene0028139(--)
GO:0046408	chlorophyll synthetase activity	0.6606	Unigene0000947(CHLG);Unigene0018870(ABC4)
GO:0046524	sucrose-phosphate synthase activity	0.6606	Unigene0004535(SPS1);Unigene0009286(SPS2)
GO:0046625	sphingolipid binding	0.6606	Unigene0019977(--);Unigene0036243(GLTP3)
GO:0047661	amino-acid racemase activity	0.6606	Unigene0001904(OsI_16936);Unigene0028139(--)
GO:0070180	large ribosomal subunit rRNA binding	0.6606	Unigene0022815(RPL23);Unigene0031109(Os01g0184500)
GO:0071253	connexin binding	0.6606	Unigene0031471(--);Unigene0033984(--)
GO:0000166	nucleotide binding	0.664194	Unigene0000008(CRK5);Unigene0000015(TUBB1);Unigene0000018(R1A-4);Unigene0000020(XI-F);Unigene0000023(At5g35370);Unigene0000027(ctps);Unigene0000029(At1g56140);Unigene0000030(At1g56140);Unigene0000057(R1A-10);Unigene0000074(PTI13);Unigene0000077(ARAC11);Unigene0000083(RPP13L3);Unigene0000085(R1B-16);Unigene0000094(R1B-19);Unigene0000100(R1B-16);Unigene0000151(LON1);Unigene0000152(RPP13L3);Unigene0…
GO:0046406	magnesium protoporphyrin IX methyltransferase activity	0.664194	Unigene0007200(arsM);Unigene0013143(SMT2);Unigene0013144(SMT2);Unigene0017199(PIMT1);Unigene0019244(PRMT3);Unigene0024208(EEF1AKNMT);Unigene0024781(MENG);Unigene0025689(ufaA1);Unigene0026894(RID2);Unigene0030853(mettl21a);Unigene0030879(TRM9);Unigene0033701(CHLM)
GO:1901265	nucleoside phosphate binding	0.66626	Unigene0000008(CRK5);Unigene0000015(TUBB1);Unigene0000018(R1A-4);Unigene0000020(XI-F);Unigene0000023(At5g35370);Unigene0000027(ctps);Unigene0000029(At1g56140);Unigene0000030(At1g56140);Unigene0000057(R1A-10);Unigene0000074(PTI13);Unigene0000077(ARAC11);Unigene0000083(RPP13L3);Unigene0000085(R1B-16);Unigene0000094(R1B-19);Unigene0000100(R1B-16);Unigene0000151(LON1);Unigene0000152(RPP13L3);Unigene0…
GO:0005372	water transmembrane transporter activity	0.66626	Unigene0003574(TIP1-1);Unigene0014034(PIP2-7);Unigene0018610(NIP1-1);Unigene0023396(TIP4-1);Unigene0025700(PIP2-7);Unigene0027501(NIP3-1)
GO:0008187	poly-pyrimidine tract binding	0.66626	Unigene0001987(CSP41A);Unigene0025833(SHM1);Unigene0025834(SHM1);Unigene0030875(HPR);Unigene0033207(PETH);Unigene0033208(PETH)
GO:0015149	hexose transmembrane transporter activity	0.66626	Unigene0001160(STP14);Unigene0011642(NPF5.5);Unigene0011854(PLT6);Unigene0022847(MSSP2);Unigene0026778(PHT4;4);Unigene0035849(At5g59250)
GO:0015250	water channel activity	0.66626	Unigene0003574(TIP1-1);Unigene0014034(PIP2-7);Unigene0018610(NIP1-1);Unigene0023396(TIP4-1);Unigene0025700(PIP2-7);Unigene0027501(NIP3-1)
GO:0008289	lipid binding	0.66626	Unigene0000712(ATHB-15);Unigene0000713(REV);Unigene0001411(ORP2A);Unigene0001500(EDR2);Unigene0002000(--);Unigene0002925(GDCST);Unigene0003320(ACBP3);Unigene0003347(LSAT_1X82001);Unigene0005642(SYT3);Unigene0005768(ROC3);Unigene0005802(ANN4);Unigene0006514(LSAT_1X82001);Unigene0007285(PATL4);Unigene0007788(ACBP3);Unigene0008941(At1g25240);Unigene0009885(RPP1A);Unigene0012008(--);Unigene0013985(AN…
GO:0016791	phosphatase activity	0.66626	Unigene0000226(HMA4);Unigene0000691(APS1);Unigene0000759(RAM2);Unigene0000925(At3g55800);Unigene0001534(NT5C3B);Unigene0001571(HMA5);Unigene0001720(--);Unigene0002914(SGPP);Unigene0003368(At5g09300);Unigene0003370(SAL1);Unigene0003853(FKFBP);Unigene0004070(GPAT6);Unigene0004478(RAN1);Unigene0004535(SPS1);Unigene0004957(HMA4);Unigene0005977(At3g16560);Unigene0006182(TPPI);Unigene0007316(ALA9);Unig…
GO:0004180	carboxypeptidase activity	0.66626	Unigene0000091(SCPL19);Unigene0001093(SCPL50);Unigene0005689(SCPL45);Unigene0015655(PRCP);Unigene0016467(UAH);Unigene0023617(SCPL34);Unigene0028721(--);Unigene0030258(SCPL42);Unigene0030948(SCPL40);Unigene0030994(SCPL29);Unigene0031437(SCPL18);Unigene0034999(SCPL18);Unigene0035833(SCPL45);Unigene0036399(SCPL18);Unigene0036497(SCP26)
GO:0008556	potassium-transporting ATPase activity	0.66626	Unigene0000226(HMA4);Unigene0001571(HMA5);Unigene0004478(RAN1);Unigene0004957(HMA4);Unigene0007316(ALA9);Unigene0011512(LCA1);Unigene0012869(ACA13);Unigene0014806(ALA8);Unigene0018086(PMA4);Unigene0019113(ALA7);Unigene0025128(PAA2);Unigene0027281(HMA4);Unigene0028066(ACA8);Unigene0034613(ALA4);Unigene0035906(PMA3)
GO:0061659	ubiquitin-like protein ligase activity	0.683641	Unigene0000901(Os04g0590900);Unigene0001406(WAV3);Unigene0001532(SIS3);Unigene0002072(ATL6);Unigene0002690(ATL46);Unigene0003091(WAVH1);Unigene0004134(ATL60);Unigene0004534(NIP2);Unigene0005072(WAV3);Unigene0006689(SGR9);Unigene0008031(ATL65);Unigene0008553(ORTH2);Unigene0008615(RHA4A);Unigene0009020(ATL60);Unigene0009068(BRH1);Unigene0010216(BAH1);Unigene0011636(EDA40);Unigene0012506(NIP1);Unige…
GO:0016853	isomerase activity	0.683999	Unigene0000205(DDS);Unigene0000288(A1);Unigene0000365(FAR2);Unigene0000386(ICS2);Unigene0000625(ZDS);Unigene0000716(Os04g0179200);Unigene0001259(CBF5);Unigene0001276(UXS5);Unigene0001594(IPI2);Unigene0001791(MLO9);Unigene0001811(INPS1);Unigene0001904(OsI_16936);Unigene0001987(CSP41A);Unigene0002088(ERDJ3A);Unigene0002323(VIT_05s0020g02800);Unigene0002746(CDR1);Unigene0002762(3BETAHSD/D2);Unigene0…
GO:0004713	protein tyrosine kinase activity	0.698689	Unigene0000074(PTI13);Unigene0003515(At2g41970);Unigene0018880(CEPR1);Unigene0025784(BAK1);Unigene0027001(ILK1)
GO:0008252	nucleotidase activity	0.698689	Unigene0001534(NT5C3B);Unigene0003368(At5g09300);Unigene0003370(SAL1);Unigene0025885(DDB_G0275467);Unigene0033673(ENDO1)
GO:0008780	acyl-[acyl-carrier-protein]-UDP-N-acetylglucosamine O-acyltransferase activity	0.698689	Unigene0005762(CRK26);Unigene0018646(SAT3);Unigene0020015(SAT1);Unigene0025853(SAT3);Unigene0031321(SAT3)
GO:0016869	intramolecular transferase activity, transferring amino groups	0.698689	Unigene0005725(AG118);Unigene0009877(GSA);Unigene0016089(BIO3-BIO1);Unigene0020279(AGT2);Unigene0031771(PAL1)
GO:0047590	5-dehydro-2-deoxygluconokinase activity	0.698689	Unigene0002950(FLN1);Unigene0017316(At1g66430);Unigene0024140(yihV);Unigene0025319(FRK2);Unigene0031125(FLN2)
GO:0008565	protein transporter activity	0.702866	Unigene0000283(ABCG18);Unigene0000445(ABCG11);Unigene0000565(YMF16);Unigene0000781(ABCG32);Unigene0000849(ABCB4);Unigene0001190(--);Unigene0001456(TIM8);Unigene0001955(PPF-1);Unigene0002164(At1g76070);Unigene0005148(ABCG15);Unigene0005488(SECE1);Unigene0006575(ABCG11);Unigene0007936(ABCG11);Unigene0008246(ABCG36);Unigene0008248(PDR1);Unigene0012771(--);Unigene0014934(ABCC4);Unigene0015668(--);Uni…
GO:0004124	cysteine synthase activity	0.702866	Unigene0001904(OsI_16936);Unigene0005366(MGL);Unigene0014409(RCS3);Unigene0018357(PCAS-1);Unigene0025112(speA);Unigene0030551(trpB2);Unigene0032041(CGS1)
GO:0004400	histidinol-phosphate transaminase activity	0.702866	Unigene0009219(ACS2);Unigene0009853(TAR4);Unigene0009854(TAR4);Unigene0011372(TAT);Unigene0018264(GGAT1);Unigene0019878(NIFS1);Unigene0028034(At5g53970)
GO:0016888	endodeoxyribonuclease activity, producing 5'-phosphomonoesters	0.702866	Unigene0008535(GAD);Unigene0019010(--);Unigene0020699(--);Unigene0024296(syf1);Unigene0026861(PS1);Unigene0026917(--);Unigene0034641(--)
GO:1901363	heterocyclic compound binding	0.719733	Unigene0000007(--);Unigene0000008(CRK5);Unigene0000015(TUBB1);Unigene0000018(R1A-4);Unigene0000020(XI-F);Unigene0000023(At5g35370);Unigene0000027(ctps);Unigene0000029(At1g56140);Unigene0000030(At1g56140);Unigene0000057(R1A-10);Unigene0000074(PTI13);Unigene0000077(ARAC11);Unigene0000083(RPP13L3);Unigene0000085(R1B-16);Unigene0000094(R1B-19);Unigene0000100(R1B-16);Unigene0000117(WRKY22);Unigene0000…
5(BLH1);Unigene0033484(PCKA);Unigene0033505(ADH1);Unigene0033509(HXK2);Unigene0033514(CURT1A);Unigene0033519(ATHB-13);Unigene0033520(ATHB-13);Unigene0033526(RPP13L3);Unigene0033527(CP29B);Unigene0033593(--);Unigene0033603(ABCG25);Unigene0033629(CNGC14);Unigene0033638(SQE1);Unigene0033639(SQE1);Unigene0033662(KIN13B);Unigene0033673(ENDO1);Unigene0033691(HAT4);Unigene0033692(HAT3);Unigene0033693(AT…
GO:0019787	ubiquitin-like protein transferase activity	0.720225	Unigene0000901(Os04g0590900);Unigene0001406(WAV3);Unigene0001532(SIS3);Unigene0002072(ATL6);Unigene0002690(ATL46);Unigene0003091(WAVH1);Unigene0003464(PUB28);Unigene0003808(PUB8);Unigene0004134(ATL60);Unigene0004534(NIP2);Unigene0004772(FBX6);Unigene0005072(WAV3);Unigene0006281(PUB30);Unigene0006689(SGR9);Unigene0006933(PUB23);Unigene0008031(ATL65);Unigene0008553(ORTH2);Unigene0008615(RHA4A);Unig…
GO:0097159	organic cyclic compound binding	0.724224	Unigene0000007(--);Unigene0000008(CRK5);Unigene0000015(TUBB1);Unigene0000018(R1A-4);Unigene0000020(XI-F);Unigene0000023(At5g35370);Unigene0000027(ctps);Unigene0000029(At1g56140);Unigene0000030(At1g56140);Unigene0000057(R1A-10);Unigene0000074(PTI13);Unigene0000077(ARAC11);Unigene0000083(RPP13L3);Unigene0000085(R1B-16);Unigene0000094(R1B-19);Unigene0000100(R1B-16);Unigene0000117(WRKY22);Unigene0000…
439(--);Unigene0033465(BLH1);Unigene0033484(PCKA);Unigene0033505(ADH1);Unigene0033509(HXK2);Unigene0033514(CURT1A);Unigene0033519(ATHB-13);Unigene0033520(ATHB-13);Unigene0033526(RPP13L3);Unigene0033527(CP29B);Unigene0033593(--);Unigene0033603(ABCG25);Unigene0033629(CNGC14);Unigene0033638(SQE1);Unigene0033639(SQE1);Unigene0033662(KIN13B);Unigene0033673(ENDO1);Unigene0033691(HAT4);Unigene0033692(HA…
GO:0003840	gamma-glutamyltransferase activity	0.726516	Unigene0000790(GGT3);Unigene0002945(GGT3);Unigene0015308(GGT3);Unigene0015309(GGT3)
GO:0004496	mevalonate kinase activity	0.726516	Unigene0010722(ARA1);Unigene0030037(HSK);Unigene0030443(GALAK);Unigene0032790(ISPE)
GO:0004795	threonine synthase activity	0.726516	Unigene0000700(At3g02650);Unigene0001904(OsI_16936);Unigene0014409(RCS3);Unigene0018357(PCAS-1)
GO:0009036	Type II site-specific deoxyribonuclease activity	0.726516	Unigene0019010(--);Unigene0020699(--);Unigene0024296(syf1);Unigene0034641(--)
GO:0015105	arsenite transmembrane transporter activity	0.726516	Unigene0016838(LSI2);Unigene0018610(NIP1-1);Unigene0027501(NIP3-1);Unigene0032068(TDT)
GO:0043178	alcohol binding	0.726516	Unigene0005642(SYT3);Unigene0012008(--);Unigene0027863(SYT3);Unigene0032507(NPC1)
GO:0004738	pyruvate dehydrogenase activity	0.726516	Unigene0003368(At5g09300);Unigene0004784(EMB3003);Unigene0026216(BCCP1);Unigene0028847(At1g21400);Unigene0030692(Os07g0190000);Unigene0031815(Os07g0190000);Unigene0031878(TKL-2);Unigene0036509(TKT2)
GO:0016885	ligase activity, forming carbon-carbon bonds	0.726516	Unigene0000129(CAC3);Unigene0003705(CARB);Unigene0003706(CARB);Unigene0004784(EMB3003);Unigene0007304(HMGCL);Unigene0021416(accD);Unigene0026216(BCCP1);Unigene0028309(POPTRDRAFT_831870)
GO:0016624	oxidoreductase activity, acting on the aldehyde or oxo group of donors, disulfide as acceptor	0.726516	Unigene0003368(At5g09300);Unigene0028847(At1g21400);Unigene0030692(Os07g0190000);Unigene0031815(Os07g0190000);Unigene0031878(TKL-2);Unigene0036509(TKT2)
GO:0019134	glucosamine-1-phosphate N-acetyltransferase activity	0.726516	Unigene0005762(CRK26);Unigene0018646(SAT3);Unigene0020015(SAT1);Unigene0021418(ADG2);Unigene0025853(SAT3);Unigene0031321(SAT3)
GO:0004029	aldehyde dehydrogenase (NAD) activity	0.726516	Unigene0001111(GAPN);Unigene0001820(ALDH7B4);Unigene0002191(CAD1);Unigene0013663(8HGO);Unigene0015726(At5g42250);Unigene0024161(ALDH2B4);Unigene0025643(ALDH2C4);Unigene0029719(ADH1);Unigene0029720(ADH1);Unigene0031033(SDH);Unigene0033505(ADH1);Unigene0033860(ALDH);Unigene0033861(ALDH);Unigene0034267(EO);Unigene0035073(10HGO)
GO:0008661	1-deoxy-D-xylulose-5-phosphate synthase activity	0.726516	Unigene0003368(At5g09300);Unigene0013176(Os07g0190000);Unigene0028847(At1g21400);Unigene0030692(Os07g0190000);Unigene0031815(Os07g0190000);Unigene0031878(TKL-2);Unigene0036509(TKT2)
GO:0001653	peptide receptor activity	0.726516	Unigene0018880(CEPR1);Unigene0024485(RLK7);Unigene0028569(OFUT23)
GO:0003844	1,4-alpha-glucan branching enzyme activity	0.726516	Unigene0014085(SBEI);Unigene0022224(PU1);Unigene0032534(SBE3)
GO:0004089	carbonate dehydratase activity	0.726516	Unigene0031966(BCA1);Unigene0034267(EO);Unigene0034270(BCA2)
GO:0004637	phosphoribosylamine-glycine ligase activity	0.726516	Unigene0003705(CARB);Unigene0003706(CARB);Unigene0028309(POPTRDRAFT_831870)
GO:0005094	Rho GDP-dissociation inhibitor activity	0.726516	Unigene0001865(GDI1);Unigene0012663(NPF5.2);Unigene0023729(DEGP10)
GO:0008444	CDP-diacylglycerol-glycerol-3-phosphate 3-phosphatidyltransferase activity	0.726516	Unigene0006172(Os03g0283600);Unigene0018057(AAPT1);Unigene0023593(--)
GO:0008474	palmitoyl-(protein) hydrolase activity	0.726516	Unigene0004965(LYPLA1);Unigene0016904(WAV2);Unigene0026689(--)
GO:0009041	uridylate kinase activity	0.726516	Unigene0001514(UMK3);Unigene0024468(AK2);Unigene0032071(pyrH)
GO:0016862	intramolecular oxidoreductase activity, interconverting keto- and enol-groups	0.726516	Unigene0009032(--);Unigene0025401(--);Unigene0029441(--)
GO:0034485	phosphatidylinositol-3,4,5-trisphosphate 5-phosphatase activity	0.726516	Unigene0027236(IP5P8);Unigene0027238(IP5P4);Unigene0027584(PTEN1)
GO:0034594	phosphatidylinositol trisphosphate phosphatase activity	0.726516	Unigene0027236(IP5P8);Unigene0027238(IP5P4);Unigene0027584(PTEN1)
GO:0098599	palmitoyl hydrolase activity	0.726516	Unigene0004965(LYPLA1);Unigene0016904(WAV2);Unigene0026689(--)
GO:0000977	RNA polymerase II regulatory region sequence-specific DNA binding	0.726516	Unigene0001005(Solyc04g005320);Unigene0005305(TCP8);Unigene0010877(GATA9);Unigene0012184(AGL65);Unigene0014028(DEFA);Unigene0016572(PURA1);Unigene0016574(PURA1);Unigene0017147(AGL18);Unigene0031128(GATA17);Unigene0031350(AGL12);Unigene0031368(GATA17);Unigene0033945(GATA9);Unigene0034642(GATA15)
GO:0004747	ribokinase activity	0.726516	Unigene0002950(FLN1);Unigene0017316(At1g66430);Unigene0024140(yihV);Unigene0025319(FRK2);Unigene0031125(FLN2)
GO:0008327	methyl-CpG binding	0.726516	Unigene0005601(DMT1);Unigene0005602(MET2);Unigene0008553(ORTH2);Unigene0017976(ORTH2);Unigene0017978(ORTH2)
GO:0016717	oxidoreductase activity, acting on paired donors, with oxidation of a pair of donors resulting in the reduction of molecular oxygen to two molecules of water	0.726516	Unigene0000726(CRD1);Unigene0003428(ACPD);Unigene0005314(CYP710A11);Unigene0028213(ACPD);Unigene0035956(ACPD)
GO:0015036	disulfide oxidoreductase activity	0.726516	Unigene0001633(At5g39865);Unigene0005870(At5g39865);Unigene0006596(At5g16400);Unigene0007380(At1g12200);Unigene0007441(TBL5);Unigene0010822(At5g39865);Unigene0010949(GRXC6);Unigene0010991(At3g28850);Unigene0011656(NTR1);Unigene0012170(LPD2);Unigene0012931(--);Unigene0015747(DHAR2);Unigene0016815(GRXC1);Unigene0017939(APR3);Unigene0018626(CDSP32);Unigene0018909(GRXC13);Unigene0018998(GRXC6);Unigen…
GO:0043168	anion binding	0.726516	Unigene0000008(CRK5);Unigene0000015(TUBB1);Unigene0000018(R1A-4);Unigene0000020(XI-F);Unigene0000023(At5g35370);Unigene0000027(ctps);Unigene0000029(At1g56140);Unigene0000030(At1g56140);Unigene0000057(R1A-10);Unigene0000074(PTI13);Unigene0000077(ARAC11);Unigene0000083(RPP13L3);Unigene0000085(R1B-16);Unigene0000094(R1B-19);Unigene0000100(R1B-16);Unigene0000151(LON1);Unigene0000152(RPP13L3);Unigene0…
GO:0015081	sodium ion transmembrane transporter activity	0.726516	Unigene0000533(BASS1);Unigene0002879(BASS2);Unigene0004784(EMB3003);Unigene0007304(HMGCL);Unigene0012167(At1g31830);Unigene0018901(CAT1);Unigene0019900(CAT9);Unigene0020751(NHX2);Unigene0021737(--);Unigene0021761(BASS1);Unigene0026216(BCCP1);Unigene0029010(NHX2);Unigene0029012(NHX2);Unigene0029244(TIC100);Unigene0031777(NCL);Unigene0031944(MHX);Unigene0033492(ATJ11);Unigene0035741(CCX4);Unigene00…
GO:0004722	protein serine/threonine phosphatase activity	0.726516	Unigene0007922(At1g67820);Unigene0012199(PP2C6);Unigene0013910(AIP1);Unigene0014127(At1g16220);Unigene0014128(Os08g0500300);Unigene0016464(CBL7);Unigene0019079(At2g30020);Unigene0019277(At1g09160);Unigene0023955(At4g03415);Unigene0024096(HAB1);Unigene0027472(PP2C06);Unigene0028998(--);Unigene0032122(PP2C51);Unigene0032991(PPC6-1);Unigene0036302(At2g30020)
GO:0016783	sulfurtransferase activity	0.726516	Unigene0005366(MGL);Unigene0007858(BIO2);Unigene0008212(MCSU3);Unigene0018466(ABA3);Unigene0019878(NIFS1);Unigene0023243(--);Unigene0025112(speA);Unigene0025576(AGT1);Unigene0025833(SHM1);Unigene0025834(SHM1);Unigene0026308(--);Unigene0036443(SUFE2)
GO:0016836	hydro-lyase activity	0.726516	Unigene0000365(FAR2);Unigene0000400(PHYLLO);Unigene0000625(ZDS);Unigene0000716(Os04g0179200);Unigene0001258(CBF5);Unigene0001259(CBF5);Unigene0001276(UXS5);Unigene0001524(DHAD);Unigene0001904(OsI_16936);Unigene0001987(CSP41A);Unigene0002323(VIT_05s0020g02800);Unigene0002762(3BETAHSD/D2);Unigene0003332(ATP1);Unigene0003639(EGS1);Unigene0004373(CCR1);Unigene0004610(AXS2);Unigene0005115(At5g33370);U…
GO:0009008	DNA-methyltransferase activity	0.726516	Unigene0004932(MET1B);Unigene0005601(DMT1);Unigene0005602(MET2);Unigene0016167(CMT3);Unigene0020057(At4g27290);Unigene0029733(CMT2)
GO:0009931	calcium-dependent protein serine/threonine kinase activity	0.726516	Unigene0005308(CRK5);Unigene0009421(CPK20);Unigene0018581(CPK13);Unigene0024303(PPCK2);Unigene0025530(CCAMK);Unigene0028884(CPK19)
GO:0010857	calcium-dependent protein kinase activity	0.726516	Unigene0005308(CRK5);Unigene0009421(CPK20);Unigene0018581(CPK13);Unigene0024303(PPCK2);Unigene0025530(CCAMK);Unigene0028884(CPK19)
GO:0016730	oxidoreductase activity, acting on iron-sulfur proteins as donors	0.726516	Unigene0006048(HCF101);Unigene0012786(MIND1);Unigene0014768(--);Unigene0031734(PAO);Unigene0033207(PETH);Unigene0033208(PETH)
GO:0000285	1-phosphatidylinositol-3-phosphate 5-kinase activity	0.726516	Unigene0017944(FAB1A);Unigene0031943(FAB1B)
GO:0004121	cystathionine beta-lyase activity	0.726516	Unigene0005366(MGL);Unigene0032041(CGS1)
GO:0004324	ferredoxin-NADP+ reductase activity	0.726516	Unigene0033207(PETH);Unigene0033208(PETH)
GO:0008253	5'-nucleotidase activity	0.726516	Unigene0001534(NT5C3B);Unigene0025885(DDB_G0275467)
GO:0008495	protoheme IX farnesyltransferase activity	0.726516	Unigene0000947(CHLG);Unigene0015285(--)
GO:0016422	mRNA (2'-O-methyladenosine-N6-)-methyltransferase activity	0.726516	Unigene0032610(mettl16);Unigene0034392(PFC1)
GO:0016731	oxidoreductase activity, acting on iron-sulfur proteins as donors, NAD or NADP as acceptor	0.726516	Unigene0033207(PETH);Unigene0033208(PETH)
GO:0016929	SUMO-specific protease activity	0.726516	Unigene0009355(UBP15);Unigene0022128(ULP2B)
GO:0046428	1,4-dihydroxy-2-naphthoate octaprenyltransferase activity	0.726516	Unigene0008804(DTM1);Unigene0018870(ABC4)
GO:0047938	glucose-6-phosphate 1-epimerase activity	0.726516	Unigene0003761(--);Unigene0035030(--)
GO:0001012	RNA polymerase II regulatory region DNA binding	0.726516	Unigene0001005(Solyc04g005320);Unigene0005305(TCP8);Unigene0010877(GATA9);Unigene0012184(AGL65);Unigene0014028(DEFA);Unigene0016572(PURA1);Unigene0016574(PURA1);Unigene0017147(AGL18);Unigene0031128(GATA17);Unigene0031350(AGL12);Unigene0031368(GATA17);Unigene0033945(GATA9);Unigene0034642(GATA15)
GO:0005310	dicarboxylic acid transmembrane transporter activity	0.726516	Unigene0018713(DIT1);Unigene0025198(GATA8);Unigene0026287(At2g32040);Unigene0033940(BAT1)
GO:0015185	gamma-aminobutyric acid transmembrane transporter activity	0.726516	Unigene0012167(At1g31830);Unigene0018901(CAT1);Unigene0019900(CAT9);Unigene0033940(BAT1)
GO:0015927	trehalase activity	0.726516	Unigene0005837(AMY1.1);Unigene0014085(SBEI);Unigene0017232(AMY2);Unigene0024910(TRE1)
GO:0016160	amylase activity	0.726516	Unigene0005837(AMY1.1);Unigene0017232(AMY2);Unigene0025752(WAXY);Unigene0032221(BAM1)
[truncated: 6,489 more rows]
